# Supplementary material for: Tolerability and effect of inhibiting microfibrillar-associated protein 4 in small intestinal anastomotic healing
Source: Research Square preprint supplement (doi:10.21203/rs.3.rs-7132995/v1), 2025-09-11
Supplement: Supplementary file 1 [file 03cfa7ce4bf42ccc66f4db09.xlsx]

## Sheet: Ark 1 - xgse_anti-MFAP4
xgse_anti-MFAP4
	ONTOLOGY	ID	Description	setSize	enrichmentScore	NES	pvalue	p.adjust	qvalue	rank	leading_edge	core_enrichment
GO:0031674	CC	GO:0031674	I band	47	0.705271233915751	2.67096432412291	5.93560375389113e-10	1.57016504636267e-06	1.49993748194821e-06	470	tags=53%, list=15%, signal=46%	FLNA/DES/MYL9/PDLIM7/FLNC/CSRP1/PGM5/CFL2/PARVA/HSPB1/SYNPO2/BAG3/SORBS2/ACTN1/FKBP1A/PPP1R12A/ALDOA/NEXN/PDLIM3/PALLD/FLNA/PDLIM7/ATP2B4/DMD/PPP1R12B/CRYAB/ACTN2
GO:0032432	CC	GO:0032432	actin filament bundle	52	0.682852928149439	2.62383140451772	3.96115407833497e-10	1.57016504636267e-06	1.49993748194821e-06	444	tags=50%, list=14%, signal=44%	FLNA/TPM1/MYL9/PDLIM7/MYLK/PGM5/SORBS1/ACTA1/ZYX/MARCKS/CNN2/SORBS1/SYNPO2/BAG3/ACTA2/ABLIM1/ACTN1/CALD1/PPP1R12A/PDLIM3/PALLD/FLNA/PPP1R12C/LPP/PDLIM7/PPP1R12B/CRYAB/SEPTIN9
GO:0043292	CC	GO:0043292	contractile fiber	80	0.608939204375124	2.53598193285084	3.04953198803106e-10	1.57016504636267e-06	1.49993748194821e-06	440	tags=47%, list=14%, signal=41%	FLNA/TPM1/DES/MYL9/TPM2/PDLIM7/FLNC/SYNM/CSRP1/PGM5/ACTA1/TWF1/CFL2/PARVA/HSPB1/SYNPO2/MYH11/BAG3/VCL/SORBS2/ACTA2/ACTN1/FKBP1A/CALD1/PPP1R12A/TWF2/ALDOA/NEXN/PDLIM3/ACTG1/PALLD/FLNA/PDLIM7/ATP2B4/COL6A1/TMOD3/DMD/PPP1R12B/CRYAB/SVIL
GO:0030016	CC	GO:0030016	myofibril	77	0.606686029504471	2.50524170095732	1.02305855092705e-09	1.62379853203141e-06	1.55117214395297e-06	440	tags=46%, list=14%, signal=41%	FLNA/TPM1/DES/MYL9/TPM2/PDLIM7/FLNC/SYNM/CSRP1/PGM5/ACTA1/TWF1/CFL2/PARVA/HSPB1/SYNPO2/BAG3/VCL/SORBS2/ACTN1/FKBP1A/CALD1/PPP1R12A/TWF2/ALDOA/NEXN/PDLIM3/ACTG1/PALLD/FLNA/PDLIM7/ATP2B4/COL6A1/TMOD3/DMD/PPP1R12B/CRYAB/SVIL
GO:0007010	BP	GO:0007010	cytoskeleton organization	381	0.350312629691993	1.77821500741809	9.99278030343301e-10	1.62379853203141e-06	1.55117214395297e-06	472	tags=24%, list=15%, signal=23%	RHOB/CUL9/FLNA/S100A9/TPM1/DES/MYL9/CDC42/DSTN/CNN1/TPM2/LMNA/INF2/PDLIM7/CLIP1/FLNC/LIMD1/SYNM/CSRP1/PGM5/ALOX15/MAP7/SORBS1/GOLGA2/ACTA1/ANXA1/TWF1/ZYX/COTL1/CFL2/CAPG/CLIC4/CFL1/MARCKS/CNN2/APOA1/SORBS1/DRG1/SYNPO2/MYH11/ELMO3/GFAP/SORBS2/CLIP2/TBCB/ABLIM1/ACTN1/NCOR1/PFDN2/MAP1B/TUBB/CHMP4B/WASHC5/CALD1/PPP1R12A/TWF2/ALDOA/RMDN1/NEXN/SH3BGRL3/TUBB6/TAGLN2/PDLIM3/ACTG1/DPYSL3/PALLD/ACTR2/CD47/…
GO:0030018	CC	GO:0030018	Z disc	45	0.70712618789396	2.63596961543816	3.30781378793723e-09	3.75011574586712e-06	3.58238720311638e-06	470	tags=54%, list=15%, signal=47%	FLNA/DES/MYL9/PDLIM7/FLNC/CSRP1/PGM5/CFL2/PARVA/HSPB1/SYNPO2/BAG3/SORBS2/ACTN1/FKBP1A/PPP1R12A/NEXN/PDLIM3/PALLD/FLNA/PDLIM7/ATP2B4/DMD/PPP1R12B/CRYAB/ACTN2
GO:0097435	BP	GO:0097435	supramolecular fiber organization	266	0.392378955658053	1.89328145905154	3.24181514990088e-09	3.75011574586712e-06	3.58238720311638e-06	327	tags=21%, list=11%, signal=20%	RHOB/FLNA/TPM1/DES/MYL9/CDC42/DSTN/CNN1/LOXL2/TPM2/INF2/CLIP1/FLNC/CSRP1/PGM5/ALOX15/SORBS1/GOLGA2/ACTA1/COL2A1/TWF1/ZYX/COTL1/FMOD/CFL2/CAPG/CFL1/MARCKS/CLU/CNN2/APOA1/SORBS1/DRG1/SYNPO2/MYH11/ELMO3/GFAP/CLIP2/TBCB/ACTN1/PFDN2/MAP1B/COL14A1/FKBP1A/WASHC5/CALD1/TWF2/ALDOA/COL3A1/TAGLN2/ACTG1/DPYSL3/COL1A1/ACTR2/GPX1/CD47/FLNA
GO:0099081	CC	GO:0099081	supramolecular polymer	255	0.38588459592161	1.83912165835661	1.00687898031079e-08	9.98823948468299e-06	9.54150317920826e-06	533	tags=32%, list=17%, signal=29%	FLNA/TPM1/DES/MYL9/TPM2/LMNA/INF2/COL6A3/PDLIM7/MX1/CLIP1/FLNC/SYNM/CSRP1/PGM5/MAP7/GOLGA2/ACTA1/COL2A1/ANXA1/TWF1/COTL1/CFL2/PARVA/HSPB1/TBCA/SYNPO2/MYH11/BAG3/MX1/GFAP/NME2/VCL/SORBS2/CLIP2/TBCB/ACTA2/ACTN1/MAP1B/TUBB/CHMP4B/FKBP1A/CALD1/PPP1R12A/TWF2/ALDOA/PBXIP1/SARM1/RMDN1/NEXN/COL6A3/MAP2K2/COL3A1/TUBB6/PDLIM3/ACTG1/CCT3/DPYSL3/COL1A1/PALLD/FLNA/MAP4/PDLIM7/ATP2B4/COL6A1/TMOD3/DPYSL2/DMD/PP…
GO:0099512	CC	GO:0099512	supramolecular fiber	253	0.388965877728001	1.85166316927702	1.19432815191501e-08	1.05313202373306e-05	1.00602939767157e-05	533	tags=32%, list=17%, signal=29%	FLNA/TPM1/DES/MYL9/TPM2/LMNA/INF2/COL6A3/PDLIM7/MX1/CLIP1/FLNC/SYNM/CSRP1/PGM5/MAP7/GOLGA2/ACTA1/COL2A1/ANXA1/TWF1/COTL1/CFL2/PARVA/HSPB1/TBCA/SYNPO2/MYH11/BAG3/MX1/GFAP/NME2/VCL/SORBS2/CLIP2/TBCB/ACTA2/ACTN1/MAP1B/TUBB/CHMP4B/FKBP1A/CALD1/PPP1R12A/TWF2/ALDOA/PBXIP1/SARM1/RMDN1/NEXN/COL6A3/MAP2K2/COL3A1/TUBB6/PDLIM3/ACTG1/CCT3/DPYSL3/COL1A1/PALLD/FLNA/MAP4/PDLIM7/ATP2B4/COL6A1/TMOD3/DPYSL2/DMD/PP…
GO:0001725	CC	GO:0001725	stress fiber	47	0.66609708549048	2.5226061495085	2.38205042581641e-08	1.57532934827325e-05	1.5048708040991e-05	444	tags=48%, list=14%, signal=42%	TPM1/MYL9/PDLIM7/MYLK/PGM5/SORBS1/ACTA1/ZYX/CNN2/SORBS1/SYNPO2/BAG3/ACTA2/ABLIM1/ACTN1/CALD1/PPP1R12A/PDLIM3/PALLD/PPP1R12C/LPP/PDLIM7/PPP1R12B/SEPTIN9
GO:0097517	CC	GO:0097517	contractile actin filament bundle	47	0.66609708549048	2.5226061495085	2.38205042581641e-08	1.57532934827325e-05	1.5048708040991e-05	444	tags=48%, list=14%, signal=42%	TPM1/MYL9/PDLIM7/MYLK/PGM5/SORBS1/ACTA1/ZYX/CNN2/SORBS1/SYNPO2/BAG3/ACTA2/ABLIM1/ACTN1/CALD1/PPP1R12A/PDLIM3/PALLD/PPP1R12C/LPP/PDLIM7/PPP1R12B/SEPTIN9
GO:0005856	CC	GO:0005856	cytoskeleton	530	0.305255720002716	1.5906017016157	2.09003252604427e-08	1.57532934827325e-05	1.5048708040991e-05	533	tags=26%, list=17%, signal=26%	S100A12/FLNA/S100A9/TPM1/DES/MYL9/CDC42/DSTN/CNN1/TPM2/LMNA/INF2/PDLIM7/MX1/SLMAP/CLIP1/MYL6/FLNC/MYLK/SYNM/PGM5/MAP7/SORBS1/GOLGA2/ALDOC/ACTA1/ANXA1/TWF1/ZYX/COTL1/CFL2/PARVA/CAPG/CLIC4/CENPV/HSPB1/CFL1/MARCKS/CLU/CNN2/SORBS1/TBCA/ARHGDIB/SYNPO2/MYH11/BAG3/MX1/GFAP/NME2/VCL/SORBS2/CLIP2/SNX4/TBCB/ACTA2/ABLIM1/ACTN1/STOM/NCOR1/MAP1B/TUBB/CHMP4B/CALD1/PPP1R12A/TWF2/ALDOA/PBXIP1/TOP2A/ALDOB/IKBKG/S…
GO:0008092	MF	GO:0008092	cytoskeletal protein binding	300	0.357139723738949	1.76537307493617	2.81957385309126e-08	1.72124139216402e-05	1.64425675222375e-05	555	tags=31%, list=18%, signal=28%	FLNA/S100A9/TPM1/DES/S100A6/MYL9/DSTN/CNN1/TPM2/INF2/PDLIM7/MX1/CLIP1/TAGLN/FLNC/MYLK/GC/SYNM/CSRP1/SORBS1/GOLGA2/ALDOC/ACTA1/TWF1/COTL1/CFL2/PARVA/CAPG/CFL1/MARCKS/CLU/CNN2/SORBS1/TBCA/DRG1/SYNPO2/MYH11/MX1/VCL/CLIP2/TBCB/ABLIM1/ACTN1/MAP1B/CALD1/TWF2/YWHAH/ALDOA/ALDOB/RMDN1/NEXN/TAGLN2/FMR1/PDLIM3/S100A4/RTCB/DPYSL3/NFKB1/PALLD/ACTR2/FLNA/SBDS/SNTA1/MAP4/PDLIM7/P4HB/FES/TMOD3/TLN1/ARPC5/SORBS3/…
GO:0030017	CC	GO:0030017	sarcomere	64	0.609818677712237	2.44310979992356	4.64192685896749e-08	2.63130939662614e-05	2.51362084498375e-05	533	tags=49%, list=17%, signal=42%	FLNA/TPM1/DES/MYL9/TPM2/PDLIM7/FLNC/CSRP1/PGM5/ACTA1/CFL2/PARVA/HSPB1/SYNPO2/BAG3/SORBS2/ACTN1/FKBP1A/PPP1R12A/ALDOA/NEXN/PDLIM3/PALLD/FLNA/PDLIM7/ATP2B4/TMOD3/DMD/PPP1R12B/CRYAB/ACTN2/CALM3/ENO1/LMOD1
GO:0090130	BP	GO:0090130	tissue migration	81	0.542419822040875	2.25090572556753	2.62472913754409e-07	0.000138865669570333	0.00013265473156907	251	tags=21%, list=8%, signal=20%	RHOB/S100A12/S100A9/S100A2/LOXL2/MMP9/ACTA1/ANXA1/HSPB1/APOA1/RRAS/GLIPR2/PDCD6/ACTA2/HDAC7/GPLD1/GPI
GO:0043542	BP	GO:0043542	endothelial cell migration	54	0.613101593693864	2.36551072825474	3.34972596597054e-07	0.000163736424677977	0.000156413111541117	378	tags=30%, list=12%, signal=26%	RHOB/S100A12/S100A9/S100A2/LOXL2/ANXA1/HSPB1/APOA1/RRAS/PDCD6/HDAC7/GPLD1/GPI/GPX1/GRN/ATP2B4
GO:0006396	BP	GO:0006396	RNA processing	287	-0.454073505729119	-1.8227284431853	3.7137797936033e-07	0.000163736424677977	0.000156413111541117	927	tags=40%, list=30%, signal=31%	LSM8/INTS11/THUMPD1/EBNA1BP2/RPS13/FUS/SAFB/ADAR/RPL7A/SON/HTATSF1/THRAP3/PRKRA/WDR3/RBM12/THOC6/LSM3/BOP1/RPS25/LGALS3/POLR2A/SART1/HNRNPL/DHX37/RPS14/DCPS/RALY/ZC3H13/RBM14/SRSF1/TRMT112/CDC73/SYNCRIP/DDX21/NOB1/RPS17/DDX46/GEMIN5/RPS21/SNRPF/DDX42/CDC40/SRSF7/PELP1/CRNKL1/PPP1R8/SRSF3/SNRNP200/MTPAP/HNRNPD/HNRNPM/CPSF7/SDE2/RPL35/SRSF10/CDC5L/EFTUD2/TAF15/DDX17/PRMT9/DDX27/SMU1/MRM1/TSR1/DDX47…
GO:0030029	BP	GO:0030029	actin filament-based process	246	0.368992218973824	1.77981098381268	3.51539178777221e-07	0.000163736424677977	0.000156413111541117	472	tags=26%, list=15%, signal=24%	RHOB/FLNA/TPM1/MYL9/CDC42/DSTN/CNN1/TPM2/INF2/PDLIM7/MYL6/FLNC/CSRP1/PGM5/ALOX15/SORBS1/ACTA1/ANXA1/TWF1/ZYX/COTL1/CFL2/PARVA/CAPG/CFL1/MARCKS/CNN2/APOA1/SORBS1/SYNPO2/MYH11/ELMO3/ACTA2/ACTN1/WASHC5/CALD1/TWF2/ALDOA/TAGLN2/PDLIM3/ACTG1/DPYSL3/ACAP2/PALLD/ACTR2/CD47/FLNA/STRIP1/SNTA1/PDLIM7/GPD1L/TMOD3/TLN1/ARPC5/SORBS3/FARP1/PDCL3/ATP2A2/ATP1A2/SVIL/PRKG1/NCKAP1/CAP2/SH3BP1/ACTN2/KANK2
GO:0006936	BP	GO:0006936	muscle contraction	71	0.540161188479803	2.19981898274007	5.80898040554039e-07	0.000242631939465098	0.000231779927316908	533	tags=43%, list=17%, signal=36%	FLNA/TPM1/DES/MYL9/CNN1/TPM2/SLMAP/MYL6/MYLK/SYNM/ACTA1/MYH11/ATP1B1/ACTA2/CALD1/ALDOA/FLNA/SNTA1/GPD1L/ATP2B4/TMOD3/DMD/PPP1R12B/ATP2A2/CRYAB/ATP1A2/PRKG1/EMD/CLIC2/CALM3/ENO1/LMOD1
GO:0010631	BP	GO:0010631	epithelial cell migration	79	0.524767777707735	2.17349872481697	8.079041728093e-07	0.000305310834067362	0.000291655431206646	251	tags=19%, list=8%, signal=18%	RHOB/S100A12/S100A9/S100A2/LOXL2/MMP9/ANXA1/HSPB1/APOA1/RRAS/GLIPR2/PDCD6/HDAC7/GPLD1/GPI
GO:0090132	BP	GO:0090132	epithelium migration	79	0.524767777707735	2.17349872481697	8.079041728093e-07	0.000305310834067362	0.000291655431206646	251	tags=19%, list=8%, signal=18%	RHOB/S100A12/S100A9/S100A2/LOXL2/MMP9/ANXA1/HSPB1/APOA1/RRAS/GLIPR2/PDCD6/HDAC7/GPLD1/GPI
GO:0042641	CC	GO:0042641	actomyosin	49	0.626149772207258	2.38176753457274	1.16166129253125e-06	0.000419042909887635	0.000400300699943064	444	tags=46%, list=14%, signal=40%	TPM1/MYL9/PDLIM7/MYLK/PGM5/SORBS1/ACTA1/ZYX/CNN2/SORBS1/SYNPO2/BAG3/ACTA2/ABLIM1/ACTN1/CALD1/PPP1R12A/PDLIM3/PALLD/PPP1R12C/LPP/PDLIM7/PPP1R12B/SEPTIN9
GO:0006397	BP	GO:0006397	mRNA processing	181	-0.506129772815388	-1.95199345308612	1.21944566421474e-06	0.000420761773530792	0.000401942685294032	736	tags=37%, list=24%, signal=30%	RALY/ZC3H13/RBM14/SRSF1/CDC73/SYNCRIP/DDX46/GEMIN5/SNRPF/DDX42/CDC40/SRSF7/CRNKL1/PPP1R8/SRSF3/SNRNP200/MTPAP/HNRNPM/CPSF7/SDE2/SRSF10/CDC5L/EFTUD2/DDX17/PRMT9/SMU1/DDX47/SNRPD3/PPIL2/SCAF8/HNRNPA2B1/SRSF5/VIRMA/U2AF2/RBM10/DDX23/SRSF2/SRSF6/ZNF326/PRPF4/RBM8A/XRN2/RBMX/SYMPK/RBM39/MTREX/PNN/SNRPG/TRA2B/SNRNP70/HNRNPA3/SAFB2/DDX39B/RBM22/RBM3/BCAS2/ALYREF/SRSF4/NUDT21/CASC3/SNRPN/PTBP3/SUPT6H/CEL…
GO:0003012	BP	GO:0003012	muscle system process	92	0.496519926390987	2.13880805918708	1.4461108023887e-06	0.000464759825725242	0.00044397287044689	533	tags=39%, list=17%, signal=33%	FLNA/TPM1/DES/MYL9/CNN1/TPM2/LMNA/SLMAP/MYL6/MYLK/SYNM/ACTA1/TWF1/MYH11/ATP1B1/SORBS2/ACTA2/COL14A1/CALD1/ALDOA/FLNA/SNTA1/GPD1L/ATP2B4/COL6A1/TMOD3/DMD/PPP1R12B/ATP2A2/CRYAB/ATP1A2/PRKG1/EMD/CLIC2/CALM3/ENO1/LMOD1
GO:0048870	BP	GO:0048870	cell motility	344	0.319806978841826	1.61333667981487	1.46408715261228e-06	0.000464759825725242	0.00044397287044689	344	tags=18%, list=11%, signal=18%	RHOB/S100A12/FLNA/S100A9/S100A2/TPM1/S100A11/CDC42/DSTN/LOXL2/LMNA/PRTN3/AZU1/ELANE/CAVIN1/MYLK/LIMD1/POSTN/CD177/MMP9/ANXA1/PARVA/CLIC4/CENPV/HSPB1/CNN2/APOA1/DDT/RRAS/ARHGDIB/LAMC1/ELMO3/BSG/GLIPR2/VCL/PDCD6/MIEN1/ACTA2/ITGA5/HDAC7/MAP1B/CD9/GPLD1/PBXIP1/NEXN/GPI/MAP2K2/COL3A1/ACTG1/LAMA4/DPYSL3/COL1A1/PALLD/ITGA7/GPX1/CD47/FLNA/CPNE3/LGALS9/FN1/SBDS
GO:0001667	BP	GO:0001667	ameboidal-type cell migration	106	0.473365242007703	2.07740394459959	1.7498337323224e-06	0.000534103096142713	0.00051021467774032	251	tags=18%, list=8%, signal=17%	RHOB/S100A12/S100A9/S100A2/CDC42/LOXL2/MMP9/ANXA1/CENPV/HSPB1/APOA1/RRAS/ARHGDIB/GLIPR2/PDCD6/ACTA2/HDAC7/GPLD1/GPI
GO:0030036	BP	GO:0030036	actin cytoskeleton organization	227	0.361338036493639	1.7442161847184	2.50201762129518e-06	0.000735407846022169	0.000702515824895435	472	tags=25%, list=15%, signal=23%	RHOB/FLNA/TPM1/MYL9/CDC42/DSTN/CNN1/TPM2/INF2/PDLIM7/FLNC/CSRP1/PGM5/ALOX15/SORBS1/ACTA1/ANXA1/TWF1/ZYX/COTL1/CFL2/CAPG/CFL1/MARCKS/CNN2/APOA1/SORBS1/SYNPO2/MYH11/ELMO3/ACTN1/WASHC5/CALD1/TWF2/ALDOA/TAGLN2/PDLIM3/ACTG1/DPYSL3/PALLD/ACTR2/CD47/FLNA/STRIP1/PDLIM7/TMOD3/TLN1/ARPC5/SORBS3/FARP1/PDCL3/SVIL/PRKG1/NCKAP1/CAP2/SH3BP1/ACTN2/KANK2
GO:0016477	BP	GO:0016477	cell migration	316	0.324777389774483	1.62764804833885	3.31305769142962e-06	0.000939015208542339	0.000897016597506622	363	tags=18%, list=12%, signal=18%	RHOB/S100A12/FLNA/S100A9/S100A2/TPM1/S100A11/CDC42/LOXL2/LMNA/PRTN3/AZU1/ELANE/MYLK/LIMD1/POSTN/CD177/MMP9/ANXA1/PARVA/CLIC4/CENPV/HSPB1/CNN2/APOA1/DDT/RRAS/ARHGDIB/LAMC1/BSG/GLIPR2/VCL/PDCD6/MIEN1/ACTA2/ITGA5/HDAC7/MAP1B/CD9/GPLD1/PBXIP1/NEXN/GPI/COL3A1/ACTG1/LAMA4/DPYSL3/COL1A1/PALLD/ITGA7/GPX1/CD47/FLNA/CPNE3/LGALS9/FN1/SBDS/GRN/CD151
GO:0015629	CC	GO:0015629	actin cytoskeleton	193	0.378649078837061	1.77899654886533	3.57213063100429e-06	0.000977532023712072	0.000933810700707547	617	tags=38%, list=20%, signal=32%	FLNA/TPM1/MYL9/DSTN/CNN1/TPM2/INF2/PDLIM7/MYL6/MYLK/PGM5/SORBS1/ACTA1/ANXA1/TWF1/ZYX/COTL1/CFL2/PARVA/CAPG/CLIC4/CFL1/MARCKS/CNN2/SORBS1/SYNPO2/MYH11/BAG3/VCL/SORBS2/ACTA2/ABLIM1/ACTN1/CALD1/PPP1R12A/TWF2/ALDOA/NEXN/TAGLN2/PDLIM3/ACTG1/DPYSL3/PALLD/ACTR2/FLNA/PPP1R12C/LPP/PDLIM7/TMOD3/BIN2/ARPC5/PPP1R12B/SEPTIN2/CRYAB/SVIL/SEPTIN9/HSPB7/NCKAP1/ACTN2/NPM3/ADD1/HNRNPK/LSP1/IQGAP1/MYH9/LMOD1/CAPN2/D…
GO:0040011	BP	GO:0040011	locomotion	258	0.345827249798295	1.65338288886744	5.62449200517006e-06	0.00148786561843432	0.00142131899723631	399	tags=21%, list=13%, signal=20%	RHOB/S100A12/FLNA/S100A9/TPM1/S100A11/CDC42/LMNA/AZU1/ELANE/CAVIN1/MYLK/POSTN/MMP9/ANXA1/PARVA/CLIC4/HSPB1/CNN2/APOA1/DDT/RRAS/ARHGDIB/BSG/GLIPR2/VCL/PDCD6/MIEN1/ACTA2/ITGA5/HDAC7/CD9/GPLD1/NEXN/GPI/MAP2K2/COL3A1/S100A4/ACTG1/LAMA4/DPYSL3/COL1A1/CD47/FLNA/CPNE3/LGALS9/FN1/SBDS/GRN/CD151/ATP2B4/FES/MAPK14/COL6A1/BIN2
GO:0050832	BP	GO:0050832	defense response to fungus	15	0.819458728832595	2.31198853465294	6.99814517926013e-06	0.00179152516589059	0.00171139699765812	93	tags=47%, list=3%, signal=45%	ARG1/S100A12/S100A9/ELANE/LTF/MPO/COTL1
GO:0006412	BP	GO:0006412	translation	266	-0.440676956089683	-1.75619547467173	8.33575501908394e-06	0.00206726724473282	0.00197480617261324	882	tags=37%, list=29%, signal=29%	RPL8/RPL7A/YARS2/EIF4B/RPS15A/EEFSEC/BZW2/RPL18/EEF1A2/IARS1/EIF1AD/EIF5/RPS25/FARSA/TCOF1/RPS14/FXR2/OGT/RPS10/AIMP2/ELAVL1/EEF1A1/TPR/SYNCRIP/GCN1/APEH/MRPL13/RPS4X/RPS17/DRG2/GEMIN5/LARS1/RPS21/RPL24/FXR1/MRPL2/CNOT2/GTPBP1/CSDE1/HNRNPD/RPL22L1/MRPS27/RPL31/RPL13/RPL35/RPS23/EIF2B3/SHMT1/EIF3I/NEMF/EEF1B2/RPL3/NIBAN1/EPRS1/CSNK2A1/EIF3A/CNOT1/RPL4/RPL23/RPL26/MRPL38/RBM8A/MRPS34/RPL19/RPS19/RP…
GO:0016071	BP	GO:0016071	mRNA metabolic process	240	-0.451688497199773	-1.78717376383864	9.24688036734472e-06	0.00222373462409842	0.00212427535584104	736	tags=34%, list=24%, signal=28%	RALY/ZC3H13/RBM14/SRSF1/ELAVL1/CDC73/SYNCRIP/DDX46/GEMIN5/MOV10/FXR1/SNRPF/DDX42/CDC40/SRSF7/CRNKL1/PPP1R8/SRSF3/HNRNPAB/SNRNP200/MTPAP/CNOT2/GTPBP1/CSDE1/HNRNPD/HNRNPM/CPSF7/SDE2/DHX34/SRSF10/CDC5L/EFTUD2/TAF15/DDX17/PRMT9/SMU1/DDX47/SNRPD3/PPIL2/SCAF8/HNRNPA2B1/SRSF5/VIRMA/CNOT1/U2AF2/RBM10/DDX23/SRSF2/SRSF6/ZNF326/PRPF4/RBM8A/XRN2/RBMX/DNAJB11/SYMPK/RBM39/MTREX/PNN/SNRPG/TRA2B/IGF2BP2/CARHSP1/…
GO:0008307	MF	GO:0008307	structural constituent of muscle	15	0.811184705579407	2.28864453180843	1.07801229406571e-05	0.00251620751932515	0.00240366704082392	245	tags=53%, list=8%, signal=49%	TPM1/MYL9/TPM2/MYL6/SYNM/CSRP1/MYH11/SORBS2/NEXN
GO:0003779	MF	GO:0003779	actin binding	165	0.391742098099106	1.80480632176813	1.13936807565316e-05	0.00258343572810955	0.00246788838521926	617	tags=36%, list=20%, signal=31%	FLNA/TPM1/DSTN/CNN1/TPM2/INF2/PDLIM7/TAGLN/FLNC/MYLK/GC/SORBS1/TWF1/COTL1/CFL2/PARVA/CAPG/CFL1/MARCKS/CNN2/SORBS1/SYNPO2/MYH11/VCL/ABLIM1/ACTN1/MAP1B/CALD1/TWF2/YWHAH/ALDOA/NEXN/TAGLN2/PDLIM3/S100A4/PALLD/ACTR2/FLNA/SNTA1/PDLIM7/P4HB/TMOD3/TLN1/ARPC5/DMD/SVIL/EMD/CAP2/ACTN2/ADD1/LSP1/IQGAP1/MYH9/LMOD1/TNS1/DIAPH1/SSH3/MICALL2/MYH11/FLII/CAPZB/SYNPO
GO:0099159	BP	GO:0099159	regulation of modification of postsynaptic structure	3	0.99256266759398	1.72301254128907	1.2255480357372e-05	0.00270165255878068	0.00258081782262554	24	tags=67%, list=1%, signal=66%	RHOB/CDC42
GO:0009888	BP	GO:0009888	tissue development	346	0.30933045741587	1.55091301829436	1.32666266556735e-05	0.00284551213890338	0.00271824310595051	524	tags=28%, list=17%, signal=26%	RHOB/PLOD1/FLNA/TPM1/CDC42/LOXL2/LMNA/FNDC3A/LTF/CREB1/TAGLN/MYL6/MYLK/POSTN/CSRP1/PGM5/ALOX15/MMP9/ALDOC/ACTA1/COL2A1/ANXA1/CHI3L1/CFL2/AHSG/CLIC4/MARCKS/TGM2/LTA4H/MYH11/LAMC1/BSG/ISG15/GLIPR2/NME2/VCL/SORBS2/PDCD6/MCRIP1/ACTA2/ITGA5/PTER/SPP1/MAP1B/COL14A1/TUBB/FKBP1A/GPLD1/TGM3/PBXIP1/RAP1B/GPI/TCIRG1/MAP2K2/COL3A1/TAGLN2/S100A4/ACTG1/PELO/COL1A1/STAT6/PALLD/ITGA7/TMEM119/GPX1/FLNA/FN1/SBDS/P…
GO:0043043	BP	GO:0043043	peptide biosynthetic process	272	-0.427605727531282	-1.70622545501414	1.38479410264894e-05	0.00289203315753209	0.00276268341475835	882	tags=36%, list=29%, signal=28%	RPL8/RPL7A/YARS2/EIF4B/RPS15A/EEFSEC/BZW2/RPL18/EEF1A2/IARS1/EIF1AD/EIF5/RPS25/FARSA/TCOF1/RPS14/FXR2/OGT/RPS10/AIMP2/ELAVL1/LGALS4/EEF1A1/TPR/SYNCRIP/GCN1/APEH/MRPL13/RPS4X/RPS17/DRG2/GEMIN5/LARS1/RPS21/RPL24/FXR1/MRPL2/CNOT2/GTPBP1/CSDE1/HNRNPD/RPL22L1/MRPS27/RPL31/RPL13/RPL35/RPS23/EIF2B3/SHMT1/EIF3I/NEMF/EEF1B2/RPL3/NIBAN1/EPRS1/CSNK2A1/EIF3A/CNOT1/RPL4/RPL23/RPL26/MRPL38/RBM8A/MRPS34/RPL19/R…
GO:1903311	BP	GO:1903311	regulation of mRNA metabolic process	107	-0.542968998228825	-1.96666552100263	1.79531847296546e-05	0.00356191185036348	0.00340260095849928	567	tags=31%, list=18%, signal=26%	SRSF3/HNRNPAB/CNOT2/GTPBP1/CSDE1/HNRNPD/DHX34/SRSF10/TAF15/DDX17/SMU1/HNRNPA2B1/CNOT1/U2AF2/RBM10/SRSF2/SRSF6/RBM8A/RBMX/RBM39/TRA2B/IGF2BP2/CARHSP1/SNRNP70/SAFB2/RBM3/SRSF4/CASC3/SUPT6H/MYD88/CELF2/SLTM/ALKBH5
GO:0099080	CC	GO:0099080	supramolecular complex	370	0.303204539396549	1.53402116713502	1.78793281301017e-05	0.00356191185036348	0.00340260095849928	533	tags=27%, list=17%, signal=25%	FLNA/TPM1/DES/MYL9/CDC42/TPM2/LMNA/INF2/COL6A3/PDLIM7/MX1/CLIP1/FLNC/LIMD1/SYNM/CSRP1/PGM5/MAP7/GOLGA2/ACTA1/COL2A1/ANXA1/TWF1/COTL1/CFL2/PARVA/CENPV/HSPB1/TBCA/SYNPO2/MYH11/BAG3/MX1/GFAP/NME2/VCL/SORBS2/CLIP2/MCRIP1/TBCB/ACTA2/ACTN1/SUMO3/MAP1B/GIGYF2/TUBB/CHMP4B/FKBP1A/CALD1/PPP1R12A/SERPINB1/TWF2/ALDOA/PBXIP1/TRIM21/SARM1/RMDN1/NEXN/COL6A3/MAP2K2/COL3A1/TUBB6/FMR1/PDLIM3/ACTG1/CCT3/RPLP0/DPYSL…
GO:0005925	CC	GO:0005925	focal adhesion	230	0.3435320853211	1.66322386126225	2.18900852712305e-05	0.00423706626128013	0.00404755825734023	553	tags=29%, list=18%, signal=26%	RHOB/FLNA/CDC42/CNN1/PDLIM7/TES/FLNC/LIMD1/CSRP1/PGM5/SORBS1/ANXA1/TWF1/ZYX/PARVA/HSPB1/CFL1/MARCKS/TGM2/CNN2/SORBS1/RRAS/SYNPO2/BSG/VCL/SORBS2/ITGA5/ACTN1/CD9/PPP1R12A/RPL27/NEXN/YWHAQ/MAP2K2/ACTG1/RPLP0/PALLD/ACTR2/FLNA/YWHAG/CPNE3/MDC1/LPP/PDLIM7/CD151/P4HB/YWHAZ/RSU1/FES/ANXA6/TLN1/ARPC5/SORBS3/SVIL/NCKAP1/PDIA3/PPP1CB/ACTN2/RAB10/ADD1/HNRNPK/IQGAP1/MYH9/AKAP12/RPS3A/LAP3/RPL13A/TNS1/CAPN2
GO:0040017	BP	GO:0040017	positive regulation of locomotion	138	0.396366942862192	1.79289896200369	2.54302722057213e-05	0.0048051104815382	0.00459019600064173	363	tags=22%, list=12%, signal=20%	RHOB/FLNA/S100A11/CDC42/AZU1/CAVIN1/MYLK/POSTN/MMP9/ANXA1/HSPB1/RRAS/GLIPR2/PDCD6/MIEN1/ACTA2/ITGA5/HDAC7/GPLD1/GPI/MAP2K2/ACTG1/COL1A1/CD47/FLNA/CPNE3/LGALS9/FN1/GRN/CD151
GO:0048306	MF	GO:0048306	calcium-dependent protein binding	30	0.655550746501902	2.21915707898487	2.73493678242878e-05	0.00504754844310576	0.00482179062596133	161	tags=33%, list=5%, signal=32%	S100A12/S100A9/S100A2/S100A11/S100A6/FCN2/CD177/ANXA1/WFS1/PDCD6
GO:0010595	BP	GO:0010595	positive regulation of endothelial cell migration	27	0.677452085154646	2.24147320590353	3.26100395951186e-05	0.00570075092672605	0.00544577782447488	251	tags=30%, list=8%, signal=27%	RHOB/ANXA1/HSPB1/RRAS/PDCD6/HDAC7/GPLD1/GPI
GO:0061061	BP	GO:0061061	muscle structure development	133	0.401585756411615	1.7954193547733	3.1758709580232e-05	0.00570075092672605	0.00544577782447488	533	tags=36%, list=17%, signal=31%	TPM1/DES/MYL9/LMNA/COL6A3/PDLIM7/CREB1/TAGLN/MYL6/FLNC/MYLK/CSRP1/PGM5/ACTA1/CFL2/MYH11/LAMC1/LGALS1/SORBS2/ACTN1/COL14A1/FKBP1A/CD9/COL6A3/COL3A1/PDLIM3/ACTG1/ITGA7/TMEM119/GPX1/PDLIM7/MAPK14/COL6A1/TMOD3/DMD/SMARCB1/ATP2A2/CRYAB/SVIL/PRKG1/EMD/ACTN2/ACADM/SOD2/LAMB1/PDCD4/TGFB1/NIBAN2/MYH9/LMOD1
GO:0048646	BP	GO:0048646	anatomical structure formation involved in morphogenesis	215	0.341905076214859	1.63985892155841	3.30436671660028e-05	0.00570075092672605	0.00544577782447488	396	tags=24%, list=13%, signal=22%	RHOB/FLNA/TPM1/MYL9/CDC42/LOXL2/FLNC/CSRP1/PGM5/MMP9/ACTA1/COL2A1/ANXA1/CHI3L1/CFL2/PARVA/CLIC4/HSPB1/TGM2/RRAS/MYH11/BSG/PDCD6/ITGA5/ACTN1/HDAC7/HSPB6/FKBP1A/CALD1/CD9/VPS33A/GPLD1/HERC1/GPI/TCIRG1/MAP2K2/COL3A1/ACTG1/ERAP1/COL1A1/ITGA7/GPX1/CD47/FLNA/FN1/PGK1/GRN/COL15A1/ATP2B4/MAPK14/COL6A1/TMOD3
GO:0030055	CC	GO:0030055	cell-substrate junction	234	0.336772634229566	1.63005943291816	3.88916758518097e-05	0.00656690084170132	0.0062731881183591	553	tags=29%, list=18%, signal=26%	RHOB/FLNA/CDC42/CNN1/PDLIM7/TES/FLNC/LIMD1/CSRP1/PGM5/SORBS1/ANXA1/TWF1/ZYX/PARVA/HSPB1/CFL1/MARCKS/TGM2/CNN2/SORBS1/RRAS/SYNPO2/BSG/VCL/SORBS2/ITGA5/ACTN1/CD9/PPP1R12A/RPL27/NEXN/YWHAQ/MAP2K2/ACTG1/RPLP0/PALLD/ACTR2/FLNA/YWHAG/CPNE3/MDC1/LPP/PDLIM7/CD151/P4HB/YWHAZ/RSU1/FES/ANXA6/TLN1/ARPC5/SORBS3/DMD/SVIL/NCKAP1/PDIA3/PPP1CB/ACTN2/RAB10/ADD1/HNRNPK/IQGAP1/MYH9/AKAP12/RPS3A/LAP3/RPL13A/TNS1/CAPN2
GO:0055001	BP	GO:0055001	muscle cell development	47	0.554048563399794	2.09826216568643	4.15666884949719e-05	0.00687235916450202	0.00656498444168394	533	tags=45%, list=17%, signal=38%	TPM1/MYL9/LMNA/FLNC/CSRP1/PGM5/ACTA1/CFL2/MYH11/SORBS2/ACTN1/COL14A1/ACTG1/GPX1/COL6A1/TMOD3/DMD/ATP2A2/PRKG1/ACTN2/NIBAN2/LMOD1
GO:0051146	BP	GO:0051146	striated muscle cell differentiation	58	0.520814983670777	2.03509559826031	4.39040517665465e-05	0.00711066438406761	0.0067926311669746	630	tags=48%, list=20%, signal=39%	TPM1/MYL9/LMNA/FLNC/CSRP1/PGM5/ACTA1/CFL2/MYH11/SORBS2/COL14A1/CD9/ACTG1/TMEM119/GPX1/MAPK14/COL6A1/TMOD3/PRKG1/ACTN2/ACADM/TGFB1/NIBAN2/MYH9/LMOD1/CAPN2/MYH11/FLII/EHD2
GO:0003006	BP	GO:0003006	developmental process involved in reproduction	122	-0.509801811330392	-1.88491380213384	4.53503999967219e-05	0.0071980154874797	0.00687607538476613	307	tags=18%, list=10%, signal=17%	MYCBP/MSH2/CASP3/XRN2/BRD2/TRIP13/RRM1/APOB/MTOR/BAK1/FKBP4/CD2AP/MKRN2/SLIRP/PPP1R9B/BCAP31/SAFB2/PARP2/TMED2/FAM50A/PRKDC/ALKBH5
GO:0046629	BP	GO:0046629	gamma-delta T cell activation	6	-0.941003813473213	-1.84676910963049	5.14475472522494e-05	0.00800564186262453	0.00764757967617544	2	tags=33%, list=0%, signal=33%	SYK/ALKBH5
GO:0001525	BP	GO:0001525	angiogenesis	112	0.411878843191249	1.81573588129574	5.60802606145025e-05	0.00827996378141356	0.00790963220948383	524	tags=31%, list=17%, signal=27%	RHOB/FLNA/CDC42/LOXL2/ANXA1/CHI3L1/PARVA/CLIC4/HSPB1/RRAS/BSG/PDCD6/ITGA5/HDAC7/HSPB6/CALD1/GPLD1/ACTG1/ERAP1/GPX1/CD47/FLNA/FN1/PGK1/GRN/COL15A1/ATP2B4/MAPK14/PDCL3/PKM/TGFBI/PTGIS/TGFB1/NIBAN2/MYH9
GO:0007015	BP	GO:0007015	actin filament organization	166	0.368435157925098	1.69495960124496	5.42787501010065e-05	0.00827996378141356	0.00790963220948383	327	tags=20%, list=11%, signal=19%	RHOB/FLNA/TPM1/CDC42/DSTN/CNN1/TPM2/INF2/ALOX15/SORBS1/ACTA1/TWF1/ZYX/COTL1/CFL2/CAPG/CFL1/MARCKS/CNN2/APOA1/SORBS1/SYNPO2/ELMO3/ACTN1/WASHC5/CALD1/TWF2/ALDOA/TAGLN2/ACTG1/DPYSL3/ACTR2/CD47/FLNA
GO:1990904	CC	GO:1990904	ribonucleoprotein complex	299	-0.408792939392064	-1.64250261503627	5.67222838319599e-05	0.00827996378141356	0.00790963220948383	863	tags=37%, list=28%, signal=30%	HTATSF1/RPS15A/PRKRA/WDR3/EEFSEC/RPL18/RBM12/LSM3/BOP1/RIGI/RPS25/LGALS3/SART1/HNRNPL/DHX37/RPS14/MEPCE/RALY/RBM14/PCBP1/RPS10/SRSF1/GTF3C1/ELAVL1/SYNCRIP/NOB1/MRPL13/RPS4X/RPS17/DDX46/RPS21/RPL24/SNRPF/DDX42/CDC40/MRPL2/CRNKL1/PPP1R8/HNRNPAB/SNRNP200/HNRNPD/RPL22L1/SRP68/MRPS27/HNRNPM/RPL31/RPL13/RPL35/G3BP2/RPS23/CDC5L/EFTUD2/DDX17/EIF3I/RPL3/SMU1/TSR1/EPRS1/SNRPD3/PPIL2/HNRNPA2B1/EIF3A/TOP2B/U…
GO:0006518	BP	GO:0006518	peptide metabolic process	328	-0.402104454101803	-1.62188834391798	5.73838215697764e-05	0.00827996378141356	0.00790963220948383	884	tags=35%, list=29%, signal=28%	GSTA1/RPL8/RPL7A/YARS2/EIF4B/RPS15A/EEFSEC/BZW2/RPL18/EEF1A2/IARS1/EIF1AD/EIF5/RPS25/FARSA/TCOF1/RPS14/FXR2/ETHE1/PCSK1N/OGT/GGA3/RPS10/AIMP2/ELAVL1/LGALS4/EEF1A1/TPR/SYNCRIP/GCN1/APEH/MRPL13/RPS4X/RPS17/DRG2/GEMIN5/LARS1/RPS21/RPL24/FXR1/CTSZ/MRPL2/APOE/CPD/SORL1/RTN1/CNOT2/TPP1/GTPBP1/CSDE1/HNRNPD/RPL22L1/MRPS27/RPL31/RPL13/RPL35/RPS23/EIF2B3/MME/SHMT1/EIF3I/NEMF/EEF1B2/RPL3/NIBAN1/EPRS1/CSNK2A…
GO:0003729	MF	GO:0003729	mRNA binding	141	-0.489714763426767	-1.85050504685105	5.91895522014751e-05	0.00838800511198048	0.00801284125855308	783	tags=38%, list=25%, signal=30%	HNRNPL/RPS14/FXR2/RBM14/PCBP1/SRSF1/RNF40/ELAVL1/TPR/SYNCRIP/DDX21/MRPL13/AUH/GEMIN5/RPL24/FXR1/CDC40/SRSF7/PPP1R8/HNRNPAB/HNRNPD/HNRNPM/CPSF7/RPL35/G3BP2/TAF15/DDX17/SHMT1/SCAF8/HNRNPA2B1/EIF3A/DDX23/RPL26/RBM8A/RBMX/RPS26/CRYZ/SRBD1/LSM14A/RNF20/TRA2B/IGF2BP2/CARHSP1/RPS5/SNRNP70/HNRNPA3/DDX39B/ALYREF/SRSF4/NUDT21/CASC3/EIF4G1/PTBP3/CELF2/MRPL12
GO:0007155	BP	GO:0007155	cell adhesion	318	0.298085151929528	1.50693678268029	6.25833394669278e-05	0.00871335757911471	0.00832364193611844	470	tags=24%, list=15%, signal=23%	RHOB/ARG1/FLNA/S100A9/TPM1/S100A11/MYL9/CDC42/OLFM4/COL6A3/FNDC3A/AZU1/ELANE/POSTN/CSRP1/PGM5/ALOX15/CD177/SORBS1/ANXA1/ZYX/PARVA/HSPB1/TGM2/APOA1/SPON1/SORBS1/RRAS/LAMC1/LGALS1/ATP1B1/NME2/VCL/CLIC1/FGL2/ITGA5/ACTN1/SPP1/COL14A1/CD9/PPP1R12A/PBXIP1/NEXN/COL6A3/COL3A1/ACTG1/LAMA4/COL1A1/PALLD/SPARCL1/ITGA7/CD47/VAMP3/FLNA/LGALS9/FN1/STXBP3/LPP/CD151/COL6A5/COL15A1/P4HB/RSU1/FES/MAPK14/COL6A1/TMOD…
GO:0003723	MF	GO:0003723	RNA binding	677	-0.346195530837608	-1.43625425320391	6.59177135965584e-05	0.00901936163969461	0.00861595958842856	919	tags=34%, list=30%, signal=30%	MATR3/THUMPD1/EBNA1BP2/RPS13/DEK/FUS/HUWE1/SAFB/TNPO1/ADAR/ZBP1/NAP1L1/RPL8/RPL7A/YARS2/EIF4B/RAE1/SON/TBL2/HTATSF1/RPS15A/CCT4/THRAP3/PRKRA/WDR3/EEFSEC/LONP1/RPL18/RBM12/THOC6/MAPRE1/IARS1/EIF1AD/BCLAF1/LSM3/EIF5/BOP1/RIGI/RPS25/LGALS3/POLR2A/FARSA/SART1/UBE2O/HNRNPL/TCOF1/DHX37/CCDC9/RPS14/MEPCE/DCPS/FXR2/KDM1A/ARHGEF1/RALY/ZC3H13/DHX30/RBM14/PCBP1/RPS10/SRSF1/RNF40/ELAVL1/RAN/EEF1A1/TPR/SYNCRI…
GO:0099513	CC	GO:0099513	polymeric cytoskeletal fiber	176	0.370239258774883	1.72796564778298	7.0815680253869e-05	0.0095253091270289	0.00909927795162114	533	tags=29%, list=17%, signal=26%	FLNA/TPM1/DES/TPM2/LMNA/INF2/PDLIM7/MX1/CLIP1/SYNM/MAP7/GOLGA2/ACTA1/ANXA1/TWF1/COTL1/TBCA/MX1/GFAP/NME2/CLIP2/TBCB/ACTN1/MAP1B/TUBB/CHMP4B/TWF2/PBXIP1/SARM1/RMDN1/MAP2K2/TUBB6/PDLIM3/ACTG1/CCT3/DPYSL3/PALLD/FLNA/MAP4/PDLIM7/DPYSL2/EVPL/SVIL/SEPTIN9/NCKAP1/EMD/ACTN2/CALM3/CHMP2A/IQGAP1/TUBA1B/ZNF207/LMOD1
GO:2000147	BP	GO:2000147	positive regulation of cell motility	135	0.386274209356745	1.73639712030274	7.46151803811024e-05	0.00986910119174048	0.00942769349306491	363	tags=21%, list=12%, signal=20%	RHOB/FLNA/S100A11/CDC42/CAVIN1/MYLK/POSTN/MMP9/ANXA1/HSPB1/RRAS/GLIPR2/PDCD6/MIEN1/ACTA2/ITGA5/HDAC7/GPLD1/GPI/MAP2K2/ACTG1/COL1A1/CD47/FLNA/CPNE3/LGALS9/FN1/GRN/CD151
GO:0099503	CC	GO:0099503	secretory vesicle	357	0.292959375270299	1.47496394473154	9.51467556250114e-05	0.0123784369285261	0.0118247961002818	524	tags=25%, list=17%, signal=24%	ARG1/S100A12/S100A9/CLCA1/S100A11/CDC42/OLFM4/FNDC3A/PRTN3/AZU1/ELANE/LTF/CD177/MMP9/ALDOC/MPO/COTL1/CHI3L1/LCN2/AHSG/CLU/CNN2/SLC2A4/AP2A2/APOA1/LTA4H/ALB/WFS1/COPS5/BSG/CYB5R3/SERPINB10/RAB12/NME2/VCL/OSTF1/FGL2/SLC2A3/TXNDC5/ACTN1/STOM/PIGR/TUBB/CD9/SERPINB1/ALDOA/VAT1/RAP1B/GPI/TCIRG1/PRDX6/HK3/PPT1/IDH1/DPYSL3/NFKB1/COMMD9/COL1A1/CSTB/ACTR2/CD47/VAMP3/CPNE3/FN1/STXBP3/GRN/IST1/RAB18/APRT/MAP…
GO:0040012	BP	GO:0040012	regulation of locomotion	223	0.33425129772181	1.61866484655469	0.000101825765949927	0.0130336980415907	0.0124507498535038	385	tags=20%, list=13%, signal=19%	RHOB/FLNA/TPM1/S100A11/CDC42/LMNA/AZU1/ELANE/CAVIN1/MYLK/POSTN/MMP9/ANXA1/CLIC4/HSPB1/CNN2/DDT/RRAS/ARHGDIB/GLIPR2/VCL/PDCD6/MIEN1/ACTA2/ITGA5/HDAC7/CD9/GPLD1/NEXN/GPI/MAP2K2/COL3A1/ACTG1/LAMA4/DPYSL3/COL1A1/CD47/FLNA/CPNE3/LGALS9/FN1/GRN/CD151/ATP2B4/FES
GO:0006405	BP	GO:0006405	RNA export from nucleus	43	-0.671101893952793	-2.14863272606543	0.000105568802389359	0.0130905314962805	0.0125050413619764	82	tags=12%, list=3%, signal=11%	DDX39B/ALYREF/CASC3/SUPT6H/ALKBH5
GO:0070988	BP	GO:0070988	demethylation	10	-0.894253847729998	-2.06429046218577	0.000104653099875639	0.0130905314962805	0.0125050413619764	2	tags=20%, list=0%, signal=20%	HNRNPAB/ALKBH5
GO:0031032	BP	GO:0031032	actomyosin structure organization	60	0.502439743255566	2.00033586627629	0.000109355889375117	0.0133515128935527	0.0127543500450136	131	tags=23%, list=4%, signal=23%	TPM1/MYL9/CDC42/CNN1/FLNC/CSRP1/PGM5/SORBS1/ACTA1/ZYX/CFL2/CNN2/APOA1/SORBS1/MYH11
GO:0010634	BP	GO:0010634	positive regulation of epithelial cell migration	42	0.572879150749229	2.11444250473296	0.00011720821256677	0.0140933996201498	0.0134630549745754	251	tags=24%, list=8%, signal=22%	RHOB/MMP9/ANXA1/HSPB1/RRAS/GLIPR2/PDCD6/HDAC7/GPLD1/GPI
GO:0042383	CC	GO:0042383	sarcolemma	45	0.553199158678747	2.06217249272884	0.000155946971326836	0.0181999288889672	0.0173859146671187	445	tags=43%, list=14%, signal=38%	DES/COL6A3/SLMAP/FLNC/SYNM/PGM5/ANXA1/SLC2A4/BSG/ATP1B1/VCL/COL6A3/SNTA1/ATP2B4/COL6A1/ANXA6/DMD/BGN/ATP1A2/PRKG1
GO:2000145	BP	GO:2000145	regulation of cell motility	219	0.327439950625623	1.57748064120687	0.000155863469143921	0.0181999288889672	0.0173859146671187	385	tags=20%, list=13%, signal=19%	RHOB/FLNA/TPM1/S100A11/CDC42/LMNA/ELANE/CAVIN1/MYLK/POSTN/MMP9/ANXA1/CLIC4/HSPB1/CNN2/DDT/RRAS/ARHGDIB/GLIPR2/VCL/PDCD6/MIEN1/ACTA2/ITGA5/HDAC7/CD9/GPLD1/NEXN/GPI/MAP2K2/COL3A1/ACTG1/LAMA4/DPYSL3/COL1A1/CD47/FLNA/CPNE3/LGALS9/FN1/GRN/CD151/ATP2B4/FES
GO:0030141	CC	GO:0030141	secretory granule	326	0.295130977395693	1.48914044456372	0.000164069261712941	0.0188703429123753	0.0180263435981174	524	tags=26%, list=17%, signal=24%	ARG1/S100A12/S100A9/CLCA1/S100A11/CDC42/OLFM4/FNDC3A/PRTN3/AZU1/ELANE/LTF/CD177/MMP9/ALDOC/MPO/COTL1/CHI3L1/LCN2/AHSG/CLU/CNN2/SLC2A4/AP2A2/APOA1/LTA4H/ALB/WFS1/BSG/CYB5R3/SERPINB10/NME2/VCL/OSTF1/FGL2/SLC2A3/TXNDC5/ACTN1/STOM/PIGR/TUBB/CD9/SERPINB1/ALDOA/VAT1/RAP1B/GPI/TCIRG1/PRDX6/HK3/IDH1/NFKB1/COMMD9/COL1A1/CSTB/ACTR2/CD47/VAMP3/CPNE3/FN1/STXBP3/GRN/IST1/RAB18/APRT/MAPK14/BIN2/ARPC5/GLB1/GNS/…
GO:0043603	BP	GO:0043603	amide metabolic process	391	-0.37516062071899	-1.52906743549193	0.00016666941003133	0.0188955491144091	0.018050422421739	885	tags=33%, list=29%, signal=27%	AMDHD2/GSTA1/RPL8/RPL7A/YARS2/EIF4B/RPS15A/EEFSEC/BZW2/RPL18/EEF1A2/IARS1/EIF1AD/EIF5/RPS25/FARSA/ACAT1/TCOF1/ASL/RPS14/FXR2/ETHE1/PCSK1N/OGT/GGA3/RPS10/SMPD2/AIMP2/ELAVL1/LGALS4/EEF1A1/TPR/SYNCRIP/GCN1/APEH/MRPL13/RPS4X/RPS17/DRG2/GEMIN5/LARS1/RPS21/RPL24/FXR1/CTSZ/ASNS/PDHA1/MRPL2/APOE/CPD/ACSF2/SORL1/RTN1/CNOT2/TPP1/GTPBP1/CSDE1/HNRNPD/SPTLC1/RPL22L1/MRPS27/RPL31/RPL13/ACSS1/RPL35/NEU1/RPS23/E…
GO:0018105	BP	GO:0018105	peptidyl-serine phosphorylation	58	-0.606333813139427	-2.03451169407569	0.000179252789216557	0.0194869881537342	0.0186154086220281	304	tags=28%, list=10%, signal=25%	AKAP9/GRK2/MTOR/STK38L/BAK1/CAV1/PRKCB/DOCK7/NCK1/ARAF/MAP4K1/MIF/AKT2/EIF4G1/PRKDC/RPS6KA5
GO:0007283	BP	GO:0007283	spermatogenesis	65	-0.587012182771656	-2.00038922356132	0.000176942830592633	0.0194869881537342	0.0186154086220281	307	tags=15%, list=10%, signal=14%	MYCBP/XRN2/BRD2/TRIP13/APOB/MKRN2/SLIRP/BCAP31/FAM50A/ALKBH5
GO:0048232	BP	GO:0048232	male gamete generation	65	-0.587012182771656	-2.00038922356132	0.000176942830592633	0.0194869881537342	0.0186154086220281	307	tags=15%, list=10%, signal=14%	MYCBP/XRN2/BRD2/TRIP13/APOB/MKRN2/SLIRP/BCAP31/FAM50A/ALKBH5
GO:0010594	BP	GO:0010594	regulation of endothelial cell migration	39	0.553084535731783	1.98258881481484	0.00019462377900042	0.0203228198703597	0.0194138567363023	378	tags=26%, list=12%, signal=23%	RHOB/ANXA1/HSPB1/RRAS/PDCD6/HDAC7/GPLD1/GPI/GRN/ATP2B4
GO:0043604	BP	GO:0043604	amide biosynthetic process	304	-0.404979624679462	-1.62873718093773	0.000190544034186168	0.0203228198703597	0.0194138567363023	882	tags=35%, list=29%, signal=28%	RPL8/RPL7A/YARS2/EIF4B/RPS15A/EEFSEC/BZW2/RPL18/EEF1A2/IARS1/EIF1AD/EIF5/RPS25/FARSA/ACAT1/TCOF1/ASL/RPS14/FXR2/OGT/RPS10/SMPD2/AIMP2/ELAVL1/LGALS4/EEF1A1/TPR/SYNCRIP/GCN1/APEH/MRPL13/RPS4X/RPS17/DRG2/GEMIN5/LARS1/RPS21/RPL24/FXR1/ASNS/PDHA1/MRPL2/CNOT2/GTPBP1/CSDE1/HNRNPD/SPTLC1/RPL22L1/MRPS27/RPL31/RPL13/ACSS1/RPL35/RPS23/EIF2B3/SHMT1/EIF3I/NEMF/EEF1B2/RPL3/NIBAN1/EPRS1/CSNK2A1/EIF3A/CNOT1/RPL4…
GO:0016070	BP	GO:0016070	RNA metabolic process	729	-0.336668574580489	-1.39907952971088	0.000194104977426893	0.0203228198703597	0.0194138567363023	738	tags=27%, list=24%, signal=27%	OGT/RALY/ZC3H13/RBM14/PCBP1/CHD4/SRSF1/GTF3C1/TRMT112/RNF40/ELAVL1/CDC73/TPR/SYNCRIP/TRIM25/DDRGK1/DDX21/NOB1/NDUFA13/RPS17/ARHGEF2/DDX46/LRRFIP2/ANXA4/GEMIN5/LARS1/RPS21/SERPINF2/MOV10/FXR1/FOXK1/SNRPF/ITGA6/DDX42/MAFG/CHD3/DHRS7B/CDC40/APOE/SRSF7/ADRM1/PELP1/WNK1/FBP1/CRNKL1/PPP1R8/PLCG2/NFYC/ADNP/SRSF3/HNRNPAB/SNRNP200/GATAD2B/MTPAP/CDK1/CNOT2/CTBP1/GTPBP1/CSDE1/HNRNPD/HNRNPM/CPSF7/LMO7/CDK5/S…
GO:0007276	BP	GO:0007276	gamete generation	83	-0.544924411182037	-1.91717372141995	0.00020644943628562	0.0212776977449699	0.0203260265226116	307	tags=16%, list=10%, signal=14%	MYCBP/MSH2/XRN2/BRD2/TRIP13/APOB/MTOR/MKRN2/SLIRP/BCAP31/SPIN1/FAM50A/ALKBH5
GO:0030239	BP	GO:0030239	myofibril assembly	17	0.725398333847782	2.12687321792697	0.000217823477657821	0.0216080889836559	0.0206416406064688	740	tags=89%, list=24%, signal=68%	TPM1/MYL9/FLNC/CSRP1/PGM5/ACTA1/CFL2/MYH11/ACTG1/TMOD3/ACTN2/LMOD1/MYH11/FLII/WDR1/ITGB1/TPM1
GO:0055002	BP	GO:0055002	striated muscle cell development	17	0.725398333847782	2.12687321792697	0.000217823477657821	0.0216080889836559	0.0206416406064688	740	tags=89%, list=24%, signal=68%	TPM1/MYL9/FLNC/CSRP1/PGM5/ACTA1/CFL2/MYH11/ACTG1/TMOD3/ACTN2/LMOD1/MYH11/FLII/WDR1/ITGB1/TPM1
GO:0005840	CC	GO:0005840	ribosome	119	-0.497522978515024	-1.82989040220885	0.000212769078643722	0.0216080889836559	0.0206416406064688	723	tags=38%, list=24%, signal=30%	RPS10/EEF1A1/GCN1/MRPL13/RPS4X/RPS17/RPS21/RPL24/FXR1/MRPL2/RPL22L1/SRP68/MRPS27/RPL31/RPL13/RPL35/RPS23/NEMF/RPL3/RPL4/RPL23/RPL26/MRPL38/MRPS34/RPL19/RPS19/RPS26/MRPL3/RPL15/MRPS18B/NCK1/MRPL37/RPS5/MRPL43/RPS29/MRPL40/RPL32/RBM3/MRPL45/RPS27L/MRPL22/EIF4G1/MRPL11/RPL26L1/MRPL12
GO:0008380	BP	GO:0008380	RNA splicing	169	-0.453969438725524	-1.7486205399874	0.000232740350260644	0.022802807650228	0.0217829240100995	869	tags=42%, list=28%, signal=32%	SON/HTATSF1/THRAP3/RBM12/THOC6/LSM3/LGALS3/POLR2A/SART1/HNRNPL/DCPS/RALY/ZC3H13/RBM14/SRSF1/SYNCRIP/DDX46/GEMIN5/SNRPF/DDX42/CDC40/SRSF7/CRNKL1/PPP1R8/SRSF3/SNRNP200/HNRNPM/SDE2/SRSF10/CDC5L/EFTUD2/TAF15/DDX17/SMU1/DDX47/SNRPD3/PPIL2/HNRNPA2B1/SRSF5/VIRMA/U2AF2/RBM10/DDX23/SRSF2/SRSF6/ZNF326/PRPF4/RBM8A/RBMX/RBM39/RPS26/MTREX/PNN/SNRPG/TRA2B/RBM12B/PPP1R9B/SNRNP70/HNRNPA3/DDX39B/RBM22/RBM3/BCAS2/…
GO:0032451	MF	GO:0032451	demethylase activity	4	-0.963768975276548	-1.70786896078552	0.000251964025669326	0.0243852013135582	0.0232945431690692	2	tags=50%, list=0%, signal=50%	KDM1A/ALKBH5
GO:0034116	BP	GO:0034116	positive regulation of heterotypic cell-cell adhesion	5	-0.932979636640844	-1.74687283516326	0.000264536399334201	0.0252935043989906	0.0241622212809755	124	tags=60%, list=4%, signal=58%	FGG/FGB/FGA
GO:0031983	CC	GO:0031983	vesicle lumen	189	0.329660208835283	1.54203691758519	0.000289513033715923	0.0267159934368554	0.0255210877456803	521	tags=29%, list=17%, signal=26%	ARG1/S100A12/S100A9/S100A11/OLFM4/PRTN3/AZU1/ELANE/LTF/ALDOC/MPO/COTL1/CHI3L1/LCN2/AHSG/CLU/CNN2/APOA1/ALB/CYB5R3/NME2/VCL/OSTF1/TXNDC5/ACTN1/TUBB/SERPINB1/ALDOA/VAT1/GPI/PRDX6/HK3/IDH1/NFKB1/COMMD9/CSTB/ACTR2/FN1/GRN/IST1/APRT/MAPK14/BIN2/ARPC5/GLB1/GNS/SCCPDH/PKM/PGLYRP1/ACTN2/PSMB7/NIT2/TGFB1/RAB27A/PSMA5/TTR
GO:0034774	CC	GO:0034774	secretory granule lumen	189	0.329660208835283	1.54203691758519	0.000289513033715923	0.0267159934368554	0.0255210877456803	521	tags=29%, list=17%, signal=26%	ARG1/S100A12/S100A9/S100A11/OLFM4/PRTN3/AZU1/ELANE/LTF/ALDOC/MPO/COTL1/CHI3L1/LCN2/AHSG/CLU/CNN2/APOA1/ALB/CYB5R3/NME2/VCL/OSTF1/TXNDC5/ACTN1/TUBB/SERPINB1/ALDOA/VAT1/GPI/PRDX6/HK3/IDH1/NFKB1/COMMD9/CSTB/ACTR2/FN1/GRN/IST1/APRT/MAPK14/BIN2/ARPC5/GLB1/GNS/SCCPDH/PKM/PGLYRP1/ACTN2/PSMB7/NIT2/TGFB1/RAB27A/PSMA5/TTR
GO:0060205	CC	GO:0060205	cytoplasmic vesicle lumen	189	0.329660208835283	1.54203691758519	0.000289513033715923	0.0267159934368554	0.0255210877456803	521	tags=29%, list=17%, signal=26%	ARG1/S100A12/S100A9/S100A11/OLFM4/PRTN3/AZU1/ELANE/LTF/ALDOC/MPO/COTL1/CHI3L1/LCN2/AHSG/CLU/CNN2/APOA1/ALB/CYB5R3/NME2/VCL/OSTF1/TXNDC5/ACTN1/TUBB/SERPINB1/ALDOA/VAT1/GPI/PRDX6/HK3/IDH1/NFKB1/COMMD9/CSTB/ACTR2/FN1/GRN/IST1/APRT/MAPK14/BIN2/ARPC5/GLB1/GNS/SCCPDH/PKM/PGLYRP1/ACTN2/PSMB7/NIT2/TGFB1/RAB27A/PSMA5/TTR
GO:0048514	BP	GO:0048514	blood vessel morphogenesis	123	0.389507604516085	1.70283876019271	0.000293396353442891	0.0267631432289975	0.0255661287053321	524	tags=30%, list=17%, signal=26%	RHOB/FLNA/CDC42/LOXL2/MYLK/ANXA1/CHI3L1/PARVA/CLIC4/HSPB1/RRAS/BSG/PDCD6/ITGA5/HDAC7/HSPB6/CALD1/GPLD1/COL3A1/ACTG1/ERAP1/GPX1/CD47/FLNA/FN1/PGK1/GRN/COL15A1/ATP2B4/MAPK14/PDCL3/PKM/TGFBI/PTGIS/TGFB1/NIBAN2/MYH9
GO:0042692	BP	GO:0042692	muscle cell differentiation	78	0.443345836345835	1.83113496828244	0.000308211485549917	0.0277950721514107	0.0265519033364893	630	tags=46%, list=20%, signal=38%	TPM1/MYL9/LMNA/FLNC/CSRP1/PGM5/ACTA1/CFL2/MYH11/LAMC1/SORBS2/ACTN1/COL14A1/CD9/ACTG1/TMEM119/GPX1/MAPK14/COL6A1/TMOD3/DMD/ATP2A2/PRKG1/ACTN2/ACADM/SOD2/LAMB1/PDCD4/TGFB1/NIBAN2/MYH9/LMOD1/CAPN2/NID1/MYH11/FLII/EHD2
GO:0006406	BP	GO:0006406	mRNA export from nucleus	32	-0.716531382165824	-2.17871508630724	0.000328224385404681	0.0292672890176579	0.0279582734912421	82	tags=16%, list=3%, signal=15%	DDX39B/ALYREF/CASC3/SUPT6H/ALKBH5
GO:0030335	BP	GO:0030335	positive regulation of cell migration	129	0.376666842174571	1.66158532417347	0.000409920888791069	0.036145913038288	0.0345292425856524	363	tags=21%, list=12%, signal=19%	RHOB/FLNA/S100A11/CDC42/MYLK/POSTN/MMP9/ANXA1/HSPB1/RRAS/GLIPR2/PDCD6/MIEN1/ACTA2/ITGA5/HDAC7/GPLD1/GPI/ACTG1/COL1A1/CD47/FLNA/CPNE3/LGALS9/FN1/GRN/CD151
GO:0016604	CC	GO:0016604	nuclear body	192	-0.440393073042344	-1.71418914866771	0.000430471190438661	0.0374657176157271	0.0357900172788183	740	tags=34%, list=24%, signal=28%	SMC5/ZC3H13/LPXN/RBM14/PCBP1/SRSF1/TRIM25/DDX46/GEMIN5/LARS1/DDX42/TAB1/DCAF7/CHD3/CDC40/SRSF7/CRNKL1/PPP1R8/SRSF3/GATAD2B/HNRNPM/SDE2/BABAM1/SRSF10/CDC5L/KIF2A/EFTUD2/DDX17/SMU1/SNRPD3/CSNK2A1/HNRNPA2B1/SRSF5/VIRMA/PARG/U2AF2/RBM10/PIN1/SP140/SRSF2/SRSF6/PRPF4/F8A1/RBM8A/YLPM1/SYMPK/BRD2/RBM39/MKI67/MTOR/MTREX/TPP2/PNN/DAXX/TDP2/SMC4/SNRNP70/SAFB2/DDX39B/BCAS2/ALYREF/SRSF4/NUDT21/CASC3/SLTM/ALKB…
GO:0001568	BP	GO:0001568	blood vessel development	139	0.36069661827024	1.64203621400147	0.000434330395746837	0.0374657176157271	0.0357900172788183	524	tags=29%, list=17%, signal=25%	RHOB/FLNA/CDC42/LOXL2/MYLK/ANXA1/CHI3L1/PARVA/CLIC4/HSPB1/RRAS/BSG/PDCD6/ACTA2/ITGA5/HDAC7/HSPB6/CALD1/GPLD1/COL3A1/ACTG1/ERAP1/COL1A1/GPX1/CD47/FLNA/FN1/PGK1/GRN/COL15A1/ATP2B4/MAPK14/PDCL3/SNX17/PKM/TGFBI/PTGIS/AP2B1/TGFB1/NIBAN2/MYH9
GO:0032504	BP	GO:0032504	multicellular organism reproduction	106	-0.507531070865203	-1.84015649958841	0.000455602913143983	0.0387362618060737	0.037003734816339	307	tags=16%, list=10%, signal=15%	MYCBP/MSH2/CASP3/XRN2/BRD2/TRIP13/APOB/MTOR/MKRN2/SLIRP/PPP1R9B/BCAP31/SPIN1/PARP2/TMED2/FAM50A/ALKBH5
GO:0030334	BP	GO:0030334	regulation of cell migration	205	0.327084650284456	1.55633837602928	0.0004588216494167	0.0387362618060737	0.037003734816339	378	tags=20%, list=12%, signal=19%	RHOB/FLNA/TPM1/S100A11/CDC42/LMNA/ELANE/MYLK/POSTN/MMP9/ANXA1/CLIC4/HSPB1/CNN2/DDT/RRAS/ARHGDIB/GLIPR2/VCL/PDCD6/MIEN1/ACTA2/ITGA5/HDAC7/CD9/GPLD1/NEXN/GPI/COL3A1/ACTG1/LAMA4/DPYSL3/COL1A1/CD47/FLNA/CPNE3/LGALS9/FN1/GRN/CD151/ATP2B4
GO:0010632	BP	GO:0010632	regulation of epithelial cell migration	59	0.461569441234886	1.82213523308831	0.000485647149284575	0.0397329461517772	0.0379558412278623	251	tags=17%, list=8%, signal=16%	RHOB/MMP9/ANXA1/HSPB1/RRAS/GLIPR2/PDCD6/HDAC7/GPLD1/GPI
GO:0000003	BP	GO:0000003	reproduction	201	-0.429866284247485	-1.67500081689325	0.000477131706166885	0.0397329461517772	0.0379558412278623	579	tags=25%, list=19%, signal=22%	BUB3/MFGE8/ADNP/CDK1/CSDE1/CCT3/PLG/CDC27/CTNNB1/SMC2/HVCN1/RAD21/DSG2/HNF4A/SEPTIN1/SLC4A2/TOP2B/FBLN1/MYCBP/RAD50/MSH2/CASP3/XRN2/BRD2/TRIP13/RRM1/APOB/MTOR/BAK1/FKBP4/NCAPD2/CD2AP/IGSF8/EIF4H/MKRN2/SMC4/AMBP/SLIRP/STAG2/PPP1R9B/BCAP31/SPIN1/SAFB2/PARP2/ITGB4/ERCC4/TMED2/FAM50A/PRKDC/PZP/ALKBH5
GO:0072359	BP	GO:0072359	circulatory system development	209	0.327704481870406	1.56743037821111	0.000481100715719397	0.0397329461517772	0.0379558412278623	524	tags=29%, list=17%, signal=26%	RHOB/FLNA/TPM1/CDC42/LOXL2/LMNA/PDLIM7/CREB1/MYLK/COL2A1/ANXA1/CHI3L1/PARVA/CLIC4/HSPB1/RRAS/MYH11/BSG/SORBS2/PDCD6/ACTA2/ITGA5/HDAC7/HSPB6/COL14A1/FKBP1A/CALD1/GPLD1/MAP2K2/COL3A1/PDLIM3/ACTG1/ERAP1/COL1A1/GPX1/CD47/FLNA/FN1/PGK1/PDLIM7/GRN/NXN/COL15A1/ATP2B4/FES/MAPK14/COL6A1/PDCL3/SNX17/PRKG1/HSPB7/PKM/TGFBI/ACTN2/ACADM/PTGIS/SOD2/AP2B1/PDCD4/TGFB1/NIBAN2/MYH9
GO:0140640	MF	GO:0140640	catalytic activity, acting on a nucleic acid	164	-0.459269519453648	-1.75676440138826	0.000517998236944323	0.0418220157333952	0.039951474601007	823	tags=34%, list=27%, signal=26%	IARS1/RIGI/MCM7/POLR2A/FARSA/DHX37/MEPCE/DCPS/DHX30/CHD4/DDX21/NOB1/DDX46/LARS1/MOV10/DDX42/CHD3/WRNIP1/PPP1R8/RECQL/SNRNP200/CNOT2/DHX34/DDX17/DHX40/DDX27/MRM1/EPRS1/DDX47/MCM3/FEN1/TOP2B/CNOT1/MCM4/DDX23/RAD50/EXOG/MSH2/XRN2/RFC4/MTREX/POLD1/ELAC2/POLR2E/TDP2/TRNT1/POLR2K/MYO18A/DNMT1/DDX39B/DDX10/FTSJ3/ERCC4/DARS2/MYD88/ALKBH5
GO:0022414	BP	GO:0022414	reproductive process	198	-0.428381178753254	-1.66628781731939	0.000521721214416094	0.0418220157333952	0.039951474601007	579	tags=25%, list=19%, signal=22%	BUB3/MFGE8/ADNP/CDK1/CSDE1/CCT3/PLG/CDC27/CTNNB1/SMC2/HVCN1/RAD21/DSG2/HNF4A/SEPTIN1/SLC4A2/TOP2B/FBLN1/MYCBP/RAD50/MSH2/CASP3/XRN2/BRD2/TRIP13/RRM1/APOB/MTOR/BAK1/FKBP4/NCAPD2/CD2AP/IGSF8/MKRN2/SMC4/AMBP/SLIRP/STAG2/PPP1R9B/BCAP31/SPIN1/SAFB2/PARP2/ITGB4/ERCC4/TMED2/FAM50A/PRKDC/PZP/ALKBH5
GO:0051254	BP	GO:0051254	positive regulation of RNA metabolic process	288	-0.389037268118841	-1.56119394971131	0.000530989575704546	0.0421393327279127	0.0402545992023593	766	tags=29%, list=25%, signal=24%	MEPCE/DCPS/FXR2/KDM1A/OGT/RBM14/PCBP1/CHD4/SRSF1/TRMT112/RNF40/ELAVL1/CDC73/SYNCRIP/TRIM25/DDRGK1/DDX21/ARHGEF2/SERPINF2/MOV10/FXR1/FOXK1/ITGA6/MAFG/CHD3/APOE/PELP1/WNK1/NFYC/HNRNPAB/GATAD2B/CNOT2/CTBP1/GTPBP1/CSDE1/HNRNPD/LMO7/CTNNB1/CDC5L/TAF15/UBTF/DDX17/PSMC5/HNF4A/FADD/SCAF8/XPC/ARID1A/TOP2B/CNOT1/U2AF2/PIN1/CCNK/CHP2/PLSCR1/MYCBP/CRTC2/MEF2D/RBMX/CDH1/SMARCD1/MTOR/ERBB2/UCHL5/DAXX/PRKCB/TST…
GO:0051168	BP	GO:0051168	nuclear export	68	-0.577929557497586	-1.97514642057894	0.000574604810462537	0.0451491462953534	0.0431297951532172	131	tags=10%, list=4%, signal=10%	WASHC4/DDX39B/RBM22/ALYREF/CASC3/SUPT6H/ALKBH5
GO:0016607	CC	GO:0016607	nuclear speck	118	-0.474266008148848	-1.74249866110785	0.000622390466376952	0.0484244190310538	0.0462585772842808	740	tags=36%, list=24%, signal=29%	SMC5/ZC3H13/LPXN/RBM14/PCBP1/SRSF1/DDX46/DDX42/TAB1/CDC40/SRSF7/CRNKL1/PPP1R8/SRSF3/GATAD2B/SDE2/SRSF10/CDC5L/EFTUD2/DDX17/SMU1/SRSF5/VIRMA/U2AF2/RBM10/PIN1/SRSF2/SRSF6/PRPF4/RBM8A/YLPM1/BRD2/RBM39/MTREX/PNN/SMC4/SNRNP70/DDX39B/BCAS2/ALYREF/SRSF4/CASC3/ALKBH5
GO:0042382	CC	GO:0042382	paraspeckles	7	-0.930600513605867	-1.93845830987416	0.000659360982541061	0.0508028034703482	0.0485305855519747	41	tags=25%, list=1%, signal=25%	NUDT21/ALKBH5
GO:0019953	BP	GO:0019953	sexual reproduction	131	-0.467934003957673	-1.74621543778219	0.000682840381762019	0.0521059737467633	0.0497754699337051	579	tags=24%, list=19%, signal=20%	BUB3/MFGE8/CDK1/CCT3/CDC27/CTNNB1/SMC2/HVCN1/RAD21/SEPTIN1/SLC4A2/TOP2B/MYCBP/RAD50/MSH2/XRN2/BRD2/TRIP13/APOB/MTOR/NCAPD2/IGSF8/EIF4H/MKRN2/SMC4/SLIRP/STAG2/BCAP31/SPIN1/ERCC4/FAM50A/ALKBH5
GO:0048609	BP	GO:0048609	multicellular organismal reproductive process	102	-0.511537968178268	-1.84875036162308	0.000729276944723352	0.0549787961955223	0.0525198018622867	307	tags=16%, list=10%, signal=15%	MYCBP/MSH2/CASP3/XRN2/BRD2/TRIP13/APOB/MTOR/MKRN2/SLIRP/BCAP31/SPIN1/PARP2/TMED2/FAM50A/ALKBH5
GO:0043152	BP	GO:0043152	induction of bacterial agglutination	3	-0.976215631617584	-1.60920315933855	0.000734343799990596	0.0549787961955223	0.0525198018622867	44	tags=67%, list=1%, signal=66%	FGB/FGA
GO:0045907	BP	GO:0045907	positive regulation of vasoconstriction	6	-0.886247627833952	-1.73930723673271	0.000809823647873545	0.0595070413844857	0.0568455157113575	208	tags=67%, list=7%, signal=62%	CAV1/FGG/FGB/FGA
GO:0045935	BP	GO:0045935	positive regulation of nucleobase-containing compound metabolic process	340	-0.368340084747295	-1.48684229950521	0.000807216518774458	0.0595070413844857	0.0568455157113575	766	tags=28%, list=25%, signal=24%	MEPCE/DCPS/FXR2/KDM1A/OGT/RBM14/PCBP1/CHD4/SRSF1/TRMT112/RNF40/ELAVL1/CDC73/SYNCRIP/TRIM25/DDRGK1/DDX21/ARHGEF2/SERPINF2/MOV10/FXR1/FOXK1/ITGA6/MAFG/CHD3/APOE/PELP1/WNK1/NFYC/HNRNPAB/GATAD2B/CDK1/SMCHD1/CNOT2/CTBP1/GTPBP1/CSDE1/HNRNPD/CCT3/LMO7/PDGFRB/BABAM1/CTNNB1/CDC5L/TAF15/UBTF/DDX17/PSMC5/HNF4A/FADD/SCAF8/HNRNPA2B1/XPC/BRCC3/ARID1A/TOP2B/CNOT1/U2AF2/PIN1/CCNK/CHP2/PLSCR1/MYCBP/RAD50/CRTC2/MS…
GO:0002523	BP	GO:0002523	leukocyte migration involved in inflammatory response	3	0.964476053016218	1.67425633602382	0.000862835878033179	0.0628207846612047	0.0600110477411391	45	tags=67%, list=1%, signal=66%	S100A9/ELANE
GO:0050657	BP	GO:0050657	nucleic acid transport	71	-0.540937882928344	-1.85873495525484	0.000904973472744106	0.0641238346401538	0.0612558172058558	154	tags=34%, list=5%, signal=33%	RAE1/NUP37/THOC6/NUP43/NUP107/FXR2/SRSF1/RAN/TPR/FXR1/SRSF7/WNK1/SRSF3/G3BP2/SEC13/HNRNPA2B1/MCM3AP/RBM8A/IGF2BP2/DDX39B/ALYREF/CASC3/SUPT6H/ALKBH5
GO:0050658	BP	GO:0050658	RNA transport	71	-0.540937882928344	-1.85873495525484	0.000904973472744106	0.0641238346401538	0.0612558172058558	154	tags=34%, list=5%, signal=33%	RAE1/NUP37/THOC6/NUP43/NUP107/FXR2/SRSF1/RAN/TPR/FXR1/SRSF7/WNK1/SRSF3/G3BP2/SEC13/HNRNPA2B1/MCM3AP/RBM8A/IGF2BP2/DDX39B/ALYREF/CASC3/SUPT6H/ALKBH5
GO:0051236	BP	GO:0051236	establishment of RNA localization	71	-0.540937882928344	-1.85873495525484	0.000904973472744106	0.0641238346401538	0.0612558172058558	154	tags=34%, list=5%, signal=33%	RAE1/NUP37/THOC6/NUP43/NUP107/FXR2/SRSF1/RAN/TPR/FXR1/SRSF7/WNK1/SRSF3/G3BP2/SEC13/HNRNPA2B1/MCM3AP/RBM8A/IGF2BP2/DDX39B/ALYREF/CASC3/SUPT6H/ALKBH5
GO:0018158	BP	GO:0018158	protein oxidation	4	0.948809343925283	1.77908116495861	0.000920401820116715	0.0646399012782854	0.0617488021283706	114	tags=50%, list=4%, signal=48%	LOXL2/APOA1
GO:0018209	BP	GO:0018209	peptidyl-serine modification	60	-0.592197219518276	-1.98956890676995	0.00102734680938421	0.070895863298027	0.0677249585463167	304	tags=35%, list=10%, signal=32%	WNK1/CDK1/CDK5/POGLUT1/CSNK2A1/AKAP9/GRK2/MTOR/STK38L/BAK1/CAV1/PRKCB/DOCK7/NCK1/ARAF/MAP4K1/MIF/AKT2/EIF4G1/PRKDC/RPS6KA5
GO:0005884	CC	GO:0005884	actin filament	51	0.475280871610142	1.8287982019827	0.00101850592804816	0.070895863298027	0.0677249585463167	358	tags=31%, list=12%, signal=28%	FLNA/TPM1/TPM2/INF2/PDLIM7/ACTA1/ANXA1/TWF1/COTL1/ACTN1/TWF2/PDLIM3/ACTG1/DPYSL3/PALLD/FLNA/PDLIM7
GO:0034614	BP	GO:0034614	cellular response to reactive oxygen species	42	0.526708531118409	1.94403113526771	0.00107745745123828	0.0733152389791702	0.0700361246721116	320	tags=16%, list=10%, signal=15%	RHOB/TPM1/MMP9/MPO/SOD3/STAT6/FABP1
GO:0051495	BP	GO:0051495	positive regulation of cytoskeleton organization	63	0.452192816878351	1.80005055848338	0.00108088242950642	0.0733152389791702	0.0700361246721116	198	tags=18%, list=6%, signal=18%	FLNA/TPM1/CDC42/DSTN/CLIP1/ALOX15/CFL2/APOA1/DRG1/SYNPO2/PFDN2/MAP1B
GO:0009620	BP	GO:0009620	response to fungus	20	0.663021314333876	2.06307208967174	0.00118286967511916	0.0786001971734856	0.0750847066059321	93	tags=35%, list=3%, signal=34%	ARG1/S100A12/S100A9/ELANE/LTF/MPO/COTL1
GO:0070293	BP	GO:0070293	renal absorption	5	-0.906641586865419	-1.69755855018109	0.00118653707369638	0.0786001971734856	0.0750847066059321	125	tags=50%, list=4%, signal=48%	COMT/HBB/HBB
GO:1901566	BP	GO:1901566	organonitrogen compound biosynthetic process	502	-0.344245863642517	-1.41782436055111	0.00118851104597004	0.0786001971734856	0.0750847066059321	716	tags=25%, list=23%, signal=23%	SMPD2/AIMP2/ELAVL1/LGALS4/EEF1A1/TPR/SYNCRIP/GLS/GCN1/APEH/NDUFA13/MRPL13/RPS4X/RPS17/DRG2/GEMIN5/LARS1/RPS21/RPL24/FXR1/DAD1/CSAD/ASNS/PDHA1/DHRS7B/SRM/MRPL2/APOE/PGRMC1/ATP5MF/PLOD2/CNOT2/GTPBP1/CSDE1/HNRNPD/SPTLC1/RPL22L1/MRPS27/SEPHS2/RPL31/RPL13/ACSS1/UCKL1/RPL35/POGLUT1/CTNNB1/RPS23/EIF2B3/CTPS1/SHMT1/CHP1/PPM1B/EIF3I/NEMF/EEF1B2/RPL3/NIBAN1/EPRS1/PYCR3/CSNK2A1/EIF3A/ALDH18A1/CNOT1/SLC51B/H…
GO:0010975	BP	GO:0010975	regulation of neuron projection development	65	0.434283692996728	1.75027795116176	0.00124129543924888	0.0807452508678618	0.0771338201334811	385	tags=29%, list=13%, signal=26%	FLNA/S100A9/TWF1/CFL1/GFAP/NME2/SPP1/MAP1B/WASHC5/TWF2/YWHAH/SARM1/MAP2K2/DPYSL3/FLNA/FN1/GRN/IST1/FES
GO:0010629	BP	GO:0010629	negative regulation of gene expression	253	-0.396820603532469	-1.57620135065407	0.00123569442440448	0.0807452508678618	0.0771338201334811	720	tags=30%, list=23%, signal=25%	CHD4/ELAVL1/RAN/TPR/SYNCRIP/INPP5D/DDRGK1/MRPL13/ANXA4/SERPINF2/MOV10/FXR1/PTPN11/CTSZ/APOE/SRSF7/CHMP1A/ADNP/SRSF3/HNRNPAB/MTPAP/CDK1/SMCHD1/CNOT2/GTPBP1/CSDE1/HNRNPD/SNX12/CTNNB1/DHX34/SRSF10/RAD21/TAF15/DDX17/SHMT1/GIT1/PPM1B/CD22/EPRS1/CSNK2A1/HNRNPA2B1/CNOT1/U2AF2/RBM10/SRSF6/CASP3/RBM8A/XRN2/RBMX/CPNE1/RPS26/BPI/BAK1/CD2AP/AKAP8/CD200/DAXX/LSM14A/UBR5/IGF2BP2/CARHSP1/DNMT1/PC/ERP29/HAT1/GLG…
GO:0044391	CC	GO:0044391	ribosomal subunit	97	-0.494568631606484	-1.77339504711881	0.0012842859127661	0.0821942984170307	0.078518057247381	684	tags=37%, list=22%, signal=30%	MRPL13/RPS4X/RPS17/RPS21/RPL24/MRPL2/MRPS27/RPL31/RPL13/RPL35/RPS23/RPL3/RPL4/RPL23/RPL26/MRPL38/MRPS34/RPL19/RPS19/RPS26/MRPL3/RPL15/MRPS18B/MRPL37/RPS5/MRPL43/RPS29/MRPL40/RPL32/RBM3/MRPL45/RPS27L/MRPL22/MRPL11/RPL26L1/MRPL12
GO:0035578	CC	GO:0035578	azurophil granule lumen	52	0.457330414797309	1.75727137589968	0.00127900752563597	0.0821942984170307	0.078518057247381	415	tags=28%, list=13%, signal=25%	ARG1/PRTN3/AZU1/ELANE/MPO/CYB5R3/TXNDC5/TUBB/VAT1/PRDX6/ACTR2/GRN/IST1/GLB1/GNS
GO:0008333	BP	GO:0008333	endosome to lysosome transport	21	0.639465148516848	1.99765397166731	0.00134804133446842	0.0855844482427311	0.0817565784491921	217	tags=19%, list=7%, signal=18%	RHOB/RAB12/CHMP4B/VPS33A
GO:0070498	BP	GO:0070498	interleukin-1-mediated signaling pathway	8	-0.831754511931718	-1.80397068115604	0.00138098551130218	0.0869801668070958	0.0830898717827759	20	tags=50%, list=1%, signal=50%	RELA/ZBP1/MYD88/RPS6KA5
GO:1902905	BP	GO:1902905	positive regulation of supramolecular fiber organization	63	0.447299731467348	1.78057258183707	0.00139819781975573	0.0873708495872555	0.0834630807947016	470	tags=29%, list=15%, signal=25%	FLNA/TPM1/CDC42/DSTN/CLIP1/ALOX15/CFL2/CLU/APOA1/DRG1/SYNPO2/MAP1B/GPX1/CD47/FLNA/FES/SORBS3/NCKAP1/ACTN2
GO:0051252	BP	GO:0051252	regulation of RNA metabolic process	514	-0.343329155716323	-1.41420027138511	0.00144726453559532	0.0897304012069099	0.0857170985637953	726	tags=26%, list=24%, signal=24%	RBM14/PCBP1/CHD4/SRSF1/TRMT112/RNF40/ELAVL1/CDC73/TPR/SYNCRIP/TRIM25/DDRGK1/DDX21/NDUFA13/ARHGEF2/LRRFIP2/ANXA4/SERPINF2/MOV10/FXR1/FOXK1/ITGA6/MAFG/CHD3/DHRS7B/APOE/SRSF7/PELP1/WNK1/FBP1/PLCG2/NFYC/ADNP/SRSF3/HNRNPAB/GATAD2B/CDK1/CNOT2/CTBP1/GTPBP1/CSDE1/HNRNPD/LMO7/CDK5/CTNNB1/G3BP2/DHX34/SRSF10/CDC5L/RAD21/TAF15/UBTF/DDX17/CHP1/NCOA5/PSMC5/STRN3/HNF4A/SMU1/FADD/SCAF8/HNRNPA2B1/XPC/ARID1A/TOP2B…
GO:0060537	BP	GO:0060537	muscle tissue development	68	0.434563971134018	1.76893769661367	0.00149048766047994	0.0916938765392933	0.0875927550450963	519	tags=38%, list=17%, signal=32%	TPM1/CDC42/LMNA/CREB1/MYL6/MYLK/CSRP1/PGM5/ACTA1/CFL2/MYH11/SORBS2/COL14A1/FKBP1A/COL3A1/GPX1/FES/MAPK14/COL6A1/DMD/SVIL/PRKG1/EMD/ACTN2/ACADM/TGFB1/NIBAN2
GO:0034599	BP	GO:0034599	cellular response to oxidative stress	61	0.440020268203071	1.75204775733745	0.00151087295098637	0.0922329826079063	0.0881077489312051	324	tags=15%, list=11%, signal=13%	RHOB/TPM1/MMP9/MPO/NME2/SOD3/STAT6/FABP1/GPX1
GO:0010608	BP	GO:0010608	post-transcriptional regulation of gene expression	166	-0.423408533533094	-1.62356530402018	0.00157853937029098	0.0956281560506046	0.0913510690625603	775	tags=28%, list=25%, signal=22%	TCOF1/RPS14/DCPS/FXR2/OGT/ELAVL1/RAN/TPR/SYNCRIP/GCN1/MRPL13/RPS4X/GEMIN5/MOV10/FXR1/CNOT2/CSDE1/HNRNPD/MRPS27/TAF15/SHMT1/NIBAN1/EPRS1/CSNK2A1/CNOT1/RBM10/RPL26/RBM8A/MTOR/ERBB2/CAV1/LSM14A/EIF4H/NCK1/IGF2BP2/CARHSP1/PLXNB2/RBM3/RPS27L/NUDT21/TMED2/CASC3/AKT2/EIF4G1/MYD88/PRKDC/ALKBH5
GO:0016706	MF	GO:0016706	2-oxoglutarate-dependent dioxygenase activity	13	-0.763598220667366	-1.8736125372152	0.00160913390357161	0.0967430807480627	0.092416127380564	2	tags=15%, list=0%, signal=15%	PLOD2/ALKBH5
GO:0048729	BP	GO:0048729	tissue morphogenesis	92	0.392376896927243	1.69020179207462	0.00162576450838611	0.0970080235981365	0.0926692203355501	283	tags=17%, list=9%, signal=16%	RHOB/FLNA/TPM1/CDC42/MYLK/ACTA1/CLIC4/TGM2/VCL/ACTA2/ITGA5/FKBP1A/TGM3/GPI/COL3A1/ACTG1
GO:0005721	CC	GO:0005721	pericentric heterochromatin	5	-0.898217441702266	-1.68178552602596	0.00170343388751131	0.100883965158879	0.0963718056390925	206	tags=60%, list=7%, signal=56%	IKZF1/DNMT1/BAZ1A
GO:0051028	BP	GO:0051028	mRNA transport	57	-0.58184580581654	-1.95331565031658	0.00175549316226544	0.1031969906351	0.0985813782037872	154	tags=40%, list=5%, signal=39%	RAE1/NUP37/THOC6/NUP43/NUP107/FXR2/SRSF1/TPR/FXR1/SRSF7/WNK1/SRSF3/G3BP2/SEC13/HNRNPA2B1/MCM3AP/RBM8A/IGF2BP2/DDX39B/ALYREF/CASC3/SUPT6H/ALKBH5
GO:0098685	CC	GO:0098685	Schaffer collateral - CA1 synapse	24	0.615558640524231	1.99744534472397	0.00180189945540937	0.105146132927417	0.100443342707881	24	tags=8%, list=1%, signal=8%	RHOB/CDC42
GO:0000287	MF	GO:0000287	magnesium ion binding	61	-0.532842991507193	-1.79633470232273	0.00181857426388725	0.105344564658461	0.100632899335505	444	tags=33%, list=14%, signal=29%	PPM1B/ENO2/IDH3G/FEN1/PLSCR1/ARF1/SUCLG2/MSH2/PDXP/STK38L/PRPSAP2/TDP2/PDXK/COMT/PRPS1/PRPS2/ILVBL/PPA2/DUT/RPS6KA5
GO:0007266	BP	GO:0007266	Rho protein signal transduction	36	0.51969169447528	1.83532674100181	0.0018613030052404	0.107038410504259	0.102250985840895	266	tags=19%, list=9%, signal=18%	RHOB/CDC42/CFL1/APOA1/ARHGDIB/APOC3/COL3A1
GO:0006401	BP	GO:0006401	RNA catabolic process	86	-0.508939126263001	-1.8027622770041	0.00188095374985294	0.107390280279373	0.102587117807201	583	tags=27%, list=19%, signal=22%	PPP1R8/HNRNPAB/MTPAP/CNOT2/GTPBP1/CSDE1/HNRNPD/DHX34/TAF15/FEN1/CNOT1/RBM10/RBM8A/XRN2/MTREX/ELAC2/IGF2BP2/SLIRP/TRNT1/CARHSP1/CASC3/MYD88/ALKBH5
GO:0014706	BP	GO:0014706	striated muscle tissue development	36	0.518431308422732	1.83087560150734	0.00195359697054065	0.109955642256813	0.105037740812495	509	tags=38%, list=17%, signal=33%	TPM1/CDC42/LMNA/CREB1/PGM5/MYH11/SORBS2/COL14A1/FKBP1A/FES/MAPK14/PRKG1/ACTN2/ACADM/TGFB1
GO:1901532	BP	GO:1901532	regulation of hematopoietic progenitor cell differentiation	5	-0.895641208210698	-1.67696189201861	0.00194042777671078	0.109955642256813	0.105037740812495	41	tags=60%, list=1%, signal=59%	EIF2AK2/NUDT21/PRKDC
GO:0031346	BP	GO:0031346	positive regulation of cell projection organization	72	0.413926625411316	1.67559580954983	0.00198280488875082	0.110813659134694	0.10585738182938	452	tags=27%, list=15%, signal=24%	FLNA/S100A9/CDC42/TWF1/NME2/MIEN1/MAP1B/WASHC5/TWF2/MAP2K2/FMR1/DPYSL3/ACTR2/FLNA/FN1/GRN/IST1/FES/SEPTIN9/NCKAP1
GO:0005200	MF	GO:0005200	structural constituent of cytoskeleton	44	0.50128471409489	1.85137980214968	0.00201291673440872	0.111709840589284	0.106713480465304	411	tags=33%, list=13%, signal=29%	TPM1/DES/LMNA/SYNM/ACTA1/GFAP/SORBS2/TUBB/TUBB6/ACTG1/ACTR2/TLN1/ARPC5/SORBS3/DMD
GO:0018198	BP	GO:0018198	peptidyl-cysteine modification	12	0.726313125054917	1.91519425942785	0.00205007238844207	0.112042293444923	0.107031063957759	550	tags=50%, list=18%, signal=41%	S100A9/SNTA1/ATP2B4/DMD/GAPDH/RAB6A
GO:0099010	BP	GO:0099010	modification of postsynaptic structure	9	0.799052567625977	1.87350387951468	0.00207894664743421	0.112042293444923	0.107031063957759	24	tags=22%, list=1%, signal=22%	RHOB/CDC42
GO:0061013	BP	GO:0061013	regulation of mRNA catabolic process	58	-0.545570106348985	-1.83062322643367	0.00208080846560015	0.112042293444923	0.107031063957759	762	tags=36%, list=25%, signal=28%	DCPS/FXR2/ELAVL1/SYNCRIP/MOV10/FXR1/HNRNPAB/CNOT2/GTPBP1/CSDE1/HNRNPD/DHX34/TAF15/CNOT1/RBM10/RBM8A/IGF2BP2/CARHSP1/CASC3/MYD88/ALKBH5
GO:0140098	MF	GO:0140098	catalytic activity, acting on RNA	116	-0.477162871180179	-1.75297946558844	0.00208949841605955	0.112042293444923	0.107031063957759	823	tags=34%, list=27%, signal=26%	IARS1/RIGI/POLR2A/FARSA/DHX37/MEPCE/DCPS/DHX30/DDX21/NOB1/DDX46/LARS1/MOV10/DDX42/PPP1R8/SNRNP200/CNOT2/DHX34/DDX17/DHX40/DDX27/MRM1/EPRS1/DDX47/FEN1/CNOT1/DDX23/EXOG/XRN2/MTREX/ELAC2/POLR2E/TDP2/TRNT1/POLR2K/DDX39B/DDX10/FTSJ3/DARS2/ALKBH5
GO:0001944	BP	GO:0001944	vasculature development	149	0.335213804068124	1.53370642821881	0.00207843348184186	0.112042293444923	0.107031063957759	524	tags=29%, list=17%, signal=25%	RHOB/FLNA/CDC42/LOXL2/MYLK/ANXA1/CHI3L1/PARVA/CLIC4/HSPB1/RRAS/BSG/PDCD6/ACTA2/ITGA5/HDAC7/HSPB6/CALD1/GPLD1/COL3A1/ACTG1/ERAP1/COL1A1/GPX1/CD47/FLNA/FN1/PGK1/GRN/COL15A1/ATP2B4/MAPK14/PDCL3/SNX17/PKM/TGFBI/PTGIS/SOD2/AP2B1/PDCD4/TGFB1/NIBAN2/MYH9
GO:0045766	BP	GO:0045766	positive regulation of angiogenesis	32	0.550422149127703	1.90608648945268	0.00214602148168795	0.114300848850172	0.109188602692452	481	tags=38%, list=16%, signal=32%	RHOB/CHI3L1/HSPB1/RRAS/PDCD6/ITGA5/HSPB6/ERAP1/GRN/PDCL3/PKM/PTGIS
GO:0000792	CC	GO:0000792	heterochromatin	15	-0.719833741364181	-1.83589568998527	0.00217517046529428	0.114438155659825	0.109319768286033	356	tags=33%, list=12%, signal=30%	TOP2B/WDR76/IKZF1/DNMT1/BAZ1A
GO:0019219	BP	GO:0019219	regulation of nucleobase-containing compound metabolic process	587	-0.331163846786664	-1.37049001487531	0.002177439705725	0.114438155659825	0.109319768286033	740	tags=27%, list=24%, signal=25%	SMC5/OGT/RALY/RBM14/PCBP1/CHD4/SRSF1/TRMT112/RNF40/ELAVL1/CDC73/TPR/SYNCRIP/TRIM25/DDRGK1/DDX21/NDUFA13/ARHGEF2/LRRFIP2/ANXA4/SERPINF2/MOV10/FXR1/FOXK1/ITGA6/MAFG/SMC3/CHD3/DHRS7B/APOE/SRSF7/PELP1/WNK1/FBP1/WRNIP1/PLCG2/NFYC/ADNP/SRSF3/HNRNPAB/GATAD2B/CDK1/SMCHD1/CNOT2/CTBP1/GTPBP1/CSDE1/HNRNPD/CCT3/LMO7/CDK5/PDGFRB/BABAM1/CTNNB1/G3BP2/DHX34/SRSF10/CDC5L/RAD21/TAF15/UBTF/DDX17/GIT1/CHP1/NCOA5/PSM…
GO:0003735	MF	GO:0003735	structural constituent of ribosome	86	-0.505196003093004	-1.78950340005628	0.00221884590215009	0.115847112364889	0.110665707668179	882	tags=47%, list=29%, signal=34%	RPL8/RPL7A/RPS15A/RPL18/RPS25/RPS14/RPS10/MRPL13/RPS4X/RPS17/RPS21/RPL24/MRPL2/RPL22L1/RPL31/RPL13/RPL35/RPS23/RPL3/RPL4/RPL23/RPL26/MRPS34/RPL19/RPS19/RPS26/SRBD1/MRPL3/RPL15/MRPS18B/MRPL37/RPS5/MRPL43/RPS29/RPL32/RPS27L/MRPL22/MRPL11/RPL26L1/MRPL12
GO:0051213	MF	GO:0051213	dioxygenase activity	19	-0.680516918519635	-1.82865533783342	0.0022421737464743	0.116299940209281	0.111098282229844	2	tags=11%, list=0%, signal=11%	PLOD2/ALKBH5
GO:0070161	CC	GO:0070161	anchoring junction	335	0.263807346239248	1.33286873758673	0.00235819729366063	0.121523725470719	0.116088427265508	553	tags=26%, list=18%, signal=24%	RHOB/FLNA/S100A11/DES/CDC42/CNN1/PDLIM7/TES/FLNC/LIMD1/SYNM/CSRP1/PGM5/SORBS1/ANXA1/TWF1/ZYX/PARVA/CLIC4/HSPB1/CFL1/MARCKS/TGM2/CNN2/SORBS1/RRAS/SYNPO2/BSG/ATP1B1/VCL/SORBS2/ITGA5/ACTN1/CD9/PPP1R12A/YWHAH/RPL27/NEXN/RAP1B/YWHAQ/MAP2K2/PDLIM3/ACTG1/RPLP0/PALLD/ACTR2/FLNA/YWHAG/CPNE3/MDC1/LPP/LCP2/SNTA1/PDLIM7/CD151/P4HB/YWHAZ/RSU1/FES/TMOD3/ANXA6/BIN2/TLN1/ARPC5/SORBS3/DMD/EVPL/ATP1A2/SVIL/NCKAP1/…
GO:0045111	CC	GO:0045111	intermediate filament cytoskeleton	26	0.572512859758836	1.88627656699357	0.00244194895813132	0.124235458947392	0.118678875124565	153	tags=23%, list=5%, signal=22%	DES/LMNA/CLIP1/SYNM/GFAP/NME2
GO:0046649	BP	GO:0046649	lymphocyte activation	142	-0.428458990897523	-1.61976543476511	0.00244212847729249	0.124235458947392	0.118678875124565	580	tags=23%, list=19%, signal=20%	PLCG2/ITGA4/SWAP70/SH3KBP1/LAMP1/CTNNB1/CTPS1/FKBP1A/CD22/FADD/SLC4A2/ARID1A/TOP2B/SPTA1/MSH2/CASP3/IGBP1/BRD2/SMARCD1/MTOR/BAK1/CD2AP/ERBB2/CAV1/IKZF1/PRKCB/NCK1/MIF/AP1G1/SUPT6H/MYD88/PRKDC/ALKBH5
GO:2000352	BP	GO:2000352	negative regulation of endothelial cell apoptotic process	5	-0.889414125551337	-1.66530255765295	0.0025625390428452	0.129530635949169	0.123737218817104	124	tags=60%, list=4%, signal=58%	FGG/FGB/FGA
GO:0050779	BP	GO:0050779	RNA destabilization	28	-0.684567305242948	-2.01792737288092	0.00277491862571621	0.134971585293872	0.128934815005102	2	tags=39%, list=0%, signal=40%	DCPS/FXR2/ELAVL1/SYNCRIP/MOV10/FXR1/CNOT2/CSDE1/HNRNPD/CNOT1/ALKBH5
GO:0061157	BP	GO:0061157	mRNA destabilization	28	-0.684567305242948	-2.01792737288092	0.00277491862571621	0.134971585293872	0.128934815005102	2	tags=39%, list=0%, signal=40%	DCPS/FXR2/ELAVL1/SYNCRIP/MOV10/FXR1/CNOT2/CSDE1/HNRNPD/CNOT1/ALKBH5
GO:0045214	BP	GO:0045214	sarcomere organization	9	0.78380080947004	1.83774374403391	0.00277698862349173	0.134971585293872	0.128934815005102	740	tags=90%, list=24%, signal=69%	TPM1/FLNC/CSRP1/CFL2/ACTG1/ACTN2/WDR1/ITGB1/TPM1
GO:0043484	BP	GO:0043484	regulation of RNA splicing	69	-0.533841447453499	-1.83021867374498	0.0027301744002552	0.134971585293872	0.128934815005102	472	tags=32%, list=15%, signal=28%	SRSF10/DDX17/SMU1/HNRNPA2B1/U2AF2/RBM10/SRSF2/SRSF6/ZNF326/RBM8A/RBMX/RBM39/RPS26/TRA2B/RBM12B/SNRNP70/RBM22/RBM3/SRSF4/PTBP3/CELF2/FAM50A
GO:0006403	BP	GO:0006403	RNA localization	88	-0.504197903322402	-1.78667090991726	0.00270713146847263	0.134971585293872	0.128934815005102	82	tags=29%, list=3%, signal=29%	RAE1/CCT4/NUP37/THOC6/NUP43/NUP107/FXR2/SRSF1/RAN/TPR/FXR1/SRSF7/WNK1/SRSF3/CCT3/G3BP2/SEC13/HNRNPA2B1/MCM3AP/RBM8A/IGF2BP2/DDX39B/ALYREF/CASC3/SUPT6H/ALKBH5
GO:0040013	BP	GO:0040013	negative regulation of locomotion	69	0.414495443041359	1.67373873211903	0.00270498940017082	0.134971585293872	0.128934815005102	154	tags=13%, list=5%, signal=12%	RHOB/TPM1/ELANE/CLIC4/CNN2/DDT/RRAS/ARHGDIB/VCL
GO:0051015	MF	GO:0051015	actin filament binding	93	0.373444013181313	1.60597400655184	0.00278923134931893	0.134971585293872	0.128934815005102	327	tags=22%, list=11%, signal=20%	FLNA/TPM1/DSTN/CNN1/TPM2/FLNC/TWF1/COTL1/CFL2/CAPG/CFL1/MARCKS/CNN2/MYH11/ABLIM1/ACTN1/TWF2/NEXN/TAGLN2/ACTR2/FLNA
GO:0034248	BP	GO:0034248	regulation of amide metabolic process	148	-0.437595637664895	-1.66144861660189	0.00285374598438578	0.137256534133852	0.131117566695671	775	tags=30%, list=25%, signal=24%	TCOF1/RPS14/FXR2/OGT/GGA3/ELAVL1/TPR/SYNCRIP/GCN1/MRPL13/RPS4X/GEMIN5/FXR1/APOE/SORL1/RTN1/CNOT2/CSDE1/HNRNPD/MRPS27/SHMT1/NIBAN1/EPRS1/CSNK2A1/CNOT1/PIN1/RPL26/CASP3/RBM8A/MTOR/ERBB2/LSM14A/EIF4H/NCK1/IGF2BP2/PLXNB2/RTN3/RBM3/RPS27L/TMED2/CASC3/AKT2/EIF4G1/PRKDC/ALKBH5
GO:0006417	BP	GO:0006417	regulation of translation	128	-0.455181479293546	-1.69670232728084	0.00287342699117464	0.13737058193953	0.131226513572858	405	tags=30%, list=13%, signal=27%	TCOF1/RPS14/FXR2/OGT/ELAVL1/TPR/SYNCRIP/GCN1/MRPL13/RPS4X/GEMIN5/FXR1/CNOT2/CSDE1/HNRNPD/MRPS27/SHMT1/NIBAN1/EPRS1/CSNK2A1/CNOT1/RPL26/RBM8A/MTOR/ERBB2/LSM14A/EIF4H/NCK1/IGF2BP2/PLXNB2/RBM3/RPS27L/TMED2/CASC3/AKT2/EIF4G1/PRKDC/ALKBH5
GO:0007229	BP	GO:0007229	integrin-mediated signaling pathway	47	0.465138459164856	1.76154672197398	0.00298132906223166	0.141675613400422	0.1353389972026	336	tags=29%, list=11%, signal=26%	FLNA/CDC42/CD177/ZYX/APOA1/LAMC1/ISG15/NME2/ITGA5/COL3A1/ITGA7/CD47/FLNA/FN1
GO:0033138	BP	GO:0033138	positive regulation of peptidyl-serine phosphorylation	16	-0.739643949005297	-1.92522921695746	0.00304965447189618	0.143207443129989	0.136802313961983	304	tags=38%, list=10%, signal=34%	AKAP9/CAV1/DOCK7/ARAF/MIF/EIF4G1
GO:0140053	BP	GO:0140053	mitochondrial gene expression	42	-0.600610026849618	-1.90446036059433	0.00304293611806162	0.143207443129989	0.136802313961983	300	tags=33%, list=10%, signal=30%	MRPL38/MRPS34/ELAC2/MRPL3/MRPS18B/MRPL37/TRNT1/MRPL43/MRPL40/MRPL45/MRPL22/DARS2/MRPL11/MRPL12
GO:0014888	BP	GO:0014888	striated muscle adaptation	8	0.809261492570247	1.85654183043007	0.00307945903410489	0.143756393497979	0.137326711849062	425	tags=50%, list=14%, signal=43%	LMNA/ACTA1/ATP2B4/ATP2A2
GO:1904018	BP	GO:1904018	positive regulation of vasculature development	34	0.534027982019806	1.88336678625816	0.00311971823208723	0.144389593005263	0.137931590728977	509	tags=38%, list=17%, signal=32%	RHOB/CHI3L1/HSPB1/RRAS/PDCD6/ITGA5/HSPB6/ERAP1/GRN/PDCL3/PKM/PTGIS/TGFB1
GO:0006402	BP	GO:0006402	mRNA catabolic process	73	-0.507723578437051	-1.75854724377179	0.00312941154194874	0.144389593005263	0.137931590728977	566	tags=32%, list=18%, signal=26%	DCPS/FXR2/ELAVL1/SYNCRIP/MOV10/FXR1/HNRNPAB/MTPAP/CNOT2/GTPBP1/CSDE1/HNRNPD/DHX34/TAF15/CNOT1/RBM10/RBM8A/XRN2/IGF2BP2/CARHSP1/CASC3/MYD88/ALKBH5
GO:0004536	MF	GO:0004536	DNA nuclease activity	10	-0.760114005506949	-1.75464281839531	0.00331703431806706	0.151287266368852	0.144520757161034	357	tags=50%, list=12%, signal=44%	FEN1/RAD50/EXOG/POLD1/ERCC4
GO:0001975	BP	GO:0001975	response to amphetamine	5	-0.88221283064449	-1.65181914820141	0.00330460950813188	0.151287266368852	0.144520757161034	125	tags=40%, list=4%, signal=38%	COMT/PPP1R9B
GO:0010927	BP	GO:0010927	cellular component assembly involved in morphogenesis	25	0.559267701719404	1.82826673518392	0.0033477084736974	0.1518137968415	0.145023737910188	667	tags=63%, list=22%, signal=50%	TPM1/MYL9/FLNC/CSRP1/PGM5/ACTA1/CFL2/MYH11/CD9/ACTG1/TMOD3/ACTN2/LMOD1/MYH11/FLII/DAG1/WDR1
GO:0051017	BP	GO:0051017	actin filament bundle assembly	55	0.4478430053596	1.75062738257873	0.00345648776790185	0.154975632350673	0.148044156434309	327	tags=25%, list=11%, signal=23%	FLNA/TPM1/CDC42/SORBS1/ZYX/MARCKS/APOA1/SORBS1/SYNPO2/ACTN1/CALD1/ACTG1/DPYSL3/CD47/FLNA
GO:0061572	BP	GO:0061572	actin filament bundle organization	55	0.4478430053596	1.75062738257873	0.00345648776790185	0.154975632350673	0.148044156434309	327	tags=25%, list=11%, signal=23%	FLNA/TPM1/CDC42/SORBS1/ZYX/MARCKS/APOA1/SORBS1/SYNPO2/ACTN1/CALD1/ACTG1/DPYSL3/CD47/FLNA
GO:0019065	BP	GO:0019065	receptor-mediated endocytosis of virus by host cell	5	-0.880747090923299	-1.64907475721815	0.00348323234093228	0.155297369986733	0.14835150395857	208	tags=60%, list=7%, signal=56%	CAV1/CAV2/SIGLEC1
GO:0140693	MF	GO:0140693	molecular condensate scaffold activity	17	-0.737586605236667	-1.94282079039338	0.00352327097030893	0.156204907376378	0.149218450621375	197	tags=18%, list=6%, signal=17%	DAXX/NCK1/ALKBH5
GO:0009451	BP	GO:0009451	RNA modification	37	-0.624120183263591	-1.95160099022628	0.00377748926347658	0.16654530441639	0.15909636067578	412	tags=19%, list=13%, signal=17%	MRM1/SNRPD3/VIRMA/DNAJB11/SNRPG/FTSJ3/ALKBH5
GO:0003008	BP	GO:0003008	system process	285	0.270413308016612	1.31879010161774	0.0039043627489318	0.171187971135485	0.163531378411206	535	tags=26%, list=17%, signal=24%	FLNA/TPM1/DES/MYL9/CDC42/CNN1/TPM2/LMNA/AZU1/SLMAP/CREB1/MYL6/MYLK/POSTN/SYNM/ACTA1/COL2A1/TWF1/SLC2A4/WFS1/MYH11/CYB5R3/ATP1B1/SORBS2/SOD3/ACTA2/SLC2A3/ITGA5/ABLIM1/SPP1/NDUFB9/PIGR/GIGYF2/COL14A1/CHMP4B/CALD1/ALDOA/SARM1/HERC1/GPI/PPT1/FMR1/SPINK1/GNB1/ERAP1/COL1A1/FABP1/GPX1/FLNA/SNTA1/CC2D1A/GPD1L/ATP2B4/MANF/COL6A1/TMOD3/DMD/PPP1R12B/ATP2A2/CRYAB/SLC45A2/ATP1A2/PRKG1/HSPB7/TGFBI/PICALM/EMD/S…
GO:0000315	CC	GO:0000315	organellar large ribosomal subunit	17	-0.725531500533306	-1.91106735577055	0.00401488093152903	0.173163560177252	0.165418606801328	300	tags=53%, list=10%, signal=48%	MRPL38/MRPL3/MRPL37/MRPL43/MRPL40/MRPL45/MRPL22/MRPL11/MRPL12
GO:0005762	CC	GO:0005762	mitochondrial large ribosomal subunit	17	-0.725531500533306	-1.91106735577055	0.00401488093152903	0.173163560177252	0.165418606801328	300	tags=53%, list=10%, signal=48%	MRPL38/MRPL3/MRPL37/MRPL43/MRPL40/MRPL45/MRPL22/MRPL11/MRPL12
GO:0030336	BP	GO:0030336	negative regulation of cell migration	61	0.413751478488921	1.64745217974145	0.00400412894991324	0.173163560177252	0.165418606801328	154	tags=13%, list=5%, signal=13%	RHOB/TPM1/CLIC4/CNN2/DDT/RRAS/ARHGDIB/VCL
GO:0075509	BP	GO:0075509	endocytosis involved in viral entry into host cell	6	-0.83851906595226	-1.64563744234063	0.00411169544759389	0.175379627897752	0.167535558165271	208	tags=50%, list=7%, signal=47%	CAV1/CAV2/SIGLEC1
GO:0010746	BP	GO:0010746	regulation of long-chain fatty acid import across plasma membrane	3	-0.947296499644828	-1.56153258633331	0.00413255927632051	0.175379627897752	0.167535558165271	26	tags=67%, list=1%, signal=66%	ACSL1/AKT2
GO:0015911	BP	GO:0015911	long-chain fatty acid import across plasma membrane	3	-0.947296499644828	-1.56153258633331	0.00413255927632051	0.175379627897752	0.167535558165271	26	tags=67%, list=1%, signal=66%	ACSL1/AKT2
GO:0036490	BP	GO:0036490	regulation of translation in response to endoplasmic reticulum stress	6	-0.836244592389181	-1.64117366923279	0.0041717191403744	0.176099803712826	0.168223523230551	162	tags=50%, list=5%, signal=47%	NCK1/TMED2/EIF4G1
GO:0043487	BP	GO:0043487	regulation of RNA stability	50	-0.565231809532844	-1.85835048904523	0.0041950012154892	0.176145659503293	0.168267328064346	154	tags=32%, list=5%, signal=31%	DCPS/FXR2/ELAVL1/SYNCRIP/MOV10/FXR1/CNOT2/CSDE1/HNRNPD/TAF15/CNOT1/RBM10/IGF2BP2/CARHSP1/MYD88/ALKBH5
GO:0048738	BP	GO:0048738	cardiac muscle tissue development	35	0.499132788751811	1.77076212348079	0.00428182787334616	0.178845189488816	0.170846118248416	509	tags=37%, list=17%, signal=31%	TPM1/CDC42/LMNA/CREB1/MYH11/SORBS2/COL14A1/FKBP1A/FES/MAPK14/PRKG1/ACTN2/ACADM/TGFB1
GO:0061014	BP	GO:0061014	positive regulation of mRNA catabolic process	30	-0.653147028636274	-1.95135974024699	0.00436839368319709	0.181505613978283	0.173387551977875	2	tags=40%, list=0%, signal=40%	DCPS/FXR2/ELAVL1/SYNCRIP/MOV10/FXR1/CNOT2/GTPBP1/CSDE1/HNRNPD/CNOT1/ALKBH5
GO:0035239	BP	GO:0035239	tube morphogenesis	154	0.315367593612009	1.44433759695048	0.0044634125535759	0.184487718881137	0.176236278568277	390	tags=20%, list=13%, signal=18%	RHOB/FLNA/CDC42/LOXL2/MYLK/ANXA1/CHI3L1/PARVA/CLIC4/HSPB1/TGM2/RRAS/BSG/PDCD6/ITGA5/HDAC7/HSPB6/CALD1/GPLD1/COL3A1/ACTG1/ERAP1/GPX1/CD47/FLNA/FN1/PGK1/GRN/COL15A1/ATP2B4/MAPK14
GO:0036002	MF	GO:0036002	pre-mRNA binding	18	-0.656786823886335	-1.75616041481568	0.00466308641869033	0.191742247765422	0.183166339718613	384	tags=39%, list=12%, signal=34%	HNRNPA2B1/U2AF2/SRSF2/SRSF6/TRA2B/RBM22/CELF2
GO:0034341	BP	GO:0034341	response to type II interferon	37	0.488120391981705	1.74063902233924	0.00474439204948787	0.194079872704824	0.185399411505218	582	tags=41%, list=19%, signal=33%	ARG1/CDC42/ZYX/TRIM21/ACTG1/ACTR2/CD47/VAMP3/LGALS9/STXBP3/SIRPA/GAPDH/HPX/RPL13A/PDE12
GO:0050764	BP	GO:0050764	regulation of phagocytosis	38	0.48968904367158	1.75198591002861	0.00507353863369632	0.20648001331802	0.197244940566159	157	tags=24%, list=5%, signal=23%	FCN2/PRTN3/AZU1/ALOX15/AHSG/TGM2/CNN2/APOA1/CD300LF
GO:0017166	MF	GO:0017166	vinculin binding	9	0.757003557220142	1.77491338958091	0.00526843705276823	0.213317941075351	0.203777033587738	411	tags=67%, list=13%, signal=58%	SYNM/ACTN1/RTCB/TLN1/SORBS3/DMD
GO:0007076	BP	GO:0007076	mitotic chromosome condensation	8	-0.789280724323115	-1.71185039029568	0.00563704723433379	0.227084298739457	0.21692767396031	578	tags=75%, list=19%, signal=61%	CHMP1A/SMC2/NCAPD2/AKAP8/SMC4/NCAPG
GO:0061844	BP	GO:0061844	antimicrobial humoral immune response mediated by antimicrobial peptide	12	0.69131351113602	1.82290478076176	0.00570963087238341	0.228846619208256	0.218611172476902	46	tags=33%, list=1%, signal=33%	S100A12/S100A9/ELANE/LTF
GO:0070252	BP	GO:0070252	actin-mediated cell contraction	23	0.564302435063854	1.79516615665249	0.00579545015865924	0.229290739179662	0.21903542863592	437	tags=40%, list=14%, signal=35%	FLNA/TPM1/MYL6/PARVA/ACTA2/FLNA/SNTA1/GPD1L/ATP2A2/ATP1A2
GO:0033119	BP	GO:0033119	negative regulation of RNA splicing	15	-0.678779921987875	-1.73119022020894	0.00576465613829079	0.229290739179662	0.21903542863592	607	tags=67%, list=20%, signal=54%	SRSF7/SRSF10/HNRNPA2B1/U2AF2/RBM10/SRSF6/RBMX/RPS26/SRSF4/PTBP3
GO:0044270	BP	GO:0044270	cellular nitrogen compound catabolic process	161	-0.40466301519036	-1.54217500676122	0.00580738893335585	0.229290739179662	0.21903542863592	648	tags=24%, list=21%, signal=20%	MOV10/FXR1/FOXK1/FBP1/ADPGK/PPP1R8/HNRNPAB/MTPAP/CNOT2/GTPBP1/CSDE1/HNRNPD/DHX34/TAF15/GIT1/SLC4A1/ENO2/FEN1/CNOT1/RBM10/SUCLG2/EXOG/RBM8A/XRN2/APAF1/MTOR/PDXP/MTREX/ELAC2/IGF2BP2/AMBP/SLIRP/SLC4A4/TRNT1/CARHSP1/CASC3/DUT/MYD88/ALKBH5
GO:0045071	BP	GO:0045071	negative regulation of viral genome replication	12	0.688692995093105	1.81599481712624	0.0059153778672196	0.230119797814974	0.219827406603279	180	tags=46%, list=6%, signal=44%	MX1/LTF/FAM111A/MX1/ISG15/ZC3HAV1
GO:0005684	CC	GO:0005684	U2-type spliceosomal complex	51	-0.520502950734453	-1.71325084452045	0.0058845117507886	0.230119797814974	0.219827406603279	666	tags=38%, list=22%, signal=31%	DDX46/SNRPF/DDX42/CDC40/CRNKL1/SNRNP200/CDC5L/EFTUD2/SMU1/SNRPD3/U2AF2/PRPF4/RBM8A/CCDC12/SNRPG/SNRNP70/RBM22/BCAS2/CASC3/SNRPN
GO:0034655	BP	GO:0034655	nucleobase-containing compound catabolic process	149	-0.411676672771169	-1.56600089817733	0.00589216683912138	0.230119797814974	0.219827406603279	648	tags=29%, list=21%, signal=24%	ACAT1/DCPS/FXR2/OGT/ENTPD1/ELAVL1/SYNCRIP/MOV10/FXR1/FOXK1/FBP1/ADPGK/PPP1R8/HNRNPAB/MTPAP/CNOT2/GTPBP1/CSDE1/HNRNPD/DHX34/TAF15/GIT1/SLC4A1/ENO2/FEN1/CNOT1/RBM10/SUCLG2/EXOG/RBM8A/XRN2/APAF1/MTOR/MTREX/ELAC2/IGF2BP2/SLIRP/SLC4A4/TRNT1/CARHSP1/CASC3/DUT/MYD88/ALKBH5
GO:0045667	BP	GO:0045667	regulation of osteoblast differentiation	15	0.651421817345923	1.83789582066216	0.00609930894379236	0.236117637941152	0.225556985947074	323	tags=40%, list=11%, signal=36%	LTF/LIMD1/CLIC1/HDAC7/TCIRG1/TMEM119
GO:0050684	BP	GO:0050684	regulation of mRNA processing	59	-0.522022450733768	-1.75311856724068	0.00617064332231527	0.236571137226541	0.225990201918711	472	tags=32%, list=15%, signal=28%	SRSF10/DDX17/SMU1/HNRNPA2B1/U2AF2/RBM10/SRSF2/SRSF6/RBM8A/RBMX/RBM39/TRA2B/SNRNP70/SAFB2/RBM3/SRSF4/SUPT6H/CELF2/SLTM
GO:0006909	BP	GO:0006909	phagocytosis	79	0.379984673647092	1.573831776085	0.00615719512173158	0.236571137226541	0.225990201918711	157	tags=16%, list=5%, signal=16%	CDC42/FCN2/PRTN3/AZU1/ELANE/ALOX15/ANXA1/AHSG/TGM2/CNN2/APOA1/ELMO3/CD300LF
GO:0051491	BP	GO:0051491	positive regulation of filopodium assembly	10	0.720967347472958	1.77111232721208	0.0062239986924036	0.237469488571706	0.226848373394184	295	tags=40%, list=10%, signal=36%	CDC42/MIEN1/FMR1/DPYSL3
GO:0010564	BP	GO:0010564	regulation of cell cycle process	139	-0.402716860326935	-1.51548551683176	0.0063595157721877	0.241479029512352	0.230678582680916	743	tags=39%, list=24%, signal=31%	ZW10/SMC5/RBM14/CDC73/TPR/DDRGK1/PTPN11/RRM2B/WNK1/PLCG2/BUB3/CHMP1A/CDK1/SDE2/PDGFRB/BABAM1/CDC27/CTNNB1/RDX/CDC5L/SMC2/RAD21/GIT1/CSNK2A1/XPC/BRCC3/ARID1A/FEN1/WDR76/PIN1/FBXO6/TOM1L2/PLSCR1/RPL23/RAD50/RPL26/MSH2/TRIP13/SMARCD1/MKI67/RRM1/PDXP/NCAPD2/USP47/CRLF3/SMC4/NCAPG/CAV2/PPP1R9B/RRM2/CDK4/RPS27L/EIF4G1/PKP4/PRKDC
GO:0042805	MF	GO:0042805	actinin binding	13	0.673051938621954	1.82768429458268	0.00641598325952391	0.241811441604873	0.230996127233433	358	tags=50%, list=12%, signal=44%	PDLIM7/CSRP1/SYNPO2/PDLIM3/NFKB1/PALLD/PDLIM7
GO:0048762	BP	GO:0048762	mesenchymal cell differentiation	37	0.478354466324731	1.70581369734354	0.00645968064771083	0.241811441604873	0.230996127233433	336	tags=26%, list=11%, signal=23%	FLNA/CDC42/LOXL2/GLIPR2/PDCD6/MCRIP1/S100A4/COL1A1/FLNA/FN1
GO:0019439	BP	GO:0019439	aromatic compound catabolic process	167	-0.401291307573911	-1.54163239833865	0.00643839631693424	0.241811441604873	0.230996127233433	791	tags=29%, list=26%, signal=23%	HAAO/ACAT1/DCPS/FXR2/OGT/ENTPD1/ELAVL1/EPHX1/SYNCRIP/MOV10/FXR1/FOXK1/FBP1/ADPGK/PPP1R8/HNRNPAB/MTPAP/CNOT2/GTPBP1/CSDE1/HNRNPD/DHX34/TAF15/GIT1/SLC4A1/ENO2/FEN1/CNOT1/RBM10/SUCLG2/EXOG/RBM8A/XRN2/APAF1/MTOR/PDXP/MTREX/ELAC2/IGF2BP2/AMBP/SLIRP/SLC4A4/TRNT1/CARHSP1/COMT/CASC3/DUT/MYD88/ALKBH5
GO:0015931	BP	GO:0015931	nucleobase-containing compound transport	79	-0.504783494766485	-1.76062159514185	0.00649099433469081	0.241842868732893	0.231026148744469	82	tags=33%, list=3%, signal=33%	RAE1/NUP37/THOC6/NUP43/NUP107/FXR2/SRSF1/RAN/TPR/SLC35A3/FXR1/SRSF7/WNK1/SRSF3/G3BP2/SEC13/HNRNPA2B1/RSC1A1/MCM3AP/RBM8A/IGF2BP2/DDX39B/ALYREF/CASC3/SUPT6H/ALKBH5
GO:0042730	BP	GO:0042730	fibrinolysis	12	-0.707035442473104	-1.70536189247639	0.00655088670823342	0.242933817367011	0.232068303358077	651	tags=50%, list=21%, signal=40%	SERPINF2/PLG/SERPING1/FGG/FGB/FGA
GO:0002040	BP	GO:0002040	sprouting angiogenesis	19	0.610042793386319	1.85491170576161	0.00668694603722184	0.246826063959965	0.235786464431196	221	tags=37%, list=7%, signal=34%	CDC42/LOXL2/ANXA1/PARVA/ITGA5/HDAC7/GPLD1
GO:0000313	CC	GO:0000313	organellar ribosome	22	-0.703840074460247	-1.95886385380427	0.0074654282335087	0.249487797326353	0.238329148496445	300	tags=50%, list=10%, signal=45%	MRPL38/MRPS34/MRPL3/MRPS18B/MRPL37/MRPL43/MRPL40/MRPL45/MRPL22/MRPL11/MRPL12
GO:0005761	CC	GO:0005761	mitochondrial ribosome	22	-0.703840074460247	-1.95886385380427	0.0074654282335087	0.249487797326353	0.238329148496445	300	tags=50%, list=10%, signal=45%	MRPL38/MRPS34/MRPL3/MRPS18B/MRPL37/MRPL43/MRPL40/MRPL45/MRPL22/MRPL11/MRPL12
GO:0032233	BP	GO:0032233	positive regulation of actin filament bundle assembly	20	0.606558208153333	1.88738021380153	0.00684349383644945	0.249487797326353	0.238329148496445	403	tags=36%, list=13%, signal=32%	FLNA/TPM1/CDC42/APOA1/SYNPO2/CD47/FLNA/SORBS3
GO:0005882	CC	GO:0005882	intermediate filament	20	0.60419055783073	1.880012979607	0.00730355016161611	0.249487797326353	0.238329148496445	153	tags=30%, list=5%, signal=29%	DES/LMNA/CLIP1/SYNM/GFAP/NME2
GO:0003300	BP	GO:0003300	cardiac muscle hypertrophy	21	0.572711769426238	1.78912008491546	0.00751355639629516	0.249487797326353	0.238329148496445	445	tags=33%, list=14%, signal=29%	LMNA/TWF1/SORBS2/COL14A1/ATP2B4/ATP2A2/PRKG1
GO:0014897	BP	GO:0014897	striated muscle hypertrophy	21	0.572711769426238	1.78912008491546	0.00751355639629516	0.249487797326353	0.238329148496445	445	tags=33%, list=14%, signal=29%	LMNA/TWF1/SORBS2/COL14A1/ATP2B4/ATP2A2/PRKG1
GO:0071479	BP	GO:0071479	cellular response to ionizing radiation	12	0.677231738128355	1.78577295717698	0.00745848505163185	0.249487797326353	0.238329148496445	439	tags=46%, list=14%, signal=40%	RHOB/TMEM109/MAPK14/H2AX/CRYAB/BRCC3
GO:0003159	BP	GO:0003159	morphogenesis of an endothelium	6	0.827563425276643	1.76245563115472	0.0073589435739265	0.249487797326353	0.238329148496445	1	tags=17%, list=0%, signal=17%	RHOB
GO:0061154	BP	GO:0061154	endothelial tube morphogenesis	6	0.827563425276643	1.76245563115472	0.0073589435739265	0.249487797326353	0.238329148496445	1	tags=17%, list=0%, signal=17%	RHOB
GO:0071346	BP	GO:0071346	cellular response to type II interferon	34	0.49817147470067	1.75691095017881	0.00732502720969916	0.249487797326353	0.238329148496445	582	tags=41%, list=19%, signal=34%	ARG1/CDC42/ZYX/ACTG1/ACTR2/CD47/VAMP3/LGALS9/STXBP3/SIRPA/GAPDH/HPX/RPL13A/PDE12
GO:0048029	MF	GO:0048029	monosaccharide binding	28	0.521749411063948	1.75008600271885	0.00728285889594345	0.249487797326353	0.238329148496445	335	tags=31%, list=11%, signal=28%	PLOD1/BSG/SLC2A3/ALDOA/ALDOB/GPI/HK3/TALDO1/LGALS9
GO:0045727	BP	GO:0045727	positive regulation of translation	49	-0.527907434294169	-1.73396948193187	0.00698154181477541	0.249487797326353	0.238329148496445	758	tags=39%, list=25%, signal=30%	FXR2/OGT/ELAVL1/SYNCRIP/RPS4X/FXR1/CSDE1/HNRNPD/MRPS27/NIBAN1/RPL26/MTOR/ERBB2/NCK1/PLXNB2/RBM3/RPS27L/EIF4G1/PRKDC
GO:0060485	BP	GO:0060485	mesenchyme development	44	0.465621890934972	1.71966736682213	0.00731143272399077	0.249487797326353	0.238329148496445	336	tags=26%, list=11%, signal=24%	FLNA/CDC42/LOXL2/ACTA1/GLIPR2/PDCD6/MCRIP1/ACTA2/S100A4/COL1A1/FLNA/FN1
GO:0031526	CC	GO:0031526	brush border membrane	14	-0.682367708280546	-1.71796042736895	0.00745484569236399	0.249487797326353	0.238329148496445	587	tags=43%, list=19%, signal=35%	PDZK1/CDHR5/MFSD10/PRKCB/MTTP/CUBN
GO:0035821	BP	GO:0035821	modulation of process of another organism	4	0.910537526815475	1.70731894064586	0.0074728358946062	0.249487797326353	0.238329148496445	10	tags=50%, list=0%, signal=50%	ARG1/S100A9
GO:0007517	BP	GO:0007517	muscle organ development	54	0.427413933096458	1.64907782746699	0.00707849741061728	0.249487797326353	0.238329148496445	519	tags=39%, list=17%, signal=33%	TPM1/DES/COL6A3/CREB1/TAGLN/MYL6/MYLK/ACTA1/CFL2/FKBP1A/COL6A3/COL3A1/ITGA7/GPX1/MAPK14/COL6A1/DMD/CRYAB/SVIL/EMD/TGFB1/NIBAN2
GO:0005681	CC	GO:0005681	spliceosomal complex	97	-0.45140549478653	-1.6186232153389	0.00699248860602798	0.249487797326353	0.238329148496445	818	tags=40%, list=27%, signal=31%	LSM3/LGALS3/SART1/RALY/SRSF1/SYNCRIP/DDX46/SNRPF/DDX42/CDC40/CRNKL1/PPP1R8/SNRNP200/HNRNPM/CDC5L/EFTUD2/SMU1/SNRPD3/PPIL2/HNRNPA2B1/U2AF2/DDX23/SRSF2/PRPF4/RBM8A/RBMX/CCDC12/MTREX/PNN/SNRPG/TRA2B/SNRNP70/HNRNPA3/DDX39B/RBM22/RBM3/BCAS2/ALYREF/CASC3/SNRPN
GO:0045668	BP	GO:0045668	negative regulation of osteoblast differentiation	3	0.9258088900412	1.60713311154922	0.00691621194759649	0.249487797326353	0.238329148496445	190	tags=67%, list=6%, signal=63%	LIMD1/HDAC7
GO:0004332	MF	GO:0004332	fructose-bisphosphate aldolase activity	3	0.924153645833333	1.60425973476187	0.00736241316708227	0.249487797326353	0.238329148496445	236	tags=75%, list=8%, signal=69%	ALDOC/ALDOA/ALDOB
GO:0060623	BP	GO:0060623	regulation of chromosome condensation	6	-0.814991585798627	-1.5994635342724	0.00681631971910188	0.249487797326353	0.238329148496445	468	tags=67%, list=15%, signal=57%	SMC2/NCAPD2/SMC4/NCAPG
GO:0005044	MF	GO:0005044	scavenger receptor activity	6	-0.813383954059699	-1.59630847305734	0.00729887884688361	0.249487797326353	0.238329148496445	242	tags=33%, list=8%, signal=31%	CD163/LGALS3BP
GO:0000375	BP	GO:0000375	RNA splicing, via transesterification reactions	133	-0.422497317366441	-1.58226555704969	0.00733212508882729	0.249487797326353	0.238329148496445	869	tags=39%, list=28%, signal=29%	SON/HTATSF1/THRAP3/LSM3/SART1/HNRNPL/DCPS/RALY/RBM14/SRSF1/SYNCRIP/DDX46/GEMIN5/SNRPF/DDX42/CDC40/SRSF7/CRNKL1/SRSF3/SNRNP200/HNRNPM/SDE2/SRSF10/CDC5L/EFTUD2/DDX17/SMU1/SNRPD3/HNRNPA2B1/SRSF5/U2AF2/RBM10/DDX23/SRSF2/SRSF6/PRPF4/RBM8A/RBMX/RBM39/MTREX/PNN/SNRPG/TRA2B/SNRNP70/HNRNPA3/DDX39B/RBM22/RBM3/BCAS2/SRSF4/CASC3/SNRPN/CELF2
GO:0046700	BP	GO:0046700	heterocycle catabolic process	162	-0.406268082906604	-1.54950178582799	0.0069942812506704	0.249487797326353	0.238329148496445	648	tags=24%, list=21%, signal=20%	MOV10/FXR1/FOXK1/FBP1/ADPGK/PPP1R8/HNRNPAB/MTPAP/CNOT2/GTPBP1/CSDE1/HNRNPD/DHX34/TAF15/GIT1/SLC4A1/ENO2/FEN1/CNOT1/RBM10/SUCLG2/EXOG/RBM8A/XRN2/APAF1/MTOR/PDXP/MTREX/ELAC2/IGF2BP2/AMBP/SLIRP/SLC4A4/TRNT1/CARHSP1/CASC3/DUT/MYD88/ALKBH5
GO:0014889	BP	GO:0014889	muscle atrophy	3	-0.932021526488127	-1.53635317487291	0.00729148886681452	0.249487797326353	0.238329148496445	102	tags=67%, list=3%, signal=65%	RPS6KB1/TBCE
GO:1902903	BP	GO:1902903	regulation of supramolecular fiber organization	135	0.312406904461337	1.40434550412442	0.00759934040591847	0.251284856089037	0.240045831593969	472	tags=24%, list=15%, signal=21%	FLNA/TPM1/CDC42/DSTN/CLIP1/ALOX15/TWF1/COTL1/CFL2/CAPG/CLU/APOA1/DRG1/SYNPO2/PFDN2/MAP1B/WASHC5/TWF2/ACTG1/GPX1/CD47/FLNA/FES/COL6A1/TMOD3/ARPC5/SORBS3/CRYAB/SVIL/NCKAP1/SH3BP1/ACTN2/KANK2
GO:0038024	MF	GO:0038024	cargo receptor activity	18	-0.634276300793157	-1.69597027680543	0.00763865721177379	0.251536861546211	0.240286565796876	555	tags=39%, list=18%, signal=32%	SORL1/MIA3/TMED5/CD163/LGALS3BP/CUBN/TMED2
GO:0060717	BP	GO:0060717	chorion development	3	-0.930433312106861	-1.53373514713675	0.00779871050721461	0.254693689651256	0.243302200879184	210	tags=67%, list=7%, signal=62%	HTRA1/TMED2
GO:1903867	BP	GO:1903867	extraembryonic membrane development	3	-0.930433312106861	-1.53373514713675	0.00779871050721461	0.254693689651256	0.243302200879184	210	tags=67%, list=7%, signal=62%	HTRA1/TMED2
GO:0031640	BP	GO:0031640	killing of cells of another organism	21	0.571114851000896	1.78413139953954	0.00798684179655572	0.258708475499862	0.247137420488912	46	tags=24%, list=1%, signal=24%	ARG1/S100A12/AZU1/ELANE/LTF
GO:0141061	BP	GO:0141061	disruption of cell in another organism	21	0.571114851000896	1.78413139953954	0.00798684179655572	0.258708475499862	0.247137420488912	46	tags=24%, list=1%, signal=24%	ARG1/S100A12/AZU1/ELANE/LTF
GO:0010976	BP	GO:0010976	positive regulation of neuron projection development	29	0.506849630383079	1.70895402114186	0.00809792040885957	0.260182576375342	0.248545590388266	385	tags=33%, list=13%, signal=29%	FLNA/S100A9/TWF1/NME2/WASHC5/TWF2/DPYSL3/FLNA/GRN/FES
GO:0016772	MF	GO:0016772	transferase activity, transferring phosphorus-containing groups	168	-0.399951192050956	-1.53751322761557	0.00808185739955483	0.260182576375342	0.248545590388266	602	tags=26%, list=20%, signal=22%	LTBP4/WNK1/ADPGK/PIP4K2A/GNPTAB/MTPAP/CDK1/SEPHS2/CDS2/CDK5/PDGFRB/UCKL1/UAP1L1/CSNK2A1/ALDH18A1/CCNK/KHK/EFEMP1/UAP1/BRD2/GRK2/MTOR/STK38L/PRPSAP2/POLD1/ERBB2/POLR2E/RPAP1/PRKCB/TRNT1/POLR2K/ARAF/PDXK/PPP1R9B/PRPS1/MAP4K1/PRPS2/SELENOO/PARP2/CDK4/AKT2/TP53RK/PRKDC/RPS6KA5
GO:0062197	BP	GO:0062197	cellular response to chemical stress	79	0.375211329823833	1.55406139925607	0.00813465759622957	0.260309043079346	0.248666400713266	324	tags=15%, list=11%, signal=14%	RHOB/TPM1/MYLK/MMP9/MPO/SLC2A4/NME2/SOD3/TRIM21/STAT6/FABP1/GPX1
GO:0031102	BP	GO:0031102	neuron projection regeneration	16	0.622029447843184	1.78661643552831	0.00818614212983983	0.260904513824935	0.249235238296793	361	tags=41%, list=12%, signal=37%	FLNA/GFAP/SPP1/MAP1B/MAP2K2/FLNA/GRN
GO:0016705	MF	GO:0016705	oxidoreductase activity, acting on paired donors, with incorporation or reduction of molecular oxygen	23	-0.679262212070716	-1.91496852869001	0.00822885544854025	0.261216787358462	0.249533545012155	2	tags=9%, list=0%, signal=9%	PLOD2/ALKBH5
GO:0042581	CC	GO:0042581	specific granule	58	0.400174608097562	1.56369077121194	0.00839575537373517	0.264399661293501	0.252574060992651	342	tags=24%, list=11%, signal=22%	ARG1/OLFM4/ELANE/LTF/CD177/CHI3L1/LCN2/CNN2/VCL/SLC2A3/STOM/NFKB1/CD47/STXBP3
GO:0071702	BP	GO:0071702	organic substance transport	548	-0.31060299231131	-1.2832312312344	0.00836273441583097	0.264399661293501	0.252574060992651	761	tags=27%, list=25%, signal=24%	SEC24A/FXR2/VPS36/RAB2A/PITPNB/ZW10/TOMM7/SFXN5/SCRIB/GGA3/SRSF1/ELAVL1/RAN/TOM1/TPR/NDUFA13/SLC35A3/TIMM9/PDCD5/ARHGEF2/UBAC2/MYO5B/FXR1/SFXN1/PTPN11/KIF5B/NPC1L1/SNX2/FABP6/EHD3/APOE/SRSF7/WNK1/PIP4K2A/PDZK1/PGRMC1/LTBP2/TNPO3/CHMP1A/ARFIP1/SRSF3/GNPTAB/CDK1/SORL1/SRPRA/VPS37C/CDK5/VTI1A/SNX12/VTA1/RABEP1/CELA2A/STX7/G3BP2/MFSD10/CTSA/MIA2/CHP1/EXOC2/SEC61B/GNA11/SEC13/PITPNA/SLC4A1/VPS51/HNF4A…
GO:0007205	BP	GO:0007205	protein kinase C-activating G protein-coupled receptor signaling pathway	3	0.918743278484939	1.59486775267488	0.00843329734912167	0.264532204595374	0.2527006761322	196	tags=67%, list=6%, signal=62%	AZU1/DGKA
GO:0002189	CC	GO:0002189	ribose phosphate diphosphokinase complex	3	-0.926106770833333	-1.52660323523033	0.00855954429561039	0.266386445215545	0.25447198355825	231	tags=100%, list=8%, signal=93%	PRPS1/PRPS2
GO:0004749	MF	GO:0004749	ribose phosphate diphosphokinase activity	3	-0.926106770833333	-1.52660323523033	0.00855954429561039	0.266386445215545	0.25447198355825	231	tags=100%, list=8%, signal=93%	PRPS1/PRPS2
GO:0015934	CC	GO:0015934	large ribosomal subunit	60	-0.532216437210879	-1.78805512799941	0.0087313572302233	0.269618875404872	0.257559839328561	513	tags=35%, list=17%, signal=30%	RPL31/RPL13/RPL35/RPL3/RPL4/RPL23/RPL26/MRPL38/RPL19/MRPL3/RPL15/MRPL37/MRPL43/MRPL40/RPL32/RBM3/MRPL45/MRPL22/MRPL11/RPL26L1/MRPL12
GO:0071482	BP	GO:0071482	cellular response to light stimulus	25	-0.617193693216598	-1.76964151007879	0.0087024608803158	0.269618875404872	0.257559839328561	502	tags=44%, list=16%, signal=37%	SDE2/MME/XPC/RDH11/RPL26/BAK1/POLD1/USP47/MFAP4/ERCC4/AKT2
GO:0071692	BP	GO:0071692	protein localization to extracellular region	83	-0.448359105605953	-1.57743400256652	0.0087978184475369	0.270618167440515	0.258514436797882	637	tags=34%, list=21%, signal=27%	PTPN11/APOE/LTBP2/ARFIP1/GNPTAB/CELA2A/MIA2/GNA11/HNF4A/CHGA/FBN1/EIPR1/MIA3/SLC25A22/CD2AP/CD200/PRKCB/RAB3D/MTTP/MYO18A/COMT/FGG/ERP29/LLGL2/FGB/TMED2/AP1G1/FGA
GO:0032543	BP	GO:0032543	mitochondrial translation	33	-0.644854427070915	-1.9727090758737	0.00923698777518445	0.276135258024529	0.26378476871454	300	tags=36%, list=10%, signal=33%	MRPL38/MRPS34/MRPL3/MRPS18B/MRPL37/MRPL43/MRPL40/MRPL45/MRPL22/DARS2/MRPL11/MRPL12
GO:0043488	BP	GO:0043488	regulation of mRNA stability	48	-0.569574747005828	-1.86451432429892	0.0100221632080774	0.276135258024529	0.26378476871454	154	tags=33%, list=5%, signal=32%	DCPS/FXR2/ELAVL1/SYNCRIP/MOV10/FXR1/CNOT2/CSDE1/HNRNPD/TAF15/CNOT1/RBM10/IGF2BP2/CARHSP1/MYD88/ALKBH5
GO:0033135	BP	GO:0033135	regulation of peptidyl-serine phosphorylation	23	-0.659157112160502	-1.85828845299897	0.00994990086825618	0.276135258024529	0.26378476871454	304	tags=35%, list=10%, signal=32%	AKAP9/BAK1/CAV1/DOCK7/NCK1/ARAF/MIF/EIF4G1
GO:0032943	BP	GO:0032943	mononuclear cell proliferation	54	-0.53194373743125	-1.77177319744225	0.00999371600784886	0.276135258024529	0.26378476871454	480	tags=22%, list=16%, signal=19%	CTNNB1/CTPS1/CD22/FADD/SLC4A2/SPTA1/CASP3/ERBB2/NCK1/MIF/MYD88/ALKBH5
GO:0046651	BP	GO:0046651	lymphocyte proliferation	54	-0.53194373743125	-1.77177319744225	0.00999371600784886	0.276135258024529	0.26378476871454	480	tags=22%, list=16%, signal=19%	CTNNB1/CTPS1/CD22/FADD/SLC4A2/SPTA1/CASP3/ERBB2/NCK1/MIF/MYD88/ALKBH5
GO:0030500	BP	GO:0030500	regulation of bone mineralization	8	0.766119068958	1.75756799460862	0.00951037608664536	0.276135258024529	0.26378476871454	323	tags=50%, list=11%, signal=45%	LTF/AHSG/ISG15/TMEM119
GO:2001044	BP	GO:2001044	regulation of integrin-mediated signaling pathway	8	0.765261652402065	1.75560097935235	0.00961101405286642	0.276135258024529	0.26378476871454	701	tags=78%, list=23%, signal=60%	FLNA/CD177/LAMC1/FLNA/LAMB1/NID1/LAMB2
GO:0017014	BP	GO:0017014	protein nitrosylation	8	0.764664966078625	1.75423211016818	0.00981229001389896	0.276135258024529	0.26378476871454	499	tags=62%, list=16%, signal=52%	S100A9/SNTA1/ATP2B4/DMD/GAPDH
GO:0018119	BP	GO:0018119	peptidyl-cysteine S-nitrosylation	8	0.764664966078625	1.75423211016818	0.00981229001389896	0.276135258024529	0.26378476871454	499	tags=62%, list=16%, signal=52%	S100A9/SNTA1/ATP2B4/DMD/GAPDH
GO:0097530	BP	GO:0097530	granulocyte migration	34	0.486112592364024	1.71438265721121	0.00931739665340139	0.276135258024529	0.26378476871454	139	tags=18%, list=5%, signal=17%	S100A12/S100A9/PRTN3/CD177/ANXA1/BSG
GO:0035173	MF	GO:0035173	histone kinase activity	7	-0.819118606109453	-1.70623940731876	0.00970138852778611	0.276135258024529	0.26378476871454	189	tags=43%, list=6%, signal=40%	PRKCB/PRKDC/RPS6KA5
GO:0030043	BP	GO:0030043	actin filament fragmentation	4	0.903584830883026	1.69428216939324	0.00972968612173446	0.276135258024529	0.26378476871454	106	tags=75%, list=3%, signal=73%	DSTN/CFL2/CFL1
GO:0042098	BP	GO:0042098	T cell proliferation	42	-0.532536374749172	-1.68860720092231	0.0092522335751873	0.276135258024529	0.26378476871454	480	tags=21%, list=16%, signal=18%	CTNNB1/CTPS1/FADD/SLC4A2/SPTA1/CASP3/ERBB2/NCK1/ALKBH5
GO:1905818	BP	GO:1905818	regulation of chromosome separation	18	-0.628890726226424	-1.68156996833217	0.00915553035471909	0.276135258024529	0.26378476871454	743	tags=61%, list=24%, signal=47%	ZW10/TPR/BUB3/SMC2/RAD21/CSNK2A1/PLSCR1/TRIP13/NCAPD2/SMC4/NCAPG
GO:0031639	BP	GO:0031639	plasminogen activation	11	-0.71225942941541	-1.67301836660184	0.0095385907966372	0.276135258024529	0.26378476871454	124	tags=55%, list=4%, signal=53%	SERPINF2/CTSZ/FGG/CLEC3B/FGB/FGA
GO:0043555	BP	GO:0043555	regulation of translation in response to stress	10	-0.723729234502717	-1.67065242132461	0.00910161720075127	0.276135258024529	0.26378476871454	162	tags=30%, list=5%, signal=29%	NCK1/TMED2/EIF4G1
GO:0008200	MF	GO:0008200	ion channel inhibitor activity	10	-0.721138696371703	-1.66467243793471	0.00968133043701389	0.276135258024529	0.26378476871454	503	tags=60%, list=16%, signal=50%	LAMP1/STX7/RSC1A1/CAV1/AMBP/VAMP8
GO:0016248	MF	GO:0016248	channel inhibitor activity	10	-0.721138696371703	-1.66467243793471	0.00968133043701389	0.276135258024529	0.26378476871454	503	tags=60%, list=16%, signal=50%	LAMP1/STX7/RSC1A1/CAV1/AMBP/VAMP8
GO:0141110	MF	GO:0141110	transporter inhibitor activity	10	-0.721138696371703	-1.66467243793471	0.00968133043701389	0.276135258024529	0.26378476871454	503	tags=60%, list=16%, signal=50%	LAMP1/STX7/RSC1A1/CAV1/AMBP/VAMP8
GO:0072577	BP	GO:0072577	endothelial cell apoptotic process	11	-0.708371085467772	-1.66388507812379	0.0100067367564498	0.276135258024529	0.26378476871454	124	tags=36%, list=4%, signal=35%	ITGA4/FGG/FGB/FGA
GO:2000351	BP	GO:2000351	regulation of endothelial cell apoptotic process	11	-0.708371085467772	-1.66388507812379	0.0100067367564498	0.276135258024529	0.26378476871454	124	tags=36%, list=4%, signal=35%	ITGA4/FGG/FGB/FGA
GO:0048024	BP	GO:0048024	regulation of mRNA splicing, via spliceosome	51	-0.501017869619625	-1.64911512419759	0.009203913668362	0.276135258024529	0.26378476871454	607	tags=35%, list=20%, signal=29%	SRSF7/SRSF3/SRSF10/DDX17/SMU1/HNRNPA2B1/U2AF2/RBM10/SRSF2/SRSF6/RBM8A/RBMX/RBM39/TRA2B/SNRNP70/RBM3/SRSF4/CELF2
GO:0090050	BP	GO:0090050	positive regulation of cell migration involved in sprouting angiogenesis	3	0.916682836968246	1.59129098448707	0.00905798041353638	0.276135258024529	0.26378476871454	190	tags=67%, list=6%, signal=63%	ANXA1/HDAC7
GO:0043249	BP	GO:0043249	erythrocyte maturation	5	-0.847085335746735	-1.58604786639171	0.00939427370238314	0.276135258024529	0.26378476871454	100	tags=60%, list=3%, signal=58%	RAC2/EPB42/PTBP3
GO:2000146	BP	GO:2000146	negative regulation of cell motility	67	0.392051674142326	1.57862260502655	0.00993839686265999	0.276135258024529	0.26378476871454	154	tags=12%, list=5%, signal=11%	RHOB/TPM1/CLIC4/CNN2/DDT/RRAS/ARHGDIB/VCL
GO:1901342	BP	GO:1901342	regulation of vasculature development	61	0.386334953875718	1.53828661639431	0.00961043905962443	0.276135258024529	0.26378476871454	519	tags=26%, list=17%, signal=22%	RHOB/CHI3L1/HSPB1/RRAS/PDCD6/ITGA5/HSPB6/ERAP1/PGK1/GRN/ATP2B4/PDCL3/PKM/PTGIS/TGFB1/NIBAN2
GO:0070820	CC	GO:0070820	tertiary granule	61	0.385099104558773	1.53336578164958	0.0100792308770863	0.276135258024529	0.26378476871454	342	tags=27%, list=11%, signal=24%	OLFM4/LTF/CD177/MMP9/ALDOC/CNN2/AP2A2/LTA4H/SERPINB10/SLC2A3/STOM/ALDOA/TCIRG1/IDH1/CSTB/CD47/STXBP3
GO:0031329	BP	GO:0031329	regulation of cellular catabolic process	182	-0.394798474151543	-1.52564274701427	0.0100906281284165	0.276135258024529	0.26378476871454	648	tags=26%, list=21%, signal=22%	MOV10/FXR1/FOXK1/APOE/WNK1/FBP1/PIP4K2A/UBQLN1/HNRNPAB/SORL1/CNOT2/GTPBP1/CSDE1/HNRNPD/SPTLC1/CDK5/DHX34/CTSA/TAF15/GIT1/SLC4A1/CISD2/CSNK2A1/RASIP1/PLIN5/CNOT1/RBM10/CTTN/CASP3/RBM8A/KEAP1/APAF1/MTOR/STK38L/RRAGB/IGF2BP2/SLIRP/SLC4A4/HP/CARHSP1/SNRNP70/ERCC4/CASC3/AKT2/EIF4G1/MYD88/ALKBH5
GO:1901030	BP	GO:1901030	positive regulation of mitochondrial outer membrane permeabilization involved in apoptotic signaling pathway	3	-0.924479166666667	-1.52392027699618	0.0091935734179629	0.276135258024529	0.26378476871454	236	tags=100%, list=8%, signal=92%	ATP5IF1/HIP1R
GO:0140513	CC	GO:0140513	nuclear protein-containing complex	319	-0.340950732299118	-1.37349169170396	0.00951035118561763	0.276135258024529	0.26378476871454	1147	tags=44%, list=37%, signal=31%	MFAP1/SART3/DIS3/S100A10/EXOSC6/STAT3/COPS7A/SF3B3/COPS6/SIN3A/SMARCC2/MMS19/SNRPA/TEP1/CSTF3/NUP93/CSNK2B/SFPQ/EXOSC4/MTA2/NUP153/RELA/STAT2/CPSF3/NUP133/HNRNPC/MAD1L1/XRCC5/GEMIN2/PRMT5/VPS4B/SHMT2/LSM8/MCM6/INTS11/DEK/ADAR/RAE1/HTATSF1/THRAP3/NUP37/WDR3/XRCC1/TAF7/THOC6/NUP43/BCLAF1/LSM3/BOP1/MCM7/LGALS3/NUP107/POLR2A/SART1/CCDC9/EPB41L2/MEPCE/RALY/CHD4/SRSF1/CDC73/RAN/TPR/SYNCRIP/DDX21/DDX46/…
GO:0010558	BP	GO:0010558	negative regulation of macromolecule biosynthetic process	393	-0.327079237675733	-1.33387241813056	0.010051784222727	0.276135258024529	0.26378476871454	771	tags=27%, list=25%, signal=23%	RPS14/MEPCE/DCPS/FXR2/KDM1A/OGT/RALY/CHD4/ELAVL1/CDC73/RAN/TPR/SYNCRIP/INPP5D/DDRGK1/DDX21/NDUFA13/MRPL13/ANXA4/SERPINF2/MOV10/FXR1/FOXK1/PTPN11/CTSZ/MAFG/CHD3/DHRS7B/APOE/SRSF7/FBP1/CHMP1A/ADNP/SRSF3/HNRNPAB/GATAD2B/MTPAP/CDK1/SMCHD1/CNOT2/CTBP1/GTPBP1/CSDE1/HNRNPD/CDK5/SNX12/CTNNB1/DHX34/SRSF10/RAD21/TAF15/DDX17/SHMT1/GIT1/PPM1B/NCOA5/PSMC5/STRN3/HNF4A/CD22/EPRS1/SCAF8/CSNK2A1/HNRNPA2B1/CNOT1/U…
GO:0010468	BP	GO:0010468	regulation of gene expression	766	-0.300384106922673	-1.2499501288826	0.00959606860879702	0.276135258024529	0.26378476871454	738	tags=25%, list=24%, signal=25%	OGT/RALY/SCRIB/RBM14/PCBP1/CHD4/SRSF1/TRMT112/RNF40/ELAVL1/CDC73/RAN/TPR/SYNCRIP/INPP5D/TRIM25/DDRGK1/DDX21/GCN1/NDUFA13/MRPL13/RPS4X/PDCD5/ARHGEF2/LRRFIP2/ANXA4/GEMIN5/SERPINF2/MOV10/FXR1/FOXK1/ITGA6/PTPN11/CTSZ/MAFG/CHD3/DHRS7B/APOE/SRSF7/PELP1/WNK1/FBP1/FCN1/PLCG2/CHMP1A/NFYC/ADNP/SRSF3/HNRNPAB/GATAD2B/MTPAP/CDK1/SORL1/SMCHD1/CNOT2/CTBP1/GTPBP1/CSDE1/H3C1/HNRNPD/MRPS27/LMO7/CDK5/SNX12/CTNNB1/G…
GO:0099563	BP	GO:0099563	modification of synaptic structure	11	0.69214026913382	1.796553604566	0.0102706608514142	0.280096097995956	0.267568455242847	24	tags=18%, list=1%, signal=18%	RHOB/CDC42
GO:0034366	CC	GO:0034366	spherical high-density lipoprotein particle	3	0.9150390625	1.58843751828659	0.010313503529687	0.280301246615056	0.267764428337441	264	tags=100%, list=9%, signal=92%	CLU/APOA1/APOC3
GO:0010882	BP	GO:0010882	regulation of cardiac muscle contraction by calcium ion signaling	8	0.760338038819539	1.7443056259261	0.0104171095977266	0.282150791015556	0.269531249588025	503	tags=75%, list=16%, signal=63%	ATP1B1/DMD/ATP2A2/ATP1A2/CLIC2/CALM3
GO:0014909	BP	GO:0014909	smooth muscle cell migration	17	0.599687055489824	1.75828683075861	0.0105732989748047	0.282524244660102	0.269888000058634	98	tags=22%, list=3%, signal=22%	TPM1/S100A11/POSTN/PARVA
GO:0014704	CC	GO:0014704	intercalated disc	17	0.598230829321796	1.75401716498809	0.0105732989748047	0.282524244660102	0.269888000058634	224	tags=35%, list=7%, signal=33%	DES/PGM5/ATP1B1/VCL/ACTN1/YWHAH
GO:0072175	BP	GO:0072175	epithelial tube formation	21	-0.615011602315757	-1.69983403622998	0.0105333932435417	0.282524244660102	0.269888000058634	480	tags=38%, list=16%, signal=32%	CTNNB1/HS2ST1/MMRN2/CASP3/BRD2/APAF1/PLXNB2/TMED2
GO:0031324	BP	GO:0031324	negative regulation of cellular metabolic process	505	-0.317412132058925	-1.30693918982419	0.010554204966558	0.282524244660102	0.269888000058634	711	tags=25%, list=23%, signal=23%	ELAVL1/CDC73/RAN/TPR/SYNCRIP/INPP5D/DDRGK1/DDX21/NDUFA13/MRPL13/MICAL1/ANXA4/SERPINF2/CORO1C/MOV10/FXR1/FOXK1/PTPN11/CTSZ/MAFG/CHD3/ERLIN2/DHRS7B/APOE/SRSF7/WNK1/FBP1/PRMT3/PPP1R8/CHMP1A/ADNP/SRSF3/HNRNPAB/GATAD2B/MTPAP/CDK1/SORL1/SMCHD1/CNOT2/CTBP1/SWAP70/GTPBP1/CSDE1/HNRNPD/CDK5/SNX12/CTNNB1/DHX34/SRSF10/RAD21/CTSA/TAF15/DDX17/FKBP1A/SHMT1/GIT1/CHP1/PPM1B/NCOA5/PSMC5/STRN3/SLC4A1/HNF4A/CD22/NIB…
GO:0060326	BP	GO:0060326	cell chemotaxis	61	0.382643264744776	1.52358725791006	0.0107042873044955	0.284111117218984	0.271403897789039	139	tags=13%, list=5%, signal=13%	S100A12/S100A9/AZU1/ANXA1/PARVA/HSPB1/DDT/BSG
GO:0045321	BP	GO:0045321	leukocyte activation	175	-0.382077034521422	-1.47134658963021	0.0106742785648416	0.284111117218984	0.271403897789039	480	tags=20%, list=16%, signal=18%	CTNNB1/C1QA/CTPS1/FKBP1A/CD22/CHGA/FADD/SLC4A2/ARID1A/TOP2B/SPTA1/PLSCR1/MSH2/CASP3/IGBP1/BRD2/SMARCD1/MTOR/BPI/BAK1/CD2AP/ERBB2/CD200/CAV1/IKZF1/PRKCB/NCK1/MYO18A/MIF/AP1G1/VAMP8/SUPT6H/MYD88/PRKDC/ALKBH5
GO:0001841	BP	GO:0001841	neural tube formation	17	-0.635255962051366	-1.67327942445312	0.0109238622577716	0.286111455041834	0.273314768040547	288	tags=29%, list=9%, signal=27%	CASP3/BRD2/APAF1/PLXNB2/TMED2
GO:0001843	BP	GO:0001843	neural tube closure	17	-0.635255962051366	-1.67327942445312	0.0109238622577716	0.286111455041834	0.273314768040547	288	tags=29%, list=9%, signal=27%	CASP3/BRD2/APAF1/PLXNB2/TMED2
GO:0014020	BP	GO:0014020	primary neural tube formation	17	-0.635255962051366	-1.67327942445312	0.0109238622577716	0.286111455041834	0.273314768040547	288	tags=29%, list=9%, signal=27%	CASP3/BRD2/APAF1/PLXNB2/TMED2
GO:0060606	BP	GO:0060606	tube closure	17	-0.635255962051366	-1.67327942445312	0.0109238622577716	0.286111455041834	0.273314768040547	288	tags=29%, list=9%, signal=27%	CASP3/BRD2/APAF1/PLXNB2/TMED2
GO:0120035	BP	GO:0120035	regulation of plasma membrane bounded cell projection organization	122	0.326083848630273	1.44028102428468	0.0110428832431731	0.288277373084941	0.275383812733147	385	tags=20%, list=13%, signal=18%	FLNA/S100A9/CDC42/TWF1/CFL1/GFAP/NME2/MIEN1/SPP1/MAP1B/WASHC5/TWF2/YWHAH/SARM1/MAP2K2/FMR1/DPYSL3/ACTR2/FLNA/FN1/MAP4/GRN/IST1/FES
GO:0000028	BP	GO:0000028	ribosomal small subunit assembly	8	-0.760116648570978	-1.64859718656171	0.0112123616807726	0.291741974749545	0.278693455823724	247	tags=50%, list=8%, signal=46%	RPS19/RPS5/RPS27L/PRKDC
GO:1903313	BP	GO:1903313	positive regulation of mRNA metabolic process	48	-0.558877990198708	-1.82949827698422	0.0114382610461094	0.29472090799326	0.281539152611346	762	tags=35%, list=25%, signal=27%	DCPS/FXR2/ELAVL1/CDC73/SYNCRIP/MOV10/FXR1/CNOT2/GTPBP1/CSDE1/HNRNPD/CNOT1/RBMX/TRA2B/SNRNP70/RBM3/ALKBH5
GO:0019229	BP	GO:0019229	regulation of vasoconstriction	12	-0.680007127559188	-1.64016988723431	0.0114204723902482	0.29472090799326	0.281539152611346	208	tags=33%, list=7%, signal=31%	CAV1/FGG/FGB/FGA
GO:1901361	BP	GO:1901361	organic cyclic compound catabolic process	173	-0.38752938813754	-1.4928873725727	0.0114376484626427	0.29472090799326	0.281539152611346	648	tags=23%, list=21%, signal=19%	MOV10/FXR1/FOXK1/FBP1/ADPGK/PPP1R8/HNRNPAB/MTPAP/CNOT2/GTPBP1/CSDE1/HNRNPD/DHX34/TAF15/GIT1/SLC4A1/ENO2/FEN1/CNOT1/RBM10/SUCLG2/EXOG/RBM8A/XRN2/APAF1/MTOR/PDXP/MTREX/ELAC2/IGF2BP2/AMBP/SLIRP/SLC4A4/TRNT1/CARHSP1/COMT/CASC3/DUT/MYD88/ALKBH5
GO:0045103	BP	GO:0045103	intermediate filament-based process	14	0.620541225869973	1.71886278071915	0.0120023667913841	0.296731410767676	0.283459733174449	142	tags=21%, list=5%, signal=21%	DES/SYNM/GFAP
GO:0045104	BP	GO:0045104	intermediate filament cytoskeleton organization	14	0.620541225869973	1.71886278071915	0.0120023667913841	0.296731410767676	0.283459733174449	142	tags=21%, list=5%, signal=21%	DES/SYNM/GFAP
GO:0071621	BP	GO:0071621	granulocyte chemotaxis	28	0.503130799499664	1.68763423794873	0.0119144232857415	0.296731410767676	0.283459733174449	139	tags=14%, list=5%, signal=14%	S100A12/S100A9/ANXA1/BSG
GO:0000794	CC	GO:0000794	condensed nuclear chromosome	16	-0.643893503650734	-1.6759990905146	0.0118754625224	0.296731410767676	0.283459733174449	663	tags=56%, list=22%, signal=44%	SMC1A/SMC3/CHMP1A/SMC2/RAD21/RAD50/NCAPD2/SMC4/NCAPG
GO:0001838	BP	GO:0001838	embryonic epithelial tube formation	19	-0.615835026336259	-1.65484498252352	0.0118054007966042	0.296731410767676	0.283459733174449	480	tags=37%, list=16%, signal=31%	CTNNB1/HS2ST1/CASP3/BRD2/APAF1/PLXNB2/TMED2
GO:0002832	BP	GO:0002832	negative regulation of response to biotic stimulus	29	0.48345340481819	1.63006854631486	0.0119508588309578	0.296731410767676	0.283459733174449	381	tags=34%, list=12%, signal=30%	ARG1/LTF/ISG15/FGL2/GIGYF2/TRIM21/SAMHD1/LGALS9/GRN/YWHAZ
GO:0050777	BP	GO:0050777	negative regulation of immune response	48	0.425632022355674	1.62552342298572	0.0118991289230226	0.296731410767676	0.283459733174449	390	tags=33%, list=13%, signal=30%	ARG1/ALOX15/ANXA1/ISG15/FGL2/GIGYF2/TRIM21/COL3A1/SAMHD1/PSMB4/STAT6/GPX1/LGALS9/GRN/YWHAZ/MAPK14
GO:0000377	BP	GO:0000377	RNA splicing, via transesterification reactions with bulged adenosine as nucleophile	132	-0.423604686706609	-1.58604367934321	0.0119240116584708	0.296731410767676	0.283459733174449	869	tags=40%, list=28%, signal=30%	SON/HTATSF1/THRAP3/LSM3/SART1/HNRNPL/DCPS/RALY/RBM14/SRSF1/SYNCRIP/DDX46/GEMIN5/SNRPF/DDX42/CDC40/SRSF7/CRNKL1/SRSF3/SNRNP200/HNRNPM/SDE2/SRSF10/CDC5L/EFTUD2/DDX17/SMU1/SNRPD3/HNRNPA2B1/SRSF5/U2AF2/RBM10/DDX23/SRSF2/SRSF6/PRPF4/RBM8A/RBMX/RBM39/MTREX/PNN/SNRPG/TRA2B/SNRNP70/HNRNPA3/DDX39B/RBM22/RBM3/BCAS2/SRSF4/CASC3/SNRPN/CELF2
GO:0000398	BP	GO:0000398	mRNA splicing, via spliceosome	132	-0.423604686706609	-1.58604367934321	0.0119240116584708	0.296731410767676	0.283459733174449	869	tags=40%, list=28%, signal=30%	SON/HTATSF1/THRAP3/LSM3/SART1/HNRNPL/DCPS/RALY/RBM14/SRSF1/SYNCRIP/DDX46/GEMIN5/SNRPF/DDX42/CDC40/SRSF7/CRNKL1/SRSF3/SNRNP200/HNRNPM/SDE2/SRSF10/CDC5L/EFTUD2/DDX17/SMU1/SNRPD3/HNRNPA2B1/SRSF5/U2AF2/RBM10/DDX23/SRSF2/SRSF6/PRPF4/RBM8A/RBMX/RBM39/MTREX/PNN/SNRPG/TRA2B/SNRNP70/HNRNPA3/DDX39B/RBM22/RBM3/BCAS2/SRSF4/CASC3/SNRPN/CELF2
GO:0031010	CC	GO:0031010	ISWI-type complex	4	-0.890497885945732	-1.57802724311128	0.0119366906986846	0.296731410767676	0.283459733174449	70	tags=50%, list=2%, signal=49%	BAZ1B/BAZ1A
GO:0060009	BP	GO:0060009	Sertoli cell development	3	0.908811571967756	1.57762707312465	0.0115690305551879	0.296731410767676	0.283459733174449	327	tags=75%, list=11%, signal=67%	FLNA/FNDC3A/FLNA
GO:0045765	BP	GO:0045765	regulation of angiogenesis	58	0.387977426684115	1.51603002606452	0.0116912031031299	0.296731410767676	0.283459733174449	519	tags=26%, list=17%, signal=22%	RHOB/CHI3L1/HSPB1/RRAS/PDCD6/ITGA5/HSPB6/ERAP1/PGK1/GRN/ATP2B4/PDCL3/PKM/PTGIS/NIBAN2
GO:0051094	BP	GO:0051094	positive regulation of developmental process	216	0.273427846602416	1.31207761053849	0.0118147903150415	0.296731410767676	0.283459733174449	519	tags=22%, list=17%, signal=20%	RHOB/FLNA/PCP4/LOXL2/LTF/CREB1/TCF4/ANXA1/CHI3L1/HSPB1/CFL1/TGM2/RRAS/LAMC1/GFAP/ISG15/GLIPR2/NME2/PDCD6/CLIC1/ITGA5/HSPB6/MAP1B/TWF2/MAP2K2/FMR1/NFKB1/ERAP1/COL1A1/STAT6/TMEM119/FLNA/LGALS9/FN1/GRN/IST1/FES/MAPK14/SMARCB1/PDCL3/PKM/MCU/PTGIS/PROC/SOD2/LAMB1/ADD1/TGFB1/NIBAN2
GO:0006913	BP	GO:0006913	nucleocytoplasmic transport	115	-0.424856731308237	-1.55540085028983	0.0121279680739974	0.297980045310352	0.284652521000259	447	tags=15%, list=15%, signal=13%	CHP1/NEMF/SEC13/HNRNPA2B1/CHP2/MCM3AP/RPL23/RBM8A/CDH1/UBR5/WASHC4/DDX39B/RBM22/ALYREF/CASC3/SUPT6H/ALKBH5
GO:0051169	BP	GO:0051169	nuclear transport	115	-0.424856731308237	-1.55540085028983	0.0121279680739974	0.297980045310352	0.284652521000259	447	tags=15%, list=15%, signal=13%	CHP1/NEMF/SEC13/HNRNPA2B1/CHP2/MCM3AP/RPL23/RBM8A/CDH1/UBR5/WASHC4/DDX39B/RBM22/ALYREF/CASC3/SUPT6H/ALKBH5
GO:0050786	MF	GO:0050786	RAGE receptor binding	6	0.807638084113344	1.7200207812528	0.0122771760646584	0.29818187295198	0.284845321652185	10	tags=33%, list=0%, signal=33%	S100A12/S100A9
GO:0046337	BP	GO:0046337	phosphatidylethanolamine metabolic process	3	0.90741107692916	1.57519592132507	0.0122864758638227	0.29818187295198	0.284845321652185	75	tags=33%, list=2%, signal=33%	ALOX15
GO:0030952	BP	GO:0030952	establishment or maintenance of cytoskeleton polarity	3	0.907398525777806	1.57517413349051	0.0122864758638227	0.29818187295198	0.284845321652185	33	tags=33%, list=1%, signal=33%	LMNA
GO:0035295	BP	GO:0035295	tube development	190	0.286441207602677	1.34328501679032	0.0122537237958235	0.29818187295198	0.284845321652185	402	tags=20%, list=13%, signal=18%	RHOB/FLNA/CDC42/LOXL2/CREB1/MYLK/COL2A1/ANXA1/CHI3L1/PARVA/CLIC4/HSPB1/MARCKS/TGM2/LTA4H/RRAS/BSG/PDCD6/ITGA5/HDAC7/HSPB6/CALD1/GPLD1/MAP2K2/COL3A1/ACTG1/ERAP1/GPX1/CD47/FLNA/FN1/PGK1/GRN/COL15A1/ATP2B4/MAPK14/COL6A1/ITPK1
GO:0034121	BP	GO:0034121	regulation of toll-like receptor signaling pathway	7	0.786612533134665	1.73487916700072	0.0124060787743495	0.300166588881823	0.28674126871908	239	tags=43%, list=8%, signal=40%	S100A9/CD300LF/SARM1
GO:0051371	MF	GO:0051371	muscle alpha-actinin binding	8	0.750920955416282	1.72270171987187	0.0126420595478541	0.304946457664955	0.291307351987347	358	tags=56%, list=12%, signal=49%	PDLIM7/SYNPO2/PDLIM3/PALLD/PDLIM7
GO:0019003	MF	GO:0019003	GDP binding	24	0.54457021837746	1.76709280962576	0.0127572326273202	0.305865251149284	0.292185051302147	511	tags=38%, list=17%, signal=32%	RHOB/RRAS/RAB12/NME2/RAP1B/RAB18/ARL8B/RAB10/RAB27A
GO:0032154	CC	GO:0032154	cleavage furrow	17	0.590569007681001	1.73155264792489	0.012750724083161	0.305865251149284	0.292185051302147	62	tags=12%, list=2%, signal=12%	RHOB/MYLK
GO:0051764	BP	GO:0051764	actin crosslink formation	5	0.84297501316266	1.69976381556818	0.0130263619466571	0.311377133761056	0.297450408179532	327	tags=67%, list=11%, signal=60%	FLNA/MARCKS/DPYSL3/FLNA
GO:0035580	CC	GO:0035580	specific granule lumen	32	0.496796093472472	1.72038193463224	0.0133938511677894	0.316483445034272	0.302328333395695	154	tags=25%, list=5%, signal=24%	ARG1/OLFM4/ELANE/LTF/CHI3L1/LCN2/CNN2/VCL
GO:0016331	BP	GO:0016331	morphogenesis of embryonic epithelium	21	-0.600121004150407	-1.65867782797963	0.0133539886922229	0.316483445034272	0.302328333395695	480	tags=33%, list=16%, signal=28%	CTNNB1/HS2ST1/CASP3/BRD2/APAF1/PLXNB2/TMED2
GO:0007389	BP	GO:0007389	pattern specification process	18	-0.614395978157828	-1.64281294420344	0.0133928649329571	0.316483445034272	0.302328333395695	603	tags=39%, list=20%, signal=31%	NCLN/POGLUT1/CTNNB1/C1QA/TRA2B/TMED2/PRKDC
GO:0030330	BP	GO:0030330	DNA damage response, signal transduction by p53 class mediator	12	-0.67695559829333	-1.63280963142369	0.0133995006970155	0.316483445034272	0.302328333395695	752	tags=50%, list=24%, signal=38%	KDM1A/NDRG1/RPL26/MIF/MYO6/RPS27L
GO:0051014	BP	GO:0051014	actin filament severing	11	0.685963417125256	1.78052066119349	0.0135246380866931	0.316612176566362	0.302451307251557	106	tags=36%, list=3%, signal=35%	DSTN/CFL2/CAPG/CFL1
GO:0005862	CC	GO:0005862	muscle thin filament tropomyosin	4	0.889342450529236	1.6675767508665	0.0135081028983028	0.316612176566362	0.302451307251557	32	tags=40%, list=1%, signal=40%	TPM1/TPM2
GO:0070071	BP	GO:0070071	proton-transporting two-sector ATPase complex assembly	4	0.887573957693137	1.66426070817024	0.0135081028983028	0.316612176566362	0.302451307251557	253	tags=75%, list=8%, signal=69%	VMA21/ALDOB/ATP5F1D
GO:0031089	CC	GO:0031089	platelet dense granule lumen	8	-0.755645649752997	-1.63890015376247	0.013568579570164	0.316706610202416	0.302541517227001	532	tags=78%, list=17%, signal=65%	SPP2/FAM3C/ITIH4/ITIH3/ITIH4/LGALS3BP/CLEC3B
GO:0061695	CC	GO:0061695	transferase complex, transferring phosphorus-containing groups	53	-0.498259419808207	-1.65596789490836	0.0137901036686824	0.32093332174388	0.306579183892114	390	tags=28%, list=13%, signal=25%	CDK1/CDK5/TBC1D5/CSNK2A1/MCM3/CCNK/PRPSAP2/POLD1/POLR2E/RPAP1/POLR2K/PRPS1/PRPS2/CDK4/PRKDC
GO:0042117	BP	GO:0042117	monocyte activation	4	0.885596384384576	1.66055262556322	0.0138859458554183	0.32166840240027	0.307281387161336	336	tags=50%, list=11%, signal=45%	AZU1/FN1
GO:0080025	MF	GO:0080025	phosphatidylinositol-3,5-bisphosphate binding	4	-0.882532712256867	-1.56391237403016	0.0139027547912415	0.32166840240027	0.307281387161336	186	tags=50%, list=6%, signal=47%	GBF1/HIP1R
GO:0014812	BP	GO:0014812	muscle cell migration	18	0.59604041212495	1.76188352517796	0.0140602331978771	0.324366310053352	0.30985862757378	98	tags=21%, list=3%, signal=21%	TPM1/S100A11/POSTN/PARVA
GO:0051983	BP	GO:0051983	regulation of chromosome segregation	32	-0.571747398843302	-1.73847889209204	0.0142431945223674	0.32668783736852	0.31207632172221	743	tags=53%, list=24%, signal=41%	ZW10/SMC5/TPR/BUB3/CDK1/CDC27/SMC2/RAD21/CSNK2A1/ARID1A/PLSCR1/TRIP13/SMARCD1/MKI67/NCAPD2/SMC4/NCAPG
GO:0050709	BP	GO:0050709	negative regulation of protein secretion	9	-0.735967198523195	-1.65761987229393	0.0142208627649792	0.32668783736852	0.31207632172221	637	tags=56%, list=21%, signal=44%	PTPN11/APOE/CHGA/CD200/ERP29
GO:0003002	BP	GO:0003002	regionalization	16	-0.632278657175386	-1.64576664987219	0.0143170813854865	0.327436189842136	0.312791203210296	603	tags=44%, list=20%, signal=35%	NCLN/POGLUT1/CTNNB1/C1QA/TRA2B/TMED2/PRKDC
GO:0071347	BP	GO:0071347	cellular response to interleukin-1	21	-0.59394489871187	-1.64160765532559	0.0144396558103424	0.329290541697924	0.314562616896812	274	tags=24%, list=9%, signal=22%	RBMX/FGG/FGB/MYD88/RPS6KA5
GO:0106310	MF	GO:0106310	protein serine kinase activity	53	-0.494071863542995	-1.64205052885839	0.014583765380699	0.330676463032078	0.315886551193366	241	tags=19%, list=8%, signal=18%	MTOR/STK38L/PRKCB/ARAF/MAP4K1/CDK4/AKT2/TP53RK/PRKDC/RPS6KA5
GO:0050900	BP	GO:0050900	leukocyte migration	87	0.348400604946977	1.46260586730886	0.0145566271207309	0.330676463032078	0.315886551193366	139	tags=13%, list=5%, signal=12%	S100A12/S100A9/CDC42/PRTN3/AZU1/ELANE/CD177/ANXA1/CNN2/DDT/BSG
GO:0141060	BP	GO:0141060	disruption of anatomical structure in another organism	24	0.534220982642285	1.73351025326188	0.0150979486805125	0.330842794811876	0.316045443579575	46	tags=21%, list=1%, signal=21%	ARG1/S100A12/AZU1/ELANE/LTF
GO:0019730	BP	GO:0019730	antimicrobial humoral response	21	0.536550240205816	1.67615345548102	0.014863507711215	0.330842794811876	0.316045443579575	46	tags=29%, list=1%, signal=28%	S100A12/S100A9/PRTN3/AZU1/ELANE/LTF
GO:1905244	BP	GO:1905244	regulation of modification of synaptic structure	4	0.883988029275593	1.65753685184717	0.014830553915945	0.330842794811876	0.316045443579575	24	tags=50%, list=1%, signal=50%	RHOB/CDC42
GO:1905820	BP	GO:1905820	positive regulation of chromosome separation	7	-0.793416534372038	-1.65270151021689	0.0147717267619147	0.330842794811876	0.316045443579575	468	tags=71%, list=15%, signal=61%	SMC2/PLSCR1/NCAPD2/SMC4/NCAPG
GO:0048025	BP	GO:0048025	negative regulation of mRNA splicing, via spliceosome	12	-0.673220462958439	-1.62380052511767	0.0150307053797787	0.330842794811876	0.316045443579575	607	tags=67%, list=20%, signal=54%	SRSF7/SRSF10/HNRNPA2B1/U2AF2/RBM10/SRSF6/RBMX/SRSF4
GO:0050686	BP	GO:0050686	negative regulation of mRNA processing	12	-0.673220462958439	-1.62380052511767	0.0150307053797787	0.330842794811876	0.316045443579575	607	tags=67%, list=20%, signal=54%	SRSF7/SRSF10/HNRNPA2B1/U2AF2/RBM10/SRSF6/RBMX/SRSF4
GO:0097529	BP	GO:0097529	myeloid leukocyte migration	55	0.400682710269794	1.56627683346518	0.0148588398874929	0.330842794811876	0.316045443579575	139	tags=16%, list=5%, signal=16%	S100A12/S100A9/PRTN3/AZU1/CD177/ANXA1/CNN2/DDT/BSG
GO:0016778	MF	GO:0016778	diphosphotransferase activity	4	-0.880381174206285	-1.56009969158364	0.0151330562647065	0.330842794811876	0.316045443579575	231	tags=75%, list=8%, signal=69%	PRPSAP2/PRPS1/PRPS2
GO:0140996	MF	GO:0140996	histone H3 kinase activity	3	-0.914590039506218	-1.50761894545192	0.0149098535732091	0.330842794811876	0.316045443579575	189	tags=67%, list=6%, signal=63%	PRKCB/RPS6KA5
GO:0006935	BP	GO:0006935	chemotaxis	79	0.361022839500464	1.49529508978557	0.0150850545507143	0.330842794811876	0.316045443579575	139	tags=13%, list=5%, signal=12%	S100A12/S100A9/AZU1/ELANE/ANXA1/PARVA/HSPB1/APOA1/DDT/BSG
GO:0042330	BP	GO:0042330	taxis	79	0.361022839500464	1.49529508978557	0.0150850545507143	0.330842794811876	0.316045443579575	139	tags=13%, list=5%, signal=12%	S100A12/S100A9/AZU1/ELANE/ANXA1/PARVA/HSPB1/APOA1/DDT/BSG
GO:0003677	MF	GO:0003677	DNA binding	272	-0.346643743132271	-1.3831722548908	0.0150573412433036	0.330842794811876	0.316045443579575	934	tags=36%, list=30%, signal=28%	MNT/AIFM1/MCM6/DEK/FUS/HUWE1/SAFB/ADAR/ZBP1/CGGBP1/SON/THRAP3/LONP1/XRCC1/TAF7/CUX1/BCLAF1/RIGI/MCM7/POLR2A/HNRNPL/PREB/ZW10/SMC5/OGT/PCBP1/CHD4/GTF3C1/PDCD5/SMC1A/FOXK1/MAFG/SMC3/CHD3/WRNIP1/PPP1R8/NFYC/ADNP/RECQL/GATAD2B/SMCHD1/SWAP70/H3C1/HNRNPD/IGHM/SDE2/CDC5L/SMC2/RAD21/TAF15/UBTF/HNF4A/HNRNPA2B1/MCM3/XPC/ARID1A/FEN1/TOP2B/H2AC18/WDR76/MCM4/PLSCR1/SP140/ZNF326/RAD50/AKAP9/MSH2/MEF2D/XRN2/RBM…
GO:0009890	BP	GO:0009890	negative regulation of biosynthetic process	407	-0.323974477983338	-1.3252075090894	0.015007367256989	0.330842794811876	0.316045443579575	711	tags=27%, list=23%, signal=24%	RPS14/MEPCE/DCPS/FXR2/KDM1A/OGT/RALY/CHD4/ELAVL1/CDC73/RAN/TPR/SYNCRIP/INPP5D/DDRGK1/DDX21/NDUFA13/MRPL13/ANXA4/SERPINF2/MOV10/FXR1/FOXK1/PTPN11/CTSZ/MAFG/CHD3/ERLIN2/DHRS7B/APOE/SRSF7/FBP1/PRMT3/CHMP1A/ADNP/SRSF3/HNRNPAB/GATAD2B/MTPAP/CDK1/SMCHD1/CNOT2/CTBP1/GTPBP1/CSDE1/HNRNPD/CDK5/SNX12/CTNNB1/DHX34/SRSF10/RAD21/TAF15/DDX17/SHMT1/GIT1/PPM1B/NCOA5/PSMC5/STRN3/HNF4A/CD22/EPRS1/SCAF8/CSNK2A1/HNRN…
GO:0031344	BP	GO:0031344	regulation of cell projection organization	123	0.320901223522026	1.40290724820497	0.0152256823263558	0.331953337752635	0.317106316120342	385	tags=19%, list=13%, signal=18%	FLNA/S100A9/CDC42/TWF1/CFL1/GFAP/NME2/MIEN1/SPP1/MAP1B/WASHC5/TWF2/YWHAH/SARM1/MAP2K2/FMR1/DPYSL3/ACTR2/FLNA/FN1/MAP4/GRN/IST1/FES
GO:0016813	MF	GO:0016813	hydrolase activity, acting on carbon-nitrogen (but not peptide) bonds, in linear amidines	3	0.90114684834907	1.56432170173432	0.015335625486993	0.332754604803988	0.317871745516543	5	tags=33%, list=0%, signal=33%	ARG1
GO:0071705	BP	GO:0071705	nitrogen compound transport	485	-0.314631261381923	-1.29593811205323	0.0153462935179258	0.332754604803988	0.317871745516543	761	tags=27%, list=25%, signal=24%	PREB/SEC24A/FXR2/VPS36/RAB2A/ZW10/TOMM7/SFXN5/SCRIB/GGA3/SRSF1/ELAVL1/RAN/TOM1/TPR/NDUFA13/SLC35A3/TIMM9/PDCD5/ARHGEF2/UBAC2/MYO5B/FXR1/SFXN1/PTPN11/KIF5B/SNX2/EHD3/APOE/SRSF7/WNK1/PDZK1/PGRMC1/LTBP2/TNPO3/CHMP1A/ARFIP1/SRSF3/GNPTAB/CDK1/SORL1/SRPRA/VPS37C/CDK5/VTI1A/SNX12/VTA1/RABEP1/CELA2A/STX7/G3BP2/CTSA/MIA2/CHP1/EXOC2/SEC61B/GNA11/SEC13/VPS51/HNF4A/CHGA/TBC1D5/HNRNPA2B1/EIPR1/MIA3/EXOC5/COPE…
GO:0006882	BP	GO:0006882	intracellular zinc ion homeostasis	3	0.900729100431321	1.56359652344092	0.0155149874950279	0.334584078153646	0.319619393418739	10	tags=33%, list=0%, signal=33%	S100A9
GO:0032060	BP	GO:0032060	bleb assembly	3	0.900697470788188	1.56354161681026	0.0155149874950279	0.334584078153646	0.319619393418739	62	tags=33%, list=2%, signal=33%	MYLK
GO:0002820	BP	GO:0002820	negative regulation of adaptive immune response	7	0.776570563631712	1.71273153655691	0.0156336127370544	0.335715250241468	0.320699972442574	75	tags=29%, list=2%, signal=28%	ARG1/ALOX15
GO:0002829	BP	GO:0002829	negative regulation of type 2 immune response	3	0.900390625	1.56300895609417	0.0156943495261574	0.335715250241468	0.320699972442574	309	tags=100%, list=10%, signal=90%	ARG1/ANXA1/STAT6
GO:0042110	BP	GO:0042110	T cell activation	97	-0.420131312576489	-1.50648209621086	0.0156860972601268	0.335715250241468	0.320699972442574	480	tags=16%, list=16%, signal=14%	CTNNB1/CTPS1/FKBP1A/FADD/SLC4A2/ARID1A/SPTA1/CASP3/BRD2/SMARCD1/MTOR/ERBB2/CAV1/NCK1/PRKDC/ALKBH5
GO:0046332	MF	GO:0046332	SMAD binding	15	0.609916179666016	1.7207934516678	0.0166763586191753	0.337496606531701	0.322401655380055	327	tags=24%, list=11%, signal=21%	FLNA/FKBP1A/COL3A1/FLNA
GO:0090665	CC	GO:0090665	glycoprotein complex	7	0.774368966948059	1.70787590044674	0.0162387766035027	0.337496606531701	0.322401655380055	411	tags=62%, list=13%, signal=54%	FLNA/PGM5/FLNA/SNTA1/DMD
GO:0051489	BP	GO:0051489	regulation of filopodium assembly	13	0.627860076419628	1.70496500346936	0.0168791790611057	0.337496606531701	0.322401655380055	611	tags=46%, list=20%, signal=37%	CDC42/MIEN1/FMR1/DPYSL3/AGRN/CAPZB
GO:0031103	BP	GO:0031103	axon regeneration	13	0.627075971876035	1.70283575388637	0.0168791790611057	0.337496606531701	0.322401655380055	361	tags=43%, list=12%, signal=38%	FLNA/SPP1/MAP1B/MAP2K2/FLNA/GRN
GO:0005865	CC	GO:0005865	striated muscle thin filament	7	0.771484943676394	1.70151516796359	0.0170456622051274	0.337496606531701	0.322401655380055	84	tags=38%, list=3%, signal=37%	TPM1/TPM2/ACTA1
GO:0036379	CC	GO:0036379	myofilament	7	0.771484943676394	1.70151516796359	0.0170456622051274	0.337496606531701	0.322401655380055	84	tags=38%, list=3%, signal=37%	TPM1/TPM2/ACTA1
GO:0045930	BP	GO:0045930	negative regulation of mitotic cell cycle	35	-0.551510575733546	-1.69458780668949	0.0159364624594885	0.337496606531701	0.322401655380055	743	tags=58%, list=24%, signal=45%	ZW10/SCRIB/CDC73/TPR/BUB3/CDK1/SDE2/BABAM1/CTNNB1/RAD21/XPC/BRCC3/TOM1L2/RAD50/RPL26/MSH2/TRIP13/USP47/CRLF3/RPS27L/PRKDC
GO:0010614	BP	GO:0010614	negative regulation of cardiac muscle hypertrophy	6	0.7924117876207	1.68759345160599	0.0173039625108062	0.337496606531701	0.322401655380055	378	tags=33%, list=12%, signal=29%	LMNA/ATP2B4
GO:0014741	BP	GO:0014741	negative regulation of muscle hypertrophy	6	0.7924117876207	1.68759345160599	0.0173039625108062	0.337496606531701	0.322401655380055	378	tags=33%, list=12%, signal=29%	LMNA/ATP2B4
GO:0048644	BP	GO:0048644	muscle organ morphogenesis	10	0.685021977556458	1.68280973211057	0.0162312173413398	0.337496606531701	0.322401655380055	266	tags=33%, list=9%, signal=31%	TPM1/MYLK/FKBP1A/COL3A1
GO:0060415	BP	GO:0060415	muscle tissue morphogenesis	10	0.685021977556458	1.68280973211057	0.0162312173413398	0.337496606531701	0.322401655380055	266	tags=33%, list=9%, signal=31%	TPM1/MYLK/FKBP1A/COL3A1
GO:0043034	CC	GO:0043034	costamere	10	0.683081485049468	1.67804276143979	0.0170582748280239	0.337496606531701	0.322401655380055	440	tags=60%, list=14%, signal=52%	FLNC/SYNM/PGM5/VCL/DMD/SVIL
GO:0035601	BP	GO:0035601	protein deacylation	12	0.635832686154629	1.67660898374632	0.0160244530554808	0.337496606531701	0.322401655380055	446	tags=46%, list=15%, signal=40%	FLNA/ABHD10/HDAC7/PPT1/FLNA/LYPLA1
GO:0002828	BP	GO:0002828	regulation of type 2 immune response	5	0.830890142927187	1.67539604093507	0.0171398817193561	0.337496606531701	0.322401655380055	309	tags=60%, list=10%, signal=54%	ARG1/ANXA1/STAT6
GO:0042092	BP	GO:0042092	type 2 immune response	5	0.830890142927187	1.67539604093507	0.0171398817193561	0.337496606531701	0.322401655380055	309	tags=60%, list=10%, signal=54%	ARG1/ANXA1/STAT6
GO:0045921	BP	GO:0045921	positive regulation of exocytosis	27	-0.566092665166364	-1.66507412153139	0.0161708222015398	0.337496606531701	0.322401655380055	168	tags=26%, list=5%, signal=25%	RAB3D/FGG/HGS/FGB/AP1G1/VAMP8/FGA
GO:0005080	MF	GO:0005080	protein kinase C binding	21	0.528999134631256	1.652564216761	0.0172416217135598	0.337496606531701	0.322401655380055	332	tags=36%, list=11%, signal=33%	FLNA/HSPB1/MARCKS/HDAC7/TWF2/TOP2A/FLNA/YWHAG
GO:0030501	BP	GO:0030501	positive regulation of bone mineralization	4	0.880165113709581	1.65036862872388	0.0163419284528848	0.337496606531701	0.322401655380055	323	tags=75%, list=11%, signal=67%	LTF/ISG15/TMEM119
GO:0051393	MF	GO:0051393	alpha-actinin binding	9	0.698895009756903	1.63866880003058	0.0172985322199679	0.337496606531701	0.322401655380055	358	tags=50%, list=12%, signal=44%	PDLIM7/SYNPO2/PDLIM3/PALLD/PDLIM7
GO:0070192	BP	GO:0070192	chromosome organization involved in meiotic cell cycle	7	-0.78201851690942	-1.62895922623631	0.0164261266448444	0.337496606531701	0.322401655380055	468	tags=71%, list=15%, signal=61%	SMC2/RAD50/TRIP13/NCAPD2/SMC4
GO:0004520	MF	GO:0004520	DNA endonuclease activity	7	-0.778548593080565	-1.62173130987228	0.0166624697424699	0.337496606531701	0.322401655380055	357	tags=71%, list=12%, signal=63%	XRCC1/FEN1/RAD50/EXOG/ERCC4
GO:0070661	BP	GO:0070661	leukocyte proliferation	62	-0.477485570856796	-1.61763541100451	0.0166122397785833	0.337496606531701	0.322401655380055	480	tags=19%, list=16%, signal=17%	CTNNB1/CTPS1/CD22/FADD/SLC4A2/SPTA1/CASP3/ERBB2/NCK1/MIF/MYD88/ALKBH5
GO:0006782	BP	GO:0006782	protoporphyrinogen IX biosynthetic process	3	0.896018388422353	1.55541908927495	0.0173086087271172	0.337496606531701	0.322401655380055	300	tags=67%, list=10%, signal=60%	PPOX/UROD
GO:0006784	BP	GO:0006784	heme A biosynthetic process	3	0.896018388422353	1.55541908927495	0.0173086087271172	0.337496606531701	0.322401655380055	300	tags=67%, list=10%, signal=60%	PPOX/UROD
GO:0006785	BP	GO:0006785	heme B biosynthetic process	3	0.896018388422353	1.55541908927495	0.0173086087271172	0.337496606531701	0.322401655380055	300	tags=67%, list=10%, signal=60%	PPOX/UROD
GO:0046160	BP	GO:0046160	heme a metabolic process	3	0.896018388422353	1.55541908927495	0.0173086087271172	0.337496606531701	0.322401655380055	300	tags=67%, list=10%, signal=60%	PPOX/UROD
GO:0046492	BP	GO:0046492	heme B metabolic process	3	0.896018388422353	1.55541908927495	0.0173086087271172	0.337496606531701	0.322401655380055	300	tags=67%, list=10%, signal=60%	PPOX/UROD
GO:0046501	BP	GO:0046501	protoporphyrinogen IX metabolic process	3	0.896018388422353	1.55541908927495	0.0173086087271172	0.337496606531701	0.322401655380055	300	tags=67%, list=10%, signal=60%	PPOX/UROD
GO:0048033	BP	GO:0048033	heme O metabolic process	3	0.896018388422353	1.55541908927495	0.0173086087271172	0.337496606531701	0.322401655380055	300	tags=67%, list=10%, signal=60%	PPOX/UROD
GO:0048034	BP	GO:0048034	heme O biosynthetic process	3	0.896018388422353	1.55541908927495	0.0173086087271172	0.337496606531701	0.322401655380055	300	tags=67%, list=10%, signal=60%	PPOX/UROD
GO:0000302	BP	GO:0000302	response to reactive oxygen species	57	0.396723074287366	1.54728609340589	0.0168331949190366	0.337496606531701	0.322401655380055	430	tags=20%, list=14%, signal=18%	RHOB/TPM1/MMP9/MPO/SOD3/COL1A1/STAT6/FABP1/GPX1/COL6A1/SIRPA/CRYAB
GO:0070008	MF	GO:0070008	serine-type exopeptidase activity	6	-0.784719079263137	-1.54005215980147	0.0168520877896054	0.337496606531701	0.322401655380055	612	tags=83%, list=20%, signal=67%	DPP7/CPD/TPP1/CTSA/TPP2
GO:0004672	MF	GO:0004672	protein kinase activity	83	-0.424648688130305	-1.49401511294547	0.0160161265341641	0.337496606531701	0.322401655380055	385	tags=28%, list=13%, signal=25%	CDK19/LTBP4/WNK1/CDK1/CDK5/PDGFRB/CSNK2A1/CCNK/EFEMP1/BRD2/GRK2/MTOR/STK38L/ERBB2/PRKCB/ARAF/PPP1R9B/MAP4K1/CDK4/AKT2/TP53RK/PRKDC/RPS6KA5
GO:0046914	MF	GO:0046914	transition metal ion binding	177	0.292891057907752	1.36262864788151	0.0169627658687736	0.337496606531701	0.322401655380055	120	tags=9%, list=4%, signal=10%	PLOD1/ARG1/CUL9/S100A12/S100A9/S100A2/S100A6/LOXL2/LTF/CLIP1/TES/CSRP1/ALOX15/MMP9/LCN2/LTA4H/ALB
GO:0051173	BP	GO:0051173	positive regulation of nitrogen compound metabolic process	543	-0.309110779975247	-1.2764523089604	0.0168080615630505	0.337496606531701	0.322401655380055	726	tags=25%, list=24%, signal=23%	RBM14/PCBP1/ITGA1/CHD4/SRSF1/TRMT112/AIMP2/RNF40/EHD4/ELAVL1/CDC73/SYNCRIP/TRIM25/DDRGK1/DDX21/NDUFA13/RPS4X/PDCD5/ARHGEF2/SERPINF2/MOV10/FXR1/FOXK1/ITGA6/PTPN11/MAFG/TAB1/CHD3/APOE/PELP1/WNK1/PRRC1/PLCG2/UBQLN1/NFYC/ADNP/HNRNPAB/GATAD2B/CDK1/SORL1/SMCHD1/CNOT2/CTBP1/GTPBP1/CSDE1/HNRNPD/MRPS27/CCT3/DIP2B/LMO7/PDGFRB/BABAM1/CTNNB1/RDX/CDC5L/TAF15/UBTF/DDX17/CHP1/PSMC5/HNF4A/NIBAN1/FADD/SCAF8/CSNK2…
GO:0010556	BP	GO:0010556	regulation of macromolecule biosynthetic process	795	-0.293589268906778	-1.2218969737304	0.0159782265760766	0.337496606531701	0.322401655380055	726	tags=24%, list=24%, signal=25%	RBM14/PCBP1/CHD4/SRSF1/TRMT112/RNF40/ELAVL1/CDC73/RAN/TPR/SYNCRIP/INPP5D/TRIM25/DDRGK1/DDX21/GCN1/NDUFA13/MRPL13/RPS4X/PDCD5/ARHGEF2/LRRFIP2/ANXA4/GEMIN5/SERPINF2/MOV10/FXR1/FOXK1/ITGA6/PTPN11/CTSZ/MAFG/CHD3/DHRS7B/APOE/SRSF7/PELP1/WNK1/FBP1/FCN1/PLCG2/CHMP1A/NFYC/ADNP/SRSF3/HNRNPAB/GATAD2B/MTPAP/CDK1/SORL1/SMCHD1/CNOT2/CTBP1/GTPBP1/CSDE1/H3C1/HNRNPD/MRPS27/CCT3/LMO7/CDK5/PDGFRB/SNX12/CTNNB1/G3BP…
GO:0000781	CC	GO:0000781	chromosome, telomeric region	46	-0.523940150746301	-1.70649851487214	0.017883382334649	0.337808306194749	0.322699413892002	840	tags=48%, list=27%, signal=35%	XRCC1/THOC6/MCM7/KDM1A/SMC5/CHD4/CDC73/WRNIP1/GATAD2B/CDK1/SMCHD1/HNRNPA2B1/MCM3/FEN1/MCM4/RAD50/MSH2/POLD1/HAT1/ALYREF/ERCC4/PRKDC
GO:0051645	BP	GO:0051645	Golgi localization	7	0.769395158288269	1.69690613240842	0.0178525482534779	0.337808306194749	0.322699413892002	381	tags=29%, list=12%, signal=25%	CDC42/YWHAZ
GO:0048679	BP	GO:0048679	regulation of axon regeneration	6	0.79139334311586	1.68542447796874	0.0176906392586698	0.337808306194749	0.322699413892002	361	tags=71%, list=12%, signal=63%	FLNA/SPP1/MAP2K2/FLNA/GRN
GO:0000228	CC	GO:0000228	nuclear chromosome	54	-0.496968480060263	-1.65527925414891	0.0177114380726014	0.337808306194749	0.322699413892002	663	tags=37%, list=22%, signal=30%	SMC1A/SMC3/CHMP1A/SMCHD1/CDC5L/SMC2/RAD21/CSNK2A1/MCM3/MCM4/SRSF2/RAD50/NCAPD2/POLD1/ORC6/UCHL5/SMC4/NCAPG/BAZ1A/BCAS2
GO:0071004	CC	GO:0071004	U2-type prespliceosome	9	-0.727101949441926	-1.63765266033199	0.0174580676296731	0.337808306194749	0.322699413892002	349	tags=50%, list=11%, signal=44%	DDX42/U2AF2/SNRPG/SNRNP70/SNRPN
GO:0071010	CC	GO:0071010	prespliceosome	9	-0.727101949441926	-1.63765266033199	0.0174580676296731	0.337808306194749	0.322699413892002	349	tags=50%, list=11%, signal=44%	DDX42/U2AF2/SNRPG/SNRNP70/SNRPN
GO:0042827	CC	GO:0042827	platelet dense granule	9	-0.725620278739448	-1.6343154914941	0.0179205263240914	0.337808306194749	0.322699413892002	532	tags=70%, list=17%, signal=58%	SPP2/FAM3C/ITIH4/ITIH3/ITIH4/LGALS3BP/CLEC3B
GO:0050708	BP	GO:0050708	regulation of protein secretion	55	-0.487592556673294	-1.62511912312834	0.0177584180144385	0.337808306194749	0.322699413892002	637	tags=33%, list=21%, signal=26%	PTPN11/APOE/ARFIP1/CELA2A/GNA11/HNF4A/CHGA/EIPR1/SLC25A22/CD2AP/CD200/PRKCB/MYO18A/FGG/ERP29/LLGL2/FGB/FGA
GO:0097120	BP	GO:0097120	receptor localization to synapse	12	-0.666536097561948	-1.60767790758284	0.0178270640656058	0.337808306194749	0.322699413892002	738	tags=50%, list=24%, signal=38%	OGT/SCRIB/KIF5B/STX7/ERBB2/GRIPAP1
GO:0045807	BP	GO:0045807	positive regulation of endocytosis	48	0.407016988279508	1.55443108894794	0.0176892696334993	0.337808306194749	0.322699413892002	560	tags=33%, list=18%, signal=28%	CDC42/FCN2/AZU1/AHSG/CLU/APOA1/CD300LF/PPT1/FMR1/CD47/CD151/SIRPA/RAB27A/HNRNPK/LMAN2/ARRB1
GO:0009306	BP	GO:0009306	protein secretion	82	-0.442248868435631	-1.55247934619711	0.0178898231737589	0.337808306194749	0.322699413892002	637	tags=33%, list=21%, signal=27%	PTPN11/APOE/LTBP2/ARFIP1/GNPTAB/CELA2A/MIA2/GNA11/HNF4A/CHGA/EIPR1/MIA3/SLC25A22/CD2AP/CD200/PRKCB/RAB3D/MTTP/MYO18A/COMT/FGG/ERP29/LLGL2/FGB/TMED2/AP1G1/FGA
GO:0035592	BP	GO:0035592	establishment of protein localization to extracellular region	82	-0.442248868435631	-1.55247934619711	0.0178898231737589	0.337808306194749	0.322699413892002	637	tags=33%, list=21%, signal=27%	PTPN11/APOE/LTBP2/ARFIP1/GNPTAB/CELA2A/MIA2/GNA11/HNF4A/CHGA/EIPR1/MIA3/SLC25A22/CD2AP/CD200/PRKCB/RAB3D/MTTP/MYO18A/COMT/FGG/ERP29/LLGL2/FGB/TMED2/AP1G1/FGA
GO:0048050	BP	GO:0048050	post-embryonic eye morphogenesis	4	-0.874959296646044	-1.55049172885413	0.0178397266675095	0.337808306194749	0.322699413892002	389	tags=100%, list=13%, signal=87%	MFAP2/EFEMP1/BAK1
GO:0031589	BP	GO:0031589	cell-substrate adhesion	103	0.319919281975531	1.38527421038433	0.0176197736192342	0.337808306194749	0.322699413892002	403	tags=24%, list=13%, signal=22%	FLNA/CDC42/OLFM4/POSTN/ALOX15/SORBS1/ZYX/PARVA/APOA1/SORBS1/RRAS/LAMC1/VCL/ITGA5/ACTN1/COL3A1/ACTG1/COL1A1/ITGA7/VAMP3/FLNA/FN1/P4HB/RSU1/TLN1/SORBS3
GO:0033555	BP	GO:0033555	multicellular organismal response to stress	15	-0.636336444828814	-1.62294050599488	0.0181103712678214	0.340577977207182	0.325345207959217	241	tags=27%, list=8%, signal=25%	MTOR/COMT/EIF4G1/VWA1
GO:0032784	BP	GO:0032784	regulation of DNA-templated transcription elongation	18	-0.601777793832678	-1.60907360137139	0.018183716841158	0.341148881445461	0.325890577802713	480	tags=39%, list=16%, signal=33%	CDC73/CTNNB1/SCAF8/CCNK/ZNF326/INTS5/SUPT6H
GO:0048525	BP	GO:0048525	negative regulation of viral process	22	0.534474123939733	1.68517421527042	0.0185507003091371	0.343968125358206	0.328583727561253	232	tags=30%, list=8%, signal=28%	MX1/LTF/FAM111A/MX1/ISG15/ZC3HAV1/TRIM21
GO:0014896	BP	GO:0014896	muscle hypertrophy	22	0.534308842837386	1.68465309097371	0.0185507003091371	0.343968125358206	0.328583727561253	445	tags=32%, list=14%, signal=27%	LMNA/TWF1/SORBS2/COL14A1/ATP2B4/ATP2A2/PRKG1
GO:1990266	BP	GO:1990266	neutrophil migration	26	0.489609232782192	1.6131313158097	0.0184351196218528	0.343968125358206	0.328583727561253	139	tags=19%, list=5%, signal=19%	S100A12/S100A9/PRTN3/CD177/BSG
GO:0010642	BP	GO:0010642	negative regulation of platelet-derived growth factor receptor signaling pathway	3	-0.90723151516977	-1.4954890837423	0.0184779451683914	0.343968125358206	0.328583727561253	58	tags=100%, list=2%, signal=98%	ADIPOQ/HGS
GO:0030100	BP	GO:0030100	regulation of endocytosis	91	0.342050434974476	1.46928841138737	0.0185175507969128	0.343968125358206	0.328583727561253	567	tags=30%, list=18%, signal=25%	CDC42/FCN2/PRTN3/AZU1/ALOX15/CD177/AHSG/TGM2/CLU/CNN2/APOA1/CD300LF/APOC3/PPT1/FMR1/ACTG1/ATXN2/CD47/CD151/SNX17/SIRPA/PICALM/RAB27A/HNRNPK/LMAN2/ARRB1/HMGB1
GO:0051683	BP	GO:0051683	establishment of Golgi localization	5	0.826787795923454	1.66712412197309	0.0187069402779206	0.345645905069239	0.330186466509531	381	tags=40%, list=12%, signal=35%	CDC42/YWHAZ
GO:0000381	BP	GO:0000381	regulation of alternative mRNA splicing, via spliceosome	22	-0.588699966077858	-1.63841634787569	0.0187282937474512	0.345645905069239	0.330186466509531	453	tags=36%, list=15%, signal=31%	DDX17/SMU1/SRSF2/SRSF6/RBM8A/RBMX/TRA2B/CELF2
GO:0000768	BP	GO:0000768	syncytium formation by plasma membrane fusion	12	0.620657175979101	1.63659311597598	0.0193326852636561	0.353511959106854	0.33770070159799	863	tags=58%, list=28%, signal=42%	CD9/MAPK14/MYH9/CAPN2/EHD2/ITGB1/PTGFRN
GO:0006949	BP	GO:0006949	syncytium formation	12	0.620657175979101	1.63659311597598	0.0193326852636561	0.353511959106854	0.33770070159799	863	tags=58%, list=28%, signal=42%	CD9/MAPK14/MYH9/CAPN2/EHD2/ITGB1/PTGFRN
GO:0007520	BP	GO:0007520	myoblast fusion	12	0.620657175979101	1.63659311597598	0.0193326852636561	0.353511959106854	0.33770070159799	863	tags=58%, list=28%, signal=42%	CD9/MAPK14/MYH9/CAPN2/EHD2/ITGB1/PTGFRN
GO:0140253	BP	GO:0140253	cell-cell fusion	12	0.620657175979101	1.63659311597598	0.0193326852636561	0.353511959106854	0.33770070159799	863	tags=58%, list=28%, signal=42%	CD9/MAPK14/MYH9/CAPN2/EHD2/ITGB1/PTGFRN
GO:0003007	BP	GO:0003007	heart morphogenesis	26	0.486546429370855	1.60304019871838	0.0195945462731839	0.357476595917212	0.341488015146933	207	tags=21%, list=7%, signal=19%	FLNA/TPM1/CDC42/COL2A1/PARVA/FKBP1A
GO:0009299	BP	GO:0009299	mRNA transcription	8	0.730633596543384	1.67616011283598	0.0197214889804354	0.35814585022594	0.342127336232918	51	tags=22%, list=2%, signal=22%	FLNA/CREB1
GO:0051224	BP	GO:0051224	negative regulation of protein transport	25	-0.558097057933676	-1.6001973630435	0.0196909517395392	0.35814585022594	0.342127336232918	665	tags=40%, list=22%, signal=32%	UBAC2/PTPN11/APOE/CDK5/SNX12/CHP1/CHGA/RSC1A1/CD200/ERP29
GO:0031327	BP	GO:0031327	negative regulation of cellular biosynthetic process	404	-0.322042356110419	-1.31746114079744	0.0197865716055842	0.358507379593417	0.342472695754428	771	tags=27%, list=25%, signal=23%	RPS14/MEPCE/DCPS/FXR2/KDM1A/OGT/RALY/CHD4/ELAVL1/CDC73/RAN/TPR/SYNCRIP/INPP5D/DDRGK1/DDX21/NDUFA13/MRPL13/ANXA4/SERPINF2/MOV10/FXR1/FOXK1/PTPN11/CTSZ/MAFG/CHD3/ERLIN2/DHRS7B/APOE/SRSF7/FBP1/PRMT3/CHMP1A/ADNP/SRSF3/HNRNPAB/GATAD2B/MTPAP/CDK1/SMCHD1/CNOT2/CTBP1/GTPBP1/CSDE1/HNRNPD/CDK5/SNX12/CTNNB1/DHX34/SRSF10/RAD21/TAF15/DDX17/SHMT1/GIT1/PPM1B/NCOA5/PSMC5/STRN3/HNF4A/CD22/EPRS1/SCAF8/CSNK2A1/HNRN…
GO:0005216	MF	GO:0005216	monoatomic ion channel activity	29	0.466106287275002	1.57157895787766	0.0199179053619428	0.360064913331158	0.343960566878581	501	tags=33%, list=16%, signal=28%	CLCA1/TMEM109/CLIC4/CLIC1/ATP5F1D/ATP5MG/ANXA6/MCU/ATP5ME/CLIC2
GO:0008017	MF	GO:0008017	microtubule binding	60	0.386156368382162	1.53738322661497	0.0200884840184224	0.362323202659546	0.346117851437029	430	tags=24%, list=14%, signal=21%	S100A9/MX1/CLIP1/GOLGA2/DRG1/MX1/CLIP2/TBCB/MAP1B/RMDN1/FMR1/SBDS/MAP4/FES/CRYAB
GO:0034644	BP	GO:0034644	cellular response to UV	22	-0.583682879967077	-1.62445324888425	0.0202615875297757	0.364616686250113	0.348308756150959	502	tags=41%, list=16%, signal=34%	SDE2/MME/XPC/RPL26/BAK1/POLD1/USP47/MFAP4/ERCC4
GO:0034250	BP	GO:0034250	positive regulation of amide metabolic process	55	-0.477102767916412	-1.59015723523019	0.0205381989771194	0.368758251317692	0.352265084623039	758	tags=36%, list=25%, signal=28%	FXR2/OGT/ELAVL1/SYNCRIP/RPS4X/FXR1/CSDE1/HNRNPD/MRPS27/NIBAN1/RPL26/CASP3/MTOR/ERBB2/NCK1/PLXNB2/RBM3/RPS27L/EIF4G1/PRKDC
GO:0070486	BP	GO:0070486	leukocyte aggregation	5	0.823166419630027	1.65982202607463	0.0206696250162574	0.370280235054218	0.35371899576354	10	tags=20%, list=0%, signal=20%	S100A9
GO:0070301	BP	GO:0070301	cellular response to hydrogen peroxide	18	0.57722372583399	1.7062617772225	0.0209129850969313	0.373796057948754	0.357077569151491	1	tags=6%, list=0%, signal=6%	RHOB
GO:0015662	MF	GO:0015662	P-type ion transporter activity	7	0.760748572511443	1.6778360300416	0.0212857926996689	0.377906154059446	0.361003836154516	437	tags=71%, list=14%, signal=61%	ATP1B1/ATP13A1/ATP2B4/ATP2A2/ATP1A2
GO:0140358	MF	GO:0140358	P-type transmembrane transporter activity	7	0.760748572511443	1.6778360300416	0.0212857926996689	0.377906154059446	0.361003836154516	437	tags=71%, list=14%, signal=61%	ATP1B1/ATP13A1/ATP2B4/ATP2A2/ATP1A2
GO:0030199	BP	GO:0030199	collagen fibril organization	30	0.469666192194384	1.58990445931101	0.0212188008991347	0.377906154059446	0.361003836154516	394	tags=26%, list=13%, signal=23%	LOXL2/COL2A1/FMOD/COL14A1/COL3A1/COL1A1/SERPINH1/COL6A1
GO:0004386	MF	GO:0004386	helicase activity	59	-0.453002308320485	-1.52132682531801	0.0213940731383475	0.378980724165013	0.362030344789424	808	tags=44%, list=26%, signal=33%	RIGI/MCM7/DHX37/DHX30/CHD4/DDX21/DDX46/MOV10/DDX42/CHD3/WRNIP1/RECQL/SNRNP200/DHX34/DDX17/DHX40/DDX27/DDX47/MCM3/MCM4/DDX23/RAD50/RFC4/MTREX/DDX39B/DDX10
GO:0005507	MF	GO:0005507	copper ion binding	16	0.579231669380877	1.66369104241391	0.0214457377944751	0.379049833267159	0.36209636290191	220	tags=31%, list=7%, signal=29%	S100A12/LOXL2/ALB/SOD3/ATOX1
GO:0032793	BP	GO:0032793	positive regulation of CREB transcription factor activity	3	-0.902994791666667	-1.48850522830543	0.0215363186360488	0.379804943768185	0.362817700156312	302	tags=100%, list=10%, signal=90%	CD200/RPS6KA5
GO:0031638	BP	GO:0031638	zymogen activation	19	-0.590964134515148	-1.58801300840554	0.0217349541231353	0.381611937878766	0.364543874231068	651	tags=47%, list=21%, signal=38%	SERPINF2/CTSZ/C1R/FADD/BAK1/FGG/CLEC3B/FGB/FGA
GO:0000959	BP	GO:0000959	mitochondrial RNA metabolic process	19	-0.587973783166134	-1.5799774668818	0.0217349541231353	0.381611937878766	0.364543874231068	225	tags=26%, list=7%, signal=25%	ELAC2/SLIRP/TRNT1/DARS2/MRPL12
GO:1901990	BP	GO:1901990	regulation of mitotic cell cycle phase transition	63	-0.445627657985253	-1.51358971858825	0.0220067782520659	0.385531550128907	0.368288176998672	766	tags=42%, list=25%, signal=32%	MEPCE/ZW10/CDC73/TPR/RRM2B/BUB3/CDK1/SDE2/BABAM1/RDX/RAD21/XPC/BRCC3/ARID1A/RAD50/RPL26/TRIP13/SMARCD1/RRM1/USP47/CRLF3/PPP1R9B/RRM2/CDK4/RPS27L/EIF4G1/PRKDC
GO:0042770	BP	GO:0042770	signal transduction in response to DNA damage	32	-0.542153557996532	-1.64849463024472	0.022071390092714	0.385811788052375	0.368555880936068	637	tags=48%, list=21%, signal=39%	PTPN11/NDRG1/CDK1/SDE2/BABAM1/CDC5L/XPC/BRCC3/WDR76/FBXO6/RPL26/MSH2/MIF/MYO6/RPS27L/PRKDC
GO:0048678	BP	GO:0048678	response to axon injury	21	0.514016288980412	1.60575863057587	0.0222356763415853	0.386499062359673	0.369212416054006	361	tags=36%, list=12%, signal=32%	FLNA/SPP1/MAP1B/SARM1/MAP2K2/DPYSL3/FLNA/GRN
GO:1901028	BP	GO:1901028	regulation of mitochondrial outer membrane permeabilization involved in apoptotic signaling pathway	6	-0.770788527213891	-1.51271272415169	0.0221864806586662	0.386499062359673	0.369212416054006	275	tags=67%, list=9%, signal=61%	ACAA2/BAK1/ATP5IF1/HIP1R
GO:0062023	CC	GO:0062023	collagen-containing extracellular matrix	168	0.276952260291743	1.27517176998541	0.0222568134448551	0.386499062359673	0.369212416054006	398	tags=24%, list=13%, signal=22%	S100A9/S100A6/LOXL2/COL6A3/FCN2/PRTN3/ELANE/POSTN/MMP9/COL2A1/ANXA1/FMOD/AHSG/TGM2/CLU/APOA1/SPON1/LAMC1/LGALS1/FGL2/SOD3/ACTA2/COL14A1/SERPINB1/HDGF/COL6A3/APOC3/COL3A1/S100A4/LAMA4/COL1A1/SPARCL1/CSTB/LGALS9/FN1/CD151/SERPINH1/COL6A5/COL15A1/HNRNPM/COL6A1/ANXA6
GO:0048745	BP	GO:0048745	smooth muscle tissue development	4	0.865051334448959	1.62202927879434	0.0225931185526348	0.391482508370545	0.373972971307919	266	tags=50%, list=9%, signal=46%	MYLK/COL3A1
GO:0097708	CC	GO:0097708	intracellular vesicle	679	0.208950345388513	1.10366669296042	0.0226807017763053	0.39214389825002	0.37460477971093	456	tags=18%, list=15%, signal=20%	RHOB/ARG1/S100A12/S100A9/CLCA1/S100A11/CDC42/VMA21/OLFM4/FNDC3A/PRTN3/AZU1/ELANE/LTF/CLIP1/CD177/GOLGA2/MMP9/ALDOC/ANXA1/ZYX/MPO/COTL1/CHI3L1/CAPG/LCN2/AHSG/CLIC4/CLU/CNN2/SLC2A4/AP2A2/APOA1/LTA4H/ALB/WFS1/ARHGDIB/MYH11/COPS5/BSG/CYB5R3/SERPINB10/RAB12/NME2/VCL/BLOC1S3/PDCD6/OSTF1/FGL2/SNX4/SLC2A3/ITGA5/TXNDC5/ACTN1/RGS19/STOM/PIGR/GIGYF2/TUBB/CHMP4B/WASHC5/CD9/GGA2/SERPINB1/VPS33A/ALDOA/VAT1/TRI…
GO:0070570	BP	GO:0070570	regulation of neuron projection regeneration	7	0.756505077971993	1.6684769746469	0.0229075200896337	0.395204520502897	0.377528511866228	361	tags=62%, list=12%, signal=55%	FLNA/SPP1/MAP2K2/FLNA/GRN
GO:0030195	BP	GO:0030195	negative regulation of blood coagulation	19	-0.584512614490857	-1.57067676560467	0.0232839053940467	0.399095190512213	0.381245166870352	651	tags=42%, list=21%, signal=33%	SERPINF2/APOE/PLG/SERPING1/KNG1/FGG/FGB/FGA
GO:1900047	BP	GO:1900047	negative regulation of hemostasis	19	-0.584512614490857	-1.57067676560467	0.0232839053940467	0.399095190512213	0.381245166870352	651	tags=42%, list=21%, signal=33%	SERPINF2/APOE/PLG/SERPING1/KNG1/FGG/FGB/FGA
GO:0030121	CC	GO:0030121	AP-1 adaptor complex	4	-0.862938224681852	-1.52918951202657	0.0232530851356474	0.399095190512213	0.381245166870352	31	tags=50%, list=1%, signal=50%	AP1B1/AP1G1
GO:0060021	BP	GO:0060021	roof of mouth development	4	0.862236534542941	1.61675134015684	0.0233525335252324	0.399408849259147	0.381544796843747	85	tags=25%, list=3%, signal=24%	COL2A1
GO:0005682	CC	GO:0005682	U5 snRNP	12	-0.654545131177299	-1.57875582546654	0.0234197983519417	0.399697891873139	0.381820911671045	640	tags=50%, list=21%, signal=40%	SNRPF/SNRNP200/SNRPD3/DDX23/SNRPG/SNRPN
GO:0044773	BP	GO:0044773	mitotic DNA damage checkpoint signaling	12	-0.653899249212375	-1.57719796510502	0.0236528292582355	0.401087292720849	0.383148169855628	556	tags=69%, list=18%, signal=57%	CDK1/SDE2/BABAM1/XPC/BRCC3/RPL26/MSH2/RPS27L/PRKDC
GO:0044774	BP	GO:0044774	mitotic DNA integrity checkpoint signaling	12	-0.653899249212375	-1.57719796510502	0.0236528292582355	0.401087292720849	0.383148169855628	556	tags=69%, list=18%, signal=57%	CDK1/SDE2/BABAM1/XPC/BRCC3/RPL26/MSH2/RPS27L/PRKDC
GO:0031330	BP	GO:0031330	negative regulation of cellular catabolic process	63	-0.444835265783984	-1.51089833113184	0.0235647409293216	0.401087292720849	0.383148169855628	711	tags=41%, list=23%, signal=32%	ELAVL1/SYNCRIP/FOXK1/WNK1/FBP1/HNRNPAB/SORL1/CSDE1/HNRNPD/DHX34/CTSA/TAF15/GIT1/SLC4A1/RASIP1/PLIN5/RBM10/MTOR/STK38L/RRAGB/IGF2BP2/SLIRP/HP/SNRNP70/EIF4G1/MYD88
GO:0070314	BP	GO:0070314	G1 to G0 transition	3	-0.896969107305052	-1.47857243272437	0.0238301022402538	0.403231751340415	0.38519671492382	315	tags=67%, list=10%, signal=60%	RPL23/PHGDH
GO:0051282	BP	GO:0051282	regulation of sequestering of calcium ion	26	0.477542551706735	1.57337483284859	0.0240026584374375	0.403570121524373	0.385519951084802	768	tags=50%, list=25%, signal=38%	FLNA/FKBP1A/FLNA/ANXA6/DMD/ATP1A2/CLIC2/CALM3/DIAPH1/PTPRC/ERO1A/SRI/F2/ITPR1
GO:0051283	BP	GO:0051283	negative regulation of sequestering of calcium ion	26	0.477542551706735	1.57337483284859	0.0240026584374375	0.403570121524373	0.385519951084802	768	tags=50%, list=25%, signal=38%	FLNA/FKBP1A/FLNA/ANXA6/DMD/ATP1A2/CLIC2/CALM3/DIAPH1/PTPRC/ERO1A/SRI/F2/ITPR1
GO:0050792	BP	GO:0050792	regulation of viral process	45	0.415314570214239	1.54817712407741	0.0239454229902769	0.403570121524373	0.385519951084802	375	tags=28%, list=12%, signal=25%	MX1/LTF/FAM111A/LGALS1/MX1/ISG15/ZC3HAV1/STOM/TRIM21/TOP2A/FMR1/LGALS9/P4HB
GO:0098641	MF	GO:0098641	cadherin binding involved in cell-cell adhesion	10	0.664281151844988	1.63185828164212	0.0243113445763159	0.405774091581971	0.387625345868707	534	tags=50%, list=17%, signal=41%	S100A11/ANXA1/TMOD3/RAB10/PPP1CA
GO:0090042	BP	GO:0090042	tubulin deacetylation	4	0.858184302736896	1.6091531337012	0.0244916569893856	0.405774091581971	0.387625345868707	327	tags=40%, list=11%, signal=36%	FLNA/FLNA
GO:0003299	BP	GO:0003299	muscle hypertrophy in response to stress	4	0.856401018065169	1.60580935532092	0.0244916569893856	0.405774091581971	0.387625345868707	425	tags=75%, list=14%, signal=65%	LMNA/ATP2B4/ATP2A2
GO:0014887	BP	GO:0014887	cardiac muscle adaptation	4	0.856401018065169	1.60580935532092	0.0244916569893856	0.405774091581971	0.387625345868707	425	tags=75%, list=14%, signal=65%	LMNA/ATP2B4/ATP2A2
GO:0014898	BP	GO:0014898	cardiac muscle hypertrophy in response to stress	4	0.856401018065169	1.60580935532092	0.0244916569893856	0.405774091581971	0.387625345868707	425	tags=75%, list=14%, signal=65%	LMNA/ATP2B4/ATP2A2
GO:0010640	BP	GO:0010640	regulation of platelet-derived growth factor receptor signaling pathway	7	-0.757245735557826	-1.57735705842359	0.0244641422255103	0.405774091581971	0.387625345868707	140	tags=29%, list=5%, signal=27%	HIP1R/HGS
GO:0005775	CC	GO:0005775	vacuolar lumen	85	0.335144180239845	1.39968073856577	0.0244750448289521	0.405774091581971	0.387625345868707	433	tags=22%, list=14%, signal=20%	ARG1/PRTN3/AZU1/ELANE/GC/MPO/FMOD/CYB5R3/TXNDC5/TUBB/VAT1/PRDX6/PPT1/ACTR2/GRN/IST1/GLB1/GNS/BGN
GO:0016529	CC	GO:0016529	sarcoplasmic reticulum	21	0.511211154072466	1.59699554332566	0.0246161449150717	0.406584930594315	0.388399919108162	768	tags=50%, list=25%, signal=38%	TMEM109/SLC2A4/FKBP1A/MANF/COL6A1/ATP2A2/REEP5/AGL/SRI/DMPK/ITPR1
GO:0070070	BP	GO:0070070	proton-transporting V-type ATPase complex assembly	3	0.885323374670621	1.53685336700356	0.0246942964398261	0.406584930594315	0.388399919108162	236	tags=67%, list=8%, signal=62%	VMA21/ALDOB
GO:0070072	BP	GO:0070072	vacuolar proton-transporting V-type ATPase complex assembly	3	0.885323374670621	1.53685336700356	0.0246942964398261	0.406584930594315	0.388399919108162	236	tags=67%, list=8%, signal=62%	VMA21/ALDOB
GO:0046598	BP	GO:0046598	positive regulation of viral entry into host cell	6	0.77307814538686	1.64641873848431	0.0250641892306959	0.409093913766708	0.390796684919863	567	tags=83%, list=18%, signal=68%	LGALS1/TRIM21/LGALS9/P4HB/HMGB1
GO:0075294	BP	GO:0075294	positive regulation by symbiont of entry into host	6	0.77307814538686	1.64641873848431	0.0250641892306959	0.409093913766708	0.390796684919863	567	tags=83%, list=18%, signal=68%	LGALS1/TRIM21/LGALS9/P4HB/HMGB1
GO:1902042	BP	GO:1902042	negative regulation of extrinsic apoptotic signaling pathway via death domain receptors	8	-0.733072388332027	-1.58994159544106	0.0248998231185547	0.409093913766708	0.390796684919863	124	tags=38%, list=4%, signal=36%	FGG/FGB/FGA
GO:0051540	MF	GO:0051540	metal cluster binding	25	-0.547935931931747	-1.57106299151673	0.0249841658979336	0.409093913766708	0.390796684919863	426	tags=35%, list=14%, signal=30%	FDX2/CIAPIN1/CISD2/PPAT/POLD1/ETFDH/DPH1/NDUFS8/ACO2
GO:0006930	BP	GO:0006930	substrate-dependent cell migration, cell extension	3	-0.895182291666667	-1.47562702878151	0.0251044274199076	0.409093913766708	0.390796684919863	326	tags=100%, list=11%, signal=89%	CD2AP/NCK1
GO:0044548	MF	GO:0044548	S100 protein binding	8	0.718982863446656	1.64943194950703	0.0258155106595355	0.418105903253211	0.399405602083726	21	tags=25%, list=1%, signal=25%	S100A11/S100A6
GO:0006476	BP	GO:0006476	protein deacetylation	8	0.717581089234143	1.64621611323378	0.0258155106595355	0.418105903253211	0.399405602083726	327	tags=33%, list=11%, signal=30%	FLNA/HDAC7/FLNA
GO:0033077	BP	GO:0033077	T cell differentiation in thymus	9	-0.700931832228436	-1.57870967151348	0.0257937346893281	0.418105903253211	0.399405602083726	480	tags=44%, list=16%, signal=38%	CTNNB1/FADD/ERBB2/PRKDC
GO:0030282	BP	GO:0030282	bone mineralization	14	0.594709169546505	1.64730950059405	0.0258937397854253	0.418518775839379	0.399800008435272	394	tags=50%, list=13%, signal=44%	LTF/ALOX15/AHSG/ISG15/TMEM119/SBDS/COL6A1
GO:1902036	BP	GO:1902036	regulation of hematopoietic stem cell differentiation	4	-0.855772449203485	-1.51649123491514	0.0259646181861244	0.418811402286755	0.400079546804596	10	tags=50%, list=0%, signal=50%	EIF2AK2/PRKDC
GO:0032153	CC	GO:0032153	cell division site	24	0.508570080477144	1.65027484440774	0.0261109133578317	0.420212318326065	0.40141780514966	62	tags=8%, list=2%, signal=8%	RHOB/MYLK
GO:0002446	BP	GO:0002446	neutrophil mediated immunity	14	0.593115928000213	1.64289631500629	0.0263363571294027	0.420212318326065	0.40141780514966	78	tags=29%, list=3%, signal=28%	ARG1/AZU1/ELANE/CD177
GO:0030593	BP	GO:0030593	neutrophil chemotaxis	21	0.50901080335914	1.59012176865361	0.0265280205999696	0.420212318326065	0.40141780514966	139	tags=14%, list=5%, signal=14%	S100A12/S100A9/BSG
GO:0030532	CC	GO:0030532	small nuclear ribonucleoprotein complex	37	-0.503376354791167	-1.57403945395567	0.0263804095464437	0.420212318326065	0.40141780514966	927	tags=42%, list=30%, signal=30%	LSM8/HTATSF1/LSM3/SART1/MEPCE/DDX46/SNRPF/SNRNP200/EFTUD2/SNRPD3/DDX23/PRPF4/SNRPG/SNRNP70/DDX39B/SNRPN
GO:0001837	BP	GO:0001837	epithelial to mesenchymal transition	28	0.467119096807394	1.56684142921839	0.0262270714862317	0.420212318326065	0.40141780514966	327	tags=27%, list=11%, signal=24%	FLNA/LOXL2/GLIPR2/PDCD6/MCRIP1/S100A4/COL1A1/FLNA
GO:1902041	BP	GO:1902041	regulation of extrinsic apoptotic signaling pathway via death domain receptors	12	-0.647849576164138	-1.56260621869649	0.0264629794557552	0.420212318326065	0.40141780514966	124	tags=25%, list=4%, signal=24%	FGG/FGB/FGA
GO:0060351	BP	GO:0060351	cartilage development involved in endochondral bone morphogenesis	3	0.881510416666667	1.53023436482393	0.0264967689085471	0.420212318326065	0.40141780514966	367	tags=100%, list=12%, signal=88%	COL2A1/COL1A1/SERPINH1
GO:0031331	BP	GO:0031331	positive regulation of cellular catabolic process	76	-0.439170584251479	-1.53018820260299	0.0262539790661048	0.420212318326065	0.40141780514966	762	tags=28%, list=25%, signal=21%	DCPS/FXR2/ELAVL1/TOM1/SYNCRIP/MOV10/FXR1/APOE/PIP4K2A/CNOT2/GTPBP1/CSDE1/HNRNPD/SPTLC1/CSNK2A1/PLIN5/CNOT1/MTOR/SLC4A4/AKT2/ALKBH5
GO:0051240	BP	GO:0051240	positive regulation of multicellular organismal process	298	0.250902534694284	1.24064718419742	0.0263442373942214	0.420212318326065	0.40141780514966	336	tags=16%, list=11%, signal=15%	RHOB/FLNA/TPM1/LOXL2/AZU1/ELANE/LTF/CREB1/POSTN/ANXA1/TWF1/CHI3L1/LCN2/HSPB1/CFL1/TGM2/CLU/DDT/RRAS/LGALS1/GFAP/ISG15/GLIPR2/NME2/BLOC1S3/PDCD6/SNX4/ACTA2/ZC3HAV1/ITGA5/SPP1/HSPB6/MAP1B/TWF2/GPLD1/MAP2K2/FMR1/SPINK1/ERAP1/COL1A1/STAT6/PHB1/TMEM119/CD47/FLNA/LGALS9/FN1
GO:0003730	MF	GO:0003730	mRNA 3'-UTR binding	40	-0.519039720962209	-1.63736908123206	0.0265933727010986	0.420408377999837	0.401605095813194	758	tags=42%, list=25%, signal=32%	FXR2/RNF40/ELAVL1/AUH/GEMIN5/FXR1/HNRNPD/TAF15/DDX17/HNRNPA2B1/CRYZ/RNF20/IGF2BP2/CARHSP1/HNRNPA3/NUDT21/CELF2
GO:0004128	MF	GO:0004128	cytochrome-b5 reductase activity, acting on NAD(P)H	3	0.8799465806293	1.52751966559851	0.0268572636425232	0.422057909439731	0.40318084992903	140	tags=67%, list=5%, signal=64%	CYB5R4/CYB5R3
GO:0015919	BP	GO:0015919	peroxisomal membrane transport	5	-0.805018795273743	-1.50728420003116	0.0268304603601211	0.422057909439731	0.40318084992903	193	tags=40%, list=6%, signal=38%	ABCD3/PEX16
GO:0043574	BP	GO:0043574	peroxisomal transport	5	-0.805018795273743	-1.50728420003116	0.0268304603601211	0.422057909439731	0.40318084992903	193	tags=40%, list=6%, signal=38%	ABCD3/PEX16
GO:0002719	BP	GO:0002719	negative regulation of cytokine production involved in immune response	6	0.770192062331952	1.64027226900929	0.0270071121199649	0.423573995620636	0.404629127289344	114	tags=33%, list=4%, signal=32%	ARG1/APOA1
GO:0000245	BP	GO:0000245	spliceosomal complex assembly	36	-0.53531188906598	-1.66577558802999	0.02712221818095	0.424540283005955	0.405552196281951	719	tags=41%, list=23%, signal=31%	SRSF1/DDX46/SNRPF/DDX42/CRNKL1/SNRNP200/SRSF10/SNRPD3/SRSF5/U2AF2/DDX23/SRSF6/SNRPG/DDX39B/CELF2
GO:0008630	BP	GO:0008630	intrinsic apoptotic signaling pathway in response to DNA damage	25	-0.54378130689774	-1.55915069072721	0.0276372857270648	0.431022963065331	0.411744930496142	303	tags=28%, list=10%, signal=25%	RPL26/MSH2/BAK1/USP47/MIF/RPS27L/PRKDC
GO:0051208	BP	GO:0051208	sequestering of calcium ion	27	0.470420037343787	1.5564700918819	0.0276449959929755	0.431022963065331	0.411744930496142	768	tags=48%, list=25%, signal=37%	FLNA/FKBP1A/FLNA/ANXA6/DMD/ATP1A2/CLIC2/CALM3/DIAPH1/PTPRC/ERO1A/SRI/F2/ITPR1
GO:0002251	BP	GO:0002251	organ or tissue specific immune response	5	0.805353833063787	1.62390495897987	0.0289372607817027	0.43495509353809	0.415501191593448	199	tags=40%, list=6%, signal=37%	LTF/PIGR
GO:0002385	BP	GO:0002385	mucosal immune response	5	0.805353833063787	1.62390495897987	0.0289372607817027	0.43495509353809	0.415501191593448	199	tags=40%, list=6%, signal=37%	LTF/PIGR
GO:0002710	BP	GO:0002710	negative regulation of T cell mediated immunity	4	0.85023084903515	1.5942398745014	0.0290481602287283	0.43495509353809	0.415501191593448	5	tags=25%, list=0%, signal=25%	ARG1
GO:0051536	MF	GO:0051536	iron-sulfur cluster binding	24	-0.559838641604339	-1.59200375788695	0.0283548669623363	0.43495509353809	0.415501191593448	426	tags=36%, list=14%, signal=31%	FDX2/CIAPIN1/CISD2/PPAT/POLD1/ETFDH/DPH1/NDUFS8/ACO2
GO:0009263	BP	GO:0009263	deoxyribonucleotide biosynthetic process	9	-0.696757876354336	-1.56930866530441	0.028582174794524	0.43495509353809	0.415501191593448	629	tags=56%, list=20%, signal=44%	RRM2B/SHMT1/RRM1/RRM2/DUT
GO:0009265	BP	GO:0009265	2'-deoxyribonucleotide biosynthetic process	9	-0.696757876354336	-1.56930866530441	0.028582174794524	0.43495509353809	0.415501191593448	629	tags=56%, list=20%, signal=44%	RRM2B/SHMT1/RRM1/RRM2/DUT
GO:0046385	BP	GO:0046385	deoxyribose phosphate biosynthetic process	9	-0.696757876354336	-1.56930866530441	0.028582174794524	0.43495509353809	0.415501191593448	629	tags=56%, list=20%, signal=44%	RRM2B/SHMT1/RRM1/RRM2/DUT
GO:0015935	CC	GO:0015935	small ribosomal subunit	38	-0.496695628405482	-1.55761007808546	0.028748996819382	0.43495509353809	0.415501191593448	946	tags=53%, list=31%, signal=37%	RPS28/EIF2A/RACK1/RPS13/RPS15A/RPS25/RPS14/RPS10/RPS4X/RPS17/RPS21/MRPS27/RPS23/MRPS34/RPS19/RPS26/MRPS18B/RPS5/RPS29/RPS27L
GO:0005685	CC	GO:0005685	U1 snRNP	12	-0.644318074442252	-1.55408827447767	0.028804777401958	0.43495509353809	0.415501191593448	640	tags=42%, list=21%, signal=33%	SNRPF/SNRPD3/SNRPG/SNRNP70/SNRPN
GO:0004033	MF	GO:0004033	aldo-keto reductase (NADP) activity	7	-0.744447411862551	-1.55069791031778	0.0287393048932642	0.43495509353809	0.415501191593448	721	tags=71%, list=23%, signal=55%	AKR1B1/DHRS4/RDH11/AKR1E2/AKR7A2
GO:0050818	BP	GO:0050818	regulation of coagulation	26	-0.531638640771561	-1.54423692964196	0.0284797782705404	0.43495509353809	0.415501191593448	759	tags=42%, list=25%, signal=32%	PRDX2/ANXA5/SERPINF2/APOE/PLG/SERPING1/CAV1/KNG1/FGG/FGB/FGA
GO:1901988	BP	GO:1901988	negative regulation of cell cycle phase transition	41	-0.486384186286315	-1.53521031661672	0.0285468238459686	0.43495509353809	0.415501191593448	743	tags=52%, list=24%, signal=40%	ZW10/CDC73/TPR/PTPN11/BUB3/CDK1/SDE2/BABAM1/CDC5L/RAD21/XPC/BRCC3/WDR76/FBXO6/RAD50/RPL26/MSH2/TRIP13/USP47/CRLF3/RPS27L/PRKDC
GO:0048194	BP	GO:0048194	Golgi vesicle budding	6	-0.760182684589808	-1.49189820431731	0.0280225598316478	0.43495509353809	0.415501191593448	186	tags=50%, list=6%, signal=47%	GBF1/MYO18A/TMED2
GO:0035282	BP	GO:0035282	segmentation	6	-0.758341605628034	-1.48828499074016	0.0289972334132454	0.43495509353809	0.415501191593448	37	tags=50%, list=1%, signal=49%	POGLUT1/TMED2/PRKDC
GO:0021846	BP	GO:0021846	cell proliferation in forebrain	3	-0.892176326093234	-1.47067196645618	0.0289424749754597	0.43495509353809	0.415501191593448	248	tags=67%, list=8%, signal=61%	RRM1/DOCK7
GO:0090257	BP	GO:0090257	regulation of muscle system process	51	0.378830553992479	1.45767414045192	0.0285527250125802	0.43495509353809	0.415501191593448	532	tags=29%, list=17%, signal=24%	TPM1/MYL9/CNN1/LMNA/TWF1/ATP1B1/ATP2B4/DMD/PPP1R12B/ATP2A2/ATP1A2/PRKG1/CLIC2/CALM3/ENO1
GO:0019001	MF	GO:0019001	guanyl nucleotide binding	112	0.303791264506772	1.33924018800116	0.028093798036023	0.43495509353809	0.415501191593448	596	tags=30%, list=19%, signal=25%	RHOB/CDC42/MX1/IRGQ/TGM2/DRG1/RRAS/MX1/RAB12/NME2/TUBB/RAP1B/AK4/TUBB6/SAMHD1/RTCB/SAR1B/GMPPB/ATL3/RAB18/ANXA6/SEPTIN2/SEPTIN9/PRKG1/RABL6/EIF2S3/ARL8B/RAB10/RAB27A/TUBA1B/RAB6A/SAR1A/TUFM/ARF4
GO:0032561	MF	GO:0032561	guanyl ribonucleotide binding	112	0.303791264506772	1.33924018800116	0.028093798036023	0.43495509353809	0.415501191593448	596	tags=30%, list=19%, signal=25%	RHOB/CDC42/MX1/IRGQ/TGM2/DRG1/RRAS/MX1/RAB12/NME2/TUBB/RAP1B/AK4/TUBB6/SAMHD1/RTCB/SAR1B/GMPPB/ATL3/RAB18/ANXA6/SEPTIN2/SEPTIN9/PRKG1/RABL6/EIF2S3/ARL8B/RAB10/RAB27A/TUBA1B/RAB6A/SAR1A/TUFM/ARF4
GO:0005509	MF	GO:0005509	calcium ion binding	147	0.288234393990602	1.31819540733321	0.0282948253716387	0.43495509353809	0.415501191593448	229	tags=11%, list=7%, signal=11%	S100A12/S100A9/PCP4/S100A2/S100A11/S100A6/MYL9/LOXL2/MYL6/ANXA1/TGM2/PDCD6/ITGA5/ACTN1/DGKA/CAPNS1/TGM3
GO:0050839	MF	GO:0050839	cell adhesion molecule binding	274	0.250785116970126	1.21465976873771	0.028548154361917	0.43495509353809	0.415501191593448	534	tags=26%, list=17%, signal=23%	FLNA/S100A11/OLFM4/TES/POSTN/CD177/GOLGA2/ANXA1/TWF1/PARVA/CAPG/CNN2/BAG3/BSG/GFAP/PPME1/ISG15/VCL/RPL29/CLIC1/ZC3HAV1/ITGA5/ACTN1/SPP1/GIGYF2/CHMP4B/CALD1/CD9/SERBP1/TWF2/ALDOA/NEXN/PRDX6/COL3A1/TAGLN2/IDH1/PALLD/ITGA7/CD47/FLNA/FN1/CC2D1A/CD151/IST1/EFHD2/P4HB/YWHAZ/ESYT2/TMOD3/TLN1/ARHGAP1/EVPL/SEPTIN2/SIRPA/SEPTIN9/PKM/TGFBI/PICALM/EIF2S3/EMD/ACTN2/FBLN1/RAB10/ADD1/NOP56/HNRNPK/NIBAN2/IQGAP1/…
GO:0009653	BP	GO:0009653	anatomical structure morphogenesis	459	0.227395658236758	1.16827315618876	0.0288792296616654	0.43495509353809	0.415501191593448	396	tags=18%, list=13%, signal=18%	RHOB/FLNA/TPM1/S100A6/MYL9/CDC42/LOXL2/INF2/LTF/CREB1/FLNC/MYLK/LIMD1/POSTN/CSRP1/PGM5/MMP9/ACTA1/COL2A1/ANXA1/CHI3L1/CFL2/PARVA/CLIC4/HSPB1/CFL1/TGM2/CLU/APOA1/RRAS/MYH11/BSG/VCL/PDCD6/ACTA2/ITGA5/ABLIM1/ACTN1/SPP1/HDAC7/HSPB6/MAP1B/FKBP1A/CALD1/CD9/VPS33A/TWF2/GPLD1/YWHAH/ALDOA/TGM3/VAT1/SARM1/NEXN/HERC1/GPI/TCIRG1/MAP2K2/COL3A1/ACTG1/NFKB1/ERAP1/COL1A1/STAT6/PALLD/ITGA7/TMEM119/GPX1/CD47/FLNA/…
GO:0030278	BP	GO:0030278	regulation of ossification	13	0.600293055912677	1.63010627780822	0.0292894032850324	0.436428842651307	0.416909025463539	390	tags=38%, list=13%, signal=34%	LTF/AHSG/ISG15/TMEM119/MAPK14
GO:0043277	BP	GO:0043277	apoptotic cell clearance	13	0.599161510448751	1.62703354633781	0.0292894032850324	0.436428842651307	0.416909025463539	157	tags=38%, list=5%, signal=37%	FCN2/ALOX15/ANXA1/TGM2/CD300LF
GO:1903828	BP	GO:1903828	negative regulation of protein localization	53	-0.457386430251996	-1.52012629155229	0.0293115641548824	0.436428842651307	0.416909025463539	665	tags=30%, list=22%, signal=24%	UBAC2/PTPN11/APOE/WNK1/CDK5/SNX12/CHP1/CHGA/RSC1A1/MTOR/LMAN1/CD200/ASTN2/GRIPAP1/ERP29/TMED2
GO:0070555	BP	GO:0070555	response to interleukin-1	25	-0.538623486886599	-1.54436199069098	0.0294060354174601	0.437015537589819	0.417469479748763	280	tags=24%, list=9%, signal=22%	IGBP1/RBMX/FGG/FGB/MYD88/RPS6KA5
GO:0051209	BP	GO:0051209	release of sequestered calcium ion into cytosol	25	0.463283191116854	1.51448983140771	0.0299680523410495	0.441293246821098	0.421555863169241	768	tags=48%, list=25%, signal=36%	FLNA/FKBP1A/FLNA/DMD/ATP1A2/CLIC2/CALM3/DIAPH1/PTPRC/ERO1A/SRI/F2/ITPR1
GO:0000796	CC	GO:0000796	condensin complex	4	-0.84923477694562	-1.50490600254989	0.0299210197326254	0.441293246821098	0.421555863169241	468	tags=100%, list=15%, signal=85%	NCAPD2/SMC4/NCAPG
GO:1905821	BP	GO:1905821	positive regulation of chromosome condensation	4	-0.84923477694562	-1.50490600254989	0.0299210197326254	0.441293246821098	0.421555863169241	468	tags=100%, list=15%, signal=85%	NCAPD2/SMC4/NCAPG
GO:0008106	MF	GO:0008106	alcohol dehydrogenase (NADP+) activity	6	-0.757003875044925	-1.48565962463375	0.0299719077667051	0.441293246821098	0.421555863169241	721	tags=83%, list=23%, signal=64%	AKR1B1/DHRS4/RDH11/AKR1E2/AKR7A2
GO:0031410	CC	GO:0031410	cytoplasmic vesicle	677	0.208329280482642	1.09784717651689	0.0299311194769207	0.441293246821098	0.421555863169241	456	tags=18%, list=15%, signal=20%	RHOB/ARG1/S100A12/S100A9/CLCA1/S100A11/CDC42/VMA21/OLFM4/FNDC3A/PRTN3/AZU1/ELANE/LTF/CLIP1/CD177/GOLGA2/MMP9/ALDOC/ANXA1/ZYX/MPO/COTL1/CHI3L1/CAPG/LCN2/AHSG/CLIC4/CLU/CNN2/SLC2A4/AP2A2/APOA1/LTA4H/ALB/WFS1/ARHGDIB/MYH11/COPS5/BSG/CYB5R3/SERPINB10/RAB12/NME2/VCL/BLOC1S3/PDCD6/OSTF1/FGL2/SNX4/SLC2A3/ITGA5/TXNDC5/ACTN1/RGS19/STOM/PIGR/GIGYF2/TUBB/CHMP4B/WASHC5/CD9/GGA2/SERPINB1/VPS33A/ALDOA/VAT1/TRI…
GO:1904950	BP	GO:1904950	negative regulation of establishment of protein localization	28	-0.539491739377919	-1.59028212419156	0.0301139343538334	0.442563301911151	0.422769113482082	665	tags=39%, list=22%, signal=31%	UBAC2/PTPN11/APOE/CDK5/SNX12/CHP1/CHGA/RSC1A1/LMAN1/CD200/ERP29
GO:0050819	BP	GO:0050819	negative regulation of coagulation	20	-0.584504267194063	-1.58693907385447	0.0302904110390756	0.443514210343365	0.423677491364192	678	tags=45%, list=22%, signal=35%	ANXA5/SERPINF2/APOE/PLG/SERPING1/KNG1/FGG/FGB/FGA
GO:0097525	CC	GO:0097525	spliceosomal snRNP complex	35	-0.502365318810556	-1.54358262781771	0.0302871990385789	0.443514210343365	0.423677491364192	927	tags=42%, list=30%, signal=29%	LSM8/HTATSF1/LSM3/SART1/DDX46/SNRPF/SNRNP200/EFTUD2/SNRPD3/DDX23/PRPF4/SNRPG/SNRNP70/DDX39B/SNRPN
GO:0070059	BP	GO:0070059	intrinsic apoptotic signaling pathway in response to endoplasmic reticulum stress	17	-0.584199321768072	-1.53879501065579	0.0303797632840286	0.444003317536006	0.4241447226356	372	tags=35%, list=12%, signal=31%	DNAJC10/APAF1/BAK1/TXNDC12/NCK1/ERP29
GO:0006067	BP	GO:0006067	ethanol metabolic process	5	0.803302325467699	1.61976832583565	0.0305120540307556	0.445117023507494	0.425208616736652	179	tags=33%, list=6%, signal=31%	ALDH1B1/SULT1A3
GO:0045109	BP	GO:0045109	intermediate filament organization	8	0.705284531738446	1.61800635214834	0.0306939395554308	0.44694881525119	0.42695847933986	142	tags=25%, list=5%, signal=24%	DES/GFAP
GO:0014910	BP	GO:0014910	regulation of smooth muscle cell migration	15	0.584222385557817	1.6483019944415	0.030853822451592	0.447771492695401	0.427744361522745	64	tags=19%, list=2%, signal=18%	TPM1/S100A11/POSTN
GO:0016779	MF	GO:0016779	nucleotidyltransferase activity	34	-0.530836356212075	-1.62941454950254	0.0313404420080376	0.447771492695401	0.427744361522745	558	tags=31%, list=18%, signal=26%	MTPAP/CDS2/UAP1L1/UAP1/POLD1/POLR2E/RPAP1/TRNT1/POLR2K/SELENOO/PARP2
GO:0006527	BP	GO:0006527	arginine catabolic process	6	0.761541674479256	1.62184960276161	0.0312815503716916	0.447771492695401	0.427744361522745	5	tags=17%, list=0%, signal=17%	ARG1
GO:0097440	CC	GO:0097440	apical dendrite	5	0.800325334258608	1.6137655596119	0.0312994510899047	0.447771492695401	0.427744361522745	327	tags=67%, list=11%, signal=60%	FLNA/CLU/MAP1B/FLNA
GO:0010948	BP	GO:0010948	negative regulation of cell cycle process	47	-0.483315829084768	-1.58174824381797	0.0312540544470972	0.447771492695401	0.427744361522745	743	tags=50%, list=24%, signal=39%	ZW10/RBM14/CDC73/TPR/PTPN11/BUB3/CDK1/SDE2/BABAM1/CDC5L/RAD21/XPC/BRCC3/WDR76/FBXO6/TOM1L2/RAD50/RPL26/MSH2/TRIP13/USP47/CRLF3/RPS27L/PRKDC
GO:1904706	BP	GO:1904706	negative regulation of vascular associated smooth muscle cell proliferation	9	0.672120192160896	1.57589104713698	0.0313965194694286	0.447771492695401	0.427744361522745	502	tags=50%, list=16%, signal=42%	TPM1/CNN1/PRKG1/SOD2/PDCD4
GO:0014075	BP	GO:0014075	response to amine	11	-0.667853795964665	-1.5687144609243	0.0309676360038838	0.447771492695401	0.427744361522745	629	tags=45%, list=20%, signal=36%	RRM2B/CDK1/COMT/PPP1R9B/MYD88
GO:0016226	BP	GO:0016226	iron-sulfur cluster assembly	9	-0.695664148732525	-1.56684526116843	0.031370620949743	0.447771492695401	0.427744361522745	426	tags=33%, list=14%, signal=29%	FDX2/CIAPIN1/ABCB7
GO:0031163	BP	GO:0031163	metallo-sulfur cluster assembly	9	-0.695664148732525	-1.56684526116843	0.031370620949743	0.447771492695401	0.427744361522745	426	tags=33%, list=14%, signal=29%	FDX2/CIAPIN1/ABCB7
GO:0030038	BP	GO:0030038	contractile actin filament bundle assembly	34	0.431154871099857	1.52056220142557	0.0314839330801454	0.447771492695401	0.427744361522745	118	tags=16%, list=4%, signal=16%	TPM1/CDC42/SORBS1/ZYX/APOA1/SORBS1
GO:0043149	BP	GO:0043149	stress fiber assembly	34	0.431154871099857	1.52056220142557	0.0314839330801454	0.447771492695401	0.427744361522745	118	tags=16%, list=4%, signal=16%	TPM1/CDC42/SORBS1/ZYX/APOA1/SORBS1
GO:0008028	MF	GO:0008028	monocarboxylic acid transmembrane transporter activity	4	-0.847606843713355	-1.50202118605451	0.0309101221947436	0.447771492695401	0.427744361522745	352	tags=50%, list=11%, signal=44%	SLC51B/ABCC3
GO:0007507	BP	GO:0007507	heart development	95	0.326331745342722	1.39997476213393	0.0313304957816253	0.447771492695401	0.427744361522745	509	tags=30%, list=17%, signal=26%	FLNA/TPM1/CDC42/LMNA/PDLIM7/CREB1/COL2A1/PARVA/MYH11/SORBS2/COL14A1/FKBP1A/MAP2K2/COL3A1/PDLIM3/FLNA/FN1/PDLIM7/FES/MAPK14/COL6A1/SNX17/PRKG1/HSPB7/ACTN2/ACADM/SOD2/AP2B1/PDCD4/TGFB1
GO:0043030	BP	GO:0043030	regulation of macrophage activation	12	-0.642534752274636	-1.54978692056531	0.0316149404275447	0.448830352831833	0.428755862836224	239	tags=33%, list=8%, signal=31%	BPI/CD200/MYO18A/MIF
GO:0140993	MF	GO:0140993	histone modifying activity	28	-0.537261047776935	-1.5837066222539	0.0318984320734626	0.450646107129699	0.430490405288107	320	tags=21%, list=10%, signal=19%	MCM3AP/PRKCB/RNF20/HAT1/PRKDC/RPS6KA5
GO:0001937	BP	GO:0001937	negative regulation of endothelial cell proliferation	11	-0.663088435206377	-1.55752115727279	0.0319131945825215	0.450646107129699	0.430490405288107	608	tags=45%, list=20%, signal=37%	APOE/MMRN2/ATP5IF1/CAV1/CAV2
GO:0036466	BP	GO:0036466	synaptic vesicle recycling via endosome	4	-0.845990572739387	-1.49915703593195	0.0318992253326283	0.450646107129699	0.430490405288107	187	tags=50%, list=6%, signal=47%	GRIPAP1/AP1G1
GO:0043198	CC	GO:0043198	dendritic shaft	5	0.796608423025742	1.6062708283083	0.0320868484103634	0.452293479546437	0.432064096945756	327	tags=33%, list=11%, signal=30%	FLNA/FLNA
GO:0010810	BP	GO:0010810	regulation of cell-substrate adhesion	68	0.352003668103395	1.43286742393642	0.032157645940962	0.452487727282756	0.432249656712968	400	tags=23%, list=13%, signal=20%	FLNA/CDC42/OLFM4/POSTN/ALOX15/APOA1/RRAS/VCL/ITGA5/ACTG1/COL1A1/FLNA/FN1/P4HB/RSU1/TLN1
GO:0042789	BP	GO:0042789	mRNA transcription by RNA polymerase II	7	0.737145784778755	1.62577992491269	0.0322324970573544	0.452738224154274	0.432488949803571	51	tags=25%, list=2%, signal=25%	FLNA/CREB1
GO:0034114	BP	GO:0034114	regulation of heterotypic cell-cell adhesion	9	-0.693134775230468	-1.56114834996114	0.0323001040751459	0.452886264912294	0.432630369256465	124	tags=44%, list=4%, signal=43%	WNK1/FGG/FGB/FGA
GO:0021762	BP	GO:0021762	substantia nigra development	16	0.556628604255368	1.59876966644598	0.0326126480590261	0.455833607442795	0.435445888264406	260	tags=25%, list=8%, signal=23%	CDC42/CKB/YWHAH/YWHAQ
GO:0060414	BP	GO:0060414	aorta smooth muscle tissue morphogenesis	3	0.87061822410724	1.51132635528987	0.0326251876294743	0.455833607442795	0.435445888264406	266	tags=67%, list=9%, signal=61%	MYLK/COL3A1
GO:0010612	BP	GO:0010612	regulation of cardiac muscle adaptation	3	0.870181282746768	1.51056785865436	0.0329856832925229	0.459253302823617	0.438712633560019	378	tags=67%, list=12%, signal=59%	LMNA/ATP2B4
GO:1903242	BP	GO:1903242	regulation of cardiac muscle hypertrophy in response to stress	3	0.870181282746768	1.51056785865436	0.0329856832925229	0.459253302823617	0.438712633560019	378	tags=67%, list=12%, signal=59%	LMNA/ATP2B4
GO:0140097	MF	GO:0140097	catalytic activity, acting on DNA	56	-0.455564706392337	-1.52524749374826	0.0331237514178682	0.460367935643086	0.439777413054635	382	tags=34%, list=12%, signal=30%	DHX30/CHD4/CHD3/WRNIP1/RECQL/MCM3/FEN1/TOP2B/MCM4/RAD50/EXOG/MSH2/RFC4/POLD1/TDP2/MYO18A/DNMT1/ERCC4/MYD88
GO:0051493	BP	GO:0051493	regulation of cytoskeleton organization	160	0.28972102281442	1.3346525881993	0.033334750712725	0.462490527370954	0.441805069254777	472	tags=20%, list=15%, signal=18%	FLNA/S100A9/TPM1/CDC42/DSTN/CLIP1/ALOX15/TWF1/COTL1/CFL2/CAPG/CLIC4/APOA1/DRG1/SYNPO2/PFDN2/MAP1B/CHMP4B/WASHC5/TWF2/NEXN/ACTG1/CD47/FLNA/FES/TMOD3/ARPC5/SORBS3/SVIL/NCKAP1/SH3BP1/ACTN2/KANK2
GO:0003015	BP	GO:0003015	heart process	50	0.377481714663185	1.44488166866938	0.0336034353417343	0.465404647246079	0.444588851531497	503	tags=31%, list=16%, signal=26%	FLNA/TPM1/DES/CDC42/ATP1B1/GPX1/FLNA/SNTA1/GPD1L/ATP2B4/DMD/ATP2A2/ATP1A2/HSPB7/CLIC2/CALM3
GO:0090559	BP	GO:0090559	regulation of membrane permeability	15	-0.608378783705557	-1.55163605524632	0.033686627889324	0.465744039947169	0.444913064476272	379	tags=40%, list=12%, signal=35%	RASIP1/ACAA2/MTOR/BAK1/ATP5IF1/HIP1R
GO:0036041	MF	GO:0036041	long-chain fatty acid binding	7	0.734188135471442	1.61925680971886	0.0338542370457333	0.466436154852325	0.445574223690371	646	tags=71%, list=21%, signal=57%	S100A9/FABP1/FABP3/ALOX5AP/FABP2
GO:0090068	BP	GO:0090068	positive regulation of cell cycle process	48	-0.475377678465415	-1.55615833674182	0.03382949932341	0.466436154852325	0.445574223690371	766	tags=48%, list=25%, signal=37%	MEPCE/SMC5/CDC73/TPR/DDRGK1/RRM2B/WNK1/PLCG2/CDK1/PDGFRB/RDX/SMC2/RAD21/FEN1/PLSCR1/RRM1/NCAPD2/SMC4/NCAPG/RRM2/CDK4/EIF4G1/PKP4
GO:0031099	BP	GO:0031099	regeneration	41	0.411418446172433	1.50339612918933	0.0341887383275805	0.470228470307936	0.449196923169269	394	tags=26%, list=13%, signal=23%	FLNA/POSTN/GFAP/SPP1/MAP1B/CD9/MAP2K2/GPX1/FLNA/GRN/COL6A1
GO:0022603	BP	GO:0022603	regulation of anatomical structure morphogenesis	169	0.274879456548376	1.26217980442283	0.0342574886783673	0.470358875694677	0.449321496014572	385	tags=18%, list=13%, signal=16%	RHOB/TPM1/INF2/LIMD1/ANXA1/CHI3L1/PARVA/HSPB1/CFL1/RRAS/PDCD6/ITGA5/SPP1/HSPB6/MAP1B/TWF2/YWHAH/ALDOA/VAT1/SARM1/MAP2K2/ERAP1/ITGA7/STRIP1/FN1/PGK1/GRN/IST1/ATP2B4/FES
GO:2001046	BP	GO:2001046	positive regulation of integrin-mediated signaling pathway	6	0.754248765629213	1.60631794938295	0.0343902377063161	0.471366021480699	0.450283595965619	701	tags=86%, list=23%, signal=66%	FLNA/LAMC1/FLNA/LAMB1/NID1/LAMB2
GO:0006068	BP	GO:0006068	ethanol catabolic process	3	0.868531599437204	1.50770413515927	0.0347881621716227	0.475178752141133	0.453925797554175	179	tags=67%, list=6%, signal=63%	ALDH1B1/SULT1A3
GO:0034310	BP	GO:0034310	primary alcohol catabolic process	3	0.868531599437204	1.50770413515927	0.0347881621716227	0.475178752141133	0.453925797554175	179	tags=67%, list=6%, signal=63%	ALDH1B1/SULT1A3
GO:1903902	BP	GO:1903902	positive regulation of viral life cycle	8	0.700143776677851	1.60621285042163	0.0351658430424038	0.477053214332507	0.455716422116765	567	tags=75%, list=18%, signal=61%	LGALS1/TRIM21/FMR1/LGALS9/P4HB/HMGB1
GO:0086001	BP	GO:0086001	cardiac muscle cell action potential	21	0.496047360000492	1.54962468421992	0.0351314987126103	0.477053214332507	0.455716422116765	503	tags=45%, list=16%, signal=38%	FLNA/SLMAP/ATP1B1/FLNA/SNTA1/GPD1L/DMD/ATP2A2/ATP1A2/CALM3
GO:0030312	CC	GO:0030312	external encapsulating structure	177	0.274732706973667	1.27814983395724	0.0351314193609121	0.477053214332507	0.455716422116765	398	tags=24%, list=13%, signal=22%	S100A9/S100A6/LOXL2/COL6A3/FCN2/PRTN3/ELANE/POSTN/MMP9/COL2A1/ANXA1/CHI3L1/FMOD/AHSG/TGM2/CLU/APOA1/SPON1/LAMC1/LGALS1/FGL2/SOD3/ACTA2/COL14A1/SERPINB1/HDGF/GPLD1/COL6A3/APOC3/COL3A1/S100A4/LAMA4/COL1A1/SPARCL1/CSTB/LGALS9/FN1/CD151/SERPINH1/COL6A5/COL15A1/HNRNPM/COL6A1/ANXA6
GO:0031012	CC	GO:0031012	extracellular matrix	177	0.274732706973667	1.27814983395724	0.0351314193609121	0.477053214332507	0.455716422116765	398	tags=24%, list=13%, signal=22%	S100A9/S100A6/LOXL2/COL6A3/FCN2/PRTN3/ELANE/POSTN/MMP9/COL2A1/ANXA1/CHI3L1/FMOD/AHSG/TGM2/CLU/APOA1/SPON1/LAMC1/LGALS1/FGL2/SOD3/ACTA2/COL14A1/SERPINB1/HDGF/GPLD1/COL6A3/APOC3/COL3A1/S100A4/LAMA4/COL1A1/SPARCL1/CSTB/LGALS9/FN1/CD151/SERPINH1/COL6A5/COL15A1/HNRNPM/COL6A1/ANXA6
GO:0005516	MF	GO:0005516	calmodulin binding	50	0.375730525723996	1.43817866638259	0.0353566149655844	0.478822690045867	0.457406755850797	599	tags=31%, list=19%, signal=26%	PCP4/CNN1/MYLK/MARCKS/CNN2/WFS1/MYH11/CALD1/SNTA1/ATP2B4/ADD1/IQGAP1/MYH9/AKAP12/MAPKAPK2/MYH11
GO:0086013	BP	GO:0086013	membrane repolarization during cardiac muscle cell action potential	4	0.839192243897271	1.57354174941026	0.0355032233883985	0.479989064412829	0.458520962688507	327	tags=60%, list=11%, signal=54%	FLNA/ATP1B1/FLNA
GO:0045860	BP	GO:0045860	positive regulation of protein kinase activity	51	0.368648622193189	1.4184958362543	0.0356889429018778	0.481679338213099	0.460135636912502	378	tags=20%, list=12%, signal=17%	S100A12/AZU1/ELANE/LTF/CHI3L1/CACUL1/MAP2K2/PHB1/LCP2/ATP2B4
GO:0045217	BP	GO:0045217	cell-cell junction maintenance	5	0.790688577150553	1.5943341283406	0.0360238383326237	0.483217080669993	0.461604601945205	78	tags=40%, list=3%, signal=39%	PRTN3/CD177
GO:1901991	BP	GO:1901991	negative regulation of mitotic cell cycle phase transition	28	-0.531305243953596	-1.56615045287424	0.0359135575395954	0.483217080669993	0.461604601945205	743	tags=55%, list=24%, signal=42%	ZW10/CDC73/TPR/BUB3/CDK1/SDE2/BABAM1/RAD21/BRCC3/RAD50/RPL26/TRIP13/USP47/CRLF3/RPS27L/PRKDC
GO:0090314	BP	GO:0090314	positive regulation of protein targeting to membrane	11	-0.658870023058606	-1.54761257521736	0.0361682139513578	0.483217080669993	0.461604601945205	587	tags=55%, list=19%, signal=44%	PDZK1/CDK5/CHP1/SLC51B/ERBB2/AKT2
GO:1903900	BP	GO:1903900	regulation of viral life cycle	40	0.41335854522915	1.48756152417913	0.036084975431436	0.483217080669993	0.461604601945205	375	tags=29%, list=12%, signal=26%	MX1/LTF/FAM111A/LGALS1/MX1/ISG15/ZC3HAV1/TRIM21/TOP2A/FMR1/LGALS9/P4HB
GO:0010623	BP	GO:0010623	programmed cell death involved in cell development	3	-0.8823234929369	-1.45443046229451	0.0361138930857082	0.483217080669993	0.461604601945205	10	tags=100%, list=0%, signal=100%	DDB1/PRKDC
GO:0035234	BP	GO:0035234	ectopic germ cell programmed cell death	3	-0.8823234929369	-1.45443046229451	0.0361138930857082	0.483217080669993	0.461604601945205	10	tags=100%, list=0%, signal=100%	DDB1/PRKDC
GO:0071456	BP	GO:0071456	cellular response to hypoxia	29	0.4442872629064	1.49801136071096	0.0363724508078403	0.483670307720134	0.462037557857652	532	tags=37%, list=17%, signal=31%	CLCA1/LMNA/SLC2A4/AK4/HP1BP3/FABP1/PGK1/P4HB/PTGIS/TGFB1/ENO1
GO:0060047	BP	GO:0060047	heart contraction	46	0.392415452678145	1.47484757711839	0.0362937697458845	0.483670307720134	0.462037557857652	503	tags=33%, list=16%, signal=28%	FLNA/TPM1/DES/CDC42/ATP1B1/GPX1/FLNA/SNTA1/GPD1L/ATP2B4/DMD/ATP2A2/ATP1A2/HSPB7/CLIC2/CALM3
GO:0009896	BP	GO:0009896	positive regulation of catabolic process	120	-0.391312822341472	-1.44396217870971	0.0363849765258216	0.483670307720134	0.462037557857652	762	tags=27%, list=25%, signal=21%	DCPS/FXR2/GGA3/ELAVL1/TOM1/SYNCRIP/DDRGK1/NDUFA13/MOV10/FXR1/APOE/PIP4K2A/UBQLN1/SORL1/CNOT2/GTPBP1/CSDE1/HNRNPD/SPTLC1/RDX/PSMC5/CSNK2A1/PLIN5/CNOT1/KEAP1/MTOR/CAV1/SLC4A4/BCAP31/DDA1/AKT2/ALKBH5
GO:0010800	BP	GO:0010800	positive regulation of peptidyl-threonine phosphorylation	6	0.749040281795196	1.59522548035561	0.0371103416225753	0.483814953561803	0.462175734236008	503	tags=67%, list=16%, signal=56%	AZU1/CHI3L1/UBE2K/CALM3
GO:0003785	MF	GO:0003785	actin monomer binding	6	0.748159932567262	1.59335060719572	0.0374989280551258	0.483814953561803	0.462175734236008	219	tags=33%, list=7%, signal=31%	TWF1/TWF2
GO:0051496	BP	GO:0051496	positive regulation of stress fiber assembly	14	0.571375664550133	1.58267706102364	0.0378444515665952	0.483814953561803	0.462175734236008	403	tags=33%, list=13%, signal=29%	TPM1/CDC42/APOA1/CD47/SORBS3
GO:0003724	MF	GO:0003724	RNA helicase activity	36	-0.506335688775534	-1.57560787820776	0.037800067337371	0.483814953561803	0.462175734236008	808	tags=47%, list=26%, signal=35%	RIGI/DHX37/DHX30/DDX21/DDX46/MOV10/DDX42/SNRNP200/DHX34/DDX17/DHX40/DDX27/DDX47/DDX23/MTREX/DDX39B/DDX10
GO:0008186	MF	GO:0008186	ATP-dependent activity, acting on RNA	36	-0.506335688775534	-1.57560787820776	0.037800067337371	0.483814953561803	0.462175734236008	808	tags=47%, list=26%, signal=35%	RIGI/DHX37/DHX30/DDX21/DDX46/MOV10/DDX42/SNRNP200/DHX34/DDX17/DHX40/DDX27/DDX47/DDX23/MTREX/DDX39B/DDX10
GO:0098743	BP	GO:0098743	cell aggregation	4	0.837045285008939	1.56951605747897	0.0374017738464106	0.483814953561803	0.462175734236008	390	tags=75%, list=13%, signal=66%	LTF/COL2A1/MAPK14
GO:0051304	BP	GO:0051304	chromosome separation	20	-0.572164905594857	-1.55343749624888	0.0378076191001292	0.483814953561803	0.462175734236008	743	tags=55%, list=24%, signal=42%	ZW10/TPR/BUB3/SMC2/RAD21/CSNK2A1/PLSCR1/TRIP13/NCAPD2/SMC4/NCAPG
GO:0035371	CC	GO:0035371	microtubule plus-end	9	0.657949811536407	1.54266637062658	0.0372964549772724	0.483814953561803	0.462175734236008	175	tags=33%, list=6%, signal=32%	CLIP1/CLIP2/TBCB
GO:1903312	BP	GO:1903312	negative regulation of mRNA metabolic process	37	-0.492707512435609	-1.54067837404828	0.0370898716119829	0.483814953561803	0.462175734236008	711	tags=46%, list=23%, signal=36%	ELAVL1/SYNCRIP/SRSF7/HNRNPAB/CSDE1/HNRNPD/DHX34/SRSF10/TAF15/HNRNPA2B1/U2AF2/RBM10/SRSF6/RBMX/IGF2BP2/SRSF4/MYD88
GO:0003206	BP	GO:0003206	cardiac chamber morphogenesis	9	0.655969645588042	1.53802356145901	0.0377178793884131	0.483814953561803	0.462175734236008	207	tags=27%, list=7%, signal=26%	TPM1/PARVA/FKBP1A
GO:2001252	BP	GO:2001252	positive regulation of chromosome organization	35	-0.499316383403291	-1.53421437815602	0.0376811594202899	0.483814953561803	0.462175734236008	740	tags=42%, list=24%, signal=32%	SMC5/TPR/CDK1/HNRNPD/CCT3/CTNNB1/SMC2/RAD21/HNRNPA2B1/FEN1/RAD50/NCAPD2/UCHL5/SMC4/NCAPG
GO:0061640	BP	GO:0061640	cytoskeleton-dependent cytokinesis	42	0.412966209616121	1.52421903553097	0.0374019097029164	0.483814953561803	0.462175734236008	523	tags=26%, list=17%, signal=22%	RHOB/CFL1/CHMP4B/WASHC5/ACTR2/IST1/EXOC7/SEPTIN2/SEPTIN9/CHMP2A/IQGAP1
GO:0030193	BP	GO:0030193	regulation of blood coagulation	25	-0.528701781687833	-1.51591409570522	0.0367647058823529	0.483814953561803	0.462175734236008	267	tags=40%, list=9%, signal=37%	PRDX2/SERPINF2/APOE/PLG/SERPING1/CAV1/KNG1/FGG/FGB/FGA
GO:1900046	BP	GO:1900046	regulation of hemostasis	25	-0.528701781687833	-1.51591409570522	0.0367647058823529	0.483814953561803	0.462175734236008	267	tags=40%, list=9%, signal=37%	PRDX2/SERPINF2/APOE/PLG/SERPING1/CAV1/KNG1/FGG/FGB/FGA
GO:1902083	BP	GO:1902083	negative regulation of peptidyl-cysteine S-nitrosylation	3	0.8671875	1.50537088179135	0.0365906418886439	0.483814953561803	0.462175734236008	411	tags=100%, list=13%, signal=87%	SNTA1/ATP2B4/DMD
GO:0000281	BP	GO:0000281	mitotic cytokinesis	31	0.43426142881903	1.49346570873246	0.037749233423957	0.483814953561803	0.462175734236008	205	tags=10%, list=7%, signal=9%	RHOB/CFL1/CHMP4B
GO:0045787	BP	GO:0045787	positive regulation of cell cycle	58	-0.444480607433183	-1.49142431778702	0.0378590078328982	0.483814953561803	0.462175734236008	766	tags=43%, list=25%, signal=33%	MEPCE/SMC5/CDC73/TPR/DDRGK1/PTPN11/RRM2B/ASNS/WNK1/PLCG2/CDK1/PDGFRB/RDX/SMC2/RAD21/FEN1/PLSCR1/RRM1/NCAPD2/SMC4/NCAPG/RRM2/CDK4/EIF4G1/PKP4
GO:0034765	BP	GO:0034765	regulation of monoatomic ion transmembrane transport	60	0.370192380444674	1.47382667467254	0.0366195985249947	0.483814953561803	0.462175734236008	503	tags=32%, list=16%, signal=28%	FLNA/SLMAP/MMP9/ATP1B1/STOM/FKBP1A/YWHAH/NIPSNAP2/TCIRG1/YWHAQ/FMR1/FLNA/SNTA1/GPD1L/ATP2B4/DMD/ATP1A2/ACTN2/CLIC2/CALM3
GO:0004674	MF	GO:0004674	protein serine/threonine kinase activity	67	-0.427715734677004	-1.4605901255635	0.0369897959183673	0.483814953561803	0.462175734236008	385	tags=21%, list=13%, signal=19%	CSNK2A1/CCNK/BRD2/GRK2/MTOR/STK38L/PRKCB/ARAF/MAP4K1/CDK4/AKT2/TP53RK/PRKDC/RPS6KA5
GO:0022613	BP	GO:0022613	ribonucleoprotein complex biogenesis	177	-0.366766343812054	-1.41251256738059	0.0368715083798883	0.483814953561803	0.462175734236008	912	tags=35%, list=30%, signal=26%	EBNA1BP2/RPS13/ADAR/RPL7A/HTATSF1/RPS15A/PRKRA/WDR3/EIF5/BOP1/RPS25/SART1/DHX37/RPS14/DHX30/SRSF1/TRMT112/CDC73/RAN/DDX21/NOB1/RPS4X/RPS17/DDX46/GEMIN5/RPS21/SNRPF/DDX42/PELP1/CRNKL1/SNRNP200/CPSF7/SDE2/RPL35/RPS23/SRSF10/DDX17/EIF3I/DDX27/MRM1/TSR1/DDX47/SNRPD3/EIF3A/SRSF5/U2AF2/DDX23/SRSF6/RPL26/XRN2/RPS19/MTREX/SNRPG/RPS5/DDX39B/ZNF593/DDX10/FTSJ3/RPS27L/NUDT21/CELF2/RPL26L1/PRKDC
GO:0005766	CC	GO:0005766	primary lysosome	81	0.330375267876601	1.37097420085306	0.0377876459733121	0.483814953561803	0.462175734236008	415	tags=23%, list=13%, signal=21%	ARG1/PRTN3/AZU1/ELANE/MPO/CYB5R3/TXNDC5/STOM/PIGR/TUBB/VAT1/RAP1B/PRDX6/ACTR2/CPNE3/GRN/IST1/GLB1/GNS
GO:0042582	CC	GO:0042582	azurophil granule	81	0.330375267876601	1.37097420085306	0.0377876459733121	0.483814953561803	0.462175734236008	415	tags=23%, list=13%, signal=21%	ARG1/PRTN3/AZU1/ELANE/MPO/CYB5R3/TXNDC5/STOM/PIGR/TUBB/VAT1/RAP1B/PRDX6/ACTR2/CPNE3/GRN/IST1/GLB1/GNS
GO:0031252	CC	GO:0031252	cell leading edge	141	0.293682737866671	1.33269149492752	0.0375183702710509	0.483814953561803	0.462175734236008	310	tags=17%, list=10%, signal=16%	TPM1/S100A11/S100A6/CDC42/PDLIM7/CLIP1/MYLK/CD177/ACTA1/TWF1/PARVA/CAPG/CFL1/NME2/SORBS2/ACTA2/ITGA5/ABLIM1/ACTN1/TWF2/SH3BGRL3/DPYSL3/ACAP2/PALLD
GO:0045296	MF	GO:0045296	cadherin binding	200	0.267966289103851	1.27002752404882	0.0372386165670298	0.483814953561803	0.462175734236008	534	tags=25%, list=17%, signal=22%	FLNA/S100A11/OLFM4/TES/GOLGA2/ANXA1/TWF1/PARVA/CAPG/CNN2/BAG3/BSG/PPME1/VCL/RPL29/CLIC1/ZC3HAV1/GIGYF2/CHMP4B/CALD1/SERBP1/TWF2/ALDOA/PRDX6/TAGLN2/IDH1/FLNA/CC2D1A/IST1/EFHD2/YWHAZ/ESYT2/TMOD3/TLN1/ARHGAP1/EVPL/SEPTIN2/SEPTIN9/PKM/PICALM/EIF2S3/EMD/RAB10/ADD1/NOP56/HNRNPK/NIBAN2/IQGAP1/MYH9/ENO1/PPP1CA
GO:0035148	BP	GO:0035148	tube formation	22	-0.548103867428039	-1.5254329683607	0.0380673499267936	0.485695319966292	0.463971998938513	480	tags=36%, list=16%, signal=31%	CTNNB1/HS2ST1/MMRN2/CASP3/BRD2/APAF1/PLXNB2/TMED2
GO:0002888	BP	GO:0002888	positive regulation of myeloid leukocyte mediated immunity	11	0.621725285772303	1.61378098199934	0.038628075853753	0.489067690562249	0.467193536108515	78	tags=18%, list=3%, signal=18%	ARG1/CD177
GO:0071889	MF	GO:0071889	14-3-3 protein binding	8	0.696444164509075	1.59772550138704	0.0388246780562269	0.489067690562249	0.467193536108515	260	tags=50%, list=8%, signal=46%	SYNPO2/HDAC7/PPP1R12A/YWHAQ
GO:0006354	BP	GO:0006354	DNA-templated transcription elongation	29	-0.514325401602434	-1.52753141482592	0.0385185185185185	0.489067690562249	0.467193536108515	710	tags=31%, list=23%, signal=24%	CDC73/ADRM1/CTNNB1/SCAF8/CCNK/ZNF326/POLR2E/INTS5/SUPT6H
GO:0050542	MF	GO:0050542	icosanoid binding	3	0.865211203920335	1.50194018361808	0.0387642743584316	0.489067690562249	0.467193536108515	10	tags=33%, list=0%, signal=33%	S100A9
GO:0050543	MF	GO:0050543	icosatetraenoic acid binding	3	0.865211203920335	1.50194018361808	0.0387642743584316	0.489067690562249	0.467193536108515	10	tags=33%, list=0%, signal=33%	S100A9
GO:0050544	MF	GO:0050544	arachidonic acid binding	3	0.865211203920335	1.50194018361808	0.0387642743584316	0.489067690562249	0.467193536108515	10	tags=33%, list=0%, signal=33%	S100A9
GO:0006015	BP	GO:0006015	5-phosphoribose 1-diphosphate biosynthetic process	4	-0.839771024592113	-1.48813554270761	0.0388229618811247	0.489067690562249	0.467193536108515	231	tags=75%, list=8%, signal=69%	PRPSAP2/PRPS1/PRPS2
GO:0046391	BP	GO:0046391	5-phosphoribose 1-diphosphate metabolic process	4	-0.839771024592113	-1.48813554270761	0.0388229618811247	0.489067690562249	0.467193536108515	231	tags=75%, list=8%, signal=69%	PRPSAP2/PRPS1/PRPS2
GO:0034331	BP	GO:0034331	cell junction maintenance	9	0.655233918050229	1.53629853302883	0.0389821529093994	0.489497413748408	0.467604039396227	78	tags=22%, list=3%, signal=22%	PRTN3/CD177
GO:0000910	BP	GO:0000910	cytokinesis	56	0.360500037498502	1.41209631617217	0.0389348685356928	0.489497413748408	0.467604039396227	524	tags=29%, list=17%, signal=24%	RHOB/CDC42/CENPV/CFL1/CHMP4B/WASHC5/ACTR2/IST1/EXOC7/SEPTIN2/SVIL/SEPTIN9/CALM3/CHMP2A/IQGAP1/MYH9
GO:0002823	BP	GO:0002823	negative regulation of adaptive immune response based on somatic recombination of immune receptors built from immunoglobulin superfamily domains	6	0.744724520197832	1.58603423519219	0.0394418607371097	0.49215504215362	0.470142802099741	5	tags=17%, list=0%, signal=17%	ARG1
GO:0071013	CC	GO:0071013	catalytic step 2 spliceosome	57	-0.445810969125492	-1.49663284390882	0.0394218134034166	0.49215504215362	0.470142802099741	818	tags=44%, list=27%, signal=33%	LSM3/SART1/RALY/SRSF1/SYNCRIP/SNRPF/CDC40/CRNKL1/SNRNP200/HNRNPM/CDC5L/EFTUD2/SNRPD3/PPIL2/HNRNPA2B1/DDX23/RBM8A/RBMX/MTREX/PNN/SNRPG/HNRNPA3/RBM22/BCAS2/ALYREF/SNRPN
GO:0002191	BP	GO:0002191	cap-dependent translational initiation	4	-0.83837592520971	-1.48566332478657	0.0393175152594908	0.49215504215362	0.470142802099741	162	tags=50%, list=5%, signal=47%	NCK1/EIF4G1
GO:0110053	BP	GO:0110053	regulation of actin filament organization	98	0.311978804204928	1.34119149704616	0.039320715790487	0.49215504215362	0.470142802099741	617	tags=31%, list=20%, signal=26%	FLNA/TPM1/CDC42/DSTN/ALOX15/TWF1/COTL1/CFL2/CAPG/APOA1/SYNPO2/WASHC5/TWF2/ACTG1/CD47/FLNA/TMOD3/ARPC5/SORBS3/SVIL/NCKAP1/SH3BP1/ACTN2/KANK2/ADD1/LMOD1/SSH3/MYADM/FLII/CAPZB/SYNPO
GO:0033044	BP	GO:0033044	regulation of chromosome organization	67	-0.41442346865588	-1.41519887403173	0.0395408163265306	0.492615256463653	0.470582432758281	743	tags=35%, list=24%, signal=27%	ZW10/SMC5/TPR/TRAPPC12/BUB3/CDK1/HNRNPD/CCT3/CDC27/CTNNB1/SMC2/RAD21/HNRNPA2B1/ARID1A/FEN1/RAD50/YLPM1/TRIP13/SMARCD1/NCAPD2/UCHL5/SMC4/NCAPG/ERCC4
GO:0022626	CC	GO:0022626	cytosolic ribosome	81	-0.41371479085047	-1.44704753334366	0.0397022332506203	0.493850976609597	0.47176288379965	960	tags=42%, list=31%, signal=30%	RPL28/RACK1/RPS13/RPL8/RPL7A/RPS15A/RPL18/RPS25/RPS14/RPS10/EEF1A1/GCN1/RPS4X/RPS17/RPS21/RPL24/RPL31/RPL13/RPL35/RPS23/NEMF/RPL3/RPL4/RPL23/RPL26/RPL19/RPS19/RPS26/RPL15/RPS5/RPS29/RPL32/RPS27L/RPL26L1
GO:1901987	BP	GO:1901987	regulation of cell cycle phase transition	79	-0.426486696456342	-1.4875321709342	0.0398103984131851	0.494421473876427	0.472307864873996	766	tags=42%, list=25%, signal=33%	MEPCE/ZW10/CDC73/TPR/DDRGK1/PTPN11/RRM2B/PLCG2/BUB3/CDK1/SDE2/BABAM1/RDX/CDC5L/RAD21/XPC/BRCC3/ARID1A/WDR76/FBXO6/RAD50/RPL26/MSH2/TRIP13/SMARCD1/RRM1/USP47/CRLF3/PPP1R9B/RRM2/CDK4/RPS27L/EIF4G1/PRKDC
GO:0005253	MF	GO:0005253	monoatomic anion channel activity	10	0.642126026327661	1.57743249377224	0.0401030202811762	0.497231263640475	0.474991983332277	166	tags=27%, list=5%, signal=26%	CLCA1/CLIC4/CLIC1
GO:0045824	BP	GO:0045824	negative regulation of innate immune response	24	0.48451074747506	1.57220396774643	0.0402246057531735	0.497231263640475	0.474991983332277	381	tags=33%, list=12%, signal=29%	ARG1/ISG15/GIGYF2/TRIM21/SAMHD1/LGALS9/GRN/YWHAZ
GO:0016482	BP	GO:0016482	cytosolic transport	43	-0.470522379337995	-1.50644751818105	0.0401662049861496	0.497231263640475	0.474991983332277	633	tags=37%, list=21%, signal=30%	KIF5B/SNX2/EHD3/PIP4K2A/ARFIP1/ANKFY1/LAMP1/VTI1A/SNX12/SRSF10/VPS51/TBC1D5/EIPR1/GBF1/MON2/AP1G1
GO:0048048	BP	GO:0048048	embryonic eye morphogenesis	4	-0.835664325357634	-1.48085817195407	0.0403066222592747	0.497470224338419	0.475220256218869	389	tags=75%, list=13%, signal=66%	FBN1/MFAP2/EFEMP1
GO:0018205	BP	GO:0018205	peptidyl-lysine modification	23	0.490464097872305	1.56027068969466	0.0407800614172924	0.502090422099117	0.479633809947718	190	tags=17%, list=6%, signal=16%	PLOD1/LOXL2/SUMO3/HDAC7
GO:0141124	BP	GO:0141124	intracellular signaling cassette	356	0.233894972398028	1.17769230446604	0.0408075002840134	0.502090422099117	0.479633809947718	509	tags=22%, list=17%, signal=21%	RHOB/S100A12/FLNA/CDC42/COL6A3/AZU1/ELANE/LTF/CREB1/ALOX15/CHI3L1/HSPB1/CFL1/TGM2/APOA1/DDT/RRAS/ARHGDIB/LGALS1/COPS5/RAB12/ATP1B1/GLIPR2/PDCD6/ACTA2/HDAC7/RGS19/NCOR1/FKBP1A/TRIM21/IKBKG/RAP1B/COL6A3/UBE2V1/YWHAQ/MAP2K2/APOC3/COL3A1/PEBP1/S100A4/SPINK1/GNB1/NFKB1/PHB1/GPX1/FLNA/LGALS9/FN1/CC2D1A/RAB18/ATP2B4/YWHAZ/MAPK14/COL6A1/SORBS3/FARP1/ARHGAP1/DMD/OPTN/ATP2A2/SIRPA/CRYAB/ATP1A2/PRKG1/PPP2R1…
GO:0006376	BP	GO:0006376	mRNA splice site recognition	11	-0.653226051437123	-1.53435551213983	0.0408960216283271	0.502400661985145	0.47993017397297	719	tags=45%, list=23%, signal=35%	SRSF1/SRSF10/SRSF5/SRSF6/CELF2
GO:0005687	CC	GO:0005687	U4 snRNP	8	-0.721550434641711	-1.56495193040312	0.0410094637223975	0.503015616848449	0.480517624223065	640	tags=62%, list=21%, signal=50%	SNRPF/SNRPD3/SNRPG/DDX39B/SNRPN
GO:0032200	BP	GO:0032200	telomere organization	45	-0.464060889690531	-1.50440038702138	0.0410958904109589	0.503297818366311	0.480787203930679	540	tags=26%, list=18%, signal=22%	H3C1/HNRNPD/CCT3/CTNNB1/HNRNPA2B1/FEN1/RAD50/YLPM1/UCHL5/HAT1/ERCC4/PRKDC
GO:0007416	BP	GO:0007416	synapse assembly	20	-0.564171150064229	-1.53173431338027	0.0411764705882353	0.503507658841657	0.480987659032472	785	tags=55%, list=26%, signal=41%	DBNL/OGT/CHD4/ADNP/CDK5/CTNNB1/NECTIN1/GNPAT/CDH1/PLXNB2/EIF4G1
GO:0016775	MF	GO:0016775	phosphotransferase activity, nitrogenous group as acceptor	4	0.832454069111816	1.56090721969809	0.0415935533603406	0.507106218073699	0.484425268273395	153	tags=75%, list=5%, signal=71%	CKM/CKB/NME2
GO:0061307	BP	GO:0061307	cardiac neural crest cell differentiation involved in heart development	3	0.862884247123024	1.49790076537709	0.0416624564244017	0.507106218073699	0.484425268273395	24	tags=33%, list=1%, signal=33%	CDC42
GO:0061308	BP	GO:0061308	cardiac neural crest cell development involved in heart development	3	0.862884247123024	1.49790076537709	0.0416624564244017	0.507106218073699	0.484425268273395	24	tags=33%, list=1%, signal=33%	CDC42
GO:1902305	BP	GO:1902305	regulation of sodium ion transmembrane transport	14	0.566200951280553	1.56834340893227	0.0418280348002178	0.508341935948742	0.485605717145431	437	tags=57%, list=14%, signal=49%	SLMAP/ATP1B1/YWHAH/SNTA1/GPD1L/ATP2B4/DMD/ATP1A2
GO:0045920	BP	GO:0045920	negative regulation of exocytosis	10	0.638048868698478	1.56741663915366	0.0421808788438534	0.510036100177601	0.487224107793809	342	tags=50%, list=11%, signal=45%	ANXA1/RAP1B/FMR1/LGALS9/STXBP3
GO:0000075	BP	GO:0000075	cell cycle checkpoint signaling	33	-0.490156083340454	-1.49946300065346	0.0420899854862119	0.510036100177601	0.487224107793809	743	tags=53%, list=24%, signal=41%	ZW10/TPR/PTPN11/BUB3/CDK1/SDE2/BABAM1/CDC5L/XPC/BRCC3/WDR76/FBXO6/RAD50/RPL26/MSH2/TRIP13/RPS27L/PRKDC
GO:0051537	MF	GO:0051537	2 iron, 2 sulfur cluster binding	6	-0.754419951935582	-1.48058854063635	0.0421393841166937	0.510036100177601	0.487224107793809	426	tags=50%, list=14%, signal=43%	FDX2/CIAPIN1/CISD2
GO:0010605	BP	GO:0010605	negative regulation of macromolecule metabolic process	527	-0.299236136159713	-1.2318915040979	0.0422245108135942	0.510036100177601	0.487224107793809	711	tags=25%, list=23%, signal=23%	ELAVL1/CDC73/RAN/TPR/SYNCRIP/INPP5D/DDRGK1/DDX21/NDUFA13/MRPL13/MICAL1/ANXA4/SERPINF2/CORO1C/MOV10/FXR1/FOXK1/PTPN11/CTSZ/MAFG/CHD3/DHRS7B/APOE/SRSF7/WNK1/FBP1/PRMT3/PPP1R8/CHMP1A/ADNP/SRSF3/HNRNPAB/GATAD2B/MTPAP/CDK1/SORL1/RTN1/SMCHD1/CNOT2/CTBP1/SWAP70/GTPBP1/CSDE1/HNRNPD/CDK5/SNX12/CTNNB1/DHX34/SRSF10/RAD21/CTSA/TAF15/DDX17/FKBP1A/SHMT1/GIT1/CHP1/PPM1B/NCOA5/PSMC5/STRN3/HNF4A/CD22/NIBAN1/EPRS1…
GO:0006378	BP	GO:0006378	mRNA polyadenylation	8	-0.717380281483057	-1.55590739391282	0.0425867507886435	0.510293315400353	0.487469818749117	558	tags=50%, list=18%, signal=41%	MTPAP/SCAF8/SYMPK/NUDT21
GO:0043903	BP	GO:0043903	regulation of biological process involved in symbiotic interaction	16	0.541405340430594	1.55504483405094	0.0444716252793568	0.510293315400353	0.487469818749117	424	tags=44%, list=14%, signal=38%	ARG1/LTF/LGALS1/TRIM21/LGALS9/P4HB/EXOC7
GO:0019829	MF	GO:0019829	ATPase-coupled monoatomic cation transmembrane transporter activity	17	0.528997003645426	1.55102308196529	0.0445589114235291	0.510293315400353	0.487469818749117	437	tags=35%, list=14%, signal=30%	ATP1B1/TCIRG1/ATP13A1/ATP2B4/ATP2A2/ATP1A2
GO:0007093	BP	GO:0007093	mitotic cell cycle checkpoint signaling	23	-0.550072909709173	-1.55075947382208	0.0432352988898741	0.510293315400353	0.487469818749117	743	tags=58%, list=24%, signal=45%	ZW10/TPR/BUB3/CDK1/SDE2/BABAM1/XPC/BRCC3/RAD50/RPL26/MSH2/TRIP13/RPS27L/PRKDC
GO:0097345	BP	GO:0097345	mitochondrial outer membrane permeabilization	9	-0.684567180740588	-1.54185154582003	0.0432766615146832	0.510293315400353	0.487469818749117	275	tags=44%, list=9%, signal=41%	ACAA2/BAK1/ATP5IF1/HIP1R
GO:1902108	BP	GO:1902108	regulation of mitochondrial membrane permeability involved in apoptotic process	9	-0.684567180740588	-1.54185154582003	0.0432766615146832	0.510293315400353	0.487469818749117	275	tags=44%, list=9%, signal=41%	ACAA2/BAK1/ATP5IF1/HIP1R
GO:1902110	BP	GO:1902110	positive regulation of mitochondrial membrane permeability involved in apoptotic process	9	-0.684567180740588	-1.54185154582003	0.0432766615146832	0.510293315400353	0.487469818749117	275	tags=44%, list=9%, signal=41%	ACAA2/BAK1/ATP5IF1/HIP1R
GO:0001783	BP	GO:0001783	B cell apoptotic process	7	-0.730381913984126	-1.52139921464083	0.042654028436019	0.510293315400353	0.487469818749117	236	tags=29%, list=8%, signal=26%	BAK1/MIF
GO:0008625	BP	GO:0008625	extrinsic apoptotic signaling pathway via death domain receptors	19	-0.566125854924886	-1.52126866844977	0.0427728613569322	0.510293315400353	0.487469818749117	400	tags=32%, list=13%, signal=28%	DDX47/FADD/DAXX/FGG/FGB/FGA
GO:0140318	MF	GO:0140318	protein transporter activity	9	0.647062263273382	1.51713880869184	0.0444689798793342	0.510293315400353	0.487469818749117	353	tags=44%, list=11%, signal=39%	TOMM40/BLOC1S3/SEC63/ATP13A1
GO:0035825	BP	GO:0035825	homologous recombination	7	-0.727396144673804	-1.51517980121225	0.0442338072669826	0.510293315400353	0.487469818749117	466	tags=71%, list=15%, signal=61%	RAD21/TOP2B/RAD50/TRIP13/ERCC4
GO:0030057	CC	GO:0030057	desmosome	11	-0.644249330297928	-1.51327019025078	0.0424528301886792	0.510293315400353	0.487469818749117	485	tags=45%, list=16%, signal=38%	DSG3/DSG2/PNN/POF1B/PKP4
GO:0006706	BP	GO:0006706	steroid catabolic process	3	0.861979166666667	1.49632961523404	0.0431115494360782	0.510293315400353	0.487469818749117	427	tags=100%, list=14%, signal=86%	SPP1/YWHAH/SNX17
GO:0070671	BP	GO:0070671	response to interleukin-12	3	0.861328125	1.49519945691438	0.0431115494360782	0.510293315400353	0.487469818749117	429	tags=100%, list=14%, signal=86%	CD47/P4HB/SIRPA
GO:0071349	BP	GO:0071349	cellular response to interleukin-12	3	0.861328125	1.49519945691438	0.0431115494360782	0.510293315400353	0.487469818749117	429	tags=100%, list=14%, signal=86%	CD47/P4HB/SIRPA
GO:0035988	BP	GO:0035988	chondrocyte proliferation	3	0.860681698881979	1.49407731083259	0.0445606435953182	0.510293315400353	0.487469818749117	230	tags=67%, list=7%, signal=62%	LTF/PBXIP1
GO:0070900	BP	GO:0070900	mitochondrial tRNA modification	3	0.8603515625	1.49350421943488	0.0445606435953182	0.510293315400353	0.487469818749117	432	tags=100%, list=14%, signal=86%	HSD17B10/TRMT5/PUS1
GO:1900864	BP	GO:1900864	mitochondrial RNA modification	3	0.8603515625	1.49350421943488	0.0445606435953182	0.510293315400353	0.487469818749117	432	tags=100%, list=14%, signal=86%	HSD17B10/TRMT5/PUS1
GO:0005355	MF	GO:0005355	glucose transmembrane transporter activity	3	0.859700520833333	1.49237406111522	0.0445606435953182	0.510293315400353	0.487469818749117	434	tags=100%, list=14%, signal=86%	SLC2A4/SLC2A3/SLC45A2
GO:0015144	MF	GO:0015144	carbohydrate transmembrane transporter activity	3	0.859700520833333	1.49237406111522	0.0445606435953182	0.510293315400353	0.487469818749117	434	tags=100%, list=14%, signal=86%	SLC2A4/SLC2A3/SLC45A2
GO:0015145	MF	GO:0015145	monosaccharide transmembrane transporter activity	3	0.859700520833333	1.49237406111522	0.0445606435953182	0.510293315400353	0.487469818749117	434	tags=100%, list=14%, signal=86%	SLC2A4/SLC2A3/SLC45A2
GO:0015149	MF	GO:0015149	hexose transmembrane transporter activity	3	0.859700520833333	1.49237406111522	0.0445606435953182	0.510293315400353	0.487469818749117	434	tags=100%, list=14%, signal=86%	SLC2A4/SLC2A3/SLC45A2
GO:0051119	MF	GO:0051119	sugar transmembrane transporter activity	3	0.859700520833333	1.49237406111522	0.0445606435953182	0.510293315400353	0.487469818749117	434	tags=100%, list=14%, signal=86%	SLC2A4/SLC2A3/SLC45A2
GO:0033206	BP	GO:0033206	meiotic cytokinesis	3	0.859627342170156	1.4922470285776	0.0445606435953182	0.510293315400353	0.487469818749117	317	tags=67%, list=10%, signal=60%	WASHC5/ACTR2
GO:0005581	CC	GO:0005581	collagen trimer	30	0.437319835645449	1.480406229772	0.0435593948923521	0.510293315400353	0.487469818749117	742	tags=53%, list=24%, signal=41%	COL6A3/FCN2/COL2A1/COL14A1/COL6A3/COL3A1/COL1A1/COL6A5/COL15A1/COL6A1/COL6A5/COL28A1/COL4A1/C1QB/COL21A1/COL5A1/COL18A1
GO:0036499	BP	GO:0036499	PERK-mediated unfolded protein response	6	-0.752551336102237	-1.47692128451116	0.0437601296596434	0.510293315400353	0.487469818749117	162	tags=67%, list=5%, signal=63%	PTPN1/AGR2/NCK1/TMED2
GO:0036294	BP	GO:0036294	cellular response to decreased oxygen levels	30	0.435925165832942	1.47568502183533	0.0444716252793568	0.510293315400353	0.487469818749117	532	tags=35%, list=17%, signal=30%	CLCA1/LMNA/SLC2A4/AK4/HP1BP3/FABP1/PGK1/P4HB/PTGIS/TGFB1/ENO1
GO:0014731	CC	GO:0014731	spectrin-associated cytoskeleton	4	-0.815577295935561	-1.44526248985141	0.0427631578947368	0.510293315400353	0.487469818749117	355	tags=100%, list=12%, signal=89%	ANK1/SPTB/SPTA1
GO:0032056	BP	GO:0032056	positive regulation of translation in response to stress	3	-0.875674777723335	-1.44347065671397	0.0437975826032161	0.510293315400353	0.487469818749117	162	tags=67%, list=5%, signal=63%	NCK1/EIF4G1
GO:0036493	BP	GO:0036493	positive regulation of translation in response to endoplasmic reticulum stress	3	-0.875674777723335	-1.44347065671397	0.0437975826032161	0.510293315400353	0.487469818749117	162	tags=67%, list=5%, signal=63%	NCK1/EIF4G1
GO:0048266	BP	GO:0048266	behavioral response to pain	4	-0.813525246054629	-1.44162610770224	0.0427631578947368	0.510293315400353	0.487469818749117	241	tags=50%, list=8%, signal=46%	MTOR/VWA1
GO:0051223	BP	GO:0051223	regulation of protein transport	112	-0.392683473543203	-1.43243274996432	0.0436835891381346	0.510293315400353	0.487469818749117	709	tags=33%, list=23%, signal=26%	RAN/TPR/PDCD5/UBAC2/PTPN11/APOE/PGRMC1/ARFIP1/CDK1/SORL1/CDK5/SNX12/CELA2A/CHP1/GNA11/HNF4A/CHGA/EIPR1/SLC51B/RSC1A1/CHP2/GAPVD1/CDH1/SLC25A22/CD2AP/CD200/PRKCB/GRIPAP1/UBR5/MYO18A/FGG/BCAP31/ERP29/LLGL2/RBM22/FGB/FGA
GO:1901618	MF	GO:1901618	organic hydroxy compound transmembrane transporter activity	3	-0.850911458333333	-1.40265056481268	0.0425894378194208	0.510293315400353	0.487469818749117	462	tags=100%, list=15%, signal=85%	SLC51B/ABCC3
GO:0010032	BP	GO:0010032	meiotic chromosome condensation	3	-0.848958333333333	-1.39943101493171	0.0442930153321976	0.510293315400353	0.487469818749117	468	tags=100%, list=15%, signal=85%	NCAPD2/SMC4
GO:1904690	BP	GO:1904690	positive regulation of cytoplasmic translational initiation	3	-0.848119233118867	-1.39804783413395	0.0442930153321976	0.510293315400353	0.487469818749117	241	tags=67%, list=8%, signal=62%	MTOR/NCK1
GO:0009894	BP	GO:0009894	regulation of catabolic process	272	-0.335321386712043	-1.33799397150702	0.0441334768568353	0.510293315400353	0.487469818749117	711	tags=25%, list=23%, signal=21%	ELAVL1/EEF1A1/TOM1/SYNCRIP/DDRGK1/NDUFA13/MOV10/FXR1/FOXK1/APOE/WNK1/FBP1/PIP4K2A/UBQLN1/HNRNPAB/SORL1/CNOT2/GTPBP1/CSDE1/HNRNPD/SPTLC1/CDK5/SNX12/RDX/DHX34/CTSA/TAF15/GIT1/PSMC5/SLC4A1/CISD2/UBXN1/CSNK2A1/RASIP1/PLIN5/CNOT1/RBM10/PIN1/CTTN/RPL23/F8A1/CASP3/RBM8A/KEAP1/CDH1/APAF1/MTOR/STK38L/RRAGB/CAV1/UCHL5/IGF2BP2/SLIRP/SLC4A4/HP/ARAF/CARHSP1/BCAP31/SNRNP70/DDA1/HGS/ERCC4/CASC3/AKT2/EIF4G1/MYD8…
GO:0014912	BP	GO:0014912	negative regulation of smooth muscle cell migration	5	0.779488949908712	1.57175134612727	0.0447085073963022	0.510541882742443	0.48770726861087	445	tags=33%, list=14%, signal=29%	TPM1/PRKG1
GO:0001775	BP	GO:0001775	cell activation	217	-0.345310117892719	-1.35451876164547	0.044711014176663	0.510541882742443	0.48770726861087	503	tags=21%, list=16%, signal=19%	LAMP1/FERMT3/CELA2A/CTNNB1/C1QA/CTPS1/FKBP1A/CD22/CHGA/FADD/SLC4A2/VWF/ARID1A/TOP2B/SPTA1/PLSCR1/VPS33B/MSH2/CASP3/IGBP1/BRD2/SMARCD1/MTOR/BPI/BAK1/CD2AP/ERBB2/CD200/CAV1/IKZF1/PRKCB/GBF1/NCK1/MYO18A/FGG/MIF/HBB/FGB/HBB/AP1G1/VAMP8/SUPT6H/MYD88/PRKDC/FGA/ALKBH5
GO:0005123	MF	GO:0005123	death receptor binding	3	-0.8740234375	-1.44074857173759	0.0448220759145836	0.510642145993652	0.487803047464756	391	tags=100%, list=13%, signal=87%	CASP3/MYD88
GO:0007346	BP	GO:0007346	regulation of mitotic cell cycle	95	-0.399900417592202	-1.43192867747894	0.0448484848484848	0.510642145993652	0.487803047464756	766	tags=42%, list=25%, signal=32%	MEPCE/ZW10/SCRIB/CDC73/TPR/PTPN11/RRM2B/ASNS/BUB3/CDK1/SDE2/PDGFRB/BABAM1/CDC27/CTNNB1/RDX/RAD21/XPC/BRCC3/ARID1A/PIN1/TOM1L2/RAD50/RPL26/MSH2/TRIP13/SMARCD1/MKI67/RRM1/PDXP/GBF1/USP47/CRLF3/CAV2/PPP1R9B/RRM2/CDK4/RPS27L/EIF4G1/PRKDC
GO:0001960	BP	GO:0001960	negative regulation of cytokine-mediated signaling pathway	20	0.515042779916226	1.60261874129891	0.045300289104438	0.511768399267488	0.488878927674614	279	tags=25%, list=9%, signal=23%	ARG1/APOA1/ISG15/GIGYF2/SAMHD1
GO:0060761	BP	GO:0060761	negative regulation of response to cytokine stimulus	20	0.515042779916226	1.60261874129891	0.045300289104438	0.511768399267488	0.488878927674614	279	tags=25%, list=9%, signal=23%	ARG1/APOA1/ISG15/GIGYF2/SAMHD1
GO:0030020	MF	GO:0030020	extracellular matrix structural constituent conferring tensile strength	20	0.514654069641287	1.60140922163211	0.045300289104438	0.511768399267488	0.488878927674614	742	tags=68%, list=24%, signal=52%	COL6A3/COL2A1/COL14A1/COL6A3/COL3A1/COL1A1/COL6A5/COL15A1/COL6A1/COL6A5/COL28A1/COL4A1/COL21A1/COL5A1/COL18A1
GO:0086010	BP	GO:0086010	membrane depolarization during action potential	3	0.858723958333333	1.49067882363572	0.0452851910708532	0.511768399267488	0.488878927674614	437	tags=100%, list=14%, signal=86%	SLMAP/YWHAH/ATP1A2
GO:0010522	BP	GO:0010522	regulation of calcium ion transport into cytosol	3	-0.873351915214743	-1.43964162799688	0.0453343226669663	0.511768399267488	0.488878927674614	236	tags=100%, list=8%, signal=92%	BAK1/CAV1
GO:0060402	BP	GO:0060402	calcium ion transport into cytosol	3	-0.873351915214743	-1.43964162799688	0.0453343226669663	0.511768399267488	0.488878927674614	236	tags=100%, list=8%, signal=92%	BAK1/CAV1
GO:1902001	BP	GO:1902001	fatty acid transmembrane transport	7	-0.724287622673906	-1.50870469163083	0.0458135860979463	0.515351806516558	0.492302062623654	193	tags=43%, list=6%, signal=40%	CPT2/ABCD3/AKT2
GO:0006506	BP	GO:0006506	GPI anchor biosynthetic process	4	-0.82781659600529	-1.46695142280844	0.0457467156741506	0.515351806516558	0.492302062623654	139	tags=100%, list=5%, signal=96%	DPM3/PIGT/MPPE1
GO:0051412	BP	GO:0051412	response to corticosterone	3	-0.872873818485168	-1.43885352878725	0.0458465694809337	0.515351806516558	0.492302062623654	125	tags=67%, list=4%, signal=64%	HDAC6/COMT
GO:0140896	BP	GO:0140896	cGAS/STING signaling pathway	4	-0.8276715164463	-1.46669433124189	0.046241269971729	0.5183202238639	0.495137713851312	10	tags=50%, list=0%, signal=50%	PCBP2/PRKDC
GO:0160049	BP	GO:0160049	negative regulation of cGAS/STING signaling pathway	4	-0.8276715164463	-1.46669433124189	0.046241269971729	0.5183202238639	0.495137713851312	10	tags=50%, list=0%, signal=50%	PCBP2/PRKDC
GO:0006959	BP	GO:0006959	humoral immune response	50	0.367404264234284	1.4063083475626	0.0464601227115773	0.520038834751872	0.496779457751881	109	tags=16%, list=4%, signal=16%	S100A12/S100A9/FCN2/PRTN3/AZU1/ELANE/LTF/CLU
GO:0042310	BP	GO:0042310	vasoconstriction	15	-0.585580126287547	-1.49348935485429	0.0466165413533835	0.521054749549931	0.497749934510108	208	tags=27%, list=7%, signal=25%	CAV1/FGG/FGB/FGA
GO:0015643	MF	GO:0015643	toxic substance binding	4	0.828936626839048	1.55431177949045	0.0469357032793326	0.523884305520089	0.500452935106601	120	tags=50%, list=4%, signal=48%	AZU1/ALB
GO:0060333	BP	GO:0060333	type II interferon-mediated signaling pathway	5	0.777315090345363	1.56736800407299	0.0470823500420327	0.524783047659511	0.501311479897575	5	tags=20%, list=0%, signal=20%	ARG1
GO:0045159	MF	GO:0045159	myosin II binding	4	-0.827256529719037	-1.46595894447513	0.0472303787165621	0.525694650062604	0.502182309761099	94	tags=50%, list=3%, signal=49%	NHERF1/LLGL2
GO:0009416	BP	GO:0009416	response to light stimulus	51	-0.441442258100551	-1.45302023827263	0.0472972972972973	0.525702172760996	0.502189495997546	544	tags=35%, list=18%, signal=29%	RIC8A/CDK5/SDE2/MME/GNA11/XPC/FEN1/RDH11/RPL26/MSH2/CASP3/BAK1/POLD1/USP47/COMT/MFAP4/ERCC4/AKT2
GO:0010998	BP	GO:0010998	regulation of translational initiation by eIF2 alpha phosphorylation	4	-0.804490358849125	-1.42561562820112	0.0476973684210526	0.529407434670593	0.505729035507429	162	tags=75%, list=5%, signal=71%	EIF2AK2/NCK1/TMED2
GO:0045123	BP	GO:0045123	cellular extravasation	19	0.518499411577759	1.57656255986133	0.0477956852739137	0.529417472587897	0.505738624466526	78	tags=21%, list=3%, signal=21%	PRTN3/AZU1/ELANE/CD177
GO:0006026	BP	GO:0006026	aminoglycan catabolic process	9	0.640003448724966	1.50058831254548	0.0478569938326615	0.529417472587897	0.505738624466526	509	tags=56%, list=17%, signal=46%	CHI3L1/GLB1/GNS/PGLYRP1/TGFB1
GO:0050714	BP	GO:0050714	positive regulation of protein secretion	32	-0.490237414966232	-1.49063624907919	0.0479651162790698	0.529417472587897	0.505738624466526	229	tags=19%, list=7%, signal=18%	CD2AP/PRKCB/MYO18A/FGG/FGB/FGA
GO:0022627	CC	GO:0022627	cytosolic small ribosomal subunit	32	-0.489257263092595	-1.48765595857536	0.0479651162790698	0.529417472587897	0.505738624466526	1074	tags=53%, list=35%, signal=35%	RPS28/EIF2A/RACK1/RPS13/RPS15A/RPS25/RPS14/RPS10/RPS4X/RPS17/RPS21/RPS23/RPS19/RPS26/RPS5/RPS29/RPS27L
GO:0060669	BP	GO:0060669	embryonic placenta morphogenesis	5	-0.776865212845146	-1.45457058611551	0.0482315112540193	0.531618435155413	0.507841146274045	37	tags=40%, list=1%, signal=40%	GRB2/TMED2
GO:1904019	BP	GO:1904019	epithelial cell apoptotic process	25	-0.523646988518522	-1.50142079819491	0.0485294117647059	0.534160071795709	0.510269105087104	560	tags=32%, list=18%, signal=26%	ITGA4/CASP6/EXOC5/SRSF6/CASP3/FGG/FGB/FGA
GO:0009952	BP	GO:0009952	anterior/posterior pattern specification	8	-0.712950575909126	-1.54629992095428	0.0488958990536278	0.535203668734826	0.511266025868556	488	tags=50%, list=16%, signal=42%	POGLUT1/CTNNB1/TMED2/PRKDC
GO:0009065	BP	GO:0009065	glutamine family amino acid catabolic process	13	0.566783282193541	1.53910990200566	0.0487039983552865	0.535203668734826	0.511266025868556	5	tags=8%, list=0%, signal=8%	ARG1
GO:0030218	BP	GO:0030218	erythrocyte differentiation	30	-0.496407673540105	-1.48308100079449	0.0489614243323442	0.535203668734826	0.511266025868556	288	tags=43%, list=9%, signal=40%	ADAR/UFL1/RPS14/INPP5D/SFXN1/SLC4A1/CASP3/RPS19/ATP5IF1/IKZF1/EPB42/PTBP3/PRKDC
GO:0002369	BP	GO:0002369	T cell cytokine production	3	0.854087439785544	1.48263018361874	0.0489079319385149	0.535203668734826	0.511266025868556	5	tags=33%, list=0%, signal=33%	ARG1
GO:0002724	BP	GO:0002724	regulation of T cell cytokine production	3	0.854087439785544	1.48263018361874	0.0489079319385149	0.535203668734826	0.511266025868556	5	tags=33%, list=0%, signal=33%	ARG1
GO:0045198	BP	GO:0045198	establishment of epithelial cell apical/basal polarity	5	0.77600181697841	1.56471993679431	0.0494561955115897	0.538211790528627	0.514139605712433	469	tags=40%, list=15%, signal=34%	CDC42/SH3BP1
GO:0006896	BP	GO:0006896	Golgi to vacuole transport	9	-0.677713323718852	-1.52641459479302	0.0494590417310665	0.538211790528627	0.514139605712433	613	tags=56%, list=20%, signal=45%	EHD3/ANKFY1/LAMP1/VTI1A/AP1G1
GO:0071007	CC	GO:0071007	U2-type catalytic step 2 spliceosome	21	-0.543409553582171	-1.50193272990851	0.0493468795355588	0.538211790528627	0.514139605712433	640	tags=43%, list=21%, signal=34%	SNRPF/CDC40/CRNKL1/CDC5L/EFTUD2/SNRPD3/SNRPG/RBM22/BCAS2
GO:0002009	BP	GO:0002009	morphogenesis of an epithelium	78	0.329801654944801	1.36216762052945	0.049507888997719	0.538211790528627	0.514139605712433	229	tags=10%, list=7%, signal=10%	RHOB/FLNA/CDC42/CLIC4/TGM2/VCL/ITGA5/TGM3
GO:1901385	BP	GO:1901385	regulation of voltage-gated calcium channel activity	6	0.726621049201694	1.54747940854561	0.0495949132451657	0.538261193104304	0.514186798697102	845	tags=100%, list=27%, signal=73%	NIPSNAP2/FMR1/DMD/CALM3/SRI/AHNAK
GO:0072331	BP	GO:0072331	signal transduction by p53 class mediator	36	-0.472351185741299	-1.46985540627119	0.0497159090909091	0.538261193104304	0.514186798697102	315	tags=31%, list=10%, signal=28%	RRM2B/NDRG1/CASP6/RPL23/RPL26/MSH2/MTOR/MIF/MYO6/RPS27L/TP53RK
GO:0098687	CC	GO:0098687	chromosomal region	117	-0.381866741828839	-1.40045918682075	0.0497041420118343	0.538261193104304	0.514186798697102	849	tags=38%, list=28%, signal=28%	NUP37/XRCC1/THOC6/NUP43/MCM7/NUP107/KDM1A/ZW10/SMC5/CHD4/CDC73/TPR/TRAPPC12/SMC1A/SMC3/WRNIP1/BUB3/CHMP1A/GATAD2B/CDK1/SMCHD1/RAD21/SEC13/FBXO28/HNRNPA2B1/MCM3/FEN1/MCM4/RAD50/MSH2/SMARCD1/NCAPD2/POLD1/IKZF1/DAXX/SMC4/NCAPG/STAG2/DNMT1/HAT1/BAZ1A/ALYREF/ERCC4/PRKDC
GO:0000346	CC	GO:0000346	transcription export complex	5	-0.775830743900704	-1.45263368885978	0.0498392282958199	0.538861193127557	0.514759962980776	82	tags=60%, list=3%, signal=58%	THOC6/DDX39B/ALYREF
GO:0043269	BP	GO:0043269	regulation of monoatomic ion transport	80	0.329902789488713	1.3739097560634	0.0504926395882888	0.545183112615864	0.520799126838319	503	tags=28%, list=16%, signal=24%	FLNA/SLMAP/MYLK/MMP9/WFS1/ATP1B1/STOM/FKBP1A/YWHAH/NIPSNAP2/TCIRG1/YWHAQ/FMR1/SPINK1/FLNA/SNTA1/GPD1L/ATP2B4/DMD/ATP1A2/ACTN2/CLIC2/CALM3
GO:0009057	BP	GO:0009057	macromolecule catabolic process	355	-0.309790068934706	-1.2573256892049	0.0506329113924051	0.545954870665933	0.521536367059641	713	tags=26%, list=23%, signal=22%	RNF40/ELAVL1/EEF1A1/SYNCRIP/TRIM25/DDRGK1/NDUFA13/UBAC2/MOV10/FXR1/CTSZ/UCHL3/ERLIN2/DPP7/APOE/ADRM1/PPP1R8/CHMP1A/UBQLN1/PSMB2/HNRNPAB/LYPLA2/MTPAP/SORL1/CNOT2/TPP1/PSMD12/GTPBP1/CSDE1/HNRNPD/VPS37C/CDK5/SNX12/CELA2A/CDC27/CTNNB1/RDX/DHX34/MME/CTSA/TAF15/PSMA4/NEMF/SEC61B/PSMC5/PSMB8/UBXN1/CSNK2A1/CUL1/DNAJC10/FEN1/CNOT1/RBM10/PIN1/PSMD11/FBXO6/RPL23/EXOG/F8A1/CASP3/RBM8A/KEAP1/XRN2/CDH1/PLAA/AP…
GO:0140673	BP	GO:0140673	transcription elongation-coupled chromatin remodeling	4	-0.800878961204197	-1.41921596801175	0.0509868421052632	0.549025208883811	0.524469380621446	21	tags=75%, list=1%, signal=75%	SUPT5H/SART3/SUPT6H
GO:0032786	BP	GO:0032786	positive regulation of DNA-templated transcription, elongation	10	-0.663552950093795	-1.5317418309252	0.0514018691588785	0.549133738383458	0.524573056005633	710	tags=50%, list=23%, signal=39%	CDC73/CTNNB1/SCAF8/CCNK/SUPT6H
GO:0046425	BP	GO:0046425	regulation of receptor signaling pathway via JAK-STAT	10	-0.662638635109547	-1.52963123145033	0.0514018691588785	0.549133738383458	0.524573056005633	208	tags=30%, list=7%, signal=28%	CAV1/CRLF3/HGS
GO:0033629	BP	GO:0033629	negative regulation of cell adhesion mediated by integrin	5	-0.771811719015055	-1.44510863137635	0.0514469453376206	0.549133738383458	0.524573056005633	637	tags=60%, list=21%, signal=48%	PTPN11/WNK1/SWAP70
GO:0001756	BP	GO:0001756	somitogenesis	5	-0.771107787323032	-1.44379061852558	0.0514469453376206	0.549133738383458	0.524573056005633	37	tags=60%, list=1%, signal=59%	POGLUT1/TMED2/PRKDC
GO:0016558	BP	GO:0016558	protein import into peroxisome matrix	3	-0.869031234945493	-1.43251937742582	0.0514812879734492	0.549133738383458	0.524573056005633	27	tags=67%, list=1%, signal=66%	PEX5/PEX16
GO:0072662	BP	GO:0072662	protein localization to peroxisome	3	-0.869031234945493	-1.43251937742582	0.0514812879734492	0.549133738383458	0.524573056005633	27	tags=67%, list=1%, signal=66%	PEX5/PEX16
GO:0072663	BP	GO:0072663	establishment of protein localization to peroxisome	3	-0.869031234945493	-1.43251937742582	0.0514812879734492	0.549133738383458	0.524573056005633	27	tags=67%, list=1%, signal=66%	PEX5/PEX16
GO:0016887	MF	GO:0016887	ATP hydrolysis activity	132	-0.368637040490704	-1.38023602285358	0.051605504587156	0.549719844837141	0.525132948126736	864	tags=37%, list=28%, signal=28%	ABCB8/CCT4/LONP1/RIGI/MCM7/DHX37/SMC5/DHX30/ENTPD1/CHD4/SPG7/VWA8/DDX21/DDX46/SMC1A/MOV10/KIF5B/DDX42/SMC3/CHD3/WRNIP1/RECQL/SNRNP200/SMCHD1/SRPRA/CCT3/ATAD3A/DHX34/KIF2A/SMC2/DDX17/DHX40/PSMC5/DDX27/DDX47/MCM3/MCM4/DDX23/RAD50/MSH2/TRIP13/RFC4/MTREX/ABCC3/ABCD3/SMC4/DDX39B/ABCB7/DDX10
GO:0005254	MF	GO:0005254	chloride channel activity	8	0.684512065839946	1.57035185206919	0.0518859826070347	0.551631947663407	0.526959529800491	166	tags=33%, list=5%, signal=32%	CLCA1/CLIC4/CLIC1
GO:0031430	CC	GO:0031430	M band	6	0.722619389811867	1.53895710450202	0.051937932685384	0.551631947663407	0.526959529800491	654	tags=57%, list=21%, signal=45%	ALDOA/CRYAB/ENO1/PPP2R5A
GO:0110010	BP	GO:0110010	basolateral protein secretion	3	-0.866274925092032	-1.42797584997076	0.0519935353896457	0.551631947663407	0.526959529800491	31	tags=67%, list=1%, signal=66%	AP1B1/AP1G1
GO:0000077	BP	GO:0000077	DNA damage checkpoint signaling	21	-0.541504255670059	-1.49666666626358	0.0522496371552975	0.552870827285922	0.528142999006951	637	tags=59%, list=21%, signal=47%	PTPN11/CDK1/SDE2/BABAM1/CDC5L/XPC/BRCC3/WDR76/FBXO6/RPL26/MSH2/RPS27L/PRKDC
GO:0031570	BP	GO:0031570	DNA integrity checkpoint signaling	21	-0.541504255670059	-1.49666666626358	0.0522496371552975	0.552870827285922	0.528142999006951	637	tags=59%, list=21%, signal=47%	PTPN11/CDK1/SDE2/BABAM1/CDC5L/XPC/BRCC3/WDR76/FBXO6/RPL26/MSH2/RPS27L/PRKDC
GO:0030595	BP	GO:0030595	leukocyte chemotaxis	49	0.372728383501609	1.41779555378335	0.0524485002543947	0.552911835882736	0.528182173443796	139	tags=12%, list=5%, signal=12%	S100A12/S100A9/AZU1/ANXA1/DDT/BSG
GO:1904062	BP	GO:1904062	regulation of monoatomic cation transmembrane transport	56	0.351348770296894	1.37625035400982	0.0524238714324146	0.552911835882736	0.528182173443796	503	tags=31%, list=16%, signal=26%	FLNA/SLMAP/MMP9/ATP1B1/FKBP1A/YWHAH/NIPSNAP2/TCIRG1/FMR1/FLNA/SNTA1/GPD1L/ATP2B4/DMD/ATP1A2/ACTN2/CLIC2/CALM3
GO:0005794	CC	GO:0005794	Golgi apparatus	312	-0.316853785214566	-1.27596314643216	0.0524625267665953	0.552911835882736	0.528182173443796	588	tags=20%, list=19%, signal=18%	PDXDC1/PRRC1/ARFIP1/GNPTAB/LYPLA2/SORL1/RTN1/TPP1/CSDE1/SDE2/PDGFRB/VTI1A/ACBD3/FAM3C/MME/CHP1/SI/STRN3/VPS51/TBC1D5/PPIL2/EIPR1/RASIP1/COPE/HS2ST1/RSC1A1/TMED5/PLSCR1/CTTN/ARF1/VPS33B/AKAP9/RABGAP1L/TRAPPC8/CDH1/COG5/GBA2/SCAMP2/MTOR/LMAN1/VAPB/CAV1/RRAS2/GBF1/SELENOH/RAB43/MTTP/CAV2/MYO18A/RTN3/AKR7A2/BCAP31/GLG1/ARF5/MPPE1/CUBN/ST6GALNAC1/MYO6/TMED2/AP1G1/YIPF3/ALKBH5
GO:0042953	BP	GO:0042953	lipoprotein transport	8	-0.705891825317576	-1.53099038078337	0.0536277602523659	0.553301261939622	0.528554181940943	585	tags=75%, list=19%, signal=61%	PGRMC1/MIA3/APOB/PRKCB/MTTP/CUBN
GO:0044872	BP	GO:0044872	lipoprotein localization	8	-0.705891825317576	-1.53099038078337	0.0536277602523659	0.553301261939622	0.528554181940943	585	tags=75%, list=19%, signal=61%	PGRMC1/MIA3/APOB/PRKCB/MTTP/CUBN
GO:0043403	BP	GO:0043403	skeletal muscle tissue regeneration	6	0.716941584020685	1.52686512401614	0.0527189396220356	0.553301261939622	0.528554181940943	641	tags=67%, list=21%, signal=53%	CD9/GPX1/COL6A1/DAG1
GO:0005504	MF	GO:0005504	fatty acid binding	16	0.530221211158844	1.52292135622643	0.0536298968093519	0.553301261939622	0.528554181940943	691	tags=56%, list=22%, signal=44%	S100A9/ALB/NME2/FABP1/FABP3/ACOX1/ALOX5AP/FABP2/FABP5
GO:0061982	BP	GO:0061982	meiosis I cell cycle process	10	-0.655578285062856	-1.51333315982551	0.0529595015576324	0.553301261939622	0.528554181940943	466	tags=50%, list=15%, signal=43%	RAD21/TOP2B/RAD50/TRIP13/ERCC4
GO:0042219	BP	GO:0042219	cellular modified amino acid catabolic process	10	-0.655529812411048	-1.5132212658336	0.0529595015576324	0.553301261939622	0.528554181940943	157	tags=20%, list=5%, signal=19%	ABHD12/GGACT
GO:0007127	BP	GO:0007127	meiosis I	9	-0.670482771643111	-1.51012921300908	0.0540958268933539	0.553301261939622	0.528554181940943	466	tags=56%, list=15%, signal=47%	RAD21/TOP2B/RAD50/TRIP13/ERCC4
GO:1903232	BP	GO:1903232	melanosome assembly	7	-0.714554916722652	-1.4884312827374	0.0537124802527646	0.553301261939622	0.528554181940943	31	tags=71%, list=1%, signal=71%	AP3D1/AP1B1/AP3B1/RAB32/AP1G1
GO:0032813	MF	GO:0032813	tumor necrosis factor receptor superfamily binding	7	-0.713034660082297	-1.48526455966498	0.0537124802527646	0.553301261939622	0.528554181940943	391	tags=43%, list=13%, signal=37%	FADD/CASP3/MYD88
GO:0005577	CC	GO:0005577	fibrinogen complex	7	-0.712795942301147	-1.48476730605313	0.0537124802527646	0.553301261939622	0.528554181940943	124	tags=43%, list=4%, signal=41%	FGG/FGB/FGA
GO:0021915	BP	GO:0021915	neural tube development	22	-0.532464872987765	-1.48190793756107	0.0541727672035139	0.553301261939622	0.528554181940943	288	tags=27%, list=9%, signal=25%	CASP3/BRD2/APAF1/PLXNB2/PHGDH/TMED2
GO:0006561	BP	GO:0006561	proline biosynthetic process	3	-0.86513874011377	-1.42610295181446	0.0540526193105767	0.553301261939622	0.528554181940943	397	tags=67%, list=13%, signal=58%	PYCR3/ALDH18A1
GO:0055129	BP	GO:0055129	L-proline biosynthetic process	3	-0.86513874011377	-1.42610295181446	0.0540526193105767	0.553301261939622	0.528554181940943	397	tags=67%, list=13%, signal=58%	PYCR3/ALDH18A1
GO:0016078	BP	GO:0016078	tRNA catabolic process	3	-0.865138348335324	-1.42610230600313	0.0540526193105767	0.553301261939622	0.528554181940943	225	tags=67%, list=7%, signal=62%	ELAC2/TRNT1
GO:0032051	MF	GO:0032051	clathrin light chain binding	3	-0.864853080206603	-1.42563206729856	0.0540526193105767	0.553301261939622	0.528554181940943	140	tags=67%, list=5%, signal=64%	CLTC/HIP1R
GO:0005452	MF	GO:0005452	solute:inorganic anion antiporter activity	3	-0.864583333333333	-1.42518741397953	0.0540526193105767	0.553301261939622	0.528554181940943	420	tags=100%, list=14%, signal=86%	SLC4A2/SLC4A4
GO:0015106	MF	GO:0015106	bicarbonate transmembrane transporter activity	3	-0.864583333333333	-1.42518741397953	0.0540526193105767	0.553301261939622	0.528554181940943	420	tags=100%, list=14%, signal=86%	SLC4A2/SLC4A4
GO:0006390	BP	GO:0006390	mitochondrial transcription	3	-0.863460590953361	-1.42333667473047	0.0540526193105767	0.553301261939622	0.528554181940943	14	tags=67%, list=0%, signal=66%	PRKAA1/MRPL12
GO:0042574	BP	GO:0042574	retinal metabolic process	4	-0.800247827797817	-1.41809755355505	0.0526315789473684	0.553301261939622	0.528554181940943	411	tags=75%, list=13%, signal=65%	ALDH1A3/DHRS4/RDH11
GO:0016485	BP	GO:0016485	protein processing	59	-0.420012754763595	-1.41053733957028	0.0535248041775457	0.553301261939622	0.528554181940943	741	tags=37%, list=24%, signal=29%	PCSK1N/OGT/SPG7/SERPINF2/CTSZ/C1R/CPD/SDE2/SNX12/CASP6/MME/PITRM1/FADD/CASP3/ATG4B/BAK1/METAP2/FGG/GLG1/CLEC3B/FGB/FGA
GO:0016773	MF	GO:0016773	phosphotransferase activity, alcohol group as acceptor	113	-0.385211334622625	-1.40652784540878	0.0530660377358491	0.553301261939622	0.528554181940943	602	tags=24%, list=20%, signal=20%	LTBP4/WNK1/ADPGK/PIP4K2A/CDK1/CDK5/PDGFRB/UCKL1/CSNK2A1/CCNK/KHK/EFEMP1/BRD2/GRK2/MTOR/STK38L/ERBB2/PRKCB/ARAF/PDXK/PPP1R9B/MAP4K1/CDK4/AKT2/TP53RK/PRKDC/RPS6KA5
GO:1905475	BP	GO:1905475	regulation of protein localization to membrane	56	-0.418867866826046	-1.40238511702858	0.0527704485488127	0.553301261939622	0.528554181940943	972	tags=42%, list=32%, signal=29%	GBP1/EZR/RACK1/GDI1/AP2M1/LGALS3/OGT/PDCD5/KIF5B/WNK1/PDZK1/PGRMC1/CDK5/STX7/CHP1/SLC51B/RSC1A1/ERBB2/GRIPAP1/MESD/PPP1R9B/TMED2/VAMP8/AKT2
GO:0005911	CC	GO:0005911	cell-cell junction	141	0.28562658917933	1.29613381055192	0.0531257282704303	0.553301261939622	0.528554181940943	283	tags=17%, list=9%, signal=17%	FLNA/S100A11/DES/CDC42/PDLIM7/LIMD1/SYNM/PGM5/SORBS1/ANXA1/TWF1/ZYX/CLIC4/CNN2/SORBS1/ATP1B1/VCL/ITGA5/ACTN1/YWHAH/NEXN/RAP1B/MAP2K2/PDLIM3/ACTG1
GO:0009892	BP	GO:0009892	negative regulation of metabolic process	575	-0.292723270153243	-1.21150210831173	0.0541368743615935	0.553301261939622	0.528554181940943	711	tags=24%, list=23%, signal=23%	ELAVL1/CDC73/RAN/TPR/SYNCRIP/INPP5D/DDRGK1/DDX21/NDUFA13/MRPL13/MICAL1/ANXA4/SERPINF2/CORO1C/MOV10/FXR1/FOXK1/PTPN11/CTSZ/MAFG/CHD3/ERLIN2/DHRS7B/APOE/SRSF7/WNK1/FBP1/PRMT3/PPP1R8/CHMP1A/ADNP/SRSF3/HNRNPAB/GATAD2B/MTPAP/CDK1/SORL1/RTN1/SMCHD1/CNOT2/CTBP1/SWAP70/GTPBP1/CSDE1/HNRNPD/CDK5/SNX12/CTNNB1/DHX34/SRSF10/RAD21/CTSA/TAF15/DDX17/FKBP1A/SHMT1/GIT1/CHP1/PPM1B/NCOA5/PSMC5/STRN3/SLC4A1/HNF4A/CD2…
GO:0042393	MF	GO:0042393	histone binding	47	-0.442912760386743	-1.44952107658661	0.0543478260869565	0.554237863076749	0.52944889243935	320	tags=19%, list=10%, signal=17%	MCM3AP/BRD2/NCAPD2/DAXX/PRKCB/RNF20/SPIN1/HAT1/SUPT6H
GO:0006302	BP	GO:0006302	double-strand break repair	63	-0.41283636453656	-1.40221295878939	0.0544041450777202	0.554237863076749	0.52944889243935	925	tags=45%, list=30%, signal=32%	MCM6/PSMD14/DEK/FUS/HTATSF1/XRCC1/MCM7/KDM1A/SMC5/CHD4/RECQL/SMCHD1/BABAM1/RAD21/CSNK2A1/MCM3/BRCC3/ARID1A/FEN1/TOP2B/MCM4/RAD50/MSH2/TRIP13/SMARCD1/TDP2/PARP2/ERCC4/PRKDC
GO:0097028	BP	GO:0097028	dendritic cell differentiation	5	0.772964169381107	1.55859486382095	0.05499517720163	0.559523953410606	0.534498555876378	702	tags=100%, list=23%, signal=77%	PRTN3/LGALS9/HMGB1/TRAF6/RBPJ
GO:0034062	MF	GO:0034062	5'-3' RNA polymerase activity	8	-0.70010255145354	-1.51843417559773	0.055205047318612	0.559523953410606	0.534498555876378	196	tags=50%, list=6%, signal=47%	POLR2A/POLR2E/TRNT1/POLR2K
GO:0097747	MF	GO:0097747	RNA polymerase activity	8	-0.70010255145354	-1.51843417559773	0.055205047318612	0.559523953410606	0.534498555876378	196	tags=50%, list=6%, signal=47%	POLR2A/POLR2E/TRNT1/POLR2K
GO:0097017	BP	GO:0097017	renal protein absorption	3	-0.861478182975679	-1.42006885450975	0.055082162178045	0.559523953410606	0.534498555876378	125	tags=67%, list=4%, signal=64%	ADIPOQ/COMT
GO:0046540	CC	GO:0046540	U4/U6 x U5 tri-snRNP complex	20	-0.547500510565081	-1.4864732422604	0.0558823529411765	0.56494567253653	0.539677781940802	927	tags=55%, list=30%, signal=39%	LSM8/LSM3/SART1/SNRPF/SNRNP200/EFTUD2/SNRPD3/DDX23/PRPF4/SNRPG/SNRPN
GO:0097526	CC	GO:0097526	spliceosomal tri-snRNP complex	20	-0.547500510565081	-1.4864732422604	0.0558823529411765	0.56494567253653	0.539677781940802	927	tags=55%, list=30%, signal=39%	LSM8/LSM3/SART1/SNRPF/SNRNP200/EFTUD2/SNRPD3/DDX23/PRPF4/SNRPG/SNRPN
GO:0120114	CC	GO:0120114	Sm-like protein family complex	42	-0.45671650393245	-1.44819173654315	0.0561797752808989	0.567229893930297	0.541859838721084	977	tags=58%, list=32%, signal=40%	STRAP/PRPF8/PRPF6/SF3B2/SART3/SF3B3/SNRPA/GEMIN2/LSM8/HTATSF1/LSM3/SART1/MEPCE/DDX46/GEMIN5/SNRPF/SNRNP200/EFTUD2/SNRPD3/DDX23/PRPF4/SNRPG/SNRNP70/DDX39B/SNRPN
GO:0017134	MF	GO:0017134	fibroblast growth factor binding	5	-0.763977118117848	-1.43043944574337	0.0562700964630225	0.56738399942804	0.542007051660753	247	tags=40%, list=8%, signal=37%	RPS19/GLG1
GO:0032880	BP	GO:0032880	regulation of protein localization	236	-0.335245902037542	-1.32563008648579	0.0563380281690141	0.56738399942804	0.542007051660753	769	tags=29%, list=25%, signal=24%	EPB41L2/MEPCE/SEC24A/KDM1A/TOMM7/OGT/RAN/TPR/TRIM25/DDRGK1/PDCD5/TRAPPC12/UBAC2/PTPN11/KIF5B/APOE/WNK1/PDZK1/PGRMC1/ARFIP1/CDK1/SORL1/SWAP70/CCT3/CDK5/SNX12/CELA2A/STX7/CTNNB1/RDX/FKBP1A/CHP1/GNA11/HNF4A/CHGA/EIPR1/SLC51B/PIN1/RSC1A1/CHP2/GAPVD1/RABGAP1L/CDH1/SLC25A22/MTOR/CD2AP/ATP5IF1/LMAN1/ERBB2/CD200/ASTN2/PRKCB/GRIPAP1/GBF1/UBR5/MESD/MYO18A/FGG/PPP1R9B/BCAP31/ERP29/LLGL2/RBM22/FGB/TMEM231/TM…
GO:0042113	BP	GO:0042113	B cell activation	49	-0.435130080817474	-1.42923215661254	0.0566801619433198	0.570106166263861	0.544607466234126	580	tags=31%, list=19%, signal=25%	PLCG2/ITGA4/SWAP70/SH3KBP1/CTPS1/CD22/TOP2B/MSH2/CASP3/IGBP1/BAK1/PRKCB/MIF/SUPT6H/PRKDC
GO:0070201	BP	GO:0070201	regulation of establishment of protein localization	146	-0.359053680510974	-1.36363763490308	0.0569476082004556	0.572071162884577	0.546484575962267	709	tags=29%, list=23%, signal=23%	RAN/TPR/PDCD5/UBAC2/PTPN11/APOE/PDZK1/PGRMC1/ARFIP1/CDK1/SORL1/CCT3/CDK5/SNX12/CELA2A/CHP1/GNA11/HNF4A/CHGA/EIPR1/SLC51B/RSC1A1/CHP2/GAPVD1/CDH1/SLC25A22/CD2AP/ATP5IF1/LMAN1/ERBB2/CD200/PRKCB/GRIPAP1/UBR5/MYO18A/FGG/BCAP31/ERP29/LLGL2/RBM22/FGB/AKT2/FGA
GO:0051984	BP	GO:0051984	positive regulation of chromosome segregation	9	-0.663874980131409	-1.4952464756483	0.0571870170015456	0.573230549439578	0.547592107526506	740	tags=67%, list=24%, signal=51%	SMC5/CDK1/SMC2/NCAPD2/SMC4/NCAPG
GO:0043462	BP	GO:0043462	regulation of ATP-dependent activity	24	0.458832618253417	1.48888020897129	0.0572074842686675	0.573230549439578	0.547592107526506	236	tags=24%, list=8%, signal=22%	TPM1/VMA21/TPM2/LTF/ATP1B1/ALDOB
GO:0016010	CC	GO:0016010	dystrophin-associated glycoprotein complex	6	0.708028264077953	1.50788249326479	0.0574049853838475	0.574484191685012	0.548789679079405	641	tags=67%, list=21%, signal=53%	PGM5/SNTA1/DMD/DAG1
GO:0032231	BP	GO:0032231	regulation of actin filament bundle assembly	33	0.436766351016248	1.52735309570231	0.0581213418448443	0.575843906218083	0.550088578706313	327	tags=23%, list=11%, signal=21%	FLNA/TPM1/CDC42/APOA1/SYNPO2/ACTG1/CD47/FLNA
GO:0090313	BP	GO:0090313	regulation of protein targeting to membrane	12	-0.613379657754162	-1.47946514575745	0.0576323987538941	0.575843906218083	0.550088578706313	587	tags=50%, list=19%, signal=41%	PDZK1/CDK5/CHP1/SLC51B/ERBB2/AKT2
GO:0017069	MF	GO:0017069	snRNA binding	21	-0.534532013149457	-1.4773960458383	0.058055152394775	0.575843906218083	0.550088578706313	1146	tags=67%, list=37%, signal=42%	SART3/SF3B3/SNRPA/LSM8/LSM3/MEPCE/DDX21/GEMIN5/EFTUD2/SNRPD3/PRPF4/SNRNP70/DDX39B/RBM22
GO:0002238	BP	GO:0002238	response to molecule of fungal origin	3	-0.842184112034188	-1.38826432392249	0.0579216354344123	0.575843906218083	0.550088578706313	20	tags=67%, list=1%, signal=66%	SYK/MYD88
GO:0006231	BP	GO:0006231	dTMP biosynthetic process	3	-0.841840791649513	-1.38769839132543	0.0579216354344123	0.575843906218083	0.550088578706313	450	tags=67%, list=15%, signal=57%	SHMT1/DUT
GO:0009177	BP	GO:0009177	pyrimidine deoxyribonucleoside monophosphate biosynthetic process	3	-0.841840791649513	-1.38769839132543	0.0579216354344123	0.575843906218083	0.550088578706313	450	tags=67%, list=15%, signal=57%	SHMT1/DUT
GO:0022900	BP	GO:0022900	electron transport chain	71	-0.401546799510403	-1.37976853900536	0.0580645161290323	0.575843906218083	0.550088578706313	838	tags=32%, list=27%, signal=24%	CYCS/CYBA/HAAO/UQCRB/AKR1B1/POR/UQCRQ/UQCRC1/CDK1/NDUFA4/FDX2/CIAPIN1/GPX2/SCO2/SLC25A22/NDUFA10/NDUFA9/ETFDH/NDUFB8/NDUFS8/COX5A/AKR7A2/PHGDH
GO:0005759	CC	GO:0005759	mitochondrial matrix	177	-0.350793540193842	-1.35099714692918	0.0581005586592179	0.575843906218083	0.550088578706313	527	tags=22%, list=17%, signal=20%	MRPS27/MMAA/PCCA/ATAD3A/ACSS1/PITRM1/FDX2/ACOT9/MRM1/IDH3G/LRRC59/PARG/SUCLG2/MRPL38/MRPS34/ACAA2/SCO2/ELAC2/NDUFA10/NDUFA9/ETFDH/NDUFB8/MRPL3/MRPS18B/NDUFS8/SLIRP/MRPL37/TRNT1/ACO2/PC/MRPL43/PDP1/MRPL40/ACAD10/MRPL45/MRPL22/PPA2/DARS2/MRPL11/MRPL12
GO:0004693	MF	GO:0004693	cyclin-dependent protein serine/threonine kinase activity	6	-0.741211503397691	-1.45466627082547	0.0583468395461912	0.576638254842558	0.550847399110794	641	tags=83%, list=21%, signal=66%	CDK19/CDK1/CDK5/CCNK/CDK4
GO:0097472	MF	GO:0097472	cyclin-dependent protein kinase activity	6	-0.741211503397691	-1.45466627082547	0.0583468395461912	0.576638254842558	0.550847399110794	641	tags=83%, list=21%, signal=66%	CDK19/CDK1/CDK5/CCNK/CDK4
GO:0016233	BP	GO:0016233	telomere capping	10	-0.644144532085972	-1.48693954991588	0.059190031152648	0.581351593103236	0.555349927516116	536	tags=40%, list=17%, signal=33%	HNRNPD/RAD50/ERCC4/PRKDC
GO:1904036	BP	GO:1904036	negative regulation of epithelial cell apoptotic process	12	-0.611258999465452	-1.47435014074458	0.059190031152648	0.581351593103236	0.555349927516116	313	tags=33%, list=10%, signal=30%	SRSF6/FGG/FGB/FGA
GO:0043621	MF	GO:0043621	protein self-association	12	-0.610379244245849	-1.47222818060497	0.059190031152648	0.581351593103236	0.555349927516116	193	tags=15%, list=6%, signal=14%	ABCD3/MYD88
GO:0015721	BP	GO:0015721	bile acid and bile salt transport	4	-0.818757479391037	-1.45089800702673	0.059143561684613	0.581351593103236	0.555349927516116	352	tags=75%, list=11%, signal=67%	SLC51B/ABCC3/ABCD3
GO:0009211	BP	GO:0009211	pyrimidine deoxyribonucleoside triphosphate metabolic process	4	-0.818755677451184	-1.45089481385781	0.059143561684613	0.581351593103236	0.555349927516116	30	tags=75%, list=1%, signal=74%	CMPK2/DCTPP1/DUT
GO:1903532	BP	GO:1903532	positive regulation of secretion by cell	64	-0.408285794577906	-1.38749337556904	0.0593548387096774	0.582249690976514	0.556207856856544	260	tags=19%, list=8%, signal=18%	GRK2/CD2AP/PRKCB/RAB3D/MYO18A/FGG/MIF/HGS/FGB/AP1G1/VAMP8/FGA
GO:0070528	BP	GO:0070528	protein kinase C signaling	5	0.769994425109636	1.55260671022764	0.0597428836332103	0.582500312444826	0.556447268971196	580	tags=80%, list=19%, signal=65%	AZU1/GPD1L/AKAP12/MYADM
GO:0000307	CC	GO:0000307	cyclin-dependent protein kinase holoenzyme complex	8	-0.693522496885016	-1.5041628667539	0.0599369085173502	0.582500312444826	0.556447268971196	641	tags=62%, list=21%, signal=50%	CDK19/CDK1/CDK5/CCNK/CDK4
GO:0010881	BP	GO:0010881	regulation of cardiac muscle contraction by regulation of the release of sequestered calcium ion	6	0.705564210987306	1.50263481784508	0.0597480105793859	0.582500312444826	0.556447268971196	503	tags=67%, list=16%, signal=56%	DMD/ATP1A2/CLIC2/CALM3
GO:0010770	BP	GO:0010770	positive regulation of cell morphogenesis	6	-0.740017205503286	-1.45232239885864	0.059967585089141	0.582500312444826	0.556447268971196	10	tags=33%, list=0%, signal=33%	CUX1/PRKDC
GO:0002360	BP	GO:0002360	T cell lineage commitment	6	-0.739616562294879	-1.45153611564631	0.059967585089141	0.582500312444826	0.556447268971196	265	tags=50%, list=9%, signal=46%	BRD2/MTOR/PRKDC
GO:0004518	MF	GO:0004518	nuclease activity	37	-0.455376042420885	-1.42394423245015	0.0599144079885877	0.582500312444826	0.556447268971196	357	tags=41%, list=12%, signal=36%	DCPS/NOB1/PPP1R8/CNOT2/FEN1/CNOT1/PLSCR1/RAD50/ENDOD1/EXOG/XRN2/POLD1/ELAC2/TDP2/ERCC4
GO:0005743	CC	GO:0005743	mitochondrial inner membrane	144	-0.35702840553349	-1.3499840951926	0.0596330275229358	0.582500312444826	0.556447268971196	305	tags=31%, list=10%, signal=30%	CKMT1A/LGALS3/PMPCB/UQCRB/SFXN5/SPG7/NDUFA13/MRPL13/UQCRQ/TIMM9/UQCRC1/APOOL/SFXN1/MRPL2/ATP5MF/MRPS27/CDS2/ATAD3A/NDUFA4/ALDH18A1/SLC25A10/MRPL38/EXOG/MRPS34/SCO2/SLC25A22/NDUFA10/NDUFA9/ETFDH/NDUFB8/MRPL3/MRPS18B/NDUFS8/AMBP/MRPL37/COX5A/TIMM8A/MRPL43/MRPL40/MTX1/ABCB7/MRPL45/MRPL22/MRPL11/MRPL12
GO:0101002	CC	GO:0101002	ficolin-1-rich granule	108	0.292381625837945	1.28522888590342	0.0599332702007586	0.582500312444826	0.556447268971196	567	tags=30%, list=18%, signal=25%	MMP9/ALDOC/COTL1/AP2A2/LTA4H/SERPINB10/NME2/VCL/OSTF1/FGL2/SLC2A3/ALDOA/GPI/TCIRG1/HK3/IDH1/COMMD9/CSTB/ACTR2/MAPK14/BIN2/ARPC5/GLB1/GNS/SIRPA/PKM/PSMB7/PSMA5/AGL/PYGL/DIAPH1/COPB1/HMGB1
GO:0050829	BP	GO:0050829	defense response to Gram-negative bacterium	16	0.522105188146808	1.49961020889296	0.0600470015197259	0.582558684670592	0.556503030427314	46	tags=25%, list=1%, signal=25%	FCN2/AZU1/ELANE/LTF
GO:0051539	MF	GO:0051539	4 iron, 4 sulfur cluster binding	17	-0.557048957973208	-1.4672803019112	0.0604719764011799	0.585965329328161	0.559757308709335	414	tags=39%, list=13%, signal=34%	CIAPIN1/PPAT/POLD1/ETFDH/DPH1/NDUFS8/ACO2
GO:0098798	CC	GO:0098798	mitochondrial protein-containing complex	109	-0.380612979789157	-1.38258579562088	0.0607142857142857	0.587595818815331	0.561314872547222	750	tags=31%, list=24%, signal=24%	UQCRB/TOMM7/SPG7/NDUFA13/MRPL13/UQCRQ/TIMM9/UQCRC1/APOOL/PDHA1/MRPL2/ATP5MF/MRPS27/NDUFA4/IDH3G/SUCLG2/MRPL38/MRPS34/NDUFA10/NDUFA9/NDUFB8/MRPL3/MRPS18B/NDUFS8/MRPL37/COX5A/TIMM8A/MRPL43/MRPL40/MTX1/MRPL45/MRPL22/MRPL11/MRPL12
GO:2000736	BP	GO:2000736	regulation of stem cell differentiation	18	-0.544775396302784	-1.45665678901933	0.0611353711790393	0.587808310495519	0.561517860275457	720	tags=50%, list=23%, signal=39%	STAT3/MTA2/EIF2AK2/CHD4/CHD3/GATAD2B/MTCH2/NUDT21/PRKDC
GO:0034728	BP	GO:0034728	nucleosome organization	35	-0.469076818602177	-1.44129939148798	0.0608695652173913	0.587808310495519	0.561517860275457	359	tags=23%, list=12%, signal=20%	ARID1A/MCM3AP/BRD2/SMARCD1/DAXX/HAT1/BAZ1A/SUPT6H
GO:0051321	BP	GO:0051321	meiotic cell cycle	36	-0.462046331109799	-1.43778891263642	0.0610795454545455	0.587808310495519	0.561517860275457	663	tags=44%, list=22%, signal=35%	ZW10/SMC1A/SMC3/BUB3/CDC27/SMC2/RAD21/SEPTIN1/TOP2B/RAD50/TRIP13/NCAPD2/SMC4/STAG2/SPIN1/ERCC4
GO:0030397	BP	GO:0030397	membrane disassembly	3	-0.85418462397977	-1.4080460822872	0.0612594301605532	0.587808310495519	0.561517860275457	189	tags=100%, list=6%, signal=94%	PAFAH1B1/PRKCB
GO:0051081	BP	GO:0051081	nuclear membrane disassembly	3	-0.85418462397977	-1.4080460822872	0.0612594301605532	0.587808310495519	0.561517860275457	189	tags=100%, list=6%, signal=94%	PAFAH1B1/PRKCB
GO:0035869	CC	GO:0035869	ciliary transition zone	3	-0.839403000081958	-1.38367991245124	0.0613287904599659	0.587808310495519	0.561517860275457	106	tags=67%, list=3%, signal=64%	TBCC/TMEM231
GO:0007000	BP	GO:0007000	nucleolus organization	3	-0.839331537290838	-1.38356211250466	0.0613287904599659	0.587808310495519	0.561517860275457	247	tags=100%, list=8%, signal=92%	PHF2/RPS19
GO:0001726	CC	GO:0001726	ruffle	69	0.332942124586184	1.34442522548623	0.0609885264244676	0.587808310495519	0.561517860275457	310	tags=20%, list=10%, signal=18%	TPM1/S100A11/S100A6/PDLIM7/CLIP1/TWF1/CAPG/CFL1/NME2/ITGA5/ACTN1/SH3BGRL3/ACAP2/PALLD
GO:0045785	BP	GO:0045785	positive regulation of cell adhesion	115	0.295510910533959	1.29719147749976	0.0614631391962926	0.588385371123978	0.562069111157005	133	tags=11%, list=4%, signal=11%	FLNA/TPM1/CDC42/OLFM4/AZU1/ELANE/ALOX15/ANXA1/TGM2/APOA1/RRAS/LAMC1/LGALS1
GO:0061053	BP	GO:0061053	somite development	7	-0.703249980604269	-1.46488288894126	0.0616113744075829	0.589093816022383	0.562745869985304	37	tags=43%, list=1%, signal=42%	POGLUT1/TMED2/PRKDC
GO:0022617	BP	GO:0022617	extracellular matrix disassembly	14	0.551158428947123	1.52667650480221	0.0618288974456196	0.5904622504554	0.564053099503898	230	tags=29%, list=7%, signal=27%	ELANE/MMP9/LAMC1/PBXIP1
GO:0015267	MF	GO:0015267	channel activity	33	0.43332175058827	1.51530747654029	0.0629246533497447	0.590584264736348	0.564169656545943	501	tags=32%, list=16%, signal=27%	CLCA1/TOMM40/TMEM109/CLIC4/CLIC1/ATP5F1D/ATP5MG/ANXA6/MCU/ATP5ME/CLIC2
GO:0022803	MF	GO:0022803	passive transmembrane transporter activity	33	0.43332175058827	1.51530747654029	0.0629246533497447	0.590584264736348	0.564169656545943	501	tags=32%, list=16%, signal=27%	CLCA1/TOMM40/TMEM109/CLIC4/CLIC1/ATP5F1D/ATP5MG/ANXA6/MCU/ATP5ME/CLIC2
GO:0099004	BP	GO:0099004	calmodulin dependent kinase signaling pathway	3	0.850751775495557	1.47683972666038	0.0626506024096386	0.590584264736348	0.564169656545943	12	tags=33%, list=0%, signal=33%	PCP4
GO:0000460	BP	GO:0000460	maturation of 5.8S rRNA	10	-0.639706423167732	-1.47669464469873	0.0623052959501558	0.590584264736348	0.564169656545943	234	tags=50%, list=8%, signal=46%	BOP1/RPS21/MTREX/FTSJ3/PRKDC
GO:0051709	BP	GO:0051709	regulation of killing of cells of another organism	3	0.847938427457498	1.47195597059051	0.0626506024096386	0.590584264736348	0.564169656545943	5	tags=33%, list=0%, signal=33%	ARG1
GO:0051712	BP	GO:0051712	positive regulation of killing of cells of another organism	3	0.847938427457498	1.47195597059051	0.0626506024096386	0.590584264736348	0.564169656545943	5	tags=33%, list=0%, signal=33%	ARG1
GO:0031386	MF	GO:0031386	protein tag activity	3	0.847506640815697	1.47120642215063	0.0626506024096386	0.590584264736348	0.564169656545943	187	tags=67%, list=6%, signal=63%	ISG15/SUMO3
GO:0141047	MF	GO:0141047	molecular tag activity	3	0.847506640815697	1.47120642215063	0.0626506024096386	0.590584264736348	0.564169656545943	187	tags=67%, list=6%, signal=63%	ISG15/SUMO3
GO:0030512	BP	GO:0030512	negative regulation of transforming growth factor beta receptor signaling pathway	16	-0.560232258727679	-1.45823610702841	0.0623145400593472	0.590584264736348	0.564169656545943	452	tags=35%, list=15%, signal=30%	FKBP1A/FBN1/PIN1/HTRA1/CAV2/GLG1
GO:0090276	BP	GO:0090276	regulation of peptide hormone secretion	37	-0.454100136427522	-1.41995452106626	0.0627674750356633	0.590584264736348	0.564169656545943	489	tags=27%, list=16%, signal=23%	CELA2A/GNA11/HNF4A/CHGA/EIPR1/SLC25A22/PRKCB/FGG/FGB/FGA
GO:0009221	BP	GO:0009221	pyrimidine deoxyribonucleotide biosynthetic process	4	-0.792461784113263	-1.4043001159146	0.0625	0.590584264736348	0.564169656545943	450	tags=50%, list=15%, signal=43%	SHMT1/DUT
GO:0000014	MF	GO:0000014	single-stranded DNA endodeoxyribonuclease activity	4	-0.7918236708857	-1.40316933270537	0.0625	0.590584264736348	0.564169656545943	306	tags=100%, list=10%, signal=90%	RAD50/EXOG/ERCC4
GO:0048854	BP	GO:0048854	brain morphogenesis	3	-0.837792131526105	-1.38102454135759	0.0630323679727428	0.590584264736348	0.564169656545943	418	tags=67%, list=14%, signal=58%	VPS51/UCHL5
GO:0017081	MF	GO:0017081	chloride channel regulator activity	3	-0.837282582199052	-1.38018459538626	0.0630323679727428	0.590584264736348	0.564169656545943	482	tags=67%, list=16%, signal=56%	STX7/VAMP8
GO:0007588	BP	GO:0007588	excretion	3	-0.837005835118067	-1.37972840285806	0.0630323679727428	0.590584264736348	0.564169656545943	125	tags=100%, list=4%, signal=96%	AGT/COMT
GO:0097254	BP	GO:0097254	renal tubular secretion	3	-0.837005835118067	-1.37972840285806	0.0630323679727428	0.590584264736348	0.564169656545943	125	tags=100%, list=4%, signal=96%	AGT/COMT
GO:1902911	CC	GO:1902911	protein kinase complex	26	-0.494971492493322	-1.43773081790836	0.0631424375917768	0.59091790651927	0.564488375789445	641	tags=31%, list=21%, signal=25%	CDK19/CDK1/CDK5/TBC1D5/CSNK2A1/CCNK/CDK4/PRKDC
GO:0070296	BP	GO:0070296	sarcoplasmic reticulum calcium ion transport	8	0.671910315037716	1.54144194134714	0.063325196797494	0.591646513319393	0.56518439475359	714	tags=75%, list=23%, signal=58%	DMD/ATP2A2/ATP1A2/CLIC2/CALM3/SRI
GO:0048821	BP	GO:0048821	erythrocyte development	9	-0.659453022055638	-1.48528689375993	0.0633693972179289	0.591646513319393	0.56518439475359	420	tags=33%, list=14%, signal=29%	SLC4A1/EPB42/PTBP3
GO:0007431	BP	GO:0007431	salivary gland development	5	0.766119327570888	1.54479301412122	0.0644905956148394	0.594098689554239	0.56752689438795	641	tags=80%, list=21%, signal=63%	CDC42/TGM2/TGFB1/DAG1
GO:0007435	BP	GO:0007435	salivary gland morphogenesis	5	0.766119327570888	1.54479301412122	0.0644905956148394	0.594098689554239	0.56752689438795	641	tags=80%, list=21%, signal=63%	CDC42/TGM2/TGFB1/DAG1
GO:0035272	BP	GO:0035272	exocrine system development	5	0.766119327570888	1.54479301412122	0.0644905956148394	0.594098689554239	0.56752689438795	641	tags=80%, list=21%, signal=63%	CDC42/TGM2/TGFB1/DAG1
GO:0016479	BP	GO:0016479	negative regulation of transcription by RNA polymerase I	4	0.815467866686514	1.52905695073467	0.064488559037184	0.594098689554239	0.56752689438795	327	tags=40%, list=11%, signal=36%	FLNA/FLNA
GO:0007131	BP	GO:0007131	reciprocal meiotic recombination	6	-0.737081705916989	-1.44656132767095	0.0648298217179903	0.594098689554239	0.56752689438795	466	tags=83%, list=15%, signal=71%	RAD21/TOP2B/RAD50/TRIP13/ERCC4
GO:0140527	BP	GO:0140527	reciprocal homologous recombination	6	-0.737081705916989	-1.44656132767095	0.0648298217179903	0.594098689554239	0.56752689438795	466	tags=83%, list=15%, signal=71%	RAD21/TOP2B/RAD50/TRIP13/ERCC4
GO:1904892	BP	GO:1904892	regulation of receptor signaling pathway via STAT	11	-0.613053435532707	-1.4399944949783	0.0644654088050314	0.594098689554239	0.56752689438795	208	tags=27%, list=7%, signal=26%	CAV1/CRLF3/HGS
GO:0030983	MF	GO:0030983	mismatched DNA binding	5	-0.756809755151469	-1.41701956906653	0.0643086816720257	0.594098689554239	0.56752689438795	366	tags=40%, list=12%, signal=35%	XPC/MSH2
GO:0032135	MF	GO:0032135	DNA insertion or deletion binding	5	-0.756809755151469	-1.41701956906653	0.0643086816720257	0.594098689554239	0.56752689438795	366	tags=40%, list=12%, signal=35%	XPC/MSH2
GO:0090160	BP	GO:0090160	Golgi to lysosome transport	5	-0.756134860444534	-1.41575592387661	0.0643086816720257	0.594098689554239	0.56752689438795	613	tags=80%, list=20%, signal=64%	EHD3/ANKFY1/LAMP1/AP1G1
GO:0110104	BP	GO:0110104	mRNA alternative polyadenylation	4	-0.79078596011184	-1.40133043348117	0.0641447368421053	0.594098689554239	0.56752689438795	518	tags=75%, list=17%, signal=62%	CPSF7/VIRMA/NUDT21
GO:0009642	BP	GO:0009642	response to light intensity	3	-0.836454176344883	-1.37881904327403	0.0647359454855196	0.594098689554239	0.56752689438795	339	tags=67%, list=11%, signal=59%	RDH11/AKT2
GO:0036491	BP	GO:0036491	regulation of translation initiation in response to endoplasmic reticulum stress	3	-0.835848427432547	-1.37782052098866	0.0647359454855196	0.594098689554239	0.56752689438795	162	tags=100%, list=5%, signal=95%	NCK1/TMED2
GO:0036492	BP	GO:0036492	eiF2alpha phosphorylation in response to endoplasmic reticulum stress	3	-0.835848427432547	-1.37782052098866	0.0647359454855196	0.594098689554239	0.56752689438795	162	tags=100%, list=5%, signal=95%	NCK1/TMED2
GO:0017121	BP	GO:0017121	plasma membrane phospholipid scrambling	3	-0.835757693707946	-1.37767095465151	0.0647359454855196	0.594098689554239	0.56752689438795	420	tags=67%, list=14%, signal=58%	SLC4A1/PLSCR1
GO:0043123	BP	GO:0043123	positive regulation of canonical NF-kappaB signal transduction	47	0.359699937864529	1.36223576862934	0.0638692962804317	0.594098689554239	0.56752689438795	360	tags=24%, list=12%, signal=22%	S100A12/FLNA/LTF/LGALS1/FKBP1A/TRIM21/IKBKG/UBE2V1/S100A4/FLNA/LGALS9/CC2D1A
GO:0030150	BP	GO:0030150	protein import into mitochondrial matrix	5	0.745471993989077	1.50316000013821	0.0657894736842105	0.596217829008092	0.569551252721281	88	tags=40%, list=3%, signal=39%	TOMM40/TIMM50
GO:2001267	BP	GO:2001267	regulation of cysteine-type endopeptidase activity involved in apoptotic signaling pathway	5	0.745313353535953	1.50284011959882	0.0657894736842105	0.596217829008092	0.569551252721281	335	tags=40%, list=11%, signal=36%	MMP9/LGALS9
GO:1905245	BP	GO:1905245	regulation of aspartic-type peptidase activity	4	0.795465175105167	1.49155056226085	0.065989847715736	0.596217829008092	0.569551252721281	456	tags=50%, list=15%, signal=43%	GRN/PICALM
GO:0036314	BP	GO:0036314	response to sterol	4	0.792575708238359	1.48613261806329	0.065989847715736	0.596217829008092	0.569551252721281	641	tags=100%, list=21%, signal=79%	GPLD1/TGFB1/CES1/DAG1
GO:0070723	BP	GO:0070723	response to cholesterol	4	0.792575708238359	1.48613261806329	0.065989847715736	0.596217829008092	0.569551252721281	641	tags=100%, list=21%, signal=79%	GPLD1/TGFB1/CES1/DAG1
GO:0030478	CC	GO:0030478	actin cap	4	0.792146709686222	1.48532821700128	0.065989847715736	0.596217829008092	0.569551252721281	317	tags=50%, list=10%, signal=45%	CALD1/ACTR2
GO:1902554	CC	GO:1902554	serine/threonine protein kinase complex	24	-0.513733695422766	-1.46089589550736	0.0657894736842105	0.596217829008092	0.569551252721281	641	tags=33%, list=21%, signal=27%	CDK19/CDK1/CDK5/TBC1D5/CSNK2A1/CCNK/CDK4/PRKDC
GO:0016528	CC	GO:0016528	sarcoplasm	23	0.4585941536509	1.45888561366855	0.0654735217886571	0.596217829008092	0.569551252721281	543	tags=33%, list=18%, signal=28%	TMEM109/SLC2A4/FKBP1A/MANF/COL6A1/ATP2A2/REEP5/AGL
GO:0032232	BP	GO:0032232	negative regulation of actin filament bundle assembly	11	-0.61071310598824	-1.43449732056391	0.0660377358490566	0.596217829008092	0.569551252721281	913	tags=45%, list=30%, signal=32%	CLASP2/TJP1/WASF2/STMN1/CGNL1
GO:0051497	BP	GO:0051497	negative regulation of stress fiber assembly	11	-0.61071310598824	-1.43449732056391	0.0660377358490566	0.596217829008092	0.569551252721281	913	tags=45%, list=30%, signal=32%	CLASP2/TJP1/WASF2/STMN1/CGNL1
GO:0070160	CC	GO:0070160	tight junction	28	-0.48609300390324	-1.43287646200712	0.0652818991097923	0.596217829008092	0.569551252721281	939	tags=50%, list=31%, signal=35%	EPPK1/AFDN/TJP1/RIGI/CGN/AOC1/ARHGEF2/TBCD/CTNNB1/SYMPK/POF1B/CGNL1/LSR/CDK4
GO:0070973	BP	GO:0070973	protein localization to endoplasmic reticulum exit site	4	-0.789325209804048	-1.39874187732909	0.0657894736842105	0.596217829008092	0.569551252721281	375	tags=75%, list=12%, signal=66%	MIA3/GBF1/BCAP31
GO:0032259	BP	GO:0032259	methylation	42	-0.435854297173624	-1.38204025050302	0.0660112359550562	0.596217829008092	0.569551252721281	777	tags=45%, list=25%, signal=34%	TRMT1/NOP2/MTA2/PRMT5/AS3MT/MEPCE/ZC3H13/TRMT112/SNRPF/PRMT3/SMCHD1/PRMT9/MRM1/SNRPD3/VIRMA/SNRPG/COMT/DNMT1/FTSJ3
GO:0032970	BP	GO:0032970	regulation of actin filament-based process	118	0.280822095037874	1.24692101173402	0.066116987242115	0.596255012219801	0.569586772868077	472	tags=23%, list=15%, signal=21%	FLNA/TPM1/CDC42/DSTN/ALOX15/TWF1/COTL1/CFL2/CAPG/CNN2/APOA1/SYNPO2/ACTA2/WASHC5/TWF2/ACTG1/CD47/FLNA/TMOD3/ARPC5/SORBS3/ATP2A2/ATP1A2/SVIL/NCKAP1/SH3BP1/ACTN2/KANK2
GO:0006939	BP	GO:0006939	smooth muscle contraction	19	0.495857804588998	1.50771791109894	0.0663566148688698	0.596641652737662	0.569956120412861	445	tags=35%, list=14%, signal=30%	CNN1/MYLK/MYH11/ACTA2/ATP2B4/ATP1A2/PRKG1
GO:0031528	CC	GO:0031528	microvillus membrane	9	-0.652518320048812	-1.46966785546852	0.0664605873261206	0.596641652737662	0.569956120412861	587	tags=78%, list=19%, signal=63%	CDHR2/EZR/PDZK1/CDHR5/CTNNB1/MTTP/CUBN
GO:0043558	BP	GO:0043558	regulation of translational initiation in response to stress	6	-0.736330595158287	-1.44508723359479	0.06645056726094	0.596641652737662	0.569956120412861	162	tags=67%, list=5%, signal=63%	IMPACT/EIF2AK2/NCK1/TMED2
GO:0002791	BP	GO:0002791	regulation of peptide secretion	39	-0.44676022255324	-1.40687463230284	0.0662905500705219	0.596641652737662	0.569956120412861	489	tags=26%, list=16%, signal=22%	CELA2A/GNA11/HNF4A/CHGA/EIPR1/SLC25A22/PRKCB/FGG/FGB/FGA
GO:0072357	CC	GO:0072357	PTW/PP1 phosphatase complex	4	0.813098036116651	1.52461335945052	0.0675412370698203	0.598222385475551	0.571466152933324	534	tags=75%, list=17%, signal=62%	PPP1R12A/PPP1CB/PPP1CA
GO:0032059	CC	GO:0032059	bleb	4	0.812263823189901	1.52304915425477	0.0675412370698203	0.598222385475551	0.571466152933324	17	tags=20%, list=1%, signal=20%	TPM1
GO:1904753	BP	GO:1904753	negative regulation of vascular associated smooth muscle cell migration	4	0.812130266196452	1.52279872593319	0.0675412370698203	0.598222385475551	0.571466152933324	445	tags=40%, list=14%, signal=34%	TPM1/PRKG1
GO:2000515	BP	GO:2000515	negative regulation of CD4-positive, alpha-beta T cell activation	4	0.811077728640835	1.52082514741334	0.0675412370698203	0.598222385475551	0.571466152933324	567	tags=75%, list=18%, signal=61%	ANXA1/LGALS9/HMGB1
GO:0002544	BP	GO:0002544	chronic inflammatory response	4	0.809014003408524	1.51695552417031	0.0675412370698203	0.598222385475551	0.571466152933324	10	tags=25%, list=0%, signal=25%	S100A9
GO:0002902	BP	GO:0002902	regulation of B cell apoptotic process	4	-0.786441668323134	-1.39363203138185	0.0674342105263158	0.598222385475551	0.571466152933324	76	tags=50%, list=2%, signal=49%	NOC2L/MIF
GO:0008278	CC	GO:0008278	cohesin complex	4	-0.785737544773689	-1.39238427306476	0.0674342105263158	0.598222385475551	0.571466152933324	663	tags=100%, list=22%, signal=79%	SMC3/RAD21/STAG2
GO:0030892	CC	GO:0030892	mitotic cohesin complex	4	-0.785737544773689	-1.39238427306476	0.0674342105263158	0.598222385475551	0.571466152933324	663	tags=100%, list=22%, signal=79%	SMC3/RAD21/STAG2
GO:0042254	BP	GO:0042254	ribosome biogenesis	105	-0.378585807849686	-1.3695892446031	0.0673076923076923	0.598222385475551	0.571466152933324	912	tags=37%, list=30%, signal=27%	EBNA1BP2/RPS13/RPL7A/RPS15A/WDR3/EIF5/BOP1/RPS25/SART1/DHX37/RPS14/DHX30/TRMT112/RAN/DDX21/NOB1/RPS4X/RPS17/RPS21/PELP1/SDE2/RPL35/RPS23/DDX17/DDX27/MRM1/TSR1/DDX47/RPL26/XRN2/RPS19/MTREX/RPS5/ZNF593/DDX10/FTSJ3/RPS27L/RPL26L1/PRKDC
GO:0051047	BP	GO:0051047	positive regulation of secretion	68	-0.395409975602065	-1.35136296083089	0.0671834625322997	0.598222385475551	0.571466152933324	260	tags=18%, list=8%, signal=17%	GRK2/CD2AP/PRKCB/RAB3D/MYO18A/FGG/MIF/HGS/FGB/AP1G1/VAMP8/FGA
GO:0003682	MF	GO:0003682	chromatin binding	125	-0.363096560924906	-1.34593962121223	0.06720741599073	0.598222385475551	0.571466152933324	752	tags=31%, list=24%, signal=25%	KDM1A/OGT/DHX30/CHD4/RAN/TPR/SMC1A/SMC3/CHD3/PELP1/ADNP/GATAD2B/CDK1/CTBP1/HNRNPD/CTNNB1/SMC2/RAD21/UBTF/NCOA5/HNF4A/ARID1A/TOP2B/H2AC18/MCM3AP/MSH2/RBMX/BRD2/SMARCD1/POLD1/PRKCB/RNF20/SMC4/STAG2/DNMT1/PARP2/NUDT21/ERCC4/SUPT6H
GO:0005730	CC	GO:0005730	nucleolus	261	-0.323782036344872	-1.28882803851597	0.0668103448275862	0.598222385475551	0.571466152933324	931	tags=36%, list=30%, signal=27%	CPT2/OSBP/EBNA1BP2/RPS13/DEK/MRI1/ADAR/RPL7A/RAE1/ABCB8/NUB1/RPS15A/WDR3/PTPN6/RPL18/XRCC1/BOP1/RPS25/SELENBP1/IFI35/TCOF1/DHX37/RPS14/RBM14/RPS10/GTF3C1/RAN/EEF1A1/DDRGK1/DDX21/RPS4X/RPS17/DDX46/FXR1/CHD3/PDHA1/PELP1/PCDH1/SRP68/MRPS27/HNRNPM/RPL13/RPL35/RPS23/KIF2A/SMC2/UBTF/DDX17/PPM1B/RPL3/DDX27/VPS51/CIAPIN1/TSR1/IDH3G/DDX47/EIF3A/SRSF5/HIRIP3/XPC/FEN1/TOP2B/CHP2/PLSCR1/DDX23/RPL4/SP140/RPL2…
GO:1903306	BP	GO:1903306	negative regulation of regulated secretory pathway	7	0.689415016141521	1.52050939762567	0.0677506775067751	0.599408446704311	0.572599166113705	342	tags=57%, list=11%, signal=51%	RAP1B/FMR1/LGALS9/STXBP3
GO:0051702	BP	GO:0051702	biological process involved in interaction with symbiont	42	0.387160338832101	1.428972018798	0.0679152293050693	0.600195166776202	0.573350699162008	336	tags=26%, list=11%, signal=24%	ARG1/CDC42/AZU1/ELANE/LTF/CFL1/STOM/FMR1/PHB1/GPX1/FN1
GO:1902749	BP	GO:1902749	regulation of cell cycle G2/M phase transition	16	-0.55622799653874	-1.44781335893607	0.0682492581602374	0.60180679195516	0.574890242421087	629	tags=76%, list=20%, signal=61%	RCC2/SIN3A/ZFYVE19/VPS4B/RRM2B/CDK1/BABAM1/RAD21/BRCC3/RAD50/RRM1/USP47/CDK4
GO:0090087	BP	GO:0090087	regulation of peptide transport	40	-0.441462244441438	-1.39264222059866	0.0682451253481894	0.60180679195516	0.574890242421087	489	tags=25%, list=16%, signal=21%	CELA2A/GNA11/HNF4A/CHGA/EIPR1/SLC25A22/PRKCB/FGG/FGB/FGA
GO:0022618	BP	GO:0022618	protein-RNA complex assembly	94	-0.381074574605871	-1.35794619708567	0.0683760683760684	0.602255803143706	0.575319171031538	987	tags=39%, list=32%, signal=27%	XRCC5/GEMIN2/PRMT5/EIF3G/ADAR/HTATSF1/PRKRA/EIF5/BOP1/SART1/RPS14/DHX30/SRSF1/CDC73/DDX46/GEMIN5/SNRPF/DDX42/CRNKL1/SNRNP200/CPSF7/SRSF10/EIF3I/SNRPD3/EIF3A/SRSF5/U2AF2/DDX23/SRSF6/RPS19/SNRPG/RPS5/DDX39B/RPS27L/NUDT21/CELF2/PRKDC
GO:0070106	BP	GO:0070106	interleukin-27-mediated signaling pathway	4	0.790268648557673	1.48180672640695	0.0685279187817259	0.602924127995318	0.57595760423152	138	tags=40%, list=4%, signal=38%	MX1/MX1
GO:0016301	MF	GO:0016301	kinase activity	133	-0.356645026954523	-1.33564668708598	0.0691244239631336	0.60749881347888	0.580327681275851	602	tags=23%, list=20%, signal=20%	LTBP4/WNK1/ADPGK/PIP4K2A/CDK1/SEPHS2/CDK5/PDGFRB/UCKL1/CSNK2A1/ALDH18A1/CCNK/KHK/EFEMP1/BRD2/GRK2/MTOR/STK38L/ERBB2/PRKCB/ARAF/PDXK/PPP1R9B/PRPS1/MAP4K1/PRPS2/CDK4/AKT2/TP53RK/PRKDC/RPS6KA5
GO:0048857	BP	GO:0048857	neural nucleus development	18	0.50422221747946	1.49047078005766	0.0692070833722855	0.607552448719533	0.580378917614346	260	tags=22%, list=8%, signal=20%	CDC42/CKB/YWHAH/YWHAQ
GO:0048662	BP	GO:0048662	negative regulation of smooth muscle cell proliferation	12	0.579857769644556	1.52901033094222	0.0694444444444444	0.608006129094043	0.580812306575671	502	tags=38%, list=16%, signal=32%	TPM1/CNN1/PRKG1/SOD2/PDCD4
GO:0007031	BP	GO:0007031	peroxisome organization	7	-0.698683093994494	-1.4553699785468	0.0695102685624013	0.608006129094043	0.580812306575671	193	tags=86%, list=6%, signal=81%	ABCD1/DNM1L/PEX5/MAVS/ABCD3/PEX16
GO:2000045	BP	GO:2000045	regulation of G1/S transition of mitotic cell cycle	35	-0.456527517456639	-1.40274003534977	0.0695652173913043	0.608006129094043	0.580812306575671	502	tags=31%, list=16%, signal=27%	SDE2/RDX/ARID1A/RPL26/SMARCD1/RRM1/CRLF3/RRM2/RPS27L/EIF4G1/PRKDC
GO:0016755	MF	GO:0016755	aminoacyltransferase activity	59	0.329490896051193	1.30072946135789	0.0694400848473483	0.608006129094043	0.580812306575671	319	tags=22%, list=10%, signal=20%	CUL9/CDC42/HERC6/TGM2/UBE2L3/UBE4A/HDAC7/TGM3/TRIM21/UBE2K/HERC1/PRPF19/GGT1
GO:0097386	CC	GO:0097386	glial cell projection	5	0.761161501562159	1.53479611845773	0.0700295984355505	0.609251961307587	0.58200241740997	719	tags=80%, list=23%, signal=61%	GFAP/FMR1/LCP1/ITGB1
GO:0002474	BP	GO:0002474	antigen processing and presentation of peptide antigen via MHC class I	11	0.589458754737728	1.53002837400623	0.0710382513661202	0.609251961307587	0.58200241740997	671	tags=45%, list=22%, signal=36%	ERAP1/SAR1B/PDIA3/TAP1/TAP2
GO:0006525	BP	GO:0006525	arginine metabolic process	9	0.639056867885876	1.49836890553003	0.0704225352112676	0.609251961307587	0.58200241740997	5	tags=11%, list=0%, signal=11%	ARG1
GO:0001782	BP	GO:0001782	B cell homeostasis	8	-0.680811085905826	-1.47659341880546	0.0709779179810726	0.609251961307587	0.58200241740997	288	tags=38%, list=9%, signal=34%	CASP3/BAK1/MIF
GO:0016832	MF	GO:0016832	aldehyde-lyase activity	4	0.786031311037623	1.47386143432087	0.0710659898477157	0.609251961307587	0.58200241740997	236	tags=60%, list=8%, signal=55%	ALDOC/ALDOA/ALDOB
GO:0006612	BP	GO:0006612	protein targeting to membrane	25	-0.497773973161321	-1.42723669283183	0.0705882352941176	0.609251961307587	0.58200241740997	587	tags=40%, list=19%, signal=33%	PDZK1/SRP68/SRPRA/VPS37C/CDK5/CHP1/SEC61B/SLC51B/ERBB2/AKT2
GO:0034101	BP	GO:0034101	erythrocyte homeostasis	33	-0.463068026395415	-1.41659645971028	0.0711175616835994	0.609251961307587	0.58200241740997	890	tags=42%, list=29%, signal=30%	ADAR/UFL1/RPS14/INPP5D/RPS17/SFXN1/SLC4A1/CASP3/RPS19/ATP5IF1/IKZF1/EPB42/PTBP3/PRKDC
GO:0005923	CC	GO:0005923	bicellular tight junction	27	-0.478647877206666	-1.40786878669155	0.0705882352941176	0.609251961307587	0.58200241740997	939	tags=48%, list=31%, signal=34%	EPPK1/TJP1/RIGI/CGN/AOC1/ARHGEF2/TBCD/CTNNB1/SYMPK/POF1B/CGNL1/LSR/CDK4
GO:0031348	BP	GO:0031348	negative regulation of defense response	60	0.348761362603369	1.38850453562161	0.0710846561112755	0.609251961307587	0.58200241740997	509	tags=33%, list=17%, signal=28%	ARG1/ELANE/APOA1/ISG15/FGL2/GIGYF2/TRIM21/SAMHD1/NFKB1/PSMB4/GPX1/LGALS9/GRN/YWHAZ/MAPK14/SIRPA/PGLYRP1/PTGIS/PROC/TGFB1
GO:0060713	BP	GO:0060713	labyrinthine layer morphogenesis	4	-0.782185471890322	-1.38608974068244	0.0707236842105263	0.609251961307587	0.58200241740997	37	tags=50%, list=1%, signal=49%	GRB2/TMED2
GO:0000082	BP	GO:0000082	G1/S transition of mitotic cell cycle	49	-0.418688494527739	-1.37522797518049	0.0701754385964912	0.609251961307587	0.58200241740997	556	tags=29%, list=18%, signal=24%	CDK1/SDE2/RDX/CUL1/ARID1A/RPL26/SMARCD1/RRM1/CRLF3/RRM2/CDK4/RPS27L/EIF4G1/PRKDC
GO:0030813	BP	GO:0030813	positive regulation of nucleotide catabolic process	3	-0.832409209148084	-1.37215128076164	0.0715502555366269	0.609251961307587	0.58200241740997	241	tags=100%, list=8%, signal=92%	MTOR/SLC4A4
GO:0033123	BP	GO:0033123	positive regulation of purine nucleotide catabolic process	3	-0.832409209148084	-1.37215128076164	0.0715502555366269	0.609251961307587	0.58200241740997	241	tags=100%, list=8%, signal=92%	MTOR/SLC4A4
GO:0045821	BP	GO:0045821	positive regulation of glycolytic process	3	-0.832409209148084	-1.37215128076164	0.0715502555366269	0.609251961307587	0.58200241740997	241	tags=100%, list=8%, signal=92%	MTOR/SLC4A4
GO:0044027	BP	GO:0044027	negative regulation of gene expression via CpG island methylation	3	-0.832299823198455	-1.37197096791883	0.0715502555366269	0.609251961307587	0.58200241740997	119	tags=100%, list=4%, signal=96%	USP7/DNMT1
GO:0170014	CC	GO:0170014	ankyrin-1 complex	3	-0.832134980467783	-1.37169923958915	0.0715502555366269	0.609251961307587	0.58200241740997	420	tags=67%, list=14%, signal=58%	SLC4A1/EPB42
GO:0042816	BP	GO:0042816	vitamin B6 metabolic process	3	-0.831478069115575	-1.37061638064985	0.0715502555366269	0.609251961307587	0.58200241740997	238	tags=67%, list=8%, signal=62%	PDXP/PDXK
GO:0042822	BP	GO:0042822	pyridoxal phosphate metabolic process	3	-0.831478069115575	-1.37061638064985	0.0715502555366269	0.609251961307587	0.58200241740997	238	tags=67%, list=8%, signal=62%	PDXP/PDXK
GO:0032415	BP	GO:0032415	regulation of sodium:proton antiporter activity	3	-0.831349233490857	-1.3704040067771	0.0715502555366269	0.609251961307587	0.58200241740997	447	tags=67%, list=15%, signal=57%	CHP1/CHP2
GO:0032417	BP	GO:0032417	positive regulation of sodium:proton antiporter activity	3	-0.831349233490857	-1.3704040067771	0.0715502555366269	0.609251961307587	0.58200241740997	447	tags=67%, list=15%, signal=57%	CHP1/CHP2
GO:0000408	CC	GO:0000408	EKC/KEOPS complex	3	-0.830286696814949	-1.36865251118493	0.0715502555366269	0.609251961307587	0.58200241740997	23	tags=67%, list=1%, signal=66%	LAGE3/TP53RK
GO:0005047	MF	GO:0005047	signal recognition particle binding	3	-0.829427083333333	-1.36723551612193	0.0715502555366269	0.609251961307587	0.58200241740997	528	tags=100%, list=17%, signal=83%	SRPRA/DERL1
GO:0051126	BP	GO:0051126	negative regulation of actin nucleation	3	-0.82839577761814	-1.36553550194331	0.0715502555366269	0.609251961307587	0.58200241740997	140	tags=100%, list=5%, signal=96%	CORO1A/HIP1R
GO:0006325	BP	GO:0006325	chromatin organization	144	-0.351258591230643	-1.32816746262125	0.0711009174311927	0.609251961307587	0.58200241740997	752	tags=29%, list=24%, signal=23%	KDM1A/SMC5/OGT/ZZEF1/RBM14/CHD4/TRMT112/RNF40/TPR/DDX21/CHD3/GATAD2B/CDK1/SMCHD1/H3C1/BABAM1/RAD21/HIRIP3/BRCC3/ARID1A/H2AC18/DDX23/MCM3AP/BRD2/SMARCD1/MKI67/IKZF1/UCHL5/DAXX/PRKCB/UBR5/RNF20/DNMT1/SPIN1/HAT1/PARP2/BAZ1A/SUPT6H/MYD88/FAM50A/PRKDC/RPS6KA5
GO:0006281	BP	GO:0006281	DNA repair	124	-0.360053885645302	-1.33451554448228	0.0716763005780347	0.609671084016381	0.582402794339714	925	tags=38%, list=30%, signal=28%	MCM6/PSMD14/DEK/FUS/HUWE1/HTATSF1/UFL1/XRCC1/TAF7/MCM7/NME3/KDM1A/SMC5/CHD4/SMC1A/RRM2B/SMC3/WRNIP1/RECQL/CDK1/SMCHD1/BABAM1/CDC5L/RAD21/CSNK2A1/MCM3/XPC/PARG/BRCC3/ARID1A/FEN1/TOP2B/FBXO6/MCM4/RAD50/MSH2/TRIP13/RFC4/SMARCD1/RRM1/POLD1/UCHL5/USP47/UBR5/TDP2/PARP2/ERCC4/PRKDC
GO:0051823	BP	GO:0051823	regulation of synapse structural plasticity	3	0.837907761809451	1.45454350559124	0.072289156626506	0.610955002117095	0.583629287622999	24	tags=33%, list=1%, signal=33%	CDC42
GO:0032036	MF	GO:0032036	myosin heavy chain binding	3	0.836822798164752	1.45266009205203	0.072289156626506	0.610955002117095	0.583629287622999	23	tags=33%, list=1%, signal=33%	MYL9
GO:0043315	BP	GO:0043315	positive regulation of neutrophil degranulation	3	0.836740088191768	1.4525165138928	0.072289156626506	0.610955002117095	0.583629287622999	78	tags=33%, list=3%, signal=33%	CD177
GO:0005212	MF	GO:0005212	structural constituent of eye lens	3	0.834743333167195	1.44905030056285	0.072289156626506	0.610955002117095	0.583629287622999	430	tags=67%, list=14%, signal=57%	HSPB6/CRYAB
GO:0072132	BP	GO:0072132	mesenchyme morphogenesis	3	0.832965251608611	1.44596368757115	0.072289156626506	0.610955002117095	0.583629287622999	176	tags=67%, list=6%, signal=63%	ACTA1/ACTA2
GO:0046689	BP	GO:0046689	response to mercury ion	3	0.83268492957788	1.44547707006042	0.072289156626506	0.610955002117095	0.583629287622999	139	tags=33%, list=5%, signal=32%	BSG
GO:0003205	BP	GO:0003205	cardiac chamber development	15	0.532170444578633	1.50144470130881	0.0727193659751899	0.612633639468266	0.585232845852405	509	tags=35%, list=17%, signal=30%	TPM1/PARVA/FKBP1A/SNX17/AP2B1/TGFB1
GO:0012510	CC	GO:0012510	trans-Golgi network transport vesicle membrane	9	-0.646651176664955	-1.45645328084319	0.0726429675425039	0.612633639468266	0.585232845852405	31	tags=30%, list=1%, signal=30%	CLTA/CLTB/AP1G1
GO:0030130	CC	GO:0030130	clathrin coat of trans-Golgi network vesicle	9	-0.646651176664955	-1.45645328084319	0.0726429675425039	0.612633639468266	0.585232845852405	31	tags=30%, list=1%, signal=30%	CLTA/CLTB/AP1G1
GO:0010269	BP	GO:0010269	response to selenium ion	4	0.804715115565907	1.50889482110068	0.0728834270549994	0.613364662893399	0.585931173355032	489	tags=50%, list=16%, signal=42%	GPX1/SOD2
GO:0043501	BP	GO:0043501	skeletal muscle adaptation	5	0.759545467014995	1.53153756748636	0.073194745078641	0.613877950454137	0.586421503497811	425	tags=40%, list=14%, signal=35%	ACTA1/ATP2A2
GO:0070167	BP	GO:0070167	regulation of biomineral tissue development	13	0.559340445865002	1.51889874996193	0.0732394366197183	0.613877950454137	0.586421503497811	509	tags=38%, list=17%, signal=32%	LTF/AHSG/ISG15/TMEM119/TGFB1
GO:0005849	CC	GO:0005849	mRNA cleavage factor complex	10	-0.627753275316441	-1.44910206663474	0.073208722741433	0.613877950454137	0.586421503497811	518	tags=60%, list=17%, signal=50%	CSTF3/CPSF3/CPSF7/SCAF8/SYMPK/NUDT21
GO:0043125	MF	GO:0043125	ErbB-3 class receptor binding	3	-0.825055577203958	-1.3600294837182	0.0732538330494037	0.613877950454137	0.586421503497811	509	tags=67%, list=17%, signal=56%	CDK5/ERBB2
GO:0060997	BP	GO:0060997	dendritic spine morphogenesis	11	0.586717486667815	1.52291300266937	0.0737704918032787	0.615508311628232	0.587978944761583	106	tags=18%, list=3%, signal=18%	CDC42/CFL1
GO:0005523	MF	GO:0005523	tropomyosin binding	5	0.738199221900967	1.48849527741071	0.0736842105263158	0.615508311628232	0.587978944761583	533	tags=80%, list=17%, signal=66%	S100A6/CALD1/TMOD3/LMOD1
GO:0008514	MF	GO:0008514	organic anion transmembrane transporter activity	25	-0.494735889986916	-1.41852578383261	0.0735294117647059	0.615508311628232	0.587978944761583	737	tags=44%, list=24%, signal=34%	SFXN5/SLC35A3/SFXN1/MFSD10/SLC4A1/SLC4A2/SLC51B/SLC25A10/SLC25A22/ABCC3/SLC4A4
GO:0036293	BP	GO:0036293	response to decreased oxygen levels	68	-0.391640826839052	-1.33848142433338	0.0736434108527132	0.615508311628232	0.587978944761583	288	tags=12%, list=9%, signal=11%	CASP3/ACAA2/APAF1/MTOR/CAV1/COMT/PARP2/ALKBH5
GO:0051130	BP	GO:0051130	positive regulation of cellular component organization	282	0.23778210146956	1.15801263312854	0.0738361785118545	0.615508311628232	0.587978944761583	390	tags=17%, list=13%, signal=16%	FLNA/S100A9/TPM1/CDC42/DSTN/FCN2/AZU1/CLIP1/ALOX15/MMP9/ANXA1/TWF1/CFL2/AHSG/CLU/APOA1/DRG1/SYNPO2/ISG15/NME2/CD300LF/MIEN1/SNX4/PFDN2/MAP1B/WASHC5/TWF2/RAP1B/VPS13D/MAP2K2/PPT1/FMR1/CCT3/DPYSL3/ACTR2/GPX1/CD47/FLNA/FN1/ATL3/SLC25A4/GRN/CD151/IST1/EIF5A/SNX7/FES/MAPK14
GO:0043068	BP	GO:0043068	positive regulation of programmed cell death	120	0.274539358160043	1.22109585568855	0.0743050960776476	0.618767305847021	0.591092176452442	133	tags=7%, list=4%, signal=7%	RHOB/ARG1/S100A9/CDC42/MMP9/TGM2/CLU/UTP11/LGALS1
GO:0032488	BP	GO:0032488	Cdc42 protein signal transduction	5	0.757863737584887	1.52814655021036	0.0747773189115638	0.618803756915714	0.59112699720222	264	tags=60%, list=9%, signal=55%	CDC42/APOA1/APOC3
GO:0000050	BP	GO:0000050	urea cycle	5	0.757554441629214	1.5275228898817	0.0747773189115638	0.618803756915714	0.59112699720222	5	tags=20%, list=0%, signal=20%	ARG1
GO:0019627	BP	GO:0019627	urea metabolic process	5	0.757554441629214	1.5275228898817	0.0747773189115638	0.618803756915714	0.59112699720222	5	tags=20%, list=0%, signal=20%	ARG1
GO:0071941	BP	GO:0071941	nitrogen cycle metabolic process	5	0.757554441629214	1.5275228898817	0.0747773189115638	0.618803756915714	0.59112699720222	5	tags=20%, list=0%, signal=20%	ARG1
GO:0034356	BP	GO:0034356	NAD biosynthesis via nicotinamide riboside salvage pathway	3	0.831247842982378	1.44298239812905	0.0746987951807229	0.618803756915714	0.59112699720222	491	tags=67%, list=16%, signal=56%	PTGIS/NAXD
GO:0060341	BP	GO:0060341	regulation of cellular localization	264	-0.321213897066027	-1.27967039677225	0.0745140388768898	0.618803756915714	0.59112699720222	769	tags=28%, list=25%, signal=23%	EPB41L2/MEPCE/SEC24A/KDM1A/TOMM7/OGT/RAN/TPR/TRIM25/DDRGK1/PDCD5/TRAPPC12/UBAC2/PTPN11/KIF5B/APOE/WNK1/PDZK1/PGRMC1/ARFIP1/CDK1/SORL1/SWAP70/CCT3/CDK5/LAMP1/SNX12/CELA2A/STX7/CTNNB1/RDX/FKBP1A/CHP1/GNA11/HNF4A/CHGA/EIPR1/SLC51B/PIN1/RSC1A1/CHP2/GAPVD1/RABGAP1L/CDH1/SLC25A22/MTOR/BAK1/CD2AP/ATP5IF1/LMAN1/ERBB2/CD200/ASTN2/CAV1/PRKCB/GRIPAP1/GBF1/UBR5/MESD/MYO18A/FGG/PPP1R9B/BCAP31/ERP29/LLGL2/RBM2…
GO:0010389	BP	GO:0010389	regulation of G2/M transition of mitotic cell cycle	15	-0.566459879860533	-1.44472423592518	0.075187969924812	0.620536124960904	0.592781882954216	629	tags=81%, list=20%, signal=65%	RCC2/SIN3A/ZFYVE19/VPS4B/RRM2B/CDK1/BABAM1/RAD21/BRCC3/RAD50/RRM1/USP47/CDK4
GO:0021766	BP	GO:0021766	hippocampus development	17	-0.544164459330164	-1.43334222377939	0.0752212389380531	0.620536124960904	0.592781882954216	840	tags=53%, list=27%, signal=39%	XRCC1/FXR2/RAN/UQCRQ/FXR1/CDK5/CASP3/XRN2/PPP1R9B
GO:0003924	MF	GO:0003924	GTPase activity	83	0.308342332265656	1.28554812733386	0.0751891396475724	0.620536124960904	0.592781882954216	596	tags=32%, list=19%, signal=26%	RHOB/CDC42/MX1/DRG1/RRAS/ARHGDIB/MX1/RAB12/RGS19/TUBB/RAP1B/TUBB6/GNB1/SAR1B/ATL3/RAB18/SEPTIN2/SEPTIN9/EIF2S3/ARL8B/RAB10/RAB27A/TUBA1B/RAB6A/SAR1A/TUFM/ARF4
GO:0005916	CC	GO:0005916	fascia adherens	5	0.755018064917936	1.52240857298125	0.0771511802411685	0.622935583939314	0.595074023176324	186	tags=60%, list=6%, signal=56%	DES/VCL/ACTN1
GO:0098632	MF	GO:0098632	cell-cell adhesion mediator activity	20	0.488196282833707	1.51908257490577	0.0770407296021083	0.622935583939314	0.595074023176324	534	tags=45%, list=17%, signal=37%	S100A11/ANXA1/NEXN/PALLD/CD47/TMOD3/SIRPA/RAB10/PPP1CA
GO:0048668	BP	GO:0048668	collateral sprouting	4	0.802326085939475	1.50441523029762	0.0766992792903926	0.622935583939314	0.595074023176324	445	tags=75%, list=14%, signal=64%	SPP1/IST1/PRKG1
GO:0005915	CC	GO:0005915	zonula adherens	4	0.802319341686641	1.50440258437116	0.0766992792903926	0.622935583939314	0.595074023176324	118	tags=40%, list=4%, signal=39%	SORBS1/SORBS1
GO:0006911	BP	GO:0006911	phagocytosis, engulfment	17	0.506789298361361	1.48590992772112	0.0771604938271605	0.622935583939314	0.595074023176324	638	tags=41%, list=21%, signal=33%	CDC42/ALOX15/BIN2/SH3BP1/MYH9/ELMO1/ARHGAP25
GO:0008252	MF	GO:0008252	nucleotidase activity	5	0.73146672801369	1.47491996459664	0.0763157894736842	0.622935583939314	0.595074023176324	31	tags=20%, list=1%, signal=20%	NT5DC1
GO:0086019	BP	GO:0086019	cell-cell signaling involved in cardiac conduction	4	0.784437946658923	1.47087376922965	0.0761421319796954	0.622935583939314	0.595074023176324	327	tags=40%, list=11%, signal=36%	FLNA/FLNA
GO:0072672	BP	GO:0072672	neutrophil extravasation	4	0.782294689454582	1.46685501820415	0.0761421319796954	0.622935583939314	0.595074023176324	78	tags=50%, list=3%, signal=49%	PRTN3/CD177
GO:0006449	BP	GO:0006449	regulation of translational termination	4	0.781058103681876	1.4645363369315	0.0761421319796954	0.622935583939314	0.595074023176324	461	tags=50%, list=15%, signal=43%	EIF5A/UPF1
GO:0010662	BP	GO:0010662	regulation of striated muscle cell apoptotic process	4	0.779550634972322	1.46170973198173	0.0761421319796954	0.622935583939314	0.595074023176324	681	tags=100%, list=22%, signal=78%	BAG3/ATP2A2/CAPN2/SIRT5
GO:0002054	MF	GO:0002054	nucleobase binding	4	0.773789291347861	1.4509068262212	0.0761421319796954	0.622935583939314	0.595074023176324	548	tags=50%, list=18%, signal=41%	APRT/PYGL
GO:0031338	BP	GO:0031338	regulation of vesicle fusion	3	0.827146828481325	1.43586335199925	0.0771084337349398	0.622935583939314	0.595074023176324	87	tags=33%, list=3%, signal=32%	ANXA1
GO:0045672	BP	GO:0045672	positive regulation of osteoclast differentiation	3	0.826833856163459	1.43532005609828	0.0771084337349398	0.622935583939314	0.595074023176324	51	tags=33%, list=2%, signal=33%	CREB1
GO:0004085	MF	GO:0004085	butyryl-CoA dehydrogenase activity	3	0.826800454212283	1.43526207287701	0.0771084337349398	0.622935583939314	0.595074023176324	244	tags=67%, list=8%, signal=61%	ACADSB/ACADS
GO:0016937	MF	GO:0016937	short-chain fatty acyl-CoA dehydrogenase activity	3	0.826800454212283	1.43526207287701	0.0771084337349398	0.622935583939314	0.595074023176324	244	tags=67%, list=8%, signal=61%	ACADSB/ACADS
GO:0043199	MF	GO:0043199	sulfate binding	3	0.826497395833333	1.4347359868124	0.0771084337349398	0.622935583939314	0.595074023176324	536	tags=100%, list=17%, signal=83%	SULT1A3/GNS/RCC1
GO:0097194	BP	GO:0097194	execution phase of apoptosis	14	-0.568819819862618	-1.43208702429592	0.0768072289156626	0.622935583939314	0.595074023176324	481	tags=50%, list=16%, signal=42%	CASP6/FADD/PLSCR1/EXOG/CASP3/APAF1/SHARPIN
GO:0007224	BP	GO:0007224	smoothened signaling pathway	11	-0.606131626098878	-1.42373593266988	0.0770440251572327	0.622935583939314	0.595074023176324	198	tags=27%, list=6%, signal=26%	UCHL5/TMEM231/TMED2
GO:0009791	BP	GO:0009791	post-embryonic development	14	-0.565217228545841	-1.4230169741703	0.0768072289156626	0.622935583939314	0.595074023176324	243	tags=36%, list=8%, signal=33%	APOB/MTOR/BAK1/CCDC47/TBCE
GO:0080135	BP	GO:0080135	regulation of cellular response to stress	118	-0.360663197072148	-1.32511107102547	0.076741440377804	0.622935583939314	0.595074023176324	392	tags=20%, list=13%, signal=18%	UBXN1/PARG/BRCC3/ARID1A/TOP2B/WDR76/DNAJC7/RPL26/IGBP1/SMARCD1/MTOR/BAK1/CAV1/UCHL5/TXNDC12/USP47/NCK1/BCAP31/ERP29/MIF/ERCC4/TMED2/EIF4G1/PRKDC
GO:0005524	MF	GO:0005524	ATP binding	389	-0.29726360430565	-1.21240495269674	0.0768431983385254	0.622935583939314	0.595074023176324	727	tags=30%, list=24%, signal=26%	ABCB8/MYO1F/CCT4/THRAP3/HSPH1/LONP1/IARS1/SYN2/RIGI/CKMT1A/AACS/MCM7/FARSA/UBE2O/DHX37/NME3/SMC5/DHX30/ENTPD1/CHD4/EHD4/SPG7/VWA8/DDX21/NDUFA13/DDX46/SMC1A/LARS1/MOV10/MYO5B/CDK19/KIF5B/DDX42/ASNS/SMC3/CHD3/EHD3/WNK1/PIP4K2A/WRNIP1/ACSF2/RECQL/SNRNP200/MTPAP/CDK1/SMCHD1/SWAP70/CCT3/SEPHS2/PCCA/CDK5/ATAD3A/MYO1A/ACSS1/PDGFRB/UCKL1/DHX34/KIF2A/SMC2/CTPS1/DDX17/MYO7B/DHX40/PSMC5/DDX27/MYH14/IDH3G/EP…
GO:0002227	BP	GO:0002227	innate immune response in mucosa	4	0.8015617091762	1.50298197259291	0.0774624499333047	0.624103556010869	0.596189756259322	46	tags=25%, list=1%, signal=25%	LTF
GO:2000169	BP	GO:2000169	regulation of peptidyl-cysteine S-nitrosylation	4	0.801541074532296	1.50294328125144	0.0774624499333047	0.624103556010869	0.596189756259322	411	tags=75%, list=13%, signal=65%	SNTA1/ATP2B4/DMD
GO:0006289	BP	GO:0006289	nucleotide-excision repair	17	-0.543002809782512	-1.43028241103834	0.0781710914454277	0.628536759585526	0.600424679347273	366	tags=29%, list=12%, signal=26%	XPC/ARID1A/SMARCD1/POLD1/ERCC4
GO:0005657	CC	GO:0005657	replication fork	19	-0.531305160855309	-1.42770002034633	0.0781710914454277	0.628536759585526	0.600424679347273	470	tags=32%, list=15%, signal=27%	CDC5L/MCM3/RFC4/POLD1/DNMT1/BCAS2
GO:0016445	BP	GO:0016445	somatic diversification of immunoglobulins	14	-0.563341463854538	-1.41829446243417	0.0783132530120482	0.629042485732403	0.600907786269733	320	tags=36%, list=10%, signal=32%	SWAP70/MCM3AP/MSH2/SUPT6H/PRKDC
GO:0034364	CC	GO:0034364	high-density lipoprotein particle	7	0.680965045434362	1.50187293110104	0.0785907859078591	0.629848410979716	0.601677665518346	264	tags=43%, list=9%, signal=39%	CLU/APOA1/APOC3
GO:0050766	BP	GO:0050766	positive regulation of phagocytosis	24	0.44207100482556	1.43448992913861	0.0786163522012579	0.629848410979716	0.601677665518346	522	tags=38%, list=17%, signal=31%	FCN2/AZU1/AHSG/APOA1/CD300LF/CD47/SIRPA/RAB27A/LMAN2
GO:0019866	CC	GO:0019866	organelle inner membrane	159	-0.345594687551903	-1.32312812857713	0.0786516853932584	0.629848410979716	0.601677665518346	807	tags=30%, list=26%, signal=23%	CKMT1A/LGALS3/PMPCB/LEMD2/UQCRB/SFXN5/SPG7/NDUFA13/MRPL13/UQCRQ/TIMM9/UQCRC1/APOOL/SFXN1/MRPL2/ATP5MF/MRPS27/CDS2/ATAD3A/NDUFA4/MFSD10/ALDH18A1/SLC25A10/MRPL38/EXOG/MRPS34/SCO2/SLC25A22/NDUFA10/NDUFA9/ETFDH/NDUFB8/MRPL3/MRPS18B/TRA2B/NDUFS8/AMBP/MRPL37/COX5A/TIMM8A/MRPL43/MRPL40/MTX1/ABCB7/MRPL45/MRPL22/MRPL11/MRPL12
GO:0032839	CC	GO:0032839	dendrite cytoplasm	8	-0.667269464169179	-1.4472233483847	0.0788643533123028	0.630279464135383	0.602089439291043	633	tags=38%, list=21%, signal=30%	KIF5B/ABHD12/HIP1R
GO:1902275	BP	GO:1902275	regulation of chromatin organization	9	-0.637075398538495	-1.43488574339458	0.0788253477588872	0.630279464135383	0.602089439291043	752	tags=44%, list=24%, signal=34%	KDM1A/TPR/MKI67/BAZ1A
GO:0002028	BP	GO:0002028	regulation of sodium ion transport	18	0.498003547840996	1.47208851710761	0.0793650793650794	0.633643128612947	0.605302659734514	437	tags=44%, list=14%, signal=38%	SLMAP/ATP1B1/YWHAH/SNTA1/GPD1L/ATP2B4/DMD/ATP1A2
GO:0051873	BP	GO:0051873	killing by host of symbiont cells	8	0.653148165742695	1.49839934595026	0.0815217391304348	0.634296447268513	0.60592675790904	45	tags=38%, list=1%, signal=37%	ARG1/AZU1/ELANE
GO:0048261	BP	GO:0048261	negative regulation of receptor-mediated endocytosis	7	0.675994125426478	1.49090953400369	0.0813008130081301	0.634296447268513	0.60592675790904	456	tags=43%, list=15%, signal=37%	APOC3/ATXN2/PICALM
GO:0008320	MF	GO:0008320	protein transmembrane transporter activity	6	0.693481486184184	1.4769023292907	0.0805194805194805	0.634296447268513	0.60592675790904	291	tags=50%, list=9%, signal=45%	TOMM40/BLOC1S3/SEC63
GO:0022884	MF	GO:0022884	macromolecule transmembrane transporter activity	6	0.693481486184184	1.4769023292907	0.0805194805194805	0.634296447268513	0.60592675790904	291	tags=50%, list=9%, signal=45%	TOMM40/BLOC1S3/SEC63
GO:0045069	BP	GO:0045069	regulation of viral genome replication	26	0.448099455586891	1.47636771532464	0.0809968847352025	0.634296447268513	0.60592675790904	235	tags=26%, list=8%, signal=24%	MX1/LTF/FAM111A/MX1/ISG15/ZC3HAV1/TOP2A
GO:0036336	BP	GO:0036336	dendritic cell migration	6	0.69316251989509	1.47622302917279	0.0805194805194805	0.634296447268513	0.60592675790904	567	tags=50%, list=18%, signal=41%	CDC42/LGALS9/HMGB1
GO:0031122	BP	GO:0031122	cytoplasmic microtubule organization	16	0.505394308475252	1.4516125901679	0.0811318518460646	0.634296447268513	0.60592675790904	175	tags=19%, list=6%, signal=18%	CLIP1/CLIP2/TBCB
GO:0030660	CC	GO:0030660	Golgi-associated vesicle membrane	20	-0.527796752238891	-1.43297720169303	0.0808823529411765	0.634296447268513	0.60592675790904	37	tags=14%, list=1%, signal=14%	COPE/TMED2/AP1G1
GO:2000191	BP	GO:2000191	regulation of fatty acid transport	7	-0.687129343254788	-1.43130329923151	0.0805687203791469	0.634296447268513	0.60592675790904	402	tags=43%, list=13%, signal=37%	EPRS1/MIF/AKT2
GO:0061045	BP	GO:0061045	negative regulation of wound healing	24	-0.502717465879764	-1.42956922827348	0.0804093567251462	0.634296447268513	0.60592675790904	651	tags=46%, list=21%, signal=36%	EPPK1/CLASP2/SLC12A2/SERPINF2/APOE/PLG/SERPING1/KNG1/FGG/FGB/FGA
GO:0044539	BP	GO:0044539	long-chain fatty acid import into cell	7	-0.685962065788117	-1.42887183839293	0.0805687203791469	0.634296447268513	0.60592675790904	402	tags=29%, list=13%, signal=25%	EPRS1/AKT2
GO:0140354	BP	GO:0140354	lipid import into cell	7	-0.685962065788117	-1.42887183839293	0.0805687203791469	0.634296447268513	0.60592675790904	402	tags=29%, list=13%, signal=25%	EPRS1/AKT2
GO:0010955	BP	GO:0010955	negative regulation of protein processing	7	-0.685960212257311	-1.42886797745352	0.0805687203791469	0.634296447268513	0.60592675790904	651	tags=57%, list=21%, signal=45%	SERPINF2/CTSZ/SNX12/GLG1
GO:1903318	BP	GO:1903318	negative regulation of protein maturation	7	-0.685960212257311	-1.42886797745352	0.0805687203791469	0.634296447268513	0.60592675790904	651	tags=57%, list=21%, signal=45%	SERPINF2/CTSZ/SNX12/GLG1
GO:0048592	BP	GO:0048592	eye morphogenesis	15	-0.55846589246779	-1.42433601826214	0.081203007518797	0.634296447268513	0.60592675790904	480	tags=80%, list=16%, signal=68%	RING1/THY1/NAGLU/STAT3/MAN2A1/COL5A2/CTNNB1/NECTIN1/FBN1/MFAP2/EFEMP1/BAK1
GO:0004111	MF	GO:0004111	creatine kinase activity	3	0.818834782040501	1.42143427791767	0.0819277108433735	0.634296447268513	0.60592675790904	90	tags=67%, list=3%, signal=65%	CKM/CKB
GO:0006599	BP	GO:0006599	phosphagen metabolic process	3	0.818834782040501	1.42143427791767	0.0819277108433735	0.634296447268513	0.60592675790904	90	tags=67%, list=3%, signal=65%	CKM/CKB
GO:0006603	BP	GO:0006603	phosphocreatine metabolic process	3	0.818834782040501	1.42143427791767	0.0819277108433735	0.634296447268513	0.60592675790904	90	tags=67%, list=3%, signal=65%	CKM/CKB
GO:0042396	BP	GO:0042396	phosphagen biosynthetic process	3	0.818834782040501	1.42143427791767	0.0819277108433735	0.634296447268513	0.60592675790904	90	tags=67%, list=3%, signal=65%	CKM/CKB
GO:0046314	BP	GO:0046314	phosphocreatine biosynthetic process	3	0.818834782040501	1.42143427791767	0.0819277108433735	0.634296447268513	0.60592675790904	90	tags=67%, list=3%, signal=65%	CKM/CKB
GO:0022616	BP	GO:0022616	DNA strand elongation	13	-0.579022657558066	-1.42072634687953	0.0819165378670788	0.634296447268513	0.60592675790904	382	tags=69%, list=12%, signal=61%	RFC3/LIG1/POLD2/MCM7/MCM3/MCM4/RAD50/RFC4/UCHL5
GO:0002060	MF	GO:0002060	purine nucleobase binding	3	0.818076151521059	1.42011735361468	0.0819277108433735	0.634296447268513	0.60592675790904	548	tags=67%, list=18%, signal=55%	APRT/PYGL
GO:0010751	BP	GO:0010751	negative regulation of nitric oxide mediated signal transduction	3	0.81789064736858	1.41979533265659	0.0819277108433735	0.634296447268513	0.60592675790904	378	tags=67%, list=12%, signal=59%	SPINK1/ATP2B4
GO:0004529	MF	GO:0004529	DNA exonuclease activity	4	-0.77845834361219	-1.37948499736493	0.0805921052631579	0.634296447268513	0.60592675790904	357	tags=50%, list=12%, signal=44%	FEN1/POLD1
GO:0016895	MF	GO:0016895	DNA exonuclease activity, producing 5'-phosphomonoesters	4	-0.77845834361219	-1.37948499736493	0.0805921052631579	0.634296447268513	0.60592675790904	357	tags=50%, list=12%, signal=44%	FEN1/POLD1
GO:0031838	CC	GO:0031838	haptoglobin-hemoglobin complex	3	-0.820576794125321	-1.35264661496799	0.0800681431005111	0.634296447268513	0.60592675790904	142	tags=75%, list=5%, signal=72%	HP/HBB/HBB
GO:0006892	BP	GO:0006892	post-Golgi vesicle-mediated transport	43	-0.422243670120145	-1.35187603576922	0.0817174515235457	0.634296447268513	0.60592675790904	613	tags=30%, list=20%, signal=24%	EHD3/ANKFY1/SORL1/LAMP1/VTI1A/RABEP1/EXOC2/EXOC5/RSC1A1/SCAMP2/GBF1/MON2/AP1G1
GO:0043009	BP	GO:0043009	chordate embryonic development	98	-0.370295060598836	-1.32619327700151	0.0812121212121212	0.634296447268513	0.60592675790904	634	tags=26%, list=21%, signal=21%	DAD1/MAFG/TAB1/CNOT2/RIC8A/RPL13/PLG/POGLUT1/CTNNB1/CNOT1/MSH2/CASP3/KEAP1/SCO2/BRD2/APAF1/APOB/KIAA1217/PLXNB2/RRM2/PHGDH/TMEM231/TMED2/SUPT6H/PRKDC
GO:0006310	BP	GO:0006310	DNA recombination	59	-0.393563837822708	-1.3217134062178	0.0809399477806789	0.634296447268513	0.60592675790904	1134	tags=53%, list=37%, signal=34%	EXOSC6/HMGB2/TEP1/PPP4C/SFPQ/KPNA2/XRCC5/MCM6/PSMD14/FUS/HTATSF1/XRCC1/MCM7/KDM1A/SMC5/CHD4/RECQL/SMCHD1/SWAP70/RAD21/MCM3/FEN1/TOP2B/MCM4/RAD50/MSH2/TRIP13/UCHL5/ERCC4/SUPT6H/PRKDC
GO:0071824	BP	GO:0071824	protein-DNA complex organization	151	-0.346621923411744	-1.32032147289992	0.082004555808656	0.634296447268513	0.60592675790904	752	tags=29%, list=24%, signal=23%	KDM1A/SMC5/OGT/ZZEF1/RBM14/CHD4/TRMT112/RNF40/TPR/DDX21/TRAPPC12/CHD3/GATAD2B/CDK1/SMCHD1/H3C1/BABAM1/RAD21/UBTF/HIRIP3/BRCC3/ARID1A/H2AC18/DDX23/MCM3AP/RPL23/BRD2/SMARCD1/MKI67/IKZF1/UCHL5/DAXX/PRKCB/UBR5/RNF20/DNMT1/SPIN1/HAT1/PARP2/BAZ1A/SUPT6H/MYD88/FAM50A/PRKDC/RPS6KA5
GO:0005525	MF	GO:0005525	GTP binding	109	0.292060959967445	1.28675383495447	0.0798829027136086	0.634296447268513	0.60592675790904	596	tags=29%, list=19%, signal=24%	RHOB/CDC42/MX1/IRGQ/TGM2/DRG1/RRAS/MX1/RAB12/TUBB/RAP1B/AK4/TUBB6/SAMHD1/RTCB/SAR1B/GMPPB/ATL3/RAB18/ANXA6/SEPTIN2/SEPTIN9/RABL6/EIF2S3/ARL8B/RAB10/RAB27A/TUBA1B/RAB6A/SAR1A/TUFM/ARF4
GO:0006366	BP	GO:0006366	transcription by RNA polymerase II	300	-0.309826847785887	-1.24610648489656	0.080937167199148	0.634296447268513	0.60592675790904	738	tags=27%, list=24%, signal=23%	RPS14/MEPCE/KDM1A/OGT/RALY/RBM14/PCBP1/CHD4/TRMT112/RNF40/CDC73/TPR/DDRGK1/DDX21/ARHGEF2/ANXA4/SERPINF2/FOXK1/ITGA6/MAFG/CHD3/ADRM1/PELP1/WNK1/FBP1/NFYC/ADNP/GATAD2B/CDK1/CNOT2/CTBP1/LMO7/CTNNB1/CDC5L/RAD21/DDX17/NCOA5/PSMC5/HNF4A/FADD/SCAF8/HNRNPA2B1/ARID1A/CNOT1/RBM10/PIN1/CCNK/CHP2/PLSCR1/SP140/RPL23/CRTC2/MEF2D/IGBP1/XRN2/RBMX/BRD2/TRIP13/SMARCD1/CAV1/IKZF1/POLR2E/INTS5/RPAP1/PRKCB/TSTD1/CRLF…
GO:0019838	MF	GO:0019838	growth factor binding	26	-0.478946032600533	-1.3911820814489	0.0822320117474303	0.635436460786374	0.607015782919072	638	tags=42%, list=21%, signal=34%	ITGA6/LTBP4/LTBP2/PDGFRB/SEC61B/IGFALS/RPS19/ERBB2/HTRA1/GLG1/ITGB4
GO:0048813	BP	GO:0048813	dendrite morphogenesis	21	0.475652626712723	1.48591265855613	0.0830670926517572	0.636080602136533	0.607631114254471	569	tags=33%, list=19%, signal=27%	CDC42/CFL1/YWHAH/SARM1/FARP1/PICALM/DOCK10
GO:0009125	BP	GO:0009125	nucleoside monophosphate catabolic process	6	0.687437989489874	1.46403153962622	0.0831168831168831	0.636080602136533	0.607631114254471	841	tags=67%, list=27%, signal=49%	UPP1/DNPH1/NT5E/NT5C
GO:0097225	CC	GO:0097225	sperm midpiece	6	0.686198272775444	1.46139132422079	0.0831168831168831	0.636080602136533	0.607631114254471	923	tags=83%, list=30%, signal=58%	CALM3/AK2/HSPD1/HSP90AA1/VDAC2
GO:0006691	BP	GO:0006691	leukotriene metabolic process	6	0.685221880841128	1.45931190962816	0.0831168831168831	0.636080602136533	0.607631114254471	581	tags=83%, list=19%, signal=68%	LTA4H/GGT1/MGST3/ALOX5AP/MAPKAPK2
GO:0031418	MF	GO:0031418	L-ascorbic acid binding	6	0.684640487502869	1.45807372058834	0.0831168831168831	0.636080602136533	0.607631114254471	3	tags=17%, list=0%, signal=17%	PLOD1
GO:0030574	BP	GO:0030574	collagen catabolic process	6	0.684224323359119	1.45718741892706	0.0831168831168831	0.636080602136533	0.607631114254471	82	tags=33%, list=3%, signal=33%	PRTN3/MMP9
GO:0051016	BP	GO:0051016	barbed-end actin filament capping	15	0.506087414873223	1.42785507012162	0.0830860534124629	0.636080602136533	0.607631114254471	611	tags=47%, list=20%, signal=38%	TWF1/CAPG/TWF2/SVIL/ADD1/FLII/CAPZB
GO:0008091	CC	GO:0008091	spectrin	6	-0.726080863585099	-1.4249716002888	0.0826580226904376	0.636080602136533	0.607631114254471	769	tags=67%, list=25%, signal=50%	EPB41L2/SPTB/SPTA1/PRKCB
GO:0003158	BP	GO:0003158	endothelium development	32	0.407410685182052	1.41084439264453	0.0828025477707006	0.636080602136533	0.607631114254471	324	tags=16%, list=11%, signal=14%	RHOB/CLIC4/VCL/RAP1B/GPX1
GO:0000723	BP	GO:0000723	telomere maintenance	43	-0.421771492640916	-1.35036428920208	0.0831024930747922	0.636080602136533	0.607631114254471	536	tags=23%, list=17%, signal=19%	HNRNPD/CCT3/CTNNB1/HNRNPA2B1/FEN1/RAD50/YLPM1/UCHL5/ERCC4/PRKDC
GO:0035051	BP	GO:0035051	cardiocyte differentiation	27	0.439480647728865	1.4541015047175	0.0838509316770186	0.639847109412327	0.611229159856162	509	tags=36%, list=17%, signal=30%	CDC42/LMNA/MYH11/SORBS2/COL14A1/PRKG1/ACTN2/ACADM/PDCD4/TGFB1
GO:0008253	MF	GO:0008253	5'-nucleotidase activity	4	0.768263390366183	1.44054539120913	0.083756345177665	0.639847109412327	0.611229159856162	31	tags=25%, list=1%, signal=25%	NT5DC1
GO:0010811	BP	GO:0010811	positive regulation of cell-substrate adhesion	44	0.378961423653698	1.39960686176745	0.083772309153579	0.639847109412327	0.611229159856162	382	tags=24%, list=12%, signal=22%	FLNA/CDC42/OLFM4/ALOX15/APOA1/RRAS/ITGA5/FLNA/FN1/P4HB/RSU1
GO:0045778	BP	GO:0045778	positive regulation of ossification	5	0.723203362223597	1.45825782165588	0.0842105263157895	0.641357712900293	0.612672199743727	323	tags=60%, list=11%, signal=54%	LTF/ISG15/TMEM119
GO:0044057	BP	GO:0044057	regulation of system process	85	0.296381645377635	1.23779467094618	0.0841619675475438	0.641357712900293	0.612672199743727	447	tags=25%, list=15%, signal=22%	FLNA/TPM1/DES/MYL9/CNN1/LMNA/TWF1/ATP1B1/SPP1/FMR1/SPINK1/FLNA/SNTA1/CC2D1A/GPD1L/ATP2B4/DMD/PPP1R12B/ATP2A2/ATP1A2/PRKG1/HSPB7
GO:0001836	BP	GO:0001836	release of cytochrome c from mitochondria	11	0.580387090887468	1.50648151346885	0.087431693989071	0.641956666929392	0.613244364816623	109	tags=36%, list=4%, signal=35%	LMNA/MMP9/TIMM50/CLU
GO:0017080	MF	GO:0017080	sodium channel regulator activity	8	0.644654220253923	1.47891322774239	0.0869565217391304	0.641956666929392	0.613244364816623	378	tags=75%, list=12%, signal=66%	GLRX/GPLD1/YWHAH/SNTA1/GPD1L/ATP2B4
GO:0050765	BP	GO:0050765	negative regulation of phagocytosis	13	0.543356543752738	1.47549418460766	0.0845070422535211	0.641956666929392	0.613244364816623	567	tags=46%, list=18%, signal=38%	PRTN3/CNN2/CD300LF/CD47/SIRPA/HMGB1
GO:0002701	BP	GO:0002701	negative regulation of production of molecular mediator of immune response	7	0.668895386212195	1.47525321751233	0.0867208672086721	0.641956666929392	0.613244364816623	114	tags=29%, list=4%, signal=28%	ARG1/APOA1
GO:0070942	BP	GO:0070942	neutrophil mediated cytotoxicity	6	0.683248916102117	1.45511010139433	0.0857142857142857	0.641956666929392	0.613244364816623	45	tags=50%, list=1%, signal=49%	ARG1/AZU1/ELANE
GO:0070943	BP	GO:0070943	neutrophil-mediated killing of symbiont cell	6	0.683248916102117	1.45511010139433	0.0857142857142857	0.641956666929392	0.613244364816623	45	tags=50%, list=1%, signal=49%	ARG1/AZU1/ELANE
GO:0017075	MF	GO:0017075	syntaxin-1 binding	5	0.721476533261041	1.45477586627121	0.0868421052631579	0.641956666929392	0.613244364816623	342	tags=40%, list=11%, signal=36%	VAMP3/STXBP3
GO:0032682	BP	GO:0032682	negative regulation of chemokine production	5	0.721271780050172	1.45436300456887	0.0868421052631579	0.641956666929392	0.613244364816623	429	tags=60%, list=14%, signal=52%	ELANE/LGALS9/SIRPA
GO:0062237	BP	GO:0062237	protein localization to postsynapse	8	-0.662310824215473	-1.4364686834366	0.0851735015772871	0.641956666929392	0.613244364816623	738	tags=50%, list=24%, signal=38%	OGT/SCRIB/ERBB2/GRIPAP1
GO:1903539	BP	GO:1903539	protein localization to postsynaptic membrane	8	-0.662310824215473	-1.4364686834366	0.0851735015772871	0.641956666929392	0.613244364816623	738	tags=50%, list=24%, signal=38%	OGT/SCRIB/ERBB2/GRIPAP1
GO:0006497	BP	GO:0006497	protein lipidation	8	-0.662045205081325	-1.43589258901994	0.0851735015772871	0.641956666929392	0.613244364816623	444	tags=50%, list=14%, signal=43%	PPM1B/ATG4B/PIGT/MPPE1
GO:0035145	CC	GO:0035145	exon-exon junction complex	10	-0.620848744934096	-1.43316368823097	0.0856697819314642	0.641956666929392	0.613244364816623	852	tags=70%, list=28%, signal=51%	THRAP3/CCDC9/SRSF1/RBM8A/PNN/ALYREF/CASC3
GO:0051291	BP	GO:0051291	protein heterooligomerization	10	-0.620731952556825	-1.43289408537595	0.0856697819314642	0.641956666929392	0.613244364816623	518	tags=60%, list=17%, signal=50%	FARSA/CPSF7/RRM1/CD2AP/RRM2/NUDT21
GO:0005796	CC	GO:0005796	Golgi lumen	23	0.44780581159893	1.42456560132287	0.0870967741935484	0.641956666929392	0.613244364816623	866	tags=65%, list=28%, signal=47%	FMOD/SOD3/BGN/PROC/TGFB1/CSPG4/PRELP/AGRN/DAG1/ERO1A/F2/VCAN/LUM/MMP14/DCN
GO:0007204	BP	GO:0007204	positive regulation of cytosolic calcium ion concentration	12	-0.588941366299517	-1.42052024927786	0.0872274143302181	0.641956666929392	0.613244364816623	236	tags=42%, list=8%, signal=39%	SWAP70/BAK1/CAV1/KNG1/BCAP31
GO:0043247	BP	GO:0043247	telomere maintenance in response to DNA damage	7	-0.681799234350312	-1.42020058249393	0.0853080568720379	0.641956666929392	0.613244364816623	198	tags=43%, list=6%, signal=40%	XRCC1/UCHL5/ERCC4
GO:0031648	BP	GO:0031648	protein destabilization	13	-0.578485354477708	-1.41940798630666	0.0850077279752705	0.641956666929392	0.613244364816623	241	tags=38%, list=8%, signal=36%	GGA3/CDC73/MTOR/DERL1/PRKDC
GO:0034243	BP	GO:0034243	regulation of transcription elongation by RNA polymerase II	13	-0.577280348535862	-1.4164513080707	0.0850077279752705	0.641956666929392	0.613244364816623	710	tags=46%, list=23%, signal=36%	INTS11/CDC73/CTNNB1/CCNK/INTS5/SUPT6H
GO:0033013	BP	GO:0033013	tetrapyrrole metabolic process	15	-0.554548385206871	-1.41434463513778	0.0857142857142857	0.641956666929392	0.613244364816623	585	tags=47%, list=19%, signal=38%	PGRMC1/MMAA/SPTA1/ATP5IF1/AMBP/CUBN/ABCB7
GO:0019372	BP	GO:0019372	lipoxygenase pathway	3	0.814453125	1.41382805789863	0.0867469879518072	0.641956666929392	0.613244364816623	573	tags=100%, list=19%, signal=81%	ALOX15/GPX1/ALOX5AP
GO:0005388	MF	GO:0005388	P-type calcium transporter activity	3	0.814012479229543	1.41306313069196	0.0867469879518072	0.641956666929392	0.613244364816623	425	tags=67%, list=14%, signal=58%	ATP2B4/ATP2A2
GO:0046902	BP	GO:0046902	regulation of mitochondrial membrane permeability	11	-0.601266162879806	-1.41230749944546	0.0864779874213836	0.641956666929392	0.613244364816623	275	tags=55%, list=9%, signal=50%	RHOT1/SPG7/ACAA2/BAK1/ATP5IF1/HIP1R
GO:0001731	BP	GO:0001731	formation of translation preinitiation complex	3	0.8134765625	1.41213282041913	0.0867469879518072	0.641956666929392	0.613244364816623	576	tags=100%, list=19%, signal=81%	EIF2S3/RPL13A/DENR
GO:0060330	BP	GO:0060330	regulation of response to type II interferon	3	0.813271387272309	1.41177665198563	0.0867469879518072	0.641956666929392	0.613244364816623	5	tags=33%, list=0%, signal=33%	ARG1
GO:0060334	BP	GO:0060334	regulation of type II interferon-mediated signaling pathway	3	0.813271387272309	1.41177665198563	0.0867469879518072	0.641956666929392	0.613244364816623	5	tags=33%, list=0%, signal=33%	ARG1
GO:0019199	MF	GO:0019199	transmembrane receptor protein kinase activity	5	-0.742420454177224	-1.39007763164183	0.0852090032154341	0.641956666929392	0.613244364816623	602	tags=80%, list=20%, signal=64%	LTBP4/PDGFRB/EFEMP1/ERBB2
GO:1902415	BP	GO:1902415	regulation of mRNA binding	4	-0.774677574349343	-1.37278519830774	0.0871710526315789	0.641956666929392	0.613244364816623	25	tags=50%, list=1%, signal=50%	EIF3E/EIF4G1
GO:1902416	BP	GO:1902416	positive regulation of mRNA binding	4	-0.774677574349343	-1.37278519830774	0.0871710526315789	0.641956666929392	0.613244364816623	25	tags=50%, list=1%, signal=50%	EIF3E/EIF4G1
GO:1905216	BP	GO:1905216	positive regulation of RNA binding	4	-0.774677574349343	-1.37278519830774	0.0871710526315789	0.641956666929392	0.613244364816623	25	tags=50%, list=1%, signal=50%	EIF3E/EIF4G1
GO:0046078	BP	GO:0046078	dUMP metabolic process	4	-0.774649292251303	-1.37273508036596	0.0871710526315789	0.641956666929392	0.613244364816623	30	tags=50%, list=1%, signal=50%	DPYD/DUT
GO:0034446	BP	GO:0034446	substrate adhesion-dependent cell spreading	41	0.370640139475375	1.35438494844719	0.0873144063939879	0.641956666929392	0.613244364816623	132	tags=16%, list=4%, signal=16%	FLNA/CDC42/OLFM4/POSTN/PARVA/APOA1/LAMC1
GO:0019418	BP	GO:0019418	sulfide oxidation	3	-0.819804986401976	-1.35137435975451	0.0851788756388416	0.641956666929392	0.613244364816623	305	tags=67%, list=10%, signal=60%	SLC25A10/TSTD1
GO:0070221	BP	GO:0070221	sulfide oxidation, using sulfide:quinone oxidoreductase	3	-0.819804986401976	-1.35137435975451	0.0851788756388416	0.641956666929392	0.613244364816623	305	tags=67%, list=10%, signal=60%	SLC25A10/TSTD1
GO:0090150	BP	GO:0090150	establishment of protein localization to membrane	80	-0.379332936544325	-1.32261266612295	0.0860349127182045	0.641956666929392	0.613244364816623	742	tags=35%, list=24%, signal=27%	TOMM7/SCRIB/GGA3/NDUFA13/TIMM9/PDCD5/NCLN/WNK1/PDZK1/SORL1/SRP68/SRPRA/VPS37C/CDK5/RDX/CHP1/SEC61B/MTCH2/SLC51B/RSC1A1/ERBB2/GRIPAP1/CCDC47/TIMM8A/SYNE3/MTX1/PEX16/AKT2
GO:0048193	BP	GO:0048193	Golgi vesicle transport	114	-0.360729517611949	-1.31635362611955	0.0853080568720379	0.641956666929392	0.613244364816623	767	tags=31%, list=25%, signal=24%	PREB/SEC24A/PITPNB/ZW10/GGA3/TRAPPC12/SNX2/EHD3/ANKFY1/SORL1/LAMP1/VTI1A/SNX12/RABEP1/MIA2/EXOC2/SEC13/VPS51/MIA3/EXOC5/COPE/RSC1A1/TMED5/TRAPPC8/COG5/SCAMP2/LMAN1/VAPB/GBF1/MYO18A/BCAP31/ARF5/MPPE1/MON2/TMED2/AP1G1
GO:0009792	BP	GO:0009792	embryo development ending in birth or egg hatching	99	-0.366529128632959	-1.31534354359575	0.0869565217391304	0.641956666929392	0.613244364816623	634	tags=25%, list=21%, signal=21%	DAD1/MAFG/TAB1/CNOT2/RIC8A/RPL13/PLG/POGLUT1/CTNNB1/CNOT1/MSH2/CASP3/KEAP1/SCO2/BRD2/APAF1/APOB/KIAA1217/PLXNB2/RRM2/PHGDH/TMEM231/TMED2/SUPT6H/PRKDC
GO:1990234	CC	GO:1990234	transferase complex	141	-0.342683408347249	-1.29491169958068	0.0854214123006834	0.641956666929392	0.613244364816623	740	tags=30%, list=24%, signal=24%	SMC5/OGT/ZC3H13/RNF40/CDC73/CDK19/SNRPF/DAD1/DCAF7/PELP1/CDK1/SPTLC1/LMO7/CDK5/CDC27/SNRPD3/TBC1D5/CSNK2A1/MCM3/CUL1/VIRMA/BRCC3/FBXO6/CCNK/KEAP1/F13A1/PRPSAP2/POLD1/SHARPIN/POLR2E/RPAP1/DERL1/USP47/SNRPG/RNF20/POLR2K/DCUN1D4/PRPS1/PRPS2/DDA1/ILVBL/CDK4/PRKDC
GO:0050727	BP	GO:0050727	regulation of inflammatory response	82	0.308671733643898	1.28208053421973	0.0871242708235633	0.641956666929392	0.613244364816623	509	tags=29%, list=17%, signal=25%	S100A12/S100A9/ELANE/ALOX15/MMP9/ANXA1/AHSG/APOA1/DDT/LGALS1/SNX4/NFKB1/PSMB4/GGT1/GPX1/CD47/GRN/MAPK14/SIRPA/PGLYRP1/PTGIS/PROC/PDCD4/TGFB1
GO:0140657	MF	GO:0140657	ATP-dependent activity	178	-0.332625767026901	-1.27966487272575	0.0874439461883408	0.641956666929392	0.613244364816623	864	tags=34%, list=28%, signal=26%	ABCB8/MYO1F/CCT4/HSPH1/LONP1/RIGI/MCM7/DHX37/SMC5/DHX30/ENTPD1/CHD4/SPG7/VWA8/DDX21/DDX46/SMC1A/MOV10/MYO5B/KIF5B/DDX42/SMC3/CHD3/WRNIP1/ACSF2/RECQL/SNRNP200/SMCHD1/SRPRA/CCT3/ATAD3A/MYO1A/ACSS1/DHX34/KIF2A/SMC2/DDX17/MYO7B/DHX40/PSMC5/DDX27/MYH14/DDX47/MCM3/TOP2B/MCM4/DDX23/RAD50/MSH2/TRIP13/RFC4/MTREX/ABCC3/ABCD3/SMC4/MYO18A/DDX39B/ABCB7/DDX10/MYO6/MYD88
GO:0022011	BP	GO:0022011	myelination in peripheral nervous system	8	-0.657270383770974	-1.42553660353616	0.0883280757097792	0.646652775676022	0.61773043431912	49	tags=38%, list=2%, signal=37%	NDRG1/ITGB4/AKT2
GO:0032292	BP	GO:0032292	peripheral nervous system axon ensheathment	8	-0.657270383770974	-1.42553660353616	0.0883280757097792	0.646652775676022	0.61773043431912	49	tags=38%, list=2%, signal=37%	NDRG1/ITGB4/AKT2
GO:2000622	BP	GO:2000622	regulation of nuclear-transcribed mRNA catabolic process, nonsense-mediated decay	8	-0.657169260040676	-1.42531727891332	0.0883280757097792	0.646652775676022	0.61773043431912	566	tags=50%, list=18%, signal=41%	HNRNPAB/DHX34/RBM8A/CASC3
GO:2001026	BP	GO:2001026	regulation of endothelial cell chemotaxis	4	0.762663165091097	1.43004459316132	0.0888324873096447	0.64793680215367	0.618957031132047	105	tags=25%, list=3%, signal=24%	HSPB1
GO:0016447	BP	GO:0016447	somatic recombination of immunoglobulin gene segments	12	-0.585700879139428	-1.41270422905609	0.088785046728972	0.64793680215367	0.618957031132047	291	tags=33%, list=9%, signal=30%	SWAP70/MSH2/SUPT6H/PRKDC
GO:0044209	BP	GO:0044209	AMP salvage	3	0.8125	1.41043758293964	0.0891566265060241	0.64793680215367	0.618957031132047	579	tags=100%, list=19%, signal=81%	APRT/ADSL/ADK
GO:0090036	BP	GO:0090036	regulation of protein kinase C signaling	3	0.812174479166667	1.40987250377981	0.0891566265060241	0.64793680215367	0.618957031132047	580	tags=100%, list=19%, signal=81%	GPD1L/AKAP12/MYADM
GO:0004165	MF	GO:0004165	delta(3)-delta(2)-enoyl-CoA isomerase activity	3	0.810481984170732	1.40693446248602	0.0891566265060241	0.64793680215367	0.618957031132047	6	tags=33%, list=0%, signal=33%	ECI1
GO:0005638	CC	GO:0005638	lamin filament	3	0.809690728187846	1.4055609028848	0.0891566265060241	0.64793680215367	0.618957031132047	33	tags=33%, list=1%, signal=33%	LMNA
GO:0050909	BP	GO:0050909	sensory perception of taste	3	0.809387833356545	1.40503510072635	0.0891566265060241	0.64793680215367	0.618957031132047	289	tags=67%, list=9%, signal=60%	PIGR/GNB1
GO:0009055	MF	GO:0009055	electron transfer activity	55	-0.398652235399655	-1.32868593328411	0.0888594164456233	0.64793680215367	0.618957031132047	478	tags=31%, list=16%, signal=27%	CYCS/CYBA/HAAO/AKR1B1/UQCRC1/NDUFA4/FDX2/CIAPIN1/GPX2/NDUFA10/NDUFA9/ETFDH/NDUFB8/NDUFS8/COX5A/AKR7A2/PHGDH
GO:0071826	BP	GO:0071826	protein-RNA complex organization	99	-0.363894508272431	-1.30588882196429	0.0893719806763285	0.648907629137551	0.619884436684083	987	tags=56%, list=32%, signal=39%	VCP/DNAJC17/FAF2/DHX9/STRAP/PRPF8/PRPF6/SF3B2/EIF3B/EIF3E/EIF6/RPL5/HSP90AB1/SART3/SF3B3/RPL38/RPS28/NOP2/XRCC5/GEMIN2/PRMT5/EIF3G/ADAR/HTATSF1/PRKRA/EIF5/BOP1/SART1/RPS14/DHX30/SRSF1/CDC73/DDX46/GEMIN5/SNRPF/KIF5B/DDX42/CRNKL1/SNRNP200/CPSF7/SRSF10/EIF3I/SNRPD3/EIF3A/SRSF5/U2AF2/DDX23/SRSF6/RPS19/SNRPG/RPS5/DDX39B/RPS27L/NUDT21/CELF2/PRKDC
GO:0006974	BP	GO:0006974	DNA damage response	176	-0.3305675016278	-1.27287787091341	0.089585666293393	0.649864577426295	0.620798584282707	925	tags=36%, list=30%, signal=26%	MCM6/GNL1/PSMD14/DEK/FUS/HUWE1/HTATSF1/UFL1/XRCC1/TAF7/BCLAF1/MCM7/NME3/KDM1A/SMC5/CHD4/SMC1A/PTPN11/RRM2B/SMC3/NDRG1/WRNIP1/RECQL/CDK1/SMCHD1/SDE2/BABAM1/CDC5L/RAD21/CSNK2A1/MCM3/XPC/PARG/BRCC3/ARID1A/FEN1/TOP2B/WDR76/FBXO6/CCNK/MCM4/RAD50/RPL26/MSH2/CASP3/TRIP13/RFC4/SMARCD1/RRM1/MTOR/BAK1/MTREX/POLD1/UCHL5/USP47/UBR5/TDP2/MIF/PARP2/MYO6/RPS27L/ERCC4/PRKDC
GO:0035794	BP	GO:0035794	positive regulation of mitochondrial membrane permeability	10	-0.615679328425501	-1.42123063675924	0.0903426791277259	0.651781365052393	0.622629641222853	275	tags=60%, list=9%, signal=55%	RHOT1/SPG7/ACAA2/BAK1/ATP5IF1/HIP1R
GO:1902686	BP	GO:1902686	mitochondrial outer membrane permeabilization involved in programmed cell death	10	-0.615679328425501	-1.42123063675924	0.0903426791277259	0.651781365052393	0.622629641222853	275	tags=60%, list=9%, signal=55%	RHOT1/SPG7/ACAA2/BAK1/ATP5IF1/HIP1R
GO:1905710	BP	GO:1905710	positive regulation of membrane permeability	10	-0.615679328425501	-1.42123063675924	0.0903426791277259	0.651781365052393	0.622629641222853	275	tags=60%, list=9%, signal=55%	RHOT1/SPG7/ACAA2/BAK1/ATP5IF1/HIP1R
GO:0015293	MF	GO:0015293	symporter activity	7	-0.672714370023612	-1.4012766398454	0.0900473933649289	0.651781365052393	0.622629641222853	255	tags=57%, list=8%, signal=53%	SLC12A2/SLC25A22/SLC4A4/SLC12A9
GO:0008494	MF	GO:0008494	translation activator activity	3	-0.81736009761743	-1.34734418176012	0.0902896081771721	0.651781365052393	0.622629641222853	46	tags=67%, list=1%, signal=66%	PABPC1/RPS27L
GO:0044772	BP	GO:0044772	mitotic cell cycle phase transition	90	-0.365937093531005	-1.29601292786676	0.0902348578491965	0.651781365052393	0.622629641222853	1007	tags=45%, list=33%, signal=31%	CPSF3/CUL5/MAD1L1/ZFYVE19/VPS4B/GPNMB/DNM2/CLASP2/IQGAP3/PTPN6/MEPCE/ZW10/SMC5/CDC73/TPR/RPL24/RRM2B/BUB3/CDK1/SDE2/BABAM1/CDC27/RDX/RAD21/CUL1/XPC/BRCC3/ARID1A/RAD50/RPL26/TRIP13/SMARCD1/RRM1/USP47/CRLF3/PPP1R9B/RRM2/CDK4/RPS27L/EIF4G1/PRKDC
GO:0097305	BP	GO:0097305	response to alcohol	60	-0.387265900133566	-1.30107364263679	0.09043250327654	0.651836826523725	0.622682622111612	272	tags=27%, list=9%, signal=25%	H6PD/FBP1/CDK1/HNRNPD/CTNNB1/CDH1/BAK1/AKAP8/PRKCB/RPL15/COMT/PPP1R9B/MAP4K1/CDK4/EIF4G1/MYD88
GO:0033674	BP	GO:0033674	positive regulation of kinase activity	56	0.334879539059596	1.31173956804223	0.0905775384130382	0.652289786611498	0.623115323001911	378	tags=18%, list=12%, signal=16%	S100A12/AZU1/ELANE/LTF/CHI3L1/CACUL1/MAP2K2/PHB1/LCP2/ATP2B4
GO:0051239	BP	GO:0051239	regulation of multicellular organismal process	520	0.211977812801242	1.10244423035541	0.0907363090525562	0.652840751261184	0.623641645079458	365	tags=15%, list=12%, signal=16%	RHOB/ARG1/FLNA/S100A9/TPM1/DES/MYL9/CNN1/LOXL2/LMNA/AZU1/ELANE/LTF/CREB1/POSTN/MMP9/ANXA1/TWF1/CHI3L1/LCN2/AHSG/HSPB1/CFL1/TGM2/CLU/APOA1/DDT/RRAS/ARHGDIB/LGALS1/GFAP/ISG15/ATP1B1/GLIPR2/NME2/VCL/BLOC1S3/CD300LF/PDCD6/FGL2/SNX4/ACTA2/ZC3HAV1/ITGA5/SPP1/HDAC7/HSPB6/MAP1B/COL14A1/ALDH1A1/CD9/SERPINB1/TWF2/GPLD1/YWHAH/TRIM21/GPI/MAP2K2/APOC3/FMR1/LAMA4/SPINK1/NFKB1/ERAP1/COL1A1/STAT6/PHB1/TMEM119/CD…
GO:0005179	MF	GO:0005179	hormone activity	9	-0.629189308357735	-1.41712389228959	0.0911901081916538	0.655511502363192	0.626192943551002	389	tags=33%, list=13%, signal=29%	FBN1/PYY/KNG1
GO:0060314	BP	GO:0060314	regulation of ryanodine-sensitive calcium-release channel activity	7	0.665586996809598	1.46795654270851	0.0921409214092141	0.656868851815065	0.627489583877878	714	tags=62%, list=23%, signal=48%	FKBP1A/DMD/CLIC2/CALM3/SRI
GO:0003151	BP	GO:0003151	outflow tract morphogenesis	6	0.677241980161874	1.44231717489407	0.0935064935064935	0.656868851815065	0.627489583877878	98	tags=33%, list=3%, signal=32%	CDC42/PARVA
GO:0022417	BP	GO:0022417	protein maturation by protein folding	6	0.676577544773013	1.44090213182079	0.0935064935064935	0.656868851815065	0.627489583877878	680	tags=57%, list=22%, signal=45%	WFS1/FKBP1A/AIP/ERO1A
GO:1901550	BP	GO:1901550	regulation of endothelial cell development	7	0.652467659815525	1.43902175782124	0.0948509485094851	0.656868851815065	0.627489583877878	506	tags=43%, list=16%, signal=36%	VCL/PROC/ADD1
GO:1903140	BP	GO:1903140	regulation of establishment of endothelial barrier	7	0.652467659815525	1.43902175782124	0.0948509485094851	0.656868851815065	0.627489583877878	506	tags=43%, list=16%, signal=36%	VCL/PROC/ADD1
GO:0010880	BP	GO:0010880	regulation of release of sequestered calcium ion into cytosol by sarcoplasmic reticulum	7	0.65124711939906	1.43632984782513	0.0948509485094851	0.656868851815065	0.627489583877878	714	tags=71%, list=23%, signal=55%	DMD/ATP1A2/CLIC2/CALM3/SRI
GO:0014808	BP	GO:0014808	release of sequestered calcium ion into cytosol by sarcoplasmic reticulum	7	0.65124711939906	1.43632984782513	0.0948509485094851	0.656868851815065	0.627489583877878	714	tags=71%, list=23%, signal=55%	DMD/ATP1A2/CLIC2/CALM3/SRI
GO:1903514	BP	GO:1903514	release of sequestered calcium ion into cytosol by endoplasmic reticulum	7	0.65124711939906	1.43632984782513	0.0948509485094851	0.656868851815065	0.627489583877878	714	tags=71%, list=23%, signal=55%	DMD/ATP1A2/CLIC2/CALM3/SRI
GO:2001257	BP	GO:2001257	regulation of cation channel activity	19	0.471773817063916	1.43448752322122	0.0925925925925926	0.656868851815065	0.627489583877878	503	tags=45%, list=16%, signal=38%	SLMAP/MMP9/FKBP1A/NIPSNAP2/FMR1/DMD/ACTN2/CLIC2/CALM3
GO:0030388	BP	GO:0030388	fructose 1,6-bisphosphate metabolic process	7	0.649676448870224	1.43286572354041	0.0948509485094851	0.656868851815065	0.627489583877878	236	tags=38%, list=8%, signal=35%	ALDOC/ALDOA/ALDOB
GO:0007035	BP	GO:0007035	vacuolar acidification	13	0.526011172759055	1.42839252672704	0.0929577464788732	0.656868851815065	0.627489583877878	361	tags=31%, list=12%, signal=27%	CLIC4/TCIRG1/PPT1/GRN
GO:0120034	BP	GO:0120034	positive regulation of plasma membrane bounded cell projection assembly	31	0.4138471807758	1.42325919855485	0.0928792569659443	0.656868851815065	0.627489583877878	452	tags=26%, list=15%, signal=22%	CDC42/MIEN1/TWF2/FMR1/DPYSL3/ACTR2/SEPTIN9/NCKAP1
GO:0031214	BP	GO:0031214	biomineral tissue development	25	0.435177529857615	1.42261138859287	0.093167701863354	0.656868851815065	0.627489583877878	394	tags=40%, list=13%, signal=35%	LTF/ALOX15/AHSG/ISG15/SPP1/TCIRG1/COL1A1/TMEM119/SBDS/COL6A1
GO:1903053	BP	GO:1903053	regulation of extracellular matrix organization	16	0.495286387681136	1.42258023891443	0.0930494063223233	0.656868851815065	0.627489583877878	701	tags=41%, list=23%, signal=32%	LAMC1/COL6A1/LAMB1/TGFB1/NID1/DAG1/LAMB2
GO:0030834	BP	GO:0030834	regulation of actin filament depolymerization	29	0.42090589381961	1.41917597773855	0.0948012232415902	0.656868851815065	0.627489583877878	667	tags=48%, list=22%, signal=38%	DSTN/TWF1/CFL2/CAPG/TWF2/TMOD3/SVIL/SH3BP1/ACTN2/ADD1/LMOD1/FLII/CAPZB/WDR1
GO:0046794	BP	GO:0046794	transport of virus	9	-0.627831521678464	-1.41406574759725	0.0927357032457496	0.656868851815065	0.627489583877878	208	tags=33%, list=7%, signal=31%	CAV1/CAV2/SIGLEC1
GO:0005847	CC	GO:0005847	mRNA cleavage and polyadenylation specificity factor complex	8	-0.651874489207321	-1.41383358846164	0.0930599369085174	0.656868851815065	0.627489583877878	518	tags=50%, list=17%, signal=42%	CPSF3/CPSF7/SYMPK/NUDT21
GO:0043371	BP	GO:0043371	negative regulation of CD4-positive, alpha-beta T cell differentiation	3	0.808856787257424	1.40411324549376	0.091566265060241	0.656868851815065	0.627489583877878	567	tags=67%, list=18%, signal=54%	ANXA1/HMGB1
GO:0002507	BP	GO:0002507	tolerance induction	3	0.80859375	1.40365663302166	0.091566265060241	0.656868851815065	0.627489583877878	591	tags=100%, list=19%, signal=81%	LGALS9/HMGB1/CD3E
GO:0005229	MF	GO:0005229	intracellular calcium activated chloride channel activity	3	0.807923954152339	1.4024939188845	0.0939759036144578	0.656868851815065	0.627489583877878	11	tags=25%, list=0%, signal=25%	CLCA1
GO:0061778	MF	GO:0061778	intracellular chloride channel activity	3	0.807923954152339	1.4024939188845	0.0939759036144578	0.656868851815065	0.627489583877878	11	tags=25%, list=0%, signal=25%	CLCA1
GO:0005744	CC	GO:0005744	TIM23 mitochondrial import inner membrane translocase complex	3	0.807823445883953	1.40231944425173	0.0939759036144578	0.656868851815065	0.627489583877878	88	tags=33%, list=3%, signal=32%	TIMM50
GO:0031571	BP	GO:0031571	mitotic G1 DNA damage checkpoint signaling	6	-0.713957586781992	-1.4011790366595	0.0923824959481361	0.656868851815065	0.627489583877878	502	tags=67%, list=16%, signal=56%	SDE2/RPL26/RPS27L/PRKDC
GO:0044819	BP	GO:0044819	mitotic G1/S transition checkpoint signaling	6	-0.713957586781992	-1.4011790366595	0.0923824959481361	0.656868851815065	0.627489583877878	502	tags=67%, list=16%, signal=56%	SDE2/RPL26/RPS27L/PRKDC
GO:0001502	BP	GO:0001502	cartilage condensation	3	0.804897573490654	1.3972403545454	0.0939759036144578	0.656868851815065	0.627489583877878	390	tags=67%, list=13%, signal=58%	COL2A1/MAPK14
GO:0047429	MF	GO:0047429	nucleoside triphosphate diphosphatase activity	5	-0.740314358784987	-1.38613426494392	0.0916398713826367	0.656868851815065	0.627489583877878	30	tags=80%, list=1%, signal=79%	ASMTL/DHX9/DCTPP1/DUT
GO:0000109	CC	GO:0000109	nucleotide-excision repair complex	5	-0.739585647162525	-1.38476985516695	0.0932475884244373	0.656868851815065	0.627489583877878	366	tags=80%, list=12%, signal=71%	XRCC1/XPC/POLD1/ERCC4
GO:0001054	MF	GO:0001054	RNA polymerase I activity	5	-0.738394689402813	-1.38253995466691	0.0948553054662379	0.656868851815065	0.627489583877878	196	tags=40%, list=6%, signal=38%	POLR2E/POLR2K
GO:0001056	MF	GO:0001056	RNA polymerase III activity	5	-0.738394689402813	-1.38253995466691	0.0948553054662379	0.656868851815065	0.627489583877878	196	tags=40%, list=6%, signal=38%	POLR2E/POLR2K
GO:0005666	CC	GO:0005666	RNA polymerase III complex	5	-0.738394689402813	-1.38253995466691	0.0948553054662379	0.656868851815065	0.627489583877878	196	tags=40%, list=6%, signal=38%	POLR2E/POLR2K
GO:0005736	CC	GO:0005736	RNA polymerase I complex	5	-0.738394689402813	-1.38253995466691	0.0948553054662379	0.656868851815065	0.627489583877878	196	tags=40%, list=6%, signal=38%	POLR2E/POLR2K
GO:0034085	BP	GO:0034085	establishment of sister chromatid cohesion	5	-0.738315416341849	-1.38239152703643	0.0948553054662379	0.656868851815065	0.627489583877878	663	tags=80%, list=22%, signal=63%	SMC1A/SMC3/RAD21/STAG2
GO:0034087	BP	GO:0034087	establishment of mitotic sister chromatid cohesion	5	-0.738315416341849	-1.38239152703643	0.0948553054662379	0.656868851815065	0.627489583877878	663	tags=80%, list=22%, signal=63%	SMC1A/SMC3/RAD21/STAG2
GO:0035150	BP	GO:0035150	regulation of tube size	30	-0.45689498133585	-1.36503181214987	0.0934718100890208	0.656868851815065	0.627489583877878	208	tags=23%, list=7%, signal=21%	CAV1/KNG1/FGG/HBB/FGB/HBB/FGA
GO:0035296	BP	GO:0035296	regulation of tube diameter	30	-0.45689498133585	-1.36503181214987	0.0934718100890208	0.656868851815065	0.627489583877878	208	tags=23%, list=7%, signal=21%	CAV1/KNG1/FGG/HBB/FGB/HBB/FGA
GO:0097746	BP	GO:0097746	blood vessel diameter maintenance	30	-0.45689498133585	-1.36503181214987	0.0934718100890208	0.656868851815065	0.627489583877878	208	tags=23%, list=7%, signal=21%	CAV1/KNG1/FGG/HBB/FGB/HBB/FGA
GO:0008094	MF	GO:0008094	ATP-dependent activity, acting on DNA	36	-0.438383819315862	-1.36415625977944	0.09375	0.656868851815065	0.627489583877878	803	tags=39%, list=26%, signal=29%	MCM7/DHX30/CHD4/CHD3/WRNIP1/RECQL/MCM3/TOP2B/MCM4/RAD50/MSH2/RFC4/MYO18A/MYD88
GO:0043045	BP	GO:0043045	post-fertilization epigenetic regulation of gene expression	3	-0.816405768081295	-1.34577105584935	0.0919931856899489	0.656868851815065	0.627489583877878	119	tags=67%, list=4%, signal=64%	DDB1/DNMT1
GO:0016072	BP	GO:0016072	rRNA metabolic process	83	-0.366376026963711	-1.28899802732168	0.0940594059405941	0.656868851815065	0.627489583877878	809	tags=39%, list=26%, signal=29%	RPL7A/WDR3/BOP1/RPS25/SART1/TCOF1/DHX37/RPS14/GTF3C1/TRMT112/DDX21/NOB1/RPS17/RPS21/PELP1/SDE2/RPL35/DDX17/DDX27/MRM1/TSR1/DDX47/RPL26/XRN2/RPS19/MTOR/MTREX/POLR2E/SPIN1/DDX10/FTSJ3/PRKDC
GO:0002181	BP	GO:0002181	cytoplasmic translation	111	-0.352515459790012	-1.28555243909349	0.0933806146572104	0.656868851815065	0.627489583877878	960	tags=40%, list=31%, signal=28%	RPL28/RACK1/EIF3G/RPS13/RPL8/RPL7A/RPS15A/RPL18/EIF5/RPS25/RPS14/RPS10/SYNCRIP/RPS4X/RPS17/DRG2/RPS21/RPL24/CSDE1/HNRNPD/RPL22L1/RPL31/RPL13/RPL35/RPS23/EIF2B3/EIF3I/NEMF/RPL3/EIF3A/RPL4/RPL23/RPL26/RPL19/RPS19/RPS26/MTOR/RPL15/NCK1/RPS5/RPS29/RPL32/EIF4G1/RPL26L1
GO:0044770	BP	GO:0044770	cell cycle phase transition	110	-0.35199256374191	-1.28253432058205	0.0923076923076923	0.656868851815065	0.627489583877878	766	tags=35%, list=25%, signal=27%	MEPCE/ZW10/SMC5/CDC73/TPR/DDRGK1/RPL24/PTPN11/RRM2B/PLCG2/BUB3/CDK1/SDE2/BABAM1/CDC27/RDX/CDC5L/RAD21/CUL1/XPC/BRCC3/ARID1A/WDR76/FBXO6/RAD50/RPL26/MSH2/TRIP13/SMARCD1/RRM1/AKAP8/USP47/CRLF3/PPP1R9B/RRM2/CDK4/RPS27L/EIF4G1/PRKDC
GO:0048468	BP	GO:0048468	cell development	438	0.217493788283199	1.10885993297861	0.0919707977446219	0.656868851815065	0.627489583877878	396	tags=18%, list=13%, signal=18%	FLNA/S100A9/TPM1/S100A6/MYL9/CDC42/LMNA/FNDC3A/PRTN3/LTF/CREB1/FLNC/LIMD1/POSTN/HERC6/CYB5R4/CSRP1/PGM5/MMP9/ACTA1/ANXA1/TWF1/CFL2/CLIC4/CFL1/TGM2/CLU/CNN2/RRAS/MYH11/LGALS1/GFAP/ISG15/NME2/VCL/BLOC1S3/SORBS2/PDCD6/FGL2/ACTA2/ACTN1/SPP1/MAP1B/COL14A1/WASHC5/VPS33A/TWF2/YWHAH/PBXIP1/TOP2A/SARM1/NEXN/HERC1/RAP1B/TCIRG1/MAP2K2/PPT1/FMR1/ACTG1/SPINK1/DPYSL3/STAT6/PALLD/GPX1/FLNA/LGALS9/FN1/SBDS/MAP4/…
GO:1905898	BP	GO:1905898	positive regulation of response to endoplasmic reticulum stress	12	-0.579639440730997	-1.39808410472516	0.0950155763239875	0.657405068620022	0.628001817726204	236	tags=42%, list=8%, signal=39%	UBQLN1/BAK1/CAV1/NCK1/BCAP31
GO:0090101	BP	GO:0090101	negative regulation of transmembrane receptor protein serine/threonine kinase signaling pathway	20	-0.516360125829564	-1.40192656555454	0.0955882352941176	0.658281520841491	0.628839069543243	738	tags=43%, list=24%, signal=33%	OGT/NCLN/SORL1/FKBP1A/FBN1/PIN1/HTRA1/CAV2/GLG1
GO:0008016	BP	GO:0008016	regulation of heart contraction	39	0.381849195486981	1.3687779986777	0.0955631399317406	0.658281520841491	0.628839069543243	503	tags=34%, list=16%, signal=29%	FLNA/TPM1/DES/ATP1B1/FLNA/SNTA1/GPD1L/ATP2B4/DMD/ATP2A2/ATP1A2/HSPB7/CLIC2/CALM3
GO:0002262	BP	GO:0002262	myeloid cell homeostasis	41	-0.421175073454426	-1.32938597943728	0.0956399437412096	0.658281520841491	0.628839069543243	288	tags=20%, list=9%, signal=18%	CASP3/RPS19/BAK1/ATP5IF1/IKZF1/EPB42/PTBP3/PRKDC
GO:0044843	BP	GO:0044843	cell cycle G1/S phase transition	53	-0.39789060743197	-1.32239160043688	0.0954907161803713	0.658281520841491	0.628839069543243	580	tags=28%, list=19%, signal=23%	PLCG2/CDK1/SDE2/RDX/CUL1/ARID1A/RPL26/SMARCD1/RRM1/CRLF3/RRM2/CDK4/RPS27L/EIF4G1/PRKDC
GO:0001906	BP	GO:0001906	cell killing	51	0.337524528917311	1.29873573392063	0.0954198473282443	0.658281520841491	0.628839069543243	46	tags=10%, list=1%, signal=10%	ARG1/S100A12/AZU1/ELANE/LTF
GO:0032559	MF	GO:0032559	adenyl ribonucleotide binding	401	-0.292919852548799	-1.19772360360097	0.0956340956340956	0.658281520841491	0.628839069543243	864	tags=30%, list=28%, signal=25%	ABCB8/MYO1F/CCT4/THRAP3/HSPH1/LONP1/IARS1/SYN2/RIGI/CKMT1A/AACS/MCM7/FARSA/UBE2O/ACAT1/DHX37/NME3/SMC5/DHX30/ENTPD1/CHD4/EHD4/SPG7/VWA8/DDX21/NDUFA13/DDX46/SMC1A/LARS1/MOV10/MYO5B/CDK19/KIF5B/DDX42/ASNS/SMC3/CHD3/EHD3/WNK1/FBP1/PIP4K2A/WRNIP1/ACSF2/RECQL/SNRNP200/MTPAP/CDK1/SMCHD1/SWAP70/CCT3/SEPHS2/PCCA/CDK5/ATAD3A/MYO1A/ACSS1/PDGFRB/UCKL1/ACBD3/DHX34/KIF2A/SMC2/CTPS1/DDX17/MYO7B/DHX40/PSMC5/DDX…
GO:0014002	BP	GO:0014002	astrocyte development	9	0.615761966748501	1.44375036174204	0.0957746478873239	0.658637439890644	0.629179069674822	361	tags=33%, list=12%, signal=30%	S100A9/GFAP/GRN
GO:0005652	CC	GO:0005652	nuclear lamina	6	0.675864843837952	1.43938429797512	0.0961038961038961	0.658804256991217	0.629338425675237	33	tags=17%, list=1%, signal=17%	LMNA
GO:0032261	BP	GO:0032261	purine nucleotide salvage	4	0.755191234392959	1.41603422189333	0.0964467005076142	0.658804256991217	0.629338425675237	579	tags=75%, list=19%, signal=61%	APRT/ADSL/ADK
GO:0106380	BP	GO:0106380	purine ribonucleotide salvage	4	0.755191234392959	1.41603422189333	0.0964467005076142	0.658804256991217	0.629338425675237	579	tags=75%, list=19%, signal=61%	APRT/ADSL/ADK
GO:1905247	BP	GO:1905247	positive regulation of aspartic-type peptidase activity	3	0.80024484477808	1.38916357492763	0.0963855421686747	0.658804256991217	0.629338425675237	456	tags=67%, list=15%, signal=57%	GRN/PICALM
GO:0035962	BP	GO:0035962	response to interleukin-13	3	0.799964674946785	1.38867722162343	0.0963855421686747	0.658804256991217	0.629338425675237	157	tags=67%, list=5%, signal=63%	ALOX15/CD300LF
GO:0035963	BP	GO:0035963	cellular response to interleukin-13	3	0.799964674946785	1.38867722162343	0.0963855421686747	0.658804256991217	0.629338425675237	157	tags=67%, list=5%, signal=63%	ALOX15/CD300LF
GO:0009650	BP	GO:0009650	UV protection	5	-0.736942226224089	-1.37982042213765	0.0964630225080386	0.658804256991217	0.629338425675237	357	tags=60%, list=12%, signal=53%	FEN1/MFAP4/ERCC4
GO:0051726	BP	GO:0051726	regulation of cell cycle	198	-0.325305758882476	-1.26535209718429	0.0961325966850829	0.658804256991217	0.629338425675237	743	tags=33%, list=24%, signal=27%	ZW10/SMC5/SCRIB/RBM14/CDC73/TPR/DDRGK1/CDK19/PTPN11/RRM2B/ASNS/WNK1/PLCG2/BUB3/CHMP1A/CDK1/CTBP1/CDK5/SDE2/PDGFRB/BABAM1/CDC27/CTNNB1/RDX/CDC5L/SMC2/RAD21/GIT1/CSNK2A1/XPC/BRCC3/ARID1A/FEN1/WDR76/PIN1/FBXO6/CCNK/TOM1L2/PLSCR1/RPL23/RAD50/RPL26/MSH2/CASP3/TRIP13/SMARCD1/MKI67/RRM1/PDXP/BAK1/NCAPD2/UCHL5/GBF1/USP47/CRLF3/SMC4/NCAPG/CAV2/PPP1R9B/RRM2/CDK4/RPS27L/AKT2/EIF4G1/PKP4/PRKDC
GO:1904724	CC	GO:1904724	tertiary granule lumen	26	0.436028333484687	1.4365966003696	0.0965732087227414	0.658989668464038	0.629515544391713	316	tags=32%, list=10%, signal=29%	OLFM4/LTF/MMP9/ALDOC/CNN2/LTA4H/ALDOA/IDH1/CSTB
GO:0061041	BP	GO:0061041	regulation of wound healing	42	-0.418471170786391	-1.32692049947033	0.0969101123595506	0.660720491138654	0.631168953891737	313	tags=21%, list=10%, signal=20%	SRSF6/SERPING1/MTOR/REG3G/CAV1/KNG1/FGG/FGB/FGA
GO:2000649	BP	GO:2000649	regulation of sodium ion transmembrane transporter activity	10	0.586447681667067	1.4406543124402	0.0972222222222222	0.661144434923355	0.631573936268835	437	tags=60%, list=14%, signal=52%	SLMAP/ATP1B1/YWHAH/GPD1L/DMD/ATP1A2
GO:0002704	BP	GO:0002704	negative regulation of leukocyte mediated immunity	10	0.582920943292979	1.43199060550383	0.0972222222222222	0.661144434923355	0.631573936268835	509	tags=30%, list=17%, signal=25%	ARG1/LGALS9/TGFB1
GO:0002707	BP	GO:0002707	negative regulation of lymphocyte mediated immunity	10	0.582920943292979	1.43199060550383	0.0972222222222222	0.661144434923355	0.631573936268835	509	tags=30%, list=17%, signal=25%	ARG1/LGALS9/TGFB1
GO:0010507	BP	GO:0010507	negative regulation of autophagy	19	-0.518310561105454	-1.39278149951474	0.0973451327433628	0.661413504667232	0.63183097153722	643	tags=47%, list=21%, signal=38%	FOXK1/WNK1/CTSA/RASIP1/MTOR/STK38L/RRAGB/SNRNP70/EIF4G1
GO:0014850	BP	GO:0014850	response to muscle activity	7	0.644552579096605	1.42156499471875	0.0975609756097561	0.662313004652715	0.632690240278658	641	tags=57%, list=21%, signal=45%	POSTN/COL6A1/ADSL/DAG1
GO:0051216	BP	GO:0051216	cartilage development	29	0.419400254665213	1.41409938710288	0.0978593272171254	0.662373948142574	0.632748457995917	509	tags=45%, list=17%, signal=38%	LOXL2/COL2A1/CHI3L1/GPLD1/PBXIP1/COL3A1/COL1A1/SERPINH1/MAPK14/COL6A1/BGN/TGFBI/TGFB1
GO:0045039	BP	GO:0045039	protein insertion into mitochondrial inner membrane	5	-0.734600227746773	-1.37543536017129	0.0980707395498392	0.662373948142574	0.632748457995917	686	tags=60%, list=22%, signal=47%	NDUFA13/TIMM9/TIMM8A
GO:0016891	MF	GO:0016891	RNA endonuclease activity, producing 5'-phosphomonoesters	5	-0.733068759922218	-1.37256790258103	0.0980707395498392	0.662373948142574	0.632748457995917	357	tags=80%, list=12%, signal=71%	AGO2/RPP30/FEN1/ELAC2
GO:0016893	MF	GO:0016893	endonuclease activity, active with either ribo- or deoxyribonucleic acids and producing 5'-phosphomonoesters	5	-0.733068759922218	-1.37256790258103	0.0980707395498392	0.662373948142574	0.632748457995917	357	tags=80%, list=12%, signal=71%	AGO2/RPP30/FEN1/ELAC2
GO:0001666	BP	GO:0001666	response to hypoxia	65	-0.38368734320082	-1.30750953571666	0.0979381443298969	0.662373948142574	0.632748457995917	288	tags=11%, list=9%, signal=10%	CASP3/ACAA2/APAF1/MTOR/CAV1/COMT/ALKBH5
GO:0055085	BP	GO:0055085	transmembrane transport	200	0.245987048837834	1.165856808438	0.097820755052067	0.662373948142574	0.632748457995917	437	tags=21%, list=14%, signal=19%	FLNA/CLCA1/S100A6/SLMAP/TOMM40/GC/SORBS1/MMP9/TIMM50/TMEM109/CLIC4/SLC2A4/SORBS1/GFAP/ATP1B1/BLOC1S3/CLIC1/SLC2A3/STOM/FKBP1A/YWHAH/NIPSNAP2/ATP5F1D/TCIRG1/YWHAQ/FMR1/SEC63/FLNA/STXBP3/ATP5MG/SLC25A4/SNTA1/ATP13A1/GPD1L/ATP2B4/MAPK14/COL6A1/ANXA6/DMD/ATP2A2/SLC45A2/ATP1A2
GO:0007411	BP	GO:0007411	axon guidance	23	-0.495941840216998	-1.39815376035858	0.0982658959537572	0.662564273822445	0.632930271125484	652	tags=35%, list=21%, signal=28%	RPL24/KIF5B/PGRMC1/LYPLA2/CDK5/NECTIN1/ERBB2/RPS6KA5
GO:0097485	BP	GO:0097485	neuron projection guidance	23	-0.495941840216998	-1.39815376035858	0.0982658959537572	0.662564273822445	0.632930271125484	652	tags=35%, list=21%, signal=28%	RPL24/KIF5B/PGRMC1/LYPLA2/CDK5/NECTIN1/ERBB2/RPS6KA5
GO:0002418	BP	GO:0002418	immune response to tumor cell	4	0.753712533527982	1.41326155858185	0.0989847715736041	0.663465495952806	0.63379118498675	670	tags=75%, list=22%, signal=59%	TGFB1/HMGB1/HSPD1
GO:0002834	BP	GO:0002834	regulation of response to tumor cell	4	0.753712533527982	1.41326155858185	0.0989847715736041	0.663465495952806	0.63379118498675	670	tags=75%, list=22%, signal=59%	TGFB1/HMGB1/HSPD1
GO:0002837	BP	GO:0002837	regulation of immune response to tumor cell	4	0.753712533527982	1.41326155858185	0.0989847715736041	0.663465495952806	0.63379118498675	670	tags=75%, list=22%, signal=59%	TGFB1/HMGB1/HSPD1
GO:0043200	BP	GO:0043200	response to amino acid	27	-0.464675681487243	-1.3667717314832	0.0985294117647059	0.663465495952806	0.63379118498675	288	tags=22%, list=9%, signal=20%	CASP3/MTOR/RRAGB/DNMT1/PPP1R9B/MYD88
GO:0044754	CC	GO:0044754	autolysosome	4	-0.768693484056624	-1.36218095358556	0.0986842105263158	0.663465495952806	0.63379118498675	699	tags=80%, list=23%, signal=62%	FTL/LAMP1/FTL/FTH1
GO:0033151	BP	GO:0033151	V(D)J recombination	3	-0.810894801873031	-1.33668672658221	0.0988074957410562	0.663465495952806	0.63379118498675	10	tags=67%, list=0%, signal=67%	HMGB2/PRKDC
GO:0043325	MF	GO:0043325	phosphatidylinositol-3,4-bisphosphate binding	3	-0.810181893622201	-1.33551156182106	0.0988074957410562	0.663465495952806	0.63379118498675	140	tags=67%, list=5%, signal=64%	HIP1/HIP1R
GO:0051787	MF	GO:0051787	misfolded protein binding	8	-0.646614196874048	-1.4024246775301	0.0993690851735016	0.664666440040004	0.634938415371407	372	tags=50%, list=12%, signal=44%	DNAJC10/DNAJB11/DERL1/SDF2
GO:0071453	BP	GO:0071453	cellular response to oxygen levels	35	0.394990251814136	1.40129799688314	0.0993589743589744	0.664666440040004	0.634938415371407	532	tags=33%, list=17%, signal=28%	CLCA1/LMNA/SLC2A4/AK4/HP1BP3/FABP1/PGK1/P4HB/PTGIS/NDUFS2/TGFB1/ENO1
GO:1903046	BP	GO:1903046	meiotic cell cycle process	24	-0.488316611270429	-1.38861775949108	0.0994152046783626	0.664666440040004	0.634938415371407	468	tags=38%, list=15%, signal=32%	SMC2/RAD21/SEPTIN1/TOP2B/RAD50/TRIP13/NCAPD2/SMC4/ERCC4
GO:0003254	BP	GO:0003254	regulation of membrane depolarization	8	0.627301099265988	1.43910311037193	0.10054347826087	0.669390137146192	0.639450839310122	364	tags=38%, list=12%, signal=33%	SLMAP/ALB/GPD1L
GO:0001527	CC	GO:0001527	microfibril	6	-0.710785902524554	-1.39495444072453	0.100486223662885	0.669390137146192	0.639450839310122	602	tags=67%, list=20%, signal=54%	LTBP4/FBN1/MFAP2/MFAP4
GO:0004527	MF	GO:0004527	exonuclease activity	18	-0.518959842715408	-1.3876294400411	0.100436681222707	0.669390137146192	0.639450839310122	1161	tags=67%, list=38%, signal=42%	DIS3L2/DIS3/EXOSC4/CPSF3/DCPS/CNOT2/FEN1/CNOT1/RAD50/EXOG/XRN2/POLD1
GO:0006661	BP	GO:0006661	phosphatidylinositol biosynthetic process	18	-0.518290721913167	-1.38584030021234	0.100436681222707	0.669390137146192	0.639450839310122	1315	tags=72%, list=43%, signal=42%	INPPL1/DPM3/PIK3CD/SYNJ1/VAC14/SACM1L/MTMR3/INPP5D/PIP4K2A/PLCG2/MBOAT7/PIGT/MPPE1
GO:1902680	BP	GO:1902680	positive regulation of RNA biosynthetic process	248	-0.312298490387439	-1.23735108019797	0.100431965442765	0.669390137146192	0.639450839310122	738	tags=26%, list=24%, signal=21%	OGT/RBM14/PCBP1/CHD4/RNF40/CDC73/TRIM25/DDRGK1/DDX21/ARHGEF2/SERPINF2/FOXK1/ITGA6/MAFG/CHD3/APOE/PELP1/WNK1/NFYC/HNRNPAB/GATAD2B/CTBP1/HNRNPD/LMO7/CTNNB1/CDC5L/TAF15/UBTF/DDX17/PSMC5/HNF4A/FADD/SCAF8/XPC/ARID1A/TOP2B/PIN1/CCNK/CHP2/PLSCR1/MYCBP/CRTC2/MEF2D/RBMX/CDH1/SMARCD1/MTOR/ERBB2/UCHL5/DAXX/PRKCB/TSTD1/CRLF3/RNF20/MKRN2/NCK1/MEF2B/SPIN1/ZNF593/SUPT6H/MYD88/MRPL12/PRKDC/RPS6KA5
GO:0071902	BP	GO:0071902	positive regulation of protein serine/threonine kinase activity	24	0.433383738057719	1.40630034747825	0.10062893081761	0.669397481113624	0.639457854809571	46	tags=12%, list=1%, signal=12%	S100A12/ELANE/LTF
GO:0006364	BP	GO:0006364	rRNA processing	70	-0.379821630798708	-1.30512107426869	0.100893997445722	0.670598629588984	0.640605280440877	912	tags=56%, list=30%, signal=40%	EIF6/EIF4A3/RRP12/RPL5/WDR46/DIS3/EXOSC6/RPS28/EXOSC4/NOP2/GTPBP4/EBNA1BP2/RPL7A/WDR3/BOP1/RPS25/SART1/DHX37/RPS14/TRMT112/DDX21/NOB1/RPS17/RPS21/PELP1/SDE2/RPL35/DDX17/DDX27/MRM1/TSR1/DDX47/RPL26/XRN2/RPS19/MTREX/DDX10/FTSJ3/PRKDC
GO:0098760	BP	GO:0098760	response to interleukin-7	11	0.554543825485617	1.43940145227034	0.101092896174863	0.670797010069997	0.64079478811069	956	tags=55%, list=31%, signal=38%	P4HB/PDIA3/LSP1/HSPD1/YBX1/ATIC
GO:0098761	BP	GO:0098761	cellular response to interleukin-7	11	0.554543825485617	1.43940145227034	0.101092896174863	0.670797010069997	0.64079478811069	956	tags=55%, list=31%, signal=38%	P4HB/PDIA3/LSP1/HSPD1/YBX1/ATIC
GO:2000027	BP	GO:2000027	regulation of animal organ morphogenesis	5	-0.728752027020565	-1.36448542880947	0.101286173633441	0.671518023354205	0.641483553188268	480	tags=60%, list=16%, signal=51%	AGT/CTNNB1/PRKCB
GO:0021761	BP	GO:0021761	limbic system development	20	-0.509804755344125	-1.38412862266376	0.101470588235294	0.672179122066189	0.642115083446611	840	tags=50%, list=27%, signal=37%	XRCC1/FXR2/RAN/UQCRQ/FXR1/CDK5/CTNNB1/CASP3/XRN2/PPP1R9B
GO:0071218	BP	GO:0071218	cellular response to misfolded protein	6	-0.707922511329353	-1.38933488601883	0.102106969205835	0.672548981075717	0.642468400056679	208	tags=50%, list=7%, signal=47%	VCP/CAV1/DERL1
GO:0007565	BP	GO:0007565	female pregnancy	30	-0.451630453001554	-1.34930336481331	0.102373887240356	0.672548981075717	0.642468400056679	436	tags=26%, list=14%, signal=22%	DSG2/FBLN1/FKBP4/AMBP/PARP2/ITGB4/TMED2/PZP
GO:0044703	BP	GO:0044703	multi-organism reproductive process	30	-0.451630453001554	-1.34930336481331	0.102373887240356	0.672548981075717	0.642468400056679	436	tags=26%, list=14%, signal=22%	DSG2/FBLN1/FKBP4/AMBP/PARP2/ITGB4/TMED2/PZP
GO:0001652	CC	GO:0001652	granular component	3	-0.808321995049292	-1.3324456872718	0.10221465076661	0.672548981075717	0.642468400056679	63	tags=67%, list=2%, signal=65%	FBL/CLEC3B
GO:0009880	BP	GO:0009880	embryonic pattern specification	3	-0.807598668680426	-1.3312533491855	0.10221465076661	0.672548981075717	0.642468400056679	480	tags=67%, list=16%, signal=56%	CTNNB1/TMED2
GO:1904627	BP	GO:1904627	response to phorbol 13-acetate 12-myristate	3	-0.806966145833333	-1.33021069249068	0.10221465076661	0.672548981075717	0.642468400056679	597	tags=100%, list=19%, signal=81%	MAP4K1/CDK4
GO:1904628	BP	GO:1904628	cellular response to phorbol 13-acetate 12-myristate	3	-0.806966145833333	-1.33021069249068	0.10221465076661	0.672548981075717	0.642468400056679	597	tags=100%, list=19%, signal=81%	MAP4K1/CDK4
GO:0006369	BP	GO:0006369	termination of RNA polymerase II transcription	3	-0.806640625	-1.32967410084385	0.10221465076661	0.672548981075717	0.642468400056679	598	tags=100%, list=19%, signal=81%	SCAF8/XRN2
GO:0070482	BP	GO:0070482	response to oxygen levels	76	-0.365942931367965	-1.27504340337277	0.101758793969849	0.672548981075717	0.642468400056679	288	tags=10%, list=9%, signal=10%	CASP3/ACAA2/APAF1/MTOR/CAV1/COMT/PARP2/ALKBH5
GO:0009895	BP	GO:0009895	negative regulation of catabolic process	105	-0.35177288007022	-1.27258957704648	0.102163461538462	0.672548981075717	0.642468400056679	738	tags=33%, list=24%, signal=26%	OGT/ELAVL1/SYNCRIP/DDRGK1/FOXK1/WNK1/FBP1/HNRNPAB/SORL1/CSDE1/HNRNPD/SNX12/DHX34/CTSA/TAF15/GIT1/SLC4A1/UBXN1/CSNK2A1/RASIP1/PLIN5/RBM10/PIN1/RPL23/F8A1/MTOR/STK38L/RRAGB/UCHL5/IGF2BP2/SLIRP/HP/SNRNP70/EIF4G1/MYD88
GO:0035751	BP	GO:0035751	regulation of lysosomal lumen pH	12	0.538183774859487	1.41912136869366	0.102777777777778	0.673529681622167	0.643405237564045	434	tags=42%, list=14%, signal=36%	VPS33A/TCIRG1/PPT1/GRN/SLC45A2
GO:1990752	CC	GO:1990752	microtubule end	12	0.538139222697875	1.41900389037581	0.102777777777778	0.673529681622167	0.643405237564045	175	tags=25%, list=6%, signal=24%	CLIP1/CLIP2/TBCB
GO:1903909	BP	GO:1903909	regulation of receptor clustering	7	-0.65925063840519	-1.37323143456551	0.102685624012638	0.673529681622167	0.643405237564045	187	tags=29%, list=6%, signal=27%	GRIPAP1/MESD
GO:0043534	BP	GO:0043534	blood vessel endothelial cell migration	30	0.41408793738088	1.40176207938825	0.103658536585366	0.678741044836191	0.648383516143655	567	tags=37%, list=18%, signal=30%	ANXA1/HSPB1/APOA1/HDAC7/GPLD1/GPX1/ATP2B4/SH3BP1/TGFB1/MYH9/HMGB1
GO:0001891	CC	GO:0001891	phagocytic cup	9	0.600818512110945	1.40871309214162	0.104225352112676	0.681889855207088	0.651391492094844	713	tags=60%, list=23%, signal=46%	ANXA1/BIN2/SH3BP1/ARHGAP25/LCP1/TRIP10
GO:0031123	BP	GO:0031123	RNA 3'-end processing	27	-0.461191888227071	-1.35652469180362	0.104411764705882	0.682546758406822	0.652019014490388	710	tags=41%, list=23%, signal=32%	CDC73/RPS21/MTPAP/CPSF7/SCAF8/VIRMA/SYMPK/ELAC2/INTS5/TRNT1/NUDT21
GO:0010591	BP	GO:0010591	regulation of lamellipodium assembly	18	0.477229883650607	1.41068198166123	0.104761904761905	0.684271996864589	0.653667089534536	452	tags=28%, list=15%, signal=24%	CDC42/TWF1/TWF2/ACTR2/NCKAP1
GO:1901019	BP	GO:1901019	regulation of calcium ion transmembrane transporter activity	17	0.472716297698219	1.38600764068327	0.104938271604938	0.684297554196212	0.653691503783043	503	tags=44%, list=16%, signal=37%	ATP1B1/FKBP1A/NIPSNAP2/FMR1/DMD/ATP1A2/CLIC2/CALM3
GO:0006357	BP	GO:0006357	regulation of transcription by RNA polymerase II	277	-0.305941986589794	-1.22177758190969	0.104925053533191	0.684297554196212	0.653691503783043	771	tags=26%, list=25%, signal=22%	RPS14/MEPCE/KDM1A/OGT/RALY/RBM14/PCBP1/CHD4/RNF40/CDC73/TPR/DDRGK1/DDX21/ARHGEF2/ANXA4/SERPINF2/FOXK1/ITGA6/MAFG/CHD3/PELP1/FBP1/NFYC/ADNP/GATAD2B/CDK1/CNOT2/CTBP1/LMO7/CTNNB1/CDC5L/RAD21/DDX17/NCOA5/PSMC5/HNF4A/FADD/SCAF8/HNRNPA2B1/ARID1A/CNOT1/RBM10/PIN1/CCNK/CHP2/PLSCR1/SP140/RPL23/CRTC2/MEF2D/IGBP1/RBMX/BRD2/SMARCD1/CAV1/IKZF1/PRKCB/TSTD1/CRLF3/RNF20/MKRN2/NCK1/MEF2B/DNMT1/SAFB2/ZNF593/BAZ1A/…
GO:0035767	BP	GO:0035767	endothelial cell chemotaxis	5	0.707744435956824	1.42708664447328	0.105263157894737	0.685852562440584	0.655176962369626	105	tags=20%, list=3%, signal=19%	HSPB1
GO:0001952	BP	GO:0001952	regulation of cell-matrix adhesion	33	0.399385425797114	1.39663361211385	0.105431309904153	0.686384639376014	0.655685241509186	784	tags=36%, list=25%, signal=27%	POSTN/RRAS/VCL/ACTG1/TLN1/CD3E/DAG1/CDH13/SRC/PTK2/MINK1/FERMT2
GO:0006573	BP	GO:0006573	valine metabolic process	3	-0.804447955688475	-1.32605968383473	0.105621805792164	0.686498485476339	0.65579399570254	90	tags=100%, list=3%, signal=97%	ALDH6A1/ILVBL
GO:0006658	BP	GO:0006658	phosphatidylserine metabolic process	3	-0.804319229558393	-1.32584749045398	0.105621805792164	0.686498485476339	0.65579399570254	327	tags=67%, list=11%, signal=60%	PLSCR1/ABHD12
GO:0044406	BP	GO:0044406	adhesion of symbiont to host	3	0.795068037638669	1.3801770354211	0.106024096385542	0.688539330569234	0.65774356148658	46	tags=33%, list=1%, signal=33%	LTF
GO:0030688	CC	GO:0030688	preribosome, small subunit precursor	5	-0.725029336909246	-1.35751521641276	0.106109324758842	0.688539330569234	0.65774356148658	690	tags=60%, list=22%, signal=47%	NOB1/TSR1/FTSJ3
GO:0043536	BP	GO:0043536	positive regulation of blood vessel endothelial cell migration	14	0.502581840711253	1.39212220598686	0.106508875739645	0.689608137696224	0.658764564899221	567	tags=36%, list=18%, signal=29%	ANXA1/HSPB1/HDAC7/TGFB1/HMGB1
GO:0140612	MF	GO:0140612	DNA damage sensor activity	6	-0.70253943729963	-1.37877032220877	0.106969205834684	0.689608137696224	0.658764564899221	366	tags=67%, list=12%, signal=59%	UHRF1/RAD23B/XPC/MSH2
GO:0006767	BP	GO:0006767	water-soluble vitamin metabolic process	14	-0.543218388275839	-1.36763167886214	0.106927710843373	0.689608137696224	0.658764564899221	721	tags=43%, list=23%, signal=33%	AKR1B1/MMAA/SHMT1/PDXP/PDXK/CUBN
GO:0006383	BP	GO:0006383	transcription by RNA polymerase III	14	-0.542766653159902	-1.36649436969083	0.106927710843373	0.689608137696224	0.658764564899221	905	tags=40%, list=29%, signal=28%	DEK/GTF3C1/DDX21/MTOR/POLR2E/POLR2K
GO:0004402	MF	GO:0004402	histone acetyltransferase activity	4	-0.763175912799829	-1.35240341464196	0.106907894736842	0.689608137696224	0.658764564899221	320	tags=50%, list=10%, signal=45%	MCM3AP/HAT1
GO:0004714	MF	GO:0004714	transmembrane receptor protein tyrosine kinase activity	4	-0.761865854297558	-1.35008189536686	0.106907894736842	0.689608137696224	0.658764564899221	501	tags=75%, list=16%, signal=63%	PDGFRB/EFEMP1/ERBB2
GO:0106002	CC	GO:0106002	mCRD-mediated mRNA stability complex	4	-0.76131720306481	-1.34910964534145	0.106907894736842	0.689608137696224	0.658764564899221	698	tags=75%, list=23%, signal=58%	SYNCRIP/CSDE1/HNRNPD
GO:1904375	BP	GO:1904375	regulation of protein localization to cell periphery	44	-0.404050139636964	-1.30392132958524	0.106703146374829	0.689608137696224	0.658764564899221	972	tags=40%, list=32%, signal=28%	GBP1/EZR/RACK1/AP2M1/LGALS3/EPB41L2/OGT/KIF5B/WNK1/PGRMC1/CDK5/STX7/RSC1A1/GRIPAP1/PPP1R9B/TMED2/VAMP8/EIF4G1
GO:0009799	BP	GO:0009799	specification of symmetry	5	-0.724146843552846	-1.35586287201963	0.107717041800643	0.69274104029976	0.661757344577524	603	tags=60%, list=20%, signal=48%	NCLN/CTNNB1/TMED2
GO:0009855	BP	GO:0009855	determination of bilateral symmetry	5	-0.724146843552846	-1.35586287201963	0.107717041800643	0.69274104029976	0.661757344577524	603	tags=60%, list=20%, signal=48%	NCLN/CTNNB1/TMED2
GO:0034470	BP	GO:0034470	ncRNA processing	106	-0.347368431472113	-1.25945447208888	0.107655502392345	0.69274104029976	0.661757344577524	1156	tags=48%, list=38%, signal=31%	RRP12/RPL5/WDR46/AARS1/DIS3/EXOSC6/STAT3/RPS28/EXOSC4/TRMT1/NOP2/GTPBP4/LAGE3/INTS11/THUMPD1/EBNA1BP2/ADAR/RPL7A/PRKRA/WDR3/BOP1/RPS25/SART1/DHX37/RPS14/TRMT112/DDX21/NOB1/RPS17/RPS21/PELP1/SRSF3/SDE2/RPL35/DDX17/DDX27/MRM1/TSR1/DDX47/HNRNPA2B1/RPL26/XRN2/RPS19/MTREX/ELAC2/INTS5/TRNT1/DDX10/FTSJ3/TP53RK/PRKDC
GO:0042596	BP	GO:0042596	fear response	9	-0.613096040838988	-1.38087700506045	0.108191653786708	0.69410587263647	0.663061133108003	125	tags=33%, list=4%, signal=32%	APOE/COMT/EIF4G1
GO:0010604	BP	GO:0010604	positive regulation of macromolecule metabolic process	619	-0.279246260096848	-1.15632959395512	0.108163265306122	0.69410587263647	0.663061133108003	738	tags=24%, list=24%, signal=23%	OGT/SCRIB/GGA3/RBM14/PCBP1/ITGA1/CHD4/SRSF1/TRMT112/AIMP2/RNF40/EHD4/ELAVL1/CDC73/SYNCRIP/TRIM25/DDRGK1/DDX21/NDUFA13/RPS4X/PDCD5/ARHGEF2/SERPINF2/MOV10/FXR1/FOXK1/ITGA6/PTPN11/MAFG/TAB1/CHD3/APOE/PELP1/WNK1/FCN1/PRRC1/PLCG2/UBQLN1/NFYC/ADNP/HNRNPAB/GATAD2B/CDK1/SORL1/SMCHD1/CNOT2/CTBP1/GTPBP1/CSDE1/HNRNPD/MRPS27/CCT3/DIP2B/LMO7/PDGFRB/BABAM1/CTNNB1/RDX/DHX34/CDC5L/RAD21/TAF15/UBTF/DDX17/CHP1/PSM…
GO:0033036	BP	GO:0033036	macromolecule localization	739	-0.276055609662638	-1.14791207284166	0.108190091001011	0.69410587263647	0.663061133108003	769	tags=25%, list=25%, signal=25%	EPB41L2/PREB/MEPCE/SEC24A/FXR2/VPS36/KDM1A/RAB2A/PITPNB/ZW10/TOMM7/SMC5/OGT/SCRIB/GGA3/SRSF1/EHD4/ELAVL1/RAN/EPB41L3/TOM1/TPR/TRIM25/DDRGK1/NDUFA13/TIMM9/PDCD5/ARHGEF2/TRAPPC12/UBAC2/CORO1C/MYO5B/FXR1/PTPN11/KIF5B/DDX42/NPC1L1/SNX2/FABP6/EHD3/APOE/SRSF7/NCLN/WNK1/PIP4K2A/FCN1/PDZK1/PGRMC1/LTBP2/TNPO3/BUB3/CHMP1A/ARFIP1/SRSF3/GNPTAB/ITGA4/CDK1/SORL1/TPP1/SWAP70/SRP68/SRPRA/CCT3/NHERF2/VPS37C/CDS2/…
GO:0071680	BP	GO:0071680	response to indole-3-methanol	4	-0.761019307661304	-1.3485817529458	0.108552631578947	0.69417702192629	0.663129100158259	480	tags=75%, list=16%, signal=63%	CTNNA1/CTNNB1/CDH1
GO:0007063	BP	GO:0007063	regulation of sister chromatid cohesion	4	-0.760664278736568	-1.34795261578089	0.108552631578947	0.69417702192629	0.663129100158259	740	tags=100%, list=24%, signal=76%	CTNNB1/RAD21/FEN1
GO:0006680	BP	GO:0006680	glucosylceramide catabolic process	4	-0.759943157639545	-1.34667473656899	0.108552631578947	0.69417702192629	0.663129100158259	295	tags=75%, list=10%, signal=68%	PRKCD/GBA3/GBA2
GO:0046477	BP	GO:0046477	glycosylceramide catabolic process	4	-0.759943157639545	-1.34667473656899	0.108552631578947	0.69417702192629	0.663129100158259	295	tags=75%, list=10%, signal=68%	PRKCD/GBA3/GBA2
GO:0098631	MF	GO:0098631	cell adhesion mediator activity	25	0.421647347408922	1.37838072335713	0.108695652173913	0.694531961072604	0.663468164214359	534	tags=36%, list=17%, signal=30%	S100A11/ANXA1/NEXN/PALLD/CD47/TMOD3/SIRPA/RAB10/PPP1CA
GO:1902396	BP	GO:1902396	protein localization to bicellular tight junction	4	0.74996926186091	1.4062426731115	0.109137055837563	0.696279012415939	0.665137076535918	327	tags=60%, list=11%, signal=54%	FLNA/ACTG1/FLNA
GO:0007422	BP	GO:0007422	peripheral nervous system development	19	-0.507468418743911	-1.36364696815567	0.109144542772861	0.696279012415939	0.665137076535918	622	tags=37%, list=20%, signal=30%	NDRG1/CDK1/CDK5/ERBB2/TBCE/ITGB4/AKT2
GO:0090136	BP	GO:0090136	epithelial cell-cell adhesion	5	0.704716103267581	1.42098035395897	0.110526315789474	0.697030912874955	0.66585534732139	154	tags=20%, list=5%, signal=19%	VCL
GO:0045806	BP	GO:0045806	negative regulation of endocytosis	22	0.445457219789427	1.4045076967652	0.109717868338558	0.697030912874955	0.66585534732139	456	tags=36%, list=15%, signal=31%	PRTN3/CNN2/CD300LF/APOC3/ATXN2/CD47/SIRPA/PICALM
GO:0007566	BP	GO:0007566	embryo implantation	14	0.501494817186919	1.38911121461376	0.109467455621302	0.697030912874955	0.66585534732139	189	tags=33%, list=6%, signal=31%	MMP9/ARHGDIB/BSG/RPL29/SPP1
GO:0016830	MF	GO:0016830	carbon-carbon lyase activity	14	0.501473149515733	1.38905119643609	0.109467455621302	0.697030912874955	0.66585534732139	397	tags=40%, list=13%, signal=35%	ALDOC/DDT/ALDOA/ALDOB/UROD/ME2
GO:0007492	BP	GO:0007492	endoderm development	24	0.427159194405372	1.38610213251887	0.110062893081761	0.697030912874955	0.66585534732139	524	tags=38%, list=17%, signal=31%	MMP9/LAMC1/ITGA5/PELO/ITGA7/FN1/COL6A1/LAMB1/MYH9
GO:0006941	BP	GO:0006941	striated muscle contraction	36	0.390997815329627	1.38083551031599	0.110738255033557	0.697030912874955	0.66585534732139	503	tags=33%, list=16%, signal=28%	FLNA/TPM1/SYNM/ATP1B1/ALDOA/FLNA/SNTA1/GPD1L/DMD/ATP2A2/ATP1A2/CLIC2/CALM3
GO:0099111	BP	GO:0099111	microtubule-based transport	36	0.390944266728767	1.38064639977189	0.110738255033557	0.697030912874955	0.66585534732139	198	tags=14%, list=6%, signal=13%	CDC42/HSPB1/BAG3/BLOC1S3/MAP1B
GO:0036315	BP	GO:0036315	cellular response to sterol	3	0.792317708333333	1.37540267503008	0.110843373493976	0.697030912874955	0.66585534732139	641	tags=100%, list=21%, signal=79%	GPLD1/CES1/DAG1
GO:0071397	BP	GO:0071397	cellular response to cholesterol	3	0.792317708333333	1.37540267503008	0.110843373493976	0.697030912874955	0.66585534732139	641	tags=100%, list=21%, signal=79%	GPLD1/CES1/DAG1
GO:0032968	BP	GO:0032968	positive regulation of transcription elongation by RNA polymerase II	6	-0.697773975277283	-1.369417854206	0.110210696920583	0.697030912874955	0.66585534732139	710	tags=67%, list=23%, signal=51%	CDC73/CTNNB1/CCNK/SUPT6H
GO:0006312	BP	GO:0006312	mitotic recombination	7	-0.655705275134677	-1.36584637643071	0.110584518167457	0.697030912874955	0.66585534732139	840	tags=86%, list=27%, signal=62%	TEP1/XRCC1/SMC5/RAD50/MSH2/ERCC4
GO:0043394	MF	GO:0043394	proteoglycan binding	15	0.483701614628774	1.3646966563014	0.109792284866469	0.697030912874955	0.66585534732139	85	tags=20%, list=3%, signal=20%	FCN2/AZU1/COL2A1
GO:0099054	BP	GO:0099054	presynapse assembly	3	-0.800153223948972	-1.31898020706763	0.110732538330494	0.697030912874955	0.66585534732139	25	tags=67%, list=1%, signal=66%	VPS35/EIF4G1
GO:0099174	BP	GO:0099174	regulation of presynapse organization	3	-0.800153223948972	-1.31898020706763	0.110732538330494	0.697030912874955	0.66585534732139	25	tags=67%, list=1%, signal=66%	VPS35/EIF4G1
GO:1905606	BP	GO:1905606	regulation of presynapse assembly	3	-0.800153223948972	-1.31898020706763	0.110732538330494	0.697030912874955	0.66585534732139	25	tags=67%, list=1%, signal=66%	VPS35/EIF4G1
GO:1900017	BP	GO:1900017	positive regulation of cytokine production involved in inflammatory response	3	-0.800088161841115	-1.3188729580684	0.110732538330494	0.697030912874955	0.66585534732139	20	tags=100%, list=1%, signal=99%	STAT3/MYD88
GO:0030674	MF	GO:0030674	protein-macromolecule adaptor activity	229	-0.311922510768109	-1.22997969511591	0.109544468546638	0.697030912874955	0.66585534732139	736	tags=23%, list=24%, signal=19%	RALY/SCRIB/ZZEF1/LPXN/RBM14/CHD4/EPB41L3/TRIM25/FXR1/PTPN11/DCAF7/DHRS7B/WNK1/PDZK1/CNOT2/CTBP1/NHERF2/VTI1A/STX7/CTNNB1/G3BP2/TAF15/DDX17/NCOA5/SLC4A1/FADD/HNRNPA2B1/CUL1/XPC/ARID1A/SRSF2/MYCBP/RAD50/KEAP1/TRIP13/SMARCD1/FKBP4/SHARPIN/CAV1/DAXX/PRKCB/RNF20/NCK1/TDP2/IGF2BP2/HIP1R/CAV2/SYNE3/ALYREF/AP1G1/VAMP8/MYD88/ALKBH5
GO:0045893	BP	GO:0045893	positive regulation of DNA-templated transcription	247	-0.308701598158163	-1.22138124831182	0.110629067245119	0.697030912874955	0.66585534732139	738	tags=25%, list=24%, signal=21%	OGT/RBM14/PCBP1/CHD4/RNF40/CDC73/TRIM25/DDRGK1/DDX21/ARHGEF2/SERPINF2/FOXK1/ITGA6/MAFG/CHD3/APOE/PELP1/WNK1/NFYC/HNRNPAB/GATAD2B/CTBP1/HNRNPD/LMO7/CTNNB1/CDC5L/TAF15/UBTF/DDX17/PSMC5/HNF4A/FADD/SCAF8/XPC/ARID1A/PIN1/CCNK/CHP2/PLSCR1/MYCBP/CRTC2/MEF2D/RBMX/CDH1/SMARCD1/MTOR/ERBB2/UCHL5/DAXX/PRKCB/TSTD1/CRLF3/RNF20/MKRN2/NCK1/MEF2B/SPIN1/ZNF593/SUPT6H/MYD88/MRPL12/PRKDC/RPS6KA5
GO:0005342	MF	GO:0005342	organic acid transmembrane transporter activity	15	-0.538139345187302	-1.37249429648648	0.111278195488722	0.697554312321087	0.666355337083042	737	tags=40%, list=24%, signal=31%	SFXN5/SFXN1/SLC51B/SLC25A10/SLC25A22/ABCC3
GO:0046943	MF	GO:0046943	carboxylic acid transmembrane transporter activity	15	-0.538139345187302	-1.37249429648648	0.111278195488722	0.697554312321087	0.666355337083042	737	tags=40%, list=24%, signal=31%	SFXN5/SFXN1/SLC51B/SLC25A10/SLC25A22/ABCC3
GO:0043502	BP	GO:0043502	regulation of muscle adaptation	17	0.46470202200705	1.36250972576772	0.111111111111111	0.697554312321087	0.666355337083042	425	tags=24%, list=14%, signal=20%	LMNA/TWF1/ATP2B4/ATP2A2
GO:0015718	BP	GO:0015718	monocarboxylic acid transport	28	-0.455204422410962	-1.34182491218089	0.111275964391691	0.697554312321087	0.666355337083042	616	tags=29%, list=20%, signal=23%	FABP6/APOE/EPRS1/SLC51B/ABCC3/ABCD3/MIF/AKT2
GO:0051963	BP	GO:0051963	regulation of synapse assembly	11	-0.587455033590154	-1.37986668924227	0.111635220125786	0.69924002124565	0.667965650601015	738	tags=55%, list=24%, signal=42%	OGT/CHD4/ADNP/CTNNB1/NECTIN1/EIF4G1
GO:0044706	BP	GO:0044706	multi-multicellular organism process	31	-0.445169850140821	-1.33534630158263	0.111929307805596	0.699977136915062	0.668669797864797	436	tags=25%, list=14%, signal=22%	DSG2/FBLN1/FKBP4/AMBP/PARP2/ITGB4/TMED2/PZP
GO:0000380	BP	GO:0000380	alternative mRNA splicing, via spliceosome	31	-0.445160158328201	-1.33531722969887	0.111929307805596	0.699977136915062	0.668669797864797	526	tags=47%, list=17%, signal=39%	HNRNPUL1/SFPQ/PTBP1/THRAP3/HNRNPL/SRSF1/HNRNPM/DDX17/SMU1/SRSF2/SRSF6/RBM8A/RBMX/TRA2B/CELF2
GO:0034704	CC	GO:0034704	calcium channel complex	5	0.703677225140546	1.41888557366116	0.113157894736842	0.699981233344593	0.668673711076475	503	tags=50%, list=16%, signal=42%	FKBP1A/MCU/CALM3
GO:0010970	BP	GO:0010970	transport along microtubule	35	0.391669392542937	1.38951665943674	0.112179487179487	0.699981233344593	0.668673711076475	198	tags=14%, list=6%, signal=14%	CDC42/HSPB1/BAG3/BLOC1S3/MAP1B
GO:0061975	BP	GO:0061975	articular cartilage development	3	0.78520178616297	1.36304998079457	0.113253012048193	0.699981233344593	0.668673711076475	433	tags=67%, list=14%, signal=57%	PBXIP1/BGN
GO:1901163	BP	GO:1901163	regulation of trophoblast cell migration	3	0.784919137550004	1.36255932451581	0.113253012048193	0.699981233344593	0.668673711076475	128	tags=33%, list=4%, signal=32%	ARHGDIB
GO:0002562	BP	GO:0002562	somatic diversification of immune receptors via germline recombination within a single locus	14	-0.539077995861861	-1.35720763587963	0.112951807228916	0.699981233344593	0.668673711076475	291	tags=29%, list=9%, signal=26%	SWAP70/MSH2/SUPT6H/PRKDC
GO:0016444	BP	GO:0016444	somatic cell DNA recombination	14	-0.539077995861861	-1.35720763587963	0.112951807228916	0.699981233344593	0.668673711076475	291	tags=29%, list=9%, signal=26%	SWAP70/MSH2/SUPT6H/PRKDC
GO:0000314	CC	GO:0000314	organellar small ribosomal subunit	5	-0.720641167372091	-1.34929898761258	0.112540192926045	0.699981233344593	0.668673711076475	527	tags=80%, list=17%, signal=66%	MRPS2/MRPS27/MRPS34/MRPS18B
GO:0005763	CC	GO:0005763	mitochondrial small ribosomal subunit	5	-0.720641167372091	-1.34929898761258	0.112540192926045	0.699981233344593	0.668673711076475	527	tags=80%, list=17%, signal=66%	MRPS2/MRPS27/MRPS34/MRPS18B
GO:0071868	BP	GO:0071868	cellular response to monoamine stimulus	16	0.468924233120201	1.34686186452264	0.11280487804878	0.699981233344593	0.668673711076475	327	tags=29%, list=11%, signal=26%	FLNA/TGM2/SULT1A3/GNB1/FLNA
GO:0071870	BP	GO:0071870	cellular response to catecholamine stimulus	16	0.468924233120201	1.34686186452264	0.11280487804878	0.699981233344593	0.668673711076475	327	tags=29%, list=11%, signal=26%	FLNA/TGM2/SULT1A3/GNB1/FLNA
GO:1903351	BP	GO:1903351	cellular response to dopamine	16	0.468924233120201	1.34686186452264	0.11280487804878	0.699981233344593	0.668673711076475	327	tags=29%, list=11%, signal=26%	FLNA/TGM2/SULT1A3/GNB1/FLNA
GO:0042147	BP	GO:0042147	retrograde transport, endosome to Golgi	28	-0.454520675440927	-1.33980940294405	0.112759643916914	0.699981233344593	0.668673711076475	617	tags=36%, list=20%, signal=29%	SNX2/EHD3/ARFIP1/ANKFY1/VTI1A/SNX12/VPS51/TBC1D5/EIPR1/GBF1
GO:0097190	BP	GO:0097190	apoptotic signaling pathway	150	-0.326811166513975	-1.24400119292504	0.1125	0.699981233344593	0.668673711076475	400	tags=19%, list=13%, signal=17%	DDX47/FADD/CSNK2A1/CUL1/DNAJC10/CTTN/RPL26/MSH2/CASP3/ACAA2/APAF1/BAK1/ATP5IF1/CAV1/DAXX/TXNDC12/USP47/NCK1/HIP1R/FGG/BCAP31/ERP29/MIF/PARP2/RPS27L/FGB/PRKDC/FGA
GO:0032956	BP	GO:0032956	regulation of actin cytoskeleton organization	106	0.282201282146987	1.23846451889189	0.113212977677133	0.699981233344593	0.668673711076475	472	tags=22%, list=15%, signal=19%	FLNA/TPM1/CDC42/DSTN/ALOX15/TWF1/COTL1/CFL2/CAPG/APOA1/SYNPO2/WASHC5/TWF2/ACTG1/CD47/FLNA/TMOD3/ARPC5/SORBS3/SVIL/NCKAP1/SH3BP1/ACTN2/KANK2
GO:0016740	MF	GO:0016740	transferase activity	356	-0.293704918839134	-1.19163640331748	0.112869198312236	0.699981233344593	0.668673711076475	610	tags=21%, list=20%, signal=19%	SRM/LTBP4/WNK1/ADPGK/PIP4K2A/PRMT3/GNPTAB/MTPAP/CDK1/SPTLC1/SEPHS2/CDS2/LMO7/CDK5/PDGFRB/UCKL1/UAP1L1/POGLUT1/SHMT1/MBOAT7/PRMT9/MRM1/PPIL2/CSNK2A1/ALDH18A1/HS2ST1/FBXO6/CCNK/MCM3AP/KHK/BSPRY/EFEMP1/UAP1/GNPAT/ACAA2/PPAT/BRD2/GRK2/GBA2/F13A1/MTOR/STK38L/PRPSAP2/POLD1/ERBB2/SHARPIN/POLR2E/RPAP1/PRKCB/UBR5/DPH1/TSTD1/RNF20/MKRN2/TRNT1/POLR2K/ARAF/PDXK/COMT/DNMT1/PPP1R9B/PRPS1/EPB42/MAP4K1/PRPS2/ILV…
GO:0030492	MF	GO:0030492	hemoglobin binding	4	-0.756021925759636	-1.3397260275033	0.113486842105263	0.700880606184723	0.669532858359292	420	tags=80%, list=14%, signal=69%	SLC4A1/HP/HBB/HBB
GO:0006308	BP	GO:0006308	DNA catabolic process	5	-0.719793192111827	-1.347711273488	0.114147909967846	0.703321283777037	0.67186437364206	292	tags=60%, list=9%, signal=54%	AIFM1/EXOG/APAF1
GO:0001736	BP	GO:0001736	establishment of planar polarity	5	-0.719204661845893	-1.34660933353791	0.114147909967846	0.703321283777037	0.67186437364206	365	tags=40%, list=12%, signal=35%	EXOC5/ASTN2
GO:0007164	BP	GO:0007164	establishment of tissue polarity	5	-0.719204661845893	-1.34660933353791	0.114147909967846	0.703321283777037	0.67186437364206	365	tags=40%, list=12%, signal=35%	EXOC5/ASTN2
GO:0016185	BP	GO:0016185	synaptic vesicle budding from presynaptic endocytic zone membrane	5	0.701645434574535	1.41478869767908	0.115789473684211	0.703929707209029	0.672445584587148	456	tags=33%, list=15%, signal=28%	SLC2A4/PICALM
GO:0051220	BP	GO:0051220	cytoplasmic sequestering of protein	5	0.697258855751733	1.40594365738641	0.115789473684211	0.703929707209029	0.672445584587148	327	tags=33%, list=11%, signal=30%	FLNA/FLNA
GO:0002548	BP	GO:0002548	monocyte chemotaxis	9	0.588950911520911	1.38088764404624	0.115492957746479	0.703929707209029	0.672445584587148	87	tags=22%, list=3%, signal=22%	S100A12/ANXA1
GO:0045211	CC	GO:0045211	postsynaptic membrane	26	0.41626375416949	1.37147760403047	0.115264797507788	0.703929707209029	0.672445584587148	470	tags=33%, list=15%, signal=28%	ITGA5/FMR1/KCTD12/SNTA1/FARP1/DMD/PICALM/TMUB1/ACTN2
GO:1904035	BP	GO:1904035	regulation of epithelial cell apoptotic process	21	-0.494353111577579	-1.36634535317975	0.114658925979681	0.703929707209029	0.672445584587148	313	tags=19%, list=10%, signal=17%	SRSF6/FGG/FGB/FGA
GO:0035771	BP	GO:0035771	interleukin-4-mediated signaling pathway	3	0.784227153877598	1.36135809401939	0.11566265060241	0.703929707209029	0.672445584587148	309	tags=67%, list=10%, signal=60%	CD300LF/STAT6
GO:0001833	BP	GO:0001833	inner cell mass cell proliferation	3	0.784176919091976	1.36127089029063	0.11566265060241	0.703929707209029	0.672445584587148	344	tags=67%, list=11%, signal=59%	PELO/SBDS
GO:1901879	BP	GO:1901879	regulation of protein depolymerization	38	0.374505327381834	1.33988714937161	0.114864864864865	0.703929707209029	0.672445584587148	611	tags=37%, list=20%, signal=30%	DSTN/TWF1/CFL2/CAPG/MAP1B/TWF2/TMOD3/SVIL/SH3BP1/ACTN2/ADD1/LMOD1/FLII/CAPZB
GO:0021591	BP	GO:0021591	ventricular system development	4	-0.755392872845378	-1.33861129983047	0.115131578947368	0.703929707209029	0.672445584587148	650	tags=75%, list=21%, signal=59%	CORO1C/MBOAT7/UCHL5
GO:0050729	BP	GO:0050729	positive regulation of inflammatory response	32	0.380319003638532	1.31702715028156	0.114649681528662	0.703929707209029	0.672445584587148	172	tags=16%, list=6%, signal=15%	S100A12/S100A9/DDT/LGALS1/SNX4
GO:0004748	MF	GO:0004748	ribonucleoside-diphosphate reductase activity, thioredoxin disulfide as acceptor	3	-0.796549479166667	-1.31303975979213	0.115843270868825	0.703929707209029	0.672445584587148	629	tags=100%, list=20%, signal=80%	RRM1/RRM2
GO:0005971	CC	GO:0005971	ribonucleoside-diphosphate reductase complex	3	-0.796549479166667	-1.31303975979213	0.115843270868825	0.703929707209029	0.672445584587148	629	tags=100%, list=20%, signal=80%	RRM1/RRM2
GO:0016725	MF	GO:0016725	oxidoreductase activity, acting on CH or CH2 groups	3	-0.796549479166667	-1.31303975979213	0.115843270868825	0.703929707209029	0.672445584587148	629	tags=100%, list=20%, signal=80%	RRM1/RRM2
GO:0016728	MF	GO:0016728	oxidoreductase activity, acting on CH or CH2 groups, disulfide as acceptor	3	-0.796549479166667	-1.31303975979213	0.115843270868825	0.703929707209029	0.672445584587148	629	tags=100%, list=20%, signal=80%	RRM1/RRM2
GO:0061731	MF	GO:0061731	ribonucleoside-diphosphate reductase activity	3	-0.796549479166667	-1.31303975979213	0.115843270868825	0.703929707209029	0.672445584587148	629	tags=100%, list=20%, signal=80%	RRM1/RRM2
GO:0030042	BP	GO:0030042	actin filament depolymerization	32	0.377477590412322	1.30718746746717	0.114649681528662	0.703929707209029	0.672445584587148	611	tags=44%, list=20%, signal=35%	DSTN/TWF1/CFL2/CAPG/CFL1/TWF2/TMOD3/SVIL/SH3BP1/ACTN2/ADD1/LMOD1/FLII/CAPZB
GO:0051046	BP	GO:0051046	regulation of secretion	124	-0.339810375539762	-1.25948433391137	0.115606936416185	0.703929707209029	0.672445584587148	509	tags=22%, list=17%, signal=19%	CDK5/LAMP1/CELA2A/GIT1/GNA11/HNF4A/SEPTIN1/CHGA/EIPR1/GRK2/SLC25A22/CD2AP/CD200/PRKCB/RAB3D/HIP1R/MYO18A/FGG/ERP29/LLGL2/MIF/HGS/MYO6/FGB/AP1G1/VAMP8/FGA
GO:0006979	BP	GO:0006979	response to oxidative stress	102	0.276092589056611	1.19120748455952	0.11502434698427	0.703929707209029	0.672445584587148	430	tags=16%, list=14%, signal=15%	RHOB/TPM1/MMP9/MPO/NME2/SOD3/ATOX1/PRDX6/IDH1/COL1A1/STAT6/FABP1/GPX1/COL6A1/ATP2A2/SIRPA/CRYAB
GO:0001878	BP	GO:0001878	response to yeast	4	0.744836165459942	1.39661777303716	0.116751269035533	0.705816330620916	0.674247826444694	92	tags=50%, list=3%, signal=49%	ELANE/MPO
GO:0005310	MF	GO:0005310	dicarboxylic acid transmembrane transporter activity	4	-0.753339272045697	-1.33497216934008	0.116776315789474	0.705816330620916	0.674247826444694	305	tags=50%, list=10%, signal=45%	SLC25A10/SLC25A22
GO:0015556	MF	GO:0015556	C4-dicarboxylate transmembrane transporter activity	4	-0.753339272045697	-1.33497216934008	0.116776315789474	0.705816330620916	0.674247826444694	305	tags=50%, list=10%, signal=45%	SLC25A10/SLC25A22
GO:0035473	MF	GO:0035473	lipase binding	4	-0.75243582117033	-1.3333711884544	0.116776315789474	0.705816330620916	0.674247826444694	368	tags=75%, list=12%, signal=66%	FAF2/PLIN5/APOB
GO:0004032	MF	GO:0004032	alditol:NADP+ 1-oxidoreductase activity	4	-0.751015196872758	-1.33085373852086	0.116776315789474	0.705816330620916	0.674247826444694	721	tags=75%, list=23%, signal=57%	AKR1B1/AKR1E2/AKR7A2
GO:0004842	MF	GO:0004842	ubiquitin-protein transferase activity	47	0.334765450141188	1.26780525176343	0.116541353383459	0.705816330620916	0.674247826444694	269	tags=19%, list=9%, signal=18%	CUL9/CDC42/HERC6/UBE2L3/UBE4A/TRIM21/UBE2K/HERC1/PRPF19
GO:0050821	BP	GO:0050821	protein stabilization	73	0.311873975106048	1.26306802897543	0.116279069767442	0.705816330620916	0.674247826444694	430	tags=21%, list=14%, signal=19%	FLNA/CREB1/PARVA/CLU/APOA1/WFS1/BAG3/ATP1B1/PFDN2/CCT3/PHB1/FLNA/GRN/RPL11/PDCL3/CRYAB
GO:0097035	BP	GO:0097035	regulation of membrane lipid distribution	7	-0.653594799040746	-1.36145021517542	0.116903633491311	0.705845729660018	0.674275910575585	420	tags=71%, list=14%, signal=62%	PRKCD/ABCB1/SLC4A1/PLSCR1/GBA2
GO:0032588	CC	GO:0032588	trans-Golgi network membrane	24	-0.475492628313195	-1.35215041418514	0.116959064327485	0.705845729660018	0.674275910575585	571	tags=29%, list=19%, signal=24%	ARFIP1/VTI1A/VPS51/COG5/SCAMP2/RAB43/AP1G1
GO:1902806	BP	GO:1902806	regulation of cell cycle G1/S phase transition	39	-0.416308986408427	-1.31098187038782	0.117066290550071	0.705953368089642	0.674378734743952	766	tags=38%, list=25%, signal=29%	MEPCE/CDC73/DDRGK1/PLCG2/SDE2/RDX/ARID1A/RPL26/SMARCD1/RRM1/CRLF3/RRM2/RPS27L/EIF4G1/PRKDC
GO:0042742	BP	GO:0042742	defense response to bacterium	60	0.318727592633441	1.26893273009312	0.117154811715481	0.705953368089642	0.674378734743952	146	tags=15%, list=5%, signal=15%	S100A12/S100A9/FCN2/AZU1/ELANE/LTF/MPO/LCN2/ISG15
GO:0030957	MF	GO:0030957	Tat protein binding	5	0.69601041428209	1.4034263162994	0.118421052631579	0.706337307994945	0.674745502464399	910	tags=80%, list=30%, signal=56%	SMARCB1/DNAJA1/SMARCA4/NPM1
GO:0019789	MF	GO:0019789	SUMO transferase activity	5	0.695779517179685	1.40296073839536	0.118421052631579	0.706337307994945	0.674745502464399	190	tags=20%, list=6%, signal=19%	HDAC7
GO:0008429	MF	GO:0008429	phosphatidylethanolamine binding	5	0.693944558791295	1.39926075224755	0.118421052631579	0.706337307994945	0.674745502464399	834	tags=80%, list=27%, signal=58%	PEBP1/ESYT2/GABARAPL2/ESYT1
GO:0043271	BP	GO:0043271	negative regulation of monoatomic ion transport	22	0.438892909772817	1.38381070604937	0.119122257053292	0.706337307994945	0.674745502464399	503	tags=36%, list=16%, signal=31%	MMP9/YWHAQ/FMR1/SPINK1/ATP1A2/ACTN2/CLIC2/CALM3
GO:1900151	BP	GO:1900151	regulation of nuclear-transcribed mRNA catabolic process, deadenylation-dependent decay	9	-0.608372527999768	-1.37023823098867	0.117465224111283	0.706337307994945	0.674745502464399	698	tags=44%, list=23%, signal=34%	SYNCRIP/CSDE1/HNRNPD/CNOT1
GO:0003684	MF	GO:0003684	damaged DNA binding	23	-0.483190537860247	-1.36220542953866	0.11849710982659	0.706337307994945	0.674745502464399	502	tags=30%, list=16%, signal=26%	SDE2/XPC/FEN1/MSH2/POLD1/PARP2/ERCC4
GO:0033120	BP	GO:0033120	positive regulation of RNA splicing	23	-0.482564565231356	-1.36044069441451	0.11849710982659	0.706337307994945	0.674745502464399	349	tags=26%, list=11%, signal=23%	U2AF2/RBMX/TRA2B/SNRNP70/RBM22/RBM3
GO:0008408	MF	GO:0008408	3'-5' exonuclease activity	12	-0.563794984851503	-1.35986744734035	0.118380062305296	0.706337307994945	0.674745502464399	550	tags=67%, list=18%, signal=55%	DIS3L2/DIS3/EXOSC4/CNOT2/CNOT1/RAD50/XRN2/POLD1
GO:0030247	MF	GO:0030247	polysaccharide binding	3	0.78307155280982	1.35935205934015	0.118072289156627	0.706337307994945	0.674745502464399	543	tags=67%, list=18%, signal=55%	FCN2/AGL
GO:0030032	BP	GO:0030032	lamellipodium assembly	25	0.41315216214338	1.35060964953601	0.118012422360248	0.706337307994945	0.674745502464399	317	tags=24%, list=10%, signal=22%	CDC42/TWF1/VCL/ABLIM1/TWF2/ACTR2
GO:0001055	MF	GO:0001055	RNA polymerase II activity	5	-0.715763623396493	-1.34016647416999	0.118971061093248	0.706337307994945	0.674745502464399	196	tags=60%, list=6%, signal=56%	POLR2A/POLR2E/POLR2K
GO:0005665	CC	GO:0005665	RNA polymerase II, core complex	5	-0.715763623396493	-1.34016647416999	0.118971061093248	0.706337307994945	0.674745502464399	196	tags=60%, list=6%, signal=56%	POLR2A/POLR2E/POLR2K
GO:1901796	BP	GO:1901796	regulation of signal transduction by p53 class mediator	25	-0.46708345006415	-1.33923964387345	0.117647058823529	0.706337307994945	0.674745502464399	315	tags=40%, list=10%, signal=36%	NOP2/PRMT5/BOP1/KDM1A/RRM2B/RPL23/RPL26/MTOR/MIF/TP53RK
GO:0034212	MF	GO:0034212	peptide N-acetyltransferase activity	5	-0.714989577078226	-1.33871718156656	0.118971061093248	0.706337307994945	0.674745502464399	320	tags=40%, list=10%, signal=36%	MCM3AP/HAT1
GO:0061733	MF	GO:0061733	peptide-lysine-N-acetyltransferase activity	5	-0.714989577078226	-1.33871718156656	0.118971061093248	0.706337307994945	0.674745502464399	320	tags=40%, list=10%, signal=36%	MCM3AP/HAT1
GO:1903035	BP	GO:1903035	negative regulation of response to wounding	29	-0.44803681687242	-1.33065625504581	0.118518518518519	0.706337307994945	0.674745502464399	939	tags=45%, list=31%, signal=31%	EPPK1/CLASP2/PTPN6/SLC12A2/SERPINF2/APOE/PLG/GIT1/SERPING1/KNG1/FGG/FGB/FGA
GO:0071715	BP	GO:0071715	icosanoid transport	4	-0.75071758611823	-1.33032635054397	0.118421052631579	0.706337307994945	0.674745502464399	201	tags=75%, list=7%, signal=70%	SYK/ABCC3/MIF
GO:0051592	BP	GO:0051592	response to calcium ion	31	-0.440615438073826	-1.32168473553627	0.117820324005891	0.706337307994945	0.674745502464399	346	tags=26%, list=11%, signal=23%	STIM1/CHP2/CPNE1/CAV1/MTTP/FGG/FGB/FGA
GO:0022406	BP	GO:0022406	membrane docking	33	-0.431925683896426	-1.32132723442051	0.119013062409289	0.706337307994945	0.674745502464399	482	tags=27%, list=16%, signal=23%	STX7/CHP1/EXOC2/EXOC5/VAPB/RAB3D/CAV2/VAMP8/PEX16
GO:0005985	BP	GO:0005985	sucrose metabolic process	3	-0.796144286038778	-1.31237183557496	0.117546848381601	0.706337307994945	0.674745502464399	597	tags=100%, list=19%, signal=81%	FBP1/SI
GO:0019787	MF	GO:0019787	ubiquitin-like protein transferase activity	54	0.334663438632906	1.29122149181046	0.119176619884732	0.706337307994945	0.674745502464399	269	tags=19%, list=9%, signal=17%	CUL9/CDC42/HERC6/UBE2L3/UBE4A/HDAC7/TRIM21/UBE2K/HERC1/PRPF19
GO:0043412	BP	GO:0043412	macromolecule modification	559	-0.280684595030763	-1.15940915227825	0.118852459016393	0.706337307994945	0.674745502464399	415	tags=15%, list=13%, signal=16%	USP24/MRM1/NIBAN1/FBXO28/SNRPD3/UBXN1/PPIL2/CSNK2A1/EIPR1/RASIP1/CUL1/DNAJC10/LRRC59/VIRMA/BRCC3/SLC51B/U2AF2/PIN1/FBXO6/CCNK/FBLN1/RPL23/VPS33B/RAD50/AKAP9/BSPRY/EFEMP1/KEAP1/DNAJB11/BRD2/PLAA/GRK2/ATG4B/F13A1/MTOR/PDXP/STK38L/BAK1/FKBP4/METAP2/ERBB2/SHARPIN/TPP2/CAV1/UCHL5/DAXX/PRKCB/DERL1/USP47/UBR5/SNRPG/DPH1/RNF20/DOCK7/MKRN2/NCK1/ABHD12/PPT2/PIGT/DCUN1D4/ARAF/PLXNB2/DNMT1/PPP1R9B/PDP1/ERP29…
GO:0070061	MF	GO:0070061	fructose binding	4	0.741599802333323	1.39054937508303	0.119289340101523	0.706477763466929	0.674879675892512	236	tags=40%, list=8%, signal=37%	ALDOA/ALDOB
GO:0010984	BP	GO:0010984	regulation of lipoprotein particle clearance	8	0.608990959528376	1.3970974785014	0.119565217391304	0.706529832626501	0.67492941619483	514	tags=38%, list=17%, signal=31%	GPLD1/APOC3/HNRNPK
GO:0002698	BP	GO:0002698	negative regulation of immune effector process	24	0.420054585493239	1.36304816647343	0.119496855345912	0.706529832626501	0.67492941619483	509	tags=33%, list=17%, signal=28%	ARG1/ANXA1/APOA1/FGL2/LGALS9/GRN/PGLYRP1/TGFB1
GO:0014902	BP	GO:0014902	myotube differentiation	24	0.417369650394933	1.3543357372101	0.119496855345912	0.706529832626501	0.67492941619483	863	tags=62%, list=28%, signal=45%	ACTA1/CD9/TMEM119/GPX1/MAPK14/COL6A1/NIBAN2/MYH9/CAPN2/EHD2/ITGB1/PLD3/DMPK/MMP14/PTGFRN
GO:1902235	BP	GO:1902235	regulation of endoplasmic reticulum stress-induced intrinsic apoptotic signaling pathway	8	-0.631019375136167	-1.36860147514355	0.1198738170347	0.70685616117445	0.675241149296793	192	tags=38%, list=6%, signal=35%	TXNDC12/NCK1/ERP29
GO:0006972	BP	GO:0006972	hyperosmotic response	8	-0.631012570789766	-1.368586717374	0.1198738170347	0.70685616117445	0.675241149296793	987	tags=75%, list=32%, signal=51%	XRCC5/SLC12A2/AKR1B1/ARHGEF2/WNK1/FBP1
GO:0030894	CC	GO:0030894	replisome	7	-0.651310808737494	-1.35669262057035	0.120063191153239	0.70685616117445	0.675241149296793	470	tags=57%, list=15%, signal=49%	CDC5L/MCM3/POLD1/BCAS2
GO:0015294	MF	GO:0015294	solute:monoatomic cation symporter activity	6	-0.688309849786176	-1.35084401384915	0.119935170178282	0.70685616117445	0.675241149296793	255	tags=67%, list=8%, signal=61%	SLC12A2/SLC25A22/SLC4A4/SLC12A9
GO:0031264	CC	GO:0031264	death-inducing signaling complex	4	-0.750282609346267	-1.32955553995912	0.120065789473684	0.70685616117445	0.675241149296793	391	tags=100%, list=13%, signal=87%	FAF1/FADD/CASP3
GO:0140492	MF	GO:0140492	metal-dependent deubiquitinase activity	5	0.693603101523944	1.39857224226974	0.121052631578947	0.708255243195002	0.676577655651847	439	tags=50%, list=14%, signal=43%	COPS5/EIF3H/BRCC3
GO:0060350	BP	GO:0060350	endochondral bone morphogenesis	8	0.604222480508418	1.38615802215836	0.122282608695652	0.708255243195002	0.676577655651847	367	tags=62%, list=12%, signal=55%	COL2A1/COL3A1/COL1A1/TMEM119/SERPINH1
GO:0014033	BP	GO:0014033	neural crest cell differentiation	10	0.558733212663391	1.37257156518875	0.122222222222222	0.708255243195002	0.676577655651847	336	tags=30%, list=11%, signal=27%	CDC42/PDCD6/FN1
GO:0070934	BP	GO:0070934	CRD-mediated mRNA stabilization	9	-0.606404526060725	-1.36580569767819	0.120556414219474	0.708255243195002	0.676577655651847	698	tags=44%, list=23%, signal=34%	SYNCRIP/CSDE1/HNRNPD/IGF2BP2
GO:0005980	BP	GO:0005980	glycogen catabolic process	9	0.581927392400033	1.36441990355715	0.12112676056338	0.708255243195002	0.676577655651847	548	tags=44%, list=18%, signal=37%	PYGM/PPP1CA/AGL/PYGL
GO:0043596	CC	GO:0043596	nuclear replication fork	11	-0.579491402961366	-1.36116100454852	0.122641509433962	0.708255243195002	0.676577655651847	470	tags=36%, list=15%, signal=31%	CDC5L/MCM3/POLD1/BCAS2
GO:1990841	MF	GO:1990841	promoter-specific chromatin binding	15	-0.532557503921883	-1.35825812258618	0.121804511278195	0.708255243195002	0.676577655651847	119	tags=27%, list=4%, signal=26%	POLR2A/KDM1A/DNMT1/ERCC4
GO:0004645	MF	GO:0004645	1,4-alpha-oligoglucan phosphorylase activity	3	0.781320797525011	1.35631288266049	0.12289156626506	0.708255243195002	0.676577655651847	548	tags=67%, list=18%, signal=55%	PYGM/PYGL
GO:0008184	MF	GO:0008184	glycogen phosphorylase activity	3	0.781320797525011	1.35631288266049	0.12289156626506	0.708255243195002	0.676577655651847	548	tags=67%, list=18%, signal=55%	PYGM/PYGL
GO:0102250	MF	GO:0102250	linear malto-oligosaccharide phosphorylase activity	3	0.781320797525011	1.35631288266049	0.12289156626506	0.708255243195002	0.676577655651847	548	tags=67%, list=18%, signal=55%	PYGM/PYGL
GO:0102499	MF	GO:0102499	SHG alpha-glucan phosphorylase activity	3	0.781320797525011	1.35631288266049	0.12289156626506	0.708255243195002	0.676577655651847	548	tags=67%, list=18%, signal=55%	PYGM/PYGL
GO:0060218	BP	GO:0060218	hematopoietic stem cell differentiation	6	-0.68460763373209	-1.34357822156651	0.121555915721232	0.708255243195002	0.676577655651847	10	tags=67%, list=0%, signal=67%	XRCC5/EIF2AK2/UFL1/PRKDC
GO:1900024	BP	GO:1900024	regulation of substrate adhesion-dependent cell spreading	29	0.398195760669659	1.34260381305542	0.122324159021407	0.708255243195002	0.676577655651847	114	tags=16%, list=4%, signal=16%	FLNA/CDC42/OLFM4/POSTN/APOA1
GO:0035520	BP	GO:0035520	monoubiquitinated protein deubiquitination	5	-0.71364845152027	-1.33620611303544	0.120578778135048	0.708255243195002	0.676577655651847	183	tags=80%, list=6%, signal=75%	USP15/USP9X/USP7/USP47
GO:0048265	BP	GO:0048265	response to pain	5	-0.712520550994072	-1.33409427831515	0.122186495176849	0.708255243195002	0.676577655651847	241	tags=40%, list=8%, signal=37%	MTOR/VWA1
GO:0009612	BP	GO:0009612	response to mechanical stimulus	39	0.369493409607227	1.32448740420097	0.122866894197952	0.708255243195002	0.676577655651847	437	tags=36%, list=14%, signal=31%	POSTN/ACTA1/MPO/CHI3L1/CNN2/BAG3/MAP1B/GPI/NFKB1/COL1A1/MAPK14/COL6A1/DMD/ATP1A2
GO:0045471	BP	GO:0045471	response to ethanol	31	-0.438142172333111	-1.31426584528876	0.122238586156112	0.708255243195002	0.676577655651847	236	tags=16%, list=8%, signal=15%	BAK1/PRKCB/RPL15/EIF4G1/MYD88
GO:0032331	BP	GO:0032331	negative regulation of chondrocyte differentiation	3	-0.7939453125	-1.3087470266175	0.120954003407155	0.708255243195002	0.676577655651847	637	tags=100%, list=21%, signal=79%	CTNNB1/EFEMP1
GO:0048806	BP	GO:0048806	genitalia development	3	-0.7939453125	-1.3087470266175	0.120954003407155	0.708255243195002	0.676577655651847	637	tags=100%, list=21%, signal=79%	CTNNB1/BAK1
GO:0061037	BP	GO:0061037	negative regulation of cartilage development	3	-0.7939453125	-1.3087470266175	0.120954003407155	0.708255243195002	0.676577655651847	637	tags=100%, list=21%, signal=79%	CTNNB1/EFEMP1
GO:0000243	CC	GO:0000243	commitment complex	3	-0.793662438470691	-1.30828073436923	0.122657580919932	0.708255243195002	0.676577655651847	394	tags=100%, list=13%, signal=87%	SNRPD3/U2AF2
GO:1900026	BP	GO:1900026	positive regulation of substrate adhesion-dependent cell spreading	21	0.414565266531948	1.29507910340956	0.121405750798722	0.708255243195002	0.676577655651847	114	tags=18%, list=4%, signal=18%	FLNA/CDC42/OLFM4/APOA1
GO:0033273	BP	GO:0033273	response to vitamin	21	0.414191609289493	1.2939118187246	0.121405750798722	0.708255243195002	0.676577655651847	489	tags=43%, list=16%, signal=36%	POSTN/SPP1/MAP1B/COL1A1/FABP1/GPX1/FES/KANK2/SOD2
GO:0030705	BP	GO:0030705	cytoskeleton-dependent intracellular transport	43	0.351513489106443	1.29325490739685	0.121428571428571	0.708255243195002	0.676577655651847	202	tags=14%, list=7%, signal=13%	CDC42/HSPB1/BAG3/BLOC1S3/MAP1B/TUBB
GO:0006338	BP	GO:0006338	chromatin remodeling	122	-0.336272275835619	-1.24331502931192	0.121951219512195	0.708255243195002	0.676577655651847	360	tags=16%, list=12%, signal=15%	BRCC3/ARID1A/H2AC18/DDX23/MCM3AP/BRD2/SMARCD1/UCHL5/DAXX/PRKCB/UBR5/RNF20/DNMT1/HAT1/PARP2/BAZ1A/SUPT6H/MYD88/PRKDC/RPS6KA5
GO:1903530	BP	GO:1903530	regulation of secretion by cell	112	-0.339337166878522	-1.23783582418429	0.121605667060213	0.708255243195002	0.676577655651847	509	tags=22%, list=17%, signal=19%	CDK5/LAMP1/CELA2A/GIT1/GNA11/HNF4A/SEPTIN1/CHGA/EIPR1/GRK2/SLC25A22/CD2AP/CD200/PRKCB/RAB3D/MYO18A/FGG/ERP29/LLGL2/MIF/HGS/FGB/AP1G1/VAMP8/FGA
GO:0007249	BP	GO:0007249	canonical NF-kappaB signal transduction	68	0.302871014908455	1.23286786542638	0.12280701754386	0.708255243195002	0.676577655651847	429	tags=23%, list=14%, signal=20%	S100A12/FLNA/LTF/HSPB1/LGALS1/FKBP1A/TRIM21/IKBKG/UBE2V1/S100A4/NFKB1/FLNA/LGALS9/CC2D1A/OPTN/SIRPA
GO:0060090	MF	GO:0060090	molecular adaptor activity	272	-0.300563252911109	-1.19930262842719	0.120559741657696	0.708255243195002	0.676577655651847	736	tags=22%, list=24%, signal=19%	RALY/SCRIB/ZZEF1/LPXN/RBM14/CHD4/AIMP2/EPB41L3/EEF1A1/TRIM25/GCN1/FXR1/PTPN11/TAB1/DCAF7/DHRS7B/WNK1/PDZK1/CNOT2/CTBP1/NHERF2/VTI1A/STX7/CTNNB1/G3BP2/TAF15/DDX17/NCOA5/SLC4A1/SEPTIN1/FADD/HNRNPA2B1/CUL1/XPC/ARID1A/CNOT1/SRSF2/MYCBP/RAD50/AKAP9/KEAP1/TRIP13/SMARCD1/FKBP4/SHARPIN/CAV1/DAXX/PRKCB/RNF20/NCK1/TDP2/IGF2BP2/HIP1R/CAV2/SYNE3/ALYREF/AP1G1/VAMP8/EIF4G1/MYD88/ALKBH5
GO:0051128	BP	GO:0051128	regulation of cellular component organization	572	0.203962943814377	1.08379524676309	0.121135943632235	0.708255243195002	0.676577655651847	567	tags=22%, list=18%, signal=22%	RHOB/CUL9/FLNA/S100A9/TPM1/CDC42/DSTN/LMNA/INF2/FCN2/PRTN3/AZU1/CLIP1/ALOX15/CD177/MMP9/ANXA1/TWF1/COTL1/CFL2/CAPG/AHSG/CLIC4/CENPV/CFL1/TGM2/CLU/CNN2/SLC2A4/APOA1/DRG1/SYNPO2/LAMC1/GFAP/ISG15/NME2/VCL/CD300LF/MIEN1/SNX4/SPP1/PFDN2/MAP1B/COL14A1/TUBB/CHMP4B/WASHC5/VPS33A/TWF2/YWHAH/VAT1/TOP2A/SARM1/NEXN/RAP1B/CDKN2C/VPS13D/MAP2K2/APOC3/PPT1/FMR1/ACTG1/CCT3/DPYSL3/SAR1B/PHB1/ACTR2/ATXN2/GPX1/CD47/…
GO:1904505	BP	GO:1904505	regulation of telomere maintenance in response to DNA damage	6	-0.684048400851141	-1.34248069784255	0.123176661264182	0.709383152244227	0.677655117580502	198	tags=50%, list=6%, signal=47%	XRCC1/UCHL5/ERCC4
GO:0034762	BP	GO:0034762	regulation of transmembrane transport	79	0.302257301930833	1.25189824570206	0.1239438646861	0.71328390873741	0.681381407938087	503	tags=29%, list=16%, signal=25%	FLNA/SLMAP/SORBS1/MMP9/SORBS1/ATP1B1/STOM/FKBP1A/YWHAH/NIPSNAP2/TCIRG1/YWHAQ/FMR1/FLNA/STXBP3/SNTA1/GPD1L/ATP2B4/MAPK14/DMD/ATP1A2/ACTN2/CLIC2/CALM3
GO:0046967	BP	GO:0046967	cytosol to endoplasmic reticulum transport	4	0.739727311105088	1.38703832842542	0.124365482233503	0.715191642757302	0.68320381620571	671	tags=75%, list=22%, signal=59%	ATP2A2/TAP1/TAP2
GO:0071295	BP	GO:0071295	cellular response to vitamin	6	0.656582197345847	1.39831819010282	0.124675324675325	0.715935873099404	0.683914759929689	472	tags=67%, list=15%, signal=57%	POSTN/COL1A1/FES/KANK2
GO:0015850	BP	GO:0015850	organic hydroxy compound transport	43	-0.402817084317514	-1.28967892622837	0.124653739612188	0.715935873099404	0.683914759929689	637	tags=40%, list=21%, signal=32%	PTPN11/NPC1L1/APOE/PIP4K2A/MFSD10/VPS51/CHGA/SLC51B/GRK2/APOB/VAPB/CAV1/ABCC3/ABCD3/PRKCB/MTTP/COMT
GO:0030514	BP	GO:0030514	negative regulation of BMP signaling pathway	4	-0.748240601185897	-1.32593695247163	125	0.716763005780347	0.684704898083359	555	tags=75%, list=18%, signal=62%	SORL1/FBN1/HTRA1
GO:1902644	BP	GO:1902644	tertiary alcohol metabolic process	4	-0.748210531819787	-1.3258836673604	125	0.716763005780347	0.684704898083359	721	tags=75%, list=23%, signal=57%	AKR1B1/H6PD/AKR7A2
GO:0010665	BP	GO:0010665	regulation of cardiac muscle cell apoptotic process	3	0.779296875	1.35279950863682	0.125301204819277	0.717453363236496	0.685364378452521	681	tags=100%, list=22%, signal=78%	ATP2A2/CAPN2/SIRT5
GO:0061299	BP	GO:0061299	retina vasculature morphogenesis in camera-type eye	3	0.778822052570611	1.35197525337573	0.125301204819277	0.717453363236496	0.685364378452521	655	tags=67%, list=21%, signal=53%	CLIC4/COL4A1
GO:0008409	MF	GO:0008409	5'-3' exonuclease activity	5	-0.710396256445004	-1.33011683626185	0.12540192926045	0.717512408515452	0.685420782858697	357	tags=80%, list=12%, signal=71%	CPSF3/FEN1/EXOG/XRN2
GO:1901989	BP	GO:1901989	positive regulation of cell cycle phase transition	22	-0.487373957912035	-1.35641499266937	0.125915080527086	0.71963464296902	0.687448097764071	766	tags=68%, list=25%, signal=52%	RCC2/SIN3A/CPSF3/VPS4B/MEPCE/CDC73/DDRGK1/RRM2B/PLCG2/CDK1/RDX/RRM1/RRM2/CDK4/EIF4G1
GO:0060491	BP	GO:0060491	regulation of cell projection assembly	51	0.326132342266503	1.25490057936651	0.125954198473282	0.71963464296902	0.687448097764071	748	tags=35%, list=24%, signal=27%	CDC42/TWF1/MIEN1/TWF2/FMR1/DPYSL3/ACTR2/MAP4/SEPTIN9/NCKAP1/ARF4/AGRN/CAPZB/CDC42EP5/SRC/EPS8L3/PALM/PFN2
GO:0010959	BP	GO:0010959	regulation of metal ion transport	69	0.310004589948477	1.25180312122194	0.126126126126126	0.720098515781969	0.68789122329448	503	tags=27%, list=16%, signal=23%	FLNA/SLMAP/MYLK/WFS1/ATP1B1/FKBP1A/YWHAH/NIPSNAP2/FMR1/SPINK1/FLNA/SNTA1/GPD1L/ATP2B4/DMD/ATP1A2/ACTN2/CLIC2/CALM3
GO:0031966	CC	GO:0031966	mitochondrial membrane	210	-0.313021558185927	-1.22608105370729	0.12649945474373	0.721192293711378	0.688936080659664	807	tags=28%, list=26%, signal=22%	CKMT1A/LGALS3/PMPCB/NME3/BRI3BP/UQCRB/TOMM7/OGT/SFXN5/SORD/SPG7/NDUFA13/MRPL13/UQCRQ/TIMM9/UQCRC1/APOOL/SFXN1/MRPL2/MTARC2/PGRMC1/ATP5MF/MRPS27/CDS2/ATAD3A/NDUFA4/CISD2/MTCH2/ALDH18A1/SLC25A10/MRPL38/EXOG/MRPS34/GNPAT/SCO2/SLC25A22/MTOR/BAK1/NDUFA10/NDUFA9/ETFDH/NDUFB8/MRPL3/MRPS18B/NDUFS8/AMBP/MRPL37/COX5A/TIMM8A/ARMC1/MRPL43/MRPL40/MTX1/ABCB7/MRPL45/MRPL22/DARS2/MRPL11/MRPL12
GO:0044248	BP	GO:0044248	cellular catabolic process	465	-0.28159003712305	-1.15684909570215	0.126424870466321	0.721192293711378	0.688936080659664	598	tags=20%, list=19%, signal=19%	WNK1/FBP1/ADPGK/PIP4K2A/PPP1R8/PLCG2/CHMP1A/UBQLN1/HNRNPAB/LYPLA2/MTPAP/SORL1/CNOT2/TPP1/GTPBP1/CSDE1/HNRNPD/SPTLC1/VPS37C/PCCA/CDK5/VTI1A/VTA1/NEU1/DHX34/MME/CTSA/TAF15/SHMT1/GIT1/EHHADH/SLC4A1/VPS51/ENO2/CISD2/TBC1D5/CSNK2A1/RASIP1/PLIN5/FEN1/CNOT1/RBM10/CTTN/SUCLG2/GBA3/EXOG/CASP3/RBM8A/KEAP1/NAALADL1/XRN2/ACAA2/PLAA/GBA2/ATG4B/APAF1/APOB/MTOR/PDXP/STK38L/MTREX/ATP5IF1/ELAC2/CRYZ/RRAGB/ETFDH/A…
GO:0007029	BP	GO:0007029	endoplasmic reticulum organization	31	-0.437240047355724	-1.31155980117608	0.126656848306333	0.721571247781089	0.689298085542154	603	tags=32%, list=20%, signal=26%	NCLN/WNK1/RTN1/MIA3/LMAN1/VAPB/CAV2/RTN3/CCDC47/TMED2
GO:0016358	BP	GO:0016358	dendrite development	40	0.365137366701845	1.31402702088726	0.126760563380282	0.721644068139107	0.689367648920025	596	tags=30%, list=19%, signal=25%	CDC42/CFL1/MAP1B/YWHAH/SARM1/FMR1/FARP1/PRKG1/PICALM/DOCK10/CD3E/ARF4
GO:0005583	CC	GO:0005583	fibrillar collagen trimer	8	0.603308832279416	1.38406200477583	0.127717391304348	0.723746849111185	0.691376380424813	832	tags=75%, list=27%, signal=55%	COL2A1/COL3A1/COL1A1/COL28A1/COL5A1/LUM
GO:0098643	CC	GO:0098643	banded collagen fibril	8	0.603308832279416	1.38406200477583	0.127717391304348	0.723746849111185	0.691376380424813	832	tags=75%, list=27%, signal=55%	COL2A1/COL3A1/COL1A1/COL28A1/COL5A1/LUM
GO:0043268	BP	GO:0043268	positive regulation of potassium ion transport	8	0.601163446216529	1.37914023473643	0.127717391304348	0.723746849111185	0.691376380424813	470	tags=44%, list=15%, signal=38%	FLNA/ATP1B1/FLNA/ACTN2
GO:0007191	BP	GO:0007191	adenylate cyclase-activating dopamine receptor signaling pathway	3	0.777233053232511	1.3492168725933	0.127710843373494	0.723746849111185	0.691376380424813	623	tags=67%, list=20%, signal=53%	GNB1/GNAS
GO:0046426	BP	GO:0046426	negative regulation of receptor signaling pathway via JAK-STAT	3	-0.792129851406673	-1.30575440323346	0.127768313458262	0.723746849111185	0.691376380424813	208	tags=67%, list=7%, signal=62%	CAV1/HGS
GO:1904893	BP	GO:1904893	negative regulation of receptor signaling pathway via STAT	3	-0.792129851406673	-1.30575440323346	0.127768313458262	0.723746849111185	0.691376380424813	208	tags=67%, list=7%, signal=62%	CAV1/HGS
GO:0002694	BP	GO:0002694	regulation of leukocyte activation	97	-0.346523909583192	-1.24254500930831	0.127272727272727	0.723746849111185	0.691376380424813	409	tags=22%, list=13%, signal=19%	CD22/FADD/SLC4A2/ARID1A/SPTA1/PLSCR1/MSH2/CASP3/BRD2/SMARCD1/MTOR/BPI/ERBB2/CD200/CAV1/NCK1/MYO18A/MIF/SUPT6H/MYD88/PRKDC
GO:0101003	CC	GO:0101003	ficolin-1-rich granule membrane	22	0.424651293065994	1.33890749337146	0.128526645768025	0.727523153220433	0.694983784684523	561	tags=32%, list=18%, signal=26%	AP2A2/SERPINB10/SLC2A3/TCIRG1/SIRPA/DIAPH1/COPB1
GO:0010972	BP	GO:0010972	negative regulation of G2/M transition of mitotic cell cycle	8	-0.624386823477107	-1.3542163067284	0.129337539432177	0.730030379042499	0.697378871745554	556	tags=67%, list=18%, signal=55%	CDK1/BABAM1/RAD21/BRCC3/RAD50/USP47
GO:1902750	BP	GO:1902750	negative regulation of cell cycle G2/M phase transition	8	-0.624386823477107	-1.3542163067284	0.129337539432177	0.730030379042499	0.697378871745554	556	tags=67%, list=18%, signal=55%	CDK1/BABAM1/RAD21/BRCC3/RAD50/USP47
GO:0006284	BP	GO:0006284	base-excision repair	16	-0.518326103305348	-1.34915800952226	0.129080118694362	0.730030379042499	0.697378871745554	363	tags=31%, list=12%, signal=28%	PARG/FEN1/POLD1/USP47/PARP2
GO:0001701	BP	GO:0001701	in utero embryonic development	68	-0.367343762503927	-1.2554431733398	0.129198966408269	0.730030379042499	0.697378871745554	634	tags=25%, list=21%, signal=20%	DAD1/MAFG/TAB1/CNOT2/RIC8A/RPL13/PLG/CTNNB1/CNOT1/MSH2/KEAP1/SCO2/APOB/RRM2/TMEM231/TMED2/SUPT6H
GO:0070888	MF	GO:0070888	E-box binding	4	0.738647807463996	1.38501418668644	0.129441624365482	0.730098600543331	0.697444041955787	55	tags=25%, list=2%, signal=25%	TCF4
GO:0016538	MF	GO:0016538	cyclin-dependent protein serine/threonine kinase regulator activity	5	-0.706797837659933	-1.32337930440337	0.130225080385852	0.731523754785117	0.698805454419887	341	tags=60%, list=11%, signal=53%	CCNK/CASP3/CDK4
GO:0044346	BP	GO:0044346	fibroblast apoptotic process	4	-0.743909752708276	-1.31826237290066	0.129934210526316	0.731523754785117	0.698805454419887	288	tags=50%, list=9%, signal=45%	CASP3/BAK1
GO:0030198	BP	GO:0030198	extracellular matrix organization	74	0.304331009834449	1.24059873417927	0.130232558139535	0.731523754785117	0.698805454419887	742	tags=40%, list=24%, signal=31%	LOXL2/ELANE/POSTN/MMP9/COL2A1/FMOD/MYH11/LAMC1/GFAP/COL14A1/PBXIP1/COL3A1/COL1A1/SERPINH1/COL15A1/COL6A1/TGFBI/FBLN1/LAMB1/TGFB1/NID1/MYH11/COL28A1/DAG1/COL4A1/LCP1/ERO1A/LAMB2/ITGB1/COL5A1/COL18A1
GO:0043062	BP	GO:0043062	extracellular structure organization	74	0.304331009834449	1.24059873417927	0.130232558139535	0.731523754785117	0.698805454419887	742	tags=40%, list=24%, signal=31%	LOXL2/ELANE/POSTN/MMP9/COL2A1/FMOD/MYH11/LAMC1/GFAP/COL14A1/PBXIP1/COL3A1/COL1A1/SERPINH1/COL15A1/COL6A1/TGFBI/FBLN1/LAMB1/TGFB1/NID1/MYH11/COL28A1/DAG1/COL4A1/LCP1/ERO1A/LAMB2/ITGB1/COL5A1/COL18A1
GO:0045229	BP	GO:0045229	external encapsulating structure organization	74	0.304331009834449	1.24059873417927	0.130232558139535	0.731523754785117	0.698805454419887	742	tags=40%, list=24%, signal=31%	LOXL2/ELANE/POSTN/MMP9/COL2A1/FMOD/MYH11/LAMC1/GFAP/COL14A1/PBXIP1/COL3A1/COL1A1/SERPINH1/COL15A1/COL6A1/TGFBI/FBLN1/LAMB1/TGFB1/NID1/MYH11/COL28A1/DAG1/COL4A1/LCP1/ERO1A/LAMB2/ITGB1/COL5A1/COL18A1
GO:0001503	BP	GO:0001503	ossification	82	0.296585870036182	1.23188141074391	0.130299960311028	0.731523754785117	0.698805454419887	394	tags=24%, list=13%, signal=22%	PDLIM7/LTF/LIMD1/ALOX15/COL2A1/AHSG/ISG15/CLIC1/OSTF1/SPP1/HDAC7/GPLD1/TCIRG1/COL1A1/PHB1/TMEM119/SBDS/PDLIM7/MAPK14/COL6A1
GO:0005740	CC	GO:0005740	mitochondrial envelope	220	-0.309937582509137	-1.21522202563448	0.130339539978094	0.731523754785117	0.698805454419887	807	tags=28%, list=26%, signal=22%	CKMT1A/LGALS3/PMPCB/SUOX/NME3/BRI3BP/UQCRB/TOMM7/OGT/SFXN5/SORD/SPG7/NDUFA13/MRPL13/UQCRQ/TIMM9/UQCRC1/APOOL/SFXN1/MRPL2/MTARC2/PGRMC1/ATP5MF/MRPS27/CDS2/ATAD3A/NDUFA4/CIAPIN1/CISD2/MTCH2/ALDH18A1/SLC25A10/MRPL38/EXOG/MRPS34/GNPAT/SCO2/SLC25A22/MTOR/BAK1/NDUFA10/NDUFA9/ETFDH/NDUFB8/MRPL3/MRPS18B/NDUFS8/AMBP/MRPL37/COX5A/TIMM8A/ARMC1/MRPL43/MRPL40/MTX1/ABCB7/MRPL45/MRPL22/DARS2/MRPL11/MRPL12
GO:1990874	BP	GO:1990874	vascular associated smooth muscle cell proliferation	15	0.476057790013207	1.34313067103541	0.130563798219585	0.731568667015599	0.698848357895578	82	tags=19%, list=3%, signal=18%	TPM1/CNN1/MMP9
GO:0000725	BP	GO:0000725	recombinational repair	33	-0.427108916658561	-1.30659200109092	0.130624092888244	0.731568667015599	0.698848357895578	1068	tags=58%, list=35%, signal=38%	PPP4C/SFPQ/XRCC5/MCM6/PSMD14/FUS/HTATSF1/XRCC1/MCM7/KDM1A/SMC5/CHD4/RECQL/SMCHD1/RAD21/MCM3/FEN1/MCM4/ERCC4
GO:0007041	BP	GO:0007041	lysosomal transport	41	0.355487195441301	1.29901339761229	0.130584192439863	0.731568667015599	0.698848357895578	217	tags=12%, list=7%, signal=11%	RHOB/CLU/RAB12/CHMP4B/VPS33A
GO:0001508	BP	GO:0001508	action potential	29	0.390956479318967	1.31819499783129	0.131498470948012	0.735946308493248	0.703030203969701	503	tags=40%, list=16%, signal=34%	FLNA/SLMAP/ATP1B1/YWHAH/FMR1/FLNA/SNTA1/GPD1L/DMD/ATP2A2/ATP1A2/CALM3
GO:0008156	BP	GO:0008156	negative regulation of DNA replication	4	0.729473961392621	1.367812609931	0.131979695431472	0.736044176348674	0.703123694564827	240	tags=50%, list=8%, signal=46%	S100A11/SLFN11
GO:0051280	BP	GO:0051280	negative regulation of release of sequestered calcium ion into cytosol	4	0.72775239983012	1.36458456652083	0.131979695431472	0.736044176348674	0.703123694564827	714	tags=75%, list=23%, signal=58%	CLIC2/CALM3/SRI
GO:0051284	BP	GO:0051284	positive regulation of sequestering of calcium ion	4	0.72775239983012	1.36458456652083	0.131979695431472	0.736044176348674	0.703123694564827	714	tags=75%, list=23%, signal=58%	CLIC2/CALM3/SRI
GO:0060315	BP	GO:0060315	negative regulation of ryanodine-sensitive calcium-release channel activity	4	0.72775239983012	1.36458456652083	0.131979695431472	0.736044176348674	0.703123694564827	714	tags=75%, list=23%, signal=58%	CLIC2/CALM3/SRI
GO:1903036	BP	GO:1903036	positive regulation of response to wounding	22	0.416905874272388	1.31448651683991	0.13166144200627	0.736044176348674	0.703123694564827	361	tags=26%, list=12%, signal=23%	FLNA/MYLK/ANXA1/ACTG1/FLNA/GRN
GO:0009411	BP	GO:0009411	response to UV	36	-0.417890487355894	-1.30038541367349	0.132102272727273	0.736210418794689	0.703282501612817	502	tags=32%, list=16%, signal=27%	SDE2/MME/XPC/FEN1/RPL26/MSH2/CASP3/BAK1/POLD1/USP47/MFAP4/ERCC4
GO:0022625	CC	GO:0022625	cytosolic large ribosomal subunit	41	-0.403435430538505	-1.27339303479498	0.132208157524613	0.736283465344092	0.703352281065385	513	tags=27%, list=17%, signal=23%	RPL31/RPL13/RPL35/RPL3/RPL4/RPL23/RPL26/RPL19/RPL15/RPL32/RPL26L1
GO:0030859	BP	GO:0030859	polarized epithelial cell differentiation	8	0.599654226235237	1.37567790512812	0.133152173913043	0.737915958222006	0.704911758689899	490	tags=38%, list=16%, signal=32%	CDC42/SH3BP1/RAB10
GO:0002793	BP	GO:0002793	positive regulation of peptide secretion	24	-0.46591929101169	-1.32492687542433	0.133040935672515	0.737915958222006	0.704911758689899	189	tags=21%, list=6%, signal=20%	GNA11/PRKCB/FGG/FGB/FGA
GO:0140013	BP	GO:0140013	meiotic nuclear division	19	-0.491833179387457	-1.32163263591882	0.132743362831858	0.737915958222006	0.704911758689899	468	tags=42%, list=15%, signal=36%	SMC2/RAD21/SEPTIN1/TOP2B/RAD50/TRIP13/SMC4/ERCC4
GO:0016209	MF	GO:0016209	antioxidant activity	39	0.363983315538198	1.30473590119541	0.133105802047782	0.737915958222006	0.704911758689899	372	tags=22%, list=12%, signal=20%	S100A9/MPO/ALB/SOD3/PRDX6/FABP1/GPX1/MGST3/NXN
GO:0033198	BP	GO:0033198	response to ATP	3	-0.790983655131533	-1.30386500235989	0.132879045996593	0.737915958222006	0.704911758689899	356	tags=67%, list=12%, signal=59%	TOP2B/PDXP
GO:0120103	CC	GO:0120103	centriolar subdistal appendage	3	-0.789670293933982	-1.30170004523361	0.132879045996593	0.737915958222006	0.704911758689899	539	tags=67%, list=18%, signal=55%	CEP170/KIF2A
GO:0008238	MF	GO:0008238	exopeptidase activity	34	-0.420836189709583	-1.29176647839858	0.13265306122449	0.737915958222006	0.704911758689899	636	tags=32%, list=21%, signal=26%	CTSZ/DPP7/CPD/TPP1/MME/CTSA/DNPEP/NAALADL1/XPNPEP2/METAP2/TPP2
GO:0140212	BP	GO:0140212	regulation of long-chain fatty acid import into cell	5	-0.703368881641637	-1.31695906768427	0.133440514469453	0.738353275517914	0.705329516431454	402	tags=40%, list=13%, signal=35%	EPRS1/AKT2
GO:0170035	BP	GO:0170035	L-amino acid catabolic process	20	0.414277935280129	1.28907657591966	0.133540372670807	0.738353275517914	0.705329516431454	5	tags=5%, list=0%, signal=5%	ARG1
GO:0170040	BP	GO:0170040	proteinogenic amino acid catabolic process	20	0.414277935280129	1.28907657591966	0.133540372670807	0.738353275517914	0.705329516431454	5	tags=5%, list=0%, signal=5%	ARG1
GO:0017157	BP	GO:0017157	regulation of exocytosis	49	-0.384974847569257	-1.26449182874073	0.133603238866397	0.738353275517914	0.705329516431454	189	tags=16%, list=6%, signal=16%	PRKCB/RAB3D/FGG/HGS/FGB/AP1G1/VAMP8/FGA
GO:0016605	CC	GO:0016605	PML body	15	-0.522691005673282	-1.33309417073318	0.133834586466165	0.739117103824279	0.70605918157662	740	tags=47%, list=24%, signal=36%	SMC5/CHD3/CSNK2A1/SP140/MTOR/DAXX/TDP2
GO:0060142	BP	GO:0060142	regulation of syncytium formation by plasma membrane fusion	6	0.651799383110788	1.38813226643356	0.135064935064935	0.740019093714615	0.706920828858853	630	tags=50%, list=20%, signal=40%	MAPK14/CAPN2/EHD2
GO:0060143	BP	GO:0060143	positive regulation of syncytium formation by plasma membrane fusion	6	0.651799383110788	1.38813226643356	0.135064935064935	0.740019093714615	0.706920828858853	630	tags=50%, list=20%, signal=40%	MAPK14/CAPN2/EHD2
GO:1901739	BP	GO:1901739	regulation of myoblast fusion	6	0.651799383110788	1.38813226643356	0.135064935064935	0.740019093714615	0.706920828858853	630	tags=50%, list=20%, signal=40%	MAPK14/CAPN2/EHD2
GO:1901741	BP	GO:1901741	positive regulation of myoblast fusion	6	0.651799383110788	1.38813226643356	0.135064935064935	0.740019093714615	0.706920828858853	630	tags=50%, list=20%, signal=40%	MAPK14/CAPN2/EHD2
GO:0001662	BP	GO:0001662	behavioral fear response	8	-0.622042629438106	-1.34913204537889	0.135646687697161	0.740019093714615	0.706920828858853	125	tags=38%, list=4%, signal=36%	APOE/COMT/EIF4G1
GO:0002209	BP	GO:0002209	behavioral defense response	8	-0.622042629438106	-1.34913204537889	0.135646687697161	0.740019093714615	0.706920828858853	125	tags=38%, list=4%, signal=36%	APOE/COMT/EIF4G1
GO:0032239	BP	GO:0032239	regulation of nucleobase-containing compound transport	9	-0.597147605978038	-1.34495632461362	0.136012364760433	0.740019093714615	0.706920828858853	702	tags=56%, list=23%, signal=43%	NUP153/TPR/WNK1/RSC1A1/SUPT6H
GO:0061383	BP	GO:0061383	trabecula morphogenesis	3	0.7724609375	1.34093284628035	0.134939759036145	0.740019093714615	0.706920828858853	308	tags=50%, list=10%, signal=45%	FKBP1A/COL1A1
GO:2000647	BP	GO:2000647	negative regulation of stem cell proliferation	3	0.7724609375	1.34093284628035	0.134939759036145	0.740019093714615	0.706920828858853	702	tags=75%, list=23%, signal=58%	CDKN2C/FBLN1/RBPJ
GO:0170038	BP	GO:0170038	proteinogenic amino acid biosynthetic process	23	-0.472858790219405	-1.33307828066008	0.135838150289017	0.740019093714615	0.706920828858853	928	tags=52%, list=30%, signal=37%	SHMT2/MRI1/PLOD3/ASL/GLS/ASNS/PLOD2/SEPHS2/SHMT1/PYCR3/ALDH18A1/PHGDH
GO:0051452	BP	GO:0051452	intracellular pH reduction	16	0.463261289347583	1.33059654388113	0.134146341463415	0.740019093714615	0.706920828858853	361	tags=25%, list=12%, signal=22%	CLIC4/TCIRG1/PPT1/GRN
GO:0008171	MF	GO:0008171	O-methyltransferase activity	6	-0.677703564403189	-1.33002862507731	0.13614262560778	0.740019093714615	0.706920828858853	412	tags=67%, list=13%, signal=58%	MEPCE/MRM1/COMT/FTSJ3
GO:0042771	BP	GO:0042771	intrinsic apoptotic signaling pathway in response to DNA damage by p53 class mediator	13	-0.541811130276992	-1.32942180719397	0.136012364760433	0.740019093714615	0.706920828858853	303	tags=31%, list=10%, signal=28%	RPL26/MSH2/MIF/RPS27L
GO:0009176	BP	GO:0009176	pyrimidine deoxyribonucleoside monophosphate metabolic process	6	-0.67651064820643	-1.32768746476424	0.13614262560778	0.740019093714615	0.706920828858853	450	tags=33%, list=15%, signal=29%	SHMT1/DUT
GO:0015297	MF	GO:0015297	antiporter activity	15	-0.520542471300836	-1.32761445400487	0.135338345864662	0.740019093714615	0.706920828858853	676	tags=40%, list=22%, signal=31%	SLC35A3/CHP1/SLC4A1/SLC4A2/SLC25A10/SLC4A4
GO:0006560	BP	GO:0006560	proline metabolic process	6	-0.674848028852454	-1.32442448748398	0.13614262560778	0.740019093714615	0.706920828858853	397	tags=50%, list=13%, signal=44%	DAO/PYCR3/ALDH18A1
GO:0170034	BP	GO:0170034	L-amino acid biosynthetic process	24	-0.464203021566256	-1.32004634878035	0.135964912280702	0.740019093714615	0.706920828858853	928	tags=50%, list=30%, signal=35%	SHMT2/MRI1/PLOD3/ASL/GLS/ASNS/PLOD2/SEPHS2/SHMT1/PYCR3/ALDH18A1/PHGDH
GO:0045931	BP	GO:0045931	positive regulation of mitotic cell cycle	24	-0.463389621834736	-1.31773329760272	0.135964912280702	0.740019093714615	0.706920828858853	637	tags=58%, list=21%, signal=47%	RCC2/SIN3A/CPSF3/VPS4B/MEPCE/PTPN11/RRM2B/ASNS/CDK1/RDX/RRM1/RRM2/CDK4/EIF4G1
GO:0043047	MF	GO:0043047	single-stranded telomeric DNA binding	3	-0.788629217587187	-1.29998392505266	0.13458262350937	0.740019093714615	0.706920828858853	384	tags=100%, list=12%, signal=88%	HNRNPA2B1/RAD50
GO:0008298	BP	GO:0008298	intracellular mRNA localization	3	-0.788156269732875	-1.29920431329814	0.13458262350937	0.740019093714615	0.706920828858853	36	tags=100%, list=1%, signal=99%	FUBP3/CASC3
GO:1990253	BP	GO:1990253	cellular response to leucine starvation	3	-0.7880859375	-1.29908837697456	0.13458262350937	0.740019093714615	0.706920828858853	655	tags=100%, list=21%, signal=79%	MTOR/RRAGB
GO:0043244	BP	GO:0043244	regulation of protein-containing complex disassembly	45	0.338043927991297	1.260133676455	0.136029411764706	0.740019093714615	0.706920828858853	611	tags=36%, list=20%, signal=29%	DSTN/TWF1/CFL2/CAPG/MAP1B/TWF2/EIF5A/TMOD3/SVIL/UPF1/SH3BP1/ACTN2/ADD1/LMOD1/FLII/CAPZB
GO:0034220	BP	GO:0034220	monoatomic ion transmembrane transport	141	0.260895437349346	1.18390727676585	0.134585051161252	0.740019093714615	0.706920828858853	503	tags=23%, list=16%, signal=20%	FLNA/CLCA1/S100A6/SLMAP/MMP9/TMEM109/CLIC4/ATP1B1/CLIC1/STOM/FKBP1A/YWHAH/NIPSNAP2/ATP5F1D/TCIRG1/YWHAQ/FMR1/FLNA/ATP5MG/SLC25A4/SNTA1/ATP13A1/GPD1L/ATP2B4/ANXA6/DMD/ATP2A2/ATP1A2/ACTN2/MCU/ATP5ME/CLIC2/CALM3
GO:2001034	BP	GO:2001034	positive regulation of double-strand break repair via nonhomologous end joining	4	-0.742463842574083	-1.31570011461924	0.136513157894737	0.741018071855425	0.707875126472672	551	tags=75%, list=18%, signal=62%	SMCHD1/TOP2B/PRKDC
GO:0003697	MF	GO:0003697	single-stranded DNA binding	41	-0.401247753439028	-1.26648790805107	0.136427566807314	0.741018071855425	0.707875126472672	845	tags=39%, list=27%, signal=29%	LONP1/MCM7/SMC5/PCBP1/RECQL/IGHM/SMC2/HNRNPA2B1/MCM3/XPC/MCM4/RAD50/MSH2/TDP2/SMC4/ERCC4
GO:1990403	BP	GO:1990403	embryonic brain development	5	-0.700302783697741	-1.3112182315526	0.136655948553055	0.74128612967672	0.708131195077958	611	tags=60%, list=20%, signal=48%	CDC40/CTNNB1/TRA2B
GO:0042542	BP	GO:0042542	response to hydrogen peroxide	33	0.371863732478833	1.30039143734274	0.137380191693291	0.744705738577838	0.711397857761777	430	tags=21%, list=14%, signal=18%	RHOB/COL1A1/STAT6/FABP1/GPX1/SIRPA/CRYAB
GO:0016741	MF	GO:0016741	transferase activity, transferring one-carbon groups	30	-0.434903595739218	-1.2993297533422	0.137982195845697	0.747458502547067	0.714027500974106	1041	tags=47%, list=34%, signal=31%	TRMT1/NOP2/PRMT5/SHMT2/AS3MT/MEPCE/TRMT112/PRMT3/SHMT1/PRMT9/MRM1/COMT/DNMT1/FTSJ3
GO:0051865	BP	GO:0051865	protein autoubiquitination	7	0.622948551346076	1.3739171680075	0.138211382113821	0.747962133715591	0.714508606618698	947	tags=71%, list=31%, signal=50%	TRIM21/CBL/TRAF6/UBE2D3/UBE3A
GO:0008199	MF	GO:0008199	ferric iron binding	5	-0.698627656076021	-1.30808179124577	0.138263665594855	0.747962133715591	0.714508606618698	323	tags=67%, list=11%, signal=60%	FTL/FTL/RRM2/FTH1
GO:0003231	BP	GO:0003231	cardiac ventricle development	12	0.52054684660173	1.37261505813973	0.138888888888889	0.748084043157297	0.714625063510565	509	tags=29%, list=17%, signal=24%	TPM1/FKBP1A/AP2B1/TGFB1
GO:0003208	BP	GO:0003208	cardiac ventricle morphogenesis	7	0.619317131725175	1.36590804791144	0.140921409214092	0.748084043157297	0.714625063510565	207	tags=22%, list=7%, signal=21%	TPM1/FKBP1A
GO:0055008	BP	GO:0055008	cardiac muscle tissue morphogenesis	7	0.619317131725175	1.36590804791144	0.140921409214092	0.748084043157297	0.714625063510565	207	tags=22%, list=7%, signal=21%	TPM1/FKBP1A
GO:0055010	BP	GO:0055010	ventricular cardiac muscle tissue morphogenesis	7	0.619317131725175	1.36590804791144	0.140921409214092	0.748084043157297	0.714625063510565	207	tags=22%, list=7%, signal=21%	TPM1/FKBP1A
GO:0043516	BP	GO:0043516	regulation of DNA damage response, signal transduction by p53 class mediator	7	-0.644993013055943	-1.34353253376625	0.139020537124803	0.748084043157297	0.714625063510565	752	tags=43%, list=24%, signal=32%	KDM1A/RPL26/MIF
GO:0051290	BP	GO:0051290	protein heterotetramerization	7	-0.644204421114092	-1.34188988197267	0.139020537124803	0.748084043157297	0.714625063510565	518	tags=71%, list=17%, signal=60%	FARSA/CPSF7/RRM1/RRM2/NUDT21
GO:0006884	BP	GO:0006884	cell volume homeostasis	7	-0.64322493009635	-1.33984958382644	0.139020537124803	0.748084043157297	0.714625063510565	864	tags=57%, list=28%, signal=41%	ABCB8/SLC12A2/WNK1/SLC12A9
GO:1902622	BP	GO:1902622	regulation of neutrophil migration	7	-0.643161285381495	-1.33971701069266	0.140600315955766	0.748084043157297	0.714625063510565	20	tags=29%, list=1%, signal=28%	RAC2/MYD88
GO:1902807	BP	GO:1902807	negative regulation of cell cycle G1/S phase transition	12	-0.555159099954303	-1.33903778573246	0.14018691588785	0.748084043157297	0.714625063510565	502	tags=50%, list=16%, signal=42%	CDC73/SDE2/RPL26/CRLF3/RPS27L/PRKDC
GO:2000134	BP	GO:2000134	negative regulation of G1/S transition of mitotic cell cycle	12	-0.555159099954303	-1.33903778573246	0.14018691588785	0.748084043157297	0.714625063510565	502	tags=50%, list=16%, signal=42%	CDC73/SDE2/RPL26/CRLF3/RPS27L/PRKDC
GO:0071006	CC	GO:0071006	U2-type catalytic step 1 spliceosome	8	-0.61727595812557	-1.33879373621294	0.140378548895899	0.748084043157297	0.714625063510565	564	tags=50%, list=18%, signal=41%	SNRNP200/RBM8A/RBM22/CASC3
GO:0071012	CC	GO:0071012	catalytic step 1 spliceosome	8	-0.61727595812557	-1.33879373621294	0.140378548895899	0.748084043157297	0.714625063510565	564	tags=50%, list=18%, signal=41%	SNRNP200/RBM8A/RBM22/CASC3
GO:0043259	CC	GO:0043259	laminin-10 complex	3	0.771007416129877	1.33840964484278	0.139759036144578	0.748084043157297	0.714625063510565	494	tags=67%, list=16%, signal=56%	LAMC1/LAMB1
GO:0010971	BP	GO:0010971	positive regulation of G2/M transition of mitotic cell cycle	8	-0.616186116957937	-1.33643000811129	0.140378548895899	0.748084043157297	0.714625063510565	1105	tags=88%, list=36%, signal=56%	RCC2/SIN3A/VPS4B/RRM2B/CDK1/RRM1/CDK4
GO:0044322	CC	GO:0044322	endoplasmic reticulum quality control compartment	6	-0.672948298254077	-1.32069616700805	0.141004862236629	0.748084043157297	0.714625063510565	434	tags=67%, list=14%, signal=57%	CANX/SEC61B/FBXO6/DERL1
GO:0099532	BP	GO:0099532	synaptic vesicle endosomal processing	6	-0.672006331700548	-1.3188475084708	0.141004862236629	0.748084043157297	0.714625063510565	498	tags=67%, list=16%, signal=56%	EEA1/VTI1A/GRIPAP1/AP1G1
GO:0071474	BP	GO:0071474	cellular hyperosmotic response	6	-0.671897988088766	-1.31863487847653	0.141004862236629	0.748084043157297	0.714625063510565	987	tags=83%, list=32%, signal=57%	XRCC5/AKR1B1/ARHGEF2/WNK1/FBP1
GO:0010224	BP	GO:0010224	response to UV-B	6	-0.670706534916628	-1.31629658942566	0.141004862236629	0.748084043157297	0.714625063510565	471	tags=67%, list=15%, signal=57%	MME/XPC/MSH2/MFAP4
GO:0002903	BP	GO:0002903	negative regulation of B cell apoptotic process	3	-0.787064881464629	-1.29740525846594	0.1396933560477	0.748084043157297	0.714625063510565	76	tags=67%, list=2%, signal=65%	NOC2L/MIF
GO:0010641	BP	GO:0010641	positive regulation of platelet-derived growth factor receptor signaling pathway	3	-0.786973417015087	-1.29725448759483	0.1396933560477	0.748084043157297	0.714625063510565	140	tags=67%, list=5%, signal=64%	HIP1/HIP1R
GO:2000586	BP	GO:2000586	regulation of platelet-derived growth factor receptor-beta signaling pathway	3	-0.786973417015087	-1.29725448759483	0.1396933560477	0.748084043157297	0.714625063510565	140	tags=67%, list=5%, signal=64%	HIP1/HIP1R
GO:2000588	BP	GO:2000588	positive regulation of platelet-derived growth factor receptor-beta signaling pathway	3	-0.786973417015087	-1.29725448759483	0.1396933560477	0.748084043157297	0.714625063510565	140	tags=67%, list=5%, signal=64%	HIP1/HIP1R
GO:0051445	BP	GO:0051445	regulation of meiotic cell cycle	3	-0.786469536388351	-1.29642388596317	0.1396933560477	0.748084043157297	0.714625063510565	487	tags=100%, list=16%, signal=84%	CDC27/TRIP13
GO:0030014	CC	GO:0030014	CCR4-NOT complex	3	-0.785889943151348	-1.29546847894252	0.1396933560477	0.748084043157297	0.714625063510565	550	tags=100%, list=18%, signal=82%	CNOT2/CNOT1
GO:0030015	CC	GO:0030015	CCR4-NOT core complex	3	-0.785889943151348	-1.29546847894252	0.1396933560477	0.748084043157297	0.714625063510565	550	tags=100%, list=18%, signal=82%	CNOT2/CNOT1
GO:0030893	CC	GO:0030893	meiotic cohesin complex	3	-0.785481770833333	-1.29479564379993	0.141396933560477	0.748084043157297	0.714625063510565	663	tags=100%, list=22%, signal=79%	SMC3/RAD21
GO:0034089	BP	GO:0034089	establishment of meiotic sister chromatid cohesion	3	-0.785481770833333	-1.29479564379993	0.141396933560477	0.748084043157297	0.714625063510565	663	tags=100%, list=22%, signal=79%	SMC3/RAD21
GO:0140713	MF	GO:0140713	histone chaperone activity	3	-0.784740716063211	-1.29357408204789	0.141396933560477	0.748084043157297	0.714625063510565	20	tags=67%, list=1%, signal=66%	NAP1L1/MYD88
GO:0060670	BP	GO:0060670	branching involved in labyrinthine layer morphogenesis	3	-0.784352138201702	-1.29293354659431	0.141396933560477	0.748084043157297	0.714625063510565	37	tags=67%, list=1%, signal=66%	GRB2/TMED2
GO:0035725	BP	GO:0035725	sodium ion transmembrane transport	20	0.409111549158462	1.2730007322301	0.139751552795031	0.748084043157297	0.714625063510565	437	tags=40%, list=14%, signal=35%	SLMAP/ATP1B1/YWHAH/SNTA1/GPD1L/ATP2B4/DMD/ATP1A2
GO:0006839	BP	GO:0006839	mitochondrial transport	49	-0.381119791077416	-1.25182947569599	0.139001349527665	0.748084043157297	0.714625063510565	952	tags=43%, list=31%, signal=30%	RHOT1/CPT2/AIFM1/ABCB8/PMPCB/TOMM7/SFXN5/SPG7/NDUFA13/TIMM9/PDCD5/SFXN1/MTCH2/ACAA2/SLC25A22/BAK1/ATP5IF1/HIP1R/TIMM8A/MTX1/ABCB7
GO:0046907	BP	GO:0046907	intracellular transport	413	-0.282759199809237	-1.15813929957182	0.139896373056995	0.748084043157297	0.714625063510565	712	tags=23%, list=23%, signal=20%	EHD4/ELAVL1/RAN/SPG7/TOM1/TPR/NDUFA13/TIMM9/PDCD5/ARHGEF2/TRAPPC12/UBAC2/CORO1C/MYO5B/PTPN11/KIF5B/SNX2/EHD3/APOE/WNK1/PIP4K2A/TNPO3/CHMP1A/ARFIP1/SRSF3/ANKFY1/GNPTAB/CDK1/SORL1/SRPRA/VPS37C/CDK5/LAMP1/VTI1A/SNX12/VTA1/STX7/RDX/SRSF10/CTSA/MIA2/CHP1/NEMF/SEC61B/SEC13/VPS51/TBC1D5/HNRNPA2B1/ACTR10/EIPR1/MIA3/COPE/MTCH2/SLC51B/TMED5/CHP2/CTTN/MCM3AP/ARF1/RPL23/VPS33B/F8A1/RBM8A/TRAPPC8/CDH1/LMAN1/V…
GO:0031325	BP	GO:0031325	positive regulation of cellular metabolic process	602	-0.274572263839026	-1.13685010987855	0.141104294478528	0.748084043157297	0.714625063510565	726	tags=23%, list=24%, signal=22%	RBM14/PCBP1/ITGA1/CHD4/SRSF1/TRMT112/RNF40/EHD4/ELAVL1/CDC73/TOM1/SYNCRIP/TRIM25/DDRGK1/DDX21/RPS4X/PDCD5/ARHGEF2/SERPINF2/MOV10/FXR1/FOXK1/ITGA6/PTPN11/MAFG/TAB1/CHD3/APOE/PELP1/WNK1/PIP4K2A/FCN1/PRRC1/PLCG2/NFYC/ADNP/HNRNPAB/GATAD2B/CDK1/SORL1/SMCHD1/CNOT2/CTBP1/GTPBP1/CSDE1/HNRNPD/SPTLC1/MRPS27/CCT3/LMO7/PDGFRB/BABAM1/CTNNB1/RDX/DHX34/CDC5L/HVCN1/RAD21/TAF15/UBTF/DDX17/CHP1/PSMC5/HNF4A/DHRS4/N…
[truncated: 6,436 more rows]
