# Supplementary material for: Tolerability and effect of inhibiting microfibrillar-associated protein 4 in small intestinal anastomotic healing
Source: Research Square preprint supplement (doi:10.21203/rs.3.rs-7132995/v1), 2025-09-11
Supplement: Supplementary file 2 [file 685532d730c2a746aea581b3.xlsx]

## Sheet: Ark 1 - xgse_Anakinra_1_
xgse_Anakinra[1]
	ONTOLOGY	ID	Description	setSize	enrichmentScore	NES	pvalue	p.adjust	qvalue	rank	leading_edge	core_enrichment
GO:0030199	BP	GO:0030199	collagen fibril organization	30	-0.743740229011878	-2.53012987544608	4.42132792291411e-06	0.0350876583962464	0.0339883766537282	554	tags=65%, list=18%, signal=53%	CYP1B1/LUM/COL12A1/AEBP1/SERPINF2/COL5A1/PLOD3/ANXA2/P4HA1/DPT/TNXB/COL5A2/CRTAP/FKBP10/EFEMP2/COL1A1/COL1A2/COL3A1/COL28A1/COL2A1
GO:0009266	BP	GO:0009266	response to temperature stimulus	36	0.613050294533098	2.04106366019341	1.6481018187803e-05	0.0653966801692022	0.0633478293818554	734	tags=58%, list=24%, signal=45%	HSPB6/DNAJA1/PDCD6/CXCL12/ACADM/HSPB1/HSP90AB1/CRYAB/DNAJA2/PRKACA/EIF2B3/BAG3/HDAC6/DNAJB1/EIF2B5/HSPD1/PRKAA1/ERO1A/SOD1/HSP90AA1/DNAJB6
GO:0051082	MF	GO:0051082	unfolded protein binding	52	0.542181949092494	1.95001103724331	3.07484070664435e-05	0.0813397861597652	0.0787914444934165	734	tags=53%, list=24%, signal=41%	HSPB6/UGGT1/DNAJA1/PFDN6/TAPBP/PTGES3/HSPB1/HSP90AB1/CRYAB/DNAJA2/CCT2/RUVBL2/SPG7/PPIA/CCT3/CANX/TCP1/PFDN2/DNAJB1/CLU/HSPA8/GRPEL1/HSPD1/CCT5/CCAR2/CCT3/HSP90AA1/DNAJB6
GO:0062023	CC	GO:0062023	collagen-containing extracellular matrix	168	-0.391475834323436	-1.7825754072371	4.18129070948735e-05	0.0829568076762291	0.0803578053983846	459	tags=31%, list=15%, signal=28%	FBN1/ANXA4/AEBP1/LMAN1/C1QB/SERPINF2/HMCN2/CTSZ/COL5A1/APOE/LAD1/PLOD3/ITIH1/LTBP2/MMP9/APOA1/AMBP/FBLN2/FCN2/APOA4/ANXA2/EMILIN2/COL6A6/VWA1/F2/COL6A3/DPT/P3H1/ITIH4/TNXB/COL5A2/TNC/MMRN2/PLG/FBLN1/ITGB4/ITIH4/EFEMP2/COL1A1/S100A8/PZP/CLEC3B/APOC3/FGG/S100A10/HNRNPM/COL1A2/COL4A2/COL3A1/FGB/COL28A1/FN1/COL2A1/FGA
GO:0098644	CC	GO:0098644	complex of collagen trimers	11	-0.846153731615122	-2.22846391061621	8.03661828536008e-05	0.10167864180833	0.098493092254647	165	tags=73%, list=5%, signal=69%	COL5A1/COL5A2/COL1A1/COL1A2/COL4A2/COL3A1/COL28A1/COL2A1
GO:0030312	CC	GO:0030312	external encapsulating structure	177	-0.393186338412235	-1.79816983540099	8.9686301998275e-05	0.10167864180833	0.098493092254647	487	tags=32%, list=16%, signal=29%	IGFALS/FBN1/ANXA4/AEBP1/LMAN1/C1QB/SERPINF2/HMCN2/CTSZ/COL5A1/APOE/MFAP1/FCGBP/LAD1/PLOD3/ITIH1/LTBP2/MMP9/APOA1/AMBP/FBLN2/FCN2/APOA4/ANXA2/EMILIN2/COL6A6/VWA1/F2/COL6A3/DPT/P3H1/ITIH4/TNXB/COL5A2/TNC/MMRN2/PLG/FBLN1/ITGB4/ITIH4/EFEMP2/COL1A1/S100A8/MMP14/PZP/CLEC3B/GLG1/APOC3/FGG/S100A10/HNRNPM/COL1A2/COL4A2/COL3A1/FGB/COL28A1/FN1/COL2A1/FGA
GO:0031012	CC	GO:0031012	extracellular matrix	177	-0.393186338412235	-1.79816983540099	8.9686301998275e-05	0.10167864180833	0.098493092254647	487	tags=32%, list=16%, signal=29%	IGFALS/FBN1/ANXA4/AEBP1/LMAN1/C1QB/SERPINF2/HMCN2/CTSZ/COL5A1/APOE/MFAP1/FCGBP/LAD1/PLOD3/ITIH1/LTBP2/MMP9/APOA1/AMBP/FBLN2/FCN2/APOA4/ANXA2/EMILIN2/COL6A6/VWA1/F2/COL6A3/DPT/P3H1/ITIH4/TNXB/COL5A2/TNC/MMRN2/PLG/FBLN1/ITGB4/ITIH4/EFEMP2/COL1A1/S100A8/MMP14/PZP/CLEC3B/GLG1/APOC3/FGG/S100A10/HNRNPM/COL1A2/COL4A2/COL3A1/FGB/COL28A1/FN1/COL2A1/FGA
GO:0005583	CC	GO:0005583	fibrillar collagen trimer	8	-0.849644017595155	-2.01623351542786	0.000146593231997746	0.119106504662716	0.115374947415086	165	tags=100%, list=5%, signal=95%	COL5A1/COL5A2/COL1A1/COL1A2/COL3A1/COL28A1/COL2A1
GO:0098643	CC	GO:0098643	banded collagen fibril	8	-0.849644017595155	-2.01623351542786	0.000146593231997746	0.119106504662716	0.115374947415086	165	tags=100%, list=5%, signal=95%	COL5A1/COL5A2/COL1A1/COL1A2/COL3A1/COL28A1/COL2A1
GO:0045907	BP	GO:0045907	positive regulation of vasoconstriction	6	-0.909099959497145	-2.00997760179044	0.000150083801238301	0.119106504662716	0.115374947415086	187	tags=67%, list=6%, signal=63%	CAV1/FGG/FGB/FGA
GO:0101031	CC	GO:0101031	protein folding chaperone complex	22	0.656639803454217	1.96114910783193	0.000250419964119238	0.180666621386388	0.175006411288306	887	tags=74%, list=29%, signal=53%	SDF2/PFDN6/RPAP3/PTGES3/HSP90AB1/CCT2/RUVBL2/BAG3/CCT3/TCP1/PFDN2/HSPA8/CCT5/STIP1/CCT3/CCT8/CCT6A
GO:0000786	CC	GO:0000786	nucleosome	17	0.701138239506837	1.95684429236758	0.000352917628226593	0.181345458510182	0.175663980727379	784	tags=82%, list=25%, signal=62%	H2AC21/TGM2/H1-2/H2AC18/H1-3/RUVBL2/H2AZ2/H1-10/H2AX/H2BC4/DMAP1/MACROH2A2/TRRAP/H3C1
GO:0048002	BP	GO:0048002	antigen processing and presentation of peptide antigen	16	0.703874017385657	1.94648045511447	0.000304405901107572	0.181345458510182	0.175663980727379	576	tags=59%, list=19%, signal=48%	IKBKB/TAP2/TAPBP/SAR1B/IDE/TRAF6/CD74/LNPEP/TAP1/ERAP1
GO:0048407	MF	GO:0048407	platelet-derived growth factor binding	8	-0.820239296893681	-1.94645513511523	0.000411317824241843	0.181345458510182	0.175663980727379	115	tags=62%, list=4%, signal=60%	COL5A1/COL1A1/COL1A2/COL3A1/COL2A1
GO:0009408	BP	GO:0009408	response to heat	27	0.620288226404905	1.92728742887208	0.000317380100888579	0.181345458510182	0.175663980727379	734	tags=59%, list=24%, signal=46%	HSPB6/DNAJA1/PDCD6/HSPB1/HSP90AB1/CRYAB/DNAJA2/PRKACA/EIF2B3/BAG3/HDAC6/DNAJB1/EIF2B5/SOD1/HSP90AA1/DNAJB6
GO:0022626	CC	GO:0022626	cytosolic ribosome	81	0.44693873598129	1.74422763481953	0.000407402371219263	0.181345458510182	0.175663980727379	938	tags=49%, list=31%, signal=35%	RPS10/RPL26/RPL21/RPL24/RPS6/RPS23/RPL11/RPL13A/RPS17/RPL9/RPL27A/RPS26/RPL10/ETF1/RPL10A/RPS9/EEF1A1/RPL35/RPL28/RPL27/RPS16/RSL1D1/RPL23A/RPS11/RPS15A/RPS7/RPS29/DDX3X/RPL15/RPL18/PELO/SNU13/RPL7/RPL3/RPS8/GSPT1/RPL8/RPL17/RPL12/RPL38
GO:0002181	BP	GO:0002181	cytoplasmic translation	111	0.424833948919255	1.74077553526102	0.000377343706805843	0.181345458510182	0.175663980727379	1163	tags=58%, list=38%, signal=37%	RPS10/RPL26/RPL21/RPL24/RPS6/RPS23/RPL11/FMR1/RPL13A/RPS17/RPL9/RPL27A/DRG1/RPS26/RPL10/ETF1/RPL10A/HNRNPD/EIF2B3/RPS9/RPL35/RPL28/RPL27/RPS16/EIF2B5/RPL23A/RPS11/RPS15A/EIF4A1/RPS7/RPS29/RPL15/SARS1/EIF3B/EIF4A2/PABPC1/IMPACT/RPL18/SYNCRIP/PKM/RPL7/EIF3L/SH3BGRL/RPL3/RPS8/RPL8/RPL17/EIF2S3/RPL12/RPL38/RPL5/RPL22L1/RPLP0/NEMF/RPS25/HNRNPU/DRG2/RPS3A/DHX9/RPS13/MTOR/RPS4X/ZC3H15/RPS3
GO:0045934	BP	GO:0045934	negative regulation of nucleobase-containing compound metabolic process	243	0.340628123423349	1.54893237790675	0.000346726581292156	0.181345458510182	0.175663980727379	1002	tags=42%, list=33%, signal=31%	S100A11/TAF15/DAP/SRSF4/UBE2I/FLNA/MAFG/PTBP1/HIF1AN/SARNP/PCNA/PRDX5/H1-2/FMR1/BTAF1/WFS1/SRSF2/DRAP1/RBBP4/SRSF6/RPS26/RPL10/STAT1/TRAF6/HNRNPD/U2AF2/STRN3/CRYAB/H1-3/PRKACA/HMGB1/MNT/ENO1/MAPK14/RUVBL2/FLNA/COPS2/LIMD1/SNW1/RIOX2/DDX54/ELANE/PPID/H1-10/MYD88/NFKB1/HDAC6/SAMD1/SLFN11/CREB1/PDS5A/UHRF1/HCLS1/DMAP1/STAT6/SRSF7/HNRNPC/DNAJB1/BIN1/PDCD4/HSPA8/MSH3/SARS1/CCAR2/MACROH2A2/LANCL2/MSH6/…
GO:0005788	CC	GO:0005788	endoplasmic reticulum lumen	113	-0.423704317707547	-1.81073188107102	0.000448801070756115	0.187457120922133	0.181584167298167	597	tags=37%, list=19%, signal=31%	C3/DNAJB11/VCAN/SERPINA1/PRKCSH/COL12A1/CP/APOB/FBN1/CALU/CTSZ/COL5A1/APOE/PLOD3/APOA1/APOA4/NUCB1/TXNDC12/VWA1/F2/COL6A3/P4HA1/P3H1/RCN3/QSOX1/COL5A2/TNC/CRTAP/GOLM1/FKBP10/MIA3/COL1A1/SERPIND1/FGG/COL1A2/COL4A2/COL3A1/COL28A1/F5/FN1/COL2A1/FGA
GO:0031519	CC	GO:0031519	PcG protein complex	6	0.882129648329781	1.79914554013503	0.000514765503886491	0.20425895194216	0.197859603941213	199	tags=50%, list=6%, signal=47%	CSNK2B/UBAP2L/RBBP4
GO:1903320	BP	GO:1903320	regulation of protein modification by small protein conjugation or removal	58	0.492033368678473	1.80280733190841	0.000571940269003329	0.216138951181448	0.20936740774593	752	tags=43%, list=24%, signal=33%	UBE2I/DNAJA1/COPS5/ISG15/RPL11/WNK1/PDCD6/WFS1/AIMP2/COPS6/TRAF6/HSP90AB1/U2AF2/DERL1/PARK7/COPS2/UBE2V1/PPIA/NXN/GPS1/RPS7/DDX3X/TRIM21/HSP90AA1/KDM1A
GO:0046629	BP	GO:0046629	gamma-delta T cell activation	6	-0.874083663172957	-1.93255820409494	0.000640922415583899	0.222159751918984	0.215199579300767	2	tags=33%, list=0%, signal=33%	CXADR/ALKBH5
GO:0051253	BP	GO:0051253	negative regulation of RNA metabolic process	219	0.350878588388119	1.57669663822589	0.000643860168111975	0.222159751918984	0.215199579300767	1002	tags=43%, list=33%, signal=31%	TAF15/DAP/SRSF4/UBE2I/FLNA/MAFG/PTBP1/HIF1AN/SARNP/PCNA/PRDX5/H1-2/FMR1/BTAF1/WFS1/SRSF2/DRAP1/RBBP4/SRSF6/RPS26/RPL10/STAT1/TRAF6/HNRNPD/U2AF2/STRN3/CRYAB/H1-3/HMGB1/MNT/ENO1/MAPK14/RUVBL2/FLNA/COPS2/LIMD1/SNW1/RIOX2/DDX54/ELANE/PPID/MYD88/NFKB1/HDAC6/SAMD1/CREB1/UHRF1/HCLS1/DMAP1/STAT6/SRSF7/HNRNPC/DNAJB1/BIN1/PDCD4/HSPA8/SARS1/CCAR2/MACROH2A2/LANCL2/PABPC1/SF1/MEPCE/DNAJB6/PHB1/HDAC1/IMPACT/KD…
GO:0034660	BP	GO:0034660	ncRNA metabolic process	164	0.370201809404836	1.59452847374171	0.000717095548374255	0.23711959466242	0.229690736393736	1088	tags=45%, list=35%, signal=30%	RPL26/RPS6/CDK7/DDX18/MRM1/PUS1/RPL11/NPM3/RPS17/ELOC/FBL/HSD17B10/TP53RK/RPL10A/ELOB/TRMT5/RPL35/EXOSC4/DDX54/TRMT1/NFKB1/NOP58/SSB/NOP56/NARS1/UTP11/TARS1/TBL3/INTS13/YARS2/XPO5/RTCB/MTREX/NCL/RPL27/RPS16/RSL1D1/SBDS/URB1/ADAR/RPS7/MARS1/SARS1/MACROH2A2/HARS1/MEPCE/LSM6/KARS1/SMARCB1/NOP2/QNG1/PELO/DDX21/GATC/SNU13/RPL7/PELP1/DTD2/RPS8/ELAC2/NUP155/PA2G4/DDX17/SMARCA4/DDX5/RPL5/NOB1/RPS25/PARS2…
GO:0070988	BP	GO:0070988	demethylation	10	-0.832910080655727	-2.11657416593011	0.000822270160155526	0.252810341356193	0.244889898520304	210	tags=30%, list=7%, signal=28%	PHF2/PPME1/ALKBH5
GO:0060350	BP	GO:0060350	endochondral bone morphogenesis	8	-0.800764117990354	-1.90023988777555	0.000955684254118673	0.252810341356193	0.244889898520304	115	tags=75%, list=4%, signal=72%	TMEM119/MEF2D/COL1A1/MMP14/COL3A1/COL2A1
GO:0032946	BP	GO:0032946	positive regulation of mononuclear cell proliferation	24	0.612282866258679	1.85795301973961	0.000926864844209888	0.252810341356193	0.244889898520304	466	tags=42%, list=15%, signal=36%	TFRC/MIF/PTPRC/TRAF6/CD74/HMGB1/CORO1A/PNP/MYD88/NCKAP1L
GO:0050671	BP	GO:0050671	positive regulation of lymphocyte proliferation	24	0.612282866258679	1.85795301973961	0.000926864844209888	0.252810341356193	0.244889898520304	466	tags=42%, list=15%, signal=36%	TFRC/MIF/PTPRC/TRAF6/CD74/HMGB1/CORO1A/PNP/MYD88/NCKAP1L
GO:0034470	BP	GO:0034470	ncRNA processing	106	0.40260559005096	1.64378105254236	0.000906066482192524	0.252810341356193	0.244889898520304	1011	tags=46%, list=33%, signal=32%	RPL26/RPS6/DDX18/MRM1/PUS1/RPL11/NPM3/RPS17/FBL/HSD17B10/TP53RK/RPL10A/TRMT5/RPL35/EXOSC4/DDX54/TRMT1/NOP58/SSB/NOP56/UTP11/TBL3/INTS13/RTCB/MTREX/RPL27/RPS16/RSL1D1/SBDS/URB1/ADAR/RPS7/SARS1/LSM6/KARS1/NOP2/QNG1/DDX21/SNU13/RPL7/PELP1/RPS8/ELAC2/NUP155/PA2G4/DDX17/DDX5/RPL5/NOB1
GO:0051172	BP	GO:0051172	negative regulation of nitrogen compound metabolic process	433	0.29903600930986	1.43918514564637	0.000907314930629602	0.252810341356193	0.244889898520304	766	tags=31%, list=25%, signal=27%	S100A11/TAF15/DAP/TYMS/SRSF4/IKBKB/UBE2I/FLNA/MAFG/DNAJA1/PTBP1/HIF1AN/SARNP/MIF/PCNA/PRDX5/SPINK1/IPO5/EIF4E/ISG15/RPL11/H1-2/SERPINB10/PFDN6/FMR1/WNK1/RPL13A/BTAF1/SERPINB9/GPX1/WFS1/PTPRC/SRSF2/PRKAR2B/DRAP1/RBBP4/SRSF6/RPS26/RPL10/STAT1/TRAF6/HNRNPD/HSPB1/AHSG/HSP90AB1/U2AF2/STRN3/CRYAB/H1-3/PRKACA/HMGB1/MNT/ENO1/SNX3/DHFR/PARK7/MAPK14/RUVBL2/FLNA/COPS2/LIMD1/CORO1C/BAG6/SNW1/CSTB/SNX12/RIOX2…
GO:0030198	BP	GO:0030198	extracellular matrix organization	74	-0.47464304160553	-1.89424586885826	0.00133755722109508	0.294857058516961	0.285619309522146	410	tags=34%, list=13%, signal=30%	SERPINF2/COL5A1/FLOT1/PLOD3/MYH11/MMP9/ANXA2/VWA1/P4HA1/DPT/CAV1/QSOX1/TNXB/COL5A2/CRTAP/FKBP10/PLG/FBLN1/EFEMP2/COL1A1/MMP14/COL1A2/COL4A2/COL3A1/COL28A1/COL2A1
GO:0043062	BP	GO:0043062	extracellular structure organization	74	-0.47464304160553	-1.89424586885826	0.00133755722109508	0.294857058516961	0.285619309522146	410	tags=34%, list=13%, signal=30%	SERPINF2/COL5A1/FLOT1/PLOD3/MYH11/MMP9/ANXA2/VWA1/P4HA1/DPT/CAV1/QSOX1/TNXB/COL5A2/CRTAP/FKBP10/PLG/FBLN1/EFEMP2/COL1A1/MMP14/COL1A2/COL4A2/COL3A1/COL28A1/COL2A1
GO:0045229	BP	GO:0045229	external encapsulating structure organization	74	-0.47464304160553	-1.89424586885826	0.00133755722109508	0.294857058516961	0.285619309522146	410	tags=34%, list=13%, signal=30%	SERPINF2/COL5A1/FLOT1/PLOD3/MYH11/MMP9/ANXA2/VWA1/P4HA1/DPT/CAV1/QSOX1/TNXB/COL5A2/CRTAP/FKBP10/PLG/FBLN1/EFEMP2/COL1A1/MMP14/COL1A2/COL4A2/COL3A1/COL28A1/COL2A1
GO:0030890	BP	GO:0030890	positive regulation of B cell proliferation	8	0.800865727256801	1.78439620246958	0.0013086483633402	0.294857058516961	0.285619309522146	466	tags=62%, list=15%, signal=53%	TFRC/MIF/PTPRC/CD74/NCKAP1L
GO:0070665	BP	GO:0070665	positive regulation of leukocyte proliferation	28	0.569032111293159	1.782906225886	0.00129036578839926	0.294857058516961	0.285619309522146	496	tags=39%, list=16%, signal=33%	TFRC/MIF/PTPRC/TRAF6/CD74/HMGB1/CORO1A/PNP/MYD88/NCKAP1L/RAC2
GO:0002573	BP	GO:0002573	myeloid leukocyte differentiation	44	0.508453125228682	1.75838847178934	0.00133521645862875	0.294857058516961	0.285619309522146	642	tags=41%, list=21%, signal=33%	NME2/TFRC/CD101/PRXL2A/TCIRG1/SLC4A2/TRAF6/CD74/MAPK14/ACIN1/STAT5A/MYD88/CREB1/HCLS1/GLO1/PRTN3/INPP5D/PAFAH1B1
GO:0042382	CC	GO:0042382	paraspeckles	7	-0.840593541228045	-1.93758690406668	0.00138101375955636	0.296208789076738	0.28692869092575	144	tags=38%, list=5%, signal=36%	CPSF6/HNRNPM/ALKBH5
GO:0042627	CC	GO:0042627	chylomicron	7	-0.831812255541069	-1.91734584425186	0.00163632168725634	0.309186878811103	0.299500182507095	524	tags=100%, list=17%, signal=83%	APOB/LSR/APOE/APOA1/APOA4/APOC3
GO:2000786	BP	GO:2000786	positive regulation of autophagosome assembly	7	-0.830969023867479	-1.91540217639372	0.00163632168725634	0.309186878811103	0.299500182507095	80	tags=57%, list=3%, signal=56%	SH3GLB1/PIP4K2A/SNX18/RALB
GO:0045639	BP	GO:0045639	positive regulation of myeloid cell differentiation	21	0.619707571453821	1.8230247690921	0.00150218129802566	0.309186878811103	0.299500182507095	572	tags=52%, list=19%, signal=43%	CD101/ISG15/STAT1/TRAF6/CD74/MAPK14/ACIN1/NCKAP1L/CREB1/HCLS1/INPP5D
GO:0030016	CC	GO:0030016	myofibril	77	0.426359106172967	1.65015242587604	0.00161162482292698	0.309186878811103	0.299500182507095	983	tags=52%, list=32%, signal=37%	FLNA/TPM1/CSRP1/PDLIM7/HSPB1/TPM2/CRYAB/DES/PGM5/ENO1/SYNPO/FLNA/CORO1C/NEXN/ILK/BAG3/DAG1/MYL9/PDLIM3/SYNPO2/LMOD1/ACTG1/CAB39/TMOD3/ACTA1/CAPZB/BIN1/ALDOA/CALM3/RPL15/SYNM/PPP2R5A/TWF1/DNAJB6/PPP1R12B/TPM4/TWF2/FLNC/ACTN4/PSMA6/PDLIM4/VCL/FLNB
GO:0006457	BP	GO:0006457	protein folding	96	0.404418288964688	1.63310938215215	0.00153325847331855	0.309186878811103	0.299500182507095	747	tags=41%, list=24%, signal=32%	SDF2/HSPB6/UGGT1/DNAJA1/PFDN6/TAPBP/WFS1/PTGES3/HSPB1/CD74/HSP90AB1/CRYAB/DNAJA2/TBCC/PDCD5/CCT2/TBCB/RUVBL2/BAG3/PPID/PPIA/CCT3/CANX/TCP1/PFDN2/DNAJB1/HSPH1/CLU/HSPA8/GRPEL1/HSPD1/CCT5/ERP44/ERO1A/TXNDC5/PPIL1/CCT3/HSP90AA1/DNAJB6/TBCA
GO:0140693	MF	GO:0140693	molecular condensate scaffold activity	17	-0.737728538924707	-2.16018614340813	0.00174803988621986	0.315282830387291	0.305405150456068	2	tags=12%, list=0%, signal=12%	TARDBP/ALKBH5
GO:0008299	BP	GO:0008299	isoprenoid biosynthetic process	7	0.827658051983426	1.78735693638601	0.00171517238156644	0.315282830387291	0.305405150456068	79	tags=29%, list=3%, signal=28%	FDPS/ALDH1A3
GO:0046039	BP	GO:0046039	GTP metabolic process	10	0.74340331721056	1.7972274496731	0.00182193074686592	0.317899902687605	0.307940230969809	266	tags=50%, list=9%, signal=46%	NME2/RAN/NME1/IMPDH2/AK4
GO:0030017	CC	GO:0030017	sarcomere	64	0.451202611273376	1.69045866641297	0.00184266576658642	0.317899902687605	0.307940230969809	678	tags=42%, list=22%, signal=34%	FLNA/TPM1/CSRP1/PDLIM7/HSPB1/TPM2/CRYAB/DES/PGM5/ENO1/SYNPO/FLNA/CORO1C/NEXN/ILK/BAG3/MYL9/PDLIM3/SYNPO2/LMOD1/CAB39/TMOD3/ACTA1/CAPZB/BIN1/ALDOA/CALM3/RPL15/PPP2R5A
GO:0019838	MF	GO:0019838	growth factor binding	26	-0.65180256361387	-2.15339269729877	0.00296143441904001	0.321482099472123	0.311410199019116	528	tags=42%, list=17%, signal=35%	VASN/IGFALS/COL5A1/LTBP2/ERBB2/ITGB4/COL1A1/GLG1/COL1A2/COL3A1/COL2A1
GO:0061014	BP	GO:0061014	positive regulation of mRNA catabolic process	30	-0.624285726705917	-2.12375760559805	0.00301301257339933	0.321482099472123	0.311410199019116	62	tags=7%, list=2%, signal=7%	YBX1/ALKBH5
GO:0060349	BP	GO:0060349	bone morphogenesis	11	-0.737038446717832	-1.94109358368273	0.00278093406307621	0.321482099472123	0.311410199019116	115	tags=45%, list=4%, signal=44%	COL1A1/MMP14/GLG1/COL3A1/COL2A1
GO:0042730	BP	GO:0042730	fibrinolysis	12	-0.71490654541032	-1.93370899342318	0.00291074321712207	0.321482099472123	0.311410199019116	410	tags=58%, list=13%, signal=51%	SERPINF2/ANXA2/F2/PLG/FGG/FGB/FGA
GO:2000785	BP	GO:2000785	regulation of autophagosome assembly	11	-0.730171149023105	-1.92300759705363	0.00307111151923632	0.321482099472123	0.311410199019116	80	tags=55%, list=3%, signal=53%	SH3GLB1/SEC22B/PIP4K2A/RAB5A/SNX18/RALB
GO:0005201	MF	GO:0005201	extracellular matrix structural constituent	78	-0.469446872396602	-1.90326066830231	0.00221430964847501	0.321482099472123	0.311410199019116	399	tags=30%, list=13%, signal=27%	HMCN2/COL5A1/LTBP2/FBLN2/EMILIN2/COL6A6/VWA1/COL6A3/DPT/TNXB/COL5A2/TNC/MMRN2/FBLN1/EFEMP2/COL1A1/FGG/COL1A2/COL4A2/COL3A1/FGB/COL28A1/FN1/COL2A1/FGA
GO:0005577	CC	GO:0005577	fibrinogen complex	7	-0.820170413728043	-1.89051113861853	0.00228619896776865	0.321482099472123	0.311410199019116	73	tags=71%, list=2%, signal=70%	SERPINF2/FGG/FGB/FN1/FGA
GO:0034362	CC	GO:0034362	low-density lipoprotein particle	7	-0.810132604189424	-1.86737376323597	0.00282231557508292	0.321482099472123	0.311410199019116	524	tags=86%, list=17%, signal=71%	APOBR/APOB/LSR/APOE/APOA1/APOA4
GO:0031331	BP	GO:0031331	positive regulation of cellular catabolic process	76	-0.46351310300647	-1.85905388059833	0.00230517657105616	0.321482099472123	0.311410199019116	435	tags=21%, list=14%, signal=19%	PLIN5/PRKCD/ROCK2/TOM1/APOE/TARDBP/SLC4A4/APOA4/CNOT2/AKT2/ADRA2A/PIP4K2A/YBX1/SNX18/RALB/ALKBH5
GO:0034367	BP	GO:0034367	protein-containing complex remodeling	8	-0.760994946994778	-1.80586632216272	0.00300795241344226	0.321482099472123	0.311410199019116	615	tags=75%, list=20%, signal=60%	AGT/APOB/APOE/APOA1/APOA4/APOC3
GO:0034368	BP	GO:0034368	protein-lipid complex remodeling	8	-0.760994946994778	-1.80586632216272	0.00300795241344226	0.321482099472123	0.311410199019116	615	tags=75%, list=20%, signal=60%	AGT/APOB/APOE/APOA1/APOA4/APOC3
GO:0034369	BP	GO:0034369	plasma lipoprotein particle remodeling	8	-0.760994946994778	-1.80586632216272	0.00300795241344226	0.321482099472123	0.311410199019116	615	tags=75%, list=20%, signal=60%	AGT/APOB/APOE/APOA1/APOA4/APOC3
GO:0002474	BP	GO:0002474	antigen processing and presentation of peptide antigen via MHC class I	11	0.729294807664616	1.80495224993814	0.00229961675828639	0.321482099472123	0.311410199019116	576	tags=73%, list=19%, signal=59%	IKBKB/TAP2/TAPBP/SAR1B/IDE/LNPEP/TAP1/ERAP1
GO:0030527	MF	GO:0030527	structural constituent of chromatin	11	0.725111583452993	1.79459907057444	0.00250732131608279	0.321482099472123	0.311410199019116	784	tags=91%, list=25%, signal=68%	H2AC21/H1-2/H2AC18/H1-3/H2AZ2/H1-10/H2AX/H2BC4/MACROH2A2/H3C1
GO:0031492	MF	GO:0031492	nucleosomal DNA binding	21	0.607354799357059	1.78668600136248	0.00258944845842712	0.321482099472123	0.311410199019116	985	tags=76%, list=32%, signal=52%	H2AC21/H1-2/RBBP4/H2AC18/H1-3/SMARCD2/H2AZ2/H1-10/H2AX/HNRNPC/MACROH2A2/SMARCC1/HDAC1/SMARCB1/RCC1/SMARCA4
GO:0046849	BP	GO:0046849	bone remodeling	19	0.624888833662409	1.78573110868606	0.00260503521007358	0.321482099472123	0.311410199019116	572	tags=47%, list=19%, signal=39%	TFRC/TCIRG1/SLC4A2/CSK/TRAF6/RAB7A/RAC2/SPP2/INPP5D
GO:0002763	BP	GO:0002763	positive regulation of myeloid leukocyte differentiation	10	0.731220699024369	1.76777515196845	0.00300690539185325	0.321482099472123	0.311410199019116	546	tags=60%, list=18%, signal=50%	CD101/TRAF6/CD74/ACIN1/CREB1/HCLS1
GO:0002478	BP	GO:0002478	antigen processing and presentation of exogenous peptide antigen	7	0.813769834131486	1.75736483704955	0.00265622020087614	0.321482099472123	0.311410199019116	467	tags=62%, list=15%, signal=53%	IKBKB/TAP2/TRAF6/CD74/LNPEP
GO:0038063	BP	GO:0038063	collagen-activated tyrosine kinase receptor signaling pathway	4	-0.903285476604789	-1.75562503361199	0.00307870962196086	0.321482099472123	0.311410199019116	115	tags=75%, list=4%, signal=72%	SYK/COL1A1/COL4A2
GO:0038065	BP	GO:0038065	collagen-activated signaling pathway	4	-0.903285476604789	-1.75562503361199	0.00307870962196086	0.321482099472123	0.311410199019116	115	tags=75%, list=4%, signal=72%	SYK/COL1A1/COL4A2
GO:0072567	BP	GO:0072567	chemokine (C-X-C motif) ligand 2 production	7	0.811395129316318	1.75223657772424	0.00289907208675084	0.321482099472123	0.311410199019116	439	tags=71%, list=14%, signal=61%	OAS1/MIF/CD74/HMGB1/MYD88
GO:2000341	BP	GO:2000341	regulation of chemokine (C-X-C motif) ligand 2 production	7	0.811395129316318	1.75223657772424	0.00289907208675084	0.321482099472123	0.311410199019116	439	tags=71%, list=14%, signal=61%	OAS1/MIF/CD74/HMGB1/MYD88
GO:0009142	BP	GO:0009142	nucleoside triphosphate biosynthetic process	52	0.458254869001119	1.64815898780545	0.00262224243267347	0.321482099472123	0.311410199019116	381	tags=28%, list=12%, signal=25%	NME2/TYMS/NDUFB11/NDUFS8/ATP5PO/NME1/NDUFA9/IMPDH2/AK4/NDUFS2/ATP5F1C/NDUFV1/ENO1/NDUFB5/NDUFA6
GO:0110095	BP	GO:0110095	cellular detoxification of aldehyde	4	0.886457441179417	1.61338476429626	0.00198749127108745	0.321482099472123	0.311410199019116	343	tags=75%, list=11%, signal=67%	RDH11/ALDH1A1/PARK7
GO:0060391	BP	GO:0060391	positive regulation of SMAD protein signal transduction	4	0.880631930825567	1.60278212370401	0.0025113167818965	0.321482099472123	0.311410199019116	16	tags=25%, list=1%, signal=25%	CSNK2B
GO:0001758	MF	GO:0001758	retinal dehydrogenase activity	4	0.875493420005602	1.59342984723479	0.00300433034980663	0.321482099472123	0.311410199019116	258	tags=75%, list=8%, signal=69%	ALDH1A3/AKR1B1/ALDH1A1
GO:0005956	CC	GO:0005956	protein kinase CK2 complex	3	0.953349159116573	1.57368680028318	0.00199866124259365	0.321482099472123	0.311410199019116	16	tags=33%, list=1%, signal=33%	CSNK2B
GO:1901163	BP	GO:1901163	regulation of trophoblast cell migration	3	0.945159856579438	1.56016877576616	0.00300609802687435	0.321482099472123	0.311410199019116	58	tags=33%, list=2%, signal=33%	ARHGDIB
GO:0008134	MF	GO:0008134	transcription factor binding	126	0.372774866502504	1.54849563243613	0.0021845965741903	0.321482099472123	0.311410199019116	567	tags=29%, list=18%, signal=25%	CSNK2B/TPT1/CRTC2/UBE2I/FLNA/DNAJA1/TCF4/HIF1AN/PCNA/EIF4E/BTAF1/ELOC/WFS1/FBL/DRAP1/STAT1/HSPB1/ELOB/HMGB1/ENO1/PARK7/MAPK14/RUVBL2/FLNA/SNW1/DDX54/STAT5A/PPID/NOP58/HDAC6/CREB1/TFAM/PADI2/HCLS1/DMAP1/STAT6/GTF2I
GO:0001775	BP	GO:0001775	cell activation	217	-0.324289125877074	-1.52608253580926	0.00273459838121939	0.321482099472123	0.311410199019116	395	tags=18%, list=13%, signal=17%	LAMP1/ITGA4/GNAQ/APOE/SPTA1/SART1/MSH2/CHGA/EMILIN2/ERBB2/BRD4/MYO18A/BAK1/F2/IKZF1/STOML2/DGKZ/IFI35/CAV1/PRKDC/MS4A1/FKBP1A/HBB/ADRA2A/HBB/MMP14/VAMP8/FGG/BPI/CELA2A/COL3A1/AP1G1/FGB/SNAP23/FKBP1A/FN1/CASP3/SUPT6H/FGA/ALKBH5
GO:0030020	MF	GO:0030020	extracellular matrix structural constituent conferring tensile strength	20	-0.66304656033712	-2.04037240608579	0.00360854899847119	0.324455562994376	0.314290505166056	250	tags=45%, list=8%, signal=42%	COL5A1/COL6A6/COL6A3/COL5A2/COL1A1/COL1A2/COL4A2/COL3A1/COL28A1/COL2A1
GO:0000028	BP	GO:0000028	ribosomal small subunit assembly	8	-0.7550767230334	-1.79182217984473	0.00352900506335644	0.324455562994376	0.314290505166056	206	tags=62%, list=7%, signal=58%	RPS14/RPS5/XRCC5/PRKDC/RPS27L
GO:0008307	MF	GO:0008307	structural constituent of muscle	15	0.654581307136718	1.78495685517311	0.00380221362884034	0.324455562994376	0.314290505166056	405	tags=41%, list=13%, signal=36%	TPM1/CSRP1/TPM2/ASPH/NEXN/DAG1/MYL9
GO:0048525	BP	GO:0048525	negative regulation of viral process	22	0.588920983781083	1.75889712419223	0.00340062502366778	0.324455562994376	0.314290505166056	416	tags=39%, list=14%, signal=34%	MX1/MX1/CSNK2B/OAS1/ISG15/FCN1/STAT1/SNX3/PPIA
GO:0000272	BP	GO:0000272	polysaccharide catabolic process	10	0.724662502655177	1.75192027176791	0.00378093754347329	0.324455562994376	0.314290505166056	676	tags=70%, list=22%, signal=55%	PYGM/MGAM/PPP1CA/PFKM/PYGL/PYGB/AGL
GO:0009251	BP	GO:0009251	glucan catabolic process	10	0.724662502655177	1.75192027176791	0.00378093754347329	0.324455562994376	0.314290505166056	676	tags=70%, list=22%, signal=55%	PYGM/MGAM/PPP1CA/PFKM/PYGL/PYGB/AGL
GO:1990825	MF	GO:1990825	sequence-specific mRNA binding	7	0.8076643969822	1.74417992884707	0.00344728429089398	0.324455562994376	0.314290505166056	453	tags=86%, list=15%, signal=73%	TYMS/SRSF4/FMR1/ETF1/DHFR/SSB
GO:0016114	BP	GO:0016114	terpenoid biosynthetic process	6	0.830992376138156	1.69484863165629	0.00320323537884837	0.324455562994376	0.314290505166056	79	tags=33%, list=3%, signal=33%	FDPS/ALDH1A3
GO:0097734	BP	GO:0097734	extracellular exosome biogenesis	8	0.760654605455464	1.69480244087222	0.00377603360238978	0.324455562994376	0.314290505166056	457	tags=62%, list=15%, signal=53%	SNF8/COPS5/RAB7A/RAB27A/VPS4B
GO:0140112	BP	GO:0140112	extracellular vesicle biogenesis	8	0.760654605455464	1.69480244087222	0.00377603360238978	0.324455562994376	0.314290505166056	457	tags=62%, list=15%, signal=53%	SNF8/COPS5/RAB7A/RAB27A/VPS4B
GO:1990182	BP	GO:1990182	exosomal secretion	8	0.760654605455464	1.69480244087222	0.00377603360238978	0.324455562994376	0.314290505166056	457	tags=62%, list=15%, signal=53%	SNF8/COPS5/RAB7A/RAB27A/VPS4B
GO:0043152	BP	GO:0043152	induction of bacterial agglutination	3	-0.943173114063186	-1.68623537230708	0.00349469839105649	0.324455562994376	0.314290505166056	39	tags=100%, list=1%, signal=99%	FGB/FGA
GO:1904028	BP	GO:1904028	positive regulation of collagen fibril organization	3	-0.941575169804844	-1.68337851592386	0.00366413628655107	0.324455562994376	0.314290505166056	173	tags=75%, list=6%, signal=71%	TNXB/TNXB/EFEMP2
GO:0043292	CC	GO:0043292	contractile fiber	80	0.40635034804526	1.58737924109295	0.00351779422228714	0.324455562994376	0.314290505166056	983	tags=50%, list=32%, signal=35%	FLNA/TPM1/CSRP1/PDLIM7/HSPB1/TPM2/CRYAB/DES/PGM5/ENO1/SYNPO/FLNA/CORO1C/NEXN/ILK/BAG3/DAG1/MYL9/PDLIM3/SYNPO2/LMOD1/ACTG1/CAB39/TMOD3/ACTA1/CAPZB/BIN1/ALDOA/CALM3/RPL15/SYNM/PPP2R5A/TWF1/DNAJB6/PPP1R12B/TPM4/TWF2/FLNC/ACTN4/PSMA6/PDLIM4/VCL/FLNB
GO:0010587	BP	GO:0010587	miRNA catabolic process	4	0.870925116988188	1.58511536969239	0.00325144460695813	0.324455562994376	0.314290505166056	281	tags=50%, list=9%, signal=45%	ELOC/ELOB
GO:0032309	BP	GO:0032309	icosanoid secretion	3	0.942575866081493	1.55590340069368	0.00349452957354762	0.324455562994376	0.314290505166056	81	tags=33%, list=3%, signal=32%	MIF
GO:1902679	BP	GO:1902679	negative regulation of RNA biosynthetic process	179	0.328254233813507	1.43097780295005	0.00344204282113754	0.324455562994376	0.314290505166056	1002	tags=43%, list=33%, signal=31%	DAP/UBE2I/FLNA/MAFG/HIF1AN/SARNP/PCNA/PRDX5/H1-2/BTAF1/WFS1/SRSF2/DRAP1/RBBP4/RPL10/STAT1/TRAF6/STRN3/CRYAB/H1-3/HMGB1/MNT/ENO1/RUVBL2/FLNA/COPS2/LIMD1/SNW1/RIOX2/DDX54/ELANE/PPID/NFKB1/HDAC6/SAMD1/CREB1/UHRF1/HCLS1/DMAP1/STAT6/DNAJB1/BIN1/PDCD4/HSPA8/SARS1/CCAR2/MACROH2A2/LANCL2/SF1/MEPCE/DNAJB6/PHB1/HDAC1/IMPACT/KDM1A/FOXK1/PSPC1/HCFC1/RFX5/DDX21/TDP2/SET/UBE2D3/HNRNPL/PPM1F/IRF2BP2/CHD3/CUL3/H…
GO:0030544	MF	GO:0030544	Hsp70 protein binding	15	0.653327040038817	1.78153663429267	0.00386026157290542	0.325904636623164	0.315694179920809	848	tags=73%, list=28%, signal=53%	DNAJA1/TFRC/NUP62/DNAJA2/BAG6/PPID/DNAJB1/CDK1/DNAJB6/DNAJC8/ST13
GO:0009611	BP	GO:0009611	response to wounding	156	-0.356446963843049	-1.59965135733534	0.00405146152205924	0.338446301463812	0.327842919618821	436	tags=27%, list=14%, signal=24%	LMAN1/PRKCD/SLC12A2/SERPINF2/COL5A1/GNAQ/APOE/VIL1/YAP1/APOA4/ANXA2/EMILIN2/ERBB2/F2/PTK7/SLC4A1/DGKZ/CAV1/CHMP4C/CHMP1A/TNC/FKBP10/PLG/HBB/FBLN1/MIA3/AHNAK/ITGB4/TPM1/ADRA2A/HBB/SERPIND1/FGG/S100A10/CHMP4B/CELA2A/COL3A1/FGB/F5/FN1/REG3G/CASP3/FGA
GO:0031639	BP	GO:0031639	plasminogen activation	11	-0.723272413984575	-1.90483881579337	0.00413509950063037	0.341834892052111	0.331125347073504	410	tags=73%, list=13%, signal=63%	SERPINF2/CTSZ/ANXA2/CLEC3B/FGG/S100A10/FGB/FGA
GO:0031490	MF	GO:0031490	chromatin DNA binding	29	0.547319225529442	1.72809716110647	0.00428001457795076	0.350166965882652	0.339196380496738	1083	tags=69%, list=35%, signal=45%	H2AC21/H1-2/RBBP4/H2AC18/H1-3/SMARCD2/RUVBL2/H2AZ2/H1-10/H2AX/HNRNPC/MACROH2A2/SMARCC1/HDAC1/SMARCB1/ACTN4/RCC1/SMARCA4/HNRNPU/DHX9
GO:0004128	MF	GO:0004128	cytochrome-b5 reductase activity, acting on NAD(P)H	3	0.935872395833333	1.54483802916139	0.00440896204995051	0.357035947228646	0.345850159514378	200	tags=100%, list=7%, signal=94%	CYB5R4/CYB5R1/CYB5R3
GO:0017081	MF	GO:0017081	chloride channel regulator activity	3	-0.935221354166667	-1.67201895900004	0.00455493854758965	0.361479923136715	0.350154907505761	203	tags=100%, list=7%, signal=93%	STX7/VAMP8
GO:0009117	BP	GO:0009117	nucleotide metabolic process	210	0.322453296935935	1.43989788062488	0.00453117449736953	0.361479923136715	0.350154907505761	1150	tags=46%, list=37%, signal=31%	ASMTL/NME2/TYMS/NT5C3A/PRPS2/NDUFB11/NDUFS8/RAN/ATP5PO/LDHB/GPI/ACSL1/SULT1A3/NME1/NUDT18/NDUFA9/NUDT4/IMPDH2/AK4/DCTPP1/NDUFS2/PRKACA/ATP5F1C/ACSS2/ACSL4/DPYD/NDUFV1/PGK1/ENO1/PARK7/NDUFB5/NDUFA6/FCSK/PNP/GART/GMPS/PFKM/NADK2/TKT/ACSS1/ATIC/PPCS/GCDH/HSPA8/ATP1A2/ALDOA/SLC25A1/PGD/NAXD/PRPS1/PRKAA1/DUT/AK3/ATP6V1B2/PTGIS/ME2/FOXK1/IDH1/NDUFS1/ATP5F1A/KARS1/CMPK1/MDH2/ADSL/PKM/ABHD14B/HSD17B4/PFK…
GO:0002761	BP	GO:0002761	regulation of myeloid leukocyte differentiation	19	0.610458818672385	1.74449477147154	0.00482167212664247	0.36793067304841	0.356403558105971	572	tags=47%, list=19%, signal=39%	NME2/CD101/PRXL2A/TRAF6/CD74/ACIN1/CREB1/HCLS1/INPP5D
GO:0022625	CC	GO:0022625	cytosolic large ribosomal subunit	41	0.492623411359914	1.68424693727445	0.00472972362900796	0.36793067304841	0.356403558105971	1007	tags=61%, list=33%, signal=42%	RPL26/RPL21/RPL24/RPL11/RPL13A/RPL9/RPL27A/RPL10/RPL10A/RPL35/RPL28/RPL27/RSL1D1/RPL23A/RPL15/RPL18/SNU13/RPL7/RPL3/RPL8/RPL17/RPL12/RPL38/RPL5/RPLP0
GO:0101002	CC	GO:0101002	ficolin-1-rich granule	108	0.379602538515226	1.55448857080342	0.00479182726843191	0.36793067304841	0.356403558105971	974	tags=48%, list=32%, signal=34%	CSNK2B/NME2/OSTF1/ILF2/MIF/AP2A2/PSMD12/SERPINB10/TCIRG1/ACTR10/GSDMD/GPI/PSMC3/FCN1/IMPDH2/LTA4H/HSP90AB1/HMGB1/FGL2/COTL1/EEF1A1/MAPK14/MGAM/DIAPH1/CSTB/PSMD2/PPIA/PNP/NCKAP1L/CAB39/PYGL/PSMD6/HSPA8/ALDOA/DDX3X/AGL/HSP90AA1/ARPC5/IDH1/PSMD14/TBC1D10C/PDAP1/CCT8/PKM/PSMD3/VCP/PFKL/ALDOC/PSMD7/PSMC2/BIN2/ASAH1/VCL
GO:0006753	BP	GO:0006753	nucleoside phosphate metabolic process	211	0.324359892072355	1.45079230877329	0.00470741481937002	0.36793067304841	0.356403558105971	1150	tags=46%, list=37%, signal=31%	ASMTL/NME2/TYMS/NT5C3A/PRPS2/NDUFB11/NDUFS8/RAN/ATP5PO/LDHB/GPI/ACSL1/SULT1A3/NME1/NUDT18/NDUFA9/NUDT4/IMPDH2/AK4/DCTPP1/NDUFS2/PRKACA/ATP5F1C/ACSS2/ACSL4/DPYD/NDUFV1/PGK1/ENO1/PARK7/NDUFB5/NDUFA6/FCSK/PNP/GART/GMPS/PFKM/NADK2/TKT/ACSS1/ATIC/PPCS/GCDH/HSPA8/ATP1A2/ALDOA/SLC25A1/PGD/NAXD/PRPS1/PRKAA1/DUT/AK3/ATP6V1B2/PTGIS/ME2/ENTPD1/FOXK1/IDH1/NDUFS1/ATP5F1A/KARS1/CMPK1/MDH2/ADSL/PKM/ABHD14B/HSD1…
GO:0043589	BP	GO:0043589	skin morphogenesis	5	-0.89640184742505	-1.84509306376522	0.0049659104466203	0.368312759854007	0.356773674290881	125	tags=60%, list=4%, signal=58%	ITGB4/COL1A1/COL1A2
GO:0044183	MF	GO:0044183	protein folding chaperone	34	0.511463344504651	1.68095012141286	0.0049322517690478	0.368312759854007	0.356773674290881	887	tags=54%, list=29%, signal=39%	HSPB6/TAPBP/HSPB1/CD74/HSP90AB1/CCT2/CCT3/TCP1/PFDN2/DNAJB1/HSPH1/HSPA8/HSPD1/CCT5/CCT3/HSP90AA1/DNAJB6/CCT8/CCT6A
GO:0016072	BP	GO:0016072	rRNA metabolic process	83	0.40025827600693	1.56481173393777	0.0049361176727893	0.368312759854007	0.356773674290881	1088	tags=52%, list=35%, signal=34%	RPL26/RPS6/DDX18/MRM1/RPL11/NPM3/RPS17/FBL/RPL10A/RPL35/EXOSC4/DDX54/NOP58/NOP56/UTP11/TBL3/MTREX/NCL/RPL27/RPS16/RSL1D1/SBDS/URB1/RPS7/MARS1/MACROH2A2/LSM6/SMARCB1/NOP2/PELO/DDX21/SNU13/RPL7/PELP1/RPS8/PA2G4/DDX17/SMARCA4/RPL5/NOB1/RPS25/DDX47/POLR1D
GO:0019229	BP	GO:0019229	regulation of vasoconstriction	12	-0.686033377674491	-1.85561164702478	0.005173363624547	0.370547221642297	0.358938131320789	187	tags=50%, list=6%, signal=47%	ITGA4/CAV1/ADRA2A/FGG/FGB/FGA
GO:1901873	BP	GO:1901873	regulation of post-translational protein modification	60	0.449703287761153	1.66184203349702	0.00522949707962919	0.370547221642297	0.358938131320789	752	tags=42%, list=24%, signal=32%	UBE2I/DNAJA1/COPS5/ISG15/RPL11/WNK1/PDCD6/WFS1/AIMP2/COPS6/TRAF6/HSP90AB1/U2AF2/DERL1/PARK7/COPS2/UBE2V1/PPIA/NXN/GPS1/RPS7/DDX3X/TRIM21/HSP90AA1/KDM1A
GO:0006364	BP	GO:0006364	rRNA processing	70	0.410639559324926	1.56566277632188	0.00514220653657013	0.370547221642297	0.358938131320789	1011	tags=49%, list=33%, signal=33%	RPL26/RPS6/DDX18/MRM1/RPL11/NPM3/RPS17/FBL/RPL10A/RPL35/EXOSC4/DDX54/NOP58/NOP56/UTP11/TBL3/MTREX/RPL27/RPS16/RSL1D1/SBDS/URB1/RPS7/LSM6/NOP2/DDX21/SNU13/RPL7/PELP1/RPS8/PA2G4/DDX17/RPL5/NOB1
GO:0021545	BP	GO:0021545	cranial nerve development	3	0.932971680225484	1.54004983816148	0.0051927642724424	0.370547221642297	0.358938131320789	169	tags=67%, list=5%, signal=63%	RPL24/TCIRG1
GO:0042254	BP	GO:0042254	ribosome biogenesis	105	0.376298479518961	1.52980683778699	0.0050601903513098	0.370547221642297	0.358938131320789	1101	tags=51%, list=36%, signal=34%	RPL26/RPS6/AFG2A/DDX18/RPS23/MRM1/XPO1/RPL11/NPM3/RAN/RPS17/FBL/RPL10/RPL10A/RPS9/RPL35/EXOSC4/RIOX2/DDX54/NOP58/DNTTIP2/NOP56/UTP11/TBL3/MTREX/RPL27/RPS16/RSL1D1/RPL23A/RPS11/SBDS/RPS15A/URB1/RPS7/DDX3X/LSM6/NOP2/DDX21/SNU13/RPL7/PELP1/RPS8/RPL38/PA2G4/DDX17/RPL5/RPLP0/NOB1/RPS25/ZNF593/RPS3A/DDX47/RPS13/ZNF622
GO:0050779	BP	GO:0050779	RNA destabilization	28	-0.630930292821475	-2.10248081608594	0.00582869516594052	0.384347459378291	0.372306013348851	62	tags=7%, list=2%, signal=7%	YBX1/ALKBH5
GO:0061157	BP	GO:0061157	mRNA destabilization	28	-0.630930292821475	-2.10248081608594	0.00582869516594052	0.384347459378291	0.372306013348851	62	tags=7%, list=2%, signal=7%	YBX1/ALKBH5
GO:0072577	BP	GO:0072577	endothelial cell apoptotic process	11	-0.70408567635529	-1.8543078652441	0.00558933341784529	0.384347459378291	0.372306013348851	461	tags=64%, list=15%, signal=54%	PAK4/CDH5/PLCG1/ITGA4/FGG/FGB/FGA
GO:2000351	BP	GO:2000351	regulation of endothelial cell apoptotic process	11	-0.70408567635529	-1.8543078652441	0.00558933341784529	0.384347459378291	0.372306013348851	461	tags=64%, list=15%, signal=54%	PAK4/CDH5/PLCG1/ITGA4/FGG/FGB/FGA
GO:0001958	BP	GO:0001958	endochondral ossification	6	-0.81101032033678	-1.79310598539625	0.00604753852625178	0.384347459378291	0.372306013348851	115	tags=83%, list=4%, signal=80%	TMEM119/MEF2D/COL1A1/MMP14/COL2A1
GO:0036075	BP	GO:0036075	replacement ossification	6	-0.81101032033678	-1.79310598539625	0.00604753852625178	0.384347459378291	0.372306013348851	115	tags=83%, list=4%, signal=80%	TMEM119/MEF2D/COL1A1/MMP14/COL2A1
GO:0042310	BP	GO:0042310	vasoconstriction	15	-0.634809388208867	-1.7879578530756	0.00605385993224374	0.384347459378291	0.372306013348851	187	tags=40%, list=6%, signal=38%	ITGA4/CAV1/ADRA2A/FGG/FGB/FGA
GO:0034361	CC	GO:0034361	very-low-density lipoprotein particle	9	-0.725000462902712	-1.78385690798847	0.00596249753175652	0.384347459378291	0.372306013348851	524	tags=78%, list=17%, signal=65%	APOBR/APOB/LSR/APOE/APOA1/APOA4/APOC3
GO:0034385	CC	GO:0034385	triglyceride-rich plasma lipoprotein particle	9	-0.725000462902712	-1.78385690798847	0.00596249753175652	0.384347459378291	0.372306013348851	524	tags=78%, list=17%, signal=65%	APOBR/APOB/LSR/APOE/APOA1/APOA4/APOC3
GO:0035025	BP	GO:0035025	positive regulation of Rho protein signal transduction	4	-0.888534424809193	-1.72695489944599	0.00563780707210641	0.384347459378291	0.372306013348851	314	tags=75%, list=10%, signal=67%	APOA1/ERBB2/COL3A1
GO:0097421	BP	GO:0097421	liver regeneration	8	0.746877155919961	1.66410512446304	0.00564891293959748	0.384347459378291	0.372306013348851	88	tags=25%, list=3%, signal=24%	TYMS/PCNA
GO:0004190	MF	GO:0004190	aspartic-type endopeptidase activity	3	-0.926083721398954	-1.65568240385197	0.0058319910141734	0.384347459378291	0.372306013348851	18	tags=67%, list=1%, signal=66%	NCSTN/CASP3
GO:0070001	MF	GO:0070001	aspartic-type peptidase activity	3	-0.926083721398954	-1.65568240385197	0.0058319910141734	0.384347459378291	0.372306013348851	18	tags=67%, list=1%, signal=66%	NCSTN/CASP3
GO:0016469	CC	GO:0016469	proton-transporting two-sector ATPase complex	20	0.582366968067974	1.68643960618331	0.00620306134945654	0.389352319628862	0.37715407340959	779	tags=50%, list=25%, signal=38%	ATP5PO/TCIRG1/ATP6V0D1/ATP5F1C/ATP6V1D/ATP6V1E1/ATP6V1F/ATP6V1B2/ATP5F1A/ATP6AP1
GO:0050920	BP	GO:0050920	regulation of chemotaxis	39	0.485526148509193	1.64707475389463	0.00627987612304616	0.389352319628862	0.37715407340959	496	tags=31%, list=16%, signal=26%	MIF/WNK1/CXCL12/HSPB1/CD74/CORO1B/HMGB1/ELANE/HDAC6/NCKAP1L/PADI2/RAC2
GO:0007398	BP	GO:0007398	ectoderm development	5	0.841786975875563	1.63976875650478	0.00623393345210215	0.389352319628862	0.37715407340959	175	tags=40%, list=6%, signal=38%	TPT1/VPS52
GO:0000079	BP	GO:0000079	regulation of cyclin-dependent protein serine/threonine kinase activity	8	0.741959045186204	1.6531471600778	0.00637509108927115	0.3921916502671	0.379904448999977	101	tags=38%, list=3%, signal=36%	CDKN2C/IPO5/CDK7
GO:0045453	BP	GO:0045453	bone resorption	18	0.610746384494842	1.72526760553162	0.00677241427807707	0.392305691319851	0.380014917193982	572	tags=44%, list=19%, signal=36%	TFRC/TCIRG1/SLC4A2/CSK/TRAF6/RAB7A/RAC2/INPP5D
GO:0033700	BP	GO:0033700	phospholipid efflux	4	-0.878866818625855	-1.70816494669001	0.00673784473162546	0.392305691319851	0.380014917193982	377	tags=100%, list=12%, signal=88%	APOA1/APOA4/APOC3
GO:0034370	BP	GO:0034370	triglyceride-rich lipoprotein particle remodeling	4	-0.878866818625855	-1.70816494669001	0.00673784473162546	0.392305691319851	0.380014917193982	377	tags=100%, list=12%, signal=88%	APOA1/APOA4/APOC3
GO:0034372	BP	GO:0034372	very-low-density lipoprotein particle remodeling	4	-0.878866818625855	-1.70816494669001	0.00673784473162546	0.392305691319851	0.380014917193982	377	tags=100%, list=12%, signal=88%	APOA1/APOA4/APOC3
GO:0034375	BP	GO:0034375	high-density lipoprotein particle remodeling	4	-0.878866818625855	-1.70816494669001	0.00673784473162546	0.392305691319851	0.380014917193982	377	tags=100%, list=12%, signal=88%	APOA1/APOA4/APOC3
GO:0031396	BP	GO:0031396	regulation of protein ubiquitination	45	0.47715811282402	1.65266077847435	0.0066231012073793	0.392305691319851	0.380014917193982	752	tags=42%, list=24%, signal=32%	DNAJA1/ISG15/RPL11/WNK1/PDCD6/WFS1/AIMP2/TRAF6/HSP90AB1/U2AF2/DERL1/PARK7/UBE2V1/PPIA/NXN/RPS7/DDX3X/HSP90AA1/KDM1A
GO:0042060	BP	GO:0042060	wound healing	130	-0.371400497623907	-1.63403319130667	0.00653214460063732	0.392305691319851	0.380014917193982	436	tags=29%, list=14%, signal=26%	LMAN1/PRKCD/SLC12A2/SERPINF2/COL5A1/GNAQ/APOE/VIL1/YAP1/ANXA2/EMILIN2/ERBB2/F2/PTK7/SLC4A1/DGKZ/CAV1/CHMP4C/CHMP1A/FKBP10/PLG/HBB/FBLN1/MIA3/AHNAK/TPM1/ADRA2A/HBB/SERPIND1/FGG/S100A10/CHMP4B/CELA2A/COL3A1/FGB/F5/FN1/REG3G/FGA
GO:0033211	BP	GO:0033211	adiponectin-activated signaling pathway	3	0.92714697681914	1.53043504091907	0.0067610164584892	0.392305691319851	0.380014917193982	201	tags=67%, list=7%, signal=62%	CSNK2B/ACSL1
GO:0070207	BP	GO:0070207	protein homotrimerization	5	0.832710744775412	1.622088606287	0.0068511353282656	0.393989927283448	0.381646386745414	81	tags=20%, list=3%, signal=20%	MIF
GO:0016485	BP	GO:0016485	protein processing	59	-0.496045055459251	-1.89067601363689	0.00699672410089107	0.396614303319082	0.384188542171485	504	tags=37%, list=16%, signal=32%	SDE2/CPD/ENPEP/AEBP1/ACTMAP/SERPINF2/CTSZ/MME/ANXA2/BAK1/GGT1/PITRM1/STOML2/SPCS3/MMP14/CLEC3B/GLG1/FGG/S100A10/FGB/CASP3/FGA
GO:0030295	MF	GO:0030295	protein kinase activator activity	22	0.56553003651454	1.68903669976805	0.00694970408723332	0.396614303319082	0.384188542171485	905	tags=55%, list=29%, signal=39%	MOB3A/WNK1/MOB2/ACSL1/NCKAP1L/CAB39/PAK2/CALM3/DDX3X/LTF/ABI1/AGAP2
GO:0032451	MF	GO:0032451	demethylase activity	4	-0.877073759072758	-1.70467995737079	0.0071961946712219	0.400085486322832	0.387550974455598	2	tags=50%, list=0%, signal=50%	PHF2/ALKBH5
GO:0050792	BP	GO:0050792	regulation of viral process	45	0.476093429947419	1.64897319655049	0.0072092016814724	0.400085486322832	0.387550974455598	722	tags=43%, list=23%, signal=34%	MX1/MX1/CSNK2B/OAS1/ISG15/FMR1/FCN1/STAT1/CD74/RAB7A/HMGB1/SNX3/PPID/PPIA/OAS2/ADAR/DDX3X/STOM/TRIM21/PABPC1
GO:0044058	BP	GO:0044058	regulation of digestive system process	4	0.843737547356351	1.53563300473656	0.00715736448966576	0.400085486322832	0.387550974455598	147	tags=50%, list=5%, signal=48%	SPINK1/WNK1
GO:0031093	CC	GO:0031093	platelet alpha granule lumen	35	-0.536393931725482	-1.86742236305263	0.00737521693298282	0.403125089047026	0.390495347690793	176	tags=22%, list=6%, signal=21%	QSOX1/PLG/FGG/FGB/F5/FN1/CFD/FGA
GO:0009206	BP	GO:0009206	purine ribonucleoside triphosphate biosynthetic process	43	0.461883565333084	1.58475061851268	0.00746716079762005	0.403125089047026	0.390495347690793	381	tags=30%, list=12%, signal=26%	NME2/NDUFB11/NDUFS8/ATP5PO/NME1/NDUFA9/IMPDH2/NDUFS2/ATP5F1C/NDUFV1/ENO1/NDUFB5/NDUFA6
GO:0044391	CC	GO:0044391	ribosomal subunit	97	0.372638142210603	1.49993520301332	0.00737607049777498	0.403125089047026	0.390495347690793	938	tags=42%, list=31%, signal=30%	RPS10/RPL26/RPL21/RPL24/RPS6/MRPL1/RPS23/RPL11/RPL13A/RPS17/RPL9/MRPL19/RPL27A/RPS26/RPL10/RPL10A/RPS9/RPL35/RPL28/GADD45GIP1/RPL27/RPS16/RSL1D1/RPL23A/RPS11/RPS15A/RPS7/RPS29/DDX3X/RPL15/MRPL10/RPL18/SNU13/RPL7/RPL3/MRPL4/RPS8/RPL8/RPL17/RPL12/RPL38
GO:0045892	BP	GO:0045892	negative regulation of DNA-templated transcription	178	0.331133453793768	1.44405175392506	0.00744362947445838	0.403125089047026	0.390495347690793	1002	tags=43%, list=33%, signal=31%	DAP/UBE2I/FLNA/MAFG/HIF1AN/SARNP/PCNA/PRDX5/H1-2/BTAF1/WFS1/SRSF2/DRAP1/RBBP4/RPL10/STAT1/TRAF6/STRN3/CRYAB/H1-3/HMGB1/MNT/ENO1/RUVBL2/FLNA/COPS2/LIMD1/SNW1/RIOX2/DDX54/ELANE/PPID/NFKB1/HDAC6/SAMD1/CREB1/UHRF1/HCLS1/DMAP1/STAT6/DNAJB1/BIN1/PDCD4/HSPA8/SARS1/CCAR2/MACROH2A2/LANCL2/SF1/MEPCE/DNAJB6/PHB1/HDAC1/IMPACT/KDM1A/FOXK1/PSPC1/HCFC1/RFX5/DDX21/TDP2/SET/UBE2D3/HNRNPL/PPM1F/IRF2BP2/CHD3/CUL3/H…
GO:0033178	CC	GO:0033178	proton-transporting two-sector ATPase complex, catalytic domain	11	0.688636736291759	1.70432644452814	0.00761145375989291	0.408138493503447	0.395351684270967	770	tags=64%, list=25%, signal=48%	ATP5PO/ATP5F1C/ATP6V1D/ATP6V1E1/ATP6V1F/ATP6V1B2/ATP5F1A
GO:0045047	BP	GO:0045047	protein targeting to ER	12	-0.66601878618048	-1.80147534652491	0.0076874604242163	0.409447556554232	0.396619734920887	217	tags=42%, list=7%, signal=39%	MAN1A1/SRPRB/SPCS3/SEC61A1/CHMP4B
GO:1904029	BP	GO:1904029	regulation of cyclin-dependent protein kinase activity	9	0.722104842024102	1.67564867544339	0.0077437865812951	0.409697935394386	0.396862269496127	272	tags=44%, list=9%, signal=41%	CDKN2C/IPO5/CDK7/HSP90AB1
GO:1904813	CC	GO:1904813	ficolin-1-rich granule lumen	86	0.394126938988275	1.54967419819853	0.00780840349691645	0.410380729480324	0.397523671927367	974	tags=52%, list=32%, signal=37%	CSNK2B/NME2/OSTF1/ILF2/MIF/PSMD12/ACTR10/GSDMD/GPI/PSMC3/FCN1/IMPDH2/LTA4H/HSP90AB1/HMGB1/FGL2/COTL1/EEF1A1/MAPK14/CSTB/PSMD2/PPIA/PNP/CAB39/PYGL/PSMD6/HSPA8/ALDOA/DDX3X/AGL/HSP90AA1/ARPC5/IDH1/PSMD14/PDAP1/CCT8/PKM/PSMD3/VCP/PFKL/ALDOC/PSMD7/PSMC2/BIN2/ASAH1/VCL
GO:0031638	BP	GO:0031638	zymogen activation	19	-0.656186382042239	-1.99865149108957	0.00871704747767933	0.41379198385194	0.400828053118464	410	tags=58%, list=13%, signal=50%	SERPINF2/CTSZ/ANXA2/BAK1/GGT1/MMP14/CLEC3B/FGG/S100A10/FGB/FGA
GO:0050818	BP	GO:0050818	regulation of coagulation	26	-0.597105417290543	-1.97268700199944	0.0111450548777138	0.41379198385194	0.400828053118464	429	tags=58%, list=14%, signal=50%	VTN/CD9/EMILIN1/TMX1/PRKCD/SERPINF2/APOE/ANXA2/EMILIN2/F2/CAV1/PLG/FGG/FGB/FGA
GO:0005604	CC	GO:0005604	basement membrane	41	-0.541374994364809	-1.93501325879011	0.0100390110858641	0.41379198385194	0.400828053118464	384	tags=31%, list=12%, signal=27%	COL5A1/LAD1/ANXA2/VWA1/TNC/MMRN2/FBLN1/ITGB4/EFEMP2/COL4A2/COL28A1/FN1/COL2A1
GO:0031091	CC	GO:0031091	platelet alpha granule	43	-0.520913155155661	-1.89336195772911	0.00868168121853728	0.41379198385194	0.400828053118464	193	tags=23%, list=6%, signal=22%	PCDH7/QSOX1/PLG/FGG/PECAM1/FGB/F5/FN1/CFD/FGA
GO:0042098	BP	GO:0042098	T cell proliferation	42	-0.520025443705239	-1.87893172391681	0.00905640600914474	0.41379198385194	0.400828053118464	18	tags=5%, list=1%, signal=5%	CASP3/ALKBH5
GO:0050819	BP	GO:0050819	negative regulation of coagulation	20	-0.598138077122162	-1.8406315643486	0.0097217177774597	0.41379198385194	0.400828053118464	429	tags=45%, list=14%, signal=39%	PRKCD/SERPINF2/APOE/ANXA2/F2/PLG/FGG/FGB/FGA
GO:0051291	BP	GO:0051291	protein heterooligomerization	10	-0.719595733461723	-1.82862205024525	0.0114593123567988	0.41379198385194	0.400828053118464	443	tags=80%, list=14%, signal=69%	RRM1/CD2AP/FARSA/NUDT21/CPSF6/RRM2/CPSF7/COL1A2
GO:0015293	MF	GO:0015293	symporter activity	7	-0.766238875892613	-1.76619773826401	0.00867278194389046	0.41379198385194	0.400828053118464	413	tags=57%, list=13%, signal=50%	SLC12A2/SLC4A4/SLC25A3/SLC25A22
GO:0015294	MF	GO:0015294	solute:monoatomic cation symporter activity	6	-0.794699612140435	-1.75704377045332	0.00970505400497057	0.41379198385194	0.400828053118464	413	tags=67%, list=13%, signal=58%	SLC12A2/SLC4A4/SLC25A3/SLC25A22
GO:0001727	MF	GO:0001727	lipid kinase activity	6	-0.791515183592137	-1.75000314748363	0.0102703796847793	0.41379198385194	0.400828053118464	235	tags=67%, list=8%, signal=62%	PIK3R1/PI4KA/DGKZ/PIP4K2A
GO:0051290	BP	GO:0051290	protein heterotetramerization	7	-0.759024626707711	-1.74956873261769	0.00989349579170434	0.41379198385194	0.400828053118464	347	tags=86%, list=11%, signal=76%	RRM1/FARSA/NUDT21/CPSF6/RRM2/CPSF7
GO:0043394	MF	GO:0043394	proteoglycan binding	15	-0.618719631131599	-1.74264061603607	0.00941139798856245	0.41379198385194	0.400828053118464	384	tags=47%, list=12%, signal=41%	COL5A1/APOE/FCN2/CFH/TNC/FN1/COL2A1
GO:0044088	BP	GO:0044088	regulation of vacuole organization	15	-0.616998656489148	-1.73779344429591	0.00992011737668906	0.41379198385194	0.400828053118464	80	tags=47%, list=3%, signal=46%	SH3GLB1/SEC22B/ANXA2/PIP4K2A/RAB5A/SNX18/RALB
GO:0000815	CC	GO:0000815	ESCRT III complex	6	-0.785854921288701	-1.73748857157664	0.0114010335405752	0.41379198385194	0.400828053118464	174	tags=67%, list=6%, signal=63%	CHMP6/CHMP4C/CHMP1A/CHMP4B
GO:0044753	CC	GO:0044753	amphisome	6	-0.785854921288701	-1.73748857157664	0.0114010335405752	0.41379198385194	0.400828053118464	174	tags=67%, list=6%, signal=63%	CHMP6/CHMP4C/CHMP1A/CHMP4B
GO:0051469	BP	GO:0051469	vesicle fusion with vacuole	6	-0.785854921288701	-1.73748857157664	0.0114010335405752	0.41379198385194	0.400828053118464	174	tags=67%, list=6%, signal=63%	CHMP6/CHMP4C/CHMP1A/CHMP4B
GO:0061763	BP	GO:0061763	multivesicular body-lysosome fusion	6	-0.785854921288701	-1.73748857157664	0.0114010335405752	0.41379198385194	0.400828053118464	174	tags=67%, list=6%, signal=63%	CHMP6/CHMP4C/CHMP1A/CHMP4B
GO:0097212	BP	GO:0097212	lysosomal membrane organization	6	-0.785854921288701	-1.73748857157664	0.0114010335405752	0.41379198385194	0.400828053118464	174	tags=67%, list=6%, signal=63%	CHMP6/CHMP4C/CHMP1A/CHMP4B
GO:0097576	BP	GO:0097576	vacuole fusion	6	-0.785854921288701	-1.73748857157664	0.0114010335405752	0.41379198385194	0.400828053118464	174	tags=67%, list=6%, signal=63%	CHMP6/CHMP4C/CHMP1A/CHMP4B
GO:1904930	CC	GO:1904930	amphisome membrane	6	-0.785854921288701	-1.73748857157664	0.0114010335405752	0.41379198385194	0.400828053118464	174	tags=67%, list=6%, signal=63%	CHMP6/CHMP4C/CHMP1A/CHMP4B
GO:0048706	BP	GO:0048706	embryonic skeletal system development	9	-0.703879089255812	-1.73188796422342	0.00916182827195155	0.41379198385194	0.400828053118464	259	tags=56%, list=8%, signal=51%	EIF4A3/KIAA1217/COL1A1/MMP14/COL2A1
GO:0005828	CC	GO:0005828	kinetochore microtubule	8	-0.716860304264888	-1.70113334691586	0.0108114891174444	0.41379198385194	0.400828053118464	174	tags=50%, list=6%, signal=47%	CHMP6/CHMP4C/CHMP1A/CHMP4B
GO:0039702	BP	GO:0039702	viral budding via host ESCRT complex	9	-0.689656605425868	-1.69689367480294	0.0115941713542704	0.41379198385194	0.400828053118464	174	tags=56%, list=6%, signal=53%	CHMP6/CHMP4C/CHMP1A/VPS37C/CHMP4B
GO:0046755	BP	GO:0046755	viral budding	9	-0.689656605425868	-1.69689367480294	0.0115941713542704	0.41379198385194	0.400828053118464	174	tags=56%, list=6%, signal=53%	CHMP6/CHMP4C/CHMP1A/VPS37C/CHMP4B
GO:0030492	MF	GO:0030492	hemoglobin binding	4	-0.872607448160496	-1.69599923854098	0.00838790620692999	0.41379198385194	0.400828053118464	218	tags=80%, list=7%, signal=74%	SLC4A1/HBB/HBB/HP
GO:0009595	BP	GO:0009595	detection of biotic stimulus	4	-0.863853931480013	-1.67898590951662	0.0098573400652255	0.41379198385194	0.400828053118464	320	tags=75%, list=10%, signal=67%	PGLYRP1/YAP1/CDHR2
GO:0098930	BP	GO:0098930	axonal transport	16	0.606171052480242	1.67629444611603	0.00832977381664856	0.41379198385194	0.400828053118464	697	tags=56%, list=23%, signal=44%	BLOC1S3/ACTR10/HSPB1/SPG7/HDAC6/AP3S1/PAFAH1B1/SOD1/MAP1A
GO:2000049	BP	GO:2000049	positive regulation of cell-cell adhesion mediated by cadherin	4	-0.861608596548356	-1.67462187808143	0.0104100724422917	0.41379198385194	0.400828053118464	430	tags=100%, list=14%, signal=86%	SERPINF2/FLOT1/TJP1
GO:0031690	MF	GO:0031690	adrenergic receptor binding	4	-0.859688705226755	-1.67089037862382	0.0107785611276821	0.41379198385194	0.400828053118464	203	tags=75%, list=7%, signal=70%	GNAS/NHERF1/ADRA2A
GO:0042117	BP	GO:0042117	monocyte activation	4	-0.85621964504769	-1.66414791563596	0.0116997841210235	0.41379198385194	0.400828053118464	25	tags=50%, list=1%, signal=50%	DYSF/FN1
GO:0009148	BP	GO:0009148	pyrimidine nucleoside triphosphate biosynthetic process	9	0.715074511014506	1.6593347495997	0.00990480473885259	0.41379198385194	0.400828053118464	227	tags=33%, list=7%, signal=31%	NME2/TYMS/NME1
GO:0005980	BP	GO:0005980	glycogen catabolic process	9	0.714280689075119	1.65749268096387	0.0102649751243582	0.41379198385194	0.400828053118464	676	tags=67%, list=22%, signal=52%	PYGM/PPP1CA/PFKM/PYGL/PYGB/AGL
GO:0030239	BP	GO:0030239	myofibril assembly	17	0.592423605827624	1.65342679432663	0.0116936894330771	0.41379198385194	0.400828053118464	556	tags=47%, list=18%, signal=39%	TPM1/CSRP1/PGM5/MYL9/LMOD1/ACTG1/TMOD3/ACTA1/WDR1
GO:0055002	BP	GO:0055002	striated muscle cell development	17	0.592423605827624	1.65342679432663	0.0116936894330771	0.41379198385194	0.400828053118464	556	tags=47%, list=18%, signal=39%	TPM1/CSRP1/PGM5/MYL9/LMOD1/ACTG1/TMOD3/ACTA1/WDR1
GO:2001243	BP	GO:2001243	negative regulation of intrinsic apoptotic signaling pathway	37	0.492358092771006	1.65160215732208	0.00970655764458645	0.41379198385194	0.400828053118464	752	tags=54%, list=24%, signal=41%	TPT1/DNAJA1/MIF/GPX1/WFS1/CXCL12/HSPB1/CD74/ENO1/PARK7/PPIA/SOD2/VDAC2/CLU/ARMC10/CD44/DDX3X/CCAR2/HDAC1/KDM1A
GO:0019884	BP	GO:0019884	antigen processing and presentation of exogenous antigen	10	0.682468567290212	1.64991359908828	0.0105909811986067	0.41379198385194	0.400828053118464	467	tags=45%, list=15%, signal=39%	IKBKB/TAP2/TRAF6/CD74/LNPEP
GO:0019209	MF	GO:0019209	kinase activator activity	23	0.549326371731894	1.64989840739613	0.0113221652804996	0.41379198385194	0.400828053118464	905	tags=52%, list=29%, signal=37%	MOB3A/WNK1/MOB2/ACSL1/NCKAP1L/CAB39/PAK2/CALM3/DDX3X/LTF/ABI1/AGAP2
GO:0030316	BP	GO:0030316	osteoclast differentiation	20	0.569330262605186	1.64868743679168	0.00921755981092639	0.41379198385194	0.400828053118464	797	tags=60%, list=26%, signal=45%	TFRC/PRXL2A/TCIRG1/SLC4A2/TRAF6/MAPK14/CREB1/GLO1/INPP5D/PAFAH1B1/ATP6AP1/LTF
GO:0035601	BP	GO:0035601	protein deacylation	12	0.648311558108842	1.64397144120401	0.00895880089393808	0.41379198385194	0.400828053118464	742	tags=69%, list=24%, signal=53%	FLNA/ABHD10/FNTA/FLNA/HDAC6/PRKAA1/CCAR2/LYPLA1/HDAC1
GO:0009566	BP	GO:0009566	fertilization	32	0.505451256566916	1.63889963658633	0.0117317535744313	0.41379198385194	0.400828053118464	1082	tags=68%, list=35%, signal=44%	FNDC3A/SPINK1/UBAP2L/CCT2/PARK7/CCT3/TCP1/VDAC2/INTS13/CLIC4/ALDOA/CCT5/MFGE8/CDK1/CCT3/CRKL/HEXB/SNU13/CCT8/CCT7/ALDOA/MYH9/AP3B1
GO:0036022	BP	GO:0036022	limb joint morphogenesis	3	-0.91556830849816	-1.63688260885851	0.00855638409273037	0.41379198385194	0.400828053118464	42	tags=67%, list=1%, signal=66%	COL6A1/COL3A1
GO:1904627	BP	GO:1904627	response to phorbol 13-acetate 12-myristate	3	-0.915146541359405	-1.63612855993829	0.00881263524589282	0.41379198385194	0.400828053118464	3	tags=67%, list=0%, signal=67%	FBP1/CDK4
GO:1904628	BP	GO:1904628	cellular response to phorbol 13-acetate 12-myristate	3	-0.915146541359405	-1.63612855993829	0.00881263524589282	0.41379198385194	0.400828053118464	3	tags=67%, list=0%, signal=67%	FBP1/CDK4
GO:0019883	BP	GO:0019883	antigen processing and presentation of endogenous antigen	7	0.757086498673146	1.63495516246696	0.0110979585443819	0.41379198385194	0.400828053118464	576	tags=86%, list=19%, signal=70%	TAP2/TAPBP/IDE/CD74/TAP1/ERAP1
GO:0061077	BP	GO:0061077	chaperone-mediated protein folding	41	0.474645818986556	1.62278273521631	0.00904526043789832	0.41379198385194	0.400828053118464	887	tags=55%, list=29%, signal=40%	SDF2/HSPB6/PFDN6/PTGES3/HSPB1/CD74/PDCD5/CCT2/PPID/CCT3/TCP1/PFDN2/DNAJB1/HSPH1/CLU/HSPA8/CCT5/ERO1A/CCT3/DNAJB6/CCT8/ST13/CCT6A
GO:0070525	BP	GO:0070525	tRNA threonylcarbamoyladenosine metabolic process	6	0.795457279810732	1.62237310586844	0.00987167803408981	0.41379198385194	0.400828053118464	307	tags=67%, list=10%, signal=60%	PUS1/HSD17B10/TP53RK/TRMT5
GO:0006473	BP	GO:0006473	protein acetylation	12	0.63840141735531	1.61884156626449	0.0111233140562735	0.41379198385194	0.400828053118464	712	tags=58%, list=23%, signal=45%	PARK7/BAG6/HDAC6/DDX3X/PRKAA1/GTF2B/NAA50
GO:0045071	BP	GO:0045071	negative regulation of viral genome replication	12	0.638034994453864	1.61791240068376	0.0111233140562735	0.41379198385194	0.400828053118464	124	tags=31%, list=4%, signal=30%	MX1/MX1/OAS1/ISG15
GO:0045637	BP	GO:0045637	regulation of myeloid cell differentiation	36	0.481729319038854	1.60384917176945	0.00847935436291693	0.41379198385194	0.400828053118464	572	tags=36%, list=19%, signal=30%	NME2/CD101/ISG15/PRXL2A/STAT1/TRAF6/CD74/MAPK14/ACIN1/NCKAP1L/CREB1/HCLS1/INPP5D
GO:2000343	BP	GO:2000343	positive regulation of chemokine (C-X-C motif) ligand 2 production	5	0.81828247439276	1.59398288873386	0.00993716180214347	0.41379198385194	0.400828053118464	319	tags=60%, list=10%, signal=54%	MIF/CD74/HMGB1
GO:0016653	MF	GO:0016653	oxidoreductase activity, acting on NAD(P)H, heme protein as acceptor	4	0.838177658667365	1.5255138052293	0.00865104094439561	0.41379198385194	0.400828053118464	200	tags=75%, list=7%, signal=70%	CYB5R4/CYB5R1/CYB5R3
GO:0048012	BP	GO:0048012	hepatocyte growth factor receptor signaling pathway	3	0.917940898287748	1.51523863136788	0.00833635411797794	0.41379198385194	0.400828053118464	59	tags=33%, list=2%, signal=33%	STMN1
GO:0006183	BP	GO:0006183	GTP biosynthetic process	4	0.831984691582776	1.51424238003062	0.00989577491407147	0.41379198385194	0.400828053118464	256	tags=75%, list=8%, signal=69%	NME2/NME1/IMPDH2
GO:0070106	BP	GO:0070106	interleukin-27-mediated signaling pathway	4	0.83072037832342	1.51194128394277	0.0103936691313761	0.41379198385194	0.400828053118464	228	tags=80%, list=7%, signal=74%	MX1/MX1/OAS1/STAT1
GO:0015631	MF	GO:0015631	tubulin binding	85	0.384946555132275	1.51118433336467	0.0108052258012102	0.41379198385194	0.400828053118464	768	tags=34%, list=25%, signal=26%	MX1/MX1/STMN1/S100A9/FMR1/DRG1/CRYAB/RAE1/TBCC/PDCD5/FNTA/TBCB/MAP1S/CLIP1/DAG1/HDAC6/GOLGA2/NCALD/CLIP2/HSPH1/ALDOA/SBDS/CCT5/PAFAH1B1/HTT/RCC2/DDX3X/MAP1A/TBCA/MAPRE2
GO:0051450	BP	GO:0051450	myoblast proliferation	4	0.8282165494416	1.50738422436757	0.011016037300223	0.41379198385194	0.400828053118464	164	tags=25%, list=5%, signal=24%	GPX1
GO:0035251	MF	GO:0035251	UDP-glucosyltransferase activity	3	0.911847418084133	1.50518016614292	0.00964914050623424	0.41379198385194	0.400828053118464	108	tags=67%, list=4%, signal=64%	UGGT1/POGLUT3
GO:0043383	BP	GO:0043383	negative T cell selection	4	0.826561308553248	1.50437162578534	0.0111405109810374	0.41379198385194	0.400828053118464	257	tags=50%, list=8%, signal=46%	PTPRC/CD74
GO:0045059	BP	GO:0045059	positive thymic T cell selection	4	0.826561308553248	1.50437162578534	0.0111405109810374	0.41379198385194	0.400828053118464	257	tags=50%, list=8%, signal=46%	PTPRC/CD74
GO:0045060	BP	GO:0045060	negative thymic T cell selection	4	0.826561308553248	1.50437162578534	0.0111405109810374	0.41379198385194	0.400828053118464	257	tags=50%, list=8%, signal=46%	PTPRC/CD74
GO:0045061	BP	GO:0045061	thymic T cell selection	4	0.826561308553248	1.50437162578534	0.0111405109810374	0.41379198385194	0.400828053118464	257	tags=50%, list=8%, signal=46%	PTPRC/CD74
GO:0060008	BP	GO:0060008	Sertoli cell differentiation	4	0.823745563765403	1.49924686792351	0.0116384058443415	0.41379198385194	0.400828053118464	360	tags=60%, list=12%, signal=53%	FNDC3A/FLNA/FLNA
GO:0045777	BP	GO:0045777	positive regulation of blood pressure	3	0.904793546289553	1.4935363892246	0.0114870459494803	0.41379198385194	0.400828053118464	147	tags=50%, list=5%, signal=48%	TPM1/WNK1
GO:0007250	BP	GO:0007250	activation of NF-kappaB-inducing kinase activity	3	0.904622395833333	1.49325387236156	0.0116183250538507	0.41379198385194	0.400828053118464	296	tags=100%, list=10%, signal=90%	CHI3L1/TRAF6/ZFP91
GO:0072522	BP	GO:0072522	purine-containing compound biosynthetic process	93	0.367710370964148	1.46546492752803	0.0115171483261185	0.41379198385194	0.400828053118464	770	tags=36%, list=25%, signal=28%	NME2/PRPS2/NDUFB11/NDUFS8/ATP5PO/ACSL1/NME1/NDUFA9/IMPDH2/AK4/NDUFS2/ATP5F1C/ACSS2/ACSL4/NDUFV1/ENO1/NDUFB5/NDUFA6/PNP/GART/GMPS/NADK2/ACSS1/ATIC/PPCS/GCDH/ALDOA/SLC25A1/NAXD/PRPS1/AK3/PTGIS/NDUFS1/ATP5F1A
GO:0009615	BP	GO:0009615	response to virus	97	0.361629527384285	1.4556235584338	0.01143002920111	0.41379198385194	0.400828053118464	758	tags=37%, list=25%, signal=29%	MX1/MX1/TPT1/IKBKB/OAS1/NT5C3A/STMN1/IFI44L/ISG15/CFL1/FMR1/PTPRC/CXCL12/STAT1/TRAF6/HSPB1/FGL2/ENO1/MAPK14/EXOSC4/MYD88/NFKB1/SLFN11/CLU/OAS2/RPS15A/CCT5/ADAR/DDX3X/RIGI/WDFY4/EIF5A/TRIM21/HSP90AA1/PHB1/DHX58
GO:0042176	BP	GO:0042176	regulation of protein catabolic process	99	0.359737639780909	1.45181241051092	0.0115342116143974	0.41379198385194	0.400828053118464	942	tags=45%, list=31%, signal=32%	FLNA/SNF8/XPO1/RPL11/FMR1/GPX1/WFS1/PSMC3/PSMC1/IDE/RAB7A/HSP90AB1/ELOB/PRKACA/PSME3/SNX3/PARK7/EEF1A1/DDA1/FLNA/BAG6/PSMD2/SNX12/PSME2/GPLD1/PSMC6/CLU/CCAR2/SORL1/MAP1A/SMARCC1/HSP90AA1/PHB1/GFAP/PSMD14/NUB1/NSF/PSMD3/VCP/UBE2K/AGAP2/C4BPA/EEF1A2/USP9X/PSMC2
GO:0140535	CC	GO:0140535	intracellular protein-containing complex	212	0.313631544786247	1.4052328508518	0.0085648241814346	0.41379198385194	0.400828053118464	846	tags=37%, list=28%, signal=29%	SDF2/CSNK2B/BLOC1S3/CDK7/PSMD12/EIF4E/PFDN6/PDCD6/ELOC/WASHC4/AIMP2/PSMC3/PRKAR2B/RPAP3/HSD17B10/TRAPPC3/PSMC1/CUL9/PSMB10/PTGES3/HSPB1/HSP90AB1/ELOB/PRKACA/EIF2B3/CCT2/PSME3/DERL1/FNTA/BRCC3/POLR1C/RUVBL2/DDA1/PPP3R1/PSMD2/BAG3/OS9/FBXO6/UBE2V1/PSMA7/CCT3/NFKB1/POLD2/PSME2/TRAPPC4/ACTG1/TCP1/PFDN2/PSMB4/PSMC6/RTCB/DMAP1/CAMK2B/PSMD6/HSPA8/CCT5/EIF4A1/TCEA1/STIP1/DCAF7/MARS1/PRKAA1/UBE4A/CCAR2/TR…
GO:0048471	CC	GO:0048471	perinuclear region of cytoplasm	206	0.314011753468714	1.39764809265651	0.0117112418163476	0.41379198385194	0.400828053118464	299	tags=16%, list=10%, signal=16%	MX1/MX1/NME2/UBE2I/FLNA/TGM2/SNF8/DNAJA1/CHI3L1/COPS5/TMEM134/HIF1AN/MAP7/TFRC/INF2/PRDX5/CYB5R4/CDK7/SLC2A4/EIF4E/FMR1/OSBP/MOB2/VPS52/COPS6/PRKAR2B/ARHGAP1/STAT1/CHERP/TRAF6/HSP90AB1/CORO1B/CLIC1/PRKACA
GO:0022613	BP	GO:0022613	ribonucleoprotein complex biogenesis	177	0.316252469529342	1.37930369876396	0.0092643450509879	0.41379198385194	0.400828053118464	1101	tags=44%, list=36%, signal=30%	SF3A3/RPL26/PRPF19/RPS6/AFG2A/DDX18/RPS23/MRM1/XPO1/RPL11/NPM3/RPL13A/RAN/RPS17/FBL/SRSF6/RPL10/RPL10A/PTGES3/HSP90AB1/U2AF2/RPS9/RUVBL2/RPL35/EXOSC4/RIOX2/DDX54/NOP58/SNRPG/DNTTIP2/NOP56/UTP11/TBL3/MTREX/SNRPA1/RPL27/RPS16/PUF60/RSL1D1/RPL23A/RPS11/SBDS/RPS15A/URB1/ADAR/RPS7/DDX3X/SF3A1/EIF3B/SF1/HSP90AA1/SF3B1/LSM6/NOP2/XAB2/DDX21/SNRPD2/SNU13/RPL7/EIF3L/PELP1/RPS8/EIF2S3/RPL38/PA2G4/DDX17/PRPF…
GO:0072521	BP	GO:0072521	purine-containing compound metabolic process	189	0.307725502505048	1.35409997672537	0.011220653580254	0.41379198385194	0.400828053118464	1150	tags=46%, list=37%, signal=30%	NME2/PRPS2/NDUFB11/NDUFS8/RAN/ATP5PO/LDHB/GPI/ACSL1/SULT1A3/NME1/NUDT18/NDUFA9/NUDT4/IMPDH2/AK4/NDUFS2/PRKACA/ATP5F1C/ACSS2/ACSL4/DPYD/NDUFV1/PGK1/ENO1/NDUFB5/NDUFA6/PNP/GART/GMPS/PFKM/NADK2/TKT/ACSS1/ATIC/PPCS/GCDH/HSPA8/ATP1A2/ALDOA/SLC25A1/PGD/NAXD/PRPS1/PRKAA1/AK3/ATP6V1B2/PTGIS/ME2/KDM1A/FOXK1/IDH1/NDUFS1/ATP5F1A/MDH2/ADSL/PKM/ABHD14B/HSD17B4/PFKP/VCP/ENO2/PFKL/ALDOC/TJP2/NNT/MTHFD1/LDHA/SHM…
GO:0055086	BP	GO:0055086	nucleobase-containing small molecule metabolic process	239	0.295997771459531	1.34679088707241	0.00993509352939648	0.41379198385194	0.400828053118464	1140	tags=44%, list=37%, signal=30%	ASMTL/NME2/TYMS/UGGT1/NT5C3A/PRPS2/NDUFB11/NDUFS8/RAN/ATP5PO/LDHB/GPI/ACSL1/SULT1A3/ERH/NME1/NUDT18/NDUFA9/NUDT4/IMPDH2/AK4/DCTPP1/NDUFS2/PRKACA/ATP5F1C/ACSS2/ACSL4/DPYD/PGM3/NDUFV1/PGK1/ENO1/PARK7/NDUFB5/NDUFA6/FCSK/PNP/GART/UGP2/GMPS/PFKM/NADK2/TKT/ACSS1/ATIC/PPCS/GCDH/HSPA8/AMDHD2/ATP1A2/ALDOA/SLC25A1/PGD/NAXD/PRPS1/PRKAA1/DUT/AK3/ATP6V1B2/PTGIS/ME2/KDM1A/ENTPD1/FOXK1/IDH1/NDUFS1/ATP5F1A/KARS1…
GO:0034654	BP	GO:0034654	nucleobase-containing compound biosynthetic process	597	0.260952079138345	1.28569065364655	0.00880983125938759	0.41379198385194	0.400828053118464	839	tags=31%, list=27%, signal=28%	TAF15/DAP/NME2/TYMS/YBX2/IKBKB/CRTC2/UBE2I/FLNA/MAFG/SNF8/PTBP1/TCF4/COPS5/ILF2/HIF1AN/TFRC/SARNP/PCNA/PRDX5/PRPS2/CDK7/S100A9/NPM3/H1-2/NDUFB11/FMR1/WNK1/NDUFS8/BTAF1/ATP5PO/ELOC/NUP62/WFS1/SRSF2/PSMC3/DRAP1/RBBP4/ACSL1/RPL10/NME1/STAT1/PFN1/NDUFA9/TRAF6/PTGES3/HNRNPD/IMPDH2/CD74/AK4/HSP90AB1/STRN3/CRYAB/NDUFS2/ELOB/H1-3/ZFP91/ATP5F1C/ACSS2/ACSL4/CCT2/PGM3/HMGB1/NDUFV1/MNT/ENO1/TEP1/SMARCD2/PARK…
GO:1901362	BP	GO:1901362	organic cyclic compound biosynthetic process	649	0.258906818397385	1.2843161161626	0.00917510486068298	0.41379198385194	0.400828053118464	839	tags=30%, list=27%, signal=28%	TAF15/DAP/NME2/TYMS/YBX2/IKBKB/CRTC2/UBE2I/FLNA/MAFG/SNF8/PTBP1/TCF4/COPS5/ILF2/HIF1AN/FDPS/TFRC/SARNP/PCNA/PRDX5/PRPS2/CDK7/S100A9/NPM3/H1-2/CYB5R1/NDUFB11/FMR1/WNK1/NDUFS8/NPC1L1/BTAF1/OSBP/ATP5PO/ELOC/NUP62/WFS1/SRSF2/PSMC3/HSD17B10/AKR1B1/DRAP1/RBBP4/CYB5R3/ACSL1/RPL10/QDPR/NME1/STAT1/PFN1/NDUFA9/TRAF6/PTGES3/HNRNPD/IMPDH2/CD74/AK4/HSP90AB1/STRN3/CRYAB/NDUFS2/ELOB/H1-3/DHRS11/ZFP91/ATP5F1C/AC…
GO:0019438	BP	GO:0019438	aromatic compound biosynthetic process	617	0.257287769359293	1.27158284446764	0.0120866513011565	0.424423295247692	0.411126289950379	839	tags=30%, list=27%, signal=28%	TAF15/DAP/NME2/TYMS/YBX2/IKBKB/CRTC2/UBE2I/FLNA/MAFG/SNF8/PTBP1/TCF4/COPS5/ILF2/HIF1AN/TFRC/SARNP/PCNA/PRDX5/PRPS2/CDK7/S100A9/NPM3/H1-2/NDUFB11/FMR1/WNK1/NDUFS8/BTAF1/ATP5PO/ELOC/NUP62/WFS1/SRSF2/PSMC3/DRAP1/RBBP4/ACSL1/RPL10/QDPR/NME1/STAT1/PFN1/NDUFA9/TRAF6/PTGES3/HNRNPD/IMPDH2/CD74/AK4/HSP90AB1/STRN3/CRYAB/NDUFS2/ELOB/H1-3/ZFP91/ATP5F1C/ACSS2/ACSL4/CCT2/PGM3/HMGB1/NDUFV1/MNT/ENO1/DHFR/TEP1/SM…
GO:0009201	BP	GO:0009201	ribonucleoside triphosphate biosynthetic process	47	0.441717308206912	1.55369698792974	0.0121963625872326	0.42451900654508	0.411219002652631	381	tags=27%, list=12%, signal=24%	NME2/NDUFB11/NDUFS8/ATP5PO/NME1/NDUFA9/IMPDH2/NDUFS2/ATP5F1C/NDUFV1/ENO1/NDUFB5/NDUFA6
GO:0009259	BP	GO:0009259	ribonucleotide metabolic process	157	0.321830799018317	1.3812963070724	0.0121449352199351	0.42451900654508	0.411219002652631	1150	tags=45%, list=37%, signal=29%	NME2/NDUFB11/NDUFS8/RAN/ATP5PO/GPI/ACSL1/SULT1A3/NME1/NUDT18/NDUFA9/NUDT4/IMPDH2/AK4/NDUFS2/PRKACA/ATP5F1C/ACSS2/ACSL4/DPYD/NDUFV1/PGK1/ENO1/NDUFB5/NDUFA6/PNP/GART/GMPS/PFKM/ACSS1/ATIC/PPCS/GCDH/HSPA8/ATP1A2/ALDOA/SLC25A1/PRKAA1/AK3/ATP6V1B2/FOXK1/NDUFS1/ATP5F1A/CMPK1/ADSL/PKM/ABHD14B/HSD17B4/PFKP/VCP/ENO2/UMPS/PFKL/ALDOC/TJP2/MTHFD1/LDHA/GAPDH/GIT1/DLAT/NDUFS3/ALDOA/UPP1/PDHA1/DLD/NT5C/MTOR/GUCY…
GO:0003725	MF	GO:0003725	double-stranded RNA binding	35	0.465536276874378	1.54267693953467	0.0122573686678371	0.424779378812032	0.411471217564764	1193	tags=60%, list=39%, signal=37%	OAS1/ILF2/TFRC/TUBA1B/HSP90AB1/SLC3A2/OAS2/HSPD1/EIF4A1/ADAR/RIGI/DHX58/DDX21/RFTN1/MTDH/DDX1/HNRNPU/DHX9/DHX15/ZFR/LRRFIP1
GO:0070841	BP	GO:0070841	inclusion body assembly	8	0.714704923377894	1.5924226842996	0.0125690919386908	0.426274844553205	0.412919830986319	883	tags=100%, list=29%, signal=71%	BAG3/HDAC6/PSMC6/DNAJB1/CLU/SORL1/DNAJB6/VCP
GO:1903715	BP	GO:1903715	regulation of aerobic respiration	8	0.714062295452225	1.59099085522872	0.0125690919386908	0.426274844553205	0.412919830986319	420	tags=62%, list=14%, signal=54%	COX7A2L/IDE/AK4/PARK7/COX7A2
GO:0019886	BP	GO:0019886	antigen processing and presentation of exogenous peptide antigen via MHC class II	4	0.821481965783709	1.49512703731856	0.0123852485129919	0.426274844553205	0.412919830986319	257	tags=40%, list=8%, signal=37%	TRAF6/CD74
GO:0070900	BP	GO:0070900	mitochondrial tRNA modification	3	0.901041666666667	1.48734318772825	0.0125372791986064	0.426274844553205	0.412919830986319	307	tags=100%, list=10%, signal=90%	PUS1/HSD17B10/TRMT5
GO:1900864	BP	GO:1900864	mitochondrial RNA modification	3	0.901041666666667	1.48734318772825	0.0125372791986064	0.426274844553205	0.412919830986319	307	tags=100%, list=10%, signal=90%	PUS1/HSD17B10/TRMT5
GO:0031098	BP	GO:0031098	stress-activated protein kinase signaling cascade	16	0.585360891250294	1.61874640328257	0.0127048599049169	0.429045822150725	0.415603995008322	416	tags=31%, list=14%, signal=27%	IKBKB/CCM2/CRYAB/MAPK14/PPIA
GO:0005581	CC	GO:0005581	collagen trimer	30	-0.564259645881231	-1.91955488201773	0.0141831283905097	0.430800515823432	0.417303714858145	536	tags=47%, list=17%, signal=39%	LUM/COL12A1/C1QB/COL5A1/FCN2/EMILIN2/COL6A6/COL6A3/COL5A2/COL1A1/COL1A2/COL4A2/COL3A1/COL28A1/COL2A1
GO:0051213	MF	GO:0051213	dioxygenase activity	19	-0.623361817260086	-1.8986724803365	0.0131649402652385	0.430800515823432	0.417303714858145	226	tags=26%, list=7%, signal=25%	P4HA1/PHF2/P3H1/ADO/ALKBH5
GO:0061041	BP	GO:0061041	regulation of wound healing	42	-0.504223573254179	-1.82183714124375	0.0133212639317739	0.430800515823432	0.417303714858145	429	tags=36%, list=14%, signal=31%	PRKCD/SLC12A2/SERPINF2/APOE/VIL1/ANXA2/EMILIN2/F2/CAV1/PLG/ADRA2A/FGG/FGB/REG3G/FGA
GO:0032964	BP	GO:0032964	collagen biosynthetic process	10	-0.705788390930553	-1.79353511207467	0.0138098881697068	0.430800515823432	0.417303714858145	632	tags=70%, list=21%, signal=56%	EMILIN1/VIM/SERPINF2/COL5A1/F2/RCN3/COL1A1
GO:0044090	BP	GO:0044090	positive regulation of vacuole organization	10	-0.705189511631475	-1.79201325217361	0.0138098881697068	0.430800515823432	0.417303714858145	294	tags=50%, list=10%, signal=45%	SH3GLB1/ANXA2/PIP4K2A/SNX18/RALB
GO:1903313	BP	GO:1903313	positive regulation of mRNA metabolic process	48	-0.476622687022573	-1.76787074258396	0.0138510869290604	0.430800515823432	0.417303714858145	405	tags=17%, list=13%, signal=15%	ROCK2/CDC73/TARDBP/CNOT2/HMX2/RBM3/YBX1/ALKBH5
GO:1903035	BP	GO:1903035	negative regulation of response to wounding	29	-0.52270038602611	-1.75875922874811	0.0143381352581656	0.430800515823432	0.417303714858145	429	tags=48%, list=14%, signal=42%	VTN/CD9/CERS2/TMX1/PRKCD/SLC12A2/SERPINF2/APOE/ANXA2/F2/PLG/FGG/FGB/FGA
GO:2000352	BP	GO:2000352	negative regulation of endothelial cell apoptotic process	5	-0.845183248468633	-1.73966815646307	0.0142715989232828	0.430800515823432	0.417303714858145	73	tags=100%, list=2%, signal=98%	CDH5/FGG/FGB/FGA
GO:1903729	BP	GO:1903729	regulation of plasma membrane organization	9	-0.679444286621125	-1.67176635919615	0.0143221535786252	0.430800515823432	0.417303714858145	573	tags=60%, list=19%, signal=49%	DNM2/SH3GLB1/PRKCD/ANXA2/AHNAK/S100A10
GO:0006506	BP	GO:0006506	GPI anchor biosynthetic process	4	-0.848652339359979	-1.64944010548465	0.0129894987734866	0.430800515823432	0.417303714858145	109	tags=75%, list=4%, signal=72%	DPM1/PIGT/DPM3
GO:1905686	BP	GO:1905686	positive regulation of plasma membrane repair	3	-0.905598958333333	-1.61905908247063	0.013090501081356	0.430800515823432	0.417303714858145	294	tags=100%, list=10%, signal=91%	AHNAK/S100A10
GO:0046688	BP	GO:0046688	response to copper ion	9	0.697652118063708	1.61890598085023	0.0143575624350615	0.430800515823432	0.417303714858145	657	tags=33%, list=21%, signal=26%	TFRC/PARK7/CDK1
GO:1990120	BP	GO:1990120	messenger ribonucleoprotein complex assembly	3	-0.902018229166667	-1.61265733915389	0.0141171929611232	0.430800515823432	0.417303714858145	305	tags=100%, list=10%, signal=90%	CPSF6/CPSF7
GO:0048027	MF	GO:0048027	mRNA 5'-UTR binding	16	0.581085201073433	1.60692248713306	0.0129423270721194	0.430800515823432	0.417303714858145	1100	tags=81%, list=36%, signal=52%	RPL26/FMR1/NCL/RSL1D1/CCT5/RPS7/DDX3X/IGF2BP3/SYNCRIP/SHMT1/RPL5/RPS3A/RPS13
GO:0001510	BP	GO:0001510	RNA methylation	20	0.553375941400645	1.60248632882299	0.0136325296689622	0.430800515823432	0.417303714858145	829	tags=55%, list=27%, signal=40%	ZC3H13/MRM1/FBL/HSD17B10/VIRMA/TRMT5/TRMT1/SNRPG/MEPCE/NOP2/SNRPD2
GO:1904115	CC	GO:1904115	axon cytoplasm	16	0.579444702667637	1.60238588256369	0.0134172617667854	0.430800515823432	0.417303714858145	697	tags=56%, list=23%, signal=44%	BLOC1S3/ACTR10/HSPB1/SPG7/HDAC6/AP3S1/PAFAH1B1/SOD1/MAP1A
GO:1903900	BP	GO:1903900	regulation of viral life cycle	40	0.464028295565869	1.58062837619343	0.0141334841919225	0.430800515823432	0.417303714858145	722	tags=41%, list=23%, signal=32%	MX1/MX1/CSNK2B/OAS1/ISG15/FMR1/FCN1/CD74/HMGB1/SNX3/PPID/PPIA/OAS2/ADAR/DDX3X/TRIM21/PABPC1
GO:1901617	BP	GO:1901617	organic hydroxy compound biosynthetic process	47	0.439457971513908	1.54574999434489	0.0133578873408136	0.430800515823432	0.417303714858145	687	tags=38%, list=22%, signal=30%	FDPS/CYB5R1/NPC1L1/OSBP/HSD17B10/CYB5R3/QDPR/GOT1/DHFR/PARK7/DAO/NFKB1/PNPO/CREB1/IMPA1/CES1/PRKAA1/SOD1
GO:0051087	MF	GO:0051087	protein-folding chaperone binding	51	0.428669686754919	1.54309958917802	0.0140257594648499	0.430800515823432	0.417303714858145	747	tags=49%, list=24%, signal=38%	HSPB6/DNAJA1/TFRC/PFDN6/NUP62/PTGES3/DNAJA2/TBCC/HSCB/BAG6/BAG3/PPID/DNAJB1/CLU/BIN1/HSPA8/ATP1A2/GRPEL1/HSPD1/CDK1/SOD1/TIMM9/DNAJB6/DNAJC8/TBCA
GO:0009145	BP	GO:0009145	purine nucleoside triphosphate biosynthetic process	44	0.444697862656825	1.53790301667126	0.0129334430650942	0.430800515823432	0.417303714858145	381	tags=29%, list=12%, signal=26%	NME2/NDUFB11/NDUFS8/ATP5PO/NME1/NDUFA9/IMPDH2/NDUFS2/ATP5F1C/NDUFV1/ENO1/NDUFB5/NDUFA6
GO:0003735	MF	GO:0003735	structural constituent of ribosome	86	0.381405700295091	1.49965535040661	0.0138610925439351	0.430800515823432	0.417303714858145	1007	tags=47%, list=33%, signal=32%	RPS10/RPL26/RPL21/RPL24/RPS6/MRPL1/RPS23/RPL11/RPL13A/RPS17/RPL9/MRPL19/RPL27A/RPS26/RPL10/RPL10A/RPS9/RPL35/RPL28/RPL27/RPS16/RPL23A/RPS11/RPS15A/RPS7/RPS29/RPL15/MRPL10/RPL18/RPL7/RPL3/MRPL4/RPS8/RPL8/RPL17/RPL12/RPL38/RPL5/RPL22L1/RPLP0
GO:0008156	BP	GO:0008156	negative regulation of DNA replication	4	0.815324403199641	1.48392004959774	0.0136348930692896	0.430800515823432	0.417303714858145	507	tags=75%, list=16%, signal=63%	S100A11/SLFN11/PDS5A
GO:0009152	BP	GO:0009152	purine ribonucleotide biosynthetic process	77	0.382236427471748	1.47938289324307	0.0135481177205476	0.430800515823432	0.417303714858145	613	tags=32%, list=20%, signal=26%	NME2/NDUFB11/NDUFS8/ATP5PO/ACSL1/NME1/NDUFA9/IMPDH2/AK4/NDUFS2/ATP5F1C/ACSS2/ACSL4/NDUFV1/ENO1/NDUFB5/NDUFA6/GART/GMPS/ACSS1/ATIC/PPCS/GCDH/ALDOA/SLC25A1
GO:0006164	BP	GO:0006164	purine nucleotide biosynthetic process	89	0.368405657870792	1.45805682492661	0.0139831279771148	0.430800515823432	0.417303714858145	770	tags=36%, list=25%, signal=28%	NME2/PRPS2/NDUFB11/NDUFS8/ATP5PO/ACSL1/NME1/NDUFA9/IMPDH2/AK4/NDUFS2/ATP5F1C/ACSS2/ACSL4/NDUFV1/ENO1/NDUFB5/NDUFA6/GART/GMPS/NADK2/ACSS1/ATIC/PPCS/GCDH/ALDOA/SLC25A1/NAXD/PRPS1/AK3/PTGIS/NDUFS1/ATP5F1A
GO:0045321	BP	GO:0045321	leukocyte activation	175	-0.307554360954303	-1.40631017292782	0.0143714148369094	0.430800515823432	0.417303714858145	329	tags=14%, list=11%, signal=13%	SART1/MSH2/CHGA/ERBB2/BRD4/MYO18A/BAK1/IKZF1/STOML2/IFI35/CAV1/PRKDC/MS4A1/FKBP1A/MMP14/VAMP8/BPI/AP1G1/SNAP23/FKBP1A/FN1/CASP3/SUPT6H/ALKBH5
GO:0005794	CC	GO:0005794	Golgi apparatus	312	-0.28047375101461	-1.39766043683324	0.0132371644828114	0.430800515823432	0.417303714858145	609	tags=26%, list=20%, signal=23%	AP2A1/ARF5/HS2ST1/CUBN/AP1M2/CLINT1/ARF4/GBA2/SH3GLB1/CIB1/CUX1/VCAN/RAB14/PLIN3/AP1M1/PDCD10/SERPINA1/SEC16A/LUM/M6PR/SEC22B/COG3/GDI1/SDE2/AP3D1/RAB2A/RTN1/WDR44/PITPNB/VAC14/LMAN1/CALU/BICD2/CLCC1/MYO6/FUT8/NSFL1C/PDXDC1/DBNL/GNAQ/APOE/HIP1/TRAPPC8/PACS1/PLOD3/SART1/ARF1/SCAMP2/DPP7/MME/TBC1D5/NUCB1/MYO18A/TMED2/F2/MAPRE1/MAN1A1/AKR7A2/VAPB/KPNA2/CAV1/SLC35A3/QSOX1/RAB43/CLTA/GOLM1/GALT/RSC1A1…
GO:0032446	BP	GO:0032446	protein modification by small protein conjugation	136	0.326113095430449	1.37700214121991	0.0139591422099556	0.430800515823432	0.417303714858145	937	tags=40%, list=30%, signal=29%	PRPF19/UBE2I/DNAJA1/HERC6/COPS5/ISG15/RPL11/WNK1/PDCD6/ELOC/WFS1/AIMP2/COPS6/CUL9/TRAF6/HSP90AB1/U2AF2/ELOB/ZFP91/DERL1/PARK7/DDA1/COPS2/OS9/FBXO6/UBE2V1/PPIA/HERC1/HDAC6/LNPEP/SUMO3/UHRF1/NPEPPS/UBA1/NXN/GPS1/RPS7/DDX3X/DCAF7/UBE4A/TRIM21/HSP90AA1/UFM1/KDM1A/NUB1/VPS18/UBE2D3/TRIM56/VCP/MKRN2/UBE2K/TRIP12/CUL3/USP9X
GO:0042592	BP	GO:0042592	homeostatic process	350	0.278253279819547	1.31746577074226	0.0143853498857371	0.430800515823432	0.417303714858145	704	tags=29%, list=23%, signal=25%	NME2/TPT1/YBX2/CLIC2/CRTC2/FLNA/TGM2/OAS1/SURF4/RPS6/TFRC/MIF/PRDX5/TXNRD1/CYB5R4/SLC2A4/S100A9/ISG15/UBAP2L/EPHX2/DOCK7/WNK1/RPL13A/NPC1L1/RPS17/OSBP/GPX1/TCIRG1/WFS1/GPI/PTPRC/CXCL12/AKR1B1/ACOX1/SLC4A2/ACSL1/ATP6V0D1/SAR1B/STAT1/CSK/IDE/CHERP/TRAF6/CD74/ALDH1A1/RAB7A/GOT1/PRKACA/HMGB1/HSCB/PARK7/ACADL/MAPK14/FLNA/DIAPH1/DOCK10/CORO1A/ACIN1/BAG3/ELANE/WDR37/ATOX1/FABP3/BDH2/LCN2/ATP6V1D/HDAC6/S…
GO:0018130	BP	GO:0018130	heterocycle biosynthetic process	620	0.254019890247672	1.25689461365561	0.0139191887304393	0.430800515823432	0.417303714858145	839	tags=30%, list=27%, signal=28%	TAF15/DAP/NME2/TYMS/YBX2/IKBKB/CRTC2/UBE2I/FLNA/MAFG/SNF8/PTBP1/TCF4/COPS5/ILF2/HIF1AN/TFRC/SARNP/PCNA/PRDX5/PRPS2/CDK7/S100A9/NPM3/H1-2/NDUFB11/FMR1/WNK1/NDUFS8/BTAF1/ATP5PO/ELOC/NUP62/WFS1/SRSF2/PSMC3/AKR1B1/DRAP1/RBBP4/ACSL1/RPL10/QDPR/NME1/STAT1/PFN1/NDUFA9/TRAF6/PTGES3/HNRNPD/IMPDH2/CD74/AK4/HSP90AB1/STRN3/CRYAB/NDUFS2/ELOB/H1-3/ZFP91/ATP5F1C/ACSS2/ACSL4/CCT2/PGM3/HMGB1/NDUFV1/MNT/ENO1/DHFR/…
GO:0003723	MF	GO:0003723	RNA binding	677	0.248878779035469	1.24048808045712	0.0140840021900231	0.430800515823432	0.417303714858145	1104	tags=40%, list=36%, signal=33%	TAF15/SF3A3/RPS10/RPL26/TYMS/TPT1/HNRNPA3/YBX2/SRSF4/RPL21/TES/FNDC3A/UBE2I/RPL24/FLNA/OAS1/RPS6/ZC3H13/PTBP1/DQX1/ILF2/FDPS/TFRC/SARNP/XPOT/IPO5/TUBA1B/CSRP1/DDX18/MRPL1/RPS23/MRM1/EIF4E/XPO1/PUS1/RPL11/NPM3/H1-2/UBAP2L/FMR1/RPL13A/RAN/RPS17/RPL9/SRSF2/RPL27A/FBL/HSD17B10/PSMC1/SRSF6/RPS26/RPL10/ERH/NME1/PFN1/SLC25A11/ETF1/RPL10A/CHERP/NUDT4/HNRNPD/HSPB1/IMPDH2/PRRC2A/VIRMA/LTA4H/HSP90AB1/U2AF2/…
GO:0030195	BP	GO:0030195	negative regulation of blood coagulation	19	-0.602063785600243	-1.83380166939139	0.0151445956659305	0.431065736057928	0.417560625853015	429	tags=47%, list=14%, signal=41%	PRKCD/SERPINF2/APOE/ANXA2/F2/PLG/FGG/FGB/FGA
GO:1900047	BP	GO:1900047	negative regulation of hemostasis	19	-0.602063785600243	-1.83380166939139	0.0151445956659305	0.431065736057928	0.417560625853015	429	tags=47%, list=14%, signal=41%	PRKCD/SERPINF2/APOE/ANXA2/F2/PLG/FGG/FGB/FGA
GO:0008200	MF	GO:0008200	ion channel inhibitor activity	10	-0.697090289528667	-1.7714316736034	0.0155728247331967	0.431065736057928	0.417560625853015	395	tags=70%, list=13%, signal=61%	ITPR1/LAMP1/AMBP/STX7/CAV1/RSC1A1/VAMP8
GO:0016248	MF	GO:0016248	channel inhibitor activity	10	-0.697090289528667	-1.7714316736034	0.0155728247331967	0.431065736057928	0.417560625853015	395	tags=70%, list=13%, signal=61%	ITPR1/LAMP1/AMBP/STX7/CAV1/RSC1A1/VAMP8
GO:0141110	MF	GO:0141110	transporter inhibitor activity	10	-0.697090289528667	-1.7714316736034	0.0155728247331967	0.431065736057928	0.417560625853015	395	tags=70%, list=13%, signal=61%	ITPR1/LAMP1/AMBP/STX7/CAV1/RSC1A1/VAMP8
GO:0015914	BP	GO:0015914	phospholipid transport	16	-0.587419519434216	-1.69146731504726	0.0147071577070828	0.431065736057928	0.417560625853015	447	tags=50%, list=15%, signal=43%	PITPNB/PRKCD/APOE/APOA1/APOA4/SLC4A1/TMEM30B/APOC3
GO:0032757	BP	GO:0032757	positive regulation of interleukin-8 production	18	0.582212105575654	1.64466251589659	0.015057170757314	0.431065736057928	0.417560625853015	439	tags=39%, list=14%, signal=34%	CHI3L1/FCN1/CD74/HMGB1/PARK7/ELANE/MYD88
GO:0000791	CC	GO:0000791	euchromatin	13	0.627704127224047	1.644442888297	0.0151516872770479	0.431065736057928	0.417560625853015	542	tags=54%, list=18%, signal=45%	H1-2/H1-3/RUVBL2/EXOSC4/CREB1/PADI2/UHRF1
GO:0016240	BP	GO:0016240	autophagosome membrane docking	3	-0.899624861455905	-1.60837839901803	0.0149727702375984	0.431065736057928	0.417560625853015	102	tags=100%, list=3%, signal=97%	ATP2A2/VAMP8
GO:0015295	MF	GO:0015295	solute:proton symporter activity	3	-0.899507015239239	-1.60816770974363	0.0149727702375984	0.431065736057928	0.417560625853015	145	tags=67%, list=5%, signal=64%	SLC25A3/SLC25A22
GO:0016878	MF	GO:0016878	acid-thiol ligase activity	10	0.664945436836713	1.60755025428454	0.0150329630872861	0.431065736057928	0.417560625853015	513	tags=55%, list=17%, signal=46%	ACSS3/ACSL1/AACS/ACSS2/ACSL4/ACSS1
GO:0007000	BP	GO:0007000	nucleolus organization	3	-0.897190713951293	-1.60402655144892	0.0153150013026675	0.431065736057928	0.417560625853015	210	tags=67%, list=7%, signal=62%	SMARCA5/PHF2
GO:0006887	BP	GO:0006887	exocytosis	87	-0.388954617164844	-1.59276898127084	0.0154714899474747	0.431065736057928	0.417560625853015	133	tags=15%, list=4%, signal=15%	MIA3/LLGL2/ADRA2A/VAMP8/RAB5A/FGG/S100A10/AP1G1/FGB/SNAP23/PFN2/RALB/FGA
GO:0016877	MF	GO:0016877	ligase activity, forming carbon-sulfur bonds	12	0.621390089320299	1.57570468690962	0.0155891968559256	0.431065736057928	0.417560625853015	601	tags=54%, list=20%, signal=44%	ACSS3/ACSL1/AACS/ACSS2/ACSL4/ACSS1/UBA1
GO:0034061	MF	GO:0034061	DNA polymerase activity	4	0.811463056105435	1.47689225753232	0.0151359421926248	0.431065736057928	0.417560625853015	336	tags=50%, list=11%, signal=45%	PTGES3/TEP1
GO:1902532	BP	GO:1902532	negative regulation of intracellular signal transduction	121	0.352532353298422	1.46226944730987	0.015570521926289	0.431065736057928	0.417560625853015	774	tags=36%, list=25%, signal=28%	TPT1/DNAJA1/STMN1/MIF/SPINK1/PDCD6/NUP62/GPX1/WFS1/PTPRC/CXCL12/ARHGAP25/STAT1/CSK/HSPB1/CD74/SYNJ2BP/PRKACA/PEBP1/ENO1/PARK7/MAPK14/LIMD1/PPP2CB/DAG1/PPIA/CD22/SOD2/VDAC2/AIDA/CLU/ARMC10/PDCD4/CD44/PPP2R1A/PAFAH1B1/DDX3X/PRKAA1/CCAR2/NLRX1/PHB1/HDAC1/KDM1A/TBC1D10C
GO:0005840	CC	GO:0005840	ribosome	119	0.342095063268508	1.41475047682707	0.0153527559635858	0.431065736057928	0.417560625853015	938	tags=39%, list=31%, signal=29%	RPS10/RPL26/RPL21/RPL24/RPS6/MRPL1/RPS23/RPL11/RPL13A/RPS17/RPL9/MRPL19/RPL27A/RPS26/RPL10/ETF1/RPL10A/RPS9/EEF1A1/RPL35/RPL28/GADD45GIP1/RPL27/RPS16/RSL1D1/RPL23A/RPS11/RPS15A/RPS7/RPS29/DDX3X/RPL15/MRPL10/SF1/RPL18/PELO/SNU13/RPL7/RPL3/MRPL4/RPS8/GSPT1/PSMA6/RPL8/RPL17/RPL12/RPL38
GO:0009150	BP	GO:0009150	purine ribonucleotide metabolic process	148	0.320736224461885	1.36788071593477	0.0144678050396243	0.431065736057928	0.417560625853015	1150	tags=45%, list=37%, signal=29%	NME2/NDUFB11/NDUFS8/RAN/ATP5PO/GPI/ACSL1/SULT1A3/NME1/NUDT18/NDUFA9/NUDT4/IMPDH2/AK4/NDUFS2/PRKACA/ATP5F1C/ACSS2/ACSL4/NDUFV1/PGK1/ENO1/NDUFB5/NDUFA6/PNP/GART/GMPS/PFKM/ACSS1/ATIC/PPCS/GCDH/HSPA8/ATP1A2/ALDOA/SLC25A1/PRKAA1/AK3/ATP6V1B2/FOXK1/NDUFS1/ATP5F1A/ADSL/PKM/ABHD14B/HSD17B4/PFKP/VCP/ENO2/PFKL/ALDOC/TJP2/MTHFD1/LDHA/GAPDH/GIT1/DLAT/NDUFS3/ALDOA/PDHA1/DLD/NT5C/MTOR/GUCY1A1/AMPD2/BPNT1/ACSF3
GO:0043066	BP	GO:0043066	negative regulation of apoptotic process	188	0.306871611742634	1.34722658910422	0.0149178452886463	0.431065736057928	0.417560625853015	752	tags=35%, list=24%, signal=29%	NME2/TPT1/HSPB6/FLNA/DNAJA1/COPS5/TFRC/MIF/PRDX5/PTRH2/CFL1/SERPINB9/NUP62/GPX1/WFS1/GPI/SLC25A4/CXCL12/AKR1B1/SRSF6/RPL10/HSPB1/CD74/HSP90AB1/CRYAB/PSME3/MNT/ENO1/PARK7/FLNA/BAG6/MAP2K4/CORO1A/BAG3/PPIA/NFKB1/ASNS/SOD2/API5/NCKAP1L/CREB1/RPS6KB1/VDAC2/HCLS1/GLO1/CLU/ARMC10/ITGA5/MGMT/PDCD4/CD44/HSPD1/ADAR/FABP1/HTT/PAK2/PTK2/CDK1/DDX3X/PRKAA1/CCAR2/SOD1/TXNDC5/UFM1/DNAJB6/HDAC1/KDM1A
GO:1990904	CC	GO:1990904	ribonucleoprotein complex	299	0.287122582608271	1.33841074815115	0.014677339396273	0.431065736057928	0.417560625853015	1020	tags=38%, list=33%, signal=28%	SF3A3/RPS10/RPL26/HNRNPA3/RPL21/PRPF19/RPL24/RPS6/DQX1/ILF2/MRPL1/RPS23/EIF4E/XPO1/RPL11/FMR1/RPL13A/RPS17/NUP62/RPL9/MRPL19/SRSF2/RPL27A/FBL/HSD17B10/RPS26/RPL10/RPL10A/PTGES3/HNRNPD/U2AF2/TEP1/TRA2A/RPS9/RUVBL2/RPL35/LIMD1/RPL28/SNW1/GADD45GIP1/NOP58/SNRPG/SSB/API5/DNTTIP2/NOP56/RBM8A/UTP11/TBL3/RBM17/XPO5/MTREX/NCL/HNRNPC/DDX6/SNRPA1/RPL27/RPS16/PUF60/RSL1D1/HSPA8/RPL23A/RPS11/RPS15A/ADAR/RPS7…
GO:0008092	MF	GO:0008092	cytoskeletal protein binding	300	0.279898249151029	1.30385564207768	0.0155291385754667	0.431065736057928	0.417560625853015	751	tags=30%, list=24%, signal=25%	MX1/MX1/DSTN/VASP/FLNA/STMN1/TPM1/INF2/CSRP1/S100A9/CFL1/FMR1/PDLIM7/NPC1L1/PTPRC/DRG1/PFN1/STK38L/ARPC2/ARPC5L/TAGLN/HSP90AB1/TPM2/CRYAB/CORO1B/DES/RAE1/TBCC/PDCD5/FNTA/COTL1/ABLIM1/TBCB/SYNPO/ARPC1A/FLNA/DIAPH1/CORO1C/NEXN/RAB27A/PPP2CB/GC/CORO1A/MAP1S/CLIP1/DAG1/MYL9/RAB10/PDLIM3/SYNPO2/LMOD1/FABP3/NFKB1/HDAC6/EPS8L3/GOLGA2/FSCN1/MYLK/NCALD/ARPC1B/CLIP2/TMOD3/ACTA1/SSH3/RTCB/HCLS1/CAPZB/WDR1/H…
GO:1901363	MF	GO:1901363	heterocyclic compound binding	628	0.258608199060251	1.28029958277661	0.0149037892893895	0.431065736057928	0.417560625853015	759	tags=29%, list=25%, signal=28%	MX1/PLOD1/MX1/NME2/TYMS/IKBKB/UBE2I/TGM2/OAS1/NT5C3A/DNAJA1/DQX1/ALDH1A3/AFG2A/TXNRD1/TUBA1B/PRPS2/CDK7/DDX18/ACADSB/CYB5R1/ACSS3/WNK1/TAP2/RAN/NPC1L1/BTAF1/LDHB/IRGQ/PSMC3/PRKAR2B/ACOX1/DRG1/CYB5R3/ACSL1/PSMC1/BCS1L/CUL9/ERH/ACADM/SAR1B/QDPR/NME1/PFN1/CSK/TP53RK/PYGM/IDE/AACS/STK38L/RAP1B/IMPDH2/ALDH1A1/MCM2/RAB7A/AK4/DCTPP1/HSP90AB1/COQ6/NDUFS2/DNAJA2/NUBP2/DHRS11/RAB12/GOT1/ATL3/SELENOO/PRKACA…
GO:0032040	CC	GO:0032040	small-subunit processome	34	0.473017003582628	1.55459427962063	0.015962824022629	0.439864484179111	0.426083712855482	643	tags=41%, list=21%, signal=33%	RPS6/RPS23/RPS17/FBL/RPS9/NOP58/DNTTIP2/NOP56/UTP11/TBL3/RPS16/RPS11/RPS15A/RPS7
GO:0090330	BP	GO:0090330	regulation of platelet aggregation	9	-0.674897408879071	-1.66057880872554	0.0160758610944728	0.441446483203239	0.427616148508231	678	tags=67%, list=22%, signal=52%	CD9/EMILIN1/TMX1/PRKCD/EMILIN2/CELA2A
GO:0032786	BP	GO:0032786	positive regulation of DNA-templated transcription, elongation	10	-0.693774016317342	-1.76300442753054	0.0161604708897069	0.442239644761082	0.428384460644389	802	tags=70%, list=26%, signal=52%	CCNK/TCERG1/SUPT5H/CDC73/SUPT16H/BRD4/SUPT6H
GO:1904949	CC	GO:1904949	ATPase complex	50	0.418783457077016	1.49723291965808	0.0162266820722822	0.442525597682583	0.428661454779804	923	tags=45%, list=30%, signal=32%	ATP5PO/TCIRG1/RBBP4/ATP6V0D1/ATP5F1C/SMARCD2/RUVBL2/ATP6V1D/VPS4B/ATP6V1E1/DMAP1/ATP6V1F/SMARCC1/ATP6V1B2/TRRAP/SF3B1/HDAC1/ATP5F1A/ATP6AP1/SMARCB1/DDX21/VCP/CHD3
GO:0001821	BP	GO:0001821	histamine secretion	5	-0.832974453147319	-1.71453839615636	0.0170699150741551	0.447085300424075	0.433078303931057	102	tags=80%, list=3%, signal=77%	VAMP7/BTK/VAMP8/SNAP23
GO:0002349	BP	GO:0002349	histamine production involved in inflammatory response	5	-0.832974453147319	-1.71453839615636	0.0170699150741551	0.447085300424075	0.433078303931057	102	tags=80%, list=3%, signal=77%	VAMP7/BTK/VAMP8/SNAP23
GO:0002441	BP	GO:0002441	histamine secretion involved in inflammatory response	5	-0.832974453147319	-1.71453839615636	0.0170699150741551	0.447085300424075	0.433078303931057	102	tags=80%, list=3%, signal=77%	VAMP7/BTK/VAMP8/SNAP23
GO:0002553	BP	GO:0002553	histamine secretion by mast cell	5	-0.832974453147319	-1.71453839615636	0.0170699150741551	0.447085300424075	0.433078303931057	102	tags=80%, list=3%, signal=77%	VAMP7/BTK/VAMP8/SNAP23
GO:0051608	BP	GO:0051608	histamine transport	5	-0.832974453147319	-1.71453839615636	0.0170699150741551	0.447085300424075	0.433078303931057	102	tags=80%, list=3%, signal=77%	VAMP7/BTK/VAMP8/SNAP23
GO:0043457	BP	GO:0043457	regulation of cellular respiration	10	0.661835375233326	1.60003147147261	0.016716620845959	0.447085300424075	0.433078303931057	420	tags=50%, list=14%, signal=43%	COX7A2L/IDE/AK4/PARK7/COX7A2
GO:0009147	BP	GO:0009147	pyrimidine nucleoside triphosphate metabolic process	12	0.619555760196627	1.57105324323972	0.0167976383944855	0.447085300424075	0.433078303931057	692	tags=50%, list=23%, signal=39%	NME2/TYMS/NME1/DCTPP1/DUT/AK3
GO:0019826	MF	GO:0019826	oxygen sensor activity	3	0.889322916666667	1.46799912892832	0.0164911870199153	0.447085300424075	0.433078303931057	343	tags=100%, list=11%, signal=89%	HIF1AN/NDUFS2/PARK7
GO:0009165	BP	GO:0009165	nucleotide biosynthetic process	108	0.348757849008271	1.42817825292176	0.0169511411281976	0.447085300424075	0.433078303931057	786	tags=35%, list=26%, signal=27%	NME2/TYMS/PRPS2/NDUFB11/NDUFS8/ATP5PO/ACSL1/NME1/NDUFA9/IMPDH2/AK4/NDUFS2/ATP5F1C/ACSS2/ACSL4/NDUFV1/ENO1/NDUFB5/NDUFA6/FCSK/PNP/GART/GMPS/NADK2/ACSS1/ATIC/PPCS/GCDH/ALDOA/SLC25A1/NAXD/PRPS1/DUT/AK3/PTGIS/NDUFS1/ATP5F1A/KARS1/CMPK1
GO:1901293	BP	GO:1901293	nucleoside phosphate biosynthetic process	108	0.348757849008271	1.42817825292176	0.0169511411281976	0.447085300424075	0.433078303931057	786	tags=35%, list=26%, signal=27%	NME2/TYMS/PRPS2/NDUFB11/NDUFS8/ATP5PO/ACSL1/NME1/NDUFA9/IMPDH2/AK4/NDUFS2/ATP5F1C/ACSS2/ACSL4/NDUFV1/ENO1/NDUFB5/NDUFA6/FCSK/PNP/GART/GMPS/NADK2/ACSS1/ATIC/PPCS/GCDH/ALDOA/SLC25A1/NAXD/PRPS1/DUT/AK3/PTGIS/NDUFS1/ATP5F1A/KARS1/CMPK1
GO:0019693	BP	GO:0019693	ribose phosphate metabolic process	165	0.32109268194576	1.38614037765859	0.0167551741787386	0.447085300424075	0.433078303931057	1150	tags=45%, list=37%, signal=30%	NME2/PRPS2/NDUFB11/NDUFS8/RAN/ATP5PO/GPI/ACSL1/SULT1A3/NME1/NUDT18/NDUFA9/NUDT4/IMPDH2/AK4/NDUFS2/PRKACA/ATP5F1C/ACSS2/ACSL4/DPYD/NDUFV1/PGK1/ENO1/NDUFB5/NDUFA6/PNP/GART/GMPS/PFKM/TKT/ACSS1/ATIC/PPCS/PYGL/GCDH/HSPA8/ATP1A2/ALDOA/SLC25A1/PRPS1/PRKAA1/AK3/ATP6V1B2/FOXK1/NDUFS1/ATP5F1A/CMPK1/ADSL/PKM/ABHD14B/HSD17B4/PFKP/VCP/ENO2/UMPS/PFKL/ALDOC/TJP2/MTHFD1/LDHA/GAPDH/GIT1/DLAT/NDUFS3/ALDOA/UPP1/PDH…
GO:0099513	CC	GO:0099513	polymeric cytoskeletal fiber	176	0.311466520807515	1.3571300608231	0.0166349792420188	0.447085300424075	0.433078303931057	839	tags=31%, list=27%, signal=24%	MX1/MX1/NME2/TPT1/FLNA/STMN1/TPM1/MAP7/INF2/TUBA1B/PDLIM7/DYNLL2/TPM2/CORO1B/DES/TBCC/CCT2/COTL1/TBCB/TUBB/FLNA/DIAPH1/CORO1A/MAP1S/CLIP1/PDLIM3/LMOD1/CCT3/HDAC6/GOLGA2/ARHGAP18/ACTG1/RAC2/TCP1/CLIP2/ACTA1/HSPH1/TTLL3/CCT5/PAFAH1B1/RCC2/CALM3/CDK1/SYNM/MAP1A/TWF1/CCT3/TUBG2/TBCA/GFAP/MAPRE2/NEK7/VPS18/TPM4/TWF2/LCP1/CCT8
GO:0030057	CC	GO:0030057	desmosome	11	-0.654374487169612	-1.72338651263995	0.0174856314085574	0.45497039625676	0.440716362991182	495	tags=64%, list=16%, signal=54%	DSC2/DSP/PNN/PKP2/DSG3/DSG2/PKP4
GO:0002688	BP	GO:0002688	regulation of leukocyte chemotaxis	24	0.521710749380559	1.58311479164061	0.0174698501749955	0.45497039625676	0.440716362991182	1086	tags=54%, list=35%, signal=35%	MIF/WNK1/CXCL12/CD74/HMGB1/NCKAP1L/PADI2/RAC2/PTK2/C5/RARRES2/DDT/LGALS9
GO:0001825	BP	GO:0001825	blastocyst formation	9	-0.671262972935743	-1.65163631282948	0.0176347142315178	0.455860234988029	0.441578323445137	320	tags=89%, list=10%, signal=80%	RTN4/CNOT1/ACTL6A/CTR9/YAP1/MATR3/CNOT2/SUPT6H
GO:0016567	BP	GO:0016567	protein ubiquitination	114	0.341367006477939	1.40249426099114	0.0176073053992708	0.455860234988029	0.441578323445137	937	tags=41%, list=30%, signal=30%	PRPF19/DNAJA1/HERC6/ISG15/RPL11/WNK1/PDCD6/ELOC/WFS1/AIMP2/CUL9/TRAF6/HSP90AB1/U2AF2/ELOB/ZFP91/DERL1/PARK7/DDA1/OS9/FBXO6/UBE2V1/PPIA/HERC1/HDAC6/LNPEP/UHRF1/NPEPPS/UBA1/NXN/RPS7/DDX3X/DCAF7/UBE4A/TRIM21/HSP90AA1/KDM1A/NUB1/VPS18/UBE2D3/TRIM56/VCP/MKRN2/UBE2K/TRIP12/CUL3/USP9X
GO:0140896	BP	GO:0140896	cGAS/STING signaling pathway	4	-0.833415282473797	-1.61982537215749	0.017779882727113	0.456638023696986	0.442331744357371	184	tags=50%, list=6%, signal=47%	PRKDC/PCBP2
GO:0160049	BP	GO:0160049	negative regulation of cGAS/STING signaling pathway	4	-0.833415282473797	-1.61982537215749	0.017779882727113	0.456638023696986	0.442331744357371	184	tags=50%, list=6%, signal=47%	PRKDC/PCBP2
GO:0033119	BP	GO:0033119	negative regulation of RNA splicing	15	0.607017557006815	1.6552567844157	0.0184078149843871	0.46972482223825	0.455008538943912	273	tags=33%, list=9%, signal=31%	SRSF4/PTBP1/SRSF6/RPS26/U2AF2
GO:0046348	BP	GO:0046348	amino sugar catabolic process	6	0.754652830109093	1.53915048225822	0.0183620501015604	0.46972482223825	0.455008538943912	606	tags=67%, list=20%, signal=54%	RENBP/CHI3L1/ALDH1A1/AMDHD2
GO:0007338	BP	GO:0007338	single fertilization	28	0.484533003288812	1.51815142074786	0.0184973427903014	0.470496514050743	0.455756053972912	1082	tags=67%, list=35%, signal=44%	SPINK1/UBAP2L/CCT2/PARK7/CCT3/TCP1/VDAC2/ALDOA/CCT5/MFGE8/CDK1/CCT3/CRKL/HEXB/SNU13/CCT8/CCT7/ALDOA/MYH9/AP3B1
GO:0044322	CC	GO:0044322	endoplasmic reticulum quality control compartment	6	0.753188026539688	1.53616294543292	0.0186085168968674	0.471812108925047	0.457030431807038	493	tags=50%, list=16%, signal=42%	DERL1/FBXO6/CANX
GO:0030194	BP	GO:0030194	positive regulation of blood coagulation	10	-0.681519892352221	-1.73186449680685	0.0190987051178954	0.475132676537986	0.460246967417885	727	tags=60%, list=24%, signal=46%	VTN/EMILIN1/SERPINF2/EMILIN2/F2/PLG
GO:0050820	BP	GO:0050820	positive regulation of coagulation	10	-0.681519892352221	-1.73186449680685	0.0190987051178954	0.475132676537986	0.460246967417885	727	tags=60%, list=24%, signal=46%	VTN/EMILIN1/SERPINF2/EMILIN2/F2/PLG
GO:1900048	BP	GO:1900048	positive regulation of hemostasis	10	-0.681519892352221	-1.73186449680685	0.0190987051178954	0.475132676537986	0.460246967417885	727	tags=60%, list=24%, signal=46%	VTN/EMILIN1/SERPINF2/EMILIN2/F2/PLG
GO:0060242	BP	GO:0060242	contact inhibition	3	-0.888883252263733	-1.58917420298523	0.0190879780408976	0.475132676537986	0.460246967417885	320	tags=100%, list=10%, signal=90%	YAP1/CDHR2
GO:0060245	BP	GO:0060245	detection of cell density	3	-0.888883252263733	-1.58917420298523	0.0190879780408976	0.475132676537986	0.460246967417885	320	tags=100%, list=10%, signal=90%	YAP1/CDHR2
GO:0051094	BP	GO:0051094	positive regulation of developmental process	216	0.293029944790816	1.31287546021676	0.0188855390449741	0.475132676537986	0.460246967417885	764	tags=32%, list=25%, signal=26%	NME2/HSPB6/FLNA/PCP4/TGM2/CHI3L1/TCF4/HIF1AN/TFRC/CD101/ISG15/CFL1/FMR1/WNK1/PDCD6/PTPRC/CXCL12/SLC4A2/RBBP4/STAT1/TRAF6/HSPB1/CD74/HSP90AB1/CORO1B/CLIC1/DDAH1/HMGB1/SMARCD2/MAPK14/FLNA/AGRN/CORO1C/ILK/SNW1/ACIN1/DAG1/PNP/DDHD2/NFKB1/HDAC6/SOD2/NCKAP1L/CREB1/RPS6KB1/LAMC1/HCLS1/STAT6/INPP5D/ERAP1/CAMK2B/BIN1/ITGA5/SERPINF1/PAFAH1B1/PTK2/CDK1/PRKAA1/MACROH2A2/SORL1/SMARCC1/NID1/PTGIS/HDAC1/TAPT1/D…
GO:0050886	BP	GO:0050886	endocrine process	9	-0.664133061062181	-1.63409323085947	0.0191935687815166	0.476000505781611	0.461087607932288	819	tags=78%, list=27%, signal=57%	RETN/PTPN11/AGT/COMT/ENPEP/SERPINF2/CTSZ
GO:0048705	BP	GO:0048705	skeletal system morphogenesis	19	-0.569304166786144	-1.73402047492871	0.0193018828319155	0.47719545842393	0.462245123205375	115	tags=47%, list=4%, signal=46%	PRKRA/TMEM119/EIF4A3/MEF2D/COL1A1/MMP14/GLG1/COL3A1/COL2A1
GO:0070199	BP	GO:0070199	establishment of protein localization to chromosome	11	0.638577970940968	1.5804345969523	0.0196344644056974	0.482412103788281	0.467298333240373	1022	tags=83%, list=33%, signal=56%	CCT2/RUVBL2/CCT3/TCP1/CCT5/MACROH2A2/CCT3/CCT8/CCT6A/CCT7
GO:0044042	BP	GO:0044042	glucan metabolic process	21	0.535738823272024	1.57600970131431	0.0196301537878271	0.482412103788281	0.467298333240373	676	tags=50%, list=22%, signal=39%	ACADM/PYGM/PTGES3/PPP1CB/MGAM/PPP1CA/UGP2/PFKM/PYGL/PYGB/AGL
GO:0010751	BP	GO:0010751	negative regulation of nitric oxide mediated signal transduction	3	0.881572877893694	1.45520619403969	0.0199212870483219	0.487948561776181	0.472661336302452	92	tags=33%, list=3%, signal=32%	SPINK1
GO:0097352	BP	GO:0097352	autophagosome maturation	15	-0.580160138990408	-1.63403676098129	0.0205516866848792	0.49336108059752	0.477904283160506	526	tags=40%, list=17%, signal=33%	CHMP6/TOM1/CHMP4C/CHMP1A/VAMP8/CHMP4B
GO:0051084	BP	GO:0051084	'de novo' post-translational protein folding	17	0.568504440151496	1.58666951281757	0.0206396016580616	0.49336108059752	0.477904283160506	680	tags=53%, list=22%, signal=41%	SDF2/UGGT1/PTGES3/CD74/CCT2/DNAJB1/HSPH1/HSPA8/ERO1A
GO:0016556	BP	GO:0016556	mRNA modification	9	0.681830091605847	1.58219087227593	0.0206313300475954	0.49336108059752	0.477904283160506	268	tags=33%, list=9%, signal=31%	ZC3H13/PUS1/VIRMA
GO:0042625	MF	GO:0042625	ATPase-coupled ion transmembrane transporter activity	10	0.653012542847675	1.57870168159911	0.0205649913657704	0.49336108059752	0.477904283160506	704	tags=60%, list=23%, signal=46%	TCIRG1/ATP6V0D1/ATP6V1D/ATP6V1E1/ATP6V1F/ATP6V1B2
GO:0044769	MF	GO:0044769	ATPase activity, coupled to transmembrane movement of ions, rotational mechanism	10	0.653012542847675	1.57870168159911	0.0205649913657704	0.49336108059752	0.477904283160506	704	tags=60%, list=23%, signal=46%	TCIRG1/ATP6V0D1/ATP6V1D/ATP6V1E1/ATP6V1F/ATP6V1B2
GO:0046961	MF	GO:0046961	proton-transporting ATPase activity, rotational mechanism	10	0.653012542847675	1.57870168159911	0.0205649913657704	0.49336108059752	0.477904283160506	704	tags=60%, list=23%, signal=46%	TCIRG1/ATP6V0D1/ATP6V1D/ATP6V1E1/ATP6V1F/ATP6V1B2
GO:0002483	BP	GO:0002483	antigen processing and presentation of endogenous peptide antigen	6	0.74552257942208	1.52052890000559	0.0205802528334029	0.49336108059752	0.477904283160506	576	tags=83%, list=19%, signal=68%	TAP2/TAPBP/IDE/TAP1/ERAP1
GO:0019885	BP	GO:0019885	antigen processing and presentation of endogenous peptide antigen via MHC class I	6	0.74552257942208	1.52052890000559	0.0205802528334029	0.49336108059752	0.477904283160506	576	tags=83%, list=19%, signal=68%	TAP2/TAPBP/IDE/TAP1/ERAP1
GO:0005976	BP	GO:0005976	polysaccharide metabolic process	26	0.493226033239361	1.51861607436113	0.0207527296503632	0.494575563078925	0.479080716410945	676	tags=44%, list=22%, signal=35%	ACADM/PYGM/PTGES3/PPP1CB/MGAM/PPP1CA/UGP2/NFKB1/PFKM/PYGL/PYGB/AGL
GO:0006476	BP	GO:0006476	protein deacetylation	8	0.690568178409047	1.53864398632746	0.0208669243548274	0.495808118802126	0.48027465667603	742	tags=78%, list=24%, signal=59%	FLNA/FNTA/FLNA/HDAC6/PRKAA1/CCAR2/HDAC1
GO:0048704	BP	GO:0048704	embryonic skeletal system morphogenesis	6	-0.756370533771833	-1.67229996619578	0.0213996833242401	0.503940317095457	0.488152076579495	106	tags=50%, list=3%, signal=48%	EIF4A3/MMP14/COL2A1
GO:0005847	CC	GO:0005847	mRNA cleavage and polyadenylation specificity factor complex	8	-0.688406344771411	-1.63361115457494	0.021345168246248	0.503940317095457	0.488152076579495	305	tags=62%, list=10%, signal=56%	CSTF2/NUDT21/SYMPK/CPSF6/CPSF7
GO:0060390	BP	GO:0060390	regulation of SMAD protein signal transduction	7	0.727224364933927	1.57046682486645	0.0213196544309796	0.503940317095457	0.488152076579495	16	tags=14%, list=1%, signal=14%	CSNK2B
GO:0033176	CC	GO:0033176	proton-transporting V-type ATPase complex	10	0.649884295737696	1.57113893410357	0.0215270855030332	0.504148146427262	0.488353394704783	779	tags=70%, list=25%, signal=52%	TCIRG1/ATP6V0D1/ATP6V1D/ATP6V1E1/ATP6V1F/ATP6V1B2/ATP6AP1
GO:0010882	BP	GO:0010882	regulation of cardiac muscle contraction by calcium ion signaling	8	0.686888338254793	1.53044499294634	0.0215990889346357	0.504148146427262	0.488353394704783	656	tags=50%, list=21%, signal=39%	CLIC2/PRKACA/ATP1A2/CALM3
GO:0000166	MF	GO:0000166	nucleotide binding	595	0.254006030765235	1.25083537710547	0.0215873352104128	0.504148146427262	0.488353394704783	759	tags=29%, list=25%, signal=27%	MX1/MX1/NME2/IKBKB/UBE2I/TGM2/OAS1/NT5C3A/DNAJA1/DQX1/ALDH1A3/AFG2A/TXNRD1/TUBA1B/PRPS2/CDK7/DDX18/ACADSB/CYB5R1/ACSS3/WNK1/TAP2/RAN/BTAF1/LDHB/IRGQ/PSMC3/PRKAR2B/ACOX1/DRG1/CYB5R3/ACSL1/PSMC1/BCS1L/CUL9/ERH/ACADM/SAR1B/QDPR/NME1/PFN1/CSK/TP53RK/PYGM/IDE/AACS/STK38L/RAP1B/IMPDH2/ALDH1A1/MCM2/RAB7A/AK4/DCTPP1/HSP90AB1/COQ6/NDUFS2/DNAJA2/NUBP2/DHRS11/RAB12/ATL3/SELENOO/PRKACA/ACSS2/ACSL4/CCT2/DPYD/…
GO:0005849	CC	GO:0005849	mRNA cleavage factor complex	10	-0.667879021474809	-1.69720059301883	0.0218507117047118	0.508525654218747	0.492593756998025	305	tags=40%, list=10%, signal=36%	NUDT21/SYMPK/CPSF6/CPSF7
GO:1901265	MF	GO:1901265	nucleoside phosphate binding	596	0.253171347700601	1.24709872617745	0.0219415221016836	0.509145963154857	0.49319463191319	759	tags=29%, list=25%, signal=27%	MX1/MX1/NME2/IKBKB/UBE2I/TGM2/OAS1/NT5C3A/DNAJA1/DQX1/ALDH1A3/AFG2A/TXNRD1/TUBA1B/PRPS2/CDK7/DDX18/ACADSB/CYB5R1/ACSS3/WNK1/TAP2/RAN/BTAF1/LDHB/IRGQ/PSMC3/PRKAR2B/ACOX1/DRG1/CYB5R3/ACSL1/PSMC1/BCS1L/CUL9/ERH/ACADM/SAR1B/QDPR/NME1/PFN1/CSK/TP53RK/PYGM/IDE/AACS/STK38L/RAP1B/IMPDH2/ALDH1A1/MCM2/RAB7A/AK4/DCTPP1/HSP90AB1/COQ6/NDUFS2/DNAJA2/NUBP2/DHRS11/RAB12/ATL3/SELENOO/PRKACA/ACSS2/ACSL4/CCT2/DPYD/…
GO:0061045	BP	GO:0061045	negative regulation of wound healing	24	-0.583960374607158	-1.88107762882907	0.0228111825488749	0.514332287482545	0.498218470856991	429	tags=42%, list=14%, signal=36%	PRKCD/SLC12A2/SERPINF2/APOE/ANXA2/F2/PLG/FGG/FGB/FGA
GO:0006406	BP	GO:0006406	mRNA export from nucleus	32	-0.520360908577534	-1.78014786330612	0.0236113824387565	0.514332287482545	0.498218470856991	83	tags=9%, list=3%, signal=9%	NUP107/SUPT6H/ALKBH5
GO:0001706	BP	GO:0001706	endoderm formation	21	-0.562286087680631	-1.73845633306181	0.0240292721996759	0.514332287482545	0.498218470856991	401	tags=43%, list=13%, signal=38%	COL12A1/CDC73/ITGA4/COL5A1/MMP9/COL5A2/MMP14/COL4A2/FN1
GO:0035987	BP	GO:0035987	endodermal cell differentiation	21	-0.562286087680631	-1.73845633306181	0.0240292721996759	0.514332287482545	0.498218470856991	401	tags=43%, list=13%, signal=38%	COL12A1/CDC73/ITGA4/COL5A1/MMP9/COL5A2/MMP14/COL4A2/FN1
GO:0009451	BP	GO:0009451	RNA modification	37	-0.472385691814272	-1.66963011686756	0.0247234012640501	0.514332287482545	0.498218470856991	2	tags=5%, list=0%, signal=5%	RBM47/ALKBH5
GO:0070567	MF	GO:0070567	cytidylyltransferase activity	5	-0.810473733220022	-1.66822443285203	0.0241847439945312	0.514332287482545	0.498218470856991	298	tags=80%, list=10%, signal=72%	NANS/PCYT1A/PCYT2/CDS2
GO:0032371	BP	GO:0032371	regulation of sterol transport	11	-0.63006236390149	-1.6593571438986	0.0249346664638033	0.514332287482545	0.498218470856991	377	tags=64%, list=12%, signal=56%	APOE/APOA1/APOA4/ANXA2/SEC24A/CAV1/APOC3
GO:0032374	BP	GO:0032374	regulation of cholesterol transport	11	-0.63006236390149	-1.6593571438986	0.0249346664638033	0.514332287482545	0.498218470856991	377	tags=64%, list=12%, signal=56%	APOE/APOA1/APOA4/ANXA2/SEC24A/CAV1/APOC3
GO:1900120	BP	GO:1900120	regulation of receptor binding	6	-0.750272274645072	-1.65881699974457	0.0244296527944758	0.514332287482545	0.498218470856991	321	tags=83%, list=10%, signal=75%	PTPRF/ATP2A2/ADIPOQ/MMP9/ANXA2
GO:0008585	BP	GO:0008585	female gonad development	12	-0.611138769683716	-1.6530335926477	0.022851394379827	0.514332287482545	0.498218470856991	106	tags=25%, list=3%, signal=24%	MMP14/NUP107/CASP3
GO:0046545	BP	GO:0046545	development of primary female sexual characteristics	12	-0.611138769683716	-1.6530335926477	0.022851394379827	0.514332287482545	0.498218470856991	106	tags=25%, list=3%, signal=24%	MMP14/NUP107/CASP3
GO:0006957	BP	GO:0006957	complement activation, alternative pathway	7	-0.713343980003405	-1.64427382076974	0.0236721595956759	0.514332287482545	0.498218470856991	195	tags=86%, list=6%, signal=80%	CFB/C8G/C3/CFH/C9/CFD
GO:1902749	BP	GO:1902749	regulation of cell cycle G2/M phase transition	16	-0.567296308248105	-1.63352277478431	0.0247335973358644	0.514332287482545	0.498218470856991	407	tags=41%, list=13%, signal=36%	RRM2B/BABAM1/BRD4/SIN3A/CHMP4C/USP47/CDK4
GO:0051403	BP	GO:0051403	stress-activated MAPK cascade	15	0.597933594364786	1.63048601688347	0.0223941716687955	0.514332287482545	0.498218470856991	416	tags=33%, list=14%, signal=29%	IKBKB/CCM2/CRYAB/MAPK14/PPIA
GO:0014910	BP	GO:0014910	regulation of smooth muscle cell migration	15	0.593392804431912	1.61810388187561	0.0242724169729593	0.514332287482545	0.498218470856991	285	tags=25%, list=9%, signal=23%	S100A11/TPM1/DOCK7/CORO1B
GO:1901099	BP	GO:1901099	negative regulation of signal transduction in absence of ligand	4	-0.822576439209355	-1.59875900381293	0.0235151186205669	0.514332287482545	0.498218470856991	11	tags=50%, list=0%, signal=50%	CTNNA1/COL2A1
GO:2001240	BP	GO:2001240	negative regulation of extrinsic apoptotic signaling pathway in absence of ligand	4	-0.822576439209355	-1.59875900381293	0.0235151186205669	0.514332287482545	0.498218470856991	11	tags=50%, list=0%, signal=50%	CTNNA1/COL2A1
GO:0001765	BP	GO:0001765	membrane raft assembly	9	-0.649579705078468	-1.59828483357649	0.024477756649979	0.514332287482545	0.498218470856991	356	tags=44%, list=12%, signal=39%	FLOT1/ANXA2/CAV1/S100A10
GO:1905550	BP	GO:1905550	regulation of protein localization to endoplasmic reticulum	3	-0.882105233266355	-1.57705624158755	0.0228710870191401	0.514332287482545	0.498218470856991	16	tags=67%, list=1%, signal=66%	RTN4/DDRGK1
GO:0035612	MF	GO:0035612	AP-2 adaptor complex binding	3	-0.881184895833333	-1.57541083258375	0.0232150067072592	0.514332287482545	0.498218470856991	369	tags=100%, list=12%, signal=88%	BMP2K/TBC1D5
GO:0031838	CC	GO:0031838	haptoglobin-hemoglobin complex	3	-0.880173639834608	-1.57360287643012	0.0232150067072592	0.514332287482545	0.498218470856991	139	tags=75%, list=5%, signal=72%	HBB/HBB/HP
GO:0032489	BP	GO:0032489	regulation of Cdc42 protein signal transduction	3	-0.878580729166667	-1.57075501926248	0.0239028463590494	0.514332287482545	0.498218470856991	377	tags=100%, list=12%, signal=88%	APOA1/APOC3
GO:0060228	MF	GO:0060228	phosphatidylcholine-sterol O-acyltransferase activator activity	3	-0.878580729166667	-1.57075501926248	0.0239028463590494	0.514332287482545	0.498218470856991	377	tags=100%, list=12%, signal=88%	APOA1/APOA4
GO:0005588	CC	GO:0005588	collagen type V trimer	3	-0.876302083333333	-1.56668118260638	0.0242467663149044	0.514332287482545	0.498218470856991	384	tags=100%, list=12%, signal=88%	COL5A2/COL28A1
GO:0002690	BP	GO:0002690	positive regulation of leukocyte chemotaxis	19	0.547678575108899	1.56508904696027	0.0233014266639442	0.514332287482545	0.498218470856991	653	tags=37%, list=21%, signal=29%	WNK1/CXCL12/CD74/HMGB1/NCKAP1L/RAC2/PTK2
GO:1902253	BP	GO:1902253	regulation of intrinsic apoptotic signaling pathway by p53 class mediator	11	0.631194965752548	1.56216218957178	0.0239708610505444	0.514332287482545	0.498218470856991	752	tags=73%, list=24%, signal=55%	RPL26/MIF/CD74/ARMC10/CD44/RPS7/EIF5A/KDM1A
GO:1903901	BP	GO:1903901	negative regulation of viral life cycle	7	0.720961376808752	1.55694167974014	0.0227984584560738	0.514332287482545	0.498218470856991	416	tags=57%, list=14%, signal=50%	CSNK2B/FCN1/SNX3/PPIA
GO:1901796	BP	GO:1901796	regulation of signal transduction by p53 class mediator	25	0.508174324622121	1.55054601301783	0.0230437489599195	0.514332287482545	0.498218470856991	1131	tags=64%, list=37%, signal=41%	RPL26/MIF/RPL11/TP53RK/CD74/ARMC10/CD44/RPS7/EIF5A/KDM1A/NOP2/DDX5/RPL5/USP15/MTOR/USP7
GO:0042102	BP	GO:0042102	positive regulation of T cell proliferation	19	0.541675613472899	1.54793451520968	0.0247377029213228	0.514332287482545	0.498218470856991	466	tags=37%, list=15%, signal=31%	TFRC/PTPRC/TRAF6/HMGB1/CORO1A/PNP/NCKAP1L
GO:0090665	CC	GO:0090665	glycoprotein complex	7	0.716050909086086	1.54633735042326	0.0245237309924021	0.514332287482545	0.498218470856991	603	tags=62%, list=20%, signal=50%	FLNA/PGM5/FLNA/DAG1/SNTA1
GO:0045665	BP	GO:0045665	negative regulation of neuron differentiation	7	0.711750366293756	1.53705017563933	0.0250166662006379	0.514332287482545	0.498218470856991	563	tags=43%, list=18%, signal=35%	PTBP1/EIF4E/DDX6
GO:0046633	BP	GO:0046633	alpha-beta T cell proliferation	7	0.710904184291237	1.53522281557435	0.0250166662006379	0.514332287482545	0.498218470856991	196	tags=29%, list=6%, signal=27%	PTPRC/SLC4A2
GO:1902229	BP	GO:1902229	regulation of intrinsic apoptotic signaling pathway in response to DNA damage	12	0.603560091192386	1.5304918454102	0.0233232428129619	0.514332287482545	0.498218470856991	752	tags=75%, list=24%, signal=57%	RPL26/TPT1/MIF/CXCL12/CD74/CLU/CD44/CCAR2/KDM1A
GO:1901983	BP	GO:1901983	regulation of protein acetylation	6	0.737110755192353	1.50337258281801	0.0242772634192517	0.514332287482545	0.498218470856991	672	tags=67%, list=22%, signal=52%	PARK7/HDAC6/DDX3X/PRKAA1
GO:1902165	BP	GO:1902165	regulation of intrinsic apoptotic signaling pathway in response to DNA damage by p53 class mediator	6	0.735054595404687	1.49917894674786	0.0250166662006379	0.514332287482545	0.498218470856991	752	tags=83%, list=24%, signal=63%	RPL26/MIF/CD74/CD44/KDM1A
GO:0009123	BP	GO:0009123	nucleoside monophosphate metabolic process	36	0.449682027965795	1.49715227952396	0.0236785963742325	0.514332287482545	0.498218470856991	1139	tags=56%, list=37%, signal=35%	TYMS/PRPS2/IMPDH2/AK4/DPYD/PNP/GART/GMPS/ATIC/PRPS1/DUT/AK3/CMPK1/ADSL/UMPS/TJP2/SHMT1/UPP1/NT5C/AMPD2
GO:0099560	BP	GO:0099560	synaptic membrane adhesion	3	0.875209560109365	1.44470230980436	0.0225598317980761	0.514332287482545	0.498218470856991	352	tags=67%, list=11%, signal=59%	SPARCL1/MAPK14
GO:0052650	MF	GO:0052650	NADP-retinol dehydrogenase activity	3	0.874137721343674	1.44293303303785	0.0225598317980761	0.514332287482545	0.498218470856991	193	tags=67%, list=6%, signal=63%	RDH11/AKR1B1
GO:0010463	BP	GO:0010463	mesenchymal cell proliferation	3	0.871642936822197	1.43881490964784	0.0241429604345626	0.514332287482545	0.498218470856991	228	tags=33%, list=7%, signal=31%	STAT1
GO:0010464	BP	GO:0010464	regulation of mesenchymal cell proliferation	3	0.871642936822197	1.43881490964784	0.0241429604345626	0.514332287482545	0.498218470856991	228	tags=33%, list=7%, signal=31%	STAT1
GO:0000153	CC	GO:0000153	cytoplasmic ubiquitin ligase complex	3	0.871419270833333	1.43844570576175	0.0241429604345626	0.514332287482545	0.498218470856991	398	tags=100%, list=13%, signal=87%	ELOB/DERL1/OS9
GO:0006163	BP	GO:0006163	purine nucleotide metabolic process	184	0.305022315955906	1.33401433419835	0.022313835776294	0.514332287482545	0.498218470856991	1150	tags=45%, list=37%, signal=30%	NME2/PRPS2/NDUFB11/NDUFS8/RAN/ATP5PO/LDHB/GPI/ACSL1/SULT1A3/NME1/NUDT18/NDUFA9/NUDT4/IMPDH2/AK4/NDUFS2/PRKACA/ATP5F1C/ACSS2/ACSL4/NDUFV1/PGK1/ENO1/NDUFB5/NDUFA6/PNP/GART/GMPS/PFKM/NADK2/TKT/ACSS1/ATIC/PPCS/GCDH/HSPA8/ATP1A2/ALDOA/SLC25A1/PGD/NAXD/PRPS1/PRKAA1/AK3/ATP6V1B2/PTGIS/ME2/FOXK1/IDH1/NDUFS1/ATP5F1A/MDH2/ADSL/PKM/ABHD14B/HSD17B4/PFKP/VCP/ENO2/PFKL/ALDOC/TJP2/NNT/MTHFD1/LDHA/GAPDH/GIT1/DLA…
GO:0009628	BP	GO:0009628	response to abiotic stimulus	222	0.29187294308097	1.31196875511942	0.0243863461440433	0.514332287482545	0.498218470856991	734	tags=36%, list=24%, signal=30%	PLOD1/RPL26/HSPB6/DNAJA1/CLCA1/CHI3L1/MFAP4/MAP7/TFRC/PCNA/CYB5R4/SLC2A4/RIC8A/WNK1/PDCD6/GPX1/GPI/PTPRC/CXCL12/RDH11/AKR1B1/ATP6V0D1/ACADM/STAT1/PPP1CB/HNRNPD/HSPB1/AK4/HSP90AB1/CRYAB/NDUFS2/DNAJA2/PRKACA/DDAH1/EIF2B3/PGK1/ENO1/GRB2/BRCC3/MAPK14/RUVBL2/LIMD1/PPP1CA/MAP2K4/BAG3/DAG1/IKBIP/ELANE/PPID/DDHD2/MYD88/NFKB1/H2AX/HDAC6/SOD2/TFAM/RPS6KB1/MYLK/CAB39/GPLD1/ACTA1/DNAJB1/NPEPPS/EIF2B5/ATP1A2/…
GO:0033036	BP	GO:0033036	macromolecule localization	739	-0.219029449650702	-1.17087703465613	0.0240455278922479	0.514332287482545	0.498218470856991	624	tags=24%, list=20%, signal=25%	ROCK1/SRSF3/MTX1/EPB41L2/AGT/TOM1L2/PDZK1/AP2A1/COMT/ARF5/C3/HEXA/SLBP/CUBN/AP1M2/ARF4/FUBP3/EIF4A3/SH3GLB1/CIB1/PCK2/RAB14/EXOC5/PLIN3/AP1M1/PDCD10/RBM22/SEC16A/M6PR/SEC22B/SORBS1/CHMP6/ESYT2/APOBR/IPO4/COG3/GDI1/ABCD3/DDX19B/RHOB/STARD10/APOB/HTATSF1/SNX2/AP3D1/FABP5/FBN1/RAB5C/RAB2A/RANGAP1/ATP13A1/FABP2/CDH5/VTA1/EXOC2/PITPNB/MISP/CD2AP/MICALL2/USH1C/LMAN1/PLIN5/DDX39B/AFDN/PRKCD/RRBP1/BICD2/…
GO:0019405	BP	GO:0019405	alditol catabolic process	5	-0.806195185933342	-1.65941775988017	0.0253095937785909	0.514996146762408	0.498861531701754	142	tags=60%, list=5%, signal=57%	GPD2/GK/SORD
GO:2000047	BP	GO:2000047	regulation of cell-cell adhesion mediated by cadherin	6	-0.748156839619971	-1.65413987158712	0.0251871464641163	0.514996146762408	0.498861531701754	430	tags=83%, list=14%, signal=72%	AFDN/SERPINF2/FLOT1/TJP1/PLG
GO:0007339	BP	GO:0007339	binding of sperm to zona pellucida	11	0.625666879033951	1.54848057213022	0.0254210754543698	0.514996146762408	0.498861531701754	1054	tags=85%, list=34%, signal=56%	UBAP2L/CCT2/CCT3/TCP1/VDAC2/ALDOA/CCT5/CCT3/CCT8/CCT7/ALDOA
GO:0043596	CC	GO:0043596	nuclear replication fork	11	0.624818743539356	1.5463814977187	0.0254210754543698	0.514996146762408	0.498861531701754	478	tags=27%, list=16%, signal=23%	PRPF19/PCNA/POLD2
GO:0048025	BP	GO:0048025	negative regulation of mRNA splicing, via spliceosome	12	0.598494066429514	1.51764555271894	0.0255032114009106	0.514996146762408	0.498861531701754	273	tags=33%, list=9%, signal=30%	SRSF4/PTBP1/SRSF6/U2AF2
GO:0050686	BP	GO:0050686	negative regulation of mRNA processing	12	0.598494066429514	1.51764555271894	0.0255032114009106	0.514996146762408	0.498861531701754	273	tags=33%, list=9%, signal=30%	SRSF4/PTBP1/SRSF6/U2AF2
GO:0019221	BP	GO:0019221	cytokine-mediated signaling pathway	83	0.354868919205637	1.3873618162818	0.0252509399444903	0.514996146762408	0.498861531701754	642	tags=30%, list=21%, signal=24%	MX1/MX1/CSNK2B/IKBKB/OAS1/ISG15/WNK1/PTPRC/CXCL12/ACSL1/STAT1/TRAF6/CD74/PRKACA/PPP2CB/ILK/STAT5A/MYD88/PADI2/HCLS1/STAT6/OAS2/CD44/ADAR/PAFAH1B1
GO:0072599	BP	GO:0072599	establishment of protein localization to endoplasmic reticulum	14	-0.575895172300306	-1.63370801436243	0.0256067598994853	0.515391253959186	0.499244260354406	217	tags=36%, list=7%, signal=33%	MAN1A1/SRPRB/SPCS3/SEC61A1/CHMP4B
GO:0034114	BP	GO:0034114	regulation of heterotypic cell-cell adhesion	9	-0.646438765123203	-1.59055657997739	0.0256526644800754	0.515391253959186	0.499244260354406	356	tags=56%, list=12%, signal=49%	FLOT1/APOA1/FGG/FGB/FGA
GO:0004252	MF	GO:0004252	serine-type endopeptidase activity	29	-0.479887764970839	-1.61470520774325	0.0259565790237952	0.520180331143532	0.503883297742627	421	tags=28%, list=14%, signal=24%	C2/MMP9/F2/PLG/MMP14/HP/CELA2A/CFD
GO:0010389	BP	GO:0010389	regulation of G2/M transition of mitotic cell cycle	15	-0.573058371699953	-1.614034440862	0.02609919758986	0.521720987589746	0.505375686063231	407	tags=44%, list=13%, signal=38%	RRM2B/BABAM1/BRD4/SIN3A/CHMP4C/USP47/CDK4
GO:0046174	BP	GO:0046174	polyol catabolic process	6	-0.74409532676331	-1.6451600561268	0.0263233877624975	0.524880415284372	0.508436130202378	142	tags=50%, list=5%, signal=48%	GPD2/GK/SORD
GO:0042158	BP	GO:0042158	lipoprotein biosynthetic process	11	-0.62406229116575	-1.64355511519732	0.0265053226185243	0.527183559650649	0.510667118013674	532	tags=55%, list=17%, signal=45%	PPM1B/APOB/APOE/APOA1/PIGT/DPM3
GO:1903034	BP	GO:1903034	regulation of response to wounding	51	-0.425760505982031	-1.58326191650944	0.0265921913553224	0.527589076489597	0.511059930178736	429	tags=29%, list=14%, signal=25%	PRKCD/SLC12A2/SERPINF2/APOE/VIL1/ANXA2/EMILIN2/F2/CAV1/PLG/ADRA2A/FGG/FGB/REG3G/FGA
GO:0016405	MF	GO:0016405	CoA-ligase activity	9	0.668750455929311	1.55183949818012	0.0269170102322505	0.532701728686134	0.516012405108611	513	tags=60%, list=17%, signal=50%	ACSS3/ACSL1/AACS/ACSS2/ACSL4/ACSS1
GO:0030193	BP	GO:0030193	regulation of blood coagulation	25	-0.600464792603849	-1.96577970976776	0.0289890204969121	0.535863433683826	0.519075055203865	429	tags=60%, list=14%, signal=52%	VTN/CD9/EMILIN1/TMX1/PRKCD/SERPINF2/APOE/ANXA2/EMILIN2/F2/CAV1/PLG/FGG/FGB/FGA
GO:1900046	BP	GO:1900046	regulation of hemostasis	25	-0.600464792603849	-1.96577970976776	0.0289890204969121	0.535863433683826	0.519075055203865	429	tags=60%, list=14%, signal=52%	VTN/CD9/EMILIN1/TMX1/PRKCD/SERPINF2/APOE/ANXA2/EMILIN2/F2/CAV1/PLG/FGG/FGB/FGA
GO:0044091	BP	GO:0044091	membrane biogenesis	22	-0.539055245196259	-1.68964543626627	0.0285269150216321	0.535863433683826	0.519075055203865	402	tags=41%, list=13%, signal=36%	NSFL1C/FLOT1/ANXA2/CAV1/CHMP4C/CHMP1A/S100A10/CHMP4B/PEX16
GO:0002931	BP	GO:0002931	response to ischemia	10	-0.6565841975936	-1.66849841616815	0.027756166702588	0.535863433683826	0.519075055203865	804	tags=70%, list=26%, signal=52%	RELA/ITGAM/CIB1/EEF2K/ROCK2/AIFM1/CAV1
GO:0034110	BP	GO:0034110	regulation of homotypic cell-cell adhesion	10	-0.654167967380422	-1.66235834106649	0.0293309589780188	0.535863433683826	0.519075055203865	678	tags=60%, list=22%, signal=47%	CD9/EMILIN1/TMX1/PRKCD/EMILIN2/CELA2A
GO:0001990	BP	GO:0001990	regulation of systemic arterial blood pressure by hormone	5	-0.801628664495114	-1.6500183403504	0.027559295982574	0.535863433683826	0.519075055203865	615	tags=100%, list=20%, signal=80%	COMT/ENPEP/SERPINF2/CTSZ
GO:0003081	BP	GO:0003081	regulation of systemic arterial blood pressure by renin-angiotensin	5	-0.801628664495114	-1.6500183403504	0.027559295982574	0.535863433683826	0.519075055203865	615	tags=100%, list=20%, signal=80%	COMT/ENPEP/SERPINF2/CTSZ
GO:0034116	BP	GO:0034116	positive regulation of heterotypic cell-cell adhesion	5	-0.798651369027834	-1.64389007630092	0.0294340500251603	0.535863433683826	0.519075055203865	73	tags=80%, list=2%, signal=78%	FLOT1/FGG/FGB/FGA
GO:1904026	BP	GO:1904026	regulation of collagen fibril organization	6	-0.738179600430598	-1.63208066116824	0.0285958728010089	0.535863433683826	0.519075055203865	632	tags=57%, list=21%, signal=46%	EMILIN1/AEBP1/TNXB/EFEMP2
GO:0010755	BP	GO:0010755	regulation of plasminogen activation	7	-0.703227845814415	-1.62095590531713	0.029353368434651	0.535863433683826	0.519075055203865	410	tags=71%, list=13%, signal=62%	SERPINF2/CTSZ/ANXA2/CLEC3B/S100A10
GO:0090151	BP	GO:0090151	establishment of protein localization to mitochondrial membrane	15	0.58511015591347	1.59551819222821	0.0275714829991653	0.535863433683826	0.519075055203865	1095	tags=80%, list=36%, signal=52%	TOMM40/BCS1L/PDCD5/TIMM8B/TOMM7/TIMM9/TIMM8A/SAMM50/HSP90AA1/TOMM70/AP3B1/HSPA4
GO:0000470	BP	GO:0000470	maturation of LSU-rRNA	14	0.593000296218472	1.58492386406646	0.0274008231634338	0.535863433683826	0.519075055203865	851	tags=57%, list=28%, signal=42%	DDX18/RPL10A/RPL35/RSL1D1/URB1/NOP2/SNU13/RPL7
GO:0031528	CC	GO:0031528	microvillus membrane	9	-0.643119018594673	-1.58238837446483	0.027219209859127	0.535863433683826	0.519075055203865	610	tags=44%, list=20%, signal=36%	PDZK1/CUBN/CDHR2/NHERF1
GO:0052742	MF	GO:0052742	phosphatidylinositol kinase activity	4	-0.809653289073436	-1.57364157806063	0.0294400777578312	0.535863433683826	0.519075055203865	235	tags=75%, list=8%, signal=69%	PIK3R1/PI4KA/PIP4K2A
GO:0010954	BP	GO:0010954	positive regulation of protein processing	9	-0.637832612262791	-1.56938122076481	0.0283941199315334	0.535863433683826	0.519075055203865	294	tags=44%, list=10%, signal=40%	ANXA2/MMP14/CLEC3B/S100A10
GO:1903319	BP	GO:1903319	positive regulation of protein maturation	9	-0.637832612262791	-1.56938122076481	0.0283941199315334	0.535863433683826	0.519075055203865	294	tags=44%, list=10%, signal=40%	ANXA2/MMP14/CLEC3B/S100A10
GO:0035254	MF	GO:0035254	glutamate receptor binding	9	-0.635358425970206	-1.56329350836252	0.0287857567985525	0.535863433683826	0.519075055203865	409	tags=56%, list=13%, signal=48%	PLCG1/HIP1/FLOT1/NHERF1/NHERF2
GO:0061383	BP	GO:0061383	trabecula morphogenesis	3	-0.867861760953201	-1.55159130150306	0.0276859698691983	0.535863433683826	0.519075055203865	154	tags=75%, list=5%, signal=71%	FKBP1A/COL1A1/FKBP1A
GO:0014911	BP	GO:0014911	positive regulation of smooth muscle cell migration	9	0.667576968968567	1.54911641455433	0.0278869668002043	0.535863433683826	0.519075055203865	142	tags=22%, list=5%, signal=21%	S100A11/DOCK7
GO:0045620	BP	GO:0045620	negative regulation of lymphocyte differentiation	9	0.667254348884988	1.54836777268924	0.0278869668002043	0.535863433683826	0.519075055203865	331	tags=44%, list=11%, signal=40%	SLC4A2/CD74/HMGB1/FGL2
GO:0019829	MF	GO:0019829	ATPase-coupled monoatomic cation transmembrane transporter activity	17	0.554167368005902	1.54665540972557	0.0290143221649701	0.535863433683826	0.519075055203865	704	tags=41%, list=23%, signal=32%	TCIRG1/ATP6V0D1/ATP6V1D/ATP6V1E1/ATP1A2/ATP6V1F/ATP6V1B2
GO:0051131	BP	GO:0051131	chaperone-mediated protein complex assembly	9	0.664747534431253	1.54255069451094	0.0278869668002043	0.535863433683826	0.519075055203865	728	tags=78%, list=24%, signal=60%	PFDN6/PTGES3/HSP90AB1/CCT2/CLU/HSPD1/HSP90AA1
GO:0016471	CC	GO:0016471	vacuolar proton-transporting V-type ATPase complex	9	0.664406287393114	1.54175882868457	0.0288569242193104	0.535863433683826	0.519075055203865	704	tags=67%, list=23%, signal=52%	TCIRG1/ATP6V0D1/ATP6V1D/ATP6V1E1/ATP6V1F/ATP6V1B2
GO:0045124	BP	GO:0045124	regulation of bone resorption	9	0.661565382173418	1.53516649085299	0.0293419032216714	0.535863433683826	0.519075055203865	572	tags=44%, list=19%, signal=36%	TFRC/SLC4A2/CSK/INPP5D
GO:0046850	BP	GO:0046850	regulation of bone remodeling	9	0.661565382173418	1.53516649085299	0.0293419032216714	0.535863433683826	0.519075055203865	572	tags=44%, list=19%, signal=36%	TFRC/SLC4A2/CSK/INPP5D
GO:0042558	BP	GO:0042558	pteridine-containing compound metabolic process	11	0.618393161127945	1.5304786429215	0.0288104557423067	0.535863433683826	0.519075055203865	538	tags=45%, list=17%, signal=38%	TYMS/QDPR/DHFR/GART/ATIC
GO:0060590	MF	GO:0060590	ATPase regulator activity	20	0.524714978001507	1.51948886076941	0.028804777401958	0.535863433683826	0.519075055203865	779	tags=60%, list=25%, signal=45%	DNAJA1/PFN1/DNAJA2/HSCB/BAG3/DNAJB1/HSPH1/GRPEL1/CCAR2/DNAJB6/TOR1AIP1/ATP6AP1
GO:0034308	BP	GO:0034308	primary alcohol metabolic process	21	0.514250043719855	1.51279508334658	0.0291822271652237	0.535863433683826	0.519075055203865	513	tags=41%, list=17%, signal=34%	ALDH1A3/RDH11/AKR1B1/SULT1A3/ALDH1A1/ACSS2/PARK7/ALDH1B1/ACSS1
GO:0006213	BP	GO:0006213	pyrimidine nucleoside metabolic process	5	0.77274774417823	1.50528297999032	0.0276758645837401	0.535863433683826	0.519075055203865	317	tags=60%, list=10%, signal=54%	NT5C3A/ERH/DPYD
GO:0031674	CC	GO:0031674	I band	47	0.41654193546233	1.46514510174252	0.0282484161450874	0.535863433683826	0.519075055203865	1065	tags=53%, list=35%, signal=35%	FLNA/CSRP1/PDLIM7/HSPB1/CRYAB/DES/PGM5/SYNPO/FLNA/NEXN/BAG3/MYL9/PDLIM3/SYNPO2/CAB39/BIN1/ALDOA/PPP2R5A/DNAJB6/PPP1R12B/FLNC/ACTN4/PDLIM4/FLNB/CFL2/ALDOA/FERMT2
GO:0002702	BP	GO:0002702	positive regulation of production of molecular mediator of immune response	26	0.475777013279905	1.46489149291874	0.0280427790219004	0.535863433683826	0.519075055203865	821	tags=42%, list=27%, signal=31%	TFRC/MIF/GPI/PTPRC/TRAF6/CD74/MYD88/STAT6/RIGI/PHB1/DDX21
GO:0031466	CC	GO:0031466	Cul5-RING ubiquitin ligase complex	3	0.862583730084144	1.42386094034039	0.0283724406679879	0.535863433683826	0.519075055203865	281	tags=67%, list=9%, signal=61%	ELOC/ELOB
GO:0019372	BP	GO:0019372	lipoxygenase pathway	3	0.861631880131772	1.42228972827022	0.0289027513650339	0.535863433683826	0.519075055203865	164	tags=33%, list=5%, signal=32%	GPX1
GO:2000193	BP	GO:2000193	positive regulation of fatty acid transport	3	0.8603515625	1.42017631689515	0.0289027513650339	0.535863433683826	0.519075055203865	432	tags=100%, list=14%, signal=86%	MIF/ACSL1/FABP3
GO:0044283	BP	GO:0044283	small molecule biosynthetic process	152	0.311800922487614	1.33187870529618	0.028257412479871	0.535863433683826	0.519075055203865	476	tags=24%, list=15%, signal=22%	CRTC2/FDPS/ALDH1A3/MIF/ACSS3/NPC1L1/OSBP/GPI/HSD17B10/AKR1B1/CYB5R3/ACADM/QDPR/NDUFA9/SLC25A11/AACS/PTGES3/CD74/ALDH1A1/LTA4H/COQ6/GOT1/MGST3/PRKACA/ACSS2/DPYD/PGK1/ENO1/DHFR/PARK7/ACADL/PNP/NFKB1/ASNS/PNPO/CREB1/IMPA1
GO:0045921	BP	GO:0045921	positive regulation of exocytosis	27	-0.536680332614825	-1.78519941239062	0.0307894044520639	0.54625671430109	0.529142718662572	102	tags=33%, list=3%, signal=33%	LAMP1/ANXA2/VAMP8/RAB5A/FGG/S100A10/AP1G1/FGB/FGA
GO:0120020	MF	GO:0120020	cholesterol transfer activity	5	-0.794519130465912	-1.63538455533359	0.0301839521130357	0.54625671430109	0.529142718662572	496	tags=80%, list=16%, signal=67%	APOB/APOE/APOA1/APOA4
GO:0032968	BP	GO:0032968	positive regulation of transcription elongation by RNA polymerase II	6	-0.734964414007385	-1.62497203397194	0.0304896123875981	0.54625671430109	0.529142718662572	401	tags=83%, list=13%, signal=73%	CCNK/TCERG1/CDC73/BRD4/SUPT6H
GO:0046474	BP	GO:0046474	glycerophospholipid biosynthetic process	34	-0.4535361599902	-1.5741235057335	0.0309604566990198	0.54625671430109	0.529142718662572	476	tags=32%, list=15%, signal=28%	FABP5/VAC14/APOA1/PCYT1A/PCYT2/PI4KA/DGKZ/PIGT/PIP4K2A/CDS2/DPM3
GO:1902176	BP	GO:1902176	negative regulation of oxidative stress-induced intrinsic apoptotic signaling pathway	10	0.633803996690433	1.53226373113147	0.0306978160761877	0.54625671430109	0.529142718662572	463	tags=50%, list=15%, signal=43%	GPX1/HSPB1/PARK7/PPIA/SOD2
GO:1903405	BP	GO:1903405	protein localization to nuclear body	10	0.633086359454561	1.530528794914	0.0311812363380032	0.54625671430109	0.529142718662572	1022	tags=82%, list=33%, signal=55%	CCT2/CCT3/TCP1/CCT5/CCT3/MEPCE/CCT8/CCT6A/CCT7
GO:1904867	BP	GO:1904867	protein localization to Cajal body	10	0.633086359454561	1.530528794914	0.0311812363380032	0.54625671430109	0.529142718662572	1022	tags=82%, list=33%, signal=55%	CCT2/CCT3/TCP1/CCT5/CCT3/MEPCE/CCT8/CCT6A/CCT7
GO:1904869	BP	GO:1904869	regulation of protein localization to Cajal body	10	0.633086359454561	1.530528794914	0.0311812363380032	0.54625671430109	0.529142718662572	1022	tags=82%, list=33%, signal=55%	CCT2/CCT3/TCP1/CCT5/CCT3/MEPCE/CCT8/CCT6A/CCT7
GO:1904871	BP	GO:1904871	positive regulation of protein localization to Cajal body	10	0.633086359454561	1.530528794914	0.0311812363380032	0.54625671430109	0.529142718662572	1022	tags=82%, list=33%, signal=55%	CCT2/CCT3/TCP1/CCT5/CCT3/MEPCE/CCT8/CCT6A/CCT7
GO:1990173	BP	GO:1990173	protein localization to nucleoplasm	10	0.633086359454561	1.530528794914	0.0311812363380032	0.54625671430109	0.529142718662572	1022	tags=82%, list=33%, signal=55%	CCT2/CCT3/TCP1/CCT5/CCT3/MEPCE/CCT8/CCT6A/CCT7
GO:0050922	BP	GO:0050922	negative regulation of chemotaxis	10	0.632917275587541	1.53012002330904	0.0311812363380032	0.54625671430109	0.529142718662572	492	tags=50%, list=16%, signal=42%	MIF/CORO1B/ELANE/HDAC6/PADI2
GO:0120254	BP	GO:0120254	olefinic compound metabolic process	24	0.501420648132557	1.5215451202322	0.0303992617589938	0.54625671430109	0.529142718662572	298	tags=33%, list=10%, signal=30%	ALDH1A3/EPHX2/GPX1/RDH11/AKR1B1/PTGES3/ALDH1A1/MGST3
GO:0045505	MF	GO:0045505	dynein intermediate chain binding	7	0.699329413300591	1.51022668683782	0.0304656788995997	0.54625671430109	0.529142718662572	644	tags=71%, list=21%, signal=57%	RAN/DYNLL2/BAG3/PAFAH1B1/HTT
GO:0006220	BP	GO:0006220	pyrimidine nucleotide metabolic process	21	0.512186796235979	1.50672552499175	0.0305829448734008	0.54625671430109	0.529142718662572	1115	tags=62%, list=36%, signal=40%	NME2/TYMS/NME1/DCTPP1/DPYD/PRPS1/DUT/AK3/CMPK1/UMPS/SHMT1/UPP1/NT5C
GO:0014003	BP	GO:0014003	oligodendrocyte development	5	0.769157033966459	1.49828841415874	0.0306677729553185	0.54625671430109	0.529142718662572	600	tags=60%, list=20%, signal=48%	EIF2B3/CLU/EIF2B5
GO:0043069	BP	GO:0043069	negative regulation of programmed cell death	197	0.298869449503798	1.3214696391184	0.0306698191405333	0.54625671430109	0.529142718662572	752	tags=34%, list=24%, signal=28%	NME2/TPT1/HSPB6/FLNA/DNAJA1/COPS5/TFRC/MIF/PRDX5/PTRH2/CFL1/SERPINB9/NUP62/GPX1/WFS1/GPI/SLC25A4/CXCL12/AKR1B1/SRSF6/RPL10/HSPB1/CD74/XPNPEP1/HSP90AB1/CRYAB/PSME3/MNT/ENO1/PARK7/FLNA/BAG6/MAP2K4/CORO1A/BAG3/PPIA/NFKB1/ASNS/SOD2/API5/NCKAP1L/CREB1/RPS6KB1/VDAC2/HCLS1/GLO1/CLU/ARMC10/ITGA5/MGMT/PDCD4/CD44/HSPD1/ADAR/FABP1/HTT/PAK2/PTK2/CDK1/DDX3X/PRKAA1/CCAR2/SOD1/TXNDC5/UFM1/DNAJB6/HDAC1/KDM1A
GO:1902494	CC	GO:1902494	catalytic complex	456	0.259798712629061	1.25653767590691	0.0304911342828704	0.54625671430109	0.529142718662572	1094	tags=40%, list=36%, signal=30%	PLOD1/SF3A3/CSNK2B/HNRNPA3/IKBKB/PRPF19/UBE2I/ZC3H13/PCNA/PAFAH1B3/PRPS2/CDK7/PSMD12/NDUFB11/COX7A2L/NDUFS8/PDCD6/ATP5PO/ELOC/LDHB/TCIRG1/AIMP2/DYNLL2/PSMC3/PRKAR2B/HSD17B10/RBBP4/CYB5R3/PSMC1/FCN1/BCS1L/ATP6V0D1/GNB1/CUL9/ERH/NDUFA9/PSMB10/PTGES3/PPP1CB/HSPB1/VIRMA/NDUFS2/ELOB/PRKACA/ATP5F1C/PSME3/NDUFV1/DERL1/FNTA/ENO1/TEP1/SMARCD2/BRCC3/POLR1C/RUVBL2/DDA1/PPP3R1/NDUFB5/SPG7/PPP1CA/DDOST/PPP2CB…
GO:0033177	CC	GO:0033177	proton-transporting two-sector ATPase complex, proton-transporting domain	9	0.659252046242667	1.52979838076339	0.0312818209713516	0.546811742794376	0.529680358344032	210	tags=33%, list=7%, signal=31%	ATP5PO/TCIRG1/ATP6V0D1
GO:1902041	BP	GO:1902041	regulation of extrinsic apoptotic signaling pathway via death domain receptors	12	-0.595510814117553	-1.61076244766922	0.0314449005041808	0.548454352530064	0.53127150579996	73	tags=25%, list=2%, signal=25%	FGG/FGB/FGA
GO:0007156	BP	GO:0007156	homophilic cell adhesion via plasma membrane adhesion molecules	22	-0.526575806549552	-1.65052917361141	0.0319078241706173	0.549994603841014	0.532763501678019	463	tags=41%, list=15%, signal=35%	CDH17/CDH5/HMCN2/DSG3/PTK7/CDHR2/PCDH7/DSG2/PECAM1
GO:0032905	BP	GO:0032905	transforming growth factor beta1 production	5	-0.790973249560377	-1.62808595339236	0.0320587083446345	0.549994603841014	0.532763501678019	615	tags=80%, list=20%, signal=64%	AGT/LUM/CD2AP/COL3A1
GO:0072562	CC	GO:0072562	blood microparticle	69	-0.4139944010386	-1.61232934934791	0.0316226058712704	0.549994603841014	0.532763501678019	620	tags=44%, list=20%, signal=36%	C8G/CD5L/AGT/F13A1/C3/DNPEP/CP/JCHAIN/C1QB/SERPINF2/APOE/ITIH1/APOA1/AMBP/FCN2/APOA4/F2/SLC4A1/CFH/ITIH4/PLG/HBB/ITIH4/HBB/PZP/FGG/HP/FGB/C9/FN1/FGA
GO:0043195	CC	GO:0043195	terminal bouton	7	-0.698109469501842	-1.60915793349493	0.0320046051629383	0.549994603841014	0.532763501678019	654	tags=71%, list=21%, signal=56%	MICAL1/SYNJ1/AP3D1/CYFIP1/RAB5A
GO:0085029	BP	GO:0085029	extracellular matrix assembly	17	-0.5488639651903	-1.60716072330386	0.03211572504827	0.549994603841014	0.532763501678019	342	tags=42%, list=11%, signal=38%	PLOD3/MYH11/QSOX1/TNXB/FKBP10/EFEMP2/COL1A2/COL3A1
GO:0043488	BP	GO:0043488	regulation of mRNA stability	48	-0.42939784239994	-1.59270614508449	0.0320891186261322	0.549994603841014	0.532763501678019	62	tags=4%, list=2%, signal=4%	YBX1/ALKBH5
GO:0060191	BP	GO:0060191	regulation of lipase activity	8	-0.663596278827696	-1.57473604283428	0.0317290692077258	0.549994603841014	0.532763501678019	435	tags=75%, list=14%, signal=65%	PDGFRB/PLIN5/GNAQ/APOA4/APOC3/PLAA
GO:0010522	BP	GO:0010522	regulation of calcium ion transport into cytosol	3	-0.862055963918131	-1.54121150994731	0.0321569425632851	0.549994603841014	0.532763501678019	252	tags=100%, list=8%, signal=92%	BAK1/CAV1
GO:0060402	BP	GO:0060402	calcium ion transport into cytosol	3	-0.862055963918131	-1.54121150994731	0.0321569425632851	0.549994603841014	0.532763501678019	252	tags=100%, list=8%, signal=92%	BAK1/CAV1
GO:0016504	MF	GO:0016504	peptidase activator activity	19	-0.533183936869528	-1.62400333138991	0.0324281978615375	0.553441243503574	0.536102159553613	187	tags=25%, list=6%, signal=24%	CAV1/FBLN1/ADRM1/RPS27L/FN1
GO:2001138	BP	GO:2001138	regulation of phospholipid transport	3	-0.861653645833333	-1.54049223267425	0.0325008638217784	0.553491105771746	0.536150459657664	429	tags=100%, list=14%, signal=86%	APOE/APOA1
GO:0033344	BP	GO:0033344	cholesterol efflux	11	-0.611900273144922	-1.61152474385104	0.0327879618631905	0.55362822414102	0.536283282165465	606	tags=64%, list=20%, signal=51%	COMT/APOB/APOE/APOA1/APOA4/CAV1/APOC3
GO:0003401	BP	GO:0003401	axis elongation	4	-0.803727761752157	-1.56212472721776	0.0327728750419102	0.55362822414102	0.536283282165465	320	tags=75%, list=10%, signal=67%	YAP1/PTK7/TNC
GO:1905684	BP	GO:1905684	regulation of plasma membrane repair	4	-0.80355555788093	-1.5617900318916	0.0327728750419102	0.55362822414102	0.536283282165465	294	tags=75%, list=10%, signal=68%	ANXA2/AHNAK/S100A10
GO:0008187	MF	GO:0008187	poly-pyrimidine tract binding	10	0.630297474756362	1.52378647884204	0.0326314979975622	0.55362822414102	0.536283282165465	722	tags=60%, list=23%, signal=46%	PTBP1/FMR1/U2AF2/SSB/HNRNPC/PABPC1
GO:0099634	CC	GO:0099634	postsynaptic specialization membrane	8	-0.66062751639296	-1.56769107082683	0.032882839664548	0.554051413116461	0.536693212806334	180	tags=38%, list=6%, signal=35%	SCRIB/GPHN/ADRA2A
GO:0036293	BP	GO:0036293	response to decreased oxygen levels	68	-0.392823349452615	-1.53118273992295	0.0329826372625906	0.554555528211693	0.537181534185324	236	tags=12%, list=8%, signal=11%	ACAA2/CAV1/CLCA1/ADO/MMP14/XRCC1/CASP3/ALKBH5
GO:0055090	BP	GO:0055090	acylglycerol homeostasis	5	-0.78983569979866	-1.62574449773711	0.033183562699077	0.555057102093012	0.537667393965576	377	tags=100%, list=12%, signal=88%	APOE/APOA1/APOA4/APOC3
GO:0097035	BP	GO:0097035	regulation of membrane lipid distribution	7	-0.693973195664843	-1.59962372983392	0.0331408503011724	0.555057102093012	0.537667393965576	706	tags=71%, list=23%, signal=55%	PLSCR1/GBA2/PRKCD/SLC4A1/TMEM30B
GO:0008236	MF	GO:0008236	serine-type peptidase activity	35	-0.445032437830749	-1.54935296157358	0.0332222937870692	0.555057102093012	0.537667393965576	494	tags=29%, list=16%, signal=24%	CPD/C2/MMP9/DPP7/F2/PLG/MMP14/HP/CELA2A/CFD
GO:0015934	CC	GO:0015934	large ribosomal subunit	60	0.396207213584416	1.46415162937172	0.033642332194861	0.559718130604647	0.54218239439274	1007	tags=50%, list=33%, signal=34%	RPL26/RPL21/RPL24/MRPL1/RPL11/RPL13A/RPL9/MRPL19/RPL27A/RPL10/RPL10A/RPL35/RPL28/GADD45GIP1/RPL27/RSL1D1/RPL23A/RPL15/MRPL10/RPL18/SNU13/RPL7/RPL3/MRPL4/RPL8/RPL17/RPL12/RPL38/RPL5/RPLP0
GO:0009896	BP	GO:0009896	positive regulation of catabolic process	120	-0.324148178833482	-1.40529766162049	0.0336382030294357	0.559718130604647	0.54218239439274	110	tags=15%, list=4%, signal=15%	PLIN5/PRKCD/ROCK2/TOM1/APOE/TARDBP/SLC4A4/APOA4/CNOT2/AKT2/CAV1/ADRA2A/PIP4K2A/YBX1/SNX18/DDRGK1/RALB/ALKBH5
GO:0006906	BP	GO:0006906	vesicle fusion	33	-0.498751364081369	-1.70764338291334	0.0339250616707078	0.559728252429806	0.542192199105326	529	tags=39%, list=17%, signal=33%	SEC22B/CHMP6/TOM1/ANXA2/STX7/SEPTIN8/CHMP4C/CHMP1A/VAMP8/EEA1/PIP4K2A/CHMP4B/SNAP23
GO:0090174	BP	GO:0090174	organelle membrane fusion	33	-0.498751364081369	-1.70764338291334	0.0339250616707078	0.559728252429806	0.542192199105326	529	tags=39%, list=17%, signal=33%	SEC22B/CHMP6/TOM1/ANXA2/STX7/SEPTIN8/CHMP4C/CHMP1A/VAMP8/EEA1/PIP4K2A/CHMP4B/SNAP23
GO:0043487	BP	GO:0043487	regulation of RNA stability	50	-0.427850511143966	-1.59332521187345	0.0337891801538744	0.559728252429806	0.542192199105326	62	tags=4%, list=2%, signal=4%	YBX1/ALKBH5
GO:0046390	BP	GO:0046390	ribose phosphate biosynthetic process	90	0.349590647456988	1.38738018169	0.0338392863238677	0.559728252429806	0.542192199105326	786	tags=35%, list=26%, signal=27%	NME2/PRPS2/NDUFB11/NDUFS8/ATP5PO/ACSL1/NME1/NDUFA9/IMPDH2/AK4/NDUFS2/ATP5F1C/ACSS2/ACSL4/NDUFV1/ENO1/NDUFB5/NDUFA6/GART/GMPS/ACSS1/ATIC/PPCS/PYGL/GCDH/ALDOA/SLC25A1/PRPS1/AK3/NDUFS1/ATP5F1A/CMPK1
GO:0098641	MF	GO:0098641	cadherin binding involved in cell-cell adhesion	10	0.624814179296968	1.51053024378612	0.0340817608381201	0.560716339591146	0.543149329906905	525	tags=40%, list=17%, signal=33%	S100A11/PPP1CA/RAB10/TMOD3
GO:0032722	BP	GO:0032722	positive regulation of chemokine production	16	0.54488417346749	1.5068128212702	0.0341262590754188	0.560716339591146	0.543149329906905	659	tags=38%, list=21%, signal=30%	OAS1/MIF/CD74/HMGB1/MYD88/DDX3X
GO:0008088	BP	GO:0008088	axo-dendritic transport	19	0.527823675178207	1.50835013508329	0.03434431823884	0.563133284180649	0.545490552627769	697	tags=47%, list=23%, signal=37%	BLOC1S3/ACTR10/HSPB1/SPG7/HDAC6/AP3S1/PAFAH1B1/SOD1/MAP1A
GO:0060351	BP	GO:0060351	cartilage development involved in endochondral bone morphogenesis	3	-0.858073877011453	-1.53409220629295	0.0345643920504519	0.565573227448219	0.547854053487684	115	tags=67%, list=4%, signal=64%	COL1A1/COL2A1
GO:0008347	BP	GO:0008347	glial cell migration	20	-0.499271780145985	-1.53639340626283	0.0347005929718766	0.566633551079861	0.548881157620998	106	tags=30%, list=3%, signal=29%	SCRIB/CD9/CERS2/MMP14/RRAS2/COL3A1
GO:0070972	BP	GO:0070972	protein localization to endoplasmic reticulum	24	-0.52789028146202	-1.70046229524135	0.0355522808780346	0.570962480486747	0.553074463470224	217	tags=33%, list=7%, signal=31%	UBAC2/MAN1A1/SRPRB/SPCS3/SEC61A1/MIA3/CHMP4B/DDRGK1
GO:0035150	BP	GO:0035150	regulation of tube size	30	-0.476054413857305	-1.61948950433755	0.0361887761699639	0.570962480486747	0.553074463470224	410	tags=55%, list=13%, signal=48%	RAP1GDS1/ITGA1/ROCK1/AGT/CPS1/SERPINF2/ROCK2/ITGA4/APOE/PLOD3/CAV1/HBB/ADRA2A/HBB/FGG/FGB/FGA
GO:0035296	BP	GO:0035296	regulation of tube diameter	30	-0.476054413857305	-1.61948950433755	0.0361887761699639	0.570962480486747	0.553074463470224	410	tags=55%, list=13%, signal=48%	RAP1GDS1/ITGA1/ROCK1/AGT/CPS1/SERPINF2/ROCK2/ITGA4/APOE/PLOD3/CAV1/HBB/ADRA2A/HBB/FGG/FGB/FGA
GO:0097746	BP	GO:0097746	blood vessel diameter maintenance	30	-0.476054413857305	-1.61948950433755	0.0361887761699639	0.570962480486747	0.553074463470224	410	tags=55%, list=13%, signal=48%	RAP1GDS1/ITGA1/ROCK1/AGT/CPS1/SERPINF2/ROCK2/ITGA4/APOE/PLOD3/CAV1/HBB/ADRA2A/HBB/FGG/FGB/FGA
GO:0032732	BP	GO:0032732	positive regulation of interleukin-1 production	13	0.589430809234956	1.54417544883148	0.0357282417007981	0.570962480486747	0.553074463470224	439	tags=38%, list=14%, signal=33%	ORM1/GSDMD/HSPB1/HMGB1/MYD88
GO:0007368	BP	GO:0007368	determination of left/right symmetry	3	-0.857424287190415	-1.53293084861916	0.0355995448936737	0.570962480486747	0.553074463470224	257	tags=67%, list=8%, signal=61%	NCLN/TMED2
GO:0060972	BP	GO:0060972	left/right pattern formation	3	-0.857424287190415	-1.53293084861916	0.0355995448936737	0.570962480486747	0.553074463470224	257	tags=67%, list=8%, signal=61%	NCLN/TMED2
GO:0060395	BP	GO:0060395	SMAD protein signal transduction	9	0.654011574078441	1.51763783325055	0.0356466441496473	0.570962480486747	0.553074463470224	16	tags=11%, list=1%, signal=11%	CSNK2B
GO:0014909	BP	GO:0014909	smooth muscle cell migration	17	0.542149127968893	1.51311305945058	0.0357282417007981	0.570962480486747	0.553074463470224	285	tags=22%, list=9%, signal=20%	S100A11/TPM1/DOCK7/CORO1B
GO:0090670	BP	GO:0090670	RNA localization to Cajal body	11	0.608721865924486	1.50654288216489	0.0360734421037044	0.570962480486747	0.553074463470224	1022	tags=75%, list=33%, signal=50%	CCT2/RUVBL2/CCT3/TCP1/CCT5/CCT3/CCT8/CCT6A/CCT7
GO:0090671	BP	GO:0090671	telomerase RNA localization to Cajal body	11	0.608721865924486	1.50654288216489	0.0360734421037044	0.570962480486747	0.553074463470224	1022	tags=75%, list=33%, signal=50%	CCT2/RUVBL2/CCT3/TCP1/CCT5/CCT3/CCT8/CCT6A/CCT7
GO:0090672	BP	GO:0090672	telomerase RNA localization	11	0.608721865924486	1.50654288216489	0.0360734421037044	0.570962480486747	0.553074463470224	1022	tags=75%, list=33%, signal=50%	CCT2/RUVBL2/CCT3/TCP1/CCT5/CCT3/CCT8/CCT6A/CCT7
GO:0090685	BP	GO:0090685	RNA localization to nucleus	11	0.608721865924486	1.50654288216489	0.0360734421037044	0.570962480486747	0.553074463470224	1022	tags=75%, list=33%, signal=50%	CCT2/RUVBL2/CCT3/TCP1/CCT5/CCT3/CCT8/CCT6A/CCT7
GO:1904872	BP	GO:1904872	regulation of telomerase RNA localization to Cajal body	11	0.608721865924486	1.50654288216489	0.0360734421037044	0.570962480486747	0.553074463470224	1022	tags=75%, list=33%, signal=50%	CCT2/RUVBL2/CCT3/TCP1/CCT5/CCT3/CCT8/CCT6A/CCT7
GO:1904874	BP	GO:1904874	positive regulation of telomerase RNA localization to Cajal body	11	0.608721865924486	1.50654288216489	0.0360734421037044	0.570962480486747	0.553074463470224	1022	tags=75%, list=33%, signal=50%	CCT2/RUVBL2/CCT3/TCP1/CCT5/CCT3/CCT8/CCT6A/CCT7
GO:0043009	BP	GO:0043009	chordate embryonic development	98	-0.342169310374858	-1.44183911835825	0.0360739715856157	0.570962480486747	0.553074463470224	409	tags=26%, list=13%, signal=23%	PLCG1/FUT8/RPL13/PLOD3/MSH2/YAP1/MATR3/CNOT2/KIAA1217/TMED2/SIN3A/PTK7/PRKDC/FKBP10/PLG/RRM2/COL1A1/MMP14/PHGDH/YBX1/MARCKS/COL3A1/CASP3/SUPT6H/COL2A1
GO:0051046	BP	GO:0051046	regulation of secretion	124	-0.309153779823895	-1.35248310934027	0.0358776649846989	0.570962480486747	0.553074463470224	415	tags=23%, list=13%, signal=20%	MYO6/SLC12A2/LAMP1/APOE/TARDBP/CHGA/ANXA2/MAOB/SEC24A/MYO18A/CYBA/F2/P3H1/NHERF1/LLGL2/S100A8/ADRA2A/VAMP8/RAB5A/FGG/S100A10/EIPR1/SLC25A22/CELA2A/AP1G1/FGB/PFN2/FGA
GO:0048284	BP	GO:0048284	organelle fusion	44	-0.437558307785796	-1.59630885689277	0.0363628774137863	0.571423230545801	0.553520778421581	398	tags=32%, list=13%, signal=28%	TOM1/CHCHD3/ANXA2/BAK1/STOML2/STX7/SEPTIN8/CHMP4C/CHMP1A/VAMP8/EEA1/PIP4K2A/CHMP4B/SNAP23
GO:0032506	BP	GO:0032506	cytokinetic process	17	-0.539954914466076	-1.5810736100773	0.0365041561770587	0.571423230545801	0.553520778421581	324	tags=35%, list=11%, signal=32%	CHMP6/ARF1/CHMP4C/CHMP1A/CHMP4B/SNX18
GO:1902042	BP	GO:1902042	negative regulation of extrinsic apoptotic signaling pathway via death domain receptors	8	-0.654893168624825	-1.55408327283167	0.0363441536310376	0.571423230545801	0.553520778421581	73	tags=38%, list=2%, signal=37%	FGG/FGB/FGA
GO:0009792	BP	GO:0009792	embryo development ending in birth or egg hatching	99	-0.335095946063845	-1.41685954617009	0.0365059951974195	0.571423230545801	0.553520778421581	409	tags=25%, list=13%, signal=23%	PLCG1/FUT8/RPL13/PLOD3/MSH2/YAP1/MATR3/CNOT2/KIAA1217/TMED2/SIN3A/PTK7/PRKDC/FKBP10/PLG/RRM2/COL1A1/MMP14/PHGDH/YBX1/MARCKS/COL3A1/CASP3/SUPT6H/COL2A1
GO:0017157	BP	GO:0017157	regulation of exocytosis	49	-0.436255208957855	-1.61556984451675	0.0367642904534221	0.574333482358973	0.556339853255992	110	tags=18%, list=4%, signal=18%	ADRA2A/VAMP8/RAB5A/FGG/S100A10/AP1G1/FGB/PFN2/FGA
GO:0030332	MF	GO:0030332	cyclin binding	6	-0.726364560156331	-1.60595815828235	0.036928336940833	0.575762832932123	0.557724422870238	3	tags=33%, list=0%, signal=33%	RBM4/CDK4
GO:0051246	BP	GO:0051246	regulation of protein metabolic process	509	0.253875578854525	1.23809489246111	0.0371794871794872	0.578541980894922	0.560416501283374	767	tags=31%, list=25%, signal=28%	DAP/RPL26/TYMS/YBX2/IKBKB/UBE2I/FLNA/SNF8/DNAJA1/CHI3L1/PTBP1/CDKN2C/COPS5/TFRC/SARNP/MIF/MOB3A/SPINK1/IPO5/CDK7/S100A9/EIF4E/ISG15/XPO1/RPL11/SERPINB10/PFDN6/DOCK7/FMR1/WNK1/RPL13A/PDCD6/SERPINB9/OSBP/GPX1/MOB2/WFS1/AIMP2/PTPRC/PSMC3/COPS6/PRKAR2B/PSMC1/RPL10/LCP2/ETF1/IDE/TRAF6/HNRNPD/HSPB1/CD74/RAB7A/AHSG/HSP90AB1/U2AF2/CRYAB/ELOB/ZFP91/PDCD5/PRKACA/PRRC1/ASPH/POLDIP3/HMGB1/PSME3/DERL1/FNTA/EN…
GO:0032943	BP	GO:0032943	mononuclear cell proliferation	54	-0.420841014745941	-1.57544789376727	0.0375089852978885	0.581389272117272	0.563174588056085	18	tags=6%, list=1%, signal=6%	MS4A1/CASP3/ALKBH5
GO:0046651	BP	GO:0046651	lymphocyte proliferation	54	-0.420841014745941	-1.57544789376727	0.0375089852978885	0.581389272117272	0.563174588056085	18	tags=6%, list=1%, signal=6%	MS4A1/CASP3/ALKBH5
GO:0006721	BP	GO:0006721	terpenoid metabolic process	17	0.538710119796265	1.50351494721705	0.0376465084907875	0.582383414001735	0.56413758388883	258	tags=29%, list=8%, signal=27%	FDPS/ALDH1A3/RDH11/AKR1B1/ALDH1A1
GO:0001778	BP	GO:0001778	plasma membrane repair	13	-0.682294288458129	-1.89122185205211	0.0380999507325107	0.585385044094024	0.567045174158884	294	tags=54%, list=10%, signal=49%	CHMP6/ANXA2/CHMP4C/CHMP1A/AHNAK/S100A10/CHMP4B
GO:0051917	BP	GO:0051917	regulation of fibrinolysis	6	-0.721990417959294	-1.59628713393431	0.0380645836504977	0.585385044094024	0.567045174158884	727	tags=67%, list=24%, signal=51%	VTN/SERPINF2/F2/PLG
GO:0051918	BP	GO:0051918	negative regulation of fibrinolysis	6	-0.721990417959294	-1.59628713393431	0.0380645836504977	0.585385044094024	0.567045174158884	727	tags=67%, list=24%, signal=51%	VTN/SERPINF2/F2/PLG
GO:0048878	BP	GO:0048878	chemical homeostasis	202	0.292429559920174	1.29585224391454	0.038135593220339	0.585385044094024	0.567045174158884	687	tags=28%, list=22%, signal=23%	NME2/TPT1/CLIC2/CRTC2/FLNA/TGM2/OAS1/SURF4/RPS6/TFRC/CYB5R4/SLC2A4/S100A9/EPHX2/WNK1/NPC1L1/OSBP/GPX1/TCIRG1/WFS1/GPI/PTPRC/CXCL12/AKR1B1/ACOX1/SLC4A2/ATP6V0D1/SAR1B/CHERP/RAB7A/GOT1/PRKACA/PARK7/FLNA/DIAPH1/CORO1A/ELANE/ATOX1/FABP3/BDH2/ATP6V1D/SOD2/PFKM/GPLD1/PYGL/CLIC4/CES1/ATP1A2/ATP6V1F/SERPINF1/HTT/THY1/CALM3/DDX3X/PRKAA1/ERO1A/SOD1
GO:0048261	BP	GO:0048261	negative regulation of receptor-mediated endocytosis	7	-0.687338997898725	-1.58433175567499	0.0384433326171828	0.58783485096332	0.569418229597984	294	tags=86%, list=10%, signal=78%	ATXN2/ADIPOQ/PICALM/ANXA2/ANKRD13A/APOC3
GO:0006338	BP	GO:0006338	chromatin remodeling	122	0.327172675513061	1.35922381008541	0.0384095745428622	0.58783485096332	0.569418229597984	833	tags=37%, list=27%, signal=28%	H2AC21/TGM2/NPM3/H1-2/BTAF1/GPX1/FBL/RBBP4/H2AC18/MCM2/H1-3/HMGB1/SMARCD2/BRCC3/RUVBL2/RIOX2/H2AZ2/SSRP1/H1-10/MYD88/H2AX/HDAC6/SAMD1/SLFN11/PADI2/H2BC4/UHRF1/DMAP1/HNRNPC/TOP1/CDK1/PRKAA1/MACROH2A2/SMARCC1/GTF2B/NAA50/SF3B1/PHB1/HDAC1/KDM1A/HCFC1/H3C1/SMARCB1/DDX21/SMCHD1/SET
GO:0046753	BP	GO:0046753	non-lytic viral release	8	-0.648839441032702	-1.53971757589066	0.0386516980512766	0.589884376413328	0.571403544268164	174	tags=50%, list=6%, signal=47%	CHMP6/CHMP4C/CHMP1A/CHMP4B
GO:0005721	CC	GO:0005721	pericentric heterochromatin	5	-0.780169537628055	-1.6058483219032	0.0388115339066367	0.591186819737177	0.572665182584439	600	tags=60%, list=20%, signal=48%	DNMT1/BAZ1A/IKZF1
GO:0030307	BP	GO:0030307	positive regulation of cell growth	30	-0.468461078558069	-1.59365773708139	0.0390191548681715	0.593210752938331	0.574625706800274	374	tags=47%, list=12%, signal=41%	MAP1B/CIB1/GDI1/DNPH1/CYFIP1/YAP1/ERBB2/F2/EIF4G1/S100A8/MMP14/USP47/PLAA/FN1
GO:0042306	BP	GO:0042306	regulation of protein import into nucleus	22	0.50549498174527	1.50973338388613	0.0392106362047075	0.59498204382516	0.576341503880405	733	tags=48%, list=24%, signal=37%	FLNA/IPO5/RAN/MAPK14/FLNA/BAG3/HCLS1/DMAP1/CDK1/HSP90AA1/UFM1
GO:0008201	MF	GO:0008201	heparin binding	38	-0.440873171341145	-1.5767665989041	0.0392928933006433	0.595092368766994	0.576448372387702	496	tags=36%, list=16%, signal=30%	AAMP/APOB/FBN1/COL5A1/APOE/LTBP2/F2/CFH/TNXB/EFEMP2/CLEC3B/SERPIND1/COL28A1/FN1
GO:0005977	BP	GO:0005977	glycogen metabolic process	19	0.521404076871519	1.49000498986068	0.0399361022364217	0.597815442561205	0.579086133412628	676	tags=50%, list=22%, signal=39%	ACADM/PYGM/PTGES3/PPP1CB/PPP1CA/UGP2/PFKM/PYGL/PYGB/AGL
GO:0006458	BP	GO:0006458	'de novo' protein folding	19	0.520507201556751	1.48744200895285	0.0399361022364217	0.597815442561205	0.579086133412628	680	tags=50%, list=22%, signal=39%	SDF2/UGGT1/PTGES3/CD74/CCT2/DNAJB1/HSPH1/HSPA8/HSPD1/ERO1A
GO:0048024	BP	GO:0048024	regulation of mRNA splicing, via spliceosome	51	0.398101961478875	1.43306371360061	0.0396491917006342	0.597815442561205	0.579086133412628	1017	tags=47%, list=33%, signal=32%	SRSF4/PRPF19/PTBP1/FMR1/SRSF2/SRSF6/U2AF2/TRA2A/SNW1/RBM8A/NCL/SRSF7/PUF60/RBM25/SF1/SMU1/HNRNPL/NUP98/THRAP3/DDX17/UPF1/DDX5/PRDX6/RBM10
GO:0033500	BP	GO:0033500	carbohydrate homeostasis	48	0.401724834019719	1.42312293048834	0.04	0.597815442561205	0.579086133412628	672	tags=35%, list=22%, signal=28%	NME2/CRTC2/OAS1/RPS6/CYB5R4/SLC2A4/OSBP/GPX1/WFS1/GPI/PRKACA/PARK7/PFKM/GPLD1/PYGL/SERPINF1/PRKAA1
GO:0042593	BP	GO:0042593	glucose homeostasis	48	0.401724834019719	1.42312293048834	0.04	0.597815442561205	0.579086133412628	672	tags=35%, list=22%, signal=28%	NME2/CRTC2/OAS1/RPS6/CYB5R4/SLC2A4/OSBP/GPX1/WFS1/GPI/PRKACA/PARK7/PFKM/GPLD1/PYGL/SERPINF1/PRKAA1
GO:0042981	BP	GO:0042981	regulation of apoptotic process	321	0.270103603519314	1.2684705794562	0.0398406374501992	0.597815442561205	0.579086133412628	742	tags=30%, list=24%, signal=25%	RPL26/NME2/TPT1/HSPB6/FLNA/TGM2/DNAJA1/RPS6/COPS5/TFRC/ALDH1A3/MIF/PRDX5/S100A9/PTRH2/CFL1/SERPINB9/NUP62/GPX1/WFS1/GPI/SLC25A4/PTPRC/CXCL12/AKR1B1/SRSF6/RPL10/NME1/STAT1/TRAF6/HSPB1/CD74/HSP90AB1/CRYAB/PDCD5/HMGB1/PSME3/MNT/ENO1/PARK7/RUVBL2/FLNA/PPP1CA/BAG6/MAP2K4/CORO1A/BAG3/PPID/PPIA/NFKB1/ASNS/SOD2/API5/NCKAP1L/CREB1/RPS6KB1/KNG1/VDAC2/UTP11/GPLD1/HCLS1/GLO1/DMAP1/INPP5D/CLU/ARMC10/BIN1/RSL1…
GO:0120025	CC	GO:0120025	plasma membrane bounded cell projection	400	0.256777931047782	1.23079866532499	0.0399484536082474	0.597815442561205	0.579086133412628	744	tags=27%, list=24%, signal=24%	S100A11/NME2/BLOC1S3/VASP/FLNA/RPS6/CLCA1/STMN1/TPM1/MAP7/CFL1/DOCK7/FMR1/PDLIM7/RAN/ACTR10/WFS1/DYNLL2/GPI/PTPRC/PRKAR2B/ATP6V0D1/GNB1/ACADM/NME1/STAT1/ARPC2/HSPB1/ALDH1A1/HSP90AB1/STRN3/CRYAB/NUBP2/CORO1B/TBCC/PRKACA/TMEM231/ABLIM1/PARK7/EEF1A1/SYNPO/ARPC1A/FLNA/DIAPH1/RPL28/SPG7/CORO1C/PPP1CA/NEXN/RAB27A/DOCK10/ILK/MAP2K4/CORO1A/MAP1S/CLIP1/DAG1/RAB10/CD177/ATP6V1D/HDAC6/EPS8L3/PFKM/RPS6KB1/AR…
GO:0034358	CC	GO:0034358	plasma lipoprotein particle	11	-0.59737346933644	-1.57326637918956	0.0414343513311382	0.599950407325201	0.581154210618626	524	tags=64%, list=17%, signal=53%	APOBR/APOB/LSR/APOE/APOA1/APOA4/APOC3
GO:1990777	CC	GO:1990777	lipoprotein particle	11	-0.59737346933644	-1.57326637918956	0.0414343513311382	0.599950407325201	0.581154210618626	524	tags=64%, list=17%, signal=53%	APOBR/APOB/LSR/APOE/APOA1/APOA4/APOC3
GO:0042805	MF	GO:0042805	actinin binding	13	0.581739848733411	1.52402687125741	0.0405239111015159	0.599950407325201	0.581154210618626	446	tags=43%, list=15%, signal=37%	CSRP1/PDLIM7/DAG1/PDLIM3/SYNPO2/NFKB1
GO:0042572	BP	GO:0042572	retinol metabolic process	8	0.676095436133456	1.50639749921114	0.0407830342577488	0.599950407325201	0.581154210618626	258	tags=50%, list=8%, signal=46%	ALDH1A3/RDH11/AKR1B1/ALDH1A1
GO:0016234	CC	GO:0016234	inclusion body	24	0.496416038907072	1.50635879159961	0.0407523510971787	0.599950407325201	0.581154210618626	896	tags=50%, list=29%, signal=36%	NUP153/GPX1/BAG3/HDAC6/PSMC6/CLU/HTT/AGL/EPS15/NXF1/TDP2/NUP98
GO:0045581	BP	GO:0045581	negative regulation of T cell differentiation	8	0.673777919984871	1.50123387830198	0.0407830342577488	0.599950407325201	0.581154210618626	331	tags=50%, list=11%, signal=45%	SLC4A2/CD74/HMGB1/FGL2
GO:0008173	MF	GO:0008173	RNA methyltransferase activity	8	0.67029892913939	1.49348239407457	0.0407830342577488	0.599950407325201	0.581154210618626	800	tags=75%, list=26%, signal=56%	MRM1/FBL/TRMT5/TRMT1/MEPCE/NOP2
GO:0032602	BP	GO:0032602	chemokine production	19	0.517134398200987	1.47780362280892	0.0415335463258786	0.599950407325201	0.581154210618626	439	tags=32%, list=14%, signal=27%	OAS1/MIF/CD74/HMGB1/ELANE/MYD88
GO:0032642	BP	GO:0032642	regulation of chemokine production	19	0.517134398200987	1.47780362280892	0.0415335463258786	0.599950407325201	0.581154210618626	439	tags=32%, list=14%, signal=27%	OAS1/MIF/CD74/HMGB1/ELANE/MYD88
GO:0006729	BP	GO:0006729	tetrahydrobiopterin biosynthetic process	4	0.807413644744465	1.46952218166554	0.0418060200668896	0.599950407325201	0.581154210618626	335	tags=50%, list=11%, signal=45%	QDPR/DHFR
GO:0046146	BP	GO:0046146	tetrahydrobiopterin metabolic process	4	0.807413644744465	1.46952218166554	0.0418060200668896	0.599950407325201	0.581154210618626	335	tags=50%, list=11%, signal=45%	QDPR/DHFR
GO:0086013	BP	GO:0086013	membrane repolarization during cardiac muscle cell action potential	4	0.807298073130045	1.46931183712645	0.0418060200668896	0.599950407325201	0.581154210618626	360	tags=40%, list=12%, signal=35%	FLNA/FLNA
GO:0008033	BP	GO:0008033	tRNA processing	27	0.47261880499859	1.46846617870148	0.0411102477529072	0.599950407325201	0.581154210618626	1244	tags=63%, list=40%, signal=38%	PUS1/HSD17B10/TP53RK/TRMT5/TRMT1/SSB/RTCB/SARS1/LSM6/KARS1/QNG1/ELAC2/DDX1/RTRAF/LAGE3/RPP30/TRMT6
GO:0046640	BP	GO:0046640	regulation of alpha-beta T cell proliferation	6	0.7188530538121	1.46613512903376	0.0411861614497529	0.599950407325201	0.581154210618626	196	tags=33%, list=6%, signal=31%	PTPRC/SLC4A2
GO:0007254	BP	GO:0007254	JNK cascade	27	0.471707710386325	1.46563533149532	0.0415800740711081	0.599950407325201	0.581154210618626	1202	tags=70%, list=39%, signal=43%	DNAJA1/COPS5/HMGB1/MAP2K4/MYD88/NFKB1/AIDA/PDCD4/GPS1/PAFAH1B1/CRKL/MINK1/NCF1/CDC42/GSTP1/CDC42EP5/ZNF622/PRMT1/PYCARD
GO:0120111	CC	GO:0120111	neuron projection cytoplasm	23	0.485897571984308	1.45939039417869	0.0405616224648986	0.599950407325201	0.581154210618626	697	tags=48%, list=23%, signal=37%	BLOC1S3/FMR1/ACTR10/HSPB1/SPG7/MAP2K4/HDAC6/AP3S1/PAFAH1B1/SOD1/MAP1A
GO:0022627	CC	GO:0022627	cytosolic small ribosomal subunit	32	0.449916470497802	1.45883095632474	0.0403726708074534	0.599950407325201	0.581154210618626	659	tags=38%, list=21%, signal=30%	RPS10/RPS6/RPS23/RPS17/RPS26/RPS9/RPS16/RPS11/RPS15A/RPS7/RPS29/DDX3X
GO:0000049	MF	GO:0000049	tRNA binding	32	0.446847336349602	1.44887944710447	0.0403726708074534	0.599950407325201	0.581154210618626	930	tags=47%, list=30%, signal=33%	XPOT/PUS1/HSD17B10/EEF1A1/TRMT1/SSB/SLFN11/TARS1/YARS2/XPO5/MARS1/SARS1/KARS1/DTD2/EIF2S3
GO:1903706	BP	GO:1903706	regulation of hemopoiesis	66	0.367869296633372	1.38158705774269	0.0417310664605873	0.599950407325201	0.581154210618626	572	tags=29%, list=19%, signal=24%	NME2/CD101/ISG15/PRXL2A/PTPRC/SLC4A2/STAT1/TRAF6/CD74/HMGB1/FGL2/SMARCD2/MAPK14/ACIN1/PNP/NCKAP1L/CREB1/HCLS1/INPP5D
GO:0009260	BP	GO:0009260	ribonucleotide biosynthetic process	85	0.350117123135086	1.37445446457533	0.0413393798545439	0.599950407325201	0.581154210618626	613	tags=29%, list=20%, signal=24%	NME2/NDUFB11/NDUFS8/ATP5PO/ACSL1/NME1/NDUFA9/IMPDH2/AK4/NDUFS2/ATP5F1C/ACSS2/ACSL4/NDUFV1/ENO1/NDUFB5/NDUFA6/GART/GMPS/ACSS1/ATIC/PPCS/GCDH/ALDOA/SLC25A1
GO:0140657	MF	GO:0140657	ATP-dependent activity	178	0.298866414501599	1.30333726509891	0.041726618705036	0.599950407325201	0.581154210618626	1095	tags=46%, list=36%, signal=32%	DQX1/AFG2A/CDK7/DDX18/ACSS3/TAP2/BTAF1/TCIRG1/PSMC3/RBBP4/ACSL1/PSMC1/BCS1L/ATP6V0D1/MCM2/HSP90AB1/NUBP2/ATP5F1C/ACSS2/ACSL4/CCT2/RUVBL2/SPG7/ACIN1/DDX54/CCT3/MYD88/ATP6V1D/VPS4B/SLFN11/ATP6V1E1/RFC5/TCP1/ACSS1/PSMC6/MTREX/DDX6/HSPH1/TAP1/HSPA8/UBA1/ATP1A2/HSPD1/CCT5/EIF4A1/ATP6V1F/MSH3/DDX3X/RIGI/ATP6V1B2/MSH6/EIF4A2/CCT3/HSP90AA1/MCM7/ENTPD1/DHX58/ATP5F1A/DDX21/SMCHD1/CCT8/NSF/MYL6/VCP/CCT6A/GE…
GO:0071702	BP	GO:0071702	organic substance transport	548	-0.223411129697796	-1.17830590738364	0.0411422428690437	0.599950407325201	0.581154210618626	562	tags=22%, list=18%, signal=22%	TCN1/PCK2/RAB14/EXOC5/AP1M1/PDCD10/RBM22/SEC16A/M6PR/SEC22B/SORBS1/CHMP6/ESYT2/APOBR/IPO4/COG3/GDI1/ABCD3/DDX19B/RHOB/STARD10/APOB/PGRMC2/SNX2/AP3D1/FABP5/RAB5C/RAB2A/RANGAP1/ATP13A1/FABP2/CDH17/VTA1/EXOC2/PITPNB/CD2AP/DDX39B/PRKCD/RRBP1/BICD2/FABP6/MYO6/SLC12A2/AUP1/TOM1/PGRMC1/UBAC2/ABCC3/APOE/MAGOHB/HIP1/KPNB1/FLOT1/VIL1/TARDBP/LTBP2/AIFM1/ARF1/SLC4A4/APOA1/SCAMP2/CHGA/APOA4/ANXA2/TBC1D5/AKT2/…
GO:0048011	BP	GO:0048011	neurotrophin TRK receptor signaling pathway	7	-0.684342247362012	-1.57742417869527	0.042249484415178	0.601617250673854	0.582768832458505	772	tags=71%, list=25%, signal=54%	PTPN11/AKT1S1/AGT/CYFIP1/CASP3
GO:0035909	BP	GO:0035909	aorta morphogenesis	7	-0.682886540014036	-1.57406874071573	0.042249484415178	0.601617250673854	0.582768832458505	146	tags=86%, list=5%, signal=82%	RBPJ/NAGLU/PDGFRB/FKBP10/EFEMP2/COL3A1
GO:0007009	BP	GO:0007009	plasma membrane organization	49	-0.423745910316638	-1.56924456232911	0.0422895020238297	0.601617250673854	0.582768832458505	429	tags=30%, list=14%, signal=26%	PRKCD/COL5A1/SPTA1/FLOT1/ANXA2/AKT2/SLC4A1/NHERF1/CAV1/CHMP4C/CHMP1A/AHNAK/S100A10/CHMP4B/SNX18
GO:0001666	BP	GO:0001666	response to hypoxia	65	-0.401691621043379	-1.55327055878862	0.0422243521360624	0.601617250673854	0.582768832458505	236	tags=15%, list=8%, signal=14%	AIFM1/ALAD/ACAA2/CAV1/CLCA1/ADO/MMP14/XRCC1/CASP3/ALKBH5
GO:0005125	MF	GO:0005125	cytokine activity	13	0.57831333333346	1.51505017565082	0.0424421808700306	0.601617250673854	0.582768832458505	319	tags=31%, list=10%, signal=28%	MIF/GPI/CXCL12/HMGB1
GO:0035994	BP	GO:0035994	response to muscle stretch	8	0.668381411578494	1.48921000366332	0.0424143556280587	0.601617250673854	0.582768832458505	653	tags=50%, list=21%, signal=39%	GPI/MAPK14/NFKB1/PTK2
GO:0032259	BP	GO:0032259	methylation	42	0.416782378998952	1.42105215881323	0.0424528301886792	0.601617250673854	0.582768832458505	452	tags=26%, list=15%, signal=23%	ASMTL/TYMS/ZC3H13/MRM1/FBL/HSD17B10/ETF1/VIRMA/TRMT5/TRMT1/SNRPG
GO:0016705	MF	GO:0016705	oxidoreductase activity, acting on paired donors, with incorporation or reduction of molecular oxygen	23	-0.572385197843712	-1.83303466738069	0.042896958528388	0.605747798721151	0.586769972153619	226	tags=22%, list=7%, signal=20%	P4HA1/PHF2/P3H1/FMO5/ALKBH5
GO:1902622	BP	GO:1902622	regulation of neutrophil migration	7	0.694682838002711	1.50019224257765	0.042833607907743	0.605747798721151	0.586769972153619	496	tags=57%, list=16%, signal=48%	CD74/MYD88/NCKAP1L/RAC2
GO:0006067	BP	GO:0006067	ethanol metabolic process	5	0.762911242388081	1.48612185161575	0.0431177446102819	0.605854382061685	0.586873216282428	513	tags=67%, list=17%, signal=56%	SULT1A3/ACSS2/ALDH1B1/ACSS1
GO:0009124	BP	GO:0009124	nucleoside monophosphate biosynthetic process	22	0.490996276541411	1.46643091786794	0.0432098765432099	0.605854382061685	0.586873216282428	1139	tags=64%, list=37%, signal=40%	TYMS/PRPS2/IMPDH2/GART/GMPS/ATIC/PRPS1/DUT/CMPK1/ADSL/UMPS/SHMT1/UPP1/AMPD2
GO:0006112	BP	GO:0006112	energy reserve metabolic process	22	0.487792453584941	1.45686224033776	0.0432098765432099	0.605854382061685	0.586873216282428	676	tags=43%, list=22%, signal=34%	ACADM/PYGM/PTGES3/PPP1CB/PPP1CA/UGP2/PFKM/PYGL/PYGB/AGL
GO:0031406	MF	GO:0031406	carboxylic acid binding	50	0.396120227023567	1.41620743135765	0.0430769230769231	0.605854382061685	0.586873216282428	638	tags=34%, list=21%, signal=27%	PLOD1/NME2/TYMS/HIF1AN/S100A9/ACOX1/FCN1/DDAH1/DHFR/AGRN/PPIA/CD22/FABP3/YARS2/PYGL/SCLY/FABP1
GO:0061684	BP	GO:0061684	chaperone-mediated autophagy	9	0.646517431373488	1.50024762954836	0.0435483870967742	0.606161786448871	0.587170989818032	928	tags=78%, list=30%, signal=54%	EEF1A1/BAG3/CLU/HSPA8/HSP90AA1/GFAP/EEF1A2
GO:0019843	MF	GO:0019843	rRNA binding	22	0.501968155740429	1.49920001134842	0.0433868705907581	0.606161786448871	0.587170989818032	1163	tags=64%, list=38%, signal=40%	RPL11/RPL9/RPS9/RPL23A/RPS11/SBDS/DDX21/RPL8/RPL12/RPL5/RPLP0/RPS13/RPS4X/RPS3
GO:0042307	BP	GO:0042307	positive regulation of protein import into nucleus	20	0.511337519760195	1.48074992699531	0.043613707165109	0.606161786448871	0.587170989818032	728	tags=48%, list=24%, signal=37%	FLNA/IPO5/RAN/MAPK14/FLNA/BAG3/HCLS1/DMAP1/CDK1/HSP90AA1
GO:0080009	BP	GO:0080009	mRNA methylation	4	0.804473394166741	1.46417081874055	0.0434782608695652	0.606161786448871	0.587170989818032	268	tags=50%, list=9%, signal=46%	ZC3H13/VIRMA
GO:2001242	BP	GO:2001242	regulation of intrinsic apoptotic signaling pathway	60	0.388735023776657	1.43653875785677	0.0433868705907581	0.606161786448871	0.587170989818032	752	tags=42%, list=24%, signal=32%	RPL26/TPT1/DNAJA1/MIF/S100A9/GPX1/WFS1/CXCL12/HSPB1/CD74/ENO1/PARK7/PPIA/SOD2/VDAC2/CLU/ARMC10/CD44/RPS7/DDX3X/CCAR2/SOD1/EIF5A/HDAC1/KDM1A
GO:0010544	BP	GO:0010544	negative regulation of platelet activation	6	-0.716151053673121	-1.58337657189843	0.0437719478889283	0.60729751476667	0.588271136240051	678	tags=83%, list=22%, signal=65%	CD9/TMX1/PRKCD/APOE/F2
GO:0045824	BP	GO:0045824	negative regulation of innate immune response	24	0.492289466662062	1.49383683845296	0.0438871473354232	0.607833161001603	0.58879000090125	1129	tags=67%, list=37%, signal=43%	OAS1/ISG15/SERPINB9/SERPING1/ADAR/NLRX1/TRIM21/DHX58/GIGYF2/YWHAZ/ARG1/GRN/SAMHD1/LGALS9/USP15/TTLL12
GO:0050708	BP	GO:0050708	regulation of protein secretion	55	-0.429728482553245	-1.62537975183168	0.0443440670145046	0.60846452668166	0.589401586157174	443	tags=31%, list=14%, signal=27%	CD2AP/SLC12A2/APOE/TARDBP/CHGA/SEC24A/MYO18A/F2/P3H1/LLGL2/ADRA2A/FGG/EIPR1/SLC25A22/CELA2A/FGB/FGA
GO:0006613	BP	GO:0006613	cotranslational protein targeting to membrane	6	-0.712040246039673	-1.57428776798619	0.0445331801353606	0.60846452668166	0.589401586157174	658	tags=83%, list=21%, signal=66%	SEC63/SEC61B/SRP68/SRPRB/SEC61A1
GO:0006614	BP	GO:0006614	SRP-dependent cotranslational protein targeting to membrane	6	-0.712040246039673	-1.57428776798619	0.0445331801353606	0.60846452668166	0.589401586157174	658	tags=83%, list=21%, signal=66%	SEC63/SEC61B/SRP68/SRPRB/SEC61A1
GO:0055102	MF	GO:0055102	lipase inhibitor activity	6	-0.711455969233759	-1.57299595922428	0.0445331801353606	0.60846452668166	0.589401586157174	675	tags=83%, list=22%, signal=65%	ANXA1/FAF2/ANXA4/ANXA2/APOC3
GO:0061025	BP	GO:0061025	membrane fusion	43	-0.424236784587723	-1.54197255542085	0.0444115447804179	0.60846452668166	0.589401586157174	402	tags=33%, list=13%, signal=29%	SEC22B/CHMP6/NSFL1C/TOM1/ANXA2/STX7/SEPTIN8/CHMP4C/CHMP1A/VAMP8/EEA1/PIP4K2A/CHMP4B/SNAP23
GO:0090083	BP	GO:0090083	regulation of inclusion body assembly	5	0.762540716612378	1.48540008160993	0.0447761194029851	0.60846452668166	0.589401586157174	734	tags=100%, list=24%, signal=76%	PSMC6/DNAJB1/CLU/SORL1/DNAJB6
GO:0045780	BP	GO:0045780	positive regulation of bone resorption	5	0.762364302455969	1.48505643359663	0.0447761194029851	0.60846452668166	0.589401586157174	78	tags=20%, list=3%, signal=20%	TFRC
GO:0051787	MF	GO:0051787	misfolded protein binding	8	0.664361408324449	1.48025309828418	0.0440456769983687	0.60846452668166	0.589401586157174	583	tags=62%, list=19%, signal=51%	SDF2/DERL1/BAG6/HDAC6/CLU
GO:0009161	BP	GO:0009161	ribonucleoside monophosphate metabolic process	31	0.453504846959329	1.45746196621475	0.0446595182887554	0.60846452668166	0.589401586157174	1139	tags=55%, list=37%, signal=35%	PRPS2/IMPDH2/AK4/DPYD/PNP/GART/GMPS/ATIC/PRPS1/AK3/CMPK1/ADSL/UMPS/TJP2/UPP1/NT5C/AMPD2
GO:0001221	MF	GO:0001221	transcription coregulator binding	19	0.506834109169274	1.44836871285128	0.0447284345047923	0.60846452668166	0.589401586157174	557	tags=42%, list=18%, signal=35%	UBE2I/ELOC/STAT1/ELOB/ENO1/HDAC6/TFAM/STAT6
GO:0032993	CC	GO:0032993	protein-DNA complex	167	0.303822394587996	1.31385272476333	0.0446043165467626	0.60846452668166	0.589401586157174	833	tags=36%, list=27%, signal=28%	CSNK2B/H2AC21/PRPF19/TGM2/TCF4/COPS5/PCNA/STAG2/H1-2/RAN/SRSF2/RBBP4/STAT1/H2AC18/MCM2/H1-3/MNT/SMARCD2/PARK7/RUVBL2/EXOSC4/STAT5A/H2AZ2/SSRP1/H1-10/NFKB1/H2AX/CREB1/POLD2/PDS5B/PADI2/ACTG1/TCP1/H2BC4/PDS5A/UHRF1/DMAP1/STAT6/HNRNPC/UBA1/TOP1/PRKAA1/CCAR2/MACROH2A2/SMARCC1/GTF2B/MSH6/TRRAP/SF3B1/HDAC1/MCM7/KDM1A/FOXK1/WDR76/HCFC1/H3C1/SMARCB1/RFX5/DDX21/SET
GO:0042026	BP	GO:0042026	protein refolding	13	0.574770986282752	1.505770027309	0.0453195872191296	0.608830185784245	0.589755789312174	728	tags=57%, list=24%, signal=44%	HSPB6/DNAJA1/HSPB1/CRYAB/DNAJA2/HSPA8/HSPD1/HSP90AA1
GO:0035036	BP	GO:0035036	sperm-egg recognition	12	0.58351778061413	1.47966908003717	0.0452342487883683	0.608830185784245	0.589755789312174	1054	tags=79%, list=34%, signal=52%	UBAP2L/CCT2/CCT3/TCP1/VDAC2/ALDOA/CCT5/CCT3/CCT8/CCT7/ALDOA
GO:0061635	BP	GO:0061635	regulation of protein complex stability	4	0.803537991198134	1.46246835133724	0.0451505016722408	0.608830185784245	0.589755789312174	596	tags=75%, list=19%, signal=61%	SNF8/TAPBP/HSPA8
GO:0045655	BP	GO:0045655	regulation of monocyte differentiation	4	0.802938564185009	1.46137737238511	0.0451505016722408	0.608830185784245	0.589755789312174	572	tags=75%, list=19%, signal=61%	CD74/ACIN1/INPP5D
GO:0033691	MF	GO:0033691	sialic acid binding	4	0.801778168295408	1.45926540968745	0.0451505016722408	0.608830185784245	0.589755789312174	426	tags=75%, list=14%, signal=65%	FCN1/AGRN/CD22
GO:0006228	BP	GO:0006228	UTP biosynthetic process	4	0.801389431136328	1.45855789392794	0.0451505016722408	0.608830185784245	0.589755789312174	227	tags=50%, list=7%, signal=46%	NME2/NME1
GO:0009892	BP	GO:0009892	negative regulation of metabolic process	575	0.245148856694036	1.20722511335335	0.0453400503778338	0.608830185784245	0.589755789312174	760	tags=29%, list=25%, signal=27%	S100A11/TAF15/DAP/TYMS/SRSF4/IKBKB/UBE2I/FLNA/OAS1/MAFG/DNAJA1/PTBP1/CDKN2C/HIF1AN/SARNP/MIF/PCNA/PRDX5/SPINK1/IPO5/PTRH2/ORM1/EIF4E/CHID1/ISG15/RPL11/H1-2/SERPINB10/PFDN6/DOCK7/FMR1/WNK1/RPL13A/RAN/BTAF1/SERPINB9/ELOC/GPX1/WFS1/PTPRC/SRSF2/PRKAR2B/DRAP1/RBBP4/SRSF6/RPS26/RPL10/STAT1/CSK/ETF1/TRAF6/STK38L/HNRNPD/HSPB1/ALDH1A1/AHSG/HSP90AB1/U2AF2/STRN3/CRYAB/ELOB/H1-3/PRKACA/HMGB1/MNT/ENO1/SNX3/DH…
GO:0070513	MF	GO:0070513	death domain binding	3	0.857644336148818	1.4157075172602	0.0458553791887125	0.610584377922186	0.591455023340105	8	tags=33%, list=0%, signal=33%	DAP
GO:0045657	BP	GO:0045657	positive regulation of monocyte differentiation	3	0.856993608174896	1.4146333651373	0.0458553791887125	0.610584377922186	0.591455023340105	392	tags=67%, list=13%, signal=58%	CD74/ACIN1
GO:0030511	BP	GO:0030511	positive regulation of transforming growth factor beta receptor signaling pathway	3	0.856836919741737	1.41437472063474	0.0458553791887125	0.610584377922186	0.591455023340105	386	tags=67%, list=13%, signal=58%	HSP90AB1/SNW1
GO:1903846	BP	GO:1903846	positive regulation of cellular response to transforming growth factor beta stimulus	3	0.856836919741737	1.41437472063474	0.0458553791887125	0.610584377922186	0.591455023340105	386	tags=67%, list=13%, signal=58%	HSP90AB1/SNW1
GO:0060009	BP	GO:0060009	Sertoli cell development	3	0.856609238181227	1.41399888827257	0.0458553791887125	0.610584377922186	0.591455023340105	360	tags=75%, list=12%, signal=66%	FNDC3A/FLNA/FLNA
GO:0032965	BP	GO:0032965	regulation of collagen biosynthetic process	5	-0.771044691018693	-1.58706635348667	0.0463475365715715	0.611117986628494	0.591971914307604	632	tags=80%, list=21%, signal=64%	EMILIN1/VIM/SERPINF2/F2
GO:0005518	MF	GO:0005518	collagen binding	29	-0.449305574886539	-1.51180360199734	0.0464186688814067	0.611117986628494	0.591971914307604	752	tags=40%, list=24%, signal=31%	VWF/VTN/ITGA1/PPIB/LUM/AEBP1/MMP9/P3H1/TNXB/CRTAP/AP1G1/FN1
GO:0046456	BP	GO:0046456	icosanoid biosynthetic process	13	0.574547818030315	1.50518537694635	0.0462787230649357	0.611117986628494	0.591971914307604	298	tags=38%, list=10%, signal=35%	MIF/PTGES3/CD74/LTA4H/MGST3
GO:0033572	BP	GO:0033572	transferrin transport	5	0.761226062164795	1.48283918514738	0.0464344941956882	0.611117986628494	0.591971914307604	220	tags=33%, list=7%, signal=31%	TFRC/ARHGAP1
GO:0004550	MF	GO:0004550	nucleoside diphosphate kinase activity	6	0.712843793586534	1.45387895585694	0.0461285008237232	0.611117986628494	0.591971914307604	266	tags=50%, list=9%, signal=46%	NME2/NME1/AK4
GO:0030488	BP	GO:0030488	tRNA methylation	6	0.712206746960221	1.45257966884311	0.0461285008237232	0.611117986628494	0.591971914307604	424	tags=50%, list=14%, signal=43%	HSD17B10/TRMT5/TRMT1
GO:0015872	BP	GO:0015872	dopamine transport	6	0.710740835990825	1.44958987342265	0.0461285008237232	0.611117986628494	0.591971914307604	343	tags=50%, list=11%, signal=45%	TGM2/CXCL12/PARK7
GO:0006953	BP	GO:0006953	acute-phase response	14	-0.539030177066072	-1.52912884603386	0.0466035563777	0.612327522207661	0.593143555640194	243	tags=53%, list=8%, signal=49%	SERPINF2/F2/ITIH4/CD163/ITIH4/HP/FN1/REG3G
GO:0031672	CC	GO:0031672	A band	9	0.639892080978261	1.4848734636821	0.0467741935483871	0.612541254125413	0.593350591425866	1214	tags=80%, list=39%, signal=49%	CRYAB/ENO1/ALDOA/RPL15/PPP2R5A/PPP1R12B/ALDOA/ANK1
GO:0014812	BP	GO:0014812	muscle cell migration	18	0.522108614626829	1.47487910244398	0.0466988727858293	0.612541254125413	0.593350591425866	285	tags=21%, list=9%, signal=19%	S100A11/TPM1/DOCK7/CORO1B
GO:0044331	BP	GO:0044331	cell-cell adhesion mediated by cadherin	13	-0.647994214081307	-1.79614696825812	0.0477101147092598	0.61558872305141	0.596302584418034	463	tags=62%, list=15%, signal=52%	CDH17/CDH5/AFDN/SERPINF2/FLOT1/TJP1/CDHR2/PLG
GO:0019068	BP	GO:0019068	virion assembly	13	-0.646537803220886	-1.7921100063615	0.0477101147092598	0.61558872305141	0.596302584418034	174	tags=62%, list=6%, signal=58%	CHMP6/APOE/CHMP4C/CHMP1A/RAB43/VPS37C/PC/CHMP4B
GO:0071604	BP	GO:0071604	transforming growth factor beta production	10	-0.612464735832705	-1.55638293678251	0.0478736315722007	0.61558872305141	0.596302584418034	615	tags=60%, list=20%, signal=48%	AGT/LUM/CD2AP/SERPINF2/COL3A1/FN1
GO:0002504	BP	GO:0002504	antigen processing and presentation of peptide or polysaccharide antigen via MHC class II	7	0.68779649633951	1.4853209433635	0.0477759472817133	0.61558872305141	0.596302584418034	257	tags=25%, list=8%, signal=23%	TRAF6/CD74
GO:1901071	BP	GO:1901071	glucosamine-containing compound metabolic process	7	0.685254277409392	1.47983093136196	0.0477759472817133	0.61558872305141	0.596302584418034	606	tags=57%, list=20%, signal=46%	RENBP/CHI3L1/PGM3/AMDHD2
GO:0032401	BP	GO:0032401	establishment of melanosome localization	5	0.75951850061226	1.47951292070768	0.0480928689883914	0.61558872305141	0.596302584418034	378	tags=40%, list=12%, signal=35%	BLOC1S3/RAB27A
GO:0032402	BP	GO:0032402	melanosome transport	5	0.75951850061226	1.47951292070768	0.0480928689883914	0.61558872305141	0.596302584418034	378	tags=40%, list=12%, signal=35%	BLOC1S3/RAB27A
GO:0051904	BP	GO:0051904	pigment granule transport	5	0.75951850061226	1.47951292070768	0.0480928689883914	0.61558872305141	0.596302584418034	378	tags=40%, list=12%, signal=35%	BLOC1S3/RAB27A
GO:0051905	BP	GO:0051905	establishment of pigment granule localization	5	0.75951850061226	1.47951292070768	0.0480928689883914	0.61558872305141	0.596302584418034	378	tags=40%, list=12%, signal=35%	BLOC1S3/RAB27A
GO:0002756	BP	GO:0002756	MyD88-independent toll-like receptor signaling pathway	5	0.756985305250482	1.47457835326079	0.0480928689883914	0.61558872305141	0.596302584418034	244	tags=40%, list=8%, signal=37%	IKBKB/TRAF6
GO:0009409	BP	GO:0009409	response to cold	7	0.681972689818051	1.47274422649673	0.0477759472817133	0.61558872305141	0.596302584418034	728	tags=71%, list=24%, signal=55%	ACADM/PRKACA/HSPD1/PRKAA1/HSP90AA1
GO:0007064	BP	GO:0007064	mitotic sister chromatid cohesion	8	0.657878417315493	1.46580844902112	0.0473083197389886	0.61558872305141	0.596302584418034	712	tags=50%, list=23%, signal=39%	STAG2/PDS5B/PDS5A/NAA50
GO:1900182	BP	GO:1900182	positive regulation of protein localization to nucleus	41	0.419798156463418	1.43526219621828	0.0479876160990712	0.61558872305141	0.596302584418034	887	tags=49%, list=29%, signal=35%	FLNA/TFRC/IPO5/RAN/CCT2/PARK7/MAPK14/FLNA/BAG3/CCT3/TCP1/HCLS1/DMAP1/CCT5/CDK1/CCT3/HSP90AA1/MEPCE/CCT8/IPO7/CCT6A
GO:0060445	BP	GO:0060445	branching involved in salivary gland morphogenesis	3	0.856283538710047	1.41346125842966	0.0476190476190476	0.61558872305141	0.596302584418034	400	tags=67%, list=13%, signal=58%	TGM2/DAG1
GO:2001237	BP	GO:2001237	negative regulation of extrinsic apoptotic signaling pathway	24	-0.497329058933433	-1.60201720460165	0.0483258410809545	0.616581792312628	0.597264541232376	73	tags=21%, list=2%, signal=20%	YAP1/FGG/FGB/COL2A1/FGA
GO:0008089	BP	GO:0008089	anterograde axonal transport	11	0.598392217305664	1.48097774400723	0.0483091787439614	0.616581792312628	0.597264541232376	697	tags=55%, list=23%, signal=42%	BLOC1S3/HSPB1/SPG7/AP3S1/SOD1/MAP1A
GO:0006091	BP	GO:0006091	generation of precursor metabolites and energy	189	0.292138852502712	1.2855132582585	0.0485714285714286	0.618720476954827	0.59933622177434	1094	tags=43%, list=36%, signal=30%	PRPS2/CYB5R4/ACSS3/NDUFB11/COX7A2L/NDUFS8/ATP5PO/GPI/SLC25A4/AKR1B1/ACOX1/ACADM/QDPR/NDUFA9/PYGM/IDE/AACS/PTGES3/PPP1CB/AK4/NDUFS2/PRKACA/ATP5F1C/ACSS2/ASPH/NDUFV1/PGK1/ENO1/PARK7/NDUFB5/PPP1CA/NDUFA6/COX7A2/UGP2/SOD2/PFKM/TKT/ACSS1/PYGL/ALDOA/CS/PGD/PYGB/COX5B/CDK1/ETFB/PRKAA1/AGL/COX7C/ME2/FOXK1/IDH1/NDUFS1/ATP5F1A/FH/MDH2/ADSL/PKM/FDX2/NCF1/PFKP/VCP/SLC25A12/ENO2/PFKL/ALDOC/COX4I1/CYCS/NNT/LDH…
GO:0016706	MF	GO:0016706	2-oxoglutarate-dependent dioxygenase activity	13	-0.636607227661905	-1.76458387604163	0.0493137789121521	0.624303308159685	0.60474414519978	226	tags=31%, list=7%, signal=29%	P4HA1/PHF2/P3H1/ALKBH5
GO:0000086	BP	GO:0000086	G2/M transition of mitotic cell cycle	23	-0.543456418580297	-1.7403917138686	0.0495603684652976	0.624303308159685	0.60474414519978	437	tags=40%, list=14%, signal=35%	USH1C/RRM2B/NES/BABAM1/BRD4/SIN3A/PPME1/CHMP4C/USP47/CDK4
GO:0032400	BP	GO:0032400	melanosome localization	7	0.678905059680368	1.4661195703459	0.0494233937397035	0.624303308159685	0.60474414519978	378	tags=29%, list=12%, signal=25%	BLOC1S3/RAB27A
GO:0051875	BP	GO:0051875	pigment granule localization	7	0.678905059680368	1.4661195703459	0.0494233937397035	0.624303308159685	0.60474414519978	378	tags=29%, list=12%, signal=25%	BLOC1S3/RAB27A
GO:1902106	BP	GO:1902106	negative regulation of leukocyte differentiation	16	0.529475500508879	1.46420195623985	0.0492063492063492	0.624303308159685	0.60474414519978	331	tags=31%, list=11%, signal=28%	NME2/SLC4A2/CD74/HMGB1/FGL2
GO:0010881	BP	GO:0010881	regulation of cardiac muscle contraction by regulation of the release of sequestered calcium ion	6	0.70756055465208	1.44310353777141	0.0494233937397035	0.624303308159685	0.60474414519978	656	tags=67%, list=21%, signal=53%	CLIC2/PRKACA/ATP1A2/CALM3
GO:0000122	BP	GO:0000122	negative regulation of transcription by RNA polymerase II	117	0.319835031324256	1.32053619102136	0.049490538573508	0.624303308159685	0.60474414519978	1017	tags=44%, list=33%, signal=30%	UBE2I/MAFG/SARNP/PCNA/H1-2/WFS1/DRAP1/RBBP4/RPL10/STAT1/TRAF6/H1-3/HMGB1/MNT/ENO1/COPS2/SNW1/ELANE/PPID/NFKB1/HDAC6/SAMD1/UHRF1/HCLS1/DMAP1/STAT6/DNAJB1/BIN1/SARS1/MACROH2A2/MEPCE/PHB1/HDAC1/IMPACT/KDM1A/FOXK1/HCFC1/RFX5/UBE2D3/IRF2BP2/CHD3/CUL3/HDGF/USP9X/MTDH/CC2D1B/YWHAZ/SMARCA4/DDX5/TXN/RBM10
GO:0044839	BP	GO:0044839	cell cycle G2/M phase transition	25	-0.526623123731198	-1.72403955082224	0.0509304994428295	0.625475352598331	0.605879469973686	437	tags=37%, list=14%, signal=32%	USH1C/RRM2B/NES/BABAM1/BRD4/SIN3A/PPME1/CHMP4C/USP47/CDK4
GO:0048259	BP	GO:0048259	regulation of receptor-mediated endocytosis	30	-0.449147786056987	-1.52795584757201	0.0499801813298839	0.625475352598331	0.605879469973686	797	tags=53%, list=26%, signal=40%	PICALM/PPT1/SCRIB/VTN/PLCG2/AP2A1/C3/VAC14/HIP1/FLOT1/BMP2K/ARF1/ANXA2/TBC1D5/ANKRD13A/APOC3
GO:0033233	BP	GO:0033233	regulation of protein sumoylation	5	0.755625895433771	1.47193027505501	0.0497512437810945	0.625475352598331	0.605879469973686	343	tags=40%, list=11%, signal=36%	UBE2I/PARK7
GO:0099622	BP	GO:0099622	cardiac muscle cell membrane repolarization	7	0.675738964298182	1.45928227500509	0.0510708401976936	0.625475352598331	0.605879469973686	603	tags=50%, list=20%, signal=40%	FLNA/FLNA/WDR1/SNTA1
GO:0098554	CC	GO:0098554	cytoplasmic side of endoplasmic reticulum membrane	7	0.674236369312625	1.45603736780751	0.0510708401976936	0.625475352598331	0.605879469973686	647	tags=57%, list=21%, signal=45%	DNAJA1/RPS26/RPL27/RPS29
GO:0002223	BP	GO:0002223	stimulatory C-type lectin receptor signaling pathway	7	0.673313591750801	1.45404459691388	0.0510708401976936	0.625475352598331	0.605879469973686	648	tags=43%, list=21%, signal=34%	IKBKB/TRAF6/PAK2
GO:1990840	BP	GO:1990840	response to lectin	7	0.673313591750801	1.45404459691388	0.0510708401976936	0.625475352598331	0.605879469973686	648	tags=43%, list=21%, signal=34%	IKBKB/TRAF6/PAK2
GO:1990858	BP	GO:1990858	cellular response to lectin	7	0.673313591750801	1.45404459691388	0.0510708401976936	0.625475352598331	0.605879469973686	648	tags=43%, list=21%, signal=34%	IKBKB/TRAF6/PAK2
GO:0042559	BP	GO:0042559	pteridine-containing compound biosynthetic process	7	0.673214677129491	1.45383098727874	0.0510708401976936	0.625475352598331	0.605879469973686	538	tags=57%, list=17%, signal=47%	QDPR/DHFR/GART/ATIC
GO:0030018	CC	GO:0030018	Z disc	45	0.416292818609369	1.44185081461662	0.0499667520241079	0.625475352598331	0.605879469973686	423	tags=29%, list=14%, signal=26%	FLNA/CSRP1/PDLIM7/HSPB1/CRYAB/DES/PGM5/SYNPO/FLNA/NEXN/BAG3/MYL9/PDLIM3/SYNPO2
GO:1903541	BP	GO:1903541	regulation of exosomal secretion	6	0.706130708880174	1.44018729904338	0.0510708401976936	0.625475352598331	0.605879469973686	457	tags=50%, list=15%, signal=43%	SNF8/RAB7A/VPS4B
GO:1903543	BP	GO:1903543	positive regulation of exosomal secretion	6	0.706130708880174	1.44018729904338	0.0510708401976936	0.625475352598331	0.605879469973686	457	tags=50%, list=15%, signal=43%	SNF8/RAB7A/VPS4B
GO:0000054	BP	GO:0000054	ribosomal subunit export from nucleus	6	0.703536911944827	1.43489712633795	0.0510708401976936	0.625475352598331	0.605879469973686	152	tags=33%, list=5%, signal=32%	XPO1/RAN
GO:0033750	BP	GO:0033750	ribosome localization	6	0.703536911944827	1.43489712633795	0.0510708401976936	0.625475352598331	0.605879469973686	152	tags=33%, list=5%, signal=32%	XPO1/RAN
GO:0043422	MF	GO:0043422	protein kinase B binding	3	0.852569679019779	1.40733081617061	0.0511463844797178	0.625475352598331	0.605879469973686	244	tags=33%, list=8%, signal=31%	TRAF6
GO:0030595	BP	GO:0030595	leukocyte chemotaxis	49	0.39064242866802	1.39092060507873	0.0507692307692308	0.625475352598331	0.605879469973686	653	tags=31%, list=21%, signal=25%	MIF/S100A9/WNK1/RPL13A/CXCL12/CD74/HMGB1/CORO1A/PPIA/NCKAP1L/S100A12/PADI2/RAC2/SBDS/PTK2
GO:0000785	CC	GO:0000785	chromatin	152	0.30737119402429	1.31295682089803	0.0502152080344333	0.625475352598331	0.605879469973686	869	tags=38%, list=28%, signal=29%	CSNK2B/H2AC21/TGM2/TCF4/COPS5/PCNA/STAG2/H1-2/RAN/SRSF2/RBBP4/STAT1/H2AC18/MCM2/H1-3/MNT/SMARCD2/PARK7/RUVBL2/EXOSC4/STAT5A/H2AZ2/SSRP1/H1-10/NFKB1/H2AX/CREB1/PDS5B/PADI2/ACTG1/TCP1/H2BC4/PDS5A/UHRF1/DMAP1/STAT6/HNRNPC/UBA1/PRKAA1/CCAR2/MACROH2A2/SMARCC1/MSH6/TRRAP/SF3B1/HDAC1/MCM7/KDM1A/FOXK1/WDR76/HCFC1/H3C1/SMARCB1/RFX5/DDX21/SET/PELP1/HNRNPL
GO:0065009	BP	GO:0065009	regulation of molecular function	422	0.253438063697535	1.21791880744583	0.0502577319587629	0.625475352598331	0.605879469973686	752	tags=29%, list=24%, signal=26%	DAP/CSNK2B/IKBKB/CLIC2/CRTC2/UBE2I/FLNA/TGM2/OAS1/DNAJA1/CHI3L1/STMN1/TPM1/CDKN2C/COPS5/TFRC/PCNA/IPO5/CDK7/S100A9/RPL11/SERPINB10/DOCK7/FMR1/WNK1/RAN/BTAF1/PDCD6/SERPINB9/GPX1/PTPRC/PRKAR2B/ARHGAP25/NME1/LCP2/PFN1/IDE/TRAF6/PTGES3/HNRNPD/HSPB1/CD74/AHSG/HSP90AB1/TPM2/ZFP91/PDCD5/PRKACA/PRRC1/ASPH/CCT2/HMGB1/PSME3/FNTA/DHFR/PARK7/EEF1A1/MAPK14/FLNA/AGRN/CORO1C/DOCK10/PPP2CB/CSTB/UBE2V1/ELANE/PPIA…
GO:0010605	BP	GO:0010605	negative regulation of macromolecule metabolic process	527	0.248491392052191	1.21426995228541	0.051150895140665	0.625475352598331	0.605879469973686	1005	tags=38%, list=33%, signal=31%	S100A11/TAF15/DAP/TYMS/SRSF4/IKBKB/UBE2I/FLNA/OAS1/MAFG/DNAJA1/PTBP1/HIF1AN/SARNP/MIF/PCNA/PRDX5/SPINK1/IPO5/PTRH2/ORM1/EIF4E/CHID1/ISG15/RPL11/H1-2/SERPINB10/PFDN6/FMR1/WNK1/RPL13A/RAN/BTAF1/SERPINB9/ELOC/GPX1/WFS1/PTPRC/SRSF2/PRKAR2B/DRAP1/RBBP4/SRSF6/RPS26/RPL10/STAT1/CSK/ETF1/TRAF6/HNRNPD/HSPB1/AHSG/HSP90AB1/U2AF2/STRN3/CRYAB/ELOB/H1-3/HMGB1/MNT/ENO1/SNX3/DHFR/PARK7/MAPK14/RUVBL2/FLNA/COPS2/L…
GO:0032963	BP	GO:0032963	collagen metabolic process	25	-0.507344206801845	-1.66092493662199	0.0541899839671351	0.640262864519157	0.620203695297035	410	tags=42%, list=13%, signal=37%	SERPINF2/COL5A1/PLOD3/MMP9/F2/P3H1/RCN3/TNXB/COL1A1/MMP14/COL1A2
GO:1904019	BP	GO:1904019	epithelial cell apoptotic process	25	-0.505828186195403	-1.65596184372389	0.0541899839671351	0.640262864519157	0.620203695297035	630	tags=48%, list=20%, signal=38%	PAK4/CAST/EXOC5/CDH5/PLCG1/ITGA4/YAP1/ANXA2/FGG/FGB/CASP3/FGA
GO:0007062	BP	GO:0007062	sister chromatid cohesion	14	0.560221181644903	1.49731446275264	0.0550722646096958	0.640262864519157	0.620203695297035	849	tags=50%, list=28%, signal=36%	STAG2/PDS5B/PDS5A/PPP2R1A/GTF2B/NAA50/MCMBP
GO:0090276	BP	GO:0090276	regulation of peptide hormone secretion	37	-0.422600885443483	-1.49366752206532	0.0539379706197423	0.640262864519157	0.620203695297035	333	tags=27%, list=11%, signal=24%	TARDBP/CHGA/F2/ADRA2A/FGG/EIPR1/SLC25A22/CELA2A/FGB/FGA
GO:0016208	MF	GO:0016208	AMP binding	10	0.608483528422173	1.47104979845621	0.0546623794212219	0.640262864519157	0.620203695297035	908	tags=64%, list=30%, signal=45%	CYB5R3/ACSS2/PFKM/ACSS1/PYGL/PFKP/PFKL
GO:0098586	BP	GO:0098586	cellular response to virus	15	0.535537691913589	1.46034062378914	0.054858934169279	0.640262864519157	0.620203695297035	728	tags=60%, list=24%, signal=46%	OAS1/FMR1/MAPK14/NFKB1/ADAR/DDX3X/WDFY4/EIF5A/HSP90AA1
GO:0005832	CC	GO:0005832	chaperonin-containing T-complex	8	0.651651901311123	1.45193524764082	0.0538336052202284	0.640262864519157	0.620203695297035	1022	tags=89%, list=33%, signal=60%	CCT2/CCT3/TCP1/CCT5/CCT3/CCT8/CCT6A/CCT7
GO:0000055	BP	GO:0000055	ribosomal large subunit export from nucleus	4	0.795868821712258	1.44851018411056	0.0535117056856187	0.640262864519157	0.620203695297035	152	tags=50%, list=5%, signal=48%	XPO1/RAN
GO:0000056	BP	GO:0000056	ribosomal small subunit export from nucleus	4	0.795868821712258	1.44851018411056	0.0535117056856187	0.640262864519157	0.620203695297035	152	tags=50%, list=5%, signal=48%	XPO1/RAN
GO:0010559	BP	GO:0010559	regulation of glycoprotein biosynthetic process	7	0.670615437686094	1.44821783745515	0.0543657331136738	0.640262864519157	0.620203695297035	471	tags=29%, list=15%, signal=24%	TM9SF2/GOLGA2
GO:1903018	BP	GO:1903018	regulation of glycoprotein metabolic process	7	0.670615437686094	1.44821783745515	0.0543657331136738	0.640262864519157	0.620203695297035	471	tags=29%, list=15%, signal=24%	TM9SF2/GOLGA2
GO:0043516	BP	GO:0043516	regulation of DNA damage response, signal transduction by p53 class mediator	7	0.669177228287569	1.44511197321778	0.0543657331136738	0.640262864519157	0.620203695297035	752	tags=71%, list=24%, signal=54%	RPL26/MIF/CD74/CD44/KDM1A
GO:0035631	CC	GO:0035631	CD40 receptor complex	4	0.792644144062162	1.44264115357537	0.0551839464882943	0.640262864519157	0.620203695297035	244	tags=50%, list=8%, signal=46%	IKBKB/TRAF6
GO:0032059	CC	GO:0032059	bleb	4	0.791211681961503	1.4400340204844	0.0551839464882943	0.640262864519157	0.620203695297035	182	tags=40%, list=6%, signal=38%	TPM1/PTPRC
GO:0036314	BP	GO:0036314	response to sterol	4	0.789793853134073	1.4374535204826	0.0551839464882943	0.640262864519157	0.620203695297035	573	tags=75%, list=19%, signal=61%	DAG1/GPLD1/CES1
GO:0070723	BP	GO:0070723	response to cholesterol	4	0.789793853134073	1.4374535204826	0.0551839464882943	0.640262864519157	0.620203695297035	573	tags=75%, list=19%, signal=61%	DAG1/GPLD1/CES1
GO:0016775	MF	GO:0016775	phosphotransferase activity, nitrogenous group as acceptor	4	0.789565557974538	1.43703801499407	0.0551839464882943	0.640262864519157	0.620203695297035	417	tags=75%, list=14%, signal=65%	NME2/CKB/CKM
GO:0048709	BP	GO:0048709	oligodendrocyte differentiation	19	0.500964764609632	1.43159601568798	0.0527156549520767	0.640262864519157	0.620203695297035	742	tags=42%, list=24%, signal=32%	CDKN2C/CSK/EIF2B3/DAG1/WDR1/CLU/EIF2B5/HDAC1
GO:0019882	BP	GO:0019882	antigen processing and presentation	32	0.440989241724631	1.42988487734682	0.0527950310559006	0.640262864519157	0.620203695297035	576	tags=42%, list=19%, signal=35%	IKBKB/TAP2/TAPBP/SAR1B/IDE/TRAF6/CD74/FGL2/RAB5B/RAB27A/RAB10/LNPEP/TAP1/ERAP1
GO:0032637	BP	GO:0032637	interleukin-8 production	23	0.475746688798445	1.42890227843573	0.0546021840873635	0.640262864519157	0.620203695297035	439	tags=35%, list=14%, signal=30%	CHI3L1/PTPRC/FCN1/CD74/HMGB1/PARK7/ELANE/MYD88
GO:0032677	BP	GO:0032677	regulation of interleukin-8 production	23	0.475746688798445	1.42890227843573	0.0546021840873635	0.640262864519157	0.620203695297035	439	tags=35%, list=14%, signal=30%	CHI3L1/PTPRC/FCN1/CD74/HMGB1/PARK7/ELANE/MYD88
GO:0046967	BP	GO:0046967	cytosol to endoplasmic reticulum transport	4	0.783389696632965	1.42579772286945	0.0551839464882943	0.640262864519157	0.620203695297035	575	tags=50%, list=19%, signal=41%	TAP2/TAP1
GO:0090042	BP	GO:0090042	tubulin deacetylation	4	0.78248127645718	1.42414436512986	0.0551839464882943	0.640262864519157	0.620203695297035	672	tags=100%, list=22%, signal=78%	FLNA/FNTA/FLNA/HDAC6/PRKAA1
GO:0032838	CC	GO:0032838	plasma membrane bounded cell projection cytoplasm	34	0.428277106477563	1.40755434747536	0.0545171339563863	0.640262864519157	0.620203695297035	697	tags=38%, list=23%, signal=30%	BLOC1S3/FMR1/ACTR10/HSPB1/PRKACA/SPG7/MAP2K4/HDAC6/TTLL3/AP3S1/PAFAH1B1/SOD1/MAP1A
GO:1900038	BP	GO:1900038	negative regulation of cellular response to hypoxia	3	0.851118525983616	1.40493540798636	0.0529100529100529	0.640262864519157	0.620203695297035	332	tags=67%, list=11%, signal=60%	DDAH1/ENO1
GO:0097422	CC	GO:0097422	tubular endosome	3	0.849560271158828	1.40236320762745	0.0529100529100529	0.640262864519157	0.620203695297035	145	tags=33%, list=5%, signal=32%	VPS26A
GO:0003006	BP	GO:0003006	developmental process involved in reproduction	122	-0.322301674733091	-1.40216433949932	0.0526452566056634	0.640262864519157	0.620203695297035	257	tags=11%, list=8%, signal=11%	TMED2/BAK1/GGT1/PPP1R9B/TRIP13/PRKDC/TNC/CRTAP/PLG/MMP14/NUP107/UBE2J1/CASP3/ALKBH5
GO:0098808	MF	GO:0098808	mRNA cap binding	3	0.847597873737718	1.39912389190668	0.054673721340388	0.640262864519157	0.620203695297035	120	tags=33%, list=4%, signal=32%	EIF4E
GO:1902105	BP	GO:1902105	regulation of leukocyte differentiation	51	0.388663888204836	1.39908909994866	0.0548780487804878	0.640262864519157	0.620203695297035	798	tags=39%, list=26%, signal=30%	NME2/CD101/PRXL2A/PTPRC/SLC4A2/TRAF6/CD74/HMGB1/FGL2/SMARCD2/ACIN1/PNP/NCKAP1L/CREB1/HCLS1/INPP5D/SOD1/SMARCC1/LTF/SMARCB1
GO:0008175	MF	GO:0008175	tRNA methyltransferase activity	3	0.847363735357238	1.39873740131687	0.054673721340388	0.640262864519157	0.620203695297035	424	tags=67%, list=14%, signal=58%	TRMT5/TRMT1
GO:0055057	BP	GO:0055057	neuroblast division	3	0.846293635145463	1.39697099436916	0.054673721340388	0.640262864519157	0.620203695297035	414	tags=67%, list=13%, signal=58%	DOCK7/RAB10
GO:0055059	BP	GO:0055059	asymmetric neuroblast division	3	0.846293635145463	1.39697099436916	0.054673721340388	0.640262864519157	0.620203695297035	414	tags=67%, list=13%, signal=58%	DOCK7/RAB10
GO:0006936	BP	GO:0006936	muscle contraction	71	0.348156008248085	1.32448033987855	0.0551301684532925	0.640262864519157	0.620203695297035	825	tags=39%, list=27%, signal=29%	CLIC2/FLNA/TPM1/TPM2/CRYAB/DES/PRKACA/ASPH/ENO1/FLNA/MYL9/LMOD1/SLMAP/RPS6KB1/MYLK/TMOD3/ACTA1/BIN1/SNTA1/ATP1A2/ALDOA/CALM3/SYNM/SOD1/HSP90AA1/DMPK/PPP1R12B/CNN1/TPM4
GO:0043067	BP	GO:0043067	regulation of programmed cell death	335	0.2627596952015	1.23775058300595	0.0542328042328042	0.640262864519157	0.620203695297035	742	tags=29%, list=24%, signal=25%	RPL26/NME2/TPT1/HSPB6/FLNA/TGM2/DNAJA1/RPS6/COPS5/TFRC/ALDH1A3/MIF/PRDX5/S100A9/PTRH2/CFL1/SERPINB9/NUP62/GPX1/WFS1/GPI/SLC25A4/PTPRC/CXCL12/AKR1B1/SRSF6/RPL10/NME1/STAT1/TRAF6/HSPB1/CD74/XPNPEP1/HSP90AB1/CRYAB/PDCD5/HMGB1/PSME3/MNT/ENO1/PARK7/RUVBL2/FLNA/PPP1CA/BAG6/MAP2K4/CORO1A/BAG3/PPID/PPIA/NFKB1/ASNS/SOD2/API5/NCKAP1L/CREB1/RPS6KB1/KNG1/VDAC2/UTP11/GPLD1/HCLS1/GLO1/DMAP1/INPP5D/CLU/ARMC10/B…
GO:0030554	MF	GO:0030554	adenyl nucleotide binding	450	0.248351974423832	1.20160619070664	0.0535714285714286	0.640262864519157	0.620203695297035	843	tags=32%, list=27%, signal=27%	NME2/IKBKB/UBE2I/OAS1/DNAJA1/DQX1/ALDH1A3/AFG2A/PRPS2/CDK7/DDX18/ACSS3/WNK1/TAP2/BTAF1/LDHB/PSMC3/PRKAR2B/CYB5R3/ACSL1/PSMC1/BCS1L/CUL9/QDPR/NME1/PFN1/CSK/TP53RK/IDE/AACS/STK38L/ALDH1A1/MCM2/AK4/HSP90AB1/NDUFS2/DNAJA2/NUBP2/SELENOO/PRKACA/ACSS2/ACSL4/CCT2/DPYD/NDUFV1/PGK1/PEBP1/DHFR/TEP1/CKB/ACADL/MAPK14/RUVBL2/SPG7/ILK/MAP2K4/GSS/FCSK/BAG3/DDX54/CKM/BDH2/CCT3/GART/ASNS/VPS4B/SLFN11/GMPS/PFKM/RPS…
GO:0071868	BP	GO:0071868	cellular response to monoamine stimulus	16	0.527873553420779	1.45977196078598	0.0555555555555556	0.640826873385013	0.620750033999728	360	tags=29%, list=12%, signal=26%	FLNA/TGM2/SULT1A3/GNB1/FLNA
GO:0071870	BP	GO:0071870	cellular response to catecholamine stimulus	16	0.527873553420779	1.45977196078598	0.0555555555555556	0.640826873385013	0.620750033999728	360	tags=29%, list=12%, signal=26%	FLNA/TGM2/SULT1A3/GNB1/FLNA
GO:1903351	BP	GO:1903351	cellular response to dopamine	16	0.527873553420779	1.45977196078598	0.0555555555555556	0.640826873385013	0.620750033999728	360	tags=29%, list=12%, signal=26%	FLNA/TGM2/SULT1A3/GNB1/FLNA
GO:0000381	BP	GO:0000381	regulation of alternative mRNA splicing, via spliceosome	22	0.479064423343973	1.43079472412848	0.0555555555555556	0.640826873385013	0.620750033999728	1063	tags=59%, list=35%, signal=39%	PTBP1/FMR1/SRSF2/SRSF6/RBM8A/PUF60/RBM25/SMU1/HNRNPL/THRAP3/DDX17/DDX5/HNRNPU
GO:0070482	BP	GO:0070482	response to oxygen levels	76	-0.371587242743051	-1.49035852734601	0.0557319798914885	0.6419288714352	0.621817506909389	187	tags=12%, list=6%, signal=11%	ACAA2/CAV1/CLCA1/ADO/COL1A1/MMP14/XRCC1/CASP3/ALKBH5
GO:0030894	CC	GO:0030894	replisome	7	0.663463291427692	1.43277252378441	0.0560131795716639	0.642370799249602	0.62224558930919	478	tags=43%, list=16%, signal=36%	PRPF19/PCNA/POLD2
GO:0046578	BP	GO:0046578	regulation of Ras protein signal transduction	6	0.699165527777195	1.42598147959112	0.0560131795716639	0.642370799249602	0.62224558930919	380	tags=33%, list=12%, signal=29%	NUP62/PPP2CB
GO:0008090	BP	GO:0008090	retrograde axonal transport	6	0.697412407787443	1.4224059076592	0.0560131795716639	0.642370799249602	0.62224558930919	697	tags=67%, list=23%, signal=52%	ACTR10/PAFAH1B1/SOD1/MAP1A
GO:0043546	MF	GO:0043546	molybdopterin cofactor binding	3	-0.856192791491688	-1.53072914081274	0.0574712643678161	0.642677824267783	0.622542995361261	346	tags=100%, list=11%, signal=89%	MTARC2/GPHN
GO:0045742	BP	GO:0045742	positive regulation of epidermal growth factor receptor signaling pathway	11	-0.580523199223686	-1.52888884183741	0.0564292472900625	0.642677824267783	0.622542995361261	369	tags=45%, list=12%, signal=40%	AGT/HIP1/MMP9/ADRA2A/RALB
GO:0017171	MF	GO:0017171	serine hydrolase activity	36	-0.437350997879565	-1.5260912478789	0.0574600692065312	0.642677824267783	0.622542995361261	494	tags=28%, list=16%, signal=24%	CPD/C2/MMP9/DPP7/F2/PLG/MMP14/HP/CELA2A/CFD
GO:0007492	BP	GO:0007492	endoderm development	24	-0.473729488898024	-1.52599728069251	0.0574125476280753	0.642677824267783	0.622542995361261	401	tags=33%, list=13%, signal=29%	CDC73/ITGA4/COL5A1/MMP9/COL5A2/MMP14/COL4A2/FN1
GO:1901989	BP	GO:1901989	positive regulation of cell cycle phase transition	22	-0.485415763377151	-1.52151479201969	0.0564861697284544	0.642677824267783	0.622542995361261	407	tags=36%, list=13%, signal=32%	RRM2B/CDC73/BRD4/SIN3A/EIF4G1/RRM2/DDRGK1/CDK4
GO:0070200	BP	GO:0070200	establishment of protein localization to telomere	9	0.628507542892241	1.45845557384923	0.0580645161290323	0.642677824267783	0.622542995361261	1022	tags=80%, list=33%, signal=54%	CCT2/CCT3/TCP1/CCT5/CCT3/CCT8/CCT6A/CCT7
GO:0070202	BP	GO:0070202	regulation of establishment of protein localization to chromosome	9	0.628507542892241	1.45845557384923	0.0580645161290323	0.642677824267783	0.622542995361261	1022	tags=80%, list=33%, signal=54%	CCT2/CCT3/TCP1/CCT5/CCT3/CCT8/CCT6A/CCT7
GO:0070203	BP	GO:0070203	regulation of establishment of protein localization to telomere	9	0.628507542892241	1.45845557384923	0.0580645161290323	0.642677824267783	0.622542995361261	1022	tags=80%, list=33%, signal=54%	CCT2/CCT3/TCP1/CCT5/CCT3/CCT8/CCT6A/CCT7
GO:1904814	BP	GO:1904814	regulation of protein localization to chromosome, telomeric region	9	0.628507542892241	1.45845557384923	0.0580645161290323	0.642677824267783	0.622542995361261	1022	tags=80%, list=33%, signal=54%	CCT2/CCT3/TCP1/CCT5/CCT3/CCT8/CCT6A/CCT7
GO:1904816	BP	GO:1904816	positive regulation of protein localization to chromosome, telomeric region	9	0.628507542892241	1.45845557384923	0.0580645161290323	0.642677824267783	0.622542995361261	1022	tags=80%, list=33%, signal=54%	CCT2/CCT3/TCP1/CCT5/CCT3/CCT8/CCT6A/CCT7
GO:1904851	BP	GO:1904851	positive regulation of establishment of protein localization to telomere	9	0.628507542892241	1.45845557384923	0.0580645161290323	0.642677824267783	0.622542995361261	1022	tags=80%, list=33%, signal=54%	CCT2/CCT3/TCP1/CCT5/CCT3/CCT8/CCT6A/CCT7
GO:0016605	CC	GO:0016605	PML body	15	0.534135092965326	1.45651592152455	0.0564263322884013	0.642677824267783	0.622542995361261	1131	tags=60%, list=37%, signal=38%	CSNK2B/UBE2I/PARK7/SUMO3/TDP2/CHD3/LRCH4/MTOR/USP7
GO:0097401	BP	GO:0097401	synaptic vesicle lumen acidification	9	0.626987447810249	1.45492818397112	0.0580645161290323	0.642677824267783	0.622542995361261	779	tags=67%, list=25%, signal=50%	ATP6V0D1/ATP6V1D/ATP6V1E1/ATP6V1F/ATP6V1B2/ATP6AP1
GO:0090646	BP	GO:0090646	mitochondrial tRNA processing	5	0.744922296291632	1.45108007428162	0.0580431177446103	0.642677824267783	0.622542995361261	307	tags=60%, list=10%, signal=54%	PUS1/HSD17B10/TRMT5
GO:0070296	BP	GO:0070296	sarcoplasmic reticulum calcium ion transport	8	0.649846126159261	1.44791182871574	0.0570962479608483	0.642677824267783	0.622542995361261	656	tags=50%, list=21%, signal=39%	CLIC2/PRKACA/ATP1A2/CALM3
GO:0006400	BP	GO:0006400	tRNA modification	17	0.518046736444439	1.44584440310086	0.0574162679425837	0.642677824267783	0.622542995361261	805	tags=41%, list=26%, signal=31%	PUS1/HSD17B10/TRMT5/TRMT1/SSB/SARS1/QNG1
GO:0010880	BP	GO:0010880	regulation of release of sequestered calcium ion into cytosol by sarcoplasmic reticulum	7	0.66015798211833	1.42563459102723	0.057660626029654	0.642677824267783	0.622542995361261	656	tags=57%, list=21%, signal=45%	CLIC2/PRKACA/ATP1A2/CALM3
GO:0014808	BP	GO:0014808	release of sequestered calcium ion into cytosol by sarcoplasmic reticulum	7	0.66015798211833	1.42563459102723	0.057660626029654	0.642677824267783	0.622542995361261	656	tags=57%, list=21%, signal=45%	CLIC2/PRKACA/ATP1A2/CALM3
GO:1903514	BP	GO:1903514	release of sequestered calcium ion into cytosol by endoplasmic reticulum	7	0.66015798211833	1.42563459102723	0.057660626029654	0.642677824267783	0.622542995361261	656	tags=57%, list=21%, signal=45%	CLIC2/PRKACA/ATP1A2/CALM3
GO:0090311	BP	GO:0090311	regulation of protein deacetylation	4	0.779225008140671	1.41821783843353	0.0568561872909699	0.642677824267783	0.622542995361261	682	tags=100%, list=22%, signal=78%	FNTA/HDAC6/PRKAA1/CCAR2
GO:0032944	BP	GO:0032944	regulation of mononuclear cell proliferation	40	0.414434269275806	1.41169530466993	0.0568356374807988	0.642677824267783	0.622542995361261	572	tags=35%, list=19%, signal=29%	TFRC/MIF/PTPRC/SLC4A2/TRAF6/CD74/HMGB1/CORO1A/PNP/CD22/MYD88/NCKAP1L/RAC2/INPP5D
GO:0050670	BP	GO:0050670	regulation of lymphocyte proliferation	40	0.414434269275806	1.41169530466993	0.0568356374807988	0.642677824267783	0.622542995361261	572	tags=35%, list=19%, signal=29%	TFRC/MIF/PTPRC/SLC4A2/TRAF6/CD74/HMGB1/CORO1A/PNP/CD22/MYD88/NCKAP1L/RAC2/INPP5D
GO:0030157	BP	GO:0030157	pancreatic juice secretion	3	0.845585331256485	1.39580180208529	0.0564373897707231	0.642677824267783	0.622542995361261	147	tags=67%, list=5%, signal=64%	SPINK1/WNK1
GO:0001779	BP	GO:0001779	natural killer cell differentiation	3	0.84511183645301	1.39502020751933	0.0564373897707231	0.642677824267783	0.622542995361261	182	tags=33%, list=6%, signal=31%	PTPRC
GO:0044281	BP	GO:0044281	small molecule metabolic process	496	0.244637054044454	1.19010272358532	0.0579150579150579	0.642677824267783	0.622542995361261	795	tags=28%, list=26%, signal=25%	ASMTL/NME2/TYMS/CRTC2/RENBP/OAS1/UGGT1/NT5C3A/ABHD10/FDPS/ALDH1A3/MIF/PRPS2/ACADSB/EPHX2/ACSS3/NDUFB11/ECHS1/NDUFS8/RAN/NPC1L1/OSBP/ATP5PO/GPX1/LDHB/GPI/RDH11/PRKAR2B/HSD17B10/AKR1B1/ACOX1/CYB5R3/ACSL1/SULT1A3/ERH/ACADM/QDPR/NME1/NUDT18/NDUFA9/SLC25A11/AACS/PTGES3/NUDT4/IMPDH2/CD74/ALDH1A1/AK4/DCTPP1/LTA4H/COQ6/NDUFS2/GOT1/MGST3/PRKACA/ATP5F1C/ACSS2/ACSL4/DDAH1/DPYD/PGM3/NDUFV1/PGK1/ENO1/DHFR/PAR…
GO:0099623	BP	GO:0099623	regulation of cardiac muscle cell membrane repolarization	4	0.777787754870096	1.41560198523916	0.0585284280936455	0.646185806587912	0.625941074054478	603	tags=80%, list=20%, signal=64%	FLNA/FLNA/WDR1/SNTA1
GO:0016741	MF	GO:0016741	transferase activity, transferring one-carbon groups	30	0.44434161459804	1.41106567817368	0.0585443037974684	0.646185806587912	0.625941074054478	590	tags=30%, list=19%, signal=24%	ASMTL/TYMS/MRM1/FBL/TRMT5/TRMT1/GART/ATIC/MGMT
GO:0007160	BP	GO:0007160	cell-matrix adhesion	69	-0.385565450611095	-1.50161086854133	0.0591743199839175	0.652232504711624	0.631798331641154	173	tags=14%, list=6%, signal=14%	TNXB/ITGB4/EFEMP2/MMP14/FGG/S100A10/COL3A1/FGB/FN1/FGA
GO:1902774	BP	GO:1902774	late endosome to lysosome transport	10	-0.592615814395427	-1.5059432611063	0.0597428836332103	0.654921991730081	0.63440355815004	174	tags=40%, list=6%, signal=38%	CHMP6/CHMP4C/CHMP1A/CHMP4B
GO:0035767	BP	GO:0035767	endothelial cell chemotaxis	5	0.743071778587298	1.44747533673888	0.0597014925373134	0.654921991730081	0.63440355815004	285	tags=40%, list=9%, signal=36%	HSPB1/CORO1B
GO:0016846	MF	GO:0016846	carbon-sulfur lyase activity	5	0.742292249124933	1.44595684323186	0.0597014925373134	0.654921991730081	0.63440355815004	629	tags=60%, list=20%, signal=48%	MGST3/GLO1/SCLY
GO:0072527	BP	GO:0072527	pyrimidine-containing compound metabolic process	29	0.448869027985164	1.41725204741242	0.059748427672956	0.654921991730081	0.63440355815004	317	tags=24%, list=10%, signal=22%	NME2/TYMS/NT5C3A/ERH/NME1/DCTPP1/DPYD
GO:1903333	BP	GO:1903333	negative regulation of protein folding	3	0.842235441183747	1.39027216193252	0.0599647266313933	0.656386304202396	0.635821994321692	297	tags=33%, list=10%, signal=30%	PDCD5
GO:0006611	BP	GO:0006611	protein export from nucleus	22	0.475509101957776	1.42017624604061	0.0601851851851852	0.657892051831446	0.637280567503853	543	tags=32%, list=18%, signal=26%	NUTF2/XPO1/RAN/PRKACA/PARK7/BAG3/XPO5
GO:0018205	BP	GO:0018205	peptidyl-lysine modification	23	0.473334280580417	1.4216566250651	0.0608424336973479	0.661755127705272	0.641022614817434	511	tags=26%, list=17%, signal=22%	PLOD1/UBE2I/PARK7/BAG6/HDAC6/SUMO3
GO:0098576	CC	GO:0098576	lumenal side of membrane	7	0.657256750609882	1.41936927862164	0.0609555189456343	0.661755127705272	0.641022614817434	596	tags=57%, list=19%, signal=46%	TAPBP/CD74/CANX/HSPA8
GO:0001911	BP	GO:0001911	negative regulation of leukocyte mediated cytotoxicity	7	0.656489900863836	1.41771323937997	0.0609555189456343	0.661755127705272	0.641022614817434	466	tags=43%, list=15%, signal=36%	SERPINB9/PTPRC/NCKAP1L
GO:0031342	BP	GO:0031342	negative regulation of cell killing	7	0.656489900863836	1.41771323937997	0.0609555189456343	0.661755127705272	0.641022614817434	466	tags=43%, list=15%, signal=36%	SERPINB9/PTPRC/NCKAP1L
GO:0043414	BP	GO:0043414	macromolecule methylation	34	0.425090961263025	1.39708292026017	0.0607476635514019	0.661755127705272	0.641022614817434	832	tags=41%, list=27%, signal=30%	ZC3H13/MRM1/FBL/HSD17B10/ETF1/VIRMA/TRMT5/TRMT1/SNRPG/MGMT/MEPCE/NOP2/SNRPD2/SMCHD1
GO:1905918	BP	GO:1905918	regulation of CoA-transferase activity	4	-0.801367632692934	-1.55753758199486	0.0618811881188119	0.663417570199711	0.642632973680031	615	tags=100%, list=20%, signal=80%	APOE/APOA1/APOA4
GO:1905920	BP	GO:1905920	positive regulation of CoA-transferase activity	4	-0.801367632692934	-1.55753758199486	0.0618811881188119	0.663417570199711	0.642632973680031	615	tags=100%, list=20%, signal=80%	APOE/APOA1/APOA4
GO:0071875	BP	GO:0071875	adrenergic receptor signaling pathway	4	-0.800206869900157	-1.55528152422589	0.0618811881188119	0.663417570199711	0.642632973680031	303	tags=100%, list=10%, signal=90%	GNAI2/CHGA/ADRA2A
GO:0071880	BP	GO:0071880	adenylate cyclase-activating adrenergic receptor signaling pathway	4	-0.800206869900157	-1.55528152422589	0.0618811881188119	0.663417570199711	0.642632973680031	303	tags=100%, list=10%, signal=90%	GNAI2/CHGA/ADRA2A
GO:0030121	CC	GO:0030121	AP-1 adaptor complex	4	-0.795621879778628	-1.54637014056624	0.0618811881188119	0.663417570199711	0.642632973680031	587	tags=75%, list=19%, signal=61%	AP1M2/AP1M1/AP1G1
GO:0044342	BP	GO:0044342	type B pancreatic cell proliferation	3	-0.850613226780566	-1.52075381471652	0.0620689655172414	0.663417570199711	0.642632973680031	3	tags=67%, list=0%, signal=67%	WDR13/CDK4
GO:0044217	CC	GO:0044217	other organism part	3	-0.850407084138951	-1.52038526624027	0.0620689655172414	0.663417570199711	0.642632973680031	195	tags=67%, list=6%, signal=62%	CFH/C9
GO:0071709	BP	GO:0071709	membrane assembly	21	-0.483880178072384	-1.49604370167309	0.0617344116558137	0.663417570199711	0.642632973680031	402	tags=43%, list=13%, signal=38%	CHMP6/NSFL1C/FLOT1/ANXA2/CAV1/CHMP4C/CHMP1A/S100A10/CHMP4B
GO:0042288	MF	GO:0042288	MHC class I protein binding	9	0.623350559432265	1.44648876238211	0.0612903225806452	0.663417570199711	0.642632973680031	1077	tags=78%, list=35%, signal=51%	TAPBP/DERL1/TUBB/TAP1/ATP5F1A/VCP/BCAP31
GO:0055001	BP	GO:0055001	muscle cell development	47	0.393341834252076	1.38354103801144	0.062111801242236	0.663417570199711	0.642632973680031	1124	tags=47%, list=37%, signal=30%	TPM1/CSRP1/GPX1/PGM5/MAP2K4/MYL9/LMOD1/ACTG1/TMOD3/ACTA1/WDR1/BIN1/CDK1/KDM1A/FLNC/ACTN4/AFG3L2/TOMM70/CFL2/PRKAR1A/HNRNPU/PARP2/MTOR
GO:0016874	MF	GO:0016874	ligase activity	75	0.343054698913009	1.32479122164043	0.0614439324116743	0.663417570199711	0.642632973680031	778	tags=32%, list=25%, signal=24%	ACSS3/ATP5PO/ACSL1/AACS/ATP5F1C/ACSS2/ACSL4/GSS/GART/ASNS/GMPS/NARS1/ACSS1/TARS1/YARS2/PPCS/RTCB/TTLL3/UBA1/MARS1/SARS1/HARS1/ATP5F1A/KARS1
GO:0007005	BP	GO:0007005	mitochondrion organization	130	0.308207635161016	1.2895167526089	0.062049062049062	0.663417570199711	0.642632973680031	761	tags=32%, list=25%, signal=25%	TFRC/INF2/TOMM40/NDUFB11/COX7A2L/NDUFS8/GPX1/SLC25A4/HSD17B10/BCS1L/NDUFA9/NDUFS2/PDCD5/DNAJC11/PARK7/NDUFB5/SPG7/PPP2CB/NDUFA6/TIMM8B/COX7A2/DDHD2/HDAC6/SOD2/TFAM/WDR81/VDAC2/TOMM7/CLU/HSPD1/HTT/CCAR2/VAT1/TIMM9/TIMM8A/SAMM50/HSP90AA1/POLDIP2/PHB1/DCN/RAB32/NDUFS1
GO:0005940	CC	GO:0005940	septin ring	7	-0.679168651510392	-1.56549892460114	0.0632911392405063	0.668742370061472	0.647790949777022	478	tags=71%, list=16%, signal=60%	SEPTIN7/SEPTIN6/SEPTIN1/SEPTIN8/SEPTIN11
GO:0031105	CC	GO:0031105	septin complex	7	-0.679168651510392	-1.56549892460114	0.0632911392405063	0.668742370061472	0.647790949777022	478	tags=71%, list=16%, signal=60%	SEPTIN7/SEPTIN6/SEPTIN1/SEPTIN8/SEPTIN11
GO:0032156	CC	GO:0032156	septin cytoskeleton	7	-0.679168651510392	-1.56549892460114	0.0632911392405063	0.668742370061472	0.647790949777022	478	tags=71%, list=16%, signal=60%	SEPTIN7/SEPTIN6/SEPTIN1/SEPTIN8/SEPTIN11
GO:0072378	BP	GO:0072378	blood coagulation, fibrin clot formation	6	-0.701695976259108	-1.55141707005181	0.0632911392405063	0.668742370061472	0.647790949777022	135	tags=50%, list=4%, signal=48%	FBLN1/FGG/FGB/FGA
GO:0008091	CC	GO:0008091	spectrin	6	-0.700867654198659	-1.54958568861661	0.0632911392405063	0.668742370061472	0.647790949777022	619	tags=67%, list=20%, signal=53%	SPTBN1/EPB41L2/SPTB/SPTA1
GO:0017025	MF	GO:0017025	TBP-class protein binding	8	0.644287519473623	1.43552678547653	0.0636215334420881	0.668742370061472	0.647790949777022	705	tags=50%, list=23%, signal=39%	BTAF1/DRAP1/RUVBL2/GTF2B
GO:0051220	BP	GO:0051220	cytoplasmic sequestering of protein	5	0.735936390791248	1.43357587486928	0.0630182421227197	0.668742370061472	0.647790949777022	360	tags=33%, list=12%, signal=29%	FLNA/FLNA
GO:0021675	BP	GO:0021675	nerve development	8	0.642859501212893	1.43234504067865	0.0636215334420881	0.668742370061472	0.647790949777022	400	tags=50%, list=13%, signal=44%	RPL24/TCIRG1/ILK/DAG1
GO:0090023	BP	GO:0090023	positive regulation of neutrophil chemotaxis	5	0.732833638751155	1.42753183284875	0.0630182421227197	0.668742370061472	0.647790949777022	496	tags=60%, list=16%, signal=50%	CD74/NCKAP1L/RAC2
GO:1902624	BP	GO:1902624	positive regulation of neutrophil migration	5	0.732833638751155	1.42753183284875	0.0630182421227197	0.668742370061472	0.647790949777022	496	tags=60%, list=16%, signal=50%	CD74/NCKAP1L/RAC2
GO:0046639	BP	GO:0046639	negative regulation of alpha-beta T cell differentiation	4	0.774369595099012	1.40938081021099	0.0635451505016722	0.668742370061472	0.647790949777022	319	tags=50%, list=10%, signal=45%	SLC4A2/HMGB1
GO:0098556	CC	GO:0098556	cytoplasmic side of rough endoplasmic reticulum membrane	4	0.77238227494317	1.40576381529136	0.0635451505016722	0.668742370061472	0.647790949777022	647	tags=75%, list=21%, signal=59%	RPS26/RPL27/RPS29
GO:0033499	BP	GO:0033499	galactose catabolic process via UDP-galactose	4	-0.792439700764027	-1.54018525961313	0.0643564356435644	0.669954814350506	0.648965408690809	350	tags=50%, list=11%, signal=44%	GALE/GALT
GO:0046596	BP	GO:0046596	regulation of viral entry into host cell	11	0.583130498033523	1.44320608534647	0.0644122383252818	0.669954814350506	0.648965408690809	1086	tags=73%, list=35%, signal=47%	FCN1/CD74/HMGB1/SNX3/TRIM21/P4HB/TRIM25/LGALS9
GO:0032731	BP	GO:0032731	positive regulation of interleukin-1 beta production	11	0.58307530002838	1.44306947424965	0.0644122383252818	0.669954814350506	0.648965408690809	439	tags=36%, list=14%, signal=31%	ORM1/GSDMD/HSPB1/MYD88
GO:0030521	BP	GO:0030521	androgen receptor signaling pathway	18	0.505538864287017	1.4280720247129	0.0644122383252818	0.669954814350506	0.648965408690809	992	tags=50%, list=32%, signal=34%	DNAJA1/PARK7/HDAC6/PHB1/HDAC1/KDM1A/DDX17/SMARCA4/DDX5
GO:0004712	MF	GO:0004712	protein serine/threonine/tyrosine kinase activity	7	0.654204122784775	1.41277702049724	0.0642504118616145	0.669954814350506	0.648965408690809	843	tags=71%, list=27%, signal=52%	PRKACA/MAPK14/MAP2K4/RPS6KB1/MAPKAPK3
GO:0016530	MF	GO:0016530	metallochaperone activity	6	0.689660251877774	1.40659501551005	0.0642504118616145	0.669954814350506	0.648965408690809	419	tags=50%, list=14%, signal=43%	NUBP2/PARK7/ATOX1
GO:0005884	CC	GO:0005884	actin filament	51	0.385115363652814	1.3863153327624	0.0640243902439024	0.669954814350506	0.648965408690809	529	tags=28%, list=17%, signal=23%	FLNA/TPM1/INF2/PDLIM7/TPM2/CORO1B/COTL1/FLNA/DIAPH1/CORO1A/PDLIM3/LMOD1/ACTG1/RAC2/ACTA1
GO:0060326	BP	GO:0060326	cell chemotaxis	61	0.359447695288249	1.33571051064074	0.0640243902439024	0.669954814350506	0.648965408690809	496	tags=25%, list=16%, signal=21%	MIF/S100A9/WNK1/RPL13A/CXCL12/HSPB1/CD74/CORO1B/HMGB1/CORO1A/PPIA/NCKAP1L/S100A12/PADI2/RAC2
GO:0035330	BP	GO:0035330	regulation of hippo signaling	5	0.731646798045838	1.425219912656	0.0646766169154229	0.671824125446068	0.650776155047304	368	tags=40%, list=12%, signal=35%	MAPK14/LIMD1
GO:0048562	BP	GO:0048562	embryonic organ morphogenesis	25	-0.476938236719833	-1.5613829821573	0.0647833313760715	0.672052964445102	0.650997824615686	668	tags=52%, list=22%, signal=41%	PRKRA/MFAP2/EIF4A3/FBN1/USH1C/MYO6/YAP1/HMX2/TMED2/PTK7/NHERF1/MMP14/COL2A1
GO:1903136	MF	GO:1903136	cuprous ion binding	3	0.838501534388824	1.38410862805779	0.0652557319223986	0.675188381403071	0.654035010264567	419	tags=67%, list=14%, signal=58%	PARK7/ATOX1
GO:0009205	BP	GO:0009205	purine ribonucleoside triphosphate metabolic process	94	0.329010417678783	1.31539723215776	0.0652503793626707	0.675188381403071	0.654035010264567	993	tags=39%, list=32%, signal=27%	NME2/NDUFB11/NDUFS8/RAN/ATP5PO/GPI/NME1/NDUFA9/IMPDH2/AK4/NDUFS2/PRKACA/ATP5F1C/NDUFV1/PGK1/ENO1/NDUFB5/NDUFA6/PFKM/HSPA8/ATP1A2/ALDOA/PRKAA1/AK3/ATP6V1B2/FOXK1/NDUFS1/ATP5F1A/PKM/PFKP/VCP/ENO2/PFKL/ALDOC/LDHA/GAPDH/GIT1
GO:1903707	BP	GO:1903707	negative regulation of hemopoiesis	17	0.511967315154743	1.42887702037758	0.0653907496012759	0.675704412546518	0.654534874366938	331	tags=29%, list=11%, signal=26%	NME2/SLC4A2/CD74/HMGB1/FGL2
GO:0032784	BP	GO:0032784	regulation of DNA-templated transcription elongation	18	-0.515405993415843	-1.53669803036364	0.0656167979002625	0.677158528135869	0.655943433119727	821	tags=61%, list=27%, signal=45%	HEXIM1/CCNK/INTS11/TCERG1/SUPT5H/ZC3H4/CDC73/SUPT16H/BRD4/ZNF326/SUPT6H
GO:0004520	MF	GO:0004520	DNA endonuclease activity	7	-0.671263909348498	-1.54727831720682	0.0658227848101266	0.677522205257023	0.656295716387951	56	tags=71%, list=2%, signal=70%	FEN1/RAD50/ERCC4/EXOG/XRCC1
GO:0072376	BP	GO:0072376	protein activation cascade	7	-0.670237772899155	-1.54491304975173	0.0658227848101266	0.677522205257023	0.656295716387951	135	tags=44%, list=4%, signal=43%	FBLN1/FGG/FGB/FGA
GO:0008627	BP	GO:0008627	intrinsic apoptotic signaling pathway in response to osmotic stress	3	-0.847483410407451	-1.5151582278635	0.0666666666666667	0.680909480909481	0.659576870103186	18	tags=67%, list=1%, signal=66%	ARHGEF2/CASP3
GO:0030903	BP	GO:0030903	notochord development	3	-0.847141813772171	-1.51454751036013	0.0666666666666667	0.680909480909481	0.659576870103186	320	tags=67%, list=10%, signal=60%	YAP1/COL2A1
GO:0061909	BP	GO:0061909	autophagosome-lysosome fusion	3	-0.846916412517014	-1.51414453071224	0.0666666666666667	0.680909480909481	0.659576870103186	398	tags=67%, list=13%, signal=58%	TOM1/PIP4K2A
GO:0008625	BP	GO:0008625	extrinsic apoptotic signaling pathway via death domain receptors	19	-0.489473100410091	-1.49086626720012	0.0664893617021277	0.680909480909481	0.659576870103186	73	tags=16%, list=2%, signal=16%	FGG/FGB/FGA
GO:0001819	BP	GO:0001819	positive regulation of cytokine production	95	0.327604056195666	1.31330166399087	0.0664652567975831	0.680909480909481	0.659576870103186	1086	tags=43%, list=35%, signal=29%	OAS1/CHI3L1/MIF/ORM1/ISG15/GSDMD/PTPRC/FCN1/STAT1/TRAF6/HSPB1/CD74/HMGB1/PARK7/MAPK14/ELANE/PNP/MYD88/EPX/CLU/OAS2/HSPD1/DDX3X/RIGI/SOD1/SORL1/HSP90AA1/PHB1/DHX58/DDX21/RFTN1/TRIM56/AKAP12/C5/GAPDH/G3BP1/TOMM70/DDT/DDX1/DHX9/LGALS9
GO:0009141	BP	GO:0009141	nucleoside triphosphate metabolic process	105	0.319020255346626	1.29694748872146	0.0664697193500739	0.680909480909481	0.659576870103186	1061	tags=41%, list=35%, signal=28%	NME2/TYMS/NDUFB11/NDUFS8/RAN/ATP5PO/GPI/NME1/NDUFA9/IMPDH2/AK4/DCTPP1/NDUFS2/PRKACA/ATP5F1C/NDUFV1/PGK1/ENO1/NDUFB5/NDUFA6/PFKM/HSPA8/ATP1A2/ALDOA/PRKAA1/DUT/AK3/ATP6V1B2/FOXK1/NDUFS1/ATP5F1A/PKM/PFKP/VCP/ENO2/PFKL/ALDOC/LDHA/GAPDH/GIT1/NDUFS3/ALDOA/SAMHD1
GO:0032760	BP	GO:0032760	positive regulation of tumor necrosis factor production	31	0.433787497381743	1.39409486600276	0.0668740279937792	0.681006352367855	0.659670706619063	669	tags=32%, list=22%, signal=25%	OAS1/MIF/ORM1/PTPRC/HSPB1/HMGB1/MYD88/CLU/OAS2/RIGI
GO:1903557	BP	GO:1903557	positive regulation of tumor necrosis factor superfamily cytokine production	31	0.433787497381743	1.39409486600276	0.0668740279937792	0.681006352367855	0.659670706619063	669	tags=32%, list=22%, signal=25%	OAS1/MIF/ORM1/PTPRC/HSPB1/HMGB1/MYD88/CLU/OAS2/RIGI
GO:0003720	MF	GO:0003720	telomerase activity	3	0.836680730261753	1.38110303939883	0.0670194003527337	0.681006352367855	0.659670706619063	336	tags=67%, list=11%, signal=59%	PTGES3/TEP1
GO:0003964	MF	GO:0003964	RNA-directed DNA polymerase activity	3	0.836680730261753	1.38110303939883	0.0670194003527337	0.681006352367855	0.659670706619063	336	tags=67%, list=11%, signal=59%	PTGES3/TEP1
GO:0016192	BP	GO:0016192	vesicle-mediated transport	438	-0.230958397031552	-1.19120519786987	0.0674238140894466	0.684239627383437	0.662802684473318	560	tags=22%, list=18%, signal=21%	RAB14/EXOC5/PLIN3/ACTR1A/AP1M1/SEC16A/M6PR/SEC22B/CHMP6/ESYT2/APOBR/COG3/GDI1/UBE2O/RHOB/SNX2/WAS/AP3D1/SEPTIN1/RAB5C/RAB2A/VTA1/WDR44/EXOC2/PITPNB/VAC14/MICALL2/LMAN1/PRKCD/C2/BICD2/MYO6/EEF2K/TOM1/LAMP1/ITGA4/DBNL/NCF2/APOE/HIP1/CYFIP1/FLOT1/TRAPPC8/BMP2K/ARF1/APOA1/SCAMP2/CHGA/FCN2/ANXA2/TBC1D5/JPT2/SEC24A/MYO18A/EHD4/PIGR/TMED2/CYBA/CPNE1/STX7/VAPB/SEPTIN8/CAV1/CMTM6/CHMP4C/CHMP1A/TBC1D10B/AN…
GO:0031430	CC	GO:0031430	M band	6	0.685528366996758	1.39816783899455	0.0675453047775947	0.684597112024255	0.663148969269039	1214	tags=86%, list=39%, signal=52%	CRYAB/ENO1/ALDOA/PPP2R5A/ALDOA/ANK1
GO:0006405	BP	GO:0006405	RNA export from nucleus	43	-0.420685734676266	-1.52906556171987	0.0677506775067751	0.684929142285053	0.663470597159877	144	tags=9%, list=5%, signal=9%	CPSF6/NUP107/SUPT6H/ALKBH5
GO:0035577	CC	GO:0035577	azurophil granule membrane	25	-0.449567958222055	-1.47177916394123	0.0677506775067751	0.684929142285053	0.663470597159877	473	tags=40%, list=15%, signal=34%	RAB5C/MAGT1/TOM1/LAMP1/PIGR/CPNE3/CPNE1/CMTM6/VAMP8/CD68
GO:0048844	BP	GO:0048844	artery morphogenesis	9	-0.615280033058961	-1.5138908090144	0.0680628272251309	0.686336209477305	0.664833581522278	496	tags=89%, list=16%, signal=75%	RBPJ/NAGLU/PDGFRB/APOB/APOE/FKBP10/EFEMP2/COL3A1
GO:0002791	BP	GO:0002791	regulation of peptide secretion	39	-0.424003914729705	-1.51308827452409	0.0679936454541777	0.686336209477305	0.664833581522278	333	tags=28%, list=11%, signal=25%	TARDBP/CHGA/F2/S100A8/ADRA2A/FGG/EIPR1/SLC25A22/CELA2A/FGB/FGA
GO:2001044	BP	GO:2001044	regulation of integrin-mediated signaling pathway	8	0.6410855432855	1.42839251320588	0.068515497553018	0.690024097183693	0.668405929240836	714	tags=56%, list=23%, signal=43%	FLNA/FLNA/CD177/LAMC1/NID1
GO:0046660	BP	GO:0046660	female sex differentiation	13	-0.598393646003804	-1.6586613116885	0.0709633264146912	0.694300785995638	0.67254863117123	252	tags=31%, list=8%, signal=28%	BAK1/MMP14/NUP107/CASP3
GO:0001533	CC	GO:0001533	cornified envelope	13	-0.592377757351726	-1.64198613168072	0.0749725123808299	0.694300785995638	0.67254863117123	386	tags=38%, list=13%, signal=34%	PKP2/ANXA2/DSG3/DSG2/PKP4
GO:0016538	MF	GO:0016538	cyclin-dependent protein serine/threonine kinase regulator activity	5	-0.753407623317629	-1.55076340367251	0.0726817042606516	0.694300785995638	0.67254863117123	18	tags=80%, list=1%, signal=80%	HEXIM1/CCNK/CASP3/CDK4
GO:0005539	MF	GO:0005539	glycosaminoglycan binding	54	-0.4133579346407	-1.54743445786723	0.0716332378223496	0.694300785995638	0.67254863117123	566	tags=35%, list=18%, signal=29%	AAMP/VCAN/APOB/FBN1/JCHAIN/COL5A1/APOE/ITIH1/LTBP2/F2/GNS/CFH/TNXB/EFEMP2/CLEC3B/SERPIND1/COL28A1/FN1/REG3G
GO:0051028	BP	GO:0051028	mRNA transport	57	-0.404066753866221	-1.54717502197899	0.0698324022346369	0.694300785995638	0.67254863117123	83	tags=5%, list=3%, signal=5%	NUP107/SUPT6H/ALKBH5
GO:0002062	BP	GO:0002062	chondrocyte differentiation	16	-0.53458343741353	-1.53932646368565	0.0752688172043011	0.694300785995638	0.67254863117123	94	tags=19%, list=3%, signal=18%	GLG1/COL3A1/COL2A1
GO:0065002	BP	GO:0065002	intracellular protein transmembrane transport	7	-0.667756345722915	-1.53919330463799	0.0708860759493671	0.694300785995638	0.67254863117123	191	tags=43%, list=6%, signal=40%	PEX5/SEC61A1/PEX16
GO:0005528	MF	GO:0005528	FK506 binding	4	-0.788200749645388	-1.53194643712247	0.0717821782178218	0.694300785995638	0.67254863117123	154	tags=60%, list=5%, signal=57%	FKBP1A/FKBP10/FKBP1A
GO:0019388	BP	GO:0019388	galactose catabolic process	5	-0.74343944760513	-1.53024558354713	0.075187969924812	0.694300785995638	0.67254863117123	350	tags=100%, list=11%, signal=89%	GALK1/GALM/GALE/GALT
GO:0086042	BP	GO:0086042	cardiac muscle cell-cardiac muscle cell adhesion	5	-0.742671009771987	-1.52866388297396	0.075187969924812	0.694300785995638	0.67254863117123	796	tags=100%, list=26%, signal=74%	DSC2/DSP/PKP2/DSG2
GO:0042834	MF	GO:0042834	peptidoglycan binding	5	-0.74122882083648	-1.52569537860375	0.075187969924812	0.694300785995638	0.67254863117123	471	tags=40%, list=15%, signal=34%	JCHAIN/REG3G
GO:0014012	BP	GO:0014012	peripheral nervous system axon regeneration	4	-0.784435037447086	-1.52462740147322	0.0742574257425743	0.694300785995638	0.67254863117123	667	tags=100%, list=22%, signal=78%	MAP1B/APOA4/TNC
GO:0006570	BP	GO:0006570	tyrosine metabolic process	4	-0.784336442220666	-1.52443577185869	0.0742574257425743	0.694300785995638	0.67254863117123	46	tags=100%, list=1%, signal=99%	SLC45A2/PCBD1/GSTZ1
GO:0070254	BP	GO:0070254	mucus secretion	5	-0.73860040364884	-1.52028522205897	0.075187969924812	0.694300785995638	0.67254863117123	247	tags=100%, list=8%, signal=92%	AGR2/NLRP6/CYBA/VAMP8
GO:0086080	MF	GO:0086080	protein binding involved in heterotypic cell-cell adhesion	8	-0.638380216798581	-1.51489748887834	0.0694087403598972	0.694300785995638	0.67254863117123	796	tags=75%, list=26%, signal=56%	CXADR/DSC2/DSP/SIRPA/PKP2/DSG2
GO:0045017	BP	GO:0045017	glycerolipid biosynthetic process	42	-0.417902409727487	-1.50994553178696	0.0765027322404372	0.694300785995638	0.67254863117123	731	tags=48%, list=24%, signal=37%	SACM1L/PLCG2/PLSCR1/SYNJ1/C3/TMX1/PCK2/FABP5/VAC14/PLIN5/APOA1/PCYT1A/PCYT2/PI4KA/DGKZ/GK/PIGT/PIP4K2A/CDS2/DPM3
GO:0061952	BP	GO:0061952	midbody abscission	8	-0.635074377971322	-1.50705262337927	0.0694087403598972	0.694300785995638	0.67254863117123	174	tags=50%, list=6%, signal=47%	CHMP6/CHMP4C/CHMP1A/CHMP4B
GO:0043303	BP	GO:0043303	mast cell degranulation	14	-0.530454820579634	-1.50480214685014	0.0700808625336927	0.694300785995638	0.67254863117123	303	tags=21%, list=10%, signal=19%	CHGA/VAMP8/SNAP23
GO:0010757	BP	GO:0010757	negative regulation of plasminogen activation	3	-0.840513704618232	-1.50269756262494	0.0735632183908046	0.694300785995638	0.67254863117123	410	tags=100%, list=13%, signal=87%	SERPINF2/CTSZ
GO:0034363	CC	GO:0034363	intermediate-density lipoprotein particle	3	-0.83984375	-1.50149979610864	0.0758620689655172	0.694300785995638	0.67254863117123	496	tags=100%, list=16%, signal=84%	APOE/APOC3
GO:0005614	CC	GO:0005614	interstitial matrix	3	-0.839524118775686	-1.50092834907681	0.0758620689655172	0.694300785995638	0.67254863117123	244	tags=67%, list=8%, signal=61%	VWA1/TNC
GO:1905048	BP	GO:1905048	regulation of metallopeptidase activity	3	-0.839493400719047	-1.50087343034248	0.0758620689655172	0.694300785995638	0.67254863117123	16	tags=100%, list=1%, signal=100%	PICALM/DDRGK1
GO:0009798	BP	GO:0009798	axis specification	3	-0.838319208996505	-1.49877417243649	0.0758620689655172	0.694300785995638	0.67254863117123	257	tags=100%, list=8%, signal=92%	WDR77/TMED2
GO:0009880	BP	GO:0009880	embryonic pattern specification	3	-0.836556909478673	-1.49562347640915	0.0758620689655172	0.694300785995638	0.67254863117123	257	tags=100%, list=8%, signal=92%	LAMA5/TMED2
GO:0098691	CC	GO:0098691	dopaminergic synapse	3	-0.836353375741558	-1.49525959221667	0.0758620689655172	0.694300785995638	0.67254863117123	356	tags=67%, list=12%, signal=59%	FLOT1/ADRA2A
GO:0036452	CC	GO:0036452	ESCRT complex	11	-0.567209311869279	-1.4938248618882	0.073490813648294	0.694300785995638	0.67254863117123	174	tags=45%, list=6%, signal=43%	CHMP6/CHMP4C/CHMP1A/VPS37C/CHMP4B
GO:0046883	BP	GO:0046883	regulation of hormone secretion	46	-0.401497040843256	-1.49354866384229	0.0770265538159211	0.694300785995638	0.67254863117123	333	tags=24%, list=11%, signal=22%	TARDBP/CHGA/F2/ADRA2A/VAMP8/FGG/EIPR1/SLC25A22/CELA2A/FGB/FGA
GO:0090087	BP	GO:0090087	regulation of peptide transport	40	-0.419932449720796	-1.4896458144427	0.0712250712250712	0.694300785995638	0.67254863117123	333	tags=28%, list=11%, signal=25%	TARDBP/CHGA/F2/S100A8/ADRA2A/FGG/EIPR1/SLC25A22/CELA2A/FGB/FGA
GO:0061013	BP	GO:0061013	regulation of mRNA catabolic process	58	-0.389687564977797	-1.48681469215995	0.0767045454545455	0.694300785995638	0.67254863117123	62	tags=3%, list=2%, signal=3%	YBX1/ALKBH5
GO:0009914	BP	GO:0009914	hormone transport	56	-0.386733391245375	-1.47225759798763	0.0775623268698061	0.694300785995638	0.67254863117123	110	tags=21%, list=4%, signal=21%	TARDBP/CHGA/F2/ADRA2A/VAMP8/FGG/EIPR1/SLC25A22/CELA2A/FGB/SNAP23/FGA
GO:0070661	BP	GO:0070661	leukocyte proliferation	62	-0.38237179785444	-1.46636012605985	0.0744985673352436	0.694300785995638	0.67254863117123	18	tags=3%, list=1%, signal=3%	CASP3/ALKBH5
GO:0070160	CC	GO:0070160	tight junction	28	-0.439645966236425	-1.46505441313974	0.0724233983286908	0.694300785995638	0.67254863117123	611	tags=39%, list=20%, signal=32%	TBCD/STRN/CDH5/MICALL2/AFDN/LSR/CGN/SYMPK/TJP1/CGNL1/CDK4
GO:0051592	BP	GO:0051592	response to calcium ion	31	-0.427380695840672	-1.46222708688516	0.0752089136490251	0.694300785995638	0.67254863117123	233	tags=19%, list=8%, signal=18%	CPNE3/CPNE1/CAV1/FGG/FGB/FGA
GO:0035904	BP	GO:0035904	aorta development	12	-0.540293541860717	-1.46140847036851	0.0731070496083551	0.694300785995638	0.67254863117123	146	tags=58%, list=5%, signal=56%	RBPJ/GAA/NAGLU/PDGFRB/FKBP10/EFEMP2/COL3A1
GO:0034113	BP	GO:0034113	heterotypic cell-cell adhesion	26	-0.439929308577615	-1.4534164382022	0.0741758241758242	0.694300785995638	0.67254863117123	393	tags=58%, list=13%, signal=51%	CXADR/DSC2/ITGAM/DSP/MYADM/SIRPA/PARVA/ITGA4/PKP2/FLOT1/APOA1/DSG2/FGG/FGB/FGA
GO:0051216	BP	GO:0051216	cartilage development	29	-0.430776380279594	-1.44945738437927	0.0765027322404372	0.694300785995638	0.67254863117123	115	tags=17%, list=4%, signal=17%	COL1A1/GLG1/COL3A1/DDRGK1/COL2A1
GO:0009306	BP	GO:0009306	protein secretion	82	-0.352106073386414	-1.43591864685638	0.0744985673352436	0.694300785995638	0.67254863117123	333	tags=27%, list=11%, signal=25%	CD2AP/SLC12A2/APOE/TARDBP/LTBP2/CHGA/SEC24A/MYO18A/TMED2/F2/P3H1/RCN3/MIA3/LLGL2/ADRA2A/FGG/EIPR1/SLC25A22/CELA2A/AP1G1/FGB/FGA
GO:0035592	BP	GO:0035592	establishment of protein localization to extracellular region	82	-0.352106073386414	-1.43591864685638	0.0744985673352436	0.694300785995638	0.67254863117123	333	tags=27%, list=11%, signal=25%	CD2AP/SLC12A2/APOE/TARDBP/LTBP2/CHGA/SEC24A/MYO18A/TMED2/F2/P3H1/RCN3/MIA3/LLGL2/ADRA2A/FGG/EIPR1/SLC25A22/CELA2A/AP1G1/FGB/FGA
GO:0050918	BP	GO:0050918	positive chemotaxis	13	0.546213832336883	1.43095674079459	0.0701754385964912	0.694300785995638	0.67254863117123	387	tags=31%, list=13%, signal=27%	MIF/CXCL12/HMGB1/CORO1A
GO:0070182	MF	GO:0070182	DNA polymerase binding	8	0.640654434018239	1.42743196549711	0.0701468189233279	0.694300785995638	0.67254863117123	319	tags=50%, list=10%, signal=45%	PCNA/PTGES3/HSP90AB1/HMGB1
GO:0015645	MF	GO:0015645	fatty acid ligase activity	8	0.640497350027403	1.42708196915293	0.0701468189233279	0.694300785995638	0.67254863117123	513	tags=56%, list=17%, signal=46%	ACSS3/ACSL1/ACSS2/ACSL4/ACSS1
GO:0016442	CC	GO:0016442	RISC complex	8	0.640493937060683	1.42707436477601	0.0701468189233279	0.694300785995638	0.67254863117123	563	tags=50%, list=18%, signal=41%	EIF4E/LIMD1/XPO5/DDX6
GO:0031332	CC	GO:0031332	RNAi effector complex	8	0.640493937060683	1.42707436477601	0.0701468189233279	0.694300785995638	0.67254863117123	563	tags=50%, list=18%, signal=41%	EIF4E/LIMD1/XPO5/DDX6
GO:0090303	BP	GO:0090303	positive regulation of wound healing	20	-0.46370216117391	-1.42693613223865	0.0722222222222222	0.694300785995638	0.67254863117123	410	tags=30%, list=13%, signal=26%	SERPINF2/EMILIN2/F2/PLG/ADRA2A/REG3G
GO:0015931	BP	GO:0015931	nucleobase-containing compound transport	79	-0.351254852538898	-1.42533054644558	0.0714285714285714	0.694300785995638	0.67254863117123	186	tags=9%, list=6%, signal=9%	SLC35A3/CPSF6/RSC1A1/NUP107/YBX1/SUPT6H/ALKBH5
GO:0098732	BP	GO:0098732	macromolecule deacylation	14	0.533111049638734	1.42485666560048	0.0760697305863708	0.694300785995638	0.67254863117123	742	tags=60%, list=24%, signal=46%	FLNA/ABHD10/FNTA/FLNA/HDAC6/PRKAA1/CCAR2/LYPLA1/HDAC1
GO:0007596	BP	GO:0007596	blood coagulation	77	-0.352166907399525	-1.4215741604028	0.0730337078651685	0.694300785995638	0.67254863117123	436	tags=29%, list=14%, signal=25%	LMAN1/PRKCD/SERPINF2/GNAQ/APOE/ANXA2/EMILIN2/F2/SLC4A1/DGKZ/CAV1/PLG/HBB/FBLN1/ADRA2A/HBB/SERPIND1/FGG/CELA2A/COL3A1/FGB/F5/FGA
GO:0050817	BP	GO:0050817	coagulation	77	-0.352166907399525	-1.4215741604028	0.0730337078651685	0.694300785995638	0.67254863117123	436	tags=29%, list=14%, signal=25%	LMAN1/PRKCD/SERPINF2/GNAQ/APOE/ANXA2/EMILIN2/F2/SLC4A1/DGKZ/CAV1/PLG/HBB/FBLN1/ADRA2A/HBB/SERPIND1/FGG/CELA2A/COL3A1/FGB/F5/FGA
GO:0044548	MF	GO:0044548	S100 protein binding	8	0.637804733761477	1.42108259363204	0.0734094616639478	0.694300785995638	0.67254863117123	1	tags=12%, list=0%, signal=13%	S100A11
GO:0071692	BP	GO:0071692	protein localization to extracellular region	83	-0.347451047657441	-1.41898185485351	0.0736543909348442	0.694300785995638	0.67254863117123	333	tags=28%, list=11%, signal=25%	FBN1/CD2AP/SLC12A2/APOE/TARDBP/LTBP2/CHGA/SEC24A/MYO18A/TMED2/F2/P3H1/RCN3/MIA3/LLGL2/ADRA2A/FGG/EIPR1/SLC25A22/CELA2A/AP1G1/FGB/FGA
GO:1902230	BP	GO:1902230	negative regulation of intrinsic apoptotic signaling pathway in response to DNA damage	9	0.611371398153115	1.41869104581499	0.0741935483870968	0.694300785995638	0.67254863117123	752	tags=89%, list=24%, signal=67%	TPT1/MIF/CXCL12/CD74/CLU/CD44/CCAR2/KDM1A
GO:0050871	BP	GO:0050871	positive regulation of B cell activation	16	0.512580990092705	1.41748218322429	0.0761904761904762	0.694300785995638	0.67254863117123	572	tags=44%, list=19%, signal=36%	TFRC/MIF/PTPRC/CD74/NCKAP1L/STAT6/INPP5D
GO:0005782	CC	GO:0005782	peroxisomal matrix	18	0.501619544949481	1.41700053111024	0.0756843800322061	0.694300785995638	0.67254863117123	902	tags=50%, list=29%, signal=36%	PRDX5/EPHX2/ACOX1/IDE/DAO/FABP1/IDH1/HSD17B4/GRHPR
GO:0031907	CC	GO:0031907	microbody lumen	18	0.501619544949481	1.41700053111024	0.0756843800322061	0.694300785995638	0.67254863117123	902	tags=50%, list=29%, signal=36%	PRDX5/EPHX2/ACOX1/IDE/DAO/FABP1/IDH1/HSD17B4/GRHPR
GO:0009264	BP	GO:0009264	deoxyribonucleotide catabolic process	9	0.609981075718992	1.41546479415513	0.0741935483870968	0.694300785995638	0.67254863117123	1115	tags=89%, list=36%, signal=57%	NUDT18/DCTPP1/DPYD/PNP/DUT/SAMHD1/UPP1/NT5C
GO:0046386	BP	GO:0046386	deoxyribose phosphate catabolic process	9	0.609981075718992	1.41546479415513	0.0741935483870968	0.694300785995638	0.67254863117123	1115	tags=89%, list=36%, signal=57%	NUDT18/DCTPP1/DPYD/PNP/DUT/SAMHD1/UPP1/NT5C
GO:0060479	BP	GO:0060479	lung cell differentiation	9	0.609954407624008	1.41540291067861	0.0741935483870968	0.694300785995638	0.67254863117123	469	tags=44%, list=15%, signal=38%	AIMP2/LTA4H/PPP3R1/CREB1
GO:0060487	BP	GO:0060487	lung epithelial cell differentiation	9	0.609954407624008	1.41540291067861	0.0741935483870968	0.694300785995638	0.67254863117123	469	tags=44%, list=15%, signal=38%	AIMP2/LTA4H/PPP3R1/CREB1
GO:0043506	BP	GO:0043506	regulation of JUN kinase activity	8	0.633902288686699	1.41238761776432	0.0750407830342577	0.694300785995638	0.67254863117123	591	tags=50%, list=19%, signal=40%	DNAJA1/TRAF6/AIDA/PDCD4
GO:2000434	BP	GO:2000434	regulation of protein neddylation	9	0.608491897733577	1.41200914758757	0.0774193548387097	0.694300785995638	0.67254863117123	641	tags=56%, list=21%, signal=44%	COPS5/RPL11/COPS6/COPS2/GPS1
GO:0001523	BP	GO:0001523	retinoid metabolic process	12	0.556831141277204	1.41199780010566	0.0775444264943457	0.694300785995638	0.67254863117123	258	tags=33%, list=8%, signal=31%	ALDH1A3/RDH11/AKR1B1/ALDH1A1
GO:1904035	BP	GO:1904035	regulation of epithelial cell apoptotic process	21	-0.456510606896672	-1.4114234249384	0.0754189944134078	0.694300785995638	0.67254863117123	461	tags=43%, list=15%, signal=37%	PAK4/CAST/CDH5/PLCG1/ITGA4/YAP1/FGG/FGB/FGA
GO:0045261	CC	GO:0045261	proton-transporting ATP synthase complex, catalytic core F(1)	5	0.723912590619496	1.41015397310419	0.0696517412935323	0.694300785995638	0.67254863117123	770	tags=60%, list=25%, signal=45%	ATP5PO/ATP5F1C/ATP5F1A
GO:0000966	BP	GO:0000966	RNA 5'-end processing	5	0.723781804017705	1.409899205818	0.0696517412935323	0.694300785995638	0.67254863117123	521	tags=60%, list=17%, signal=50%	HSD17B10/SSB/TBL3
GO:0034471	BP	GO:0034471	ncRNA 5'-end processing	5	0.723781804017705	1.409899205818	0.0696517412935323	0.694300785995638	0.67254863117123	521	tags=60%, list=17%, signal=50%	HSD17B10/SSB/TBL3
GO:0042446	BP	GO:0042446	hormone biosynthetic process	7	0.64876034904753	1.40102099791513	0.0724876441515651	0.694300785995638	0.67254863117123	446	tags=43%, list=15%, signal=37%	AKR1B1/DHRS11/NFKB1
GO:2000191	BP	GO:2000191	regulation of fatty acid transport	7	0.648446724977871	1.40034371560636	0.0724876441515651	0.694300785995638	0.67254863117123	432	tags=43%, list=14%, signal=37%	MIF/ACSL1/FABP3
GO:0035331	BP	GO:0035331	negative regulation of hippo signaling	4	0.768743936966335	1.39914190792559	0.0735785953177258	0.694300785995638	0.67254863117123	368	tags=50%, list=12%, signal=44%	MAPK14/LIMD1
GO:0098553	CC	GO:0098553	lumenal side of endoplasmic reticulum membrane	5	0.717976738338502	1.39859116043002	0.0762852404643449	0.694300785995638	0.67254863117123	493	tags=60%, list=16%, signal=50%	TAPBP/CD74/CANX
GO:0051865	BP	GO:0051865	protein autoubiquitination	7	0.646618251979625	1.39639506327515	0.0741350906095552	0.694300785995638	0.67254863117123	926	tags=71%, list=30%, signal=50%	TRAF6/UHRF1/TRIM21/UBE2D3/CUL3
GO:0003159	BP	GO:0003159	morphogenesis of an endothelium	6	0.684329648677637	1.39572299574298	0.070840197693575	0.694300785995638	0.67254863117123	212	tags=33%, list=7%, signal=31%	CSNK2B/CCM2
GO:0061154	BP	GO:0061154	endothelial tube morphogenesis	6	0.684329648677637	1.39572299574298	0.070840197693575	0.694300785995638	0.67254863117123	212	tags=33%, list=7%, signal=31%	CSNK2B/CCM2
GO:0005049	MF	GO:0005049	nuclear export signal receptor activity	6	0.682691576238549	1.39238206878425	0.070840197693575	0.694300785995638	0.67254863117123	543	tags=50%, list=18%, signal=41%	XPO1/RAN/XPO5
GO:0071624	BP	GO:0071624	positive regulation of granulocyte chemotaxis	6	0.682225677915878	1.39143184690816	0.0724876441515651	0.694300785995638	0.67254863117123	496	tags=50%, list=16%, signal=42%	CD74/NCKAP1L/RAC2
GO:0002698	BP	GO:0002698	negative regulation of immune effector process	24	0.458303318357337	1.39070694481748	0.0752351097178683	0.694300785995638	0.67254863117123	1086	tags=54%, list=35%, signal=35%	SERPINB9/PTPRC/FGL2/CD22/SERPING1/NCKAP1L/EPX/NLRX1/ACP5/C4BPA/ARG1/GRN/LGALS9
GO:0005747	CC	GO:0005747	mitochondrial respiratory chain complex I	21	0.472660833307643	1.39045002222271	0.0745341614906832	0.694300785995638	0.67254863117123	381	tags=33%, list=12%, signal=29%	NDUFB11/NDUFS8/NDUFA9/NDUFS2/NDUFV1/NDUFB5/NDUFA6
GO:0030964	CC	GO:0030964	NADH dehydrogenase complex	21	0.472660833307643	1.39045002222271	0.0745341614906832	0.694300785995638	0.67254863117123	381	tags=33%, list=12%, signal=29%	NDUFB11/NDUFS8/NDUFA9/NDUFS2/NDUFV1/NDUFB5/NDUFA6
GO:0045271	CC	GO:0045271	respiratory chain complex I	21	0.472660833307643	1.39045002222271	0.0745341614906832	0.694300785995638	0.67254863117123	381	tags=33%, list=12%, signal=29%	NDUFB11/NDUFS8/NDUFA9/NDUFS2/NDUFV1/NDUFB5/NDUFA6
GO:0070886	BP	GO:0070886	positive regulation of calcineurin-NFAT signaling cascade	7	0.642388598496834	1.38726097647099	0.0774299835255354	0.694300785995638	0.67254863117123	361	tags=43%, list=12%, signal=38%	PTBP1/CHERP/PPP3R1
GO:0106058	BP	GO:0106058	positive regulation of calcineurin-mediated signaling	7	0.642388598496834	1.38726097647099	0.0774299835255354	0.694300785995638	0.67254863117123	361	tags=43%, list=12%, signal=38%	PTBP1/CHERP/PPP3R1
GO:0098840	BP	GO:0098840	protein transport along microtubule	4	0.762157348149718	1.38715407686709	0.0769230769230769	0.694300785995638	0.67254863117123	697	tags=75%, list=23%, signal=58%	HSPB1/BAG3/MAP1A
GO:0099118	BP	GO:0099118	microtubule-based protein transport	4	0.762157348149718	1.38715407686709	0.0769230769230769	0.694300785995638	0.67254863117123	697	tags=75%, list=23%, signal=58%	HSPB1/BAG3/MAP1A
GO:0023058	BP	GO:0023058	adaptation of signaling pathway	3	0.835929599260375	1.37986315269955	0.0705467372134039	0.694300785995638	0.67254863117123	188	tags=33%, list=6%, signal=31%	RDH11
GO:0003987	MF	GO:0003987	acetate-CoA ligase activity	3	0.833984375	1.3766521845953	0.072310405643739	0.694300785995638	0.67254863117123	513	tags=75%, list=17%, signal=63%	ACSS3/ACSS2/ACSS1
GO:0031955	MF	GO:0031955	short-chain fatty acid-CoA ligase activity	3	0.833984375	1.3766521845953	0.072310405643739	0.694300785995638	0.67254863117123	513	tags=75%, list=17%, signal=63%	ACSS3/ACSS2/ACSS1
GO:0050218	MF	GO:0050218	propionate-CoA ligase activity	3	0.833984375	1.3766521845953	0.072310405643739	0.694300785995638	0.67254863117123	513	tags=75%, list=17%, signal=63%	ACSS3/ACSS2/ACSS1
GO:0072330	BP	GO:0072330	monocarboxylic acid biosynthetic process	34	0.417305207570636	1.37149464740518	0.0747663551401869	0.694300785995638	0.67254863117123	718	tags=37%, list=23%, signal=29%	ALDH1A3/MIF/OSBP/HSD17B10/PTGES3/CD74/ACSS2/PARK7/ACADL/ACSS1/CES1/PRKAA1/PTGIS
GO:0042492	BP	GO:0042492	gamma-delta T cell differentiation	3	0.828212958679337	1.36712534797315	0.0776014109347443	0.694300785995638	0.67254863117123	466	tags=67%, list=15%, signal=57%	PTPRC/NCKAP1L
GO:0045586	BP	GO:0045586	regulation of gamma-delta T cell differentiation	3	0.828212958679337	1.36712534797315	0.0776014109347443	0.694300785995638	0.67254863117123	466	tags=67%, list=15%, signal=57%	PTPRC/NCKAP1L
GO:0045588	BP	GO:0045588	positive regulation of gamma-delta T cell differentiation	3	0.828212958679337	1.36712534797315	0.0776014109347443	0.694300785995638	0.67254863117123	466	tags=67%, list=15%, signal=57%	PTPRC/NCKAP1L
GO:0046643	BP	GO:0046643	regulation of gamma-delta T cell activation	3	0.828212958679337	1.36712534797315	0.0776014109347443	0.694300785995638	0.67254863117123	466	tags=67%, list=15%, signal=57%	PTPRC/NCKAP1L
GO:0046645	BP	GO:0046645	positive regulation of gamma-delta T cell activation	3	0.828212958679337	1.36712534797315	0.0776014109347443	0.694300785995638	0.67254863117123	466	tags=67%, list=15%, signal=57%	PTPRC/NCKAP1L
GO:1903312	BP	GO:1903312	negative regulation of mRNA metabolic process	37	0.405447114897295	1.3600615882551	0.0740740740740741	0.694300785995638	0.67254863117123	561	tags=30%, list=18%, signal=25%	TAF15/SRSF4/PTBP1/FMR1/SRSF6/HNRNPD/U2AF2/MAPK14/MYD88/SRSF7/HNRNPC
GO:0030099	BP	GO:0030099	myeloid cell differentiation	92	0.325848372879527	1.29972043168041	0.0771558245083207	0.694300785995638	0.67254863117123	642	tags=31%, list=21%, signal=25%	NME2/FLNA/TFRC/CD101/ISG15/PRXL2A/TCIRG1/SLC4A2/STAT1/TRAF6/CD74/HSCB/MAPK14/FLNA/ACIN1/STAT5A/MYD88/HDAC6/NCKAP1L/CREB1/RAC2/TMOD3/HCLS1/GLO1/WDR1/PRTN3/INPP5D/ADAR/PAFAH1B1
GO:0006816	BP	GO:0006816	calcium ion transport	73	0.338240430214732	1.29698417460649	0.0718654434250764	0.694300785995638	0.67254863117123	680	tags=32%, list=22%, signal=25%	TPT1/CLIC2/FLNA/CLCA1/SPINK1/FMR1/WFS1/PTPRC/CXCL12/CHERP/PRKACA/FLNA/PPP3R1/DIAPH1/CORO1A/MYLK/SLC3A2/CAMK2B/BIN1/ATP1A2/HTT/THY1/CALM3/ERO1A
GO:1901615	BP	GO:1901615	organic hydroxy compound metabolic process	109	0.31379974664875	1.28469876801951	0.0691176470588235	0.694300785995638	0.67254863117123	614	tags=29%, list=20%, signal=24%	FDPS/ALDH1A3/EPHX2/CYB5R1/NPC1L1/OSBP/LDHB/RDH11/HSD17B10/AKR1B1/CYB5R3/SULT1A3/QDPR/NUDT4/ALDH1A1/GOT1/ACSS2/DHFR/PARK7/ACADL/DAO/GC/NFKB1/PNPO/CREB1/IMPA1/ALDH1B1/ACSS1/SNX17/CES1/INPP5B/ITPK1
GO:0031399	BP	GO:0031399	regulation of protein modification process	252	0.267521673563083	1.22567857570546	0.0714285714285714	0.694300785995638	0.67254863117123	752	tags=31%, list=24%, signal=25%	IKBKB/UBE2I/DNAJA1/CHI3L1/PTBP1/CDKN2C/COPS5/TFRC/MIF/MOB3A/SPINK1/IPO5/CDK7/ISG15/RPL11/DOCK7/WNK1/PDCD6/OSBP/MOB2/WFS1/AIMP2/PTPRC/COPS6/PRKAR2B/LCP2/TRAF6/HSPB1/CD74/HSP90AB1/U2AF2/ZFP91/PRRC1/DERL1/FNTA/PARK7/COPS2/CORO1C/ILK/MAP2K4/UBE2V1/ELANE/PPIA/HDAC6/NCKAP1L/S100A12/GOLGA2/PPP2R5D/CAB39/AIDA/HCLS1/NCL/ITGA5/PDCD4/SNTA1/NXN/CD44/ADAR/PPP2R1A/GPS1/RPS7/HTT/PAK2/THY1/PTK2/CALM3/DDX3X/PRKAA…
GO:0005730	CC	GO:0005730	nucleolus	261	0.264916135162072	1.21907653724055	0.0718157181571816	0.694300785995638	0.67254863117123	946	tags=37%, list=31%, signal=28%	RPS10/RPL26/FLNA/RPS6/PTBP1/ILF2/IPO5/TXNRD1/CDK7/DDX18/RPS23/HDHD3/STAG2/XPO1/RPL11/NPM3/NUP153/FMR1/RPL13A/COX7A2L/RAN/RPS17/OSBP/MOB2/FBL/STAT1/PPP1CB/WDFY1/RAE1/ZFP91/GRB2/TRA2A/RPS9/EEF1A1/POLR1C/RPL35/FLNA/PPP1CA/EXOSC4/CSTB/MAP1S/IKBIP/RIOX2/DDX54/PPID/SSRP1/H1-10/NOP58/DNTTIP2/NOP56/UTP11/TBL3/MTREX/NCL/DNAJB1/RPL27/RPS16/RSL1D1/HSPA8/RPL23A/RPS11/SBDS/RPS15A/URB1/ADAR/TCEA1/RPS7/RCC2/TOP…
GO:0006355	BP	GO:0006355	regulation of DNA-templated transcription	427	0.247962454630381	1.19254593153904	0.0712435233160622	0.694300785995638	0.67254863117123	946	tags=33%, list=31%, signal=27%	TAF15/DAP/NME2/IKBKB/CRTC2/UBE2I/FLNA/MAFG/SNF8/PTBP1/TCF4/COPS5/ILF2/HIF1AN/TFRC/SARNP/PCNA/PRDX5/CDK7/S100A9/H1-2/WNK1/BTAF1/ELOC/NUP62/WFS1/SRSF2/PSMC3/DRAP1/RBBP4/RPL10/STAT1/PFN1/TRAF6/HNRNPD/CD74/STRN3/CRYAB/H1-3/ZFP91/ACSS2/HMGB1/MNT/ENO1/SMARCD2/PARK7/MAPK14/RUVBL2/FLNA/PPP3R1/COPS2/LIMD1/AGRN/PPP2CB/ILK/SNW1/UBE2V1/RIOX2/DDX54/STAT5A/ELANE/PPID/PPIA/MYD88/NFKB1/HDAC6/SAMD1/SOD2/PFKM/CREB…
GO:0005544	MF	GO:0005544	calcium-dependent phospholipid binding	13	-0.581425722336736	-1.61162866233769	0.0846103667608227	0.69995531199285	0.678026003221003	525	tags=46%, list=17%, signal=38%	ESYT2/ANXA13/ANXA4/ANXA2/CPNE3/CPNE1
GO:0000014	MF	GO:0000014	single-stranded DNA endodeoxyribonuclease activity	4	-0.782935194510403	-1.52171230776883	0.0792079207920792	0.69995531199285	0.678026003221003	56	tags=100%, list=2%, signal=98%	ERCC4/EXOG/XRCC1
GO:0022602	BP	GO:0022602	ovulation cycle process	4	-0.780270207247147	-1.51653264034938	0.0816831683168317	0.69995531199285	0.678026003221003	18	tags=75%, list=1%, signal=75%	RETN/A2M/CASP3
GO:0070328	BP	GO:0070328	triglyceride homeostasis	4	-0.77889938130902	-1.513868303995	0.0816831683168317	0.69995531199285	0.678026003221003	684	tags=100%, list=22%, signal=78%	APOE/APOA1/APOC3
GO:0034204	BP	GO:0034204	lipid translocation	6	-0.684196870960177	-1.51272736455267	0.0860759493670886	0.69995531199285	0.678026003221003	706	tags=67%, list=23%, signal=51%	PLSCR1/PRKCD/SLC4A1/TMEM30B
GO:0045332	BP	GO:0045332	phospholipid translocation	6	-0.684196870960177	-1.51272736455267	0.0860759493670886	0.69995531199285	0.678026003221003	706	tags=67%, list=23%, signal=51%	PLSCR1/PRKCD/SLC4A1/TMEM30B
GO:0032908	BP	GO:0032908	regulation of transforming growth factor beta1 production	4	-0.777847328816308	-1.51182353549078	0.0816831683168317	0.69995531199285	0.678026003221003	615	tags=100%, list=20%, signal=80%	AGT/LUM/CD2AP
GO:0046761	BP	GO:0046761	viral budding from plasma membrane	7	-0.655875071355324	-1.51180670161385	0.0810126582278481	0.69995531199285	0.678026003221003	174	tags=57%, list=6%, signal=54%	CHMP6/CHMP4C/CHMP1A/CHMP4B
GO:1901186	BP	GO:1901186	positive regulation of ERBB signaling pathway	13	-0.545243452338815	-1.51133660239453	0.08	0.69995531199285	0.678026003221003	369	tags=38%, list=12%, signal=34%	AGT/HIP1/MMP9/ADRA2A/RALB
GO:0010714	BP	GO:0010714	positive regulation of collagen metabolic process	4	-0.776583482807141	-1.50936712525305	0.0841584158415842	0.69995531199285	0.678026003221003	599	tags=75%, list=19%, signal=60%	VIM/SERPINF2/F2
GO:0032967	BP	GO:0032967	positive regulation of collagen biosynthetic process	4	-0.776583482807141	-1.50936712525305	0.0841584158415842	0.69995531199285	0.678026003221003	599	tags=75%, list=19%, signal=60%	VIM/SERPINF2/F2
GO:1904970	BP	GO:1904970	brush border assembly	4	-0.776200994498854	-1.50862372123906	0.0841584158415842	0.69995531199285	0.678026003221003	437	tags=75%, list=14%, signal=64%	CDHR5/USH1C/CDHR2
GO:0030687	CC	GO:0030687	preribosome, large subunit precursor	7	-0.653391681385032	-1.50608243221595	0.0835443037974684	0.69995531199285	0.678026003221003	172	tags=43%, list=6%, signal=41%	FTSJ3/NOC2L/EBNA1BP2
GO:0090160	BP	GO:0090160	Golgi to lysosome transport	5	-0.731549500563215	-1.50577211901937	0.0802005012531328	0.69995531199285	0.678026003221003	812	tags=80%, list=26%, signal=59%	EHD3/ANKFY1/LAMP1/AP1G1
GO:0048736	BP	GO:0048736	appendage development	13	-0.541600267444742	-1.50123821669896	0.08	0.69995531199285	0.678026003221003	252	tags=31%, list=8%, signal=28%	BAK1/ITGB4/COL3A1/COL2A1
GO:0060173	BP	GO:0060173	limb development	13	-0.541600267444742	-1.50123821669896	0.08	0.69995531199285	0.678026003221003	252	tags=31%, list=8%, signal=28%	BAK1/ITGB4/COL3A1/COL2A1
GO:0034364	CC	GO:0034364	high-density lipoprotein particle	7	-0.649512796236407	-1.49714151523558	0.0860759493670886	0.69995531199285	0.678026003221003	377	tags=57%, list=12%, signal=50%	APOE/APOA1/APOA4/APOC3
GO:0046879	BP	GO:0046879	hormone secretion	55	-0.395321441950837	-1.49524058399405	0.0786516853932584	0.69995531199285	0.678026003221003	110	tags=22%, list=4%, signal=21%	TARDBP/CHGA/F2/ADRA2A/VAMP8/FGG/EIPR1/SLC25A22/CELA2A/FGB/SNAP23/FGA
GO:0032488	BP	GO:0032488	Cdc42 protein signal transduction	5	-0.72219513689645	-1.4865177281822	0.0852130325814536	0.69995531199285	0.678026003221003	483	tags=80%, list=16%, signal=68%	WAS/APOE/APOA1/APOC3
GO:0048146	BP	GO:0048146	positive regulation of fibroblast proliferation	9	-0.602197950852119	-1.48170246719995	0.0837696335078534	0.69995531199285	0.678026003221003	25	tags=33%, list=1%, signal=33%	AGT/FN1/CDK4
GO:0010543	BP	GO:0010543	regulation of platelet activation	14	-0.518555673328804	-1.47104646845105	0.0808625336927224	0.69995531199285	0.678026003221003	678	tags=60%, list=22%, signal=47%	CD9/EMILIN1/TMX1/PRKCD/GNAQ/APOE/EMILIN2/F2/CELA2A
GO:0002067	BP	GO:0002067	glandular epithelial cell differentiation	8	-0.61975280341341	-1.47069401731243	0.0848329048843188	0.69995531199285	0.678026003221003	320	tags=62%, list=10%, signal=56%	AGR2/RBM4/RHEB/YAP1/CAV1
GO:0060560	BP	GO:0060560	developmental growth involved in morphogenesis	42	-0.40111484436419	-1.44928948214508	0.0819672131147541	0.69995531199285	0.678026003221003	393	tags=26%, list=13%, signal=23%	ITGA4/APOE/CYFIP1/YAP1/CPNE1/SIN3A/PTK7/TNC/PLAA/DCLK1/FN1
GO:0055037	CC	GO:0055037	recycling endosome	47	-0.38524318786973	-1.43704040455581	0.0837988826815642	0.69995531199285	0.678026003221003	308	tags=23%, list=10%, signal=21%	SCAMP2/EHD4/STX7/CMTM6/MYO5B/VAMP8/EEA1/EIPR1/AP1G1/TMUB1/SNX18
GO:0007269	BP	GO:0007269	neurotransmitter secretion	22	-0.457176536379323	-1.4330001519234	0.0790960451977401	0.69995531199285	0.678026003221003	78	tags=14%, list=3%, signal=13%	RAB5A/SNAP23/PFN2
GO:0099643	BP	GO:0099643	signal release from synapse	22	-0.457176536379323	-1.4330001519234	0.0790960451977401	0.69995531199285	0.678026003221003	78	tags=14%, list=3%, signal=13%	RAB5A/SNAP23/PFN2
GO:0000045	BP	GO:0000045	autophagosome assembly	25	-0.437135186807962	-1.43107721091577	0.0813008130081301	0.69995531199285	0.678026003221003	155	tags=36%, list=5%, signal=34%	SH3GLB1/SEC22B/NSFL1C/TOM1/RAB43/PIP4K2A/RAB5A/SNX18/RALB
GO:1905037	BP	GO:1905037	autophagosome organization	25	-0.437135186807962	-1.43107721091577	0.0813008130081301	0.69995531199285	0.678026003221003	155	tags=36%, list=5%, signal=34%	SH3GLB1/SEC22B/NSFL1C/TOM1/RAB43/PIP4K2A/RAB5A/SNX18/RALB
GO:0035579	CC	GO:0035579	specific granule membrane	22	-0.455197546310007	-1.42679709283282	0.0819209039548023	0.69995531199285	0.678026003221003	398	tags=41%, list=13%, signal=36%	SLC2A3/AP1M1/TOM1/PGRMC1/HVCN1/CYBA/CMTM6/VAMP8/SNAP23
GO:0032994	CC	GO:0032994	protein-lipid complex	12	-0.527027838265808	-1.42552684288832	0.0835509138381201	0.69995531199285	0.678026003221003	524	tags=58%, list=17%, signal=49%	APOBR/APOB/LSR/APOE/APOA1/APOA4/APOC3
GO:0030331	MF	GO:0030331	nuclear estrogen receptor binding	11	0.572768214696485	1.41756017860599	0.0837359098228663	0.69995531199285	0.678026003221003	492	tags=36%, list=16%, signal=31%	PCNA/DDX54/PPID/PADI2
GO:0051926	BP	GO:0051926	negative regulation of calcium ion transport	15	0.51956953534337	1.41679756775663	0.0815047021943574	0.69995531199285	0.678026003221003	656	tags=47%, list=21%, signal=37%	CLIC2/SPINK1/FMR1/PPP3R1/BIN1/ATP1A2/CALM3
GO:0140029	BP	GO:0140029	exocytic process	24	-0.439814438141302	-1.41674869802628	0.0851648351648352	0.69995531199285	0.678026003221003	102	tags=29%, list=3%, signal=28%	SCRIB/SYNJ1/EXOC5/EXOC2/VAMP8/SNAP23/RALB
GO:0000027	BP	GO:0000027	ribosomal large subunit assembly	10	0.585387761958028	1.41521423181339	0.0852090032154341	0.69995531199285	0.678026003221003	1007	tags=60%, list=33%, signal=40%	RPL11/RPL10/RPL23A/NOP2/RPL5/RPLP0
GO:0050657	BP	GO:0050657	nucleic acid transport	71	-0.358381154160488	-1.41416395635679	0.0830945558739255	0.69995531199285	0.678026003221003	83	tags=7%, list=3%, signal=7%	CPSF6/NUP107/YBX1/SUPT6H/ALKBH5
GO:0050658	BP	GO:0050658	RNA transport	71	-0.358381154160488	-1.41416395635679	0.0830945558739255	0.69995531199285	0.678026003221003	83	tags=7%, list=3%, signal=7%	CPSF6/NUP107/YBX1/SUPT6H/ALKBH5
GO:0051236	BP	GO:0051236	establishment of RNA localization	71	-0.358381154160488	-1.41416395635679	0.0830945558739255	0.69995531199285	0.678026003221003	83	tags=7%, list=3%, signal=7%	CPSF6/NUP107/YBX1/SUPT6H/ALKBH5
GO:0051085	BP	GO:0051085	chaperone cofactor-dependent protein refolding	15	0.51761215229975	1.41146004246555	0.0846394984326019	0.69995531199285	0.678026003221003	680	tags=47%, list=22%, signal=37%	SDF2/PTGES3/CD74/DNAJB1/HSPH1/HSPA8/ERO1A
GO:0090100	BP	GO:0090100	positive regulation of transmembrane receptor protein serine/threonine kinase signaling pathway	13	0.538206951285957	1.40998052281134	0.0813397129186603	0.69995531199285	0.678026003221003	386	tags=31%, list=13%, signal=27%	CSNK2B/HSP90AB1/ILK/SNW1
GO:0043543	BP	GO:0043543	protein acylation	17	0.504110900804074	1.40695013247685	0.0797448165869219	0.69995531199285	0.678026003221003	712	tags=47%, list=23%, signal=36%	PARK7/BAG6/HDAC6/DDX3X/PRKAA1/NMT1/GTF2B/NAA50
GO:0034605	BP	GO:0034605	cellular response to heat	18	0.497786454782959	1.4061726220775	0.0821256038647343	0.69995531199285	0.678026003221003	883	tags=50%, list=29%, signal=36%	PDCD6/HSP90AB1/PRKACA/BAG3/HDAC6/DNAJB1/HSP90AA1/DNAJB6/VCP
GO:0070050	BP	GO:0070050	neuron cellular homeostasis	18	0.497555554835467	1.40552036410326	0.0821256038647343	0.69995531199285	0.678026003221003	790	tags=50%, list=26%, signal=37%	ATP6V0D1/ATP6V1D/ATP6V1E1/ATP6V1F/PRKAA1/MAP1A/ATP6V1B2/ATP6AP1/HEXB
GO:0009129	BP	GO:0009129	pyrimidine nucleoside monophosphate metabolic process	12	0.553776881692804	1.40425288877718	0.0840064620355412	0.69995531199285	0.678026003221003	1115	tags=67%, list=36%, signal=43%	TYMS/DPYD/DUT/CMPK1/UMPS/SHMT1/UPP1/NT5C
GO:0045947	BP	GO:0045947	negative regulation of translational initiation	9	0.602736338566855	1.39865333755433	0.0854838709677419	0.69995531199285	0.678026003221003	148	tags=22%, list=5%, signal=21%	FMR1/RPL13A
GO:0019955	MF	GO:0019955	cytokine binding	14	0.523190287311708	1.39834124383408	0.0855784469096672	0.69995531199285	0.678026003221003	411	tags=36%, list=13%, signal=31%	COPS5/CD74/HMGB1/PARK7/ELANE
GO:0014046	BP	GO:0014046	dopamine secretion	5	0.716553756073227	1.39581924553168	0.0796019900497512	0.69995531199285	0.678026003221003	186	tags=40%, list=6%, signal=38%	TGM2/CXCL12
GO:0023061	BP	GO:0023061	signal release	82	-0.34181151577979	-1.39393656149694	0.0859598853868195	0.69995531199285	0.678026003221003	110	tags=13%, list=4%, signal=13%	ADRA2A/VAMP8/RAB5A/FGG/EIPR1/SLC25A22/CELA2A/FGB/SNAP23/PFN2/FGA
GO:0014888	BP	GO:0014888	striated muscle adaptation	8	0.624058826945384	1.39045555705482	0.0848287112561175	0.69995531199285	0.678026003221003	579	tags=38%, list=19%, signal=31%	RPS6KB1/ACTA1/CAMK2B
GO:0002495	BP	GO:0002495	antigen processing and presentation of peptide antigen via MHC class II	5	0.713277013470588	1.38943627656578	0.0829187396351575	0.69995531199285	0.678026003221003	257	tags=33%, list=8%, signal=31%	TRAF6/CD74
GO:0045454	BP	GO:0045454	cell redox homeostasis	19	0.484277384646256	1.38390885612006	0.0846645367412141	0.69995531199285	0.678026003221003	1012	tags=53%, list=33%, signal=36%	PRDX5/TXNRD1/GPX1/ERP44/ERO1A/BOLA1/NNT/GIT1/TXN/PRDX6
GO:0007599	BP	GO:0007599	hemostasis	78	-0.341309661744768	-1.38375883003345	0.0819209039548023	0.69995531199285	0.678026003221003	436	tags=28%, list=14%, signal=25%	LMAN1/PRKCD/SERPINF2/GNAQ/APOE/ANXA2/EMILIN2/F2/SLC4A1/DGKZ/CAV1/PLG/HBB/FBLN1/ADRA2A/HBB/SERPIND1/FGG/CELA2A/COL3A1/FGB/F5/FGA
GO:0010257	BP	GO:0010257	NADH dehydrogenase complex assembly	19	0.484081729264531	1.38334973602877	0.0846645367412141	0.69995531199285	0.678026003221003	381	tags=37%, list=12%, signal=32%	NDUFB11/NDUFS8/BCS1L/NDUFA9/NDUFS2/NDUFB5/NDUFA6
GO:0032981	BP	GO:0032981	mitochondrial respiratory chain complex I assembly	19	0.484081729264531	1.38334973602877	0.0846645367412141	0.69995531199285	0.678026003221003	381	tags=37%, list=12%, signal=32%	NDUFB11/NDUFS8/BCS1L/NDUFA9/NDUFS2/NDUFB5/NDUFA6
GO:0005657	CC	GO:0005657	replication fork	19	0.483886601051807	1.38279212241676	0.0846645367412141	0.69995531199285	0.678026003221003	553	tags=37%, list=18%, signal=30%	PRPF19/PCNA/H2AX/POLD2/RFC5/UHRF1/DMAP1
GO:0038026	BP	GO:0038026	reelin-mediated signaling pathway	4	0.759137485273971	1.38165781666591	0.0819397993311037	0.69995531199285	0.678026003221003	727	tags=75%, list=24%, signal=57%	STAT5A/PAFAH1B1/CRKL
GO:0000221	CC	GO:0000221	vacuolar proton-transporting V-type ATPase, V1 domain	6	0.677268418733497	1.38132128009277	0.0790774299835255	0.69995531199285	0.678026003221003	704	tags=67%, list=23%, signal=52%	ATP6V1D/ATP6V1E1/ATP6V1F/ATP6V1B2
GO:0033180	CC	GO:0033180	proton-transporting V-type ATPase, V1 domain	6	0.677268418733497	1.38132128009277	0.0790774299835255	0.69995531199285	0.678026003221003	704	tags=67%, list=23%, signal=52%	ATP6V1D/ATP6V1E1/ATP6V1F/ATP6V1B2
GO:0035666	BP	GO:0035666	TRIF-dependent toll-like receptor signaling pathway	4	0.758044718514023	1.37966894144243	0.0819397993311037	0.69995531199285	0.678026003221003	244	tags=50%, list=8%, signal=46%	IKBKB/TRAF6
GO:0006275	BP	GO:0006275	regulation of DNA replication	29	0.436733538827877	1.37893564377968	0.0849056603773585	0.69995531199285	0.678026003221003	746	tags=38%, list=24%, signal=29%	S100A11/PCNA/MCM2/RUVBL2/MAP2K4/SLFN11/RFC5/PDS5A/PPP2R1A/CDK1/MCM7
GO:0032620	BP	GO:0032620	interleukin-17 production	6	0.675073775072563	1.37684519955038	0.0807248764415156	0.69995531199285	0.678026003221003	852	tags=67%, list=28%, signal=48%	MYD88/NCKAP1L/PHB1/RFTN1
GO:0032660	BP	GO:0032660	regulation of interleukin-17 production	6	0.675073775072563	1.37684519955038	0.0807248764415156	0.69995531199285	0.678026003221003	852	tags=67%, list=28%, signal=48%	MYD88/NCKAP1L/PHB1/RFTN1
GO:0034450	MF	GO:0034450	ubiquitin-ubiquitin ligase activity	6	0.675069346208234	1.37683616667009	0.0807248764415156	0.69995531199285	0.678026003221003	888	tags=67%, list=29%, signal=48%	PRPF19/TRAF6/UBE4A/UBE2K
GO:0043518	BP	GO:0043518	negative regulation of DNA damage response, signal transduction by p53 class mediator	4	0.756431129925106	1.37673215155917	0.0852842809364548	0.69995531199285	0.678026003221003	752	tags=100%, list=24%, signal=76%	MIF/CD74/CD44/KDM1A
GO:1902166	BP	GO:1902166	negative regulation of intrinsic apoptotic signaling pathway in response to DNA damage by p53 class mediator	4	0.756431129925106	1.37673215155917	0.0852842809364548	0.69995531199285	0.678026003221003	752	tags=100%, list=24%, signal=76%	MIF/CD74/CD44/KDM1A
GO:0009211	BP	GO:0009211	pyrimidine deoxyribonucleoside triphosphate metabolic process	4	0.756132544276959	1.37618871482641	0.0852842809364548	0.69995531199285	0.678026003221003	686	tags=75%, list=22%, signal=58%	TYMS/DCTPP1/DUT
GO:0002054	MF	GO:0002054	nucleobase binding	4	0.755341337005313	1.37474868883286	0.0852842809364548	0.69995531199285	0.678026003221003	552	tags=75%, list=18%, signal=62%	DPYD/PNP/PYGL
GO:0005865	CC	GO:0005865	striated muscle thin filament	7	0.635350429536003	1.37206180081934	0.085667215815486	0.69995531199285	0.678026003221003	529	tags=62%, list=17%, signal=52%	TPM1/TPM2/LMOD1/TMOD3/ACTA1
GO:0036379	CC	GO:0036379	myofilament	7	0.635350429536003	1.37206180081934	0.085667215815486	0.69995531199285	0.678026003221003	529	tags=62%, list=17%, signal=52%	TPM1/TPM2/LMOD1/TMOD3/ACTA1
GO:0008171	MF	GO:0008171	O-methyltransferase activity	6	0.670542521399189	1.3676034913127	0.0840197693574959	0.69995531199285	0.678026003221003	116	tags=33%, list=4%, signal=32%	ASMTL/MRM1
GO:0019985	BP	GO:0019985	translesion synthesis	6	0.669918413761372	1.36633059398375	0.0840197693574959	0.69995531199285	0.678026003221003	883	tags=67%, list=29%, signal=48%	PCNA/POLD2/POLDIP2/VCP
GO:0000380	BP	GO:0000380	alternative mRNA splicing, via spliceosome	31	0.425104594624307	1.36618998117043	0.0793157076205288	0.69995531199285	0.678026003221003	1083	tags=50%, list=35%, signal=33%	PTBP1/FMR1/SRSF2/SRSF6/RBM8A/RBM17/PUF60/RBM25/SMU1/HNRNPUL2/HNRNPL/THRAP3/DDX17/DDX5/HNRNPU/DHX9
GO:0050921	BP	GO:0050921	positive regulation of chemotaxis	28	0.435872742178462	1.36568782376434	0.0839813374805599	0.69995531199285	0.678026003221003	653	tags=29%, list=21%, signal=23%	WNK1/CXCL12/HSPB1/CD74/HMGB1/NCKAP1L/RAC2/PTK2
GO:0016236	BP	GO:0016236	macroautophagy	107	-0.320127947177592	-1.3649214484702	0.0846394984326019	0.69995531199285	0.678026003221003	176	tags=13%, list=6%, signal=13%	QSOX1/CHMP4C/CHMP1A/RAB43/VPS37C/VAMP8/PIP4K2A/RAB5A/PLAA/CHMP4B/SNX18/CASP3/DDRGK1/RALB
GO:0033162	CC	GO:0033162	melanosome membrane	6	0.66813247955962	1.36268809589955	0.085667215815486	0.69995531199285	0.678026003221003	757	tags=67%, list=25%, signal=50%	RAB7A/RAB27A/CANX/RAB32
GO:0045009	CC	GO:0045009	chitosome	6	0.66813247955962	1.36268809589955	0.085667215815486	0.69995531199285	0.678026003221003	757	tags=67%, list=25%, signal=50%	RAB7A/RAB27A/CANX/RAB32
GO:0090741	CC	GO:0090741	pigment granule membrane	6	0.66813247955962	1.36268809589955	0.085667215815486	0.69995531199285	0.678026003221003	757	tags=67%, list=25%, signal=50%	RAB7A/RAB27A/CANX/RAB32
GO:0051126	BP	GO:0051126	negative regulation of actin nucleation	3	0.823022089688157	1.35855681677416	0.0811287477954145	0.69995531199285	0.678026003221003	387	tags=67%, list=13%, signal=58%	CORO1B/CORO1A
GO:0090316	BP	GO:0090316	positive regulation of intracellular protein transport	34	0.41165742762872	1.35293293329393	0.0825545171339564	0.69995531199285	0.678026003221003	728	tags=40%, list=24%, signal=31%	FLNA/IPO5/RAN/SAR1B/PDCD5/PRKACA/MAPK14/FLNA/BAG3/HCLS1/DMAP1/CDK1/SORL1/HSP90AA1
GO:0031072	MF	GO:0031072	heat shock protein binding	47	0.384094100883242	1.35101304960488	0.0854037267080745	0.69995531199285	0.678026003221003	848	tags=40%, list=28%, signal=30%	DNAJA1/TFRC/NUP62/PTGES3/HSP90AB1/DNAJA2/BAG6/PPID/HDAC6/TFAM/DNAJB1/HSPA8/HTT/STIP1/CDK1/DNAJB6/DNAJC8/LMAN2/ST13
GO:0001725	CC	GO:0001725	stress fiber	47	0.383031556676269	1.34727565534107	0.0854037267080745	0.69995531199285	0.678026003221003	1168	tags=62%, list=38%, signal=39%	TPM1/PDLIM7/CORO1B/PGM5/ABLIM1/SYNPO/ILK/BAG3/MYL9/PDLIM3/SYNPO2/FSCN1/MYLK/ACTA1/LPP/PTK2/CNN2/PPP1R12B/EVL/TPM4/LCP1/ACTN4/PDLIM4/FLNB/PPP1R12C/FERMT2/MYH9/ZYX/ACTA2/PDLIM7/PALLD
GO:0097517	CC	GO:0097517	contractile actin filament bundle	47	0.383031556676269	1.34727565534107	0.0854037267080745	0.69995531199285	0.678026003221003	1168	tags=62%, list=38%, signal=39%	TPM1/PDLIM7/CORO1B/PGM5/ABLIM1/SYNPO/ILK/BAG3/MYL9/PDLIM3/SYNPO2/FSCN1/MYLK/ACTA1/LPP/PTK2/CNN2/PPP1R12B/EVL/TPM4/LCP1/ACTN4/PDLIM4/FLNB/PPP1R12C/FERMT2/MYH9/ZYX/ACTA2/PDLIM7/PALLD
GO:0043177	MF	GO:0043177	organic acid binding	52	0.371847022151184	1.33738461520999	0.0830769230769231	0.69995531199285	0.678026003221003	638	tags=32%, list=21%, signal=26%	PLOD1/NME2/TYMS/HIF1AN/S100A9/ACOX1/FCN1/DDAH1/DHFR/AGRN/PPIA/CD22/FABP3/YARS2/PYGL/SCLY/FABP1
GO:0042277	MF	GO:0042277	peptide binding	58	0.3590484619108	1.31555142567213	0.0846153846153846	0.69995531199285	0.678026003221003	583	tags=34%, list=19%, signal=28%	IPO5/NUP153/PFDN6/TAP2/TAPBP/IDE/CD74/HSP90AB1/CRYAB/PPP3R1/GSS/PPID/PPIA/LNPEP/RPS6KB1/PFDN2/TAP1/ERAP1/NPEPPS/CLU
GO:0043254	BP	GO:0043254	regulation of protein-containing complex assembly	140	0.294897902364639	1.2483489905354	0.0860832137733142	0.69995531199285	0.678026003221003	834	tags=34%, list=27%, signal=26%	VASP/STMN1/TFRC/ISG15/RPL13A/DRG1/SAR1B/PFN1/RAP1B/ARPC2/ARPC5L/CRYAB/HMGB1/COTL1/GRB2/PARK7/BRCC3/CORO1A/CLIP1/LMOD1/MYD88/HDAC6/NCKAP1L/ARHGAP18/FSCN1/VDAC2/TMOD3/AIDA/PSMC6/SSH3/HCLS1/CAPZB/CLU/BIN1/HSPA8/DDX3X/DUT/SORL1/TWF1/HSP90AA1/ARPC5/GFAP/HCFC1/EVL/NEK7/VPS18/TWF2/LCP1
GO:0016032	BP	GO:0016032	viral process	129	0.297841585253706	1.24322298514071	0.0843023255813953	0.69995531199285	0.678026003221003	817	tags=36%, list=27%, signal=28%	MX1/MX1/CSNK2B/OAS1/PTBP1/TFRC/ISG15/CFL1/NUP153/FMR1/RAN/PSMC3/FCN1/STAT1/IDE/CD74/RAB7A/HSP90AB1/HMGB1/SNX3/EEF1A1/SNW1/DAG1/PPID/PPIA/SSB/VPS4B/CANX/SLC3A2/DDX6/ITGA5/OAS2/ADAR/CDK1/DDX3X/STOM/TRIM21/GTF2B/EIF3B/PABPC1/PHB1/HDAC1/EPS15/HCFC1/LTF/SMARCB1/VPS18
GO:2001141	BP	GO:2001141	regulation of RNA biosynthetic process	429	0.246045038354525	1.18295966139719	0.0818181818181818	0.69995531199285	0.678026003221003	946	tags=33%, list=31%, signal=27%	TAF15/DAP/NME2/IKBKB/CRTC2/UBE2I/FLNA/MAFG/SNF8/PTBP1/TCF4/COPS5/ILF2/HIF1AN/TFRC/SARNP/PCNA/PRDX5/CDK7/S100A9/H1-2/WNK1/BTAF1/ELOC/NUP62/WFS1/SRSF2/PSMC3/DRAP1/RBBP4/RPL10/STAT1/PFN1/TRAF6/HNRNPD/CD74/STRN3/CRYAB/H1-3/ZFP91/ACSS2/HMGB1/MNT/ENO1/SMARCD2/PARK7/MAPK14/RUVBL2/FLNA/PPP3R1/COPS2/LIMD1/AGRN/PPP2CB/ILK/SNW1/UBE2V1/RIOX2/DDX54/STAT5A/ELANE/PPID/PPIA/MYD88/NFKB1/HDAC6/SAMD1/SOD2/PFKM/CREB…
GO:0032774	BP	GO:0032774	RNA biosynthetic process	452	0.243282508928085	1.17730562308261	0.0826972010178117	0.69995531199285	0.678026003221003	946	tags=33%, list=31%, signal=27%	TAF15/DAP/NME2/YBX2/IKBKB/CRTC2/UBE2I/FLNA/MAFG/SNF8/PTBP1/TCF4/COPS5/ILF2/HIF1AN/TFRC/SARNP/PCNA/PRDX5/CDK7/S100A9/NPM3/H1-2/FMR1/WNK1/BTAF1/ELOC/NUP62/WFS1/SRSF2/PSMC3/DRAP1/RBBP4/RPL10/STAT1/PFN1/TRAF6/HNRNPD/CD74/STRN3/CRYAB/ELOB/H1-3/ZFP91/ACSS2/HMGB1/MNT/ENO1/SMARCD2/PARK7/MAPK14/POLR1C/RUVBL2/FLNA/PPP3R1/COPS2/LIMD1/AGRN/PPP2CB/ILK/SNW1/UBE2V1/RIOX2/DDX54/STAT5A/ELANE/PPID/PPIA/MYD88/NFKB1…
GO:0006351	BP	GO:0006351	DNA-templated transcription	449	0.242515983613658	1.1726843503402	0.0828025477707006	0.69995531199285	0.678026003221003	946	tags=33%, list=31%, signal=27%	TAF15/DAP/NME2/YBX2/IKBKB/CRTC2/UBE2I/FLNA/MAFG/SNF8/PTBP1/TCF4/COPS5/ILF2/HIF1AN/TFRC/SARNP/PCNA/PRDX5/CDK7/S100A9/NPM3/H1-2/WNK1/BTAF1/ELOC/NUP62/WFS1/SRSF2/PSMC3/DRAP1/RBBP4/RPL10/STAT1/PFN1/TRAF6/HNRNPD/CD74/STRN3/CRYAB/ELOB/H1-3/ZFP91/ACSS2/HMGB1/MNT/ENO1/SMARCD2/PARK7/MAPK14/POLR1C/RUVBL2/FLNA/PPP3R1/COPS2/LIMD1/AGRN/PPP2CB/ILK/SNW1/UBE2V1/RIOX2/DDX54/STAT5A/ELANE/PPID/PPIA/MYD88/NFKB1/HDAC…
GO:0071705	BP	GO:0071705	nitrogen compound transport	485	-0.221497209111152	-1.15322959626628	0.0798718438213055	0.69995531199285	0.678026003221003	204	tags=21%, list=7%, signal=23%	TCN1/PCK2/RAB14/EXOC5/AP1M1/PDCD10/RBM22/SEC16A/M6PR/SEC22B/CHMP6/IPO4/COG3/GDI1/DDX19B/RHOB/APOB/PGRMC2/SNX2/AP3D1/RAB5C/RAB2A/RANGAP1/ATP13A1/CDH17/VTA1/EXOC2/CD2AP/DDX39B/PRKCD/RRBP1/BICD2/MYO6/SLC12A2/AUP1/TOM1/PGRMC1/UBAC2/APOE/MAGOHB/HIP1/KPNB1/FLOT1/TARDBP/LTBP2/AIFM1/ARF1/SCAMP2/CHGA/TBC1D5/MAOB/SEC24A/MYO18A/TMED2/F2/P3H1/NHERF1/STX7/RCN3/SEC61A1/KPNA2/CAV1/SLC35A3/CMTM6/CHMP4C/CHMP1A/RA…
GO:0008017	MF	GO:0008017	microtubule binding	60	0.35267132265831	1.30326827477821	0.0864197530864197	0.701972528652842	0.679980021322118	697	tags=29%, list=23%, signal=23%	MX1/MX1/S100A9/FMR1/DRG1/CRYAB/RAE1/FNTA/TBCB/MAP1S/CLIP1/HDAC6/GOLGA2/CLIP2/SBDS/PAFAH1B1/RCC2/MAP1A
GO:0019731	BP	GO:0019731	antibacterial humoral response	10	-0.580767977508161	-1.47583577884603	0.0868421052631579	0.703452555068032	0.68141367912535	39	tags=30%, list=1%, signal=30%	JCHAIN/FGB/FGA
GO:0043588	BP	GO:0043588	skin development	43	-0.390144244060058	-1.41805646952716	0.0867208672086721	0.703452555068032	0.68141367912535	405	tags=28%, list=13%, signal=25%	ROCK2/COL5A1/LSR/YAP1/COL5A2/SHARPIN/ITGB4/COL1A1/COL1A2/COL3A1/REG3G/CASP3
GO:0051209	BP	GO:0051209	release of sequestered calcium ion into cytosol	25	0.450900196823389	1.37579068555528	0.0868878357030016	0.703452555068032	0.68141367912535	680	tags=48%, list=22%, signal=38%	CLIC2/FLNA/PTPRC/CHERP/PRKACA/FLNA/DIAPH1/CORO1A/ATP1A2/HTT/THY1/CALM3/ERO1A
GO:0016881	MF	GO:0016881	acid-amino acid ligase activity	4	0.752949999297022	1.37039636728237	0.0869565217391304	0.703452555068032	0.68141367912535	597	tags=75%, list=19%, signal=61%	GSS/PPCS/TTLL3
GO:0071559	BP	GO:0071559	response to transforming growth factor beta	55	-0.383396718948541	-1.45013721267695	0.0870786516853933	0.70372319732717	0.681675842275085	475	tags=29%, list=15%, signal=25%	FBN1/CDH5/CD2AP/FUT8/ROCK2/LTBP2/SIN3A/CAV1/FKBP1A/COL1A1/CLEC3B/GLG1/COL1A2/COL4A2/COL3A1/FKBP1A
GO:0006505	BP	GO:0006505	GPI anchor metabolic process	5	-0.716283068488193	-1.47434872558151	0.087719298245614	0.704595496839264	0.682520813006307	109	tags=60%, list=4%, signal=58%	DPM1/PIGT/DPM3
GO:0044854	BP	GO:0044854	plasma membrane raft assembly	5	-0.715883627670079	-1.47352654356012	0.087719298245614	0.704595496839264	0.682520813006307	356	tags=80%, list=12%, signal=71%	COL6A1/CAV2/FLOT1/CAV1
GO:0098636	CC	GO:0098636	protein complex involved in cell adhesion	22	-0.448970069660359	-1.40727733563855	0.0875706214689266	0.704595496839264	0.682520813006307	754	tags=48%, list=25%, signal=36%	ITGAM/VTN/ITGA1/EMILIN1/ITGA4/EMILIN2/LGALS2/TNXB/TNC/MMRN2/ITGB4
GO:0042742	BP	GO:0042742	defense response to bacterium	60	-0.363653025884496	-1.39378835684485	0.0875706214689266	0.704595496839264	0.682520813006307	303	tags=22%, list=10%, signal=20%	CHGA/FCN2/EMILIN2/CYBA/F2/SHARPIN/MMRN2/S100A8/HP/BPI/FGB/REG3G/FGA
GO:1902903	BP	GO:1902903	regulation of supramolecular fiber organization	135	0.296797326809951	1.25612550516103	0.0876944837340877	0.704595496839264	0.682520813006307	596	tags=28%, list=19%, signal=23%	DSTN/VASP/FLNA/STMN1/TPM1/PFDN6/GPX1/WASHC4/CXCL12/DRG1/PFN1/ARPC2/ARPC5L/CRYAB/CORO1B/COTL1/GRB2/PARK7/SYNPO/FLNA/CORO1A/MAP1S/CLIP1/SYNPO2/LMOD1/HDAC6/NCKAP1L/ARHGAP18/ACTG1/PFDN2/TMOD3/SSH3/HCLS1/CAPZB/WDR1/CLU/BIN1/HSPA8
GO:0005524	MF	GO:0005524	ATP binding	389	0.246470303985974	1.17800689379593	0.0875160875160875	0.704595496839264	0.682520813006307	925	tags=34%, list=30%, signal=27%	NME2/IKBKB/UBE2I/OAS1/DNAJA1/DQX1/AFG2A/PRPS2/CDK7/DDX18/ACSS3/WNK1/TAP2/BTAF1/PSMC3/ACSL1/PSMC1/BCS1L/CUL9/NME1/CSK/TP53RK/IDE/AACS/STK38L/MCM2/AK4/HSP90AB1/DNAJA2/NUBP2/SELENOO/PRKACA/ACSS2/ACSL4/CCT2/PGK1/PEBP1/TEP1/CKB/MAPK14/RUVBL2/SPG7/ILK/MAP2K4/GSS/FCSK/DDX54/CKM/CCT3/GART/ASNS/VPS4B/SLFN11/GMPS/PFKM/RPS6KB1/NARS1/MYLK/ACTG1/RFC5/TCP1/NADK2/ACSS1/TARS1/GALK2/ACTA1/YARS2/PSMC6/PPCS/MTREX/P…
GO:0043162	BP	GO:0043162	ubiquitin-dependent protein catabolic process via the multivesicular body sorting pathway	15	-0.525047748243766	-1.47881121821599	0.0879120879120879	0.704717504717505	0.682638998428472	174	tags=33%, list=6%, signal=32%	CHMP4C/CHMP1A/VPS37C/PLAA/CHMP4B
GO:0051248	BP	GO:0051248	negative regulation of protein metabolic process	230	0.267966420444531	1.21150337585785	0.0878661087866109	0.704717504717505	0.682638998428472	797	tags=32%, list=26%, signal=25%	TYMS/IKBKB/FLNA/DNAJA1/MIF/SPINK1/IPO5/EIF4E/ISG15/RPL11/SERPINB10/PFDN6/FMR1/WNK1/RPL13A/SERPINB9/GPX1/WFS1/PTPRC/PRKAR2B/HSPB1/AHSG/HSP90AB1/U2AF2/CRYAB/SNX3/DHFR/PARK7/FLNA/LIMD1/CORO1C/BAG6/CSTB/SNX12/PPIA/NFKB1/HDAC6/SERPING1/NCKAP1L/KNG1/PFDN2/PPP2R5D/AIDA/NCL/DDX6/CLU/BIN1/PDCD4/SNTA1/NXN/CD44/ADAR/SERPINF1/FABP1/PPP2R1A/RPS7/PAK2/THY1/CALM3/DDX3X/PRKAA1/CCAR2/SORL1/MAP1A/TRIM21/SMARCC1/CR…
GO:0060716	BP	GO:0060716	labyrinthine layer blood vessel development	4	-0.772541312917149	-1.5015107666236	0.0891089108910891	0.708824580207217	0.686617400951468	257	tags=75%, list=8%, signal=69%	RBPJ/TMED2/PLG
GO:0002020	MF	GO:0002020	protease binding	41	-0.397864177200791	-1.42206874365232	0.0898876404494382	0.708824580207217	0.686617400951468	140	tags=20%, list=5%, signal=19%	PLG/COL1A1/PZP/ADRM1/COL1A2/COL3A1/FN1/CASP3
GO:0016188	BP	GO:0016188	synaptic vesicle maturation	10	0.582612574615985	1.40850503001992	0.090032154340836	0.708824580207217	0.686617400951468	779	tags=60%, list=25%, signal=45%	ATP6V0D1/ATP6V1D/ATP6V1E1/ATP6V1F/ATP6V1B2/ATP6AP1
GO:0019730	BP	GO:0019730	antimicrobial humoral response	21	-0.448170622970068	-1.38563815620688	0.0893854748603352	0.708824580207217	0.686617400951468	39	tags=19%, list=1%, signal=19%	F2/FGB/REG3G/FGA
GO:1900026	BP	GO:1900026	positive regulation of substrate adhesion-dependent cell spreading	21	-0.446320927401701	-1.37991933255907	0.0893854748603352	0.708824580207217	0.686617400951468	314	tags=27%, list=10%, signal=25%	APOA1/OLFM4/FGG/S100A10/FGB/FGA
GO:0052008	BP	GO:0052008	symbiont-mediated disruption of host cellular anatomical entity	3	0.818215356550634	1.35062237594661	0.0899470899470899	0.708824580207217	0.686617400951468	16	tags=33%, list=1%, signal=33%	CSNK2B
GO:0052111	BP	GO:0052111	symbiont-mediated disruption of host anatomical structure	3	0.818215356550634	1.35062237594661	0.0899470899470899	0.708824580207217	0.686617400951468	16	tags=33%, list=1%, signal=33%	CSNK2B
GO:0075342	BP	GO:0075342	symbiont-mediated disruption of host cell PML body	3	0.818215356550634	1.35062237594661	0.0899470899470899	0.708824580207217	0.686617400951468	16	tags=33%, list=1%, signal=33%	CSNK2B
GO:1902074	BP	GO:1902074	response to salt	3	0.817950138546658	1.35018458243931	0.0899470899470899	0.708824580207217	0.686617400951468	252	tags=33%, list=8%, signal=31%	HNRNPD
GO:0033032	BP	GO:0033032	regulation of myeloid cell apoptotic process	3	0.817086148682891	1.34875840040392	0.0899470899470899	0.708824580207217	0.686617400951468	81	tags=33%, list=3%, signal=32%	MIF
GO:0036396	CC	GO:0036396	RNA N6-methyladenosine methyltransferase complex	3	0.817052874274459	1.34870347457025	0.0899470899470899	0.708824580207217	0.686617400951468	268	tags=67%, list=9%, signal=61%	ZC3H13/VIRMA
GO:0036315	BP	GO:0036315	cellular response to sterol	3	0.814453125	1.34441208659541	0.0899470899470899	0.708824580207217	0.686617400951468	573	tags=100%, list=19%, signal=81%	DAG1/GPLD1/CES1
GO:0071397	BP	GO:0071397	cellular response to cholesterol	3	0.814453125	1.34441208659541	0.0899470899470899	0.708824580207217	0.686617400951468	573	tags=100%, list=19%, signal=81%	DAG1/GPLD1/CES1
GO:0009617	BP	GO:0009617	response to bacterium	138	-0.299277576017927	-1.3293708868562	0.0891089108910891	0.708824580207217	0.686617400951468	321	tags=17%, list=10%, signal=16%	MMP9/ALAD/CHGA/FCN2/EMILIN2/MAOB/CYBA/F2/CAV1/MS4A1/SHARPIN/MMRN2/S100A8/PLAA/HP/BPI/FGB/REG3G/CASP3/CD68/CFD/FGA/CDK4
GO:0009790	BP	GO:0009790	embryo development	174	-0.27964706489195	-1.27898248800456	0.0885245901639344	0.708824580207217	0.686617400951468	415	tags=23%, list=13%, signal=21%	MYO6/PLCG1/FUT8/ROCK2/CDC73/ITGA4/COL5A1/RPL13/PLOD3/MSH2/MMP9/YAP1/APOA1/UGDH/NES/MATR3/CNOT2/HMX2/KIAA1217/TMED2/SIN3A/PTK7/NHERF1/PRKDC/COL5A2/FKBP10/PLG/ITGB4/RRM2/COL1A1/MMP14/PHGDH/YBX1/MARCKS/COL4A2/COL3A1/FN1/CASP3/SUPT6H/COL2A1
GO:0048872	BP	GO:0048872	homeostasis of number of cells	70	0.334830381985694	1.27662192682666	0.0895295902883156	0.708824580207217	0.686617400951468	640	tags=33%, list=21%, signal=27%	MIF/ISG15/UBAP2L/RPS17/TCIRG1/GPI/STAT1/CD74/HMGB1/HSCB/MAPK14/DOCK10/CORO1A/ACIN1/WDR37/HDAC6/NCKAP1L/RAC2/TMOD3/HCLS1/INPP5D/ADAR/PPP2R1A
GO:0015980	BP	GO:0015980	energy derivation by oxidation of organic compounds	114	0.308778548693298	1.26860573588417	0.0891812865497076	0.708824580207217	0.686617400951468	1142	tags=46%, list=37%, signal=30%	NDUFB11/COX7A2L/NDUFS8/ATP5PO/ACADM/NDUFA9/PYGM/IDE/PTGES3/PPP1CB/AK4/NDUFS2/ATP5F1C/NDUFV1/PARK7/NDUFB5/PPP1CA/NDUFA6/COX7A2/UGP2/SOD2/PFKM/PYGL/CS/PYGB/COX5B/CDK1/ETFB/AGL/COX7C/IDH1/NDUFS1/ATP5F1A/FH/MDH2/ADSL/VCP/SLC25A12/COX4I1/CYCS/NNT/ACO2/DLAT/PPP1CC/NDUFS3/KHK/IDH2/PDHA1/ACO1/IDH3A/DLD/MTOR/ACADVL
GO:0003682	MF	GO:0003682	chromatin binding	125	0.301397579998225	1.25584820980983	0.0889212827988338	0.708824580207217	0.686617400951468	1096	tags=45%, list=36%, signal=30%	CSNK2B/H2AC21/SARNP/PCNA/STAG2/NPM3/H1-2/FMR1/RAN/NUP62/RBBP4/STAT1/H2AC18/HNRNPD/H1-3/ACSS2/MNT/SMARCD2/RUVBL2/H2AZ2/SSRP1/H1-10/NFKB1/H2AX/SAMD1/TFAM/HNRNPC/FABP1/TOP1/CDK1/PRKAA1/MACROH2A2/SMARCC1/GTF2B/MSH6/HDAC1/KDM1A/HCFC1/SMARCB1/SET/MCMBP/PELP1/NUP98/ACTN4/CHD3/UPF1/RCC1/SMARCA4/DDX5/NONO/POLR2A/DDX1/HNRNPU/CTBP1/DHX9/PARP2
GO:0015748	BP	GO:0015748	organophosphate ester transport	22	-0.44616120677833	-1.39847307597868	0.0903954802259887	0.710979713650591	0.688705014960509	447	tags=36%, list=15%, signal=31%	PITPNB/PRKCD/APOE/APOA1/APOA4/SLC4A1/TMEM30B/APOC3
GO:0003018	BP	GO:0003018	vascular process in circulatory system	52	-0.394420978945155	-1.47465290800519	0.0909090909090909	0.711493634570558	0.689202834951823	476	tags=47%, list=15%, signal=41%	RAP1GDS1/ITGA1/SLC2A3/ROCK1/AGT/CPS1/FABP5/CDH5/SLC12A2/SERPINF2/ROCK2/ITGA4/ABCC3/APOE/PLOD3/SLC4A4/TJP1/NHERF1/CAV1/HBB/ADRA2A/HBB/FGG/FGB/FGA
GO:0006692	BP	GO:0006692	prostanoid metabolic process	15	0.513414370359612	1.40001324499535	0.0909090909090909	0.711493634570558	0.689202834951823	298	tags=40%, list=10%, signal=36%	MIF/AKR1B1/ACOX1/PTGES3/CD74/MGST3
GO:0009209	BP	GO:0009209	pyrimidine ribonucleoside triphosphate biosynthetic process	7	0.633607479290997	1.36829783790891	0.0906095551894563	0.711493634570558	0.689202834951823	227	tags=29%, list=7%, signal=27%	NME2/NME1
GO:0050777	BP	GO:0050777	negative regulation of immune response	48	0.377670990571643	1.33791142928537	0.0907692307692308	0.711493634570558	0.689202834951823	1129	tags=56%, list=37%, signal=36%	OAS1/ISG15/SERPINB9/GPX1/PTPRC/FGL2/MAPK14/SERPING1/NCKAP1L/PSMB4/STAT6/INPP5D/ADAR/NLRX1/TRIM21/DHX58/GIGYF2/MKRN2/C4BPA/YWHAZ/ARG1/PSMA1/GRN/SAMHD1/LGALS9/USP15/TTLL12
GO:0070647	BP	GO:0070647	protein modification by small protein conjugation or removal	149	0.292560118024618	1.24643960702743	0.0907780979827089	0.711493634570558	0.689202834951823	937	tags=37%, list=30%, signal=27%	PRPF19/UBE2I/DNAJA1/HERC6/COPS5/ISG15/RPL11/WNK1/PDCD6/ELOC/WFS1/AIMP2/COPS6/CUL9/TRAF6/HSP90AB1/U2AF2/ELOB/ZFP91/DERL1/PARK7/BRCC3/DDA1/COPS2/OS9/FBXO6/UBE2V1/PPIA/HERC1/HDAC6/LNPEP/SUMO3/UHRF1/NPEPPS/UBA1/NXN/GPS1/RPS7/DDX3X/DCAF7/UBE4A/TRIM21/HSP90AA1/UFM1/KDM1A/PSMD14/NUB1/VPS18/UBE2D3/TRIM56/VCP/MKRN2/UBE2K/TRIP12/CUL3/USP9X
GO:0005520	MF	GO:0005520	insulin-like growth factor binding	4	-0.771217900588371	-1.49893858332788	0.0915841584158416	0.712400581698056	0.690081367803069	487	tags=75%, list=16%, signal=63%	ITGA6/IGFALS/ITGB4
GO:0045744	BP	GO:0045744	negative regulation of G protein-coupled receptor signaling pathway	8	0.621727458176726	1.38526107134296	0.0913539967373573	0.712400581698056	0.690081367803069	492	tags=25%, list=16%, signal=21%	STMN1/PADI2
GO:0042605	MF	GO:0042605	peptide antigen binding	3	0.813802083333333	1.34333741666208	0.091710758377425	0.712400581698056	0.690081367803069	575	tags=100%, list=19%, signal=81%	TAP2/TAPBP/TAP1
GO:0046977	MF	GO:0046977	TAP binding	3	0.813802083333333	1.34333741666208	0.091710758377425	0.712400581698056	0.690081367803069	575	tags=100%, list=19%, signal=81%	TAP2/TAPBP/TAP1
GO:0046978	MF	GO:0046978	TAP1 binding	3	0.813802083333333	1.34333741666208	0.091710758377425	0.712400581698056	0.690081367803069	575	tags=100%, list=19%, signal=81%	TAP2/TAPBP/TAP1
GO:0008537	CC	GO:0008537	proteasome activator complex	3	0.813615273976156	1.34302905176056	0.091710758377425	0.712400581698056	0.690081367803069	486	tags=67%, list=16%, signal=56%	PSME3/PSME2
GO:0061630	MF	GO:0061630	ubiquitin protein ligase activity	36	0.399680910632782	1.33068067928567	0.091743119266055	0.712400581698056	0.690081367803069	973	tags=47%, list=32%, signal=33%	PRPF19/HERC6/CUL9/TRAF6/FBXO6/UHRF1/UBE4A/TRIM21/VPS18/UBE2D3/TRIM56/MKRN2/UBE2K/TRIP12/CUL3/CDC42/TRIM25
GO:0015935	CC	GO:0015935	small ribosomal subunit	38	0.391266184008906	1.32012522183755	0.0913312693498452	0.712400581698056	0.690081367803069	659	tags=32%, list=21%, signal=25%	RPS10/RPS6/RPS23/RPS17/RPS26/RPS9/RPS16/RPS11/RPS15A/RPS7/RPS29/DDX3X
GO:0006221	BP	GO:0006221	pyrimidine nucleotide biosynthetic process	16	0.503607268219589	1.39266641533939	0.0920634920634921	0.714189514189514	0.691814253783694	1067	tags=56%, list=35%, signal=37%	NME2/TYMS/NME1/PRPS1/DUT/CMPK1/UMPS/SHMT1/UPP1
GO:0000338	BP	GO:0000338	protein deneddylation	6	0.665402159882147	1.35711947854249	0.0922570016474465	0.71499176276771	0.692591368247637	641	tags=67%, list=21%, signal=53%	COPS5/COPS6/COPS2/GPS1
GO:0004181	MF	GO:0004181	metallocarboxypeptidase activity	3	-0.825546971994005	-1.4759395543839	0.0942528735632184	0.71776782887894	0.695280461362333	494	tags=100%, list=16%, signal=84%	CPD/AEBP1
GO:2000644	BP	GO:2000644	regulation of receptor catabolic process	3	-0.821561052380713	-1.4688133984928	0.0942528735632184	0.71776782887894	0.695280461362333	377	tags=100%, list=12%, signal=88%	APOE/ANXA2
GO:0071827	BP	GO:0071827	plasma lipoprotein particle organization	9	-0.596434491063151	-1.46752152789779	0.0942408376963351	0.71776782887894	0.695280461362333	615	tags=67%, list=20%, signal=53%	AGT/APOB/APOE/APOA1/APOA4/APOC3
GO:0016079	BP	GO:0016079	synaptic vesicle exocytosis	15	-0.5149769400278	-1.45044651383227	0.0934065934065934	0.71776782887894	0.695280461362333	78	tags=20%, list=3%, signal=20%	RAB5A/SNAP23/PFN2
GO:0006497	BP	GO:0006497	protein lipidation	8	-0.608842916499782	-1.44480449277126	0.0951156812339332	0.71776782887894	0.695280461362333	109	tags=62%, list=4%, signal=60%	DPM1/ATG4B/PPM1B/PIGT/DPM3
GO:0015833	BP	GO:0015833	peptide transport	50	-0.387866189150946	-1.44442267079478	0.09375	0.71776782887894	0.695280461362333	333	tags=26%, list=11%, signal=24%	TARDBP/CHGA/F2/NHERF1/S100A8/ADRA2A/FGG/EIPR1/SLC25A22/CELA2A/FGB/ABCB8/FGA
GO:0070613	BP	GO:0070613	regulation of protein processing	18	-0.474763799731409	-1.41552214226305	0.094488188976378	0.71776782887894	0.695280461362333	410	tags=39%, list=13%, signal=34%	SERPINF2/CTSZ/ANXA2/MMP14/CLEC3B/GLG1/S100A10
GO:1903317	BP	GO:1903317	regulation of protein maturation	18	-0.474763799731409	-1.41552214226305	0.094488188976378	0.71776782887894	0.695280461362333	410	tags=39%, list=13%, signal=34%	SERPINF2/CTSZ/ANXA2/MMP14/CLEC3B/GLG1/S100A10
GO:0006661	BP	GO:0006661	phosphatidylinositol biosynthetic process	18	-0.472262501115405	-1.40806444734746	0.094488188976378	0.71776782887894	0.695280461362333	235	tags=56%, list=8%, signal=52%	PIK3R1/DPM1/SACM1L/PLCG2/SYNJ1/VAC14/PI4KA/PIGT/PIP4K2A/DPM3
GO:0001671	MF	GO:0001671	ATPase activator activity	11	0.563542580935275	1.39472739789865	0.0950080515297907	0.71776782887894	0.695280461362333	779	tags=64%, list=25%, signal=48%	DNAJA1/DNAJA2/HSCB/DNAJB1/DNAJB6/TOR1AIP1/ATP6AP1
GO:0002790	BP	GO:0002790	peptide secretion	44	-0.381503623554133	-1.3918090512277	0.0944444444444444	0.71776782887894	0.695280461362333	114	tags=25%, list=4%, signal=24%	TARDBP/CHGA/F2/S100A8/ADRA2A/FGG/EIPR1/SLC25A22/CELA2A/FGB/FGA
GO:0001101	BP	GO:0001101	response to acid chemical	30	-0.409034084745363	-1.39149304759937	0.0945945945945946	0.71776782887894	0.695280461362333	327	tags=27%, list=11%, signal=24%	AIFM1/ALAD/PPP1R9B/COL5A2/COL1A1/COL1A2/COL3A1/CASP3
GO:0090068	BP	GO:0090068	positive regulation of cell cycle process	48	-0.374982513023088	-1.39087087502138	0.09375	0.71776782887894	0.695280461362333	407	tags=23%, list=13%, signal=20%	RRM2B/ROCK2/NSFL1C/CDC73/BRD4/SIN3A/EIF4G1/RRM2/DDRGK1/PKP4/CDK4
GO:0009219	BP	GO:0009219	pyrimidine deoxyribonucleotide metabolic process	9	0.597291685618636	1.38601898729107	0.0935483870967742	0.71776782887894	0.695280461362333	1115	tags=78%, list=36%, signal=50%	TYMS/DCTPP1/DPYD/DUT/SHMT1/UPP1/NT5C
GO:0009650	BP	GO:0009650	UV protection	5	0.708053848898316	1.37926175222512	0.0945273631840796	0.71776782887894	0.695280461362333	164	tags=40%, list=5%, signal=38%	MFAP4/GPX1
GO:0006760	BP	GO:0006760	folic acid-containing compound metabolic process	8	0.61875630184965	1.37864108513736	0.0929853181076672	0.71776782887894	0.695280461362333	986	tags=75%, list=32%, signal=51%	TYMS/DHFR/GART/ATIC/MTHFD1/SHMT1
GO:0046653	BP	GO:0046653	tetrahydrofolate metabolic process	8	0.61875630184965	1.37864108513736	0.0929853181076672	0.71776782887894	0.695280461362333	986	tags=75%, list=32%, signal=51%	TYMS/DHFR/GART/ATIC/MTHFD1/SHMT1
GO:1901381	BP	GO:1901381	positive regulation of potassium ion transmembrane transport	5	0.707232407701091	1.37766161626541	0.0945273631840796	0.71776782887894	0.695280461362333	360	tags=33%, list=12%, signal=29%	FLNA/FLNA
GO:0006636	BP	GO:0006636	unsaturated fatty acid biosynthetic process	8	0.616517335165378	1.37365247904161	0.0946166394779772	0.71776782887894	0.695280461362333	257	tags=38%, list=8%, signal=34%	MIF/PTGES3/CD74
GO:0043501	BP	GO:0043501	skeletal muscle adaptation	5	0.703790254881479	1.37095643453835	0.0945273631840796	0.71776782887894	0.695280461362333	579	tags=60%, list=19%, signal=49%	RPS6KB1/ACTA1/CAMK2B
GO:0006278	BP	GO:0006278	RNA-templated DNA biosynthetic process	25	0.448722974359256	1.36914752503409	0.0947867298578199	0.71776782887894	0.695280461362333	1063	tags=58%, list=35%, signal=38%	PTGES3/HSP90AB1/CCT2/TEP1/CCT3/TCP1/HNRNPC/CCT5/CCT3/HSP90AA1/NEK7/CCT8/CCT6A/CCT7/HNRNPU
GO:0045069	BP	GO:0045069	regulation of viral genome replication	26	0.440078555703803	1.35497788769211	0.0940438871473354	0.71776782887894	0.695280461362333	797	tags=41%, list=26%, signal=30%	MX1/MX1/OAS1/ISG15/PPID/PPIA/OAS2/ADAR/DDX3X/PABPC1/LTF
GO:0046677	BP	GO:0046677	response to antibiotic	6	0.664184834120608	1.35463668452359	0.0939044481054366	0.71776782887894	0.695280461362333	752	tags=67%, list=24%, signal=50%	CYB5R4/PPP2CB/HSP90AA1/KDM1A
GO:0016010	CC	GO:0016010	dystrophin-associated glycoprotein complex	6	0.664098986321755	1.35446159383853	0.0939044481054366	0.71776782887894	0.695280461362333	603	tags=50%, list=20%, signal=40%	PGM5/DAG1/SNTA1
GO:1901623	BP	GO:1901623	regulation of lymphocyte chemotaxis	3	0.812395681212544	1.34101587850136	0.0952380952380952	0.71776782887894	0.695280461362333	492	tags=67%, list=16%, signal=56%	WNK1/PADI2
GO:0097255	CC	GO:0097255	R2TP complex	3	0.812057824357944	1.34045818055053	0.0952380952380952	0.71776782887894	0.695280461362333	355	tags=67%, list=12%, signal=59%	RPAP3/RUVBL2
GO:0070663	BP	GO:0070663	regulation of leukocyte proliferation	46	0.380875665892871	1.32687208144699	0.0941915227629513	0.71776782887894	0.695280461362333	572	tags=33%, list=19%, signal=27%	TFRC/MIF/PTPRC/SLC4A2/TRAF6/CD74/HMGB1/CORO1A/PNP/CD22/MYD88/NCKAP1L/RAC2/STAT6/INPP5D
GO:1903530	BP	GO:1903530	regulation of secretion by cell	112	-0.30937274849402	-1.325235457361	0.0952380952380952	0.71776782887894	0.695280461362333	413	tags=21%, list=13%, signal=19%	SLC12A2/LAMP1/APOE/TARDBP/CHGA/ANXA2/MAOB/SEC24A/MYO18A/F2/P3H1/LLGL2/ADRA2A/VAMP8/RAB5A/FGG/S100A10/EIPR1/SLC25A22/CELA2A/AP1G1/FGB/PFN2/FGA
GO:0009199	BP	GO:0009199	ribonucleoside triphosphate metabolic process	98	0.316644211185653	1.2780116222103	0.0948795180722892	0.71776782887894	0.695280461362333	993	tags=37%, list=32%, signal=26%	NME2/NDUFB11/NDUFS8/RAN/ATP5PO/GPI/NME1/NDUFA9/IMPDH2/AK4/NDUFS2/PRKACA/ATP5F1C/NDUFV1/PGK1/ENO1/NDUFB5/NDUFA6/PFKM/HSPA8/ATP1A2/ALDOA/PRKAA1/AK3/ATP6V1B2/FOXK1/NDUFS1/ATP5F1A/PKM/PFKP/VCP/ENO2/PFKL/ALDOC/LDHA/GAPDH/GIT1
GO:0030072	BP	GO:0030072	peptide hormone secretion	42	-0.376969786422617	-1.36204968284028	0.0956284153005464	0.717982122824159	0.695488041567386	333	tags=24%, list=11%, signal=22%	TARDBP/CHGA/F2/ADRA2A/FGG/EIPR1/SLC25A22/CELA2A/FGB/FGA
GO:0008266	MF	GO:0008266	poly(U) RNA binding	7	0.629690038822526	1.35983798618944	0.0955518945634267	0.717982122824159	0.695488041567386	722	tags=57%, list=23%, signal=44%	FMR1/SSB/HNRNPC/PABPC1
GO:0001516	BP	GO:0001516	prostaglandin biosynthetic process	6	0.663962832205517	1.354183901017	0.0955518945634267	0.717982122824159	0.695488041567386	257	tags=50%, list=8%, signal=46%	MIF/PTGES3/CD74
GO:0046457	BP	GO:0046457	prostanoid biosynthetic process	6	0.663962832205517	1.354183901017	0.0955518945634267	0.717982122824159	0.695488041567386	257	tags=50%, list=8%, signal=46%	MIF/PTGES3/CD74
GO:0140996	MF	GO:0140996	histone H3 kinase activity	3	-0.819013362805536	-1.46425855674078	0.096551724137931	0.72103940155668	0.69844953702892	21	tags=67%, list=1%, signal=66%	PRKCB/RPS6KA5
GO:0098909	BP	GO:0098909	regulation of cardiac muscle cell action potential involved in regulation of contraction	3	-0.817535896504175	-1.46161709474234	0.096551724137931	0.72103940155668	0.69844953702892	187	tags=67%, list=6%, signal=63%	ATP2A2/CAV1
GO:0002279	BP	GO:0002279	mast cell activation involved in immune response	15	-0.5052016863634	-1.42291424685622	0.0961538461538462	0.72103940155668	0.69844953702892	303	tags=20%, list=10%, signal=18%	CHGA/VAMP8/SNAP23
GO:0005923	CC	GO:0005923	bicellular tight junction	27	-0.42573978270215	-1.41616967070165	0.0966850828729282	0.72103940155668	0.69844953702892	611	tags=37%, list=20%, signal=30%	TBCD/STRN/CDH5/MICALL2/LSR/CGN/SYMPK/TJP1/CGNL1/CDK4
GO:0001704	BP	GO:0001704	formation of primary germ layer	27	-0.42416002386516	-1.4109148022518	0.0966850828729282	0.72103940155668	0.69844953702892	401	tags=33%, list=13%, signal=29%	CDC73/ITGA4/COL5A1/MMP9/COL5A2/ITGB4/MMP14/COL4A2/FN1
GO:0016859	MF	GO:0016859	cis-trans isomerase activity	14	-0.495551823180008	-1.40578880324235	0.0970350404312668	0.72103940155668	0.69844953702892	270	tags=33%, list=9%, signal=31%	PTPA/FKBP1A/FKBP10/GSTZ1/FKBP1A
GO:0010927	BP	GO:0010927	cellular component assembly involved in morphogenesis	25	0.44821513748254	1.36759800864512	0.0963665086887836	0.72103940155668	0.69844953702892	642	tags=41%, list=21%, signal=33%	TPM1/CSRP1/PGM5/DAG1/MYL9/LMOD1/ACTG1/TMOD3/ACTA1/WDR1/PAFAH1B1
GO:0042574	BP	GO:0042574	retinal metabolic process	4	0.742771661887573	1.35187142323043	0.096989966555184	0.72103940155668	0.69844953702892	188	tags=50%, list=6%, signal=47%	ALDH1A3/RDH11
GO:0000220	CC	GO:0000220	vacuolar proton-transporting V-type ATPase, V0 domain	3	0.808303679549673	1.33426123992847	0.0970017636684303	0.72103940155668	0.69844953702892	210	tags=67%, list=7%, signal=62%	TCIRG1/ATP6V0D1
GO:0033179	CC	GO:0033179	proton-transporting V-type ATPase, V0 domain	3	0.808303679549673	1.33426123992847	0.0970017636684303	0.72103940155668	0.69844953702892	210	tags=67%, list=7%, signal=62%	TCIRG1/ATP6V0D1
GO:0033189	BP	GO:0033189	response to vitamin A	3	0.806725419486345	1.33165601706199	0.0970017636684303	0.72103940155668	0.69844953702892	19	tags=33%, list=1%, signal=33%	TYMS
GO:1904776	BP	GO:1904776	regulation of protein localization to cell cortex	4	-0.765548681211332	-1.48791989242987	0.099009900990099	0.721454545454546	0.698851674641148	725	tags=100%, list=24%, signal=77%	EPB41L2/MISP/PPP1R9B
GO:0010829	BP	GO:0010829	negative regulation of glucose transmembrane transport	4	-0.764175376421875	-1.48525073818174	0.099009900990099	0.721454545454546	0.698851674641148	476	tags=75%, list=15%, signal=63%	STXBP3/FABP5/RSC1A1
GO:0090162	BP	GO:0090162	establishment of epithelial cell polarity	7	-0.64190661034728	-1.47960908672424	0.0987341772151899	0.721454545454546	0.698851674641148	261	tags=43%, list=8%, signal=39%	MYO18A/PTK7/NHERF1
GO:0032091	BP	GO:0032091	negative regulation of protein binding	17	-0.493286161898566	-1.44442010230679	0.0986666666666667	0.721454545454546	0.698851674641148	429	tags=35%, list=14%, signal=31%	PRKCD/ITGA4/PSME3IP1/NES/SYMPK/RALB
GO:0042472	BP	GO:0042472	inner ear morphogenesis	10	-0.56746904324464	-1.4420407974305	0.0973684210526316	0.721454545454546	0.698851674641148	437	tags=60%, list=14%, signal=52%	USH1C/MYO6/HMX2/PTK7/NHERF1/COL2A1
GO:0042886	BP	GO:0042886	amide transport	54	-0.378044456506178	-1.41523597245531	0.0974212034383954	0.721454545454546	0.698851674641148	333	tags=24%, list=11%, signal=22%	TARDBP/CHGA/F2/NHERF1/S100A8/ADRA2A/FGG/EIPR1/SLC25A22/CELA2A/FGB/ABCB8/FGA
GO:1903305	BP	GO:1903305	regulation of regulated secretory pathway	32	-0.407871500760056	-1.395323070225	0.0977653631284916	0.721454545454546	0.698851674641148	110	tags=16%, list=4%, signal=15%	ADRA2A/VAMP8/RAB5A/AP1G1/PFN2
GO:0060348	BP	GO:0060348	bone development	32	-0.406212072755393	-1.38964618872195	0.0977653631284916	0.721454545454546	0.698851674641148	381	tags=28%, list=12%, signal=25%	RPL13/ANXA2/P3H1/COL1A1/MMP14/GLG1/PRPSAP2/COL3A1/COL2A1
GO:0010811	BP	GO:0010811	positive regulation of cell-substrate adhesion	44	-0.37889598122878	-1.38229579901537	0.1	0.721454545454546	0.698851674641148	314	tags=20%, list=10%, signal=18%	APOA1/FBLN2/OLFM4/EFEMP2/FGG/S100A10/FGB/FN1/FGA
GO:0042982	BP	GO:0042982	amyloid precursor protein metabolic process	22	-0.439228712318394	-1.37674347083978	0.0988700564971751	0.721454545454546	0.698851674641148	809	tags=48%, list=26%, signal=36%	SPON1/NAGLU/RELA/PICALM/ROCK1/RTN1/ROCK2/APOE/FKBP1A/FKBP1A/CASP3
GO:0002548	BP	GO:0002548	monocyte chemotaxis	9	0.592772441748064	1.37553205441785	0.1	0.721454545454546	0.698851674641148	470	tags=33%, list=15%, signal=28%	CXCL12/HMGB1/S100A12
GO:0051393	MF	GO:0051393	alpha-actinin binding	9	0.59243711575211	1.37475392840586	0.1	0.721454545454546	0.698851674641148	423	tags=40%, list=14%, signal=35%	PDLIM7/DAG1/PDLIM3/SYNPO2
GO:0002199	CC	GO:0002199	zona pellucida receptor complex	5	0.701854544530541	1.36718574498615	0.0995024875621891	0.721454545454546	0.698851674641148	839	tags=83%, list=27%, signal=61%	CCT2/CCT3/TCP1/CCT3/CCT8
GO:0120178	BP	GO:0120178	steroid hormone biosynthetic process	5	0.700884707566667	1.36529653976222	0.0995024875621891	0.721454545454546	0.698851674641148	284	tags=40%, list=9%, signal=36%	AKR1B1/DHRS11
GO:0008168	MF	GO:0008168	methyltransferase activity	24	0.447756812172118	1.35870390489206	0.0987460815047022	0.721454545454546	0.698851674641148	800	tags=38%, list=26%, signal=28%	ASMTL/TYMS/MRM1/FBL/TRMT5/TRMT1/MGMT/MEPCE/NOP2
GO:0005732	CC	GO:0005732	sno(s)RNA-containing ribonucleoprotein complex	7	0.628609377872006	1.35750426051473	0.0988467874794069	0.721454545454546	0.698851674641148	838	tags=71%, list=27%, signal=52%	FBL/NOP58/NOP56/LSM6/SNU13
GO:0071867	BP	GO:0071867	response to monoamine	18	0.480515047382519	1.35738346761601	0.0998389694041868	0.721454545454546	0.698851674641148	393	tags=32%, list=13%, signal=28%	FLNA/TGM2/SULT1A3/GNB1/FLNA/FCSK
GO:0071869	BP	GO:0071869	response to catecholamine	18	0.480515047382519	1.35738346761601	0.0998389694041868	0.721454545454546	0.698851674641148	393	tags=32%, list=13%, signal=28%	FLNA/TGM2/SULT1A3/GNB1/FLNA/FCSK
GO:1903350	BP	GO:1903350	response to dopamine	18	0.480515047382519	1.35738346761601	0.0998389694041868	0.721454545454546	0.698851674641148	393	tags=32%, list=13%, signal=28%	FLNA/TGM2/SULT1A3/GNB1/FLNA/FCSK
GO:0008278	CC	GO:0008278	cohesin complex	4	0.740039981034807	1.34689966478604	0.0986622073578595	0.721454545454546	0.698851674641148	121	tags=25%, list=4%, signal=24%	STAG2
GO:0030892	CC	GO:0030892	mitotic cohesin complex	4	0.740039981034807	1.34689966478604	0.0986622073578595	0.721454545454546	0.698851674641148	121	tags=25%, list=4%, signal=24%	STAG2
GO:0061484	BP	GO:0061484	hematopoietic stem cell homeostasis	4	0.739134343126367	1.34525137087415	0.0986622073578595	0.721454545454546	0.698851674641148	634	tags=75%, list=21%, signal=60%	UBAP2L/TCIRG1/ADAR
GO:0090025	BP	GO:0090025	regulation of monocyte chemotaxis	4	0.738598832352094	1.34427672179999	0.0986622073578595	0.721454545454546	0.698851674641148	319	tags=50%, list=10%, signal=45%	CXCL12/HMGB1
GO:0090026	BP	GO:0090026	positive regulation of monocyte chemotaxis	4	0.738598832352094	1.34427672179999	0.0986622073578595	0.721454545454546	0.698851674641148	319	tags=50%, list=10%, signal=45%	CXCL12/HMGB1
GO:0051208	BP	GO:0051208	sequestering of calcium ion	27	0.431511220430104	1.34074147331843	0.1	0.721454545454546	0.698851674641148	680	tags=45%, list=22%, signal=35%	CLIC2/FLNA/PTPRC/CHERP/PRKACA/FLNA/DIAPH1/CORO1A/ATP1A2/HTT/THY1/CALM3/ERO1A
GO:0006694	BP	GO:0006694	steroid biosynthetic process	32	0.41048094273168	1.33096329097661	0.0993788819875776	0.721454545454546	0.698851674641148	723	tags=44%, list=24%, signal=34%	FDPS/CYB5R1/NPC1L1/OSBP/HSD17B10/AKR1B1/CYB5R3/DHRS11/NFKB1/CREB1/CES1/PRKAA1/SOD1/SF1
GO:0071897	BP	GO:0071897	DNA biosynthetic process	49	0.369120655682632	1.31429022571806	0.1	0.721454545454546	0.698851674641148	1063	tags=50%, list=35%, signal=33%	TYMS/PCNA/PTGES3/HNRNPD/HSP90AB1/CCT2/TEP1/CCT3/POLD2/RFC5/TCP1/HNRNPC/CCT5/CCT3/HSP90AA1/POLDIP2/PHB1/NEK7/CCT8/VCP/CCT6A/RFC2/CCT7/RGN/HNRNPU
GO:0065004	BP	GO:0065004	protein-DNA complex assembly	36	0.392437577688734	1.30656503366472	0.099388379204893	0.721454545454546	0.698851674641148	833	tags=44%, list=27%, signal=33%	TCF4/H1-2/RBBP4/MCM2/H1-3/HMGB1/SSRP1/H1-10/H2AX/H2BC4/PSMC6/MACROH2A2/GTF2B/H3C1/SMARCB1/SET
GO:0031329	BP	GO:0031329	regulation of cellular catabolic process	182	-0.271063718824534	-1.24678515232114	0.0996784565916399	0.721454545454546	0.698851674641148	435	tags=15%, list=14%, signal=14%	PLIN5/PRKCD/ROCK2/TOM1/APOE/MAGOHB/TARDBP/AIFM1/SLC4A4/APOA4/ANXA2/CNOT2/AKT2/DHX34/SLC4A1/QSOX1/EIF4G1/ADRA2A/APOC3/PIP4K2A/CHMP4B/YBX1/HP/SNX18/CASP3/RALB/ALKBH5
GO:0006325	BP	GO:0006325	chromatin organization	144	0.28889893828973	1.2257133209547	0.0985507246376812	0.721454545454546	0.698851674641148	833	tags=34%, list=27%, signal=26%	H2AC21/TGM2/NPM3/H1-2/BTAF1/GPX1/FBL/RBBP4/H2AC18/MCM2/H1-3/HMGB1/SMARCD2/BRCC3/RUVBL2/BAG6/RIOX2/H2AZ2/SSRP1/H1-10/MYD88/H2AX/HDAC6/SAMD1/SLFN11/PADI2/H2BC4/ZZEF1/UHRF1/DMAP1/HNRNPC/TOP1/CDK1/PRKAA1/MACROH2A2/SMARCC1/GTF2B/NAA50/TRRAP/SF3B1/PHB1/HDAC1/KDM1A/HCFC1/H3C1/SMARCB1/DDX21/SMCHD1/SET
GO:0048871	BP	GO:0048871	multicellular organismal-level homeostasis	158	0.284164245334182	1.22098939013215	0.0987124463519313	0.721454545454546	0.698851674641148	572	tags=27%, list=19%, signal=23%	YBX2/OAS1/TFRC/MIF/ISG15/UBAP2L/DOCK7/RPS17/GPX1/TCIRG1/WFS1/GPI/AKR1B1/SLC4A2/ACSL1/STAT1/CSK/TRAF6/CD74/ALDH1A1/RAB7A/PRKACA/HMGB1/HSCB/ACADL/MAPK14/DOCK10/CORO1A/ACIN1/WDR37/LCN2/HDAC6/SOD2/NCKAP1L/LNPEP/ACTG1/RAC2/LAMC1/TNS2/TMOD3/HCLS1/STAT6/INPP5D
GO:0006259	BP	GO:0006259	DNA metabolic process	213	0.268604851604936	1.20238748480054	0.0994397759103641	0.721454545454546	0.698851674641148	849	tags=33%, list=28%, signal=26%	S100A11/TYMS/PRPF19/TFRC/PCNA/CDK7/H1-2/FMR1/RAN/PTPRC/RBBP4/NME1/PTGES3/HNRNPD/MCM2/DCTPP1/HSP90AB1/H1-3/CCT2/HMGB1/TEP1/SMARCD2/PARK7/BRCC3/RUVBL2/MAP2K4/EXOSC4/FBXO6/UBE2V1/SSRP1/H1-10/CCT3/H2AX/SLFN11/POLD2/PDS5B/PLD3/RFC5/TCP1/PDS5A/UHRF1/DMAP1/STAT6/HNRNPC/MGMT/HSPD1/CCT5/MSH3/PPP2R1A/TOP1/CDK1/DUT/SMARCC1/MSH6/CCT3/TRRAP/HSP90AA1/POLDIP2/PHB1/MCM7/KDM1A/PSMD14/FH/SMARCB1/XAB2/NEK7/TDP2/SMC…
GO:0005652	CC	GO:0005652	nuclear lamina	6	0.66053156890856	1.34718567567741	0.100494233937397	0.724361708017423	0.701667757010192	88	tags=17%, list=3%, signal=16%	PCNA
GO:0021700	BP	GO:0021700	developmental maturation	51	0.366653926291708	1.31985895087262	0.100609756097561	0.724536319773361	0.701836898252448	797	tags=43%, list=26%, signal=32%	TYMS/BLOC1S3/SPINK1/AKR1B1/ATP6V0D1/PFN1/PRKACA/AGRN/DAG1/ATP6V1D/HDAC6/ATP6V1E1/RAC2/CAMK2B/ATP6V1F/PPP2R1A/ATP6V1B2/KDM1A/RAB32/ATP6AP1/WASHC5/LTF
GO:0045159	MF	GO:0045159	myosin II binding	4	-0.756856154395373	-1.47102510326443	0.101485148514851	0.725573097850326	0.702841194503519	203	tags=75%, list=7%, signal=70%	GSN/NHERF1/LLGL2
GO:0003180	BP	GO:0003180	aortic valve morphogenesis	4	-0.755819108868124	-1.469009502288	0.101485148514851	0.725573097850326	0.702841194503519	632	tags=100%, list=21%, signal=80%	EMILIN1/ROCK1/ROCK2
GO:0086069	BP	GO:0086069	bundle of His cell to Purkinje myocyte communication	4	-0.754802995766851	-1.46703458556037	0.101485148514851	0.725573097850326	0.702841194503519	758	tags=100%, list=25%, signal=75%	DSP/PKP2/DSG2
GO:0086073	BP	GO:0086073	bundle of His cell-Purkinje myocyte adhesion involved in cell communication	4	-0.754802995766851	-1.46703458556037	0.101485148514851	0.725573097850326	0.702841194503519	758	tags=100%, list=25%, signal=75%	DSP/PKP2/DSG2
GO:0086083	MF	GO:0086083	cell adhesive protein binding involved in bundle of His cell-Purkinje myocyte communication	4	-0.754802995766851	-1.46703458556037	0.101485148514851	0.725573097850326	0.702841194503519	758	tags=100%, list=25%, signal=75%	DSP/PKP2/DSG2
GO:0070071	BP	GO:0070071	proton-transporting two-sector ATPase complex assembly	4	-0.753193440800621	-1.46390625563049	0.101485148514851	0.725573097850326	0.702841194503519	227	tags=75%, list=7%, signal=70%	ATP5F1D/VMA21/ALDOB
GO:0016082	BP	GO:0016082	synaptic vesicle priming	3	-0.813716127719322	-1.45478798867155	0.101149425287356	0.725573097850326	0.702841194503519	37	tags=67%, list=1%, signal=66%	SYNJ1/SNAP23
GO:0016441	BP	GO:0016441	post-transcriptional gene silencing	21	0.46527373151603	1.36871901527967	0.100931677018634	0.725573097850326	0.702841194503519	634	tags=38%, list=21%, signal=30%	FMR1/RAN/ELOC/ELOB/LIMD1/XPO5/DDX6/ADAR
GO:0071682	CC	GO:0071682	endocytic vesicle lumen	15	-0.496785050945916	-1.39920856500797	0.101648351648352	0.726085795392726	0.703337829445177	496	tags=38%, list=16%, signal=32%	APOB/APOE/APOA1/HBB/HBB/HP
GO:0090666	BP	GO:0090666	scaRNA localization to Cajal body	4	0.73569705693341	1.33899538506296	0.102006688963211	0.727990183104353	0.705182553481946	499	tags=50%, list=16%, signal=42%	CCT2/TCP1
GO:0048145	BP	GO:0048145	regulation of fibroblast proliferation	16	-0.487075820003448	-1.40252886093946	0.102150537634409	0.728131168354543	0.705319121722892	401	tags=31%, list=13%, signal=27%	CDC73/FTH1/CAV1/FN1/CDK4
GO:0043200	BP	GO:0043200	response to amino acid	27	-0.420524001498621	-1.39882003261387	0.102209944751381	0.728131168354543	0.705319121722892	327	tags=30%, list=11%, signal=27%	AIFM1/ALAD/PPP1R9B/COL5A2/COL1A1/COL1A2/COL3A1/CASP3
GO:0043023	MF	GO:0043023	ribosomal large subunit binding	6	-0.663786133068245	-1.46760017521533	0.108860759493671	0.728281262745738	0.705464513719244	179	tags=67%, list=6%, signal=63%	NPM1/OLA1/RBM3/CPSF6
GO:0090049	BP	GO:0090049	regulation of cell migration involved in sprouting angiogenesis	6	-0.663322345711977	-1.46657476300587	0.111392405063291	0.728281262745738	0.705464513719244	572	tags=67%, list=19%, signal=54%	ANXA1/CIB1/PDCD10/MMRN2
GO:0038128	BP	GO:0038128	ERBB2 signaling pathway	7	-0.635784519282201	-1.4654975299594	0.106329113924051	0.728281262745738	0.705464513719244	274	tags=71%, list=9%, signal=65%	SRC/CUL5/MAP2K2/ERBB2/CPNE3
GO:0032373	BP	GO:0032373	positive regulation of sterol transport	6	-0.662579488007583	-1.46493233927506	0.113924050632911	0.728281262745738	0.705464513719244	377	tags=67%, list=12%, signal=59%	APOE/APOA1/ANXA2/CAV1
GO:0032376	BP	GO:0032376	positive regulation of cholesterol transport	6	-0.662579488007583	-1.46493233927506	0.113924050632911	0.728281262745738	0.705464513719244	377	tags=67%, list=12%, signal=59%	APOE/APOA1/ANXA2/CAV1
GO:0031264	CC	GO:0031264	death-inducing signaling complex	4	-0.750182546088705	-1.45805428273076	0.106435643564356	0.728281262745738	0.705464513719244	18	tags=75%, list=1%, signal=75%	FAF1/FADD/CASP3
GO:0007252	BP	GO:0007252	I-kappaB phosphorylation	4	-0.748193129137136	-1.45418765330637	0.106435643564356	0.728281262745738	0.705464513719244	16	tags=75%, list=1%, signal=75%	PLCG2/SIRPA/DDRGK1
GO:0048745	BP	GO:0048745	smooth muscle tissue development	4	-0.74792292395137	-1.4536624826924	0.106435643564356	0.728281262745738	0.705464513719244	117	tags=50%, list=4%, signal=48%	EFEMP2/COL3A1
GO:0034377	BP	GO:0034377	plasma lipoprotein particle assembly	7	-0.628396305054571	-1.44846753100059	0.113924050632911	0.728281262745738	0.705464513719244	496	tags=71%, list=16%, signal=60%	APOB/APOE/APOA1/APOA4/APOC3
GO:0072010	BP	GO:0072010	glomerular epithelium development	4	-0.744061259337723	-1.44615695399441	0.108910891089109	0.728281262745738	0.705464513719244	67	tags=50%, list=2%, signal=49%	ADIPOQ/PECAM1
GO:0006309	BP	GO:0006309	apoptotic DNA fragmentation	3	-0.805478587908211	-1.44006064879813	0.110344827586207	0.728281262745738	0.705464513719244	327	tags=100%, list=11%, signal=89%	AIFM1/EXOG
GO:0001991	BP	GO:0001991	regulation of systemic arterial blood pressure by circulatory renin-angiotensin	3	-0.804036458333333	-1.43748236294121	0.110344827586207	0.728281262745738	0.705464513719244	606	tags=100%, list=20%, signal=80%	ENPEP/CTSZ
GO:0015695	BP	GO:0015695	organic cation transport	3	-0.802734375	-1.43515445628058	0.110344827586207	0.728281262745738	0.705464513719244	610	tags=100%, list=20%, signal=80%	COMT/ADRA2A
GO:0002043	BP	GO:0002043	blood vessel endothelial cell proliferation involved in sprouting angiogenesis	3	-0.80190860593317	-1.43367811965787	0.114942528735632	0.728281262745738	0.705464513719244	546	tags=100%, list=18%, signal=82%	PDCD10/MMRN2
GO:0090051	BP	GO:0090051	negative regulation of cell migration involved in sprouting angiogenesis	3	-0.80190860593317	-1.43367811965787	0.114942528735632	0.728281262745738	0.705464513719244	546	tags=100%, list=18%, signal=82%	PDCD10/MMRN2
GO:1903587	BP	GO:1903587	regulation of blood vessel endothelial cell proliferation involved in sprouting angiogenesis	3	-0.80190860593317	-1.43367811965787	0.114942528735632	0.728281262745738	0.705464513719244	546	tags=100%, list=18%, signal=82%	PDCD10/MMRN2
GO:1903588	BP	GO:1903588	negative regulation of blood vessel endothelial cell proliferation involved in sprouting angiogenesis	3	-0.80190860593317	-1.43367811965787	0.114942528735632	0.728281262745738	0.705464513719244	546	tags=100%, list=18%, signal=82%	PDCD10/MMRN2
GO:0070293	BP	GO:0070293	renal absorption	5	-0.696415997613193	-1.43345568773906	0.120300751879699	0.728281262745738	0.705464513719244	203	tags=67%, list=7%, signal=62%	COMT/NHERF1/HBB/HBB
GO:0106140	MF	GO:0106140	P-TEFb complex binding	3	-0.801194602770368	-1.43240160173014	0.114942528735632	0.728281262745738	0.705464513719244	267	tags=100%, list=9%, signal=91%	BRD4/TAF7
GO:0003071	BP	GO:0003071	renal system process involved in regulation of systemic arterial blood pressure	3	-0.801106770833333	-1.43224457295479	0.114942528735632	0.728281262745738	0.705464513719244	615	tags=100%, list=20%, signal=80%	COMT/SERPINF2
GO:0007588	BP	GO:0007588	excretion	3	-0.801106770833333	-1.43224457295479	0.114942528735632	0.728281262745738	0.705464513719244	615	tags=100%, list=20%, signal=80%	COMT/NHERF1
GO:0097254	BP	GO:0097254	renal tubular secretion	3	-0.801106770833333	-1.43224457295479	0.114942528735632	0.728281262745738	0.705464513719244	615	tags=100%, list=20%, signal=80%	COMT/NHERF1
GO:0170014	CC	GO:0170014	ankyrin-1 complex	3	-0.800731798456896	-1.43157418522282	0.114942528735632	0.728281262745738	0.705464513719244	218	tags=67%, list=7%, signal=62%	SLC4A1/EPB42
GO:0032426	CC	GO:0032426	stereocilium tip	4	-0.736242352779415	-1.43096013256334	0.113861386138614	0.728281262745738	0.705464513719244	669	tags=100%, list=22%, signal=78%	EPS8L2/USH1C/NHERF1
GO:0019894	MF	GO:0019894	kinesin binding	4	-0.736152741043986	-1.43078596325574	0.113861386138614	0.728281262745738	0.705464513719244	40	tags=75%, list=1%, signal=74%	CROCC/KTN1/AP1G1
GO:0072697	BP	GO:0072697	protein localization to cell cortex	5	-0.694746881983022	-1.43002009277604	0.120300751879699	0.728281262745738	0.705464513719244	725	tags=80%, list=24%, signal=61%	NUMA1/EPB41L2/MISP/PPP1R9B
GO:0034374	BP	GO:0034374	low-density lipoprotein particle remodeling	5	-0.693401277382463	-1.42725039108233	0.120300751879699	0.728281262745738	0.705464513719244	615	tags=60%, list=20%, signal=48%	AGT/APOB/APOE
GO:0045472	BP	GO:0045472	response to ether	4	-0.73295068525945	-1.42456244982621	0.113861386138614	0.728281262745738	0.705464513719244	3	tags=50%, list=0%, signal=50%	ITGAM/CDK4
GO:0097484	BP	GO:0097484	dendrite extension	3	-0.795462916848506	-1.4221543084175	0.114942528735632	0.728281262745738	0.705464513719244	368	tags=67%, list=12%, signal=59%	CYFIP1/PLAA
GO:0099535	CC	GO:0099535	synapse-associated extracellular matrix	3	-0.793815477667695	-1.41920896341245	0.119540229885057	0.728281262745738	0.705464513719244	565	tags=100%, list=18%, signal=82%	VCAN/TNC
GO:1902751	BP	GO:1902751	positive regulation of cell cycle G2/M phase transition	9	-0.576669058552731	-1.41888886471034	0.107329842931937	0.728281262745738	0.705464513719244	407	tags=44%, list=13%, signal=39%	RRM2B/BRD4/SIN3A/CDK4
GO:1905332	BP	GO:1905332	positive regulation of morphogenesis of an epithelium	4	-0.729981543786401	-1.41879162849294	0.118811881188119	0.728281262745738	0.705464513719244	615	tags=50%, list=20%, signal=40%	AGT/MMRN2
GO:0004359	MF	GO:0004359	glutaminase activity	3	-0.793438262955066	-1.41853456675938	0.119540229885057	0.728281262745738	0.705464513719244	38	tags=67%, list=1%, signal=66%	CAD/GLS
GO:0110010	BP	GO:0110010	basolateral protein secretion	3	-0.792509404435723	-1.41687392348209	0.119540229885057	0.728281262745738	0.705464513719244	587	tags=67%, list=19%, signal=54%	AP1M2/AP1G1
GO:0004748	MF	GO:0004748	ribonucleoside-diphosphate reductase activity, thioredoxin disulfide as acceptor	3	-0.792317708333333	-1.41653120299551	0.119540229885057	0.728281262745738	0.705464513719244	642	tags=100%, list=21%, signal=79%	RRM2B/RRM2
GO:0005971	CC	GO:0005971	ribonucleoside-diphosphate reductase complex	3	-0.792317708333333	-1.41653120299551	0.119540229885057	0.728281262745738	0.705464513719244	642	tags=100%, list=21%, signal=79%	RRM2B/RRM2
GO:0016725	MF	GO:0016725	oxidoreductase activity, acting on CH or CH2 groups	3	-0.792317708333333	-1.41653120299551	0.119540229885057	0.728281262745738	0.705464513719244	642	tags=100%, list=21%, signal=79%	RRM2B/RRM2
GO:0016728	MF	GO:0016728	oxidoreductase activity, acting on CH or CH2 groups, disulfide as acceptor	3	-0.792317708333333	-1.41653120299551	0.119540229885057	0.728281262745738	0.705464513719244	642	tags=100%, list=21%, signal=79%	RRM2B/RRM2
GO:0061731	MF	GO:0061731	ribonucleoside-diphosphate reductase activity	3	-0.792317708333333	-1.41653120299551	0.119540229885057	0.728281262745738	0.705464513719244	642	tags=100%, list=21%, signal=79%	RRM2B/RRM2
GO:0060158	BP	GO:0060158	phospholipase C-activating dopamine receptor signaling pathway	3	-0.792307964830977	-1.41651378324713	0.119540229885057	0.728281262745738	0.705464513719244	380	tags=100%, list=12%, signal=88%	GNAQ/NHERF1
GO:0071425	BP	GO:0071425	hematopoietic stem cell proliferation	4	-0.728138492980774	-1.41520947620955	0.118811881188119	0.728281262745738	0.705464513719244	292	tags=75%, list=9%, signal=68%	EIF2AK2/BABAM1/XRCC5
GO:0032437	CC	GO:0032437	cuticular plate	3	-0.789294173301445	-1.41112562935886	0.119540229885057	0.728281262745738	0.705464513719244	357	tags=67%, list=12%, signal=59%	SPTBN1/SPTA1
GO:0018149	BP	GO:0018149	peptide cross-linking	10	-0.554409159245601	-1.40885328568775	0.107894736842105	0.728281262745738	0.705464513719244	128	tags=30%, list=4%, signal=29%	EPB42/COL3A1/FN1
GO:0032510	BP	GO:0032510	endosome to lysosome transport via multivesicular body sorting pathway	8	-0.59237793013285	-1.40573253244836	0.115681233933162	0.728281262745738	0.705464513719244	174	tags=50%, list=6%, signal=47%	CHMP6/CHMP4C/CHMP1A/CHMP4B
GO:0009084	BP	GO:0009084	glutamine family amino acid biosynthetic process	8	-0.592087861080108	-1.40504418893765	0.115681233933162	0.728281262745738	0.705464513719244	404	tags=25%, list=13%, signal=22%	PYCR3/GLS
GO:0005484	MF	GO:0005484	SNAP receptor activity	11	-0.532865028526789	-1.40337439986798	0.118110236220472	0.728281262745738	0.705464513719244	202	tags=36%, list=7%, signal=34%	SEC22B/STX7/VAMP8/SNAP23
GO:0071229	BP	GO:0071229	cellular response to acid chemical	16	-0.484183500271968	-1.39420046168031	0.104838709677419	0.728281262745738	0.705464513719244	165	tags=25%, list=5%, signal=24%	COL5A2/COL1A1/COL1A2/COL3A1
GO:0010971	BP	GO:0010971	positive regulation of G2/M transition of mitotic cell cycle	8	-0.585677553432842	-1.38983231566488	0.118251928020566	0.728281262745738	0.705464513719244	407	tags=50%, list=13%, signal=43%	RRM2B/BRD4/SIN3A/CDK4
GO:0004864	MF	GO:0004864	protein phosphatase inhibitor activity	8	-0.585656779540656	-1.38978301852773	0.118251928020566	0.728281262745738	0.705464513719244	211	tags=50%, list=7%, signal=47%	PPP1R14B/PPP1R9B/PPME1/PPP1R8
GO:0019212	MF	GO:0019212	phosphatase inhibitor activity	8	-0.585656779540656	-1.38978301852773	0.118251928020566	0.728281262745738	0.705464513719244	211	tags=50%, list=7%, signal=47%	PPP1R14B/PPP1R9B/PPME1/PPP1R8
GO:0071230	BP	GO:0071230	cellular response to amino acid stimulus	15	-0.493290144565467	-1.38936506643225	0.104395604395604	0.728281262745738	0.705464513719244	165	tags=27%, list=5%, signal=25%	COL5A2/COL1A1/COL1A2/COL3A1
GO:1990776	BP	GO:1990776	response to angiotensin	15	-0.492593673076177	-1.38740343559967	0.104395604395604	0.728281262745738	0.705464513719244	860	tags=67%, list=28%, signal=48%	CA2/RELA/RAP1GDS1/ROCK1/AGT/COMT/PRKCD/ROCK2/CAV1/COL3A1
GO:0071560	BP	GO:0071560	cellular response to transforming growth factor beta stimulus	52	-0.371069486556893	-1.38734683658701	0.107954545454545	0.728281262745738	0.705464513719244	475	tags=28%, list=15%, signal=24%	VASN/FBN1/CDH5/FUT8/LTBP2/SIN3A/CAV1/FKBP1A/COL1A1/CLEC3B/GLG1/COL1A2/COL4A2/COL3A1/FKBP1A
GO:0030159	MF	GO:0030159	signaling receptor complex adaptor activity	15	0.505905566545624	1.37953772775127	0.108150470219436	0.728281262745738	0.705464513719244	337	tags=19%, list=11%, signal=17%	NUP62/GNB1/GRB2
GO:0097194	BP	GO:0097194	execution phase of apoptosis	14	-0.485312922043223	-1.37674293578245	0.110512129380054	0.728281262745738	0.705464513719244	327	tags=29%, list=11%, signal=26%	AIFM1/SHARPIN/EXOG/CASP3
GO:0060840	BP	GO:0060840	artery development	15	-0.488678632404361	-1.37637661740148	0.10989010989011	0.728281262745738	0.705464513719244	894	tags=67%, list=29%, signal=48%	RBPJ/GAA/NAGLU/PDGFRB/COMT/APOB/APOE/FKBP10/EFEMP2/COL3A1
GO:0045214	BP	GO:0045214	sarcomere organization	9	0.590998043052838	1.37141455145937	0.104838709677419	0.728281262745738	0.705464513719244	1263	tags=90%, list=41%, signal=53%	TPM1/CSRP1/ACTG1/WDR1/FLNC/CFL2/PRKAR1A/ACTN2/ITGB1
GO:0016239	BP	GO:0016239	positive regulation of macroautophagy	24	-0.424541640711243	-1.3675513229567	0.10989010989011	0.728281262745738	0.705464513719244	80	tags=17%, list=3%, signal=16%	TOM1/PIP4K2A/SNX18/RALB
GO:0071949	MF	GO:0071949	FAD binding	15	0.501184289799948	1.36666342901942	0.117554858934169	0.728281262745738	0.705464513719244	362	tags=40%, list=12%, signal=35%	TXNRD1/CYB5R1/ACOX1/CYB5R3/COQ6/DAO
GO:0031234	CC	GO:0031234	extrinsic component of cytoplasmic side of plasma membrane	11	0.552105897675579	1.36642242854405	0.104669887278583	0.728281262745738	0.705464513719244	439	tags=36%, list=14%, signal=31%	GNB1/TRAF6/TGM3/MYD88
GO:0007080	BP	GO:0007080	mitotic metaphase chromosome alignment	19	-0.448445480109338	-1.36590190229704	0.109042553191489	0.728281262745738	0.705464513719244	526	tags=37%, list=17%, signal=31%	CHMP6/MAD1L1/KPNB1/MAPRE1/CHMP4C/CHMP1A/CHMP4B
GO:0002090	BP	GO:0002090	regulation of receptor internalization	16	-0.473871148434847	-1.36450617080867	0.112903225806452	0.728281262745738	0.705464513719244	446	tags=56%, list=15%, signal=48%	SCRIB/PLCG2/VAC14/HIP1/FLOT1/ARF1/ANXA2/TBC1D5/ANKRD13A
GO:0007605	BP	GO:0007605	sensory perception of sound	24	-0.423507165553178	-1.36421902822912	0.10989010989011	0.728281262745738	0.705464513719244	439	tags=42%, list=14%, signal=36%	MYH14/USH1C/MYO6/ALDH7A1/EML2/NDUFB9/NHERF1/COL1A1/CASP3/COL2A1
GO:0045116	BP	GO:0045116	protein neddylation	11	0.551116034304142	1.36397258782034	0.104669887278583	0.728281262745738	0.705464513719244	641	tags=45%, list=21%, signal=36%	COPS5/RPL11/COPS6/COPS2/GPS1
GO:0045920	BP	GO:0045920	negative regulation of exocytosis	10	0.563734849077385	1.36286686061724	0.115755627009646	0.728281262745738	0.705464513719244	466	tags=50%, list=15%, signal=43%	FMR1/RAP1B/RAB7A/VPS4B/NCKAP1L
GO:0030101	BP	GO:0030101	natural killer cell activation	13	0.519990125029879	1.36225655687754	0.106858054226475	0.728281262745738	0.705464513719244	387	tags=38%, list=13%, signal=34%	BLOC1S3/PTPRC/RAB27A/BAG6/CORO1A
GO:1904738	BP	GO:1904738	vascular associated smooth muscle cell migration	5	0.698444714892169	1.36054352757694	0.106135986733002	0.728281262745738	0.705464513719244	142	tags=33%, list=5%, signal=32%	TPM1/DOCK7
GO:1904752	BP	GO:1904752	regulation of vascular associated smooth muscle cell migration	5	0.698444714892169	1.36054352757694	0.106135986733002	0.728281262745738	0.705464513719244	142	tags=33%, list=5%, signal=32%	TPM1/DOCK7
GO:0048008	BP	GO:0048008	platelet-derived growth factor receptor signaling pathway	12	-0.502449307636594	-1.35904580976873	0.117493472584856	0.728281262745738	0.705464513719244	1132	tags=75%, list=37%, signal=48%	PTPN1/SRC/CBL/ADIPOQ/PTPN11/HGS/PDGFRB/HIP1/NHERF1
GO:0022038	BP	GO:0022038	corpus callosum development	5	0.697237222038849	1.35819137779164	0.107794361525705	0.728281262745738	0.705464513719244	642	tags=80%, list=21%, signal=63%	CORO1C/WDR37/HERC1/PAFAH1B1
GO:0090596	BP	GO:0090596	sensory organ morphogenesis	28	-0.407239170431899	-1.35706361405299	0.11142061281337	0.728281262745738	0.705464513719244	475	tags=54%, list=15%, signal=46%	NAGLU/MAN2A1/SCRIB/PRKRA/MFAP2/FBN1/USH1C/MYO6/COL5A1/HMX2/BAK1/PTK7/NHERF1/COL5A2/COL2A1
GO:0045930	BP	GO:0045930	negative regulation of mitotic cell cycle	35	-0.389490226917474	-1.35598618276013	0.106017191977077	0.728281262745738	0.705464513719244	504	tags=56%, list=16%, signal=47%	BRCC3/DYNC1LI1/CRLF3/KANK2/ZFYVE19/ZNF207/SCRIB/RAD50/TOM1L2/SDE2/MAD1L1/CDC73/MSH2/BABAM1/NHERF1/TRIP13/PRKDC/CHMP4C/USP47/RPS27L
GO:0110096	BP	GO:0110096	cellular response to aldehyde	5	0.695474493638037	1.35475765044649	0.111111111111111	0.728281262745738	0.705464513719244	343	tags=60%, list=11%, signal=53%	RDH11/ALDH1A1/PARK7
GO:0038095	BP	GO:0038095	Fc-epsilon receptor signaling pathway	8	0.607639199395783	1.35387124579227	0.102773246329527	0.728281262745738	0.705464513719244	384	tags=38%, list=12%, signal=33%	IKBKB/TRAF6/MAP2K4
GO:0050681	MF	GO:0050681	nuclear androgen receptor binding	9	0.583335748622227	1.35363415065563	0.114516129032258	0.728281262745738	0.705464513719244	1143	tags=67%, list=37%, signal=42%	PARK7/SNW1/KDM1A/SMARCA4/DDX5/PKN1
GO:0006612	BP	GO:0006612	protein targeting to membrane	25	-0.413421058988676	-1.35344276527268	0.113821138211382	0.728281262745738	0.705464513719244	658	tags=40%, list=21%, signal=32%	SRP68/PDZK1/CIB1/GDI1/AKT2/ERBB2/SRPRB/SEC61A1/VPS37C/CHMP4B
GO:0009988	BP	GO:0009988	cell-cell recognition	18	0.478695082685887	1.35224233831255	0.104669887278583	0.728281262745738	0.705464513719244	1054	tags=55%, list=34%, signal=36%	UBAP2L/CCT2/CCT3/TCP1/VDAC2/ALDOA/CCT5/CCT3/CCT8/CCT7/ALDOA
GO:0006354	BP	GO:0006354	DNA-templated transcription elongation	29	-0.401710720853082	-1.35165853417243	0.109289617486339	0.728281262745738	0.705464513719244	401	tags=48%, list=13%, signal=42%	HEXIM1/CTR9/CCNK/INTS11/TCERG1/SUPT5H/ZC3H4/CDC73/POLR2E/SUPT16H/BRD4/ADRM1/ZNF326/SUPT6H
GO:0019677	BP	GO:0019677	NAD catabolic process	13	0.515528535671567	1.35056820153212	0.114832535885167	0.728281262745738	0.705464513719244	908	tags=62%, list=30%, signal=44%	PGK1/ENO1/PFKM/FOXK1/PKM/PFKP/ENO2/PFKL
GO:0006334	BP	GO:0006334	nucleosome assembly	25	0.44258618970552	1.35042291319016	0.107424960505529	0.728281262745738	0.705464513719244	833	tags=44%, list=27%, signal=32%	H1-2/RBBP4/MCM2/H1-3/SSRP1/H1-10/H2AX/H2BC4/MACROH2A2/H3C1/SET
GO:0051452	BP	GO:0051452	intracellular pH reduction	16	0.488284760317808	1.35029382959609	0.112698412698413	0.728281262745738	0.705464513719244	779	tags=50%, list=25%, signal=38%	TCIRG1/ATP6V0D1/RAB7A/ATP6V1D/CLIC4/ATP6V1F/ATP6V1B2/ATP6AP1
GO:0048144	BP	GO:0048144	fibroblast proliferation	23	-0.421490411178079	-1.34980173940297	0.110803324099723	0.728281262745738	0.705464513719244	187	tags=26%, list=6%, signal=25%	CDC73/FTH1/CAV1/COL3A1/FN1/CDK4
GO:0034138	BP	GO:0034138	toll-like receptor 3 signaling pathway	11	0.545320689121884	1.34962952488345	0.111111111111111	0.728281262745738	0.705464513719244	267	tags=36%, list=9%, signal=33%	IKBKB/OAS1/TRAF6/WDFY1
GO:0051539	MF	GO:0051539	4 iron, 4 sulfur cluster binding	17	0.483413961601975	1.34918593553961	0.113237639553429	0.728281262745738	0.705464513719244	323	tags=28%, list=11%, signal=25%	NDUFS8/NDUFS2/NUBP2/DPYD/NDUFV1
GO:0005885	CC	GO:0005885	Arp2/3 protein complex	8	0.605097440028316	1.34820799212996	0.109298531810767	0.728281262745738	0.705464513719244	901	tags=75%, list=29%, signal=53%	ARPC2/ARPC5L/ARPC1A/ARPC1B/ARPC5/ACTR3
GO:0031100	BP	GO:0031100	animal organ regeneration	16	0.487378628309	1.34778802855594	0.114285714285714	0.728281262745738	0.705464513719244	834	tags=38%, list=27%, signal=27%	TYMS/PCNA/CXCL12/ATIC/CDK1/LCP1
GO:1902562	CC	GO:1902562	H4 histone acetyltransferase complex	8	0.604187941200851	1.34618155224292	0.109298531810767	0.728281262745738	0.705464513719244	783	tags=62%, list=25%, signal=47%	RUVBL2/ACTG1/DMAP1/TRRAP/HCFC1
GO:0007431	BP	GO:0007431	salivary gland development	5	0.69057265119658	1.34520904929778	0.112769485903814	0.728281262745738	0.705464513719244	400	tags=40%, list=13%, signal=35%	TGM2/DAG1
GO:0007435	BP	GO:0007435	salivary gland morphogenesis	5	0.69057265119658	1.34520904929778	0.112769485903814	0.728281262745738	0.705464513719244	400	tags=40%, list=13%, signal=35%	TGM2/DAG1
GO:0035272	BP	GO:0035272	exocrine system development	5	0.69057265119658	1.34520904929778	0.112769485903814	0.728281262745738	0.705464513719244	400	tags=40%, list=13%, signal=35%	TGM2/DAG1
GO:1903146	BP	GO:1903146	regulation of autophagy of mitochondrion	13	0.51300697825405	1.34396229122689	0.119617224880383	0.728281262745738	0.705464513719244	1216	tags=62%, list=40%, signal=37%	SLC25A4/PARK7/HDAC6/HTT/SLC25A5/TSC2/VPS13D/HTRA2
GO:0042824	CC	GO:0042824	MHC class I peptide loading complex	5	0.688505359885892	1.34118204508055	0.117744610281924	0.728281262745738	0.705464513719244	575	tags=60%, list=19%, signal=49%	TAP2/TAPBP/TAP1
GO:0004175	MF	GO:0004175	endopeptidase activity	69	-0.344357524990673	-1.34112379978661	0.104956268221574	0.728281262745738	0.705464513719244	421	tags=23%, list=14%, signal=20%	C2/PSMB7/CTSZ/MMP9/CLCA4/MME/F2/CPNE1/PITRM1/CLCA1/PLG/MMP14/HP/CELA2A/CASP3/CFD
GO:1901681	MF	GO:1901681	sulfur compound binding	60	-0.349584128836173	-1.33986589916171	0.115819209039548	0.728281262745738	0.705464513719244	384	tags=31%, list=12%, signal=28%	AAMP/TPK1/APOB/FBN1/COL5A1/APOE/LTBP2/ILVBL/F2/GNS/CFH/TNXB/PC/EFEMP2/CLEC3B/SERPIND1/COL28A1/ACBD3/FN1
GO:0090022	BP	GO:0090022	regulation of neutrophil chemotaxis	6	0.65692407316732	1.33982801585246	0.105436573311367	0.728281262745738	0.705464513719244	496	tags=50%, list=16%, signal=42%	CD74/NCKAP1L/RAC2
GO:0006402	BP	GO:0006402	mRNA catabolic process	73	-0.338011745479166	-1.33858504662974	0.10632183908046	0.728281262745738	0.705464513719244	62	tags=3%, list=2%, signal=3%	YBX1/ALKBH5
GO:0031397	BP	GO:0031397	negative regulation of protein ubiquitination	23	0.445559168384891	1.33823424497407	0.104524180967239	0.728281262745738	0.705464513719244	643	tags=39%, list=21%, signal=31%	DNAJA1/ISG15/RPL11/WNK1/U2AF2/PARK7/PPIA/NXN/RPS7
GO:0098927	BP	GO:0098927	vesicle-mediated transport between endosomal compartments	21	0.454669577462331	1.33752424473683	0.111801242236025	0.728281262745738	0.705464513719244	690	tags=45%, list=22%, signal=36%	FLNA/SNF8/RAB7A/SNX3/FLNA/CORO1A/SNX12/WDR81/DNAJC13/SORL1
GO:0008379	MF	GO:0008379	thioredoxin peroxidase activity	5	0.686436524570087	1.33715203320055	0.117744610281924	0.728281262745738	0.705464513719244	89	tags=20%, list=3%, signal=19%	PRDX5
GO:0140824	MF	GO:0140824	thioredoxin-dependent peroxiredoxin activity	5	0.686436524570087	1.33715203320055	0.117744610281924	0.728281262745738	0.705464513719244	89	tags=20%, list=3%, signal=19%	PRDX5
GO:0140658	MF	GO:0140658	ATP-dependent chromatin remodeler activity	6	0.655598856735584	1.33712517365984	0.108731466227348	0.728281262745738	0.705464513719244	985	tags=67%, list=32%, signal=45%	BTAF1/MYD88/CHD3/SMARCA4
GO:0002526	BP	GO:0002526	acute inflammatory response	23	-0.417435365431863	-1.33681566034532	0.113573407202216	0.728281262745738	0.705464513719244	243	tags=29%, list=8%, signal=27%	F2/ITIH4/CD163/ITIH4/HP/FN1/REG3G
GO:0042776	BP	GO:0042776	proton motive force-driven mitochondrial ATP synthesis	33	0.407437982109101	1.33450789905959	0.10355486862442	0.728281262745738	0.705464513719244	381	tags=27%, list=12%, signal=24%	NDUFB11/NDUFS8/ATP5PO/NDUFA9/NDUFS2/ATP5F1C/NDUFV1/NDUFB5/NDUFA6
GO:0019908	CC	GO:0019908	nuclear cyclin-dependent protein kinase holoenzyme complex	4	0.732352649085859	1.33290844121639	0.107023411371237	0.728281262745738	0.705464513719244	386	tags=50%, list=13%, signal=44%	CDK7/SNW1
GO:0031664	BP	GO:0031664	regulation of lipopolysaccharide-mediated signaling pathway	4	0.732321583172971	1.33285190012574	0.107023411371237	0.728281262745738	0.705464513719244	797	tags=75%, list=26%, signal=56%	MIF/TRAF6/LTF
GO:0051282	BP	GO:0051282	regulation of sequestering of calcium ion	26	0.432704424678778	1.3322733401736	0.114420062695925	0.728281262745738	0.705464513719244	680	tags=46%, list=22%, signal=36%	CLIC2/FLNA/PTPRC/CHERP/PRKACA/FLNA/DIAPH1/CORO1A/ATP1A2/HTT/THY1/CALM3/ERO1A
GO:0051283	BP	GO:0051283	negative regulation of sequestering of calcium ion	26	0.432704424678778	1.3322733401736	0.114420062695925	0.728281262745738	0.705464513719244	680	tags=46%, list=22%, signal=36%	CLIC2/FLNA/PTPRC/CHERP/PRKACA/FLNA/DIAPH1/CORO1A/ATP1A2/HTT/THY1/CALM3/ERO1A
GO:0046580	BP	GO:0046580	negative regulation of Ras protein signal transduction	4	0.731853591451944	1.3320001381827	0.107023411371237	0.728281262745738	0.705464513719244	380	tags=50%, list=12%, signal=44%	NUP62/PPP2CB
GO:0007043	BP	GO:0007043	cell-cell junction assembly	37	-0.376809218785712	-1.33181853493844	0.115819209039548	0.728281262745738	0.705464513719244	624	tags=43%, list=20%, signal=35%	CD9/ROCK1/AGT/TBCD/STRN/CDH17/CDH5/MICALL2/AFDN/ROCK2/PKP2/LSR/TJP1/CAV1/PECAM1/PKP4
GO:0030672	CC	GO:0030672	synaptic vesicle membrane	24	0.438728670743565	1.33130829486574	0.119122257053292	0.728281262745738	0.705464513719244	810	tags=48%, list=26%, signal=36%	WFS1/ATP6V0D1/RAB7A/SYNGR2/RAB5B/ATP6V1D/ATP6V1E1/BIN1/ATP6V1F/ATP6V1B2/ATP6AP1/CLTB
GO:0099501	CC	GO:0099501	exocytic vesicle membrane	24	0.438728670743565	1.33130829486574	0.119122257053292	0.728281262745738	0.705464513719244	810	tags=48%, list=26%, signal=36%	WFS1/ATP6V0D1/RAB7A/SYNGR2/RAB5B/ATP6V1D/ATP6V1E1/BIN1/ATP6V1F/ATP6V1B2/ATP6AP1/CLTB
GO:1990062	CC	GO:1990062	RPAP3/R2TP/prefoldin-like complex	6	0.65271099977328	1.33123525148784	0.112026359143328	0.728281262745738	0.705464513719244	508	tags=67%, list=17%, signal=56%	PFDN6/RPAP3/RUVBL2/PFDN2
GO:0030371	MF	GO:0030371	translation repressor activity	6	0.651791443511429	1.32935977258228	0.115321252059308	0.728281262745738	0.705464513719244	335	tags=50%, list=11%, signal=45%	TYMS/FMR1/DHFR
GO:0120293	CC	GO:0120293	dynein axonemal particle	4	0.730222498735384	1.32903149015088	0.112040133779264	0.728281262745738	0.705464513719244	649	tags=75%, list=21%, signal=59%	HSP90AB1/RUVBL2/STIP1
GO:1990071	CC	GO:1990071	TRAPPII protein complex	4	0.729809787861768	1.3282803413595	0.112040133779264	0.728281262745738	0.705464513719244	489	tags=50%, list=16%, signal=42%	TRAPPC3/TRAPPC4
GO:0006690	BP	GO:0006690	icosanoid metabolic process	27	0.42740864544028	1.32799442949701	0.1140625	0.728281262745738	0.705464513719244	298	tags=30%, list=10%, signal=27%	MIF/GPX1/AKR1B1/ACOX1/PTGES3/CD74/LTA4H/MGST3
GO:0070166	BP	GO:0070166	enamel mineralization	4	0.729439124191102	1.32760572000584	0.112040133779264	0.728281262745738	0.705464513719244	196	tags=50%, list=6%, signal=47%	TCIRG1/SLC4A2
GO:0097186	BP	GO:0097186	amelogenesis	4	0.729439124191102	1.32760572000584	0.112040133779264	0.728281262745738	0.705464513719244	196	tags=50%, list=6%, signal=47%	TCIRG1/SLC4A2
GO:0031428	CC	GO:0031428	box C/D RNP complex	4	0.728427222403126	1.32576402197066	0.112040133779264	0.728281262745738	0.705464513719244	838	tags=100%, list=27%, signal=73%	FBL/NOP58/NOP56/SNU13
GO:0000910	BP	GO:0000910	cytokinesis	56	-0.348157925246937	-1.32540443196226	0.116343490304709	0.728281262745738	0.705464513719244	573	tags=29%, list=19%, signal=24%	SH3GLB1/EXOC5/CHMP6/RHOB/SEPTIN1/EXOC2/ROCK2/ARF1/PRPF40A/SEPTIN8/CHMP4C/CHMP1A/CHMP4B/SEPTIN11/SNX18/PKP4
GO:0030326	BP	GO:0030326	embryonic limb morphogenesis	4	0.727240167640169	1.32360353915449	0.117056856187291	0.728281262745738	0.705464513719244	787	tags=75%, list=26%, signal=56%	TMEM231/HDAC1/LNPK
GO:0035113	BP	GO:0035113	embryonic appendage morphogenesis	4	0.727240167640169	1.32360353915449	0.117056856187291	0.728281262745738	0.705464513719244	787	tags=75%, list=26%, signal=56%	TMEM231/HDAC1/LNPK
GO:0042733	BP	GO:0042733	embryonic digit morphogenesis	4	0.727240167640169	1.32360353915449	0.117056856187291	0.728281262745738	0.705464513719244	787	tags=75%, list=26%, signal=56%	TMEM231/HDAC1/LNPK
GO:0015986	BP	GO:0015986	proton motive force-driven ATP synthesis	34	0.402709980815191	1.32352669730628	0.104361370716511	0.728281262745738	0.705464513719244	381	tags=26%, list=12%, signal=23%	NDUFB11/NDUFS8/ATP5PO/NDUFA9/NDUFS2/ATP5F1C/NDUFV1/NDUFB5/NDUFA6
GO:2001046	BP	GO:2001046	positive regulation of integrin-mediated signaling pathway	6	0.648433533369634	1.3225111545053	0.118616144975288	0.728281262745738	0.705464513719244	714	tags=57%, list=23%, signal=44%	FLNA/FLNA/LAMC1/NID1
GO:0050679	BP	GO:0050679	positive regulation of epithelial cell proliferation	33	0.403758163599853	1.32245515217949	0.1112828438949	0.728281262745738	0.705464513719244	505	tags=30%, list=16%, signal=26%	NME2/SPINK1/PDCD6/CXCL12/SRSF6/NME1/HMGB1/STAT5A/HDAC6/LAMC1
GO:0042445	BP	GO:0042445	hormone metabolic process	31	0.411264730905249	1.32171179064311	0.115085536547434	0.728281262745738	0.705464513719244	284	tags=23%, list=9%, signal=21%	ALDH1A3/RDH11/HSD17B10/AKR1B1/IDE/ALDH1A1/DHRS11
GO:0033559	BP	GO:0033559	unsaturated fatty acid metabolic process	21	0.449291269837206	1.32170260810038	0.119565217391304	0.728281262745738	0.705464513719244	298	tags=33%, list=10%, signal=30%	MIF/GPX1/AKR1B1/ACOX1/PTGES3/CD74/MGST3
GO:0016479	BP	GO:0016479	negative regulation of transcription by RNA polymerase I	4	0.725863625584164	1.32109818257739	0.117056856187291	0.728281262745738	0.705464513719244	821	tags=80%, list=27%, signal=59%	FLNA/FLNA/MACROH2A2/DDX21
GO:0030043	BP	GO:0030043	actin filament fragmentation	4	0.725838278690796	1.32105205031014	0.117056856187291	0.728281262745738	0.705464513719244	556	tags=75%, list=18%, signal=62%	DSTN/CFL1/WDR1
GO:0034394	BP	GO:0034394	protein localization to cell surface	20	0.456037754619765	1.32061084071634	0.11993769470405	0.728281262745738	0.705464513719244	1213	tags=57%, list=39%, signal=35%	FLNA/FCN1/HSP90AB1/FLNA/CD177/MAP1A/ASTN2/VCL/GPD1L/AP3B1/ACTN2/STX4
GO:0035458	BP	GO:0035458	cellular response to interferon-beta	6	0.647190413827675	1.31997575283957	0.118616144975288	0.728281262745738	0.705464513719244	228	tags=33%, list=7%, signal=31%	OAS1/STAT1
GO:0036037	BP	GO:0036037	CD8-positive, alpha-beta T cell activation	4	0.72479965636263	1.31916171992057	0.118729096989967	0.728281262745738	0.705464513719244	694	tags=75%, list=23%, signal=58%	SLC4A2/NCKAP1L/WDFY4
GO:0002138	BP	GO:0002138	retinoic acid biosynthetic process	3	0.798790274993764	1.31855752945448	0.104056437389771	0.728281262745738	0.705464513719244	79	tags=33%, list=3%, signal=33%	ALDH1A3
GO:0016102	BP	GO:0016102	diterpenoid biosynthetic process	3	0.798790274993764	1.31855752945448	0.104056437389771	0.728281262745738	0.705464513719244	79	tags=33%, list=3%, signal=33%	ALDH1A3
GO:0046486	BP	GO:0046486	glycerolipid metabolic process	73	-0.332657607862653	-1.31738173447589	0.109195402298851	0.728281262745738	0.705464513719244	731	tags=43%, list=24%, signal=34%	SACM1L/PDGFRB/PLCG2/PLSCR1/PGP/SYNJ1/C3/TMX1/PCK2/CPS1/APOBR/APOB/FABP5/VAC14/PLIN5/PLCG1/APOE/APOA1/PCYT1A/APOA4/PCYT2/PI4KA/DGKZ/CAV1/TNXB/ABHD12/GK/PIGT/APOC3/PIP4K2A/CDS2/DPM3
GO:0000814	CC	GO:0000814	ESCRT II complex	3	0.797981154751697	1.31722192032051	0.105820105820106	0.728281262745738	0.705464513719244	48	tags=33%, list=2%, signal=33%	SNF8
GO:0006754	BP	GO:0006754	ATP biosynthetic process	39	0.388224628061426	1.31699391615362	0.103715170278638	0.728281262745738	0.705464513719244	381	tags=25%, list=12%, signal=22%	NDUFB11/NDUFS8/ATP5PO/NDUFA9/NDUFS2/ATP5F1C/NDUFV1/ENO1/NDUFB5/NDUFA6
GO:0097050	BP	GO:0097050	type B pancreatic cell apoptotic process	4	0.723484918982666	1.31676885010038	0.120401337792642	0.728281262745738	0.705464513719244	211	tags=50%, list=7%, signal=47%	WFS1/SRSF6
GO:2000674	BP	GO:2000674	regulation of type B pancreatic cell apoptotic process	4	0.723484918982666	1.31676885010038	0.120401337792642	0.728281262745738	0.705464513719244	211	tags=50%, list=7%, signal=47%	WFS1/SRSF6
GO:0070585	BP	GO:0070585	protein localization to mitochondrion	42	0.386118364197501	1.31650079909369	0.10377358490566	0.728281262745738	0.705464513719244	728	tags=38%, list=24%, signal=29%	DNAJA1/TOMM40/ISG15/BCS1L/PDCD5/TIMM8B/RAC2/TOMM7/NPEPPS/GRPEL1/HSPD1/PRKAA1/TIMM9/TIMM8A/SAMM50/HSP90AA1
GO:0006120	BP	GO:0006120	mitochondrial electron transport, NADH to ubiquinone	21	0.447474017700531	1.31635670656642	0.119565217391304	0.728281262745738	0.705464513719244	381	tags=33%, list=12%, signal=29%	NDUFS8/NDUFA9/NDUFS2/NDUFV1/PARK7/NDUFB5/NDUFA6
GO:0003714	MF	GO:0003714	transcription corepressor activity	43	0.383300398169027	1.31512699014626	0.107424960505529	0.728281262745738	0.705464513719244	1075	tags=53%, list=35%, signal=35%	HIF1AN/SRSF2/HMGB1/ENO1/RUVBL2/COPS2/LIMD1/SNW1/RIOX2/DDX54/ELANE/DMAP1/DNAJB1/SF1/PHB1/HDAC1/TDP2/IRF2BP2/HDGF/PA2G4/SMARCA4/HNRNPU/CTBP1
GO:0046328	BP	GO:0046328	regulation of JNK cascade	21	0.446947236858746	1.31480704900744	0.119565217391304	0.728281262745738	0.705464513719244	1202	tags=71%, list=39%, signal=44%	DNAJA1/COPS5/HMGB1/MAP2K4/MYD88/AIDA/PDCD4/PAFAH1B1/MINK1/NCF1/CDC42/GSTP1/ZNF622/PRMT1/PYCARD
GO:0008654	BP	GO:0008654	phospholipid biosynthetic process	43	-0.361700420817695	-1.31467176455966	0.111111111111111	0.728281262745738	0.705464513719244	476	tags=28%, list=15%, signal=24%	FABP5/VAC14/ISYNA1/APOA1/PCYT1A/PCYT2/PI4KA/DGKZ/PIGT/PIP4K2A/CDS2/DPM3
GO:0002064	BP	GO:0002064	epithelial cell development	42	0.385095328740526	1.31301267959073	0.10377358490566	0.728281262745738	0.705464513719244	439	tags=23%, list=14%, signal=20%	TYMS/IKBKB/FNDC3A/FLNA/GPX1/AKR1B1/CCM2/RAP1B/FLNA/MYD88
GO:0004645	MF	GO:0004645	1,4-alpha-oligoglucan phosphorylase activity	3	0.794270833333333	1.31109731866219	0.109347442680776	0.728281262745738	0.705464513719244	635	tags=100%, list=21%, signal=79%	PYGM/PYGL/PYGB
GO:0008184	MF	GO:0008184	glycogen phosphorylase activity	3	0.794270833333333	1.31109731866219	0.109347442680776	0.728281262745738	0.705464513719244	635	tags=100%, list=21%, signal=79%	PYGM/PYGL/PYGB
GO:0102250	MF	GO:0102250	linear malto-oligosaccharide phosphorylase activity	3	0.794270833333333	1.31109731866219	0.109347442680776	0.728281262745738	0.705464513719244	635	tags=100%, list=21%, signal=79%	PYGM/PYGL/PYGB
GO:0102499	MF	GO:0102499	SHG alpha-glucan phosphorylase activity	3	0.794270833333333	1.31109731866219	0.109347442680776	0.728281262745738	0.705464513719244	635	tags=100%, list=21%, signal=79%	PYGM/PYGL/PYGB
GO:0009612	BP	GO:0009612	response to mechanical stimulus	39	0.386303272260871	1.31047600431291	0.109907120743034	0.728281262745738	0.705464513719244	729	tags=41%, list=24%, signal=32%	CHI3L1/GPI/CXCL12/STAT1/MAPK14/MAP2K4/BAG3/DAG1/MYD88/NFKB1/RPS6KB1/ACTA1/ATP1A2/HTT/PTK2/CNN2
GO:0019722	BP	GO:0019722	calcium-mediated signaling	43	0.380807132514559	1.30657244396926	0.115323854660348	0.728281262745738	0.705464513719244	785	tags=35%, list=26%, signal=26%	CLIC2/PTBP1/PTPRC/CHERP/NUDT4/PRKACA/PPP3R1/CD22/NCALD/ATP1A2/HTT/CALM3/PRKAA1/TBC1D10C/DMPK
GO:0007283	BP	GO:0007283	spermatogenesis	65	-0.337739783196335	-1.30598009589517	0.117478510028653	0.728281262745738	0.705464513719244	237	tags=8%, list=8%, signal=7%	GGT1/TRIP13/CRTAP/UBE2J1/ALKBH5
GO:0048232	BP	GO:0048232	male gamete generation	65	-0.337739783196335	-1.30598009589517	0.117478510028653	0.728281262745738	0.705464513719244	237	tags=8%, list=8%, signal=7%	GGT1/TRIP13/CRTAP/UBE2J1/ALKBH5
GO:0090571	CC	GO:0090571	RNA polymerase II transcription repressor complex	3	0.790127867724842	1.30425855426012	0.109347442680776	0.728281262745738	0.705464513719244	585	tags=67%, list=19%, signal=54%	DRAP1/BIN1
GO:0006401	BP	GO:0006401	RNA catabolic process	86	-0.318341412053631	-1.30341197032645	0.103151862464183	0.728281262745738	0.705464513719244	69	tags=3%, list=2%, signal=4%	PPP1R8/YBX1/ALKBH5
GO:0071219	BP	GO:0071219	cellular response to molecule of bacterial origin	43	-0.358176432965262	-1.30186313326813	0.111111111111111	0.728281262745738	0.705464513719244	76	tags=9%, list=2%, signal=9%	PLAA/BPI/CD68/CDK4
GO:0042531	BP	GO:0042531	positive regulation of tyrosine phosphorylation of STAT protein	3	0.787049580982108	1.29917724782773	0.112874779541446	0.728281262745738	0.705464513719244	546	tags=67%, list=18%, signal=55%	OSBP/HCLS1
GO:0008385	CC	GO:0008385	IkappaB kinase complex	3	0.784985574902482	1.29577020740382	0.112874779541446	0.728281262745738	0.705464513719244	25	tags=33%, list=1%, signal=33%	IKBKB
GO:0007614	BP	GO:0007614	short-term memory	3	0.784220184671753	1.29450678309422	0.112874779541446	0.728281262745738	0.705464513719244	636	tags=67%, list=21%, signal=53%	SLC2A4/SERPINF1
GO:0043374	BP	GO:0043374	CD8-positive, alpha-beta T cell differentiation	3	0.783926247074344	1.29402158235457	0.112874779541446	0.728281262745738	0.705464513719244	466	tags=67%, list=15%, signal=57%	SLC4A2/NCKAP1L
GO:0043376	BP	GO:0043376	regulation of CD8-positive, alpha-beta T cell differentiation	3	0.783926247074344	1.29402158235457	0.112874779541446	0.728281262745738	0.705464513719244	466	tags=67%, list=15%, signal=57%	SLC4A2/NCKAP1L
GO:2001185	BP	GO:2001185	regulation of CD8-positive, alpha-beta T cell activation	3	0.783926247074344	1.29402158235457	0.112874779541446	0.728281262745738	0.705464513719244	466	tags=67%, list=15%, signal=57%	SLC4A2/NCKAP1L
GO:0031386	MF	GO:0031386	protein tag activity	3	0.783178361870909	1.2927870534713	0.112874779541446	0.728281262745738	0.705464513719244	511	tags=67%, list=17%, signal=56%	ISG15/SUMO3
GO:0141047	MF	GO:0141047	molecular tag activity	3	0.783178361870909	1.2927870534713	0.112874779541446	0.728281262745738	0.705464513719244	511	tags=67%, list=17%, signal=56%	ISG15/SUMO3
GO:2000675	BP	GO:2000675	negative regulation of type B pancreatic cell apoptotic process	3	0.782987197547567	1.29247149985754	0.112874779541446	0.728281262745738	0.705464513719244	211	tags=67%, list=7%, signal=62%	WFS1/SRSF6
GO:0030168	BP	GO:0030168	platelet activation	47	-0.346396349102398	-1.29213329482439	0.120111731843575	0.728281262745738	0.705464513719244	429	tags=29%, list=14%, signal=25%	PRKCD/GNAQ/APOE/EMILIN2/F2/DGKZ/HBB/ADRA2A/HBB/FGG/CELA2A/COL3A1/FGB/FGA
GO:0038113	BP	GO:0038113	interleukin-9-mediated signaling pathway	3	0.782368633336358	1.29145044023317	0.112874779541446	0.728281262745738	0.705464513719244	410	tags=67%, list=13%, signal=58%	STAT1/STAT5A
GO:0071104	BP	GO:0071104	response to interleukin-9	3	0.782368633336358	1.29145044023317	0.112874779541446	0.728281262745738	0.705464513719244	410	tags=67%, list=13%, signal=58%	STAT1/STAT5A
GO:0071355	BP	GO:0071355	cellular response to interleukin-9	3	0.782368633336358	1.29145044023317	0.112874779541446	0.728281262745738	0.705464513719244	410	tags=67%, list=13%, signal=58%	STAT1/STAT5A
GO:0090043	BP	GO:0090043	regulation of tubulin deacetylation	3	0.7822265625	1.29121592489559	0.112874779541446	0.728281262745738	0.705464513719244	672	tags=100%, list=22%, signal=78%	FNTA/HDAC6/PRKAA1
GO:0099004	BP	GO:0099004	calmodulin dependent kinase signaling pathway	3	0.7822265625	1.29121592489559	0.112874779541446	0.728281262745738	0.705464513719244	672	tags=100%, list=22%, signal=78%	PCP4/HTT/PRKAA1
GO:0042110	BP	GO:0042110	T cell activation	97	-0.307192792511569	-1.29115690782815	0.114369501466276	0.728281262745738	0.705464513719244	274	tags=9%, list=9%, signal=9%	ERBB2/BRD4/STOML2/CAV1/PRKDC/FKBP1A/FKBP1A/CASP3/ALKBH5
GO:0140104	MF	GO:0140104	molecular carrier activity	35	0.388647447552234	1.28788557354388	0.11791730474732	0.728281262745738	0.705464513719244	688	tags=39%, list=22%, signal=31%	IPO5/NUTF2/XPO1/RAN/NUBP2/PARK7/BAG3/ATOX1/MYD88/XPO5/CLU/HSPA8/EMC8/TIMM9
GO:0034341	BP	GO:0034341	response to type II interferon	37	0.383675954071113	1.28703080696833	0.115740740740741	0.728281262745738	0.705464513719244	1270	tags=62%, list=41%, signal=37%	RPL13A/STAT1/CD74/RPS6KB1/ACTG1/TRIM21/SYNCRIP/NUB1/ACTR3/PDE12/CDC42/FLNB/GAPDH/ARG1/VAMP3/LGALS9/ZYX/CD47/ACTR2/MYO1C/STX4/GBP1/ASS1
GO:0005212	MF	GO:0005212	structural constituent of eye lens	3	0.778078762832145	1.28436918094548	0.119929453262787	0.728281262745738	0.705464513719244	278	tags=67%, list=9%, signal=61%	HSPB6/CRYAB
GO:0046649	BP	GO:0046649	lymphocyte activation	142	-0.283494878511939	-1.26762528795581	0.109677419354839	0.728281262745738	0.705464513719244	274	tags=18%, list=9%, signal=17%	MAD1L1/WAS/AP3D1/CDH17/CD2AP/PRKCD/LAMP1/ITGA4/SPTA1/SART1/MSH2/ERBB2/BRD4/BAK1/IKZF1/STOML2/CAV1/PRKDC/MS4A1/FKBP1A/MMP14/AP1G1/FKBP1A/CASP3/SUPT6H/ALKBH5
GO:0009144	BP	GO:0009144	purine nucleoside triphosphate metabolic process	96	0.313266858567633	1.26502450508316	0.104947526236882	0.728281262745738	0.705464513719244	1061	tags=41%, list=35%, signal=28%	NME2/NDUFB11/NDUFS8/RAN/ATP5PO/GPI/NME1/NDUFA9/IMPDH2/AK4/NDUFS2/PRKACA/ATP5F1C/NDUFV1/PGK1/ENO1/NDUFB5/NDUFA6/PFKM/HSPA8/ATP1A2/ALDOA/PRKAA1/AK3/ATP6V1B2/FOXK1/NDUFS1/ATP5F1A/PKM/PFKP/VCP/ENO2/PFKL/ALDOC/LDHA/GAPDH/GIT1/NDUFS3/ALDOA/SAMHD1
GO:0016049	BP	GO:0016049	cell growth	91	-0.305495457461655	-1.26456059870807	0.120234604105572	0.728281262745738	0.705464513719244	401	tags=22%, list=13%, signal=19%	CDC73/ITGA4/APOE/DNPH1/CYFIP1/YAP1/ERBB2/F2/CPNE1/SIN3A/CDHR2/PPP1R9B/TNC/EIF4G1/S100A8/MMP14/USP47/PLAA/DCLK1/FN1
GO:0003012	BP	GO:0003012	muscle system process	92	0.31670645295907	1.26325580244073	0.111951588502269	0.728281262745738	0.705464513719244	825	tags=35%, list=27%, signal=27%	CLIC2/FLNA/TPM1/TPM2/CRYAB/DES/PRKACA/ASPH/ENO1/FLNA/MAP2K4/DAG1/MYL9/LMOD1/SLMAP/RPS6KB1/MYLK/TMOD3/ACTA1/CAMK2B/BIN1/SNTA1/ATP1A2/ALDOA/PAK2/CALM3/SYNM/SOD1/TWF1/HSP90AA1/DMPK/PPP1R12B/CNN1/TPM4
GO:0062197	BP	GO:0062197	cellular response to chemical stress	79	0.322913196431201	1.25420867193793	0.115030674846626	0.728281262745738	0.705464513719244	700	tags=30%, list=23%, signal=24%	NME2/DNAJA1/TPM1/PCNA/PRDX5/SLC2A4/WNK1/GPX1/AKR1B1/DHFR/PARK7/MAP2K4/PPIA/HDAC6/SOD2/MYLK/CAB39/STAT6/FABP1/CDK1/DDX3X/PRKAA1/SOD1/TRIM21
GO:0002009	BP	GO:0002009	morphogenesis of an epithelium	78	0.323498470857303	1.2535398651892	0.117283950617284	0.728281262745738	0.705464513719244	643	tags=32%, list=21%, signal=26%	CSNK2B/VASP/FLNA/TGM2/ALDH1A3/CCM2/STAT1/PFN1/TRAF6/PRKACA/TGM3/GRB2/FLNA/PPP3R1/PPP1CA/ILK/DAG1/RAB10/ACTG1/WDR1/CLIC4/ITGA5/CD44/PAFAH1B1/RPS7
GO:0048729	BP	GO:0048729	tissue morphogenesis	92	0.314085199919956	1.25280033782867	0.118003025718608	0.728281262745738	0.705464513719244	643	tags=33%, list=21%, signal=27%	CSNK2B/VASP/FLNA/TGM2/TPM1/ALDH1A3/TXNRD1/VPS52/GPI/CCM2/STAT1/PFN1/TRAF6/PRKACA/TGM3/GRB2/FLNA/PPP3R1/PPP1CA/ILK/DAG1/RAB10/MYLK/ACTG1/ACTA1/WDR1/CLIC4/ITGA5/CD44/PAFAH1B1/RPS7
GO:0071214	BP	GO:0071214	cellular response to abiotic stimulus	67	0.332249966311493	1.25123987233341	0.106707317073171	0.728281262745738	0.705464513719244	527	tags=32%, list=17%, signal=27%	RPL26/MFAP4/PCNA/SLC2A4/WNK1/RDH11/AKR1B1/CRYAB/GRB2/BRCC3/MAPK14/RUVBL2/MAP2K4/BAG3/DAG1/PPID/MYD88/NFKB1/H2AX/MYLK/CAB39/GPLD1
GO:0104004	BP	GO:0104004	cellular response to environmental stimulus	67	0.332249966311493	1.25123987233341	0.106707317073171	0.728281262745738	0.705464513719244	527	tags=32%, list=17%, signal=27%	RPL26/MFAP4/PCNA/SLC2A4/WNK1/RDH11/AKR1B1/CRYAB/GRB2/BRCC3/MAPK14/RUVBL2/MAP2K4/BAG3/DAG1/PPID/MYD88/NFKB1/H2AX/MYLK/CAB39/GPLD1
GO:0050821	BP	GO:0050821	protein stabilization	73	0.326229466562504	1.25092809027375	0.113149847094801	0.728281262745738	0.705464513719244	741	tags=37%, list=24%, signal=29%	FLNA/CDK7/RPL11/PFDN6/WFS1/RPAP3/PFN1/PTGES3/HSP90AB1/CRYAB/CCT2/PARK7/RUVBL2/FLNA/BAG6/BAG3/CCT3/CREB1/WDR81/TCP1/PFDN2/CLU/HSPD1/CCT5/RPS7/CCT3/HSP90AA1/PHB1
GO:0006935	BP	GO:0006935	chemotaxis	79	0.321752862764671	1.24970188632809	0.119631901840491	0.728281262745738	0.705464513719244	496	tags=23%, list=16%, signal=20%	MIF/S100A9/WNK1/RPL13A/CXCL12/HSPB1/CD74/CORO1B/HMGB1/MAPK14/CORO1A/ELANE/PPIA/HDAC6/NCKAP1L/S100A12/PADI2/RAC2
GO:0042330	BP	GO:0042330	taxis	79	0.321752862764671	1.24970188632809	0.119631901840491	0.728281262745738	0.705464513719244	496	tags=23%, list=16%, signal=20%	MIF/S100A9/WNK1/RPL13A/CXCL12/HSPB1/CD74/CORO1B/HMGB1/MAPK14/CORO1A/ELANE/PPIA/HDAC6/NCKAP1L/S100A12/PADI2/RAC2
GO:0051338	BP	GO:0051338	regulation of transferase activity	133	0.287506076330053	1.2085937347876	0.117142857142857	0.728281262745738	0.705464513719244	741	tags=33%, list=24%, signal=26%	UBE2I/DNAJA1/CHI3L1/CDKN2C/PCNA/IPO5/CDK7/RPL11/PTPRC/PRKAR2B/LCP2/TRAF6/PTGES3/HNRNPD/HSPB1/CD74/HSP90AB1/ZFP91/PRRC1/CCT2/PARK7/EEF1A1/CORO1C/ELANE/PPIA/S100A12/RFC5/TCP1/CAB39/AIDA/PDCD4/ADAR/RPS7/HTT/PAK2/THY1/PTK2/CALM3/DDX3X/PPP2R5A/SOD1/EIF4A2/HSP90AA1/PHB1
GO:1901135	BP	GO:1901135	carbohydrate derivative metabolic process	288	0.255660022348157	1.18563264978419	0.10655737704918	0.728281262745738	0.705464513719244	616	tags=23%, list=20%, signal=21%	NME2/TYMS/RENBP/UGGT1/NT5C3A/GM2A/CHI3L1/ABHD10/PRPS2/SLC2A4/POGLUT3/NDUFB11/NDUFS8/RAN/ATP5PO/GPI/AKR1B1/ACSL1/SULT1A3/ERH/NME1/NUDT18/NDUFA9/NUDT4/IMPDH2/ALDH1A1/AK4/DCTPP1/NDUFS2/PRKACA/ATP5F1C/ACSS2/ACSL4/DPYD/PGM3/NDUFV1/PGK1/ENO1/PARK7/TM9SF2/NDUFB5/DDOST/NDUFA6/FCSK/FBXO6/PNP/GNPTAB/GART/UGP2/NFKB1/GMPS/PFKM/GOLGA2/TKT/ACSS1/GPLD1/ATIC/PPCS/PYGL/NEU1/GCDH/HSPA8/AMDHD2/CD44/ATP1A2/ALDOA/SLC…
GO:0046983	MF	GO:0046983	protein dimerization activity	239	0.260323584285413	1.18447321166252	0.117565698478562	0.728281262745738	0.705464513719244	759	tags=31%, list=25%, signal=25%	S100A11/TYMS/IKBKB/HSPB6/H2AC21/FLNA/SNF8/TCF4/TPM1/HIF1AN/TFRC/ALDH1A3/PAFAH1B3/PRPS2/EPHX2/FMR1/RAN/NPC1L1/PDCD6/DRAP1/ACOX1/STAT1/H2AC18/IDE/HSPB1/XPNPEP1/HSP90AB1/TPM2/CRYAB/DPYD/MNT/ENO1/PARK7/POLR1C/RUVBL2/FLNA/CORO1A/GSS/H2AZ2/H2AX/VPS4B/PNPO/IMPA1/TBC1D22A/NARS1/PADI2/NADK2/H2BC4/TKT/SLC3A2/YARS2/ATIC/PPCS/TAP1/CAMK2B/GCA/ATP1A2/GRPEL1/SCLY/PPP2R1A/PAFAH1B1/SRM/PRPS1/STOM/SARS1/MACROH2A2/…
GO:0042995	CC	GO:0042995	cell projection	428	0.244413769033401	1.17537842372462	0.102331606217617	0.728281262745738	0.705464513719244	999	tags=34%, list=32%, signal=27%	S100A11/NME2/BLOC1S3/VASP/FLNA/RPS6/CLCA1/STMN1/TPM1/MAP7/CFL1/DOCK7/FMR1/PDLIM7/RAN/ACTR10/WFS1/DYNLL2/GPI/PTPRC/PRKAR2B/ATP6V0D1/GNB1/ACADM/NME1/STAT1/ARPC2/HSPB1/ALDH1A1/HSP90AB1/STRN3/COQ6/CRYAB/NUBP2/CORO1B/TBCC/PRKACA/TMEM231/ABLIM1/PARK7/EEF1A1/SYNPO/ARPC1A/FLNA/DIAPH1/RPL28/SPG7/CORO1C/PPP1CA/NEXN/RAB27A/DOCK10/ILK/MAP2K4/CORO1A/MAP1S/CLIP1/DAG1/RAB10/CD177/ATP6V1D/HDAC6/EPS8L3/PFKM/RPS6K…
GO:0033554	BP	GO:0033554	cellular response to stress	407	0.243886055150345	1.17060995098391	0.105534105534106	0.728281262745738	0.705464513719244	773	tags=29%, list=25%, signal=25%	DAP/RPL26/NME2/TPT1/IKBKB/PRPF19/FLNA/UGGT1/DNAJA1/CLCA1/TPM1/COPS5/MIF/PCNA/PRDX5/CDK7/SLC2A4/FMR1/WNK1/NPC1L1/PDCD6/NUP62/GPX1/WFS1/CXCL12/AKR1B1/CCM2/TRAF6/CD74/MCM2/AK4/DCTPP1/HSP90AB1/CRYAB/PRKACA/DDAH1/HMGB1/DERL1/PGK1/MNT/ENO1/DHFR/GRB2/SMARCD2/PARK7/BRCC3/MAPK14/RUVBL2/FLNA/PPP2CB/BAG6/MAP2K4/SNW1/BAG3/OS9/DAG1/FBXO6/UBE2V1/PPIA/SSRP1/NFKB1/H2AX/ASNS/HDAC6/SLFN11/SOD2/POLD2/PDS5B/CANX/MYL…
GO:0032559	MF	GO:0032559	adenyl ribonucleotide binding	401	0.243822807832693	1.16997503393525	0.109254498714653	0.728281262745738	0.705464513719244	843	tags=31%, list=27%, signal=26%	NME2/IKBKB/UBE2I/OAS1/DNAJA1/DQX1/AFG2A/PRPS2/CDK7/DDX18/ACSS3/WNK1/TAP2/BTAF1/PSMC3/PRKAR2B/CYB5R3/ACSL1/PSMC1/BCS1L/CUL9/NME1/CSK/TP53RK/IDE/AACS/STK38L/MCM2/AK4/HSP90AB1/DNAJA2/NUBP2/SELENOO/PRKACA/ACSS2/ACSL4/CCT2/PGK1/PEBP1/TEP1/CKB/ACADL/MAPK14/RUVBL2/SPG7/ILK/MAP2K4/GSS/FCSK/DDX54/CKM/CCT3/GART/ASNS/VPS4B/SLFN11/GMPS/PFKM/RPS6KB1/NARS1/MYLK/ACTG1/RFC5/TCP1/NADK2/ACSS1/TARS1/GALK2/ACTA1/YAR…
GO:0005739	CC	GO:0005739	mitochondrion	459	0.23933128625435	1.15902395409975	0.10292249047014	0.728281262745738	0.705464513719244	799	tags=28%, list=26%, signal=25%	NME2/TYMS/HSPB6/TGM2/OAS1/DNAJA1/ABHD10/AFG2A/PRDX5/TXNRD1/MRPL1/PTRH2/ACADSB/MRM1/TOMM40/PUS1/CYB5R1/ACSS3/NDUFB11/ECHS1/COX7A2L/NDUFS8/ATP5PO/GPX1/MIX23/LDHB/GSDMD/SLC25A4/MRPL19/HSD17B10/CYB5R3/ACSL1/BCS1L/CCM2/ACADM/NDUFA9/SLC25A11/IDE/RAB7A/AK4/DCTPP1/HSP90AB1/SYNJ2BP/COQ6/CRYAB/NDUFS2/CLIC1/SELENOO/MGST3/PRKACA/ATP5F1C/ACSS2/ACSL4/TRMT5/HSCB/NDUFV1/DHFR/DNAJC11/PARK7/CKB/ACADL/MAPK14/ACAT2/…
GO:0012501	BP	GO:0012501	programmed cell death	441	0.239710386762274	1.15719297177427	0.117797695262484	0.728281262745738	0.705464513719244	742	tags=28%, list=24%, signal=25%	MX1/DAP/MX1/RPL26/NME2/TPT1/HSPB6/FLNA/TGM2/DNAJA1/RPS6/CHI3L1/COPS5/TFRC/ALDH1A3/MIF/PRDX5/S100A9/PTRH2/CFL1/PDCD6/SERPINB9/NUP62/GPX1/TCIRG1/WFS1/GSDMD/AIMP2/GPI/SLC25A4/PTPRC/CXCL12/AKR1B1/SRSF6/RPL10/NME1/STAT1/TRAF6/HSPB1/CD74/MCM2/XPNPEP1/HSP90AB1/CRYAB/PDCD5/HMGB1/PSME3/MNT/ENO1/PARK7/MAPK14/RUVBL2/FLNA/SPG7/PPP1CA/PPP2CB/BAG6/MAP2K4/SNW1/CORO1A/ACIN1/MAP1S/BAG3/ELANE/PPID/PPIA/MYD88/LCN2/…
GO:0017076	MF	GO:0017076	purine nucleotide binding	542	0.235482440915653	1.15315387244582	0.108418367346939	0.728281262745738	0.705464513719244	759	tags=28%, list=25%, signal=26%	MX1/MX1/NME2/IKBKB/UBE2I/TGM2/OAS1/DNAJA1/DQX1/ALDH1A3/AFG2A/TUBA1B/PRPS2/CDK7/DDX18/ACSS3/WNK1/TAP2/RAN/BTAF1/LDHB/IRGQ/PSMC3/PRKAR2B/DRG1/CYB5R3/ACSL1/PSMC1/BCS1L/CUL9/SAR1B/QDPR/NME1/PFN1/CSK/TP53RK/IDE/AACS/STK38L/RAP1B/ALDH1A1/MCM2/RAB7A/AK4/HSP90AB1/NDUFS2/DNAJA2/NUBP2/RAB12/ATL3/SELENOO/PRKACA/ACSS2/ACSL4/CCT2/DPYD/NDUFV1/PGK1/PEBP1/DHFR/TEP1/EEF1A1/CKB/TUBB/ACADL/MAPK14/RUVBL2/RAB5B/SPG7/…
GO:0006796	BP	GO:0006796	phosphate-containing compound metabolic process	579	0.233092947087411	1.14644133305323	0.108723135271808	0.728281262745738	0.705464513719244	797	tags=29%, list=26%, signal=27%	ASMTL/CSNK2B/NME2/TYMS/IKBKB/NT5C3A/DNAJA1/CHI3L1/PTBP1/CDKN2C/PNPLA6/FDPS/TFRC/MIF/ABHD16A/MOB3A/SPINK1/IPO5/PRPS2/CDK7/LCLAT1/EPHX2/NDUFB11/DOCK7/WNK1/NDUFS8/RAN/OSBP/ATP5PO/LDHB/MOB2/GPI/PTPRC/PRKAR2B/ACSL1/SULT1A3/NME1/LCP2/NUDT18/CSK/NDUFA9/TP53RK/TRAF6/STK38L/PTGES3/PPP1CB/NUDT4/HSPB1/IMPDH2/CD74/AK4/DCTPP1/HSP90AB1/NDUFS2/ZFP91/PRKACA/ATP5F1C/PRRC1/ACSS2/ACSL4/ILKAP/DPYD/NDUFV1/PGK1/ENO1/P…
GO:0050793	BP	GO:0050793	regulation of developmental process	411	0.241094981041865	1.15770663974298	0.120512820512821	0.728400414005898	0.705579932019985	798	tags=28%, list=26%, signal=24%	NME2/TPT1/IKBKB/HSPB6/FLNA/PCP4/TGM2/MAFG/ZC3H13/CHI3L1/PTBP1/TCF4/TPM1/HIF1AN/TFRC/INF2/CD101/EIF4E/ISG15/CFL1/DOCK7/FMR1/WNK1/PDCD6/PRXL2A/TCIRG1/PTPRC/CXCL12/SLC4A2/RBBP4/SRSF6/CCM2/STAT1/TRAF6/HSPB1/CD74/AHSG/HSP90AB1/SYNJ2BP/CORO1B/CLIC1/PRKACA/STRIP1/DDAH1/HMGB1/PGK1/FGL2/SMARCD2/MAPK14/RUVBL2/FLNA/DIAPH1/LIMD1/AGRN/CORO1C/ILK/BAG6/SNW1/CORO1A/ACIN1/DAG1/STAT5A/PNP/DDHD2/NFKB1/HDAC6/SOD2/NC…
GO:0038127	BP	GO:0038127	ERBB signaling pathway	36	-0.37926713494965	-1.32341359242572	0.120689655172414	0.728442226002249	0.705620434063883	409	tags=25%, list=13%, signal=22%	PLCG1/HIP1/VIL1/MMP9/ERBB2/PIGR/CPNE3/ADRA2A/RALB
GO:0032479	BP	GO:0032479	regulation of type I interferon production	36	0.385515694669338	1.28351960979496	0.120795107033639	0.728442226002249	0.705620434063883	1018	tags=53%, list=33%, signal=36%	OAS1/ISG15/STAT1/TRAF6/MYD88/OAS2/HSPD1/DDX3X/RIGI/NLRX1/TRIM21/HSP90AA1/DHX58/TRIM56/CUL3/UFD1/GAPDH/G3BP1/TOMM70
GO:0032606	BP	GO:0032606	type I interferon production	36	0.385515694669338	1.28351960979496	0.120795107033639	0.728442226002249	0.705620434063883	1018	tags=53%, list=33%, signal=36%	OAS1/ISG15/STAT1/TRAF6/MYD88/OAS2/HSPD1/DDX3X/RIGI/NLRX1/TRIM21/HSP90AA1/DHX58/TRIM56/CUL3/UFD1/GAPDH/G3BP1/TOMM70
GO:0010718	BP	GO:0010718	positive regulation of epithelial to mesenchymal transition	10	-0.541677374681287	-1.37649953355907	0.121052631578947	0.72944091435879	0.706587833929627	173	tags=36%, list=6%, signal=34%	AGT/TNXB/COL1A1/GLIPR2
GO:0097493	MF	GO:0097493	structural molecule activity conferring elasticity	7	-0.617648135003671	-1.42369275875706	0.121518987341772	0.731309086491943	0.708397477006932	632	tags=71%, list=21%, signal=57%	EMILIN1/FBN1/FBLN2/EMILIN2/AHNAK
GO:0099106	MF	GO:0099106	ion channel regulator activity	27	-0.39730066424374	-1.32157053137135	0.121546961325967	0.731309086491943	0.708397477006932	395	tags=29%, list=13%, signal=25%	LAMP1/PKP2/AMBP/NHERF1/STX7/CAV1/RSC1A1/VAMP8
GO:0033604	BP	GO:0033604	negative regulation of catecholamine secretion	3	-0.786619165619752	-1.40634316418167	0.12183908045977	0.732511320097527	0.709562045133733	303	tags=100%, list=10%, signal=90%	CHGA/ADRA2A
GO:0016805	MF	GO:0016805	dipeptidase activity	4	0.721771779336519	1.31365087367443	0.122073578595318	0.733365571334172	0.710389533034468	232	tags=25%, list=8%, signal=23%	CNDP2
GO:0030660	CC	GO:0030660	Golgi-associated vesicle membrane	20	-0.432592106026776	-1.33120213424951	0.122222222222222	0.733703143385443	0.710716529093789	609	tags=38%, list=20%, signal=31%	AP2A1/AP1M2/AP1M1/TMED2/PI4KA/CLTA/CLTB/AP1G1
GO:0034243	BP	GO:0034243	regulation of transcription elongation by RNA polymerase II	13	-0.496877926833887	-1.37727430659603	0.122666666666667	0.734995812601606	0.711968699521107	821	tags=62%, list=27%, signal=45%	HEXIM1/CCNK/INTS11/TCERG1/SUPT5H/CDC73/BRD4/SUPT6H
GO:1904036	BP	GO:1904036	negative regulation of epithelial cell apoptotic process	12	-0.499725890701585	-1.35167939823721	0.122715404699739	0.734995812601606	0.711968699521107	73	tags=58%, list=2%, signal=57%	PAK4/CAST/CDH5/YAP1/FGG/FGB/FGA
GO:0140299	MF	GO:0140299	small molecule sensor activity	9	0.578148205309997	1.3415964248656	0.12258064516129	0.734995812601606	0.711968699521107	717	tags=67%, list=23%, signal=51%	HIF1AN/NDUFS2/PARK7/UHRF1/MSH3/MSH6
GO:0006403	BP	GO:0006403	RNA localization	88	-0.306607886298481	-1.26297346415834	0.123209169054441	0.737396655819039	0.714294325319191	83	tags=6%, list=3%, signal=6%	CPSF6/NUP107/YBX1/SUPT6H/ALKBH5
GO:1903321	BP	GO:1903321	negative regulation of protein modification by small protein conjugation or removal	27	0.423238418202095	1.31503718447839	0.1234375	0.738206480783723	0.715078778804585	700	tags=37%, list=23%, signal=29%	DNAJA1/ISG15/RPL11/WNK1/U2AF2/PARK7/PPIA/NXN/RPS7/TRIM21
GO:0046165	BP	GO:0046165	alcohol biosynthetic process	33	0.399195365001638	1.30751032366936	0.123647604327666	0.738906165620752	0.71575654280671	687	tags=36%, list=22%, signal=29%	FDPS/NPC1L1/CYB5R3/QDPR/GOT1/DHFR/PARK7/NFKB1/IMPA1/CES1/PRKAA1/SOD1
GO:0034440	BP	GO:0034440	lipid oxidation	42	0.374061879080489	1.27539326896159	0.124213836477987	0.741731381707531	0.718493246048665	672	tags=36%, list=22%, signal=28%	ECHS1/HSD17B10/ACOX1/ACADM/ACADL/MAPK14/ACAT2/FABP3/BDH2/SAMD1/GCDH/FABP1/ECI1/ETFB/PRKAA1
GO:0140296	MF	GO:0140296	general transcription initiation factor binding	19	0.462706656342492	1.32226665914994	0.124600638977636	0.743481707463547	0.72018873482681	448	tags=32%, list=15%, signal=27%	TCF4/BTAF1/FBL/DRAP1/RUVBL2/NOP58
GO:0042987	BP	GO:0042987	amyloid precursor protein catabolic process	19	-0.438462084866225	-1.33549388357729	125	0.745304282494365	0.721954209340029	457	tags=50%, list=15%, signal=43%	SPON1/RELA/PICALM/ROCK1/RTN1/ROCK2/APOE/FKBP1A/FKBP1A/CASP3
GO:0071404	BP	GO:0071404	cellular response to low-density lipoprotein particle stimulus	11	-0.518233351871736	-1.36483983793282	0.125984251968504	0.74554804768234	0.722190337466062	133	tags=27%, list=4%, signal=26%	CD9/MIA3/CD68
GO:0000979	MF	GO:0000979	RNA polymerase II core promoter sequence-specific DNA binding	5	0.681481421743558	1.32749968286363	0.126036484245439	0.74554804768234	0.722190337466062	742	tags=80%, list=24%, signal=61%	STAT1/RUVBL2/GTF2B/HDAC1
GO:0120034	BP	GO:0120034	positive regulation of plasma membrane bounded cell projection assembly	31	0.408744982031165	1.31361388789077	0.12597200622084	0.74554804768234	0.722190337466062	1175	tags=65%, list=38%, signal=40%	FMR1/PFN1/ARPC2/AGRN/EPS8L3/FSCN1/RAC2/HTT/HSP90AA1/TAPT1/TWF2/ACTR3/BRK1/CDC42/PALM/CDC42EP5/MIEN1/NCKAP1/MTOR/ACTR2
GO:0030224	BP	GO:0030224	monocyte differentiation	6	0.644069924373567	1.31361136559215	0.125205930807249	0.74554804768234	0.722190337466062	572	tags=50%, list=19%, signal=41%	CD74/ACIN1/INPP5D
GO:0045664	BP	GO:0045664	regulation of neuron differentiation	20	0.453289442113582	1.31265217665274	0.126168224299065	0.74554804768234	0.722190337466062	186	tags=25%, list=6%, signal=24%	PCP4/PTBP1/TCF4/EIF4E/CXCL12
GO:0007004	BP	GO:0007004	telomere maintenance via telomerase	24	0.431879294546397	1.31052407912144	0.125391849529781	0.74554804768234	0.722190337466062	1063	tags=56%, list=35%, signal=37%	PTGES3/HSP90AB1/CCT2/CCT3/TCP1/HNRNPC/CCT5/CCT3/HSP90AA1/NEK7/CCT8/CCT6A/CCT7/HNRNPU
GO:1901875	BP	GO:1901875	positive regulation of post-translational protein modification	21	0.445019013158844	1.30913469687364	0.125776397515528	0.74554804768234	0.722190337466062	926	tags=48%, list=30%, signal=34%	PDCD6/WFS1/AIMP2/TRAF6/DERL1/UBE2V1/DDX3X/KDM1A/VCP/CUL3
GO:1903322	BP	GO:1903322	positive regulation of protein modification by small protein conjugation or removal	21	0.445019013158844	1.30913469687364	0.125776397515528	0.74554804768234	0.722190337466062	926	tags=48%, list=30%, signal=34%	PDCD6/WFS1/AIMP2/TRAF6/DERL1/UBE2V1/DDX3X/KDM1A/VCP/CUL3
GO:0042641	CC	GO:0042641	actomyosin	49	0.357259683275632	1.27205807245857	0.126153846153846	0.74554804768234	0.722190337466062	1168	tags=60%, list=38%, signal=38%	TPM1/PDLIM7/CORO1B/PGM5/ABLIM1/SYNPO/ILK/BAG3/MYL9/PDLIM3/SYNPO2/FSCN1/MYLK/ACTA1/LPP/PTK2/CNN2/PPP1R12B/EVL/TPM4/LCP1/ACTN4/PDLIM4/FLNB/PPP1R12C/FERMT2/MYH9/ZYX/ACTA2/PDLIM7/PALLD
GO:0002521	BP	GO:0002521	leukocyte differentiation	97	0.30764070612889	1.23830889201301	0.125567322239032	0.74554804768234	0.722190337466062	801	tags=33%, list=26%, signal=25%	NME2/TFRC/CD101/PRXL2A/TCIRG1/PTPRC/SLC4A2/TRAF6/CD74/HMGB1/FGL2/SMARCD2/MAPK14/DOCK10/ACIN1/STAT5A/PNP/MYD88/NCKAP1L/CREB1/HCLS1/GLO1/STAT6/PRTN3/INPP5D/PAFAH1B1/SOD1/SMARCC1/ATP6AP1/LTF/SMARCB1/TPD52
GO:0098800	CC	GO:0098800	inner mitochondrial membrane protein complex	65	0.327868869368985	1.2306468006596	0.125574272588055	0.74554804768234	0.722190337466062	770	tags=34%, list=25%, signal=26%	NDUFB11/COX7A2L/NDUFS8/ATP5PO/BCS1L/NDUFA9/NDUFS2/ATP5F1C/NDUFV1/DNAJC11/NDUFB5/SPG7/NDUFA6/COX7A2/GRPEL1/COX5B/TIMM9/COX7C/SAMM50/PHB1/NDUFS1/ATP5F1A
GO:0071824	BP	GO:0071824	protein-DNA complex organization	151	0.28110141654549	1.20022538056136	0.125714285714286	0.74554804768234	0.722190337466062	833	tags=33%, list=27%, signal=26%	H2AC21/TGM2/TCF4/NPM3/H1-2/BTAF1/GPX1/FBL/RBBP4/H2AC18/MCM2/H1-3/HMGB1/SMARCD2/BRCC3/RUVBL2/BAG6/RIOX2/H2AZ2/SSRP1/H1-10/MYD88/H2AX/HDAC6/SAMD1/SLFN11/PADI2/H2BC4/ZZEF1/PSMC6/UHRF1/DMAP1/HNRNPC/TOP1/CDK1/PRKAA1/MACROH2A2/SMARCC1/GTF2B/NAA50/TRRAP/SF3B1/PHB1/HDAC1/KDM1A/HCFC1/H3C1/SMARCB1/DDX21/SMCHD1/SET
GO:0006241	BP	GO:0006241	CTP biosynthetic process	6	0.64259479056613	1.31060275975312	0.126853377265239	0.747370751282061	0.723955936520173	227	tags=33%, list=7%, signal=31%	NME2/NME1
GO:0046036	BP	GO:0046036	CTP metabolic process	6	0.64259479056613	1.31060275975312	0.126853377265239	0.747370751282061	0.723955936520173	227	tags=33%, list=7%, signal=31%	NME2/NME1
GO:0035267	CC	GO:0035267	NuA4 histone acetyltransferase complex	6	0.641795749831174	1.30897307801937	0.126853377265239	0.747370751282061	0.723955936520173	724	tags=67%, list=24%, signal=51%	RUVBL2/ACTG1/DMAP1/TRRAP
GO:0043189	CC	GO:0043189	H4/H2A histone acetyltransferase complex	6	0.641795749831174	1.30897307801937	0.126853377265239	0.747370751282061	0.723955936520173	724	tags=67%, list=24%, signal=51%	RUVBL2/ACTG1/DMAP1/TRRAP
GO:1902255	BP	GO:1902255	positive regulation of intrinsic apoptotic signaling pathway by p53 class mediator	3	0.774739583333333	1.2788572206623	0.126984126984127	0.747586076962932	0.724164516137029	695	tags=100%, list=23%, signal=77%	RPL26/RPS7/EIF5A
GO:1904707	BP	GO:1904707	positive regulation of vascular associated smooth muscle cell proliferation	5	-0.685282543273749	-1.41053933673369	0.130325814536341	0.747907265530585	0.724475642000459	600	tags=100%, list=20%, signal=81%	GNAI2/DNMT1/MEF2D/MMP9
GO:1905515	BP	GO:1905515	non-motile cilium assembly	6	-0.637735279381509	-1.41000295296177	0.141772151898734	0.747907265530585	0.724475642000459	1095	tags=83%, list=36%, signal=54%	DCTN1/SEPTIN7/MAP4/EXOC5/MAPRE1
GO:0045747	BP	GO:0045747	positive regulation of Notch signaling pathway	6	-0.637083511033175	-1.40856192354798	0.141772151898734	0.747907265530585	0.724475642000459	546	tags=83%, list=18%, signal=69%	SRC/STAT3/PDCD10/BMP2K/YAP1
GO:1900424	BP	GO:1900424	regulation of defense response to bacterium	5	-0.683779624987495	-1.40744583116658	0.130325814536341	0.747907265530585	0.724475642000459	632	tags=80%, list=21%, signal=64%	EMILIN1/EMILIN2/CYBA/MMRN2
GO:1900426	BP	GO:1900426	positive regulation of defense response to bacterium	5	-0.683779624987495	-1.40744583116658	0.130325814536341	0.747907265530585	0.724475642000459	632	tags=80%, list=21%, signal=64%	EMILIN1/EMILIN2/CYBA/MMRN2
GO:0060674	BP	GO:0060674	placenta blood vessel development	5	-0.682321529229527	-1.40444458526659	0.135338345864662	0.747907265530585	0.724475642000459	257	tags=60%, list=8%, signal=55%	RBPJ/TMED2/PLG
GO:0006921	BP	GO:0006921	cellular component disassembly involved in execution phase of apoptosis	7	-0.607783472723567	-1.40095449167611	0.141772151898734	0.747907265530585	0.724475642000459	327	tags=43%, list=11%, signal=38%	AIFM1/SHARPIN/EXOG
GO:0030262	BP	GO:0030262	apoptotic nuclear changes	7	-0.607783472723567	-1.40095449167611	0.141772151898734	0.747907265530585	0.724475642000459	327	tags=43%, list=11%, signal=38%	AIFM1/SHARPIN/EXOG
GO:0004090	MF	GO:0004090	carbonyl reductase (NADPH) activity	4	-0.720749750004992	-1.40084872042283	0.128712871287129	0.747907265530585	0.724475642000459	663	tags=100%, list=22%, signal=79%	DCXR/DHRS1/CBR3
GO:0019814	CC	GO:0019814	immunoglobulin complex	4	-0.719485541498654	-1.39839160563585	0.131188118811881	0.747907265530585	0.724475642000459	471	tags=75%, list=15%, signal=64%	SYK/JCHAIN/PIGR
GO:0060193	BP	GO:0060193	positive regulation of lipase activity	7	-0.605034146797723	-1.39461723395563	0.149367088607595	0.747907265530585	0.724475642000459	435	tags=71%, list=14%, signal=61%	PDGFRB/PLIN5/GNAQ/APOA4/PLAA
GO:0036135	BP	GO:0036135	Schwann cell migration	3	-0.78000294858603	-1.39451447756331	0.128735632183908	0.747907265530585	0.724475642000459	51	tags=100%, list=2%, signal=98%	CERS2/RRAS2
GO:1900147	BP	GO:1900147	regulation of Schwann cell migration	3	-0.78000294858603	-1.39451447756331	0.128735632183908	0.747907265530585	0.724475642000459	51	tags=100%, list=2%, signal=98%	CERS2/RRAS2
GO:0097039	BP	GO:0097039	protein linear polyubiquitination	3	-0.779901950683493	-1.39433391024937	0.128735632183908	0.747907265530585	0.724475642000459	453	tags=100%, list=15%, signal=85%	RBCK1/SHARPIN
GO:0009200	BP	GO:0009200	deoxyribonucleoside triphosphate metabolic process	4	-0.717143127125281	-1.39383889066423	0.131188118811881	0.747907265530585	0.724475642000459	407	tags=75%, list=13%, signal=65%	RRM2B/ADK/ITPA
GO:1903719	BP	GO:1903719	regulation of I-kappaB phosphorylation	3	-0.778631700682054	-1.3920629162482	0.131034482758621	0.747907265530585	0.724475642000459	16	tags=100%, list=1%, signal=100%	SIRPA/DDRGK1
GO:0034349	BP	GO:0034349	glial cell apoptotic process	4	-0.716086799081249	-1.39178581220139	0.136138613861386	0.747907265530585	0.724475642000459	429	tags=50%, list=14%, signal=43%	PRKCD/CASP3
GO:0003176	BP	GO:0003176	aortic valve development	5	-0.675736019053209	-1.39088941558172	0.142857142857143	0.747907265530585	0.724475642000459	894	tags=80%, list=29%, signal=57%	RBPJ/EMILIN1/ROCK1/ROCK2
GO:1905314	BP	GO:1905314	semi-lunar valve development	5	-0.675736019053209	-1.39088941558172	0.142857142857143	0.747907265530585	0.724475642000459	894	tags=80%, list=29%, signal=57%	RBPJ/EMILIN1/ROCK1/ROCK2
GO:1901532	BP	GO:1901532	regulation of hematopoietic progenitor cell differentiation	5	-0.675447219540779	-1.39029497015667	0.142857142857143	0.747907265530585	0.724475642000459	305	tags=80%, list=10%, signal=72%	EIF2AK2/PUS7/NUDT21/PRKDC
GO:0051953	BP	GO:0051953	negative regulation of amine transport	4	-0.714993598891298	-1.38966106906101	0.136138613861386	0.747907265530585	0.724475642000459	303	tags=75%, list=10%, signal=68%	ABAT/CHGA/ADRA2A
GO:0000109	CC	GO:0000109	nucleotide-excision repair complex	5	-0.674189670614037	-1.38770651631898	0.142857142857143	0.747907265530585	0.724475642000459	737	tags=60%, list=24%, signal=46%	RAD23B/ERCC4/XRCC1
GO:0034379	BP	GO:0034379	very-low-density lipoprotein particle assembly	3	-0.775818175924725	-1.38703280576696	0.133333333333333	0.747907265530585	0.724475642000459	496	tags=67%, list=16%, signal=56%	APOB/APOC3
GO:0009247	BP	GO:0009247	glycolipid biosynthetic process	7	-0.600430256293975	-1.38400516342415	0.149367088607595	0.747907265530585	0.724475642000459	109	tags=29%, list=4%, signal=28%	PIGT/DPM3
GO:1904354	BP	GO:1904354	negative regulation of telomere capping	3	-0.7734375	-1.38277655641633	0.133333333333333	0.747907265530585	0.724475642000459	700	tags=100%, list=23%, signal=77%	ERCC4/XRCC1
GO:0140052	BP	GO:0140052	cellular response to oxidised low-density lipoprotein particle stimulus	3	-0.7720404651542	-1.38027889237331	0.135632183908046	0.747907265530585	0.724475642000459	133	tags=67%, list=4%, signal=64%	MIA3/CD68
GO:0070051	MF	GO:0070051	fibrinogen binding	4	-0.709869938263634	-1.3797027257746	0.143564356435644	0.747907265530585	0.724475642000459	811	tags=80%, list=26%, signal=59%	FBLN1/MFAP2/CDH5/FBLN1
GO:0002091	BP	GO:0002091	negative regulation of receptor internalization	4	-0.709857292818911	-1.3796781480969	0.143564356435644	0.747907265530585	0.724475642000459	294	tags=75%, list=10%, signal=68%	ATXN2/ANXA2/ANKRD13A
GO:0032239	BP	GO:0032239	regulation of nucleobase-containing compound transport	9	-0.559462906216167	-1.37655328663002	0.130890052356021	0.747907265530585	0.724475642000459	144	tags=33%, list=5%, signal=32%	CPSF6/RSC1A1/SUPT6H
GO:0060260	BP	GO:0060260	regulation of transcription initiation by RNA polymerase II	8	-0.579548526457053	-1.37528793078176	0.131105398457584	0.747907265530585	0.724475642000459	123	tags=25%, list=4%, signal=24%	TAF7/CDK4
GO:1903895	BP	GO:1903895	negative regulation of IRE1-mediated unfolded protein response	3	-0.768877497435073	-1.37462403647259	0.140229885057471	0.747907265530585	0.724475642000459	16	tags=67%, list=1%, signal=66%	UFL1/DDRGK1
GO:0010640	BP	GO:0010640	regulation of platelet-derived growth factor receptor signaling pathway	7	-0.595883115580745	-1.37352390242846	0.154430379746835	0.747907265530585	0.724475642000459	1119	tags=86%, list=36%, signal=55%	SRC/CBL/ADIPOQ/HGS/HIP1/NHERF1
GO:0072572	MF	GO:0072572	poly-ADP-D-ribose binding	3	-0.76711060677958	-1.37146513226098	0.140229885057471	0.747907265530585	0.724475642000459	327	tags=67%, list=11%, signal=60%	AIFM1/XRCC1
GO:2000142	BP	GO:2000142	regulation of DNA-templated transcription initiation	9	-0.557347894796359	-1.37134932066758	0.130890052356021	0.747907265530585	0.724475642000459	123	tags=22%, list=4%, signal=21%	TAF7/CDK4
GO:0051601	BP	GO:0051601	exocyst localization	4	-0.705504531502325	-1.37121812418346	0.146039603960396	0.747907265530585	0.724475642000459	13	tags=50%, list=0%, signal=50%	TNFAIP2/RALB
GO:0004859	MF	GO:0004859	phospholipase inhibitor activity	4	-0.704073103860987	-1.36843600240023	0.150990099009901	0.747907265530585	0.724475642000459	459	tags=75%, list=15%, signal=64%	ANXA1/ANXA4/ANXA2
GO:0061673	CC	GO:0061673	mitotic spindle astral microtubule	3	-0.765299479166667	-1.36822713978737	0.142528735632184	0.747907265530585	0.724475642000459	725	tags=100%, list=24%, signal=76%	MISP/MAPRE1
GO:1904778	BP	GO:1904778	positive regulation of protein localization to cell cortex	3	-0.765299479166667	-1.36822713978737	0.142528735632184	0.747907265530585	0.724475642000459	725	tags=100%, list=24%, signal=76%	EPB41L2/PPP1R9B
GO:0050996	BP	GO:0050996	positive regulation of lipid catabolic process	7	-0.593350115248564	-1.36768528003736	0.154430379746835	0.747907265530585	0.724475642000459	435	tags=57%, list=14%, signal=49%	PLIN5/PRKCD/APOA4/AKT2
GO:0050709	BP	GO:0050709	negative regulation of protein secretion	9	-0.555412267339815	-1.36658672728133	0.133507853403141	0.747907265530585	0.724475642000459	844	tags=67%, list=27%, signal=49%	HADH/ERP29/PTPN11/APOE/CHGA/ADRA2A
GO:0042564	CC	GO:0042564	NLS-dependent protein nuclear import complex	3	-0.76434572546381	-1.3665219880965	0.142528735632184	0.747907265530585	0.724475642000459	360	tags=67%, list=12%, signal=59%	KPNB1/KPNA2
GO:0060414	BP	GO:0060414	aorta smooth muscle tissue morphogenesis	3	-0.764078927294156	-1.36604499770711	0.142528735632184	0.747907265530585	0.724475642000459	117	tags=67%, list=4%, signal=64%	EFEMP2/COL3A1
GO:0043306	BP	GO:0043306	positive regulation of mast cell degranulation	4	-0.702730845967885	-1.36582719087859	0.150990099009901	0.747907265530585	0.724475642000459	102	tags=75%, list=3%, signal=73%	SYK/VAMP7/VAMP8
GO:0060218	BP	GO:0060218	hematopoietic stem cell differentiation	6	-0.617679386070079	-1.36566030843875	0.159493670886076	0.747907265530585	0.724475642000459	206	tags=67%, list=7%, signal=62%	PUS7/UFL1/XRCC5/PRKDC
GO:0032914	BP	GO:0032914	positive regulation of transforming growth factor beta1 production	3	-0.763242954113773	-1.36455041784044	0.142528735632184	0.747907265530585	0.724475642000459	615	tags=100%, list=20%, signal=80%	AGT/LUM
GO:0010756	BP	GO:0010756	positive regulation of plasminogen activation	4	-0.701385381635793	-1.36321214732433	0.150990099009901	0.747907265530585	0.724475642000459	294	tags=75%, list=10%, signal=68%	ANXA2/CLEC3B/S100A10
GO:0005262	MF	GO:0005262	calcium channel activity	5	-0.661590548114962	-1.3617733328931	0.160401002506266	0.747907265530585	0.724475642000459	641	tags=80%, list=21%, signal=63%	CUL5/ITPR1/ITPR3/SEC61A1
GO:0035173	MF	GO:0035173	histone kinase activity	7	-0.590620772397058	-1.36139408374996	0.154430379746835	0.747907265530585	0.724475642000459	184	tags=29%, list=6%, signal=27%	PRKDC/RPS6KA5
GO:0044754	CC	GO:0044754	autolysosome	4	-0.700423314881146	-1.36134227503898	0.150990099009901	0.747907265530585	0.724475642000459	925	tags=100%, list=30%, signal=70%	GAA/FTL/LAMP1/FTH1
GO:1904464	BP	GO:1904464	regulation of matrix metallopeptidase secretion	3	-0.76112286665414	-1.36076005696871	0.142528735632184	0.747907265530585	0.724475642000459	699	tags=100%, list=23%, signal=77%	RAP1GDS1/SLC12A2
GO:1990773	BP	GO:1990773	matrix metallopeptidase secretion	3	-0.76112286665414	-1.36076005696871	0.142528735632184	0.747907265530585	0.724475642000459	699	tags=100%, list=23%, signal=77%	RAP1GDS1/SLC12A2
GO:1990416	BP	GO:1990416	cellular response to brain-derived neurotrophic factor stimulus	3	-0.759945783453629	-1.35865562958496	0.144827586206897	0.747907265530585	0.724475642000459	576	tags=100%, list=19%, signal=81%	EIF4A3/EEF2K
GO:0038166	BP	GO:0038166	angiotensin-activated signaling pathway	9	-0.551474760210222	-1.35689852754522	0.136125654450262	0.747907265530585	0.724475642000459	860	tags=67%, list=28%, signal=48%	CA2/RAP1GDS1/ROCK1/AGT/ROCK2/CAV1
GO:0101004	CC	GO:0101004	cytolytic granule membrane	3	-0.758159972320947	-1.35546289873281	0.147126436781609	0.747907265530585	0.724475642000459	395	tags=100%, list=13%, signal=87%	KIF5B/LAMP1
GO:0002717	BP	GO:0002717	positive regulation of natural killer cell mediated immunity	3	-0.75802996744856	-1.3552304718208	0.147126436781609	0.747907265530585	0.724475642000459	395	tags=67%, list=13%, signal=58%	LAMP1/AP1G1
GO:0045954	BP	GO:0045954	positive regulation of natural killer cell mediated cytotoxicity	3	-0.75802996744856	-1.3552304718208	0.147126436781609	0.747907265530585	0.724475642000459	395	tags=67%, list=13%, signal=58%	LAMP1/AP1G1
GO:0006308	BP	GO:0006308	DNA catabolic process	5	-0.657903912796582	-1.35418501156811	0.165413533834586	0.747907265530585	0.724475642000459	327	tags=60%, list=11%, signal=54%	APAF1/AIFM1/EXOG
GO:0008656	MF	GO:0008656	cysteine-type endopeptidase activator activity involved in apoptotic process	7	-0.587412402836993	-1.35399872019065	0.156962025316456	0.747907265530585	0.724475642000459	50	tags=57%, list=2%, signal=56%	BCL2L13/CASP1/APAF1/RPS27L
GO:0071634	BP	GO:0071634	regulation of transforming growth factor beta production	9	-0.550195631741148	-1.35375124382263	0.136125654450262	0.747907265530585	0.724475642000459	615	tags=56%, list=20%, signal=45%	AGT/LUM/CD2AP/SERPINF2/FN1
GO:0140673	BP	GO:0140673	transcription elongation-coupled chromatin remodeling	4	-0.696426861420939	-1.35357477083114	0.153465346534653	0.747907265530585	0.724475642000459	17	tags=50%, list=1%, signal=50%	SUPT5H/SUPT6H
GO:0031045	CC	GO:0031045	dense core granule	3	-0.755211279837928	-1.35019113102359	0.149425287356322	0.747907265530585	0.724475642000459	303	tags=100%, list=10%, signal=90%	GNAI2/CHGA
GO:0098651	CC	GO:0098651	basement membrane collagen trimer	3	-0.754754948507926	-1.3493752871253	0.149425287356322	0.747907265530585	0.724475642000459	54	tags=67%, list=2%, signal=66%	COL4A1/COL4A2
GO:0014014	BP	GO:0014014	negative regulation of gliogenesis	3	-0.754685944839182	-1.34925192013644	0.149425287356322	0.747907265530585	0.724475642000459	667	tags=100%, list=22%, signal=78%	CERS2/F2
GO:0016558	BP	GO:0016558	protein import into peroxisome matrix	3	-0.754146351277366	-1.34828721732946	0.149425287356322	0.747907265530585	0.724475642000459	22	tags=67%, list=1%, signal=66%	PEX5/PEX16
GO:0072662	BP	GO:0072662	protein localization to peroxisome	3	-0.754146351277366	-1.34828721732946	0.149425287356322	0.747907265530585	0.724475642000459	22	tags=67%, list=1%, signal=66%	PEX5/PEX16
GO:0072663	BP	GO:0072663	establishment of protein localization to peroxisome	3	-0.754146351277366	-1.34828721732946	0.149425287356322	0.747907265530585	0.724475642000459	22	tags=67%, list=1%, signal=66%	PEX5/PEX16
GO:0008180	CC	GO:0008180	COP9 signalosome	15	0.494358791861765	1.34805119673919	0.130094043887147	0.747907265530585	0.724475642000459	363	tags=40%, list=12%, signal=35%	COPS5/DOCK7/COPS6/HSP90AB1/GRB2/COPS2
GO:0060416	BP	GO:0060416	response to growth hormone	10	0.557105900116635	1.34684093127454	0.130225080385852	0.747907265530585	0.724475642000459	653	tags=40%, list=21%, signal=32%	NME2/STAT5A/STAT6/PTK2
GO:0070070	BP	GO:0070070	proton-transporting V-type ATPase complex assembly	3	-0.75321729042208	-1.34662621230944	0.149425287356322	0.747907265530585	0.724475642000459	227	tags=67%, list=7%, signal=62%	VMA21/ALDOB
GO:0070072	BP	GO:0070072	vacuolar proton-transporting V-type ATPase complex assembly	3	-0.75321729042208	-1.34662621230944	0.149425287356322	0.747907265530585	0.724475642000459	227	tags=67%, list=7%, signal=62%	VMA21/ALDOB
GO:0030325	BP	GO:0030325	adrenal gland development	3	-0.753212208152936	-1.34661712606443	0.149425287356322	0.747907265530585	0.724475642000459	554	tags=100%, list=18%, signal=82%	CYP1B1/APOA1
GO:0045324	BP	GO:0045324	late endosome to vacuole transport	14	-0.474571553752864	-1.3462716620069	0.132075471698113	0.747907265530585	0.724475642000459	526	tags=43%, list=17%, signal=36%	CHMP6/VTA1/CHMP4C/CHMP1A/VPS37C/CHMP4B
GO:0016004	MF	GO:0016004	phospholipase activator activity	7	-0.583668084403895	-1.34536798249782	0.162025316455696	0.747907265530585	0.724475642000459	76	tags=43%, list=2%, signal=42%	ARF4/PLAA/CASP3
GO:0060229	MF	GO:0060229	lipase activator activity	7	-0.583668084403895	-1.34536798249782	0.162025316455696	0.747907265530585	0.724475642000459	76	tags=43%, list=2%, signal=42%	ARF4/PLAA/CASP3
GO:0051496	BP	GO:0051496	positive regulation of stress fiber assembly	14	-0.473779135725216	-1.34402371872701	0.137466307277628	0.747907265530585	0.724475642000459	422	tags=47%, list=14%, signal=40%	SORBS3/SERPINF2/ROCK2/APOA1/TPM1/S100A10/PFN2
GO:0071360	BP	GO:0071360	cellular response to exogenous dsRNA	9	-0.545882878965225	-1.34313975565754	0.141361256544503	0.747907265530585	0.724475642000459	544	tags=44%, list=18%, signal=37%	IRF3/FLOT1/CAV1/RALB
GO:0098911	BP	GO:0098911	regulation of ventricular cardiac muscle cell action potential	7	-0.582639943831424	-1.34299809549411	0.162025316455696	0.747907265530585	0.724475642000459	758	tags=71%, list=25%, signal=54%	DSC2/DSP/PKP2/CAV1/DSG2
GO:0032801	BP	GO:0032801	receptor catabolic process	7	-0.582472922138593	-1.34261310675835	0.162025316455696	0.747907265530585	0.724475642000459	573	tags=43%, list=19%, signal=35%	SH3GLB1/APOE/ANXA2
GO:0098533	CC	GO:0098533	ATPase dependent transmembrane transport complex	4	-0.690038820563725	-1.34115897899664	0.158415841584158	0.747907265530585	0.724475642000459	31	tags=50%, list=1%, signal=50%	ATP1A1/ABCB8
GO:0006116	BP	GO:0006116	NADH oxidation	3	-0.749568721908203	-1.3401031836155	0.149425287356322	0.747907265530585	0.724475642000459	561	tags=100%, list=18%, signal=82%	PCK2/ALDOB
GO:0019511	BP	GO:0019511	peptidyl-proline hydroxylation	4	-0.688584526701861	-1.33833241444285	0.158415841584158	0.747907265530585	0.724475642000459	226	tags=75%, list=7%, signal=70%	P4HA2/P4HA1/CRTAP
GO:0034447	BP	GO:0034447	very-low-density lipoprotein particle clearance	3	-0.747179060680375	-1.33583087004961	0.163218390804598	0.747907265530585	0.724475642000459	377	tags=67%, list=12%, signal=59%	APOE/APOC3
GO:2000243	BP	GO:2000243	positive regulation of reproductive process	6	-0.603941421928482	-1.33528631058478	0.159493670886076	0.747907265530585	0.724475642000459	819	tags=83%, list=27%, signal=61%	AGO2/SRC/RETN/DHX37/CIB1
GO:0016722	MF	GO:0016722	oxidoreductase activity, acting on metal ions	3	-0.74673329547422	-1.33503391660898	0.163218390804598	0.747907265530585	0.724475642000459	520	tags=100%, list=17%, signal=83%	CP/FTH1
GO:0032585	CC	GO:0032585	multivesicular body membrane	9	-0.542375368998604	-1.33450955994877	0.141361256544503	0.747907265530585	0.724475642000459	174	tags=56%, list=6%, signal=53%	HGS/CHMP6/CHMP4C/CHMP1A/CHMP4B
GO:2000535	BP	GO:2000535	regulation of entry of bacterium into host cell	3	-0.745955875049352	-1.33364401925077	0.16551724137931	0.747907265530585	0.724475642000459	448	tags=100%, list=15%, signal=86%	EXOC2/CAV1
GO:0042471	BP	GO:0042471	ear morphogenesis	15	-0.47350397714401	-1.33363678943987	0.134615384615385	0.747907265530585	0.724475642000459	437	tags=60%, list=14%, signal=52%	NAGLU/SCRIB/PRKRA/USH1C/MYO6/HMX2/PTK7/NHERF1/COL2A1
GO:0070836	BP	GO:0070836	caveola assembly	4	-0.68574647728152	-1.33281638353344	0.168316831683168	0.747907265530585	0.724475642000459	187	tags=75%, list=6%, signal=71%	COL6A1/CAV2/CAV1
GO:0016101	BP	GO:0016101	diterpenoid metabolic process	13	0.508696603562077	1.33267008411738	0.130781499202552	0.747907265530585	0.724475642000459	258	tags=31%, list=8%, signal=28%	ALDH1A3/RDH11/AKR1B1/ALDH1A1
GO:0006064	BP	GO:0006064	glucuronate catabolic process	4	-0.68566504913892	-1.33265811985126	0.168316831683168	0.747907265530585	0.724475642000459	82	tags=50%, list=3%, signal=49%	DCXR/SORD
GO:0019640	BP	GO:0019640	glucuronate catabolic process to xylulose 5-phosphate	4	-0.68566504913892	-1.33265811985126	0.168316831683168	0.747907265530585	0.724475642000459	82	tags=50%, list=3%, signal=49%	DCXR/SORD
GO:0001938	BP	GO:0001938	positive regulation of endothelial cell proliferation	15	0.48791103218977	1.33046900686979	0.134796238244514	0.747907265530585	0.724475642000459	410	tags=27%, list=13%, signal=23%	PDCD6/CXCL12/HMGB1/STAT5A
GO:0030857	BP	GO:0030857	negative regulation of epithelial cell differentiation	7	-0.577157592094073	-1.3303611521811	0.164556962025316	0.747907265530585	0.724475642000459	321	tags=57%, list=10%, signal=51%	MMP9/YAP1/CAV1/REG3G
GO:0021799	BP	GO:0021799	cerebral cortex radially oriented cell migration	9	-0.540684675634463	-1.33034962462289	0.146596858638743	0.747907265530585	0.724475642000459	42	tags=33%, list=1%, signal=33%	RTN4/MBOAT7/COL3A1
GO:0021801	BP	GO:0021801	cerebral cortex radial glia-guided migration	9	-0.540684675634463	-1.33034962462289	0.146596858638743	0.747907265530585	0.724475642000459	42	tags=33%, list=1%, signal=33%	RTN4/MBOAT7/COL3A1
GO:0022030	BP	GO:0022030	telencephalon glial cell migration	9	-0.540684675634463	-1.33034962462289	0.146596858638743	0.747907265530585	0.724475642000459	42	tags=33%, list=1%, signal=33%	RTN4/MBOAT7/COL3A1
GO:0030888	BP	GO:0030888	regulation of B cell proliferation	12	0.524628195055077	1.33033841388981	0.127625201938611	0.747907265530585	0.724475642000459	572	tags=58%, list=19%, signal=48%	TFRC/MIF/PTPRC/CD74/CD22/NCKAP1L/INPP5D
GO:0012510	CC	GO:0012510	trans-Golgi network transport vesicle membrane	9	-0.540680017395243	-1.33033816306854	0.146596858638743	0.747907265530585	0.724475642000459	609	tags=60%, list=20%, signal=48%	AP2A1/AP1M2/AP1M1/CLTA/CLTB/AP1G1
GO:0030130	CC	GO:0030130	clathrin coat of trans-Golgi network vesicle	9	-0.540680017395243	-1.33033816306854	0.146596858638743	0.747907265530585	0.724475642000459	609	tags=60%, list=20%, signal=48%	AP2A1/AP1M2/AP1M1/CLTA/CLTB/AP1G1
GO:0032511	BP	GO:0032511	late endosome to vacuole transport via multivesicular body sorting pathway	11	-0.505003837212343	-1.32999806524791	0.146981627296588	0.747907265530585	0.724475642000459	526	tags=45%, list=17%, signal=38%	CHMP6/VTA1/CHMP4C/VPS37C/CHMP4B
GO:0071825	BP	GO:0071825	protein-lipid complex organization	11	-0.504933028257601	-1.32981157998607	0.146981627296588	0.747907265530585	0.724475642000459	615	tags=55%, list=20%, signal=44%	AGT/APOB/APOE/APOA1/APOA4/APOC3
GO:0003170	BP	GO:0003170	heart valve development	9	-0.540457273034991	-1.32979010263812	0.149214659685864	0.747907265530585	0.724475642000459	894	tags=78%, list=29%, signal=55%	HECTD1/RBPJ/NAGLU/EMILIN1/ROCK1/ROCK2/MATR3
GO:0042608	MF	GO:0042608	T cell receptor binding	3	-0.743560856841337	-1.32936212830259	0.16551724137931	0.747907265530585	0.724475642000459	212	tags=100%, list=7%, signal=93%	CD3E/STOML2
GO:0001091	MF	GO:0001091	RNA polymerase II general transcription initiation factor binding	11	0.537101212941852	1.32928691189821	0.130434782608696	0.747907265530585	0.724475642000459	448	tags=45%, list=15%, signal=39%	TCF4/FBL/DRAP1/RUVBL2/NOP58
GO:0170036	BP	GO:0170036	import into the mitochondrion	11	0.536795186447979	1.32852951831355	0.132045088566828	0.747907265530585	0.724475642000459	1092	tags=55%, list=36%, signal=35%	TOMM40/TOMM7/GRPEL1/AFG3L2/TOMM70/TIMM50
GO:0030220	BP	GO:0030220	platelet formation	11	-0.504301300556988	-1.32814783694559	0.146981627296588	0.747907265530585	0.724475642000459	772	tags=55%, list=25%, signal=41%	PTPN11/NBEAL2/MFAP2/CIB1/PRKDC/CASP3
GO:0036344	BP	GO:0036344	platelet morphogenesis	11	-0.504301300556988	-1.32814783694559	0.146981627296588	0.747907265530585	0.724475642000459	772	tags=55%, list=25%, signal=41%	PTPN11/NBEAL2/MFAP2/CIB1/PRKDC/CASP3
GO:0042571	CC	GO:0042571	immunoglobulin complex, circulating	3	-0.74271155159172	-1.32784371293172	0.16551724137931	0.747907265530585	0.724475642000459	471	tags=67%, list=15%, signal=57%	JCHAIN/PIGR
GO:0051014	BP	GO:0051014	actin filament severing	11	0.536472849915974	1.32773175855636	0.13365539452496	0.747907265530585	0.724475642000459	129	tags=18%, list=4%, signal=17%	DSTN/CFL1
GO:0016073	BP	GO:0016073	snRNA metabolic process	10	0.548540528564503	1.32613357025832	0.139871382636656	0.747907265530585	0.724475642000459	731	tags=50%, list=24%, signal=38%	CDK7/EXOSC4/INTS13/MTREX/MEPCE
GO:0019915	BP	GO:0019915	lipid storage	17	-0.452814480820627	-1.32591260252587	0.130666666666667	0.747907265530585	0.724475642000459	597	tags=59%, list=19%, signal=48%	C3/HEXA/PLIN3/APOB/PLIN5/AUP1/APOE/APOA1/CAV1/CDS2
GO:0031201	CC	GO:0031201	SNARE complex	13	-0.478107368519902	-1.32524501269874	144	0.747907265530585	0.724475642000459	202	tags=31%, list=7%, signal=29%	SEC22B/STX7/VAMP8/SNAP23
GO:0000803	CC	GO:0000803	sex chromosome	8	0.59476276811781	1.325181473847	0.127243066884176	0.747907265530585	0.724475642000459	1063	tags=75%, list=35%, signal=49%	H2AX/MACROH2A2/SMARCC1/SMARCB1/SMCHD1/HNRNPU
GO:0035107	BP	GO:0035107	appendage morphogenesis	9	-0.538558888010069	-1.32511914390911	0.154450261780105	0.747907265530585	0.724475642000459	252	tags=33%, list=8%, signal=31%	BAK1/COL3A1/COL2A1
GO:0035108	BP	GO:0035108	limb morphogenesis	9	-0.538558888010069	-1.32511914390911	0.154450261780105	0.747907265530585	0.724475642000459	252	tags=33%, list=8%, signal=31%	BAK1/COL3A1/COL2A1
GO:0034063	BP	GO:0034063	stress granule assembly	16	0.479161754031203	1.32506523329882	0.131746031746032	0.747907265530585	0.724475642000459	672	tags=38%, list=22%, signal=29%	RPS23/UBAP2L/FMR1/DDX6/DDX3X/PRKAA1
GO:0048251	BP	GO:0048251	elastic fiber assembly	7	-0.574192184869291	-1.32352582223607	0.167088607594937	0.747907265530585	0.724475642000459	336	tags=56%, list=11%, signal=50%	EMILIN1/MYH11/TNXB/EFEMP2/COL3A1
GO:0097292	BP	GO:0097292	XMP metabolic process	5	0.679306684771723	1.32326337861774	0.129353233830846	0.747907265530585	0.724475642000459	828	tags=80%, list=27%, signal=59%	IMPDH2/GART/ATIC/ADSL
GO:0097293	BP	GO:0097293	XMP biosynthetic process	5	0.679306684771723	1.32326337861774	0.129353233830846	0.747907265530585	0.724475642000459	828	tags=80%, list=27%, signal=59%	IMPDH2/GART/ATIC/ADSL
GO:0097294	BP	GO:0097294	'de novo' XMP biosynthetic process	5	0.679306684771723	1.32326337861774	0.129353233830846	0.747907265530585	0.724475642000459	828	tags=80%, list=27%, signal=59%	IMPDH2/GART/ATIC/ADSL
GO:0001773	BP	GO:0001773	myeloid dendritic cell activation	5	0.678763538179217	1.32220534987874	0.129353233830846	0.747907265530585	0.724475642000459	319	tags=40%, list=10%, signal=36%	TRAF6/HMGB1
GO:0086091	BP	GO:0086091	regulation of heart rate by cardiac conduction	9	-0.537314674983839	-1.32205776930948	0.157068062827225	0.747907265530585	0.724475642000459	758	tags=56%, list=25%, signal=42%	DSC2/DSP/PKP2/CAV1/DSG2
GO:0009130	BP	GO:0009130	pyrimidine nucleoside monophosphate biosynthetic process	10	0.54673700522507	1.32177343145248	0.146302250803859	0.747907265530585	0.724475642000459	1067	tags=60%, list=35%, signal=39%	TYMS/DUT/CMPK1/UMPS/SHMT1/UPP1
GO:0034703	CC	GO:0034703	cation channel complex	8	-0.556736626386492	-1.32115453312301	0.151670951156812	0.747907265530585	0.724475642000459	270	tags=44%, list=9%, signal=41%	PTPA/FKBP1A/ABCB8/FKBP1A
GO:0048246	BP	GO:0048246	macrophage chemotaxis	12	0.520928870718276	1.32095776428487	0.134087237479806	0.747907265530585	0.724475642000459	1091	tags=58%, list=35%, signal=38%	MIF/RPL13A/PTK2/C5/RARRES2/DDT/NUP85
GO:0003746	MF	GO:0003746	translation elongation factor activity	10	0.546161859562763	1.32038297818448	0.146302250803859	0.747907265530585	0.724475642000459	1238	tags=70%, list=40%, signal=42%	EEF1A1/EIF5A/TUFM/EEF1A2/EEF1G/EEF1B2/EEF1D
GO:0070471	BP	GO:0070471	uterine smooth muscle contraction	3	-0.73828125	-1.31992307657922	0.167816091954023	0.747907265530585	0.724475642000459	808	tags=100%, list=26%, signal=74%	SETD3/ADRA2A
GO:0070472	BP	GO:0070472	regulation of uterine smooth muscle contraction	3	-0.73828125	-1.31992307657922	0.167816091954023	0.747907265530585	0.724475642000459	808	tags=100%, list=26%, signal=74%	SETD3/ADRA2A
GO:0003995	MF	GO:0003995	acyl-CoA dehydrogenase activity	8	0.591545092116766	1.31801222107262	0.132137030995106	0.747907265530585	0.724475642000459	592	tags=50%, list=19%, signal=40%	ACADSB/ACADM/ACADL/GCDH
GO:0052890	MF	GO:0052890	oxidoreductase activity, acting on the CH-CH group of donors, with a flavin as acceptor	8	0.591545092116766	1.31801222107262	0.132137030995106	0.747907265530585	0.724475642000459	592	tags=50%, list=19%, signal=40%	ACADSB/ACADM/ACADL/GCDH
GO:0046634	BP	GO:0046634	regulation of alpha-beta T cell activation	17	0.471960276185022	1.31721923101283	0.137161084529506	0.747907265530585	0.724475642000459	566	tags=35%, list=18%, signal=29%	PTPRC/SLC4A2/HMGB1/PNP/NCKAP1L/HSPH1
GO:0060368	BP	GO:0060368	regulation of Fc receptor mediated stimulatory signaling pathway	5	0.6760280849188	1.31687679179949	0.132669983416252	0.747907265530585	0.724475642000459	234	tags=40%, list=8%, signal=37%	PTPRC/CSK
GO:0061620	BP	GO:0061620	glycolytic process through glucose-6-phosphate	14	0.492680498217877	1.31679711454644	0.153724247226624	0.747907265530585	0.724475642000459	908	tags=57%, list=30%, signal=40%	PGK1/ENO1/PFKM/FOXK1/PKM/PFKP/ENO2/PFKL
GO:1902410	BP	GO:1902410	mitotic cytokinetic process	13	-0.474826500644614	-1.31615091778339	144	0.747907265530585	0.724475642000459	324	tags=38%, list=11%, signal=35%	CHMP6/ARF1/CHMP4C/CHMP1A/CHMP4B
GO:0004519	MF	GO:0004519	endonuclease activity	21	-0.425663764495633	-1.31605224343141	0.136871508379888	0.747907265530585	0.724475642000459	69	tags=43%, list=2%, signal=42%	ENDOD1/FEN1/INTS11/RAD50/PNKP/ERCC4/PPP1R8/EXOG/XRCC1
GO:0045171	CC	GO:0045171	intercellular bridge	16	-0.456905308983617	-1.3156532438039	0.134408602150538	0.747907265530585	0.724475642000459	404	tags=38%, list=13%, signal=33%	AAMP/PYCR3/OLFM4/QSOX1/TUBB6/SRA1
GO:0000963	BP	GO:0000963	mitochondrial RNA processing	7	0.609187676467019	1.31556240706519	0.14662273476112	0.747907265530585	0.724475642000459	307	tags=43%, list=10%, signal=39%	PUS1/HSD17B10/TRMT5
GO:0006779	BP	GO:0006779	porphyrin-containing compound biosynthetic process	8	-0.554082761837789	-1.31485682427355	0.161953727506427	0.747907265530585	0.724475642000459	913	tags=75%, list=30%, signal=53%	ABCB10/ABCB7/ATP5IF1/PGRMC1/SPTA1/ALAD
GO:0033014	BP	GO:0033014	tetrapyrrole biosynthetic process	8	-0.554082761837789	-1.31485682427355	0.161953727506427	0.747907265530585	0.724475642000459	913	tags=75%, list=30%, signal=53%	ABCB10/ABCB7/ATP5IF1/PGRMC1/SPTA1/ALAD
GO:0045667	BP	GO:0045667	regulation of osteoblast differentiation	15	0.481739477676841	1.313639992025	0.152037617554859	0.747907265530585	0.724475642000459	1065	tags=67%, list=35%, signal=44%	TCIRG1/CLIC1/PRKACA/LIMD1/ILK/PTK2/LTF/IPO7/DDX5/FERMT2
GO:0009083	BP	GO:0009083	branched-chain amino acid catabolic process	10	0.54329952204572	1.31346308498954	0.147909967845659	0.747907265530585	0.724475642000459	192	tags=30%, list=6%, signal=28%	ACADSB/ECHS1/HSD17B10
GO:0140662	MF	GO:0140662	ATP-dependent protein folding chaperone	20	0.452165500471108	1.30939742525913	0.130841121495327	0.747907265530585	0.724475642000459	1095	tags=67%, list=36%, signal=43%	HSP90AB1/CCT2/CCT3/TCP1/HSPH1/HSPA8/HSPD1/CCT5/CCT3/HSP90AA1/CCT8/CCT6A/CCT7/HSPA4
GO:0032615	BP	GO:0032615	interleukin-12 production	13	0.49979711826709	1.30935544483411	0.143540669856459	0.747907265530585	0.724475642000459	1232	tags=69%, list=40%, signal=42%	TRAF6/HMGB1/MAPK14/NFKB1/HSPD1/ACP5/LGALS9/CD47/IL16
GO:0032655	BP	GO:0032655	regulation of interleukin-12 production	13	0.49979711826709	1.30935544483411	0.143540669856459	0.747907265530585	0.724475642000459	1232	tags=69%, list=40%, signal=42%	TRAF6/HMGB1/MAPK14/NFKB1/HSPD1/ACP5/LGALS9/CD47/IL16
GO:0006007	BP	GO:0006007	glucose catabolic process	12	0.516162182271133	1.30887052077023	0.138933764135703	0.747907265530585	0.724475642000459	908	tags=67%, list=30%, signal=47%	PGK1/ENO1/PFKM/FOXK1/PKM/PFKP/ENO2/PFKL
GO:0006735	BP	GO:0006735	NADH regeneration	12	0.516162182271133	1.30887052077023	0.138933764135703	0.747907265530585	0.724475642000459	908	tags=67%, list=30%, signal=47%	PGK1/ENO1/PFKM/FOXK1/PKM/PFKP/ENO2/PFKL
GO:0061621	BP	GO:0061621	canonical glycolysis	12	0.516162182271133	1.30887052077023	0.138933764135703	0.747907265530585	0.724475642000459	908	tags=67%, list=30%, signal=47%	PGK1/ENO1/PFKM/FOXK1/PKM/PFKP/ENO2/PFKL
GO:0061718	BP	GO:0061718	glucose catabolic process to pyruvate	12	0.516162182271133	1.30887052077023	0.138933764135703	0.747907265530585	0.724475642000459	908	tags=67%, list=30%, signal=47%	PGK1/ENO1/PFKM/FOXK1/PKM/PFKP/ENO2/PFKL
GO:0031398	BP	GO:0031398	positive regulation of protein ubiquitination	19	0.457904424272704	1.30854342593438	0.138977635782748	0.747907265530585	0.724475642000459	407	tags=32%, list=13%, signal=28%	PDCD6/WFS1/AIMP2/TRAF6/DERL1/UBE2V1
GO:0071378	BP	GO:0071378	cellular response to growth hormone stimulus	7	0.605914978288306	1.30849489920201	0.153212520593081	0.747907265530585	0.724475642000459	653	tags=43%, list=21%, signal=34%	STAT5A/STAT6/PTK2
GO:0140142	MF	GO:0140142	nucleocytoplasmic carrier activity	14	0.489235284446496	1.30758902214262	0.161648177496038	0.747907265530585	0.724475642000459	152	tags=29%, list=5%, signal=27%	IPO5/NUTF2/XPO1/RAN
GO:0046051	BP	GO:0046051	UTP metabolic process	5	0.67085744564163	1.30680458471997	0.140961857379768	0.747907265530585	0.724475642000459	227	tags=40%, list=7%, signal=37%	NME2/NME1
GO:0031210	MF	GO:0031210	phosphatidylcholine binding	12	-0.482993372461942	-1.30642058614444	0.143603133159269	0.747907265530585	0.724475642000459	525	tags=42%, list=17%, signal=35%	ESYT2/JCHAIN/PITPNB/PCYT1A/APOA4
GO:0006693	BP	GO:0006693	prostaglandin metabolic process	14	0.488672282689696	1.30608427598051	0.161648177496038	0.747907265530585	0.724475642000459	257	tags=36%, list=8%, signal=33%	MIF/AKR1B1/ACOX1/PTGES3/CD74
GO:0010800	BP	GO:0010800	positive regulation of peptidyl-threonine phosphorylation	6	0.640261723562331	1.30584435819313	0.130148270181219	0.747907265530585	0.724475642000459	888	tags=67%, list=29%, signal=48%	CHI3L1/CAB39/CALM3/UBE2K
GO:0071639	BP	GO:0071639	positive regulation of monocyte chemotactic protein-1 production	4	0.716556107351923	1.3041581610809	0.132107023411371	0.747907265530585	0.724475642000459	45	tags=25%, list=1%, signal=25%	OAS1
GO:0016074	BP	GO:0016074	sno(s)RNA metabolic process	4	0.716302051606454	1.30369577038962	0.132107023411371	0.747907265530585	0.724475642000459	389	tags=50%, list=13%, signal=44%	FBL/EXOSC4
GO:0031126	BP	GO:0031126	sno(s)RNA 3'-end processing	4	0.716302051606454	1.30369577038962	0.132107023411371	0.747907265530585	0.724475642000459	389	tags=50%, list=13%, signal=44%	FBL/EXOSC4
GO:0043144	BP	GO:0043144	sno(s)RNA processing	4	0.716302051606454	1.30369577038962	0.132107023411371	0.747907265530585	0.724475642000459	389	tags=50%, list=13%, signal=44%	FBL/EXOSC4
GO:1903599	BP	GO:1903599	positive regulation of autophagy of mitochondrion	6	0.639183626275416	1.3036455272965	0.131795716639209	0.747907265530585	0.724475642000459	1103	tags=83%, list=36%, signal=54%	SLC25A4/PARK7/HTT/SLC25A5/VPS13D
GO:0051781	BP	GO:0051781	positive regulation of cell division	11	-0.494823333910332	-1.30318628938167	0.167979002624672	0.747907265530585	0.724475642000459	62	tags=18%, list=2%, signal=18%	YBX1/PKP4
GO:0005757	CC	GO:0005757	mitochondrial permeability transition pore complex	4	0.716005118885862	1.30315534204509	0.132107023411371	0.747907265530585	0.724475642000459	862	tags=75%, list=28%, signal=54%	SLC25A4/SPG7/SLC25A5
GO:0032069	BP	GO:0032069	regulation of nuclease activity	10	0.538998477707914	1.30306502142538	0.152733118971061	0.747907265530585	0.724475642000459	607	tags=40%, list=20%, signal=32%	OAS1/PCNA/HMGB1/OAS2
GO:2000403	BP	GO:2000403	positive regulation of lymphocyte migration	8	0.584764793019001	1.30290514438063	0.137030995106036	0.747907265530585	0.724475642000459	387	tags=38%, list=13%, signal=33%	WNK1/CXCL12/CORO1A
GO:2000406	BP	GO:2000406	positive regulation of T cell migration	8	0.584764793019001	1.30290514438063	0.137030995106036	0.747907265530585	0.724475642000459	387	tags=38%, list=13%, signal=33%	WNK1/CXCL12/CORO1A
GO:0001094	MF	GO:0001094	TFIID-class transcription factor complex binding	6	0.63881243971091	1.30288847457374	0.131795716639209	0.747907265530585	0.724475642000459	448	tags=50%, list=15%, signal=43%	FBL/RUVBL2/NOP58
GO:0009176	BP	GO:0009176	pyrimidine deoxyribonucleoside monophosphate metabolic process	6	0.638644509612251	1.30254597311874	0.131795716639209	0.747907265530585	0.724475642000459	1115	tags=100%, list=36%, signal=64%	TYMS/DPYD/DUT/SHMT1/UPP1/NT5C
GO:0032481	BP	GO:0032481	positive regulation of type I interferon production	27	0.41916498657041	1.3023806915096	0.1328125	0.747907265530585	0.724475642000459	1083	tags=59%, list=35%, signal=39%	OAS1/ISG15/STAT1/TRAF6/MYD88/OAS2/HSPD1/DDX3X/RIGI/HSP90AA1/DHX58/TRIM56/GAPDH/G3BP1/TOMM70/DHX9
GO:0034661	BP	GO:0034661	ncRNA catabolic process	13	0.497123552516694	1.30235130706609	0.148325358851675	0.747907265530585	0.724475642000459	935	tags=46%, list=30%, signal=32%	ELOC/ELOB/EXOSC4/MTREX/PELO/ELAC2
GO:0002082	BP	GO:0002082	regulation of oxidative phosphorylation	6	0.638349899991959	1.30194510273032	0.131795716639209	0.747907265530585	0.724475642000459	420	tags=50%, list=14%, signal=43%	COX7A2L/AK4/COX7A2
GO:1902305	BP	GO:1902305	regulation of sodium ion transmembrane transport	14	0.487022469728093	1.30167478756918	0.164817749603803	0.747907265530585	0.724475642000459	1285	tags=57%, list=42%, signal=33%	WNK1/SLMAP/SNTA1/ATP1A2/ACTN4/GPD1L/CHP1/YWHAH
GO:0042056	MF	GO:0042056	chemoattractant activity	6	0.638178292581794	1.3015951012229	0.131795716639209	0.747907265530585	0.724475642000459	319	tags=33%, list=10%, signal=30%	MIF/HMGB1
GO:0016505	MF	GO:0016505	peptidase activator activity involved in apoptotic process	8	-0.548293782219988	-1.30111938308191	0.167095115681234	0.747907265530585	0.724475642000459	50	tags=62%, list=2%, signal=62%	BCL2L13/CTSC/CASP1/APAF1/RPS27L
GO:0106002	CC	GO:0106002	mCRD-mediated mRNA stability complex	4	0.714821066599558	1.30100032384556	0.132107023411371	0.747907265530585	0.724475642000459	776	tags=75%, list=25%, signal=56%	HNRNPD/PABPC1/SYNCRIP
GO:0060765	BP	GO:0060765	regulation of androgen receptor signaling pathway	11	0.525642900719326	1.30092841241462	0.14975845410628	0.747907265530585	0.724475642000459	1143	tags=73%, list=37%, signal=46%	PARK7/HDAC6/PHB1/HDAC1/KDM1A/SMARCA4/DDX5/PKN1
GO:0006040	BP	GO:0006040	amino sugar metabolic process	13	0.496532137106922	1.30080193241257	0.148325358851675	0.747907265530585	0.724475642000459	318	tags=31%, list=10%, signal=28%	RENBP/CHI3L1/ALDH1A1/PGM3
GO:0005253	MF	GO:0005253	monoatomic anion channel activity	10	0.537940456526705	1.30050718415834	0.159163987138264	0.747907265530585	0.724475642000459	569	tags=45%, list=19%, signal=37%	CLIC2/CLCA1/CLIC1/VDAC2/CLIC4
GO:0034340	BP	GO:0034340	response to type I interferon	25	0.426138789910822	1.30023846084668	0.143759873617694	0.747907265530585	0.724475642000459	228	tags=19%, list=7%, signal=18%	MX1/MX1/OAS1/ISG15/STAT1
GO:1902991	BP	GO:1902991	regulation of amyloid precursor protein catabolic process	17	-0.444034080642988	-1.3002021984998	0.146666666666667	0.747907265530585	0.724475642000459	457	tags=56%, list=15%, signal=48%	SPON1/RELA/PICALM/ROCK1/RTN1/ROCK2/APOE/FKBP1A/FKBP1A/CASP3
GO:0071677	BP	GO:0071677	positive regulation of mononuclear cell migration	15	0.476758547700401	1.30005765319306	0.15987460815047	0.747907265530585	0.724475642000459	387	tags=27%, list=13%, signal=23%	WNK1/CXCL12/HMGB1/CORO1A
GO:0045839	BP	GO:0045839	negative regulation of mitotic nuclear division	10	-0.511510006354918	-1.29983883039719	0.16578947368421	0.747907265530585	0.724475642000459	914	tags=50%, list=30%, signal=35%	DYNC1LI1/ZNF207/TOM1L2/MAD1L1/TRIP13
GO:0051784	BP	GO:0051784	negative regulation of nuclear division	10	-0.511510006354918	-1.29983883039719	0.16578947368421	0.747907265530585	0.724475642000459	914	tags=50%, list=30%, signal=35%	DYNC1LI1/ZNF207/TOM1L2/MAD1L1/TRIP13
GO:0046598	BP	GO:0046598	positive regulation of viral entry into host cell	6	0.637223935019096	1.29964864340247	0.131795716639209	0.747907265530585	0.724475642000459	1086	tags=83%, list=35%, signal=54%	CD74/HMGB1/TRIM21/P4HB/LGALS9
GO:0075294	BP	GO:0075294	positive regulation by symbiont of entry into host	6	0.637223935019096	1.29964864340247	0.131795716639209	0.747907265530585	0.724475642000459	1086	tags=83%, list=35%, signal=54%	CD74/HMGB1/TRIM21/P4HB/LGALS9
GO:0032147	BP	GO:0032147	activation of protein kinase activity	13	0.495969726460019	1.29932854367974	0.149920255183413	0.747907265530585	0.724475642000459	416	tags=46%, list=14%, signal=40%	CHI3L1/TRAF6/ZFP91/PRRC1/PARK7/PPIA
GO:0022406	BP	GO:0022406	membrane docking	33	-0.379390891383348	-1.29897257805328	0.138028169014085	0.747907265530585	0.724475642000459	202	tags=27%, list=7%, signal=26%	ROCK1/EXOC5/ESYT2/EXOC2/STX7/VAPB/VAMP8/PEX16/RALB
GO:0071222	BP	GO:0071222	cellular response to lipopolysaccharide	42	-0.359446594677376	-1.29873570220153	0.133879781420765	0.747907265530585	0.724475642000459	76	tags=10%, list=2%, signal=9%	PLAA/BPI/CD68/CDK4
GO:0032890	BP	GO:0032890	regulation of organic acid transport	14	0.485823459892067	1.29847016977306	0.166402535657686	0.747907265530585	0.724475642000459	672	tags=43%, list=22%, signal=34%	MIF/ACSL1/FABP3/CES1/ATP1A2/PRKAA1
GO:0006376	BP	GO:0006376	mRNA splice site recognition	11	0.524437001015909	1.29794389729124	0.152979066022544	0.747907265530585	0.724475642000459	723	tags=45%, list=24%, signal=35%	SF3A3/SRSF6/PUF60/SF3A1/SF1
GO:0061351	BP	GO:0061351	neural precursor cell proliferation	20	0.448202559807747	1.29792139646956	0.135514018691589	0.747907265530585	0.724475642000459	752	tags=38%, list=24%, signal=29%	FLNA/DOCK7/NDUFS2/FLNA/ILK/RAB10/PAFAH1B1/KDM1A
GO:0055094	BP	GO:0055094	response to lipoprotein particle	12	-0.479741094573452	-1.29762368948367	0.143603133159269	0.747907265530585	0.724475642000459	377	tags=25%, list=12%, signal=22%	APOE/MIA3/CD68
GO:0071402	BP	GO:0071402	cellular response to lipoprotein particle stimulus	12	-0.479741094573452	-1.29762368948367	0.143603133159269	0.747907265530585	0.724475642000459	377	tags=25%, list=12%, signal=22%	APOE/MIA3/CD68
GO:1901836	BP	GO:1901836	regulation of transcription of nucleolar large rRNA by RNA polymerase I	6	0.635711958292603	1.29656489467074	0.13838550247117	0.747907265530585	0.724475642000459	1124	tags=100%, list=37%, signal=64%	NCL/MARS1/MACROH2A2/SMARCB1/SMARCA4/MTOR
GO:1902175	BP	GO:1902175	regulation of oxidative stress-induced intrinsic apoptotic signaling pathway	16	0.468605624572432	1.2958735041461	0.153968253968254	0.747907265530585	0.724475642000459	1216	tags=62%, list=40%, signal=38%	GPX1/HSPB1/PARK7/PPIA/SOD2/SOD1/P4HB/NONO/SFPQ/HTRA2
GO:0009713	BP	GO:0009713	catechol-containing compound biosynthetic process	4	0.711992513641378	1.29585225464817	0.133779264214047	0.747907265530585	0.724475642000459	362	tags=50%, list=12%, signal=44%	PARK7/DAO
GO:0042416	BP	GO:0042416	dopamine biosynthetic process	4	0.711992513641378	1.29585225464817	0.133779264214047	0.747907265530585	0.724475642000459	362	tags=50%, list=12%, signal=44%	PARK7/DAO
GO:0042423	BP	GO:0042423	catecholamine biosynthetic process	4	0.711992513641378	1.29585225464817	0.133779264214047	0.747907265530585	0.724475642000459	362	tags=50%, list=12%, signal=44%	PARK7/DAO
GO:0034708	CC	GO:0034708	methyltransferase complex	23	0.431425769183681	1.29578466666664	0.129485179407176	0.747907265530585	0.724475642000459	452	tags=30%, list=15%, signal=26%	ZC3H13/HSD17B10/RBBP4/ERH/VIRMA/RUVBL2/SNRPG
GO:0031929	BP	GO:0031929	TOR signaling	27	0.416966432653361	1.29554960050118	0.1375	0.747907265530585	0.724475642000459	1131	tags=52%, list=37%, signal=33%	RPS6/PDCD6/PRKACA/NCKAP1L/RPS6KB1/PRKAA1/CUL3/USP9X/YWHAZ/TSC2/OTUB1/RRAGB/MTOR/USP7
GO:0002418	BP	GO:0002418	immune response to tumor cell	4	0.711607337456591	1.2951512199913	0.133779264214047	0.747907265530585	0.724475642000459	617	tags=50%, list=20%, signal=40%	HMGB1/HSPD1
GO:0002834	BP	GO:0002834	regulation of response to tumor cell	4	0.711607337456591	1.2951512199913	0.133779264214047	0.747907265530585	0.724475642000459	617	tags=50%, list=20%, signal=40%	HMGB1/HSPD1
GO:0002837	BP	GO:0002837	regulation of immune response to tumor cell	4	0.711607337456591	1.2951512199913	0.133779264214047	0.747907265530585	0.724475642000459	617	tags=50%, list=20%, signal=40%	HMGB1/HSPD1
GO:0030904	CC	GO:0030904	retromer complex	12	0.510311283614494	1.29403396544959	0.148626817447496	0.747907265530585	0.724475642000459	402	tags=33%, list=13%, signal=29%	VPS26A/RAB7A/SNX3/SNX12
GO:0003841	MF	GO:0003841	1-acylglycerol-3-phosphate O-acyltransferase activity	4	0.710827091967246	1.29373114483999	0.137123745819398	0.747907265530585	0.724475642000459	127	tags=25%, list=4%, signal=24%	LCLAT1
GO:0016411	MF	GO:0016411	acylglycerol O-acyltransferase activity	4	0.710827091967246	1.29373114483999	0.137123745819398	0.747907265530585	0.724475642000459	127	tags=25%, list=4%, signal=24%	LCLAT1
GO:0042171	MF	GO:0042171	lysophosphatidic acid acyltransferase activity	4	0.710827091967246	1.29373114483999	0.137123745819398	0.747907265530585	0.724475642000459	127	tags=25%, list=4%, signal=24%	LCLAT1
GO:0071617	MF	GO:0071617	lysophospholipid acyltransferase activity	4	0.710827091967246	1.29373114483999	0.137123745819398	0.747907265530585	0.724475642000459	127	tags=25%, list=4%, signal=24%	LCLAT1
GO:0140894	BP	GO:0140894	endolysosomal toll-like receptor signaling pathway	16	0.467777624678407	1.2935837682406	0.153968253968254	0.747907265530585	0.724475642000459	439	tags=38%, list=14%, signal=32%	IKBKB/OAS1/TRAF6/WDFY1/HMGB1/MYD88
GO:0016410	MF	GO:0016410	N-acyltransferase activity	9	0.557329676730425	1.29328690274516	0.156451612903226	0.747907265530585	0.724475642000459	863	tags=56%, list=28%, signal=40%	TGM2/NMT1/GTF2B/NAA50/ABHD14B
GO:0018208	BP	GO:0018208	peptidyl-proline modification	12	-0.478059673902764	-1.29307571283761	0.148825065274151	0.747907265530585	0.724475642000459	226	tags=38%, list=7%, signal=36%	P4HA1/FKBP1A/CRTAP/FKBP10/FKBP1A
GO:0045910	BP	GO:0045910	negative regulation of DNA recombination	8	0.580332436276557	1.2930294807456	0.150081566068515	0.747907265530585	0.724475642000459	832	tags=75%, list=27%, signal=55%	H1-2/H1-3/H1-10/MSH3/MSH6/SMCHD1
GO:0141085	BP	GO:0141085	regulation of inflammasome-mediated signaling pathway	10	0.534820768723383	1.29296512936151	0.167202572347267	0.747907265530585	0.724475642000459	813	tags=45%, list=26%, signal=34%	BRCC3/MYD88/HSPA8/DDX3X/NEK7
GO:1900225	BP	GO:1900225	regulation of NLRP3 inflammasome complex assembly	10	0.534820768723383	1.29296512936151	0.167202572347267	0.747907265530585	0.724475642000459	813	tags=45%, list=26%, signal=34%	BRCC3/MYD88/HSPA8/DDX3X/NEK7
GO:0010749	BP	GO:0010749	regulation of nitric oxide mediated signal transduction	4	0.709671418736884	1.2916277775538	0.137123745819398	0.747907265530585	0.724475642000459	92	tags=25%, list=3%, signal=24%	SPINK1
GO:0007008	BP	GO:0007008	outer mitochondrial membrane organization	9	0.556509905341693	1.29138461825438	0.159677419354839	0.747907265530585	0.724475642000459	1095	tags=78%, list=36%, signal=50%	TOMM40/PDCD5/TOMM7/SAMM50/HSP90AA1/TOMM70/HSPA4
GO:0045040	BP	GO:0045040	protein insertion into mitochondrial outer membrane	9	0.556509905341693	1.29138461825438	0.159677419354839	0.747907265530585	0.724475642000459	1095	tags=78%, list=36%, signal=50%	TOMM40/PDCD5/TOMM7/SAMM50/HSP90AA1/TOMM70/HSPA4
GO:1901797	BP	GO:1901797	negative regulation of signal transduction by p53 class mediator	6	0.633027082158413	1.29108896159017	0.14497528830313	0.747907265530585	0.724475642000459	752	tags=83%, list=24%, signal=63%	MIF/CD74/ARMC10/CD44/KDM1A
GO:1902254	BP	GO:1902254	negative regulation of intrinsic apoptotic signaling pathway by p53 class mediator	6	0.633027082158413	1.29108896159017	0.14497528830313	0.747907265530585	0.724475642000459	752	tags=83%, list=24%, signal=63%	MIF/CD74/ARMC10/CD44/KDM1A
GO:0001223	MF	GO:0001223	transcription coactivator binding	5	0.662662522904482	1.29084118940565	0.15257048092869	0.747907265530585	0.724475642000459	557	tags=60%, list=18%, signal=49%	STAT1/TFAM/STAT6
GO:0072530	BP	GO:0072530	purine-containing compound transmembrane transport	4	0.70899789946105	1.2904019479904	0.140468227424749	0.747907265530585	0.724475642000459	862	tags=50%, list=28%, signal=36%	SLC25A4/SLC25A5
GO:1901679	BP	GO:1901679	nucleotide transmembrane transport	4	0.70899789946105	1.2904019479904	0.140468227424749	0.747907265530585	0.724475642000459	862	tags=50%, list=28%, signal=36%	SLC25A4/SLC25A5
GO:0050954	BP	GO:0050954	sensory perception of mechanical stimulus	26	-0.389978623138408	-1.28839186288682	0.159340659340659	0.747907265530585	0.724475642000459	439	tags=38%, list=14%, signal=33%	MYH14/USH1C/MYO6/ALDH7A1/EML2/NDUFB9/NHERF1/COL1A1/CASP3/COL2A1
GO:0044291	CC	GO:0044291	cell-cell contact zone	25	-0.393257929440573	-1.28743344809157	0.154471544715447	0.747907265530585	0.724475642000459	430	tags=24%, list=14%, signal=21%	AFDN/PKP2/FLOT1/AHNAK/DSG2/PKP4
GO:1902808	BP	GO:1902808	positive regulation of cell cycle G1/S phase transition	12	-0.475924530306047	-1.28730048752778	0.156657963446475	0.747907265530585	0.724475642000459	130	tags=50%, list=4%, signal=48%	PLCG2/RRM1/CDC73/EIF4G1/RRM2/DDRGK1
GO:1901798	BP	GO:1901798	positive regulation of signal transduction by p53 class mediator	9	0.554494231743904	1.28670723541785	0.162903225806452	0.747907265530585	0.724475642000459	695	tags=44%, list=23%, signal=35%	RPL26/RPL11/RPS7/EIF5A
GO:1901992	BP	GO:1901992	positive regulation of mitotic cell cycle phase transition	18	-0.431313985819732	-1.28597525241176	0.152230971128609	0.747907265530585	0.724475642000459	267	tags=33%, list=9%, signal=31%	RRM2B/BRD4/SIN3A/EIF4G1/RRM2/CDK4
GO:0007173	BP	GO:0007173	epidermal growth factor receptor signaling pathway	29	-0.382148264841906	-1.28583564410684	0.153005464480874	0.747907265530585	0.724475642000459	409	tags=34%, list=13%, signal=30%	AGT/CHMP6/PLCG1/HIP1/VIL1/MMP9/ERBB2/PIGR/ADRA2A/RALB
[truncated: 6,361 more rows]
