# Supplementary material for: Tolerability and effect of inhibiting microfibrillar-associated protein 4 in small intestinal anastomotic healing
Source: Research Square preprint supplement (doi:10.21203/rs.3.rs-7132995/v1), 2025-09-11
Supplement: Supplementary file 3 [file a0476156ac084d9ed745b8b0.xlsx]

## Sheet: Sheet 1
	Uniprot	symbol	Description	Anakinra_01	Anakinra_02	Anakinra_03	Anakinra_04	Anakinra_05	Anakinra_06	Anakinra_07	Anakinra_08	Anakinra_09	AS0326_01	AS0326_02	AS0326_03	AS0326_04	AS0326_05	AS0326_06	AS0326_07	AS0326_08	AS0326_09	Vehicle_01	Vehicle_02	Vehicle_03	Vehicle_04	Vehicle_05	Vehicle_06	Vehicle_07	Vehicle_08	Vehicle_09	count_Anakinra	count_AS0326	count_Vehicle	fc_Anakinra	p_Anakinra	log2_fc_Anakinra	mlog10_p_Anakinra	fc_AS0326	p_AS0326	log2_fc_AS0326	mlog10_p_AS0326
91	F1RSE6	PRKDC	DNA-dependent protein kinase catalytic subunit OS=Sus scrofa OX=9823 GN=PRKDC PE=3 SV=2	0.937	1.054	1.09	1.294	0.952	0.8	0.867	0.906	0.904	0.788	0.919	0.849	0.946	0.611	0.756	0.985	0.941	0.814	1.007	1.09	1.039	1.242	1.24	1.103	1.015	0.949	1.099	9	9	9	0.899836	0.0890878	-0.152265	1.05018	0.777698	0.000268755	-0.362718	3.57064
570	A0A5G2R4G4	CSNK2A1	Casein kinase II subunit alpha OS=Sus scrofa OX=9823 GN=CSNK2A1 PE=1 SV=1	1.07	0.97	1.004	1.005	1.033	0.923	1.014	1.16	1.143	1.002	0.999	0.918	0.955	0.905	0.962	0.973	0.966	0.937	1.037	1.059	1.045	0.956	1.102	1.04	1.001	1.031	0.971	9	9	9	1.00866	0.769824	0.0124344	0.113609	0.932374	0.00204948	-0.101019	2.68836
1170	F1RJ68	OLFM4	Olfactomedin 4 OS=Sus scrofa OX=9823 GN=OLFM4 PE=1 SV=1	1.067	1.084	0.894	0.863	0.939	0.86	0.97	0.821	0.831	1.208	1.29	1.19	1.172	1.075	0.978	1.231	1.334	1.17	1.115	0.919	1.111	1.005	0.973	1.012	1.182	0.785	0.956	9	9	9	0.919519	0.135412	-0.121049	0.868344	1.17554	0.00448681	0.233318	2.34806
1841	I3LFV9	AKAP9	A-kinase anchoring protein 9 OS=Sus scrofa OX=9823 GN=AKAP9 PE=1 SV=4	1.099	1.032	0.992	1.029	1.015	1.006	1.117	1.105	1.144	1.045	0.917	0.895	0.969	0.892	0.953	1.029	1.037	0.985	1.031	1.038	1.105	1.049	0.964	1.126	1.102	0.991	1.049	9	9	9	1.00888	0.722611	0.0127606	0.141095	0.922475	0.00780421	-0.116418	2.10767
107	A0A286ZYH0	SIGLEC1	Sialic acid binding Ig like lectin 1 OS=Sus scrofa OX=9823 GN=SIGLEC1 PE=1 SV=2	0.966	1.087	1.187	1.106	0.904	1.059	1.07	1.065	1.147	0.979	0.884	1.036	0.963	0.869	0.887	0.941	1.126	0.901	1.034	1.256	0.961	0.987	1.275	1.155	1.019	1.044	1.184	9	9	9	0.967322	0.471381	-0.0479315	0.326627	0.865961	0.00822928	-0.207627	2.08464
66	A0A8D0YSZ7	PKM	Pyruvate kinase OS=Sus scrofa OX=9823 GN=PKM PE=1 SV=1	0.983	0.953	1.003	1.044	1.023	1.04	1.018	1.068	1.071	1.04	0.987	1.004	1.037	1.035	0.969	0.998	0.993	0.987	0.993	0.933	0.948	0.92	0.986	0.964	1.013	0.967	0.988	9	9	9	1.05636	0.00450917	0.0791003	2.3459	1.0388	0.0120915	0.0549138	1.91752
560	A0A5S6H0X2	S100A12	S100 calcium binding protein A12 OS=Sus scrofa OX=9823 GN=S100A12 PE=3 SV=1	0.843	1.065	0.77	1.093	0.905	1.103	0.943	1.042	1.054	1.021	1.013	1.233	1.004	1.196	1.114	1.753	1.239	0.989	0.731	0.737	0.857	1.021	0.834	0.904	1.202	0.987	0.856	9	9	9	1.08476	0.246748	0.117374	0.607746	1.2993	0.0126928	0.377733	1.89644
121	A0A5G2QU73	LOC110255221	Uncharacterized protein OS=Sus scrofa OX=9823 GN=LOC110255221 PE=3 SV=1	1.068	0.832	0.827	1.211	1.085	0.867	0.747	1.033	0.884	1.244	1.073	1.378	1.043	1.304	1.04	1.646	1.492	0.772	0.856	1.023	1.06	1.1	0.533	0.335	1.137	0.78	0.971	9	9	9	1.09737	0.435875	0.13405	0.360638	1.41013	0.0133995	0.495833	1.87291
2919	A0A286ZYE7	HNRNPDL	Heterogeneous nuclear ribonucleoprotein D-like isoform a OS=Sus scrofa OX=9823 GN=HNRNPDL PE=1 SV=2	0.824	1.014	1.028	1.118	1.134	0.903	1.116	1.271	1.176	0.967	0.884	0.92	0.935	0.808	0.908	0.938	1.031	1.112	1.023	1.121	0.967	0.964	1.137	1.044	1.113	0.989	1.064	9	9	9	1.01719	0.731474	0.0245946	0.135801	0.902462	0.0135113	-0.148061	1.8693
736	K9J4V0	SNRNP200	U5 small nuclear ribonucleoprotein 200 kDa helicase OS=Sus scrofa OX=9823 GN=SNRNP200 PE=1 SV=1	1.078	1.05	1.055	0.97	0.971	0.933	1.032	1.087	1.081	1.03	0.961	0.954	0.965	0.85	0.919	0.965	0.992	0.928	1.026	1	1.069	0.966	1.02	0.996	1.006	0.976	1.005	9	9	9	1.02129	0.33493	0.0303969	0.475046	0.944837	0.0136129	-0.0818631	1.86605
1099	P53590	SUCLG2	Succinate--CoA ligase [GDP-forming] subunit beta, mitochondrial (Fragment) OS=Sus scrofa OX=9823 GN=SUCLG2 PE=1 SV=2	0.969	0.934	1.04	1.03	1.052	1.023	1.01	0.987	1.024	0.917	0.851	0.927	1.012	0.951	0.92	0.998	0.904	0.931	0.988	0.946	0.993	1.02	1.169	1.011	1.045	0.967	0.961	9	9	9	0.996593	0.894974	-0.00492307	0.0481895	0.924286	0.0142347	-0.113589	1.84665
603	A0A287AEW7	TWF1	Twinfilin-1 OS=Sus scrofa OX=9823 GN=TWF1 PE=1 SV=2	1.114	1.04	1.074	1.017	0.975	1.101	1.105	1.016	0.965	1.05	1.124	1.055	1.01	1.177	1.13	1.09	1.031	1.106	0.973	1.026	1.022	0.855	0.834	0.939	1.061	1.133	0.999	9	9	9	1.0639	0.112877	0.089362	0.947395	1.10529	0.014451	0.144429	1.8401
424	F1SMS8	LMAN1	Lectin, mannose binding 1 OS=Sus scrofa OX=9823 GN=LMAN1 PE=1 SV=2	1.058	0.872	0.929	0.964	0.964	0.771	0.955	1.092	1.074	0.935	0.858	0.852	0.985	0.832	0.932	1.026	0.974	1.018	1.063	0.967	0.962	1.036	1.113	0.998	1.1	1.06	0.917	9	9	9	0.941732	0.166676	-0.0866119	0.778126	0.91276	0.0156721	-0.131692	1.80487
2790	F1SFL7	TRNT1	tRNA nucleotidyl transferase 1 OS=Sus scrofa OX=9823 GN=TRNT1 PE=1 SV=1	0.876	1.072	0.986	0.927	1.064	1.307	0.942	0.994	0.984	0.902	0.873	0.913	0.907	0.832	0.826	1.021	0.906	0.914	0.863	1.076	0.962	0.997	1.011	1.034	0.929	0.947	1.196	9	9	9	1.0152	0.776152	0.0217596	0.110053	0.897837	0.0164054	-0.155475	1.78501
25	A0A287BAK1	TLN1	Talin 1 OS=Sus scrofa OX=9823 GN=TLN1 PE=1 SV=2	0.978	0.962	1.043	0.977	1.027	1.023	1.012	1.058	0.938	0.983	0.989	1.013	1.025	1.041	0.998	0.972	1.023	1.045	0.991	1.023	0.965	0.909	0.994	0.925	1.012	0.939	0.95	9	9	9	1.0356	0.0861728	0.0504661	1.06463	1.04375	0.0183185	0.0617802	1.73711
312	A0A5S8KLN1	CLU	Clusterin OS=Sus scrofa OX=9823 GN=CLU PE=3 SV=1	1.093	1.156	1.072	1.022	1.002	0.905	0.975	1.069	1.112	1.148	1.173	0.92	1.048	1.138	1.161	1.025	1.026	0.964	0.953	1.074	0.981	0.918	0.912	0.935	0.977	0.996	1.005	9	9	9	1.07485	0.0327051	0.104133	1.48539	1.09736	0.0186009	0.134037	1.73047
2971	F1RIA7	TMEM109	Transmembrane protein 109 OS=Sus scrofa OX=9823 GN=TMEM109 PE=1 SV=1	1.04	0.931	0.866	0.785	0.984	0.796	1	0.776	0.8	1.019	1.123	1.153	1.061	1.03	1.012	0.893	1.001	1.129	0.972	0.902	1.088	0.994	0.995	0.874	0.91	0.99	0.825	9	9	9	0.933099	0.165687	-0.0998973	0.78071	1.10187	0.020745	0.139956	1.68309
2032	F1RSJ8	FTSJ3	pre-rRNA processing protein FTSJ3 OS=Sus scrofa OX=9823 GN=FTSJ3 PE=1 SV=2	1.033	0.834	0.918	1.079	1.206	0.913	1.069	1.026	1.167	1.065	0.826	0.878	0.969	0.776	0.834	0.976	1.036	0.936	0.883	1.042	0.892	1.311	1.184	1.117	1.033	1.006	1.149	9	9	9	0.961318	0.510009	-0.0569136	0.292422	0.862639	0.0209328	-0.213171	1.67917
1587	A0A8W4FKQ8	ARF5	ADP-ribosylation factor OS=Sus scrofa OX=9823 GN=ARF5 PE=1 SV=1	1.173	1.075	0.758	0.941	0.932	1.009	0.861	1.181	1.264	1.028	0.844	0.844	0.959	0.797	0.914	0.999	0.894	1.095	1.114	1.162	1.144	0.955	1.111	0.922	0.937	0.969	1.283	9	9	9	0.958008	0.527983	-0.0618908	0.27738	0.872564	0.0215186	-0.196667	1.66719
95	A0A480ELA5	TMEM178B	Transmembrane protein 178B OS=Sus scrofa OX=9823 GN=TMEM178B PE=3 SV=1	0.933	0.74	0.989	0.935	0.928	1.191	1.031	0.992	0.999	0.972	0.931	0.816	0.971	1.182	1.141	1.078	1.071	1.044	0.897	1.064	0.858	0.849	0.847	0.75	1.038	0.928	0.614	9	9	9	1.11383	0.120251	0.15553	0.91991	1.17349	0.0217171	0.230801	1.6632
2561	A0A286ZWZ5	DARS2	Aspartyl-tRNA synthetase 2, mitochondrial OS=Sus scrofa OX=9823 GN=DARS2 PE=3 SV=3	0.822	0.893	0.976	1.367	1.335	0.763	0.99	1.128	1.061	0.802	0.857	0.839	0.994	0.702	0.985	0.893	0.948	0.929	1.094	0.96	0.886	1.106	1.461	1.185	0.936	0.882	1.062	9	9	9	0.97524	0.780542	-0.0361704	0.107604	0.830443	0.0219256	-0.268047	1.65905
15	F1RQQ8	PYGM	Alpha-1,4 glucan phosphorylase OS=Sus scrofa OX=9823 GN=PYGM PE=1 SV=3	0.778	0.996	1.203	0.969	0.997	1.076	1.023	1.046	1.023	0.888	0.99	0.94	1.029	1.077	1.08	0.944	1.071	1.077	0.93	1.062	0.911	0.812	0.793	0.834	1.045	0.832	0.939	9	9	9	1.11682	0.048568	0.159394	1.31365	1.11498	0.0223451	0.157017	1.65082
9	P02540	DES	Desmin OS=Sus scrofa OX=9823 GN=DES PE=1 SV=4	0.703	0.958	1.081	0.956	0.974	1.102	0.977	1.008	0.958	0.887	1.045	0.936	1.015	1.237	1.151	0.961	1.098	1.116	0.896	1.181	0.906	0.765	0.56	0.891	0.982	0.732	0.957	9	9	9	1.10762	0.197879	0.147468	0.703601	1.20025	0.0245815	0.26334	1.60939
1396	A0A5G2QVN7	FKBP4	peptidylprolyl isomerase OS=Sus scrofa OX=9823 GN=FKBP4 PE=1 SV=1	1.001	1.196	1.134	0.875	0.978	1.006	0.996	1.068	1.08	1.068	0.784	0.882	0.918	0.959	0.919	0.965	0.964	0.919	1.022	1.003	0.969	0.996	1.205	0.976	0.948	0.999	1.051	9	9	9	1.018	0.656141	0.0257311	0.183003	0.913731	0.0260438	-0.130159	1.5843
1256	F1STI9	ENDOD1	Endonuclease domain containing 1 OS=Sus scrofa OX=9823 GN=ENDOD1 PE=1 SV=1	0.971	1.158	1.166	1.07	0.96	0.738	1.176	1.166	1.067	0.959	1.063	0.986	0.986	0.823	0.923	1.019	1.053	1.129	1.086	1.002	1.072	1.129	1.102	1.074	1.04	1.042	1.156	9	9	9	0.976193	0.623614	-0.0347618	0.205084	0.921468	0.0261012	-0.117995	1.58334
263	I3LD80	CUL9	Cullin 9 OS=Sus scrofa OX=9823 GN=CUL9 PE=3 SV=4	0.814	0.789	1.035	0.778	0.932	1.249	0.969	0.806	0.777	0.895	0.874	0.886	1.053	1.551	1.105	1.03	1.046	1.118	0.74	1.206	0.769	0.718	0.576	0.556	1.128	0.933	0.66	9	9	9	1.11845	0.323942	0.161496	0.489533	1.31183	0.026785	0.391582	1.57211
462	I3L7Z6	S100A6	Protein S100 OS=Sus scrofa OX=9823 GN=S100A6 PE=3 SV=2	1.077	0.982	0.945	0.626	0.925	0.9	1.009	0.834	0.728	0.949	1.233	1.075	1.141	1.177	0.886	0.974	0.993	1.263	0.952	0.894	1.049	0.992	0.818	0.481	1.012	0.978	0.916	9	9	9	0.991844	0.922459	-0.0118152	0.0350531	1.1976	0.0268414	0.260149	1.57119
431	A0A287AM88	LOXL2	Lysyl oxidase homolog OS=Sus scrofa OX=9823 GN=LOXL2 PE=3 SV=2	0.836	0.847	1.061	1.429	1.168	1.009	0.848	0.935	0.967	0.957	1.161	1.282	1.1	1.264	1.495	1.18	1.19	1.055	0.831	0.928	1.13	0.824	0.984	1.113	1.066	1.289	0.948	9	9	9	0.998573	0.986079	-0.00205952	0.00608817	1.17239	0.0273722	0.229454	1.56269
2850	A0A8D1KQS4	GPX2	Glutathione peroxidase OS=Sus scrofa OX=9823 GN=GPX2 PE=1 SV=1	1.22	0.963	0.99	1.022	1.008	1.19	1.04	1.122	1.196	1.029	0.873	0.98	0.979	1.045	0.99	0.978	0.959	1.021	1.029	1.122	1.182	1.01	1.132	1.089	1.072	0.925	0.992	9	9	9	1.02073	0.611951	0.0295963	0.213283	0.926829	0.0277432	-0.109624	1.55684
49	F1S050	SLTM	SAFB like transcription modulator OS=Sus scrofa OX=9823 GN=SLTM PE=1 SV=3	0.961	1.015	0.997	0.989	0.798	0.772	1.032	0.988	0.748	1.042	0.929	0.98	0.833	0.649	0.711	0.858	0.892	1.005	1.166	0.969	1.117	0.977	1.082	1.121	0.874	0.873	1.575	9	9	9	0.850933	0.0678061	-0.232883	1.16873	0.809822	0.0278813	-0.304324	1.55469
23	A0A4X1SYU3	TAGLN	Transgelin OS=Sus scrofa OX=9823 GN=TAGLN PE=1 SV=1	0.82	1.017	1.155	0.909	1.086	1.175	0.99	1.124	0.923	0.958	1.036	0.986	1.039	1.252	1.023	0.911	1.03	1.127	1.001	1.021	0.941	0.916	0.78	0.744	1.092	0.861	0.92	9	9	9	1.11153	0.082768	0.152543	1.08214	1.13122	0.028377	0.177883	1.54703
2765	F1RGX2	FAM234A	Family with sequence similarity 234 member A OS=Sus scrofa OX=9823 GN=FAM234A PE=1 SV=1	0.962	0.929	0.941	1.1	1.196	1.246	1.014	1.063	1.145	0.961	1.079	0.942	0.894	1.024	1.016	1.077	1.054	0.96	1.038	1.147	1.119	0.914	1.268	1.221	1.011	1.062	1.169	9	9	9	0.964519	0.470122	-0.0521184	0.32779	0.905317	0.0292911	-0.143505	1.53326
596	I3LPW1	BSPRY	B box and SPRY domain-containing protein isoform 2 OS=Sus scrofa OX=9823 GN=BSPRY PE=4 SV=2	0.958	0.989	0.885	0.907	0.87	0.94	0.884	0.996	0.933	0.916	0.879	0.814	0.907	0.967	0.854	0.95	0.923	0.915	0.998	1.016	0.895	1.157	0.978	1.005	0.897	0.927	0.939	9	9	9	0.948933	0.131242	-0.0756215	0.881926	0.922038	0.0295242	-0.117102	1.52982
97	A0A287A5X0	LOC100157017	Glyoxylate reductase/hydroxypyruvate reductase OS=Sus scrofa OX=9823 GN=LOC100157017 PE=1 SV=1	1.088	0.896	0.943	1.024	1.324	1.099	0.965	0.935	0.998	1.05	0.972	0.953	1.223	1.317	1.25	0.753	0.87	0.817	0.746	1.042	0.957	0.891	0.832	0.87	0.687	0.726	0.738	9	9	9	1.23808	0.00386139	0.308107	2.41326	1.22914	0.0295647	0.297645	1.52923
933	I3LSP1	METAP2	Methionine aminopeptidase 2 OS=Sus scrofa OX=9823 GN=METAP2 PE=1 SV=2	1.2	1.033	0.92	1.182	1.093	1.18	1.024	1.045	1.086	1.001	1.088	1.027	0.946	0.911	0.83	0.999	0.958	0.833	0.979	1.033	1.068	1.002	1.176	1.071	0.951	0.993	1.139	9	9	9	1.03729	0.338141	0.0528232	0.470902	0.912983	0.0298694	-0.131339	1.52477
460	A0A287BJ85	IRGQ	Immunity related GTPase Q OS=Sus scrofa OX=9823 GN=IRGQ PE=1 SV=1	1.035	1.092	1.35	0.997	1.028	1.011	0.961	1.114	1.177	1.049	1	1.077	1.187	1.196	1.066	0.995	1.061	1.011	1.028	0.994	1.11	0.757	1	0.786	0.989	0.988	1.003	9	9	9	1.12825	0.0398513	0.174086	1.39956	1.11404	0.0305353	0.155799	1.5152
1901	A0A286ZQK4	CELF2	CUGBP Elav-like family member 2 OS=Sus scrofa OX=9823 GN=CELF2 PE=3 SV=3	1.105	1.037	0.998	0.871	1.038	0.56	1.025	1.228	1.065	0.99	0.774	0.84	0.909	0.465	0.645	0.805	0.984	0.981	0.961	1.05	0.952	0.812	1.182	1.06	0.9	0.861	1.337	9	9	9	0.979375	0.805335	-0.0300672	0.0940235	0.811081	0.0306814	-0.302083	1.51312
37	A0A8W4FDI2	ETFDH	Electron transfer flavoprotein-ubiquinone oxidoreductase OS=Sus scrofa OX=9823 GN=ETFDH PE=1 SV=1	1.023	0.903	0.996	1.094	1.099	0.939	0.982	0.998	1.024	0.932	0.926	0.947	1.054	1.002	0.981	0.916	0.911	0.937	1.081	1.106	1.046	0.933	1.221	1.158	0.987	0.884	1.051	9	9	9	0.956797	0.291363	-0.0637148	0.535566	0.909052	0.0310775	-0.137564	1.50755
105	Q06AA7	TRA2B	TRA2B OS=Sus scrofa OX=9823 GN=TRA2B PE=1 SV=1	0.963	1.184	1.094	0.972	0.958	0.755	1.051	1.036	0.983	0.883	0.827	1.019	0.981	0.712	0.84	0.859	0.925	0.91	1.065	0.92	1.121	0.892	1.044	0.944	0.911	0.895	1.048	9	9	9	1.01765	0.727302	0.0252373	0.138285	0.9	0.031965	-0.152003	1.49533
92	A0A5G2R934	AHCYL2	Adenosylhomocysteinase like 2 OS=Sus scrofa OX=9823 GN=AHCYL2 PE=1 SV=2	1.298	1.131	1.146	1.147	1.134	1.244	1.015	1.05	0.999	1.063	0.912	1.149	1.014	0.981	0.994	0.992	0.946	0.985	1.239	0.965	1.102	1.101	1.18	1.239	0.977	1.145	0.996	9	9	9	1.02212	0.621394	0.0315701	0.206633	0.908689	0.0320488	-0.138142	1.49419
106	F1SRU2	ZYX	Zyxin OS=Sus scrofa OX=9823 GN=ZYX PE=1 SV=2	0.95	1.111	1.133	0.958	1.013	1.007	1.04	0.892	0.905	1.014	1.077	1.025	1.073	1.124	1.007	0.939	1.08	1.234	0.997	1.109	1.02	0.957	0.873	0.823	1.007	1.04	0.839	9	9	9	1.0397	0.388114	0.0561672	0.411041	1.10479	0.032223	0.143771	1.49183
1394	F2Z543	PHB1	Prohibitin OS=Sus scrofa OX=9823 GN=PHB1 PE=1 SV=3	1.062	1.02	0.953	0.982	0.987	1.129	1.05	0.931	0.891	1.001	0.968	0.981	1.035	1.035	0.976	0.938	1.008	0.983	0.974	0.981	0.956	0.901	0.92	0.929	0.984	1.003	0.831	9	9	9	1.06204	0.0723768	0.0868322	1.1404	1.0526	0.0325105	0.073958	1.48798
12	P26234	VCL	Vinculin OS=Sus scrofa OX=9823 GN=VCL PE=1 SV=4	0.876	0.94	1.058	0.956	1.034	1.005	0.975	1.015	0.953	0.922	1.001	0.996	1.018	1.097	1.003	0.937	1.019	1.102	0.986	1.091	0.929	0.905	0.821	0.936	0.968	0.882	0.887	9	9	9	1.04842	0.172817	0.0682217	0.762412	1.08209	0.0326743	0.113826	1.48579
1497	A0A4X1T454	SLIRP	SRA stem-loop interacting RNA binding protein OS=Sus scrofa OX=9823 GN=SLIRP PE=1 SV=1	1.006	1.169	1.137	1.237	1.244	1.1	1	1.128	1	1.01	1.015	0.902	1.083	0.912	1.09	0.92	0.948	0.914	0.988	0.963	1.044	0.969	1.251	1.161	1.005	1.26	1.146	9	9	9	1.02391	0.617284	0.0340879	0.209515	0.898539	0.0342623	-0.154347	1.46518
2835	F1RIE0	MESD	LRP chaperone MESD OS=Sus scrofa OX=9823 GN=MESD PE=1 SV=1	1.165	1.1	1.095	0.976	1.193	0.782	0.989	1.019	1.014	1.116	0.98	1.056	0.967	0.771	0.901	0.985	0.972	0.892	0.969	1.022	1.081	1.213	1.284	0.995	1.062	1	1.026	9	9	9	0.96695	0.522391	-0.048487	0.282004	0.895151	0.034335	-0.159797	1.46426
1580	A0A5G2QZZ3	LOC110258364	LIM zinc-binding domain-containing protein OS=Sus scrofa OX=9823 GN=LOC110258364 PE=4 SV=2	1.124	0.935	1.017	0.937	1.243	0.603	1.041	0.98	0.949	0.966	0.906	0.964	0.912	0.598	0.619	0.829	0.894	0.861	1.147	1.037	1.044	0.79	1.15	0.838	1.154	0.95	0.828	9	9	9	0.987805	0.875319	-0.017702	0.0578337	0.844596	0.0354583	-0.243666	1.45028
1864	A0A5G2R218	ALYREF	Aly/REF export factor OS=Sus scrofa OX=9823 GN=ALYREF PE=1 SV=1	1.025	1.08	0.904	1.071	1.184	0.668	0.96	0.996	1.085	1.081	0.87	0.911	1.086	0.644	0.825	0.812	0.92	0.894	1.162	0.96	0.966	0.93	1.155	1.112	0.926	0.885	1.203	9	9	9	0.964942	0.579303	-0.0514852	0.237094	0.864932	0.036217	-0.209342	1.44109
1327	A0A287A012	VMA21	Vacuolar ATPase assembly factor VMA21 OS=Sus scrofa OX=9823 GN=VMA21 PE=1 SV=2	0.852	1.061	1.182	0.972	0.836	1.129	0.924	0.875	0.871	1.117	1	1.114	0.962	1.536	1.324	1.16	0.955	1.16	0.922	1.198	1.038	0.957	0.848	0.961	1.041	1.064	0.699	9	9	9	0.997021	0.964422	-0.00430408	0.0157329	1.18332	0.0379478	0.242838	1.42081
181	A0A5S6GXN2	CDC42	Cell division cycle 42 OS=Sus scrofa OX=9823 GN=CDC42 PE=4 SV=1	1.356	0.866	0.828	0.812	0.954	0.805	0.991	0.883	0.791	1.036	1.215	1.272	1.185	0.853	0.815	0.831	1.01	1.186	1.015	0.881	1.076	0.859	0.754	0.78	0.813	1.005	0.716	9	9	9	1.04899	0.563262	0.0690058	0.249289	1.1904	0.0382432	0.251451	1.41745
248	F1SN67	FBN1	Fibrillin 1 OS=Sus scrofa OX=9823 GN=FBN1 PE=1 SV=3	0.856	0.972	1.028	0.994	1.061	0.885	1.039	1.09	0.937	0.888	0.982	0.899	1.023	0.969	1.038	1.029	1.021	0.895	1.069	1.106	0.93	1.144	0.976	1.033	1.047	0.979	1.092	9	9	9	0.945179	0.125083	-0.0813402	0.9028	0.932594	0.03857	-0.100679	1.41375
483	A0A5G2QNH5	GRK2	G protein-coupled receptor kinase OS=Sus scrofa OX=9823 GN=GRK2 PE=1 SV=2	1.064	1.103	1.158	1.164	1.014	1.1	1.051	0.938	1.052	1.006	0.971	0.912	0.969	0.934	1.003	0.981	1.06	0.93	1.03	0.958	1.116	1.047	1.267	1.148	1.031	1.02	0.933	9	9	9	1.00984	0.80458	0.0141309	0.0944309	0.917906	0.0396024	-0.123582	1.40228
695	K7GME6	S100A9	Protein S100-A9 OS=Sus scrofa OX=9823 GN=S100A9 PE=1 SV=1	0.97	1.206	1	1.124	0.871	1.152	0.93	1.018	1.003	1.017	0.923	1.062	0.807	1.297	1.259	1.762	1.34	0.94	0.651	0.929	0.835	1.085	0.925	0.716	1.203	0.899	0.844	9	9	9	1.14678	0.0707522	0.197587	1.15026	1.28688	0.0396714	0.363878	1.40152
11	A0A287BCP0	TPM1	Tropomyosin 1 OS=Sus scrofa OX=9823 GN=TPM1 PE=1 SV=3	0.653	0.964	1.186	0.741	1.049	0.897	1.046	1.244	1.02	0.881	1.114	1	1.076	1.248	0.846	0.87	1.067	1.127	0.927	1.07	0.917	0.794	0.49	0.646	1.147	0.766	0.807	9	9	9	1.16341	0.159459	0.218354	0.797351	1.22012	0.0396895	0.287025	1.40132
1519	A0A286ZMR4	MRPL11	Large ribosomal subunit protein uL11m OS=Sus scrofa OX=9823 GN=MRPL11 PE=1 SV=2	0.97	1.172	1.121	1.001	1.011	0.596	1.075	1.176	1.253	0.912	0.854	1.103	0.916	0.523	0.731	0.747	0.977	0.9	1.255	0.9	1.11	0.675	1.176	1.065	1.022	0.937	1.145	9	9	9	1.00969	0.909342	0.0139168	0.041273	0.82531	0.0398342	-0.276993	1.39974
351	A0A8D1KUF6	CNOT1	CCR4-NOT transcription complex subunit 1 OS=Sus scrofa OX=9823 GN=CNOT1 PE=1 SV=1	0.951	1.001	1.013	1.075	1.048	1.014	0.994	0.974	1.046	0.973	0.897	0.92	0.971	0.951	0.966	0.984	1.001	0.983	0.917	1.024	0.946	0.983	1.141	1.123	0.998	1.011	1.16	9	9	9	0.979899	0.528069	-0.0292951	0.277309	0.929378	0.0406412	-0.105663	1.39103
315	A0A287B8Z2	ALDOC	Fructose-bisphosphate aldolase OS=Sus scrofa OX=9823 GN=ALDOC PE=3 SV=1	0.992	0.952	0.939	0.996	1.003	1.057	0.929	0.89	0.942	1.047	0.99	0.994	1.037	1.102	0.978	1.042	0.982	1.001	0.96	1.101	0.939	0.71	0.762	0.977	0.92	0.893	1.012	9	9	9	1.05149	0.300283	0.0724304	0.522469	1.10865	0.0407759	0.148809	1.3896
6	A0A4X1TM78	PCP4	Purkinje cell protein 4 OS=Sus scrofa OX=9823 GN=PCP4 PE=3 SV=1	0.679	1.143	1.412	1.139	1.215	1.56	1.072	0.951	0.918	1.01	1.231	0.932	1.202	1.697	1.383	0.907	1.245	1.194	0.917	1.526	0.962	0.784	0.626	0.756	1.012	0.932	0.946	9	9	9	1.19241	0.155755	0.253883	0.807557	1.27656	0.0408853	0.352265	1.38843
1315	A0A5G2RFZ4	MOB2	MOB kinase activator 2 OS=Sus scrofa OX=9823 GN=MOB2 PE=4 SV=1	1.127	1.112	1.135	0.8	0.845	0.949	0.859	0.928	1.114	0.983	1.008	0.95	0.973	1.165	1.023	1.161	0.995	0.853	0.921	1.009	0.976	0.661	0.642	0.692	1	0.947	1	9	9	9	1.1301	0.123588	0.176446	0.908025	1.16093	0.0411195	0.215284	1.38595
28	A0A5G2QSS3	PLOD1	Procollagen-lysine,2-oxoglutarate 5-dioxygenase 1 OS=Sus scrofa OX=9823 GN=PLOD1 PE=1 SV=1	0.889	1.013	1.061	1.261	1.48	1.819	0.978	0.828	0.905	1.024	1.044	0.987	0.956	1.973	1.674	1.051	0.947	0.967	0.93	0.949	0.853	0.805	0.375	0.828	0.95	1.035	1.004	9	9	9	1.3241	0.0474671	0.405016	1.32361	1.37443	0.0413906	0.458838	1.3831
2647	Q95333	XPNPEP2	Xaa-Pro aminopeptidase 2 OS=Sus scrofa OX=9823 GN=XPNPEP2 PE=1 SV=1	1.108	1.052	1.002	0.773	0.976	1.018	0.949	0.96	0.954	0.978	1.097	0.949	0.911	0.886	0.821	0.944	0.897	0.83	0.982	1.005	1.076	0.893	1.073	1.093	0.88	1.057	1.013	9	9	9	0.969136	0.452006	-0.0452293	0.344856	0.916336	0.0417509	-0.126051	1.37933
1866	A0A5G2QAG4	NHSL3	KIAA1522 OS=Sus scrofa OX=9823 GN=NHSL3 PE=4 SV=1	0.927	1.142	1.027	0.785	0.981	0.749	0.911	1.033	1.03	0.864	0.987	0.949	1.001	0.815	0.806	0.88	0.96	0.877	0.947	0.982	1.171	1.019	0.922	1.168	0.945	0.823	1.268	9	9	9	0.92861	0.267631	-0.106855	0.572464	0.880368	0.0417522	-0.183822	1.37932
85	Q08092	CNN1	Calponin-1 OS=Sus scrofa OX=9823 GN=CNN1 PE=2 SV=1	0.776	1.009	1.181	0.845	1.005	1.081	0.977	0.953	0.874	1.082	1.09	0.942	1.02	1.335	1.084	0.939	1.096	1.106	1.204	1.096	0.934	0.924	0.667	0.675	1.066	0.858	0.8	9	9	9	1.058	0.487375	0.081341	0.312136	1.17875	0.042728	0.237252	1.36929
2242	A0A5S6G1W3	MTX1	Metaxin-1 OS=Sus scrofa OX=9823 GN=MTX1 PE=1 SV=1	1.134	1.105	1.063	1.161	1.24	1.207	1.094	0.915	0.907	0.951	1.029	0.976	1.035	1.132	1.099	0.697	1.179	0.877	1.135	1.022	1.065	1.047	1.17	1.105	1.071	1.193	1.433	9	9	9	0.959477	0.428531	-0.0596805	0.368018	0.876379	0.0434249	-0.190373	1.36226
2546	I3LDM1	POSTN	Periostin OS=Sus scrofa OX=9823 GN=POSTN PE=1 SV=1	0.94	0.929	0.982	1.033	1.009	0.698	0.977	0.717	0.754	1.022	1.099	1.092	1.075	0.945	1.083	0.981	0.918	0.989	1.061	1.099	1.034	0.8	0.773	0.965	0.796	0.885	0.82	9	9	9	0.976436	0.729038	-0.0344022	0.13725	1.11794	0.0439648	0.160843	1.3569
330	A0A8W4FPV1	GBF1	Golgi brefeldin A resistant guanine nucleotide exchange factor 1 OS=Sus scrofa OX=9823 GN=GBF1 PE=1 SV=1	0.969	0.93	0.857	1.019	0.959	1.041	0.928	0.996	0.996	0.923	0.809	0.838	0.947	0.938	1.002	0.94	0.915	0.758	1.033	1.001	1.038	0.801	0.966	1.18	0.971	0.929	0.987	9	9	9	0.976308	0.551527	-0.0345916	0.258434	0.906131	0.0445411	-0.142209	1.35124
835	A0A5G2QW31	MYO6	Unconventional myosin-VI OS=Sus scrofa OX=9823 GN=MYO6 PE=1 SV=1	1.059	0.881	0.946	0.822	0.907	0.834	1.034	1.151	1.182	0.877	0.92	0.818	0.951	0.848	0.872	1.074	0.862	0.903	1.093	1.018	1.039	0.713	0.934	1.118	1.094	1.023	1.358	9	9	9	0.938871	0.389773	-0.0910009	0.409189	0.865282	0.0446317	-0.208757	1.35036
32	A0A287AHQ0	ACAT2	acetyl-CoA C-acetyltransferase OS=Sus scrofa OX=9823 GN=ACAT2 PE=1 SV=1	0.962	0.98	1.147	0.992	1.176	1.058	1	1.088	1.073	1.08	0.955	0.97	1.142	0.981	1.006	1.008	0.979	0.997	0.97	0.9	0.964	0.977	1.026	0.899	1.011	0.928	0.953	9	9	9	1.09828	0.00669862	0.135252	2.17401	1.05679	0.0452526	0.0796912	1.34436
123	F2Z5J1	PSMC1	26S protease regulatory subunit 4 OS=Sus scrofa OX=9823 GN=PSMC1 PE=1 SV=1	1.125	1.137	1.148	0.996	0.933	0.955	1.133	1.071	1.129	1.025	0.897	0.933	1.071	1.109	1.032	0.999	1.023	1.05	0.927	0.965	0.97	0.922	0.917	0.876	1.044	1.029	0.931	9	9	9	1.1219	0.00416945	0.165941	2.37992	1.06503	0.0453161	0.0908905	1.34375
306	F1S2G3	TBCA	Tubulin-specific chaperone A OS=Sus scrofa OX=9823 GN=TBCA PE=1 SV=2	1.177	0.994	1.168	0.884	1.022	0.892	1.216	0.855	0.937	1.098	1.022	1.034	1.052	1.068	0.97	0.917	1.131	1.125	0.928	0.93	1.043	0.952	0.923	0.795	1.005	1.148	0.889	9	9	9	1.06177	0.317055	0.0864673	0.498865	1.09335	0.0453166	0.128752	1.34374
146	F1SQR8	LTA4H	Leukotriene A(4) hydrolase OS=Sus scrofa OX=9823 GN=LTA4H PE=1 SV=4	1.001	0.951	1.047	0.869	1.044	1.039	1.037	0.987	1.014	0.926	0.973	0.849	1.025	1.113	0.975	1.021	0.964	1.019	0.921	0.98	0.963	0.827	0.894	0.735	1.009	0.959	0.812	9	9	9	1.10975	0.0162708	0.150239	1.78859	1.09444	0.0453887	0.130199	1.34305
1075	A0A4X1VP56	IGSF8	Immunoglobulin superfamily member 8 OS=Sus scrofa OX=9823 GN=IGSF8 PE=1 SV=1	0.989	1.213	1.044	1.03	1.003	0.755	1.064	1.045	1.011	1.009	0.92	0.966	1.062	0.805	0.833	0.992	1.063	0.938	1.101	1.062	1.022	0.909	1.145	1.143	0.912	1	1.154	9	9	9	0.968882	0.529259	-0.0456067	0.276332	0.908975	0.045613	-0.137687	1.34091
1554	F1RUE4	GPLD1	Phosphatidylinositol-glycan-specific phospholipase D OS=Sus scrofa OX=9823 GN=GPLD1 PE=1 SV=4	1.076	1.109	1.083	1.056	1.126	1.13	1.015	1.042	1.097	1.098	1.128	0.979	1.006	1.093	1.186	0.961	1.094	1.059	1.047	1.022	0.973	1.023	1.034	1.037	0.992	1.009	0.875	9	9	9	1.08012	0.00230236	0.111185	2.63783	1.06569	0.0457119	0.0917881	1.33997
65	A0A5G2R2F8	ABCC3	ABC-type glutathione-S-conjugate transporter OS=Sus scrofa OX=9823 GN=ABCC3 PE=1 SV=1	1.052	0.992	0.964	0.929	0.981	1.048	1.009	1.048	1.072	1.001	0.988	1.061	1.013	0.912	1.031	1.002	0.989	0.839	1.003	1.093	1.12	0.984	0.98	1.316	1.046	0.982	1.199	9	9	9	0.935411	0.12423	-0.0963279	0.905772	0.908773	0.0460531	-0.138008	1.33674
582	A0A8W4FMI4	ACTN1	Alpha-actinin-1 OS=Sus scrofa OX=9823 GN=ACTN1 PE=1 SV=1	0.969	0.945	0.96	0.996	0.87	0.967	0.98	0.962	0.961	1.008	0.984	0.984	0.928	1.058	0.936	1.054	1.061	1.054	0.99	0.987	0.926	0.878	0.774	0.931	0.994	0.975	1.01	9	9	9	1.01713	0.572966	0.0245032	0.241871	1.07112	0.0462852	0.0991152	1.33456
111	A0A5G2R8E1	PPP1R12A	Protein phosphatase 1 regulatory subunit OS=Sus scrofa OX=9823 GN=PPP1R12A PE=1 SV=2	0.934	0.909	0.958	1.017	1.002	0.933	0.992	0.99	0.961	0.924	1.034	1.053	1.08	1.006	1.051	0.968	1.057	0.963	0.984	1.095	0.914	0.877	0.851	0.974	0.981	0.928	0.954	9	9	9	1.01613	0.576129	0.0230783	0.23948	1.06754	0.0466621	0.094289	1.33104
539	Q9TUB5	CLCA1	Calcium-activated chloride channel regulator 1 OS=Sus scrofa OX=9823 GN=CLCA1 PE=2 SV=1	0.577	1.035	1.214	0.777	1.249	1.044	1.067	0.744	1.102	1.125	0.876	0.847	0.95	1.647	0.996	1.386	0.837	0.957	0.968	0.712	0.899	0.875	0.633	0.995	1.037	0.556	0.837	9	9	9	1.17266	0.147521	0.229781	0.831146	1.28075	0.0481812	0.35699	1.31712
662	F1SNU4	LOC100736951	15 kDa protein B-like OS=Sus scrofa OX=9823 GN=LOC100736951 PE=1 SV=1	0.968	0.96	0.887	1.413	0.791	0.856	0.996	1.017	0.986	1.037	0.959	1.05	0.813	0.895	1.284	1.264	1.241	1.046	0.755	0.753	0.855	1.024	0.827	0.708	1.29	0.96	0.842	9	9	9	1.10731	0.272764	0.147062	0.564213	1.19653	0.048725	0.258858	1.31225
2206	A0A5G2R2V2	MRPL40	Large ribosomal subunit protein mL40 OS=Sus scrofa OX=9823 GN=MRPL40 PE=1 SV=1	1.074	1.116	1.154	1.124	1.081	1.063	1.012	1.065	1.055	0.993	0.774	0.882	1.044	1.003	1.129	1.023	1.016	0.808	1.14	1.183	1.255	1.045	1.131	1.268	0.991	0.831	1.001	9	9	9	0.989741	0.823733	-0.0148771	0.0842137	0.880853	0.0489167	-0.183026	1.31054
1001	F2Z5N5	RPL26L1	60S ribosomal protein L26-like 1 isoform X1 OS=Sus scrofa OX=9823 GN=RPL26L1 PE=1 SV=1	0.842	1.183	1.306	1.258	1.115	0.8	0.978	1.24	1.2	0.832	0.818	1.051	1.185	0.592	0.844	0.638	0.848	1.008	1.268	0.855	1.187	0.826	1.129	1.415	0.98	0.778	1.281	9	9	9	1.02089	0.821284	0.0298231	0.0855065	0.804198	0.0490484	-0.314377	1.30938
2984	F1SJB5	ANXA1	Annexin OS=Sus scrofa OX=9823 GN=ANXA1 PE=1 SV=3	0.92	0.991	0.819	1.052	0.899	0.861	0.89	0.818	0.991	0.963	0.948	1.077	0.905	0.98	1.069	1.289	1.084	0.948	0.949	0.906	0.944	0.901	0.834	0.962	1.063	0.982	0.833	9	9	9	0.984118	0.689249	-0.0230975	0.161624	1.10616	0.0503239	0.145563	1.29823
1278	A0A287AFH8	LMO7	LIM domain 7 OS=Sus scrofa OX=9823 GN=LMO7 PE=1 SV=3	1.052	0.959	0.905	0.975	0.933	1.043	1.033	1.006	1.092	0.885	0.994	0.97	0.955	1.098	0.974	1.058	0.901	0.971	1.047	1.041	1.114	1.005	1	0.984	0.966	1.101	1.1	9	9	9	0.96153	0.164592	-0.0565959	0.783592	0.941013	0.0511654	-0.0877134	1.29102
2384	A0A8W4FKF3	TBCC	Tubulin folding cofactor C OS=Sus scrofa OX=9823 GN=TBCC PE=1 SV=1	0.641	1.805	1.566	1.011	1.085	0.983	1.073	1.124	1.153	0.683	0.928	1.081	1.104	0.863	1	0.91	0.875	0.921	1.173	0.884	1.063	1.125	1.21	1.1	0.993	0.923	0.966	9	9	9	1.10639	0.371501	0.14586	0.43004	0.886405	0.0513779	-0.173963	1.28922
251	A0A8X9AEX3	KIAA1217	KIAA1217 OS=Sus scrofa OX=9823 GN=KIAA1217 PE=1 SV=1	1.032	1.046	0.921	1.139	1.074	0.997	0.976	0.977	1.007	1.04	1.064	0.952	1.038	1.069	1.008	1.032	0.911	0.905	1.159	1.055	1.097	1.091	1.325	1.172	0.912	0.932	1.257	9	9	9	0.9169	0.0916434	-0.125164	1.0379	0.9019	0.0515963	-0.148961	1.28738
198	P83686	CYB5R3	NADH-cytochrome b5 reductase 3 (Fragment) OS=Sus scrofa OX=9823 GN=CYB5R3 PE=1 SV=1	1.051	1.036	1.043	0.972	0.982	1.177	1.027	1.079	1.149	1.047	0.94	1.009	0.987	1.055	1.023	1.067	0.989	1.085	0.989	0.979	0.952	0.995	0.862	0.783	1.097	1.003	0.817	9	9	9	1.12257	0.0131341	0.166801	1.8816	1.08553	0.0516194	0.118394	1.28719
2330	A5D9J4	PSMB8	Proteasome subunit beta OS=Sus scrofa OX=9823 GN=PSMB8 PE=1 SV=1	1.078	0.919	0.936	1.008	1.169	0.989	1.057	0.984	0.961	1.043	0.857	0.882	0.982	0.925	0.953	0.945	1.007	0.857	1.05	0.938	1.113	0.924	1.072	1.049	0.988	0.942	0.969	9	9	9	1.00619	0.859511	0.00890457	0.0657486	0.934328	0.0519781	-0.0979984	1.28418
1631	A0A287AZW8	MAP4K1	Mitogen-activated protein kinase kinase kinase kinase 1 OS=Sus scrofa OX=9823 GN=MAP4K1 PE=3 SV=2	0.982	1.077	0.903	0.894	0.888	0.818	1.099	1.247	1.015	1.039	0.803	0.814	0.875	0.806	0.867	0.895	1.007	0.819	1.014	1.07	0.958	0.885	0.806	0.899	1.074	0.977	1.269	9	9	9	0.996761	0.960065	-0.0046812	0.0176993	0.885277	0.0521346	-0.175799	1.28287
2416	K7GPB8	NT5DC1	5'-nucleotidase domain containing 1 OS=Sus scrofa OX=9823 GN=NT5DC1 PE=1 SV=1	1.067	0.97	0.954	0.876	1.044	0.915	0.994	0.792	0.779	0.933	0.935	1.517	1.243	1.196	1.185	0.991	1.101	1.439	1.041	0.922	1.003	1.164	1.094	1.074	0.915	1.028	0.759	9	9	9	0.932333	0.215789	-0.101082	0.665971	1.17111	0.0526745	0.227878	1.2784
2373	F1SV16	DDX10	ATP-dependent RNA helicase OS=Sus scrofa OX=9823 GN=DDX10 PE=3 SV=3	0.891	1.141	1.054	1.137	0.965	0.75	0.922	1.077	0.895	0.985	0.994	0.855	0.966	0.781	0.731	0.709	0.916	0.749	1.135	0.864	0.918	0.978	1.064	1.224	0.78	0.832	1.084	9	9	9	0.994707	0.938294	-0.00765703	0.0276609	0.865638	0.0527279	-0.208164	1.27796
348	A0A8D1WK50	NUDT21	Cleavage and polyadenylation specificity factor subunit 5 OS=Sus scrofa OX=9823 GN=NUDT21 PE=1 SV=1	1.117	1.065	1.029	0.832	1.07	0.798	0.928	0.944	0.906	0.982	1.006	0.996	0.824	0.702	0.743	0.907	0.997	0.872	1.115	1.069	1.091	0.878	1.01	1.103	0.869	0.835	1.434	9	9	9	0.923969	0.284725	-0.114084	0.545575	0.853786	0.0527736	-0.228054	1.27758
478	F1RL48	ACAD10	Acyl-CoA dehydrogenase family member 10 OS=Sus scrofa OX=9823 GN=ACAD10 PE=1 SV=4	1.077	1.305	1.445	1.186	1.169	0.815	1.11	1.155	1.061	0.933	1.156	0.995	1.138	0.785	0.969	0.857	0.972	0.914	1.16	0.963	1.204	1.018	1.151	1.381	0.96	0.889	1.281	9	9	9	1.03158	0.665268	0.0448528	0.177003	0.87129	0.0527821	-0.198775	1.27751
153	A0A5G2R890	AP2A2	Adaptor related protein complex 2 subunit alpha 2 OS=Sus scrofa OX=9823 GN=AP2A2 PE=1 SV=2	1.272	1.108	1.2	1.252	1.177	1.196	1.218	1.16	1.144	1.093	1.089	1.214	1.138	1.291	1.154	1.015	1.065	1.114	0.983	0.959	1.114	1.227	1.158	0.854	0.999	1.004	0.987	9	9	9	1.1553	0.00267484	0.208273	2.5727	1.09564	0.0531626	0.131771	1.27439
1093	A0A287ADH9	CLIC4	Chloride intracellular channel protein OS=Sus scrofa OX=9823 GN=CLIC4 PE=1 SV=1	1.049	1.028	1.417	1.007	0.992	0.96	0.936	0.908	0.89	1.065	1.151	1.065	0.949	1.244	1.003	0.899	0.969	1.041	0.915	1.088	1.035	0.846	0.948	0.877	1.018	0.947	0.865	9	9	9	1.07589	0.249434	0.105527	0.603044	1.09919	0.0532811	0.136443	1.27343
2161	I3LBT8	SNRPN	Small nuclear ribonucleoprotein-associated protein OS=Sus scrofa OX=9823 GN=SNRPN PE=3 SV=3	1.009	1.192	1.209	1.114	1.092	0.731	0.961	0.994	1.256	0.847	0.915	0.998	1.139	0.677	0.897	0.874	0.836	0.789	0.93	0.977	1.035	0.856	1.353	1.166	0.906	0.882	1.382	9	9	9	1.00748	0.927854	0.0107568	0.0325201	0.840308	0.0533907	-0.25101	1.27253
333	A0A287AL10	FTH1	Ferritin OS=Sus scrofa OX=9823 GN=FTH1 PE=1 SV=2	0.913	1.011	0.918	1.041	0.932	0.695	0.99	0.958	0.835	0.774	0.857	0.766	0.907	0.785	1.027	0.955	0.769	0.858	0.906	0.8	0.937	1.096	0.879	0.976	1.227	0.834	1.229	9	9	9	0.933476	0.322342	-0.0993153	0.491683	0.866502	0.0534533	-0.206726	1.27203
1734	A0A287AJ85	SNRNP70	U1 small nuclear ribonucleoprotein 70 kDa OS=Sus scrofa OX=9823 GN=SNRNP70 PE=1 SV=3	1.111	1.032	1.098	1.008	1.193	0.849	1.079	1.11	1.022	1.049	1.011	0.998	0.94	0.702	0.855	0.841	0.932	1.05	1.06	1.007	1.123	0.879	1.155	1.162	0.882	0.952	1.244	9	9	9	1.00402	0.938652	0.00578113	0.0274953	0.885249	0.0536014	-0.175844	1.27082
1288	F1RX84	PLPBP	Pyridoxal phosphate homeostasis protein OS=Sus scrofa OX=9823 GN=PLPBP PE=1 SV=1	0.961	1.285	1.138	0.953	1.094	0.728	1.042	0.935	0.966	0.963	0.995	0.931	1.053	0.741	0.796	0.989	1.087	0.888	1.087	1.067	1.049	0.812	1.26	1.185	0.984	0.976	1.096	9	9	9	0.956494	0.503622	-0.0641717	0.297895	0.887243	0.0537427	-0.1726	1.26968
26	P27594	MX1	Interferon-induced GTP-binding protein Mx1 OS=Sus scrofa OX=9823 GN=MX1 PE=2 SV=1	0.904	1.01	0.972	1.187	1.7	1.189	1.035	2.02	1.215	0.846	0.989	1.1	0.841	1.001	1.081	1.046	0.958	0.985	0.754	0.795	1.202	0.713	0.891	0.778	0.962	0.892	0.701	9	9	9	1.46098	0.0140401	0.546935	1.85263	1.15075	0.0538942	0.20258	1.26846
1575	A0A287AKC0	RPS5	Small ribosomal subunit protein uS7 OS=Sus scrofa OX=9823 GN=RPS5 PE=1 SV=1	1.041	1.124	1.017	0.977	1.099	0.711	1.023	1.029	0.958	0.936	0.928	0.996	1.003	0.749	0.875	0.81	1.036	0.998	1.092	1.1	1.08	0.933	1.166	1.123	0.83	0.856	1.176	9	9	9	0.959705	0.489913	-0.0593371	0.309881	0.890445	0.0545806	-0.167402	1.26296
260	F1S3I5	DNMT1	DNA (cytosine-5)-methyltransferase OS=Sus scrofa OX=9823 GN=DNMT1 PE=3 SV=5	0.946	0.989	1.003	1.097	0.937	0.964	1.086	0.982	0.949	1.02	0.857	0.968	0.999	0.816	0.981	0.82	0.988	0.873	0.96	1.057	0.929	0.993	1.276	1.239	0.842	1.036	1.016	9	9	9	0.957745	0.404358	-0.0622865	0.393234	0.890244	0.0548478	-0.167727	1.26084
1107	A0A287AJU1	COTL1	Coactosin like F-actin binding protein 1 OS=Sus scrofa OX=9823 GN=COTL1 PE=1 SV=1	1.114	1.121	1.006	0.895	1.094	0.95	1.106	0.937	0.935	1.04	0.939	1.086	1.118	1.01	0.946	1.002	0.994	1.046	0.863	0.87	1.167	0.791	0.916	0.773	1.021	0.971	0.947	9	9	9	1.10085	0.0860531	0.138622	1.06523	1.10362	0.0560139	0.142241	1.2517
480	I3LIX0	GOLGA2	Golgin subfamily A conserved domain-containing protein OS=Sus scrofa OX=9823 GN=GOLGA2 PE=1 SV=2	0.918	1.04	1.139	0.932	0.877	1.036	1.023	1.06	1.01	0.954	1.033	1.006	1.052	1.102	1.03	1.063	0.995	1.006	0.994	1.009	1.025	0.758	0.656	0.934	1.031	1.022	0.901	9	9	9	1.08463	0.156972	0.117208	0.804178	1.10936	0.0571591	0.149732	1.24291
278	F1RXC7	CASC3	Protein CASC3 OS=Sus scrofa OX=9823 GN=CASC3 PE=3 SV=4	1.017	1.372	1.324	1.172	0.822	0.983	1.024	1.323	1.278	0.988	1.106	1.052	1.065	0.778	0.703	0.741	0.914	0.99	1.309	0.914	1.267	1.032	1.179	1.29	0.983	0.733	1.149	9	9	9	1.04657	0.583794	0.0656697	0.233741	0.845881	0.0575706	-0.241474	1.2398
51	F1RSN0	SHARPIN	SHANK associated RH domain interactor OS=Sus scrofa OX=9823 GN=SHARPIN PE=4 SV=4	0.972	0.919	0.858	0.914	0.845	0.886	0.93	0.824	0.889	1.048	0.756	0.923	1.045	0.953	0.969	0.824	0.824	0.847	1.022	0.96	0.924	0.877	1.102	1.061	0.924	1.05	1.072	9	9	9	0.893794	0.00427831	-0.161985	2.36873	0.910698	0.0577731	-0.134955	1.23827
750	A0A8W4FG18	DDT	D-dopachrome decarboxylase OS=Sus scrofa OX=9823 GN=DDT PE=1 SV=1	1.035	1.025	1.015	0.734	0.847	0.879	1.211	0.86	0.798	0.903	0.912	1.009	1.054	0.918	0.882	0.913	1.079	1.153	0.937	0.915	0.984	0.854	0.754	0.802	0.936	0.904	0.977	9	9	9	1.04229	0.510758	0.0597594	0.291785	1.09426	0.0589121	0.129953	1.2298
1338	F1SPN4	DDX23	RNA helicase OS=Sus scrofa OX=9823 GN=DDX23 PE=1 SV=2	1.046	0.92	1.066	1.081	1.069	1.031	1.101	1.1	1.053	0.983	0.901	0.958	1.006	1.012	0.999	0.931	0.976	0.908	0.947	1.01	0.965	1.028	1.264	1.111	0.944	1.015	1.086	9	9	9	1.01035	0.783877	0.0148583	0.105752	0.92572	0.0591673	-0.111352	1.22792
281	I3LGM5	MRPL45	Large ribosomal subunit protein mL45 OS=Sus scrofa OX=9823 GN=MRPL45 PE=1 SV=2	1.049	1.044	1.226	1.037	1.063	1.095	1.007	0.865	0.88	0.933	0.889	1.08	0.724	0.806	0.858	0.901	0.982	0.821	0.813	1.077	1.111	0.868	1.134	1.383	0.841	0.97	1.089	9	9	9	0.997846	0.975225	-0.0031106	0.0108951	0.860866	0.0595429	-0.21614	1.22517
2499	A0A8D1S998	RPL4	Large ribosomal subunit protein uL4 OS=Sus scrofa OX=9823 GN=RPL4 PE=1 SV=1	1.07	1.141	1.182	1.084	1.092	0.96	1.069	1.125	1.08	1.071	0.92	1.061	0.966	0.81	0.912	1.142	1.022	0.952	1.052	1.019	1.114	1.011	1.17	1.028	1.099	1.011	1.064	9	9	9	1.02456	0.355603	0.0350059	0.449034	0.925585	0.0596655	-0.111562	1.22428
393	A0A286ZZ97	CAVIN1	Caveolae associated protein 1 OS=Sus scrofa OX=9823 GN=CAVIN1 PE=3 SV=1	0.84	0.896	0.865	0.803	0.908	0.921	0.948	0.926	0.878	1.001	0.968	0.894	1.061	1.052	0.964	1.029	0.988	1.002	0.965	1.077	0.902	0.756	0.607	0.815	1.09	0.925	0.759	9	9	9	1.01127	0.861253	0.0161704	0.0648691	1.13463	0.0604033	0.182216	1.21894
102	A0A2C9F366	HSPB1	Heat shock protein beta-1 OS=Sus scrofa OX=9823 GN=HSPB1 PE=3 SV=1	0.918	1.066	1.069	0.946	0.922	1.088	1.037	1.111	1.117	0.936	0.981	0.877	0.941	1.173	1.159	0.997	1.034	1.057	0.895	1.024	1.001	0.861	0.78	1.039	1	0.846	0.884	9	9	9	1.11333	0.0207002	0.154875	1.68403	1.09904	0.0604808	0.136243	1.21838
182	A0A287B310	STOM	Stomatin OS=Sus scrofa OX=9823 GN=STOM PE=1 SV=2	1.101	0.936	0.913	1.119	0.949	0.816	0.988	1.026	1.124	1.006	0.972	1.023	0.942	0.879	1.089	1.092	0.997	1.003	0.926	0.985	0.874	0.996	0.954	0.918	0.931	1.034	0.793	9	9	9	1.0667	0.163248	0.0931523	0.787152	1.07038	0.060619	0.0981285	1.21739
2491	F1RHN3	COMT	Catechol O-methyltransferase OS=Sus scrofa OX=9823 GN=COMT PE=1 SV=3	1.07	0.878	0.983	0.899	0.864	1.079	0.836	1.152	1.081	1.066	0.834	0.87	0.782	0.877	0.929	1.053	0.954	0.857	0.973	1.051	1.019	0.758	1.083	1.191	0.922	1.044	1.186	9	9	9	0.958275	0.479667	-0.0614889	0.31906	0.891081	0.060641	-0.166372	1.21723
1467	A0A287AKU6	PDCD6	Programmed cell death 6 OS=Sus scrofa OX=9823 GN=PDCD6 PE=1 SV=2	0.804	1.452	1.454	1.011	0.968	1.094	0.894	0.907	0.91	1.098	1.023	1.113	0.966	0.974	0.999	1.111	0.87	0.906	0.823	0.984	0.981	0.906	0.976	0.894	0.981	0.998	0.844	9	9	9	1.13199	0.171371	0.178861	0.766062	1.08024	0.0609058	0.111356	1.21534
19	A0A287BQ55	SLMAP	Sarcolemma associated protein OS=Sus scrofa OX=9823 GN=SLMAP PE=4 SV=2	0.747	0.919	1.161	0.893	0.938	1.084	0.985	1.086	1.021	0.963	1.001	0.938	1.019	1.211	1.155	1.01	0.989	1.011	0.986	1.195	0.91	0.794	0.632	0.788	1.071	0.865	0.889	9	9	9	1.08659	0.276047	0.119811	0.559016	1.14354	0.0611781	0.19351	1.2134
2883	I3LG77	SAMHD1	Deoxynucleoside triphosphate triphosphohydrolase SAMHD1 OS=Sus scrofa OX=9823 GN=SAMHD1 PE=1 SV=2	1.054	1.006	1.003	1.021	1.061	0.851	1.022	1.046	1.008	0.995	0.995	1.081	1.069	0.963	1.061	1.06	0.963	1.007	0.977	0.951	0.989	0.816	0.956	0.987	0.974	0.989	1.066	9	9	9	1.04216	0.196541	0.0595763	0.706546	1.05617	0.0617157	0.0788484	1.2096
2460	A0A286ZLR7	GAPVD1	GTPase activating protein and VPS9 domains 1 OS=Sus scrofa OX=9823 GN=GAPVD1 PE=1 SV=1	1.166	1.113	1.282	1.158	1.042	0.961	1.036	1.084	1.085	1.057	1.035	0.977	0.975	0.902	1.042	0.935	0.996	0.99	1.094	1.077	1.08	0.942	1.188	1.181	0.908	0.982	1.215	9	9	9	1.0269	0.556589	0.0382896	0.254465	0.921589	0.0618258	-0.117805	1.20883
409	A0A287AW32	HNRNPA2B1	Heterogeneous nuclear ribonucleoproteins A2/B1 OS=Sus scrofa OX=9823 GN=HNRNPA2B1 PE=1 SV=1	1.051	1.024	0.981	0.998	0.952	0.905	0.999	1.013	0.994	1.042	0.942	0.976	0.973	0.899	0.976	0.934	0.981	0.91	1.023	0.989	1.057	0.985	1.022	1.136	0.862	1.007	1.179	9	9	9	0.962959	0.279521	-0.0544538	0.553585	0.932289	0.0621394	-0.10115	1.20663
30	A0A4X1VY40	TPM2	Tropomyosin beta chain OS=Sus scrofa OX=9823 GN=TPM2 PE=1 SV=1	0.626	0.968	1.068	0.873	1.229	0.929	0.953	0.881	0.836	0.709	1.027	0.873	1.112	1.225	0.965	0.875	1.064	0.98	0.833	1.011	0.848	0.794	0.612	0.739	0.992	0.671	1.041	9	9	9	1.109	0.239955	0.149265	0.619871	1.17093	0.0625486	0.227658	1.20378
665	I3L5Z1	CDH1	Cadherin-1 OS=Sus scrofa OX=9823 GN=CDH1 PE=1 SV=4	1.055	0.822	0.924	0.881	0.926	0.763	1.013	1.203	1.232	0.946	0.923	0.836	0.927	0.782	0.737	0.965	0.883	0.896	0.976	0.913	1.111	0.853	0.902	1.065	0.96	0.866	0.946	9	9	9	1.02642	0.6863	0.0376211	0.163486	0.918878	0.0627148	-0.122055	1.20263
1335	A0A8W4FC88	ITGA6	Integrin subunit alpha 6 OS=Sus scrofa OX=9823 GN=ITGA6 PE=1 SV=1	0.946	1.004	0.974	1.007	1.003	1.141	1.036	1.045	1.145	0.927	0.99	0.921	0.934	0.956	0.933	1.045	1.057	1.061	1.018	1.053	0.976	0.998	1.075	0.957	1.082	1.1	1.028	9	9	9	1.00151	0.956803	0.0021732	0.0191773	0.950145	0.0631047	-0.0737798	1.19994
2363	A0A287ANI9	RPL29	Large ribosomal subunit protein eL29 OS=Sus scrofa OX=9823 GN=RPL29 PE=1 SV=2	1.104	1.02	0.82	0.959	1.135	0.961	1.167	0.76	0.793	1.032	1.181	1.005	1.142	0.972	0.957	1.091	1.143	1.114	0.937	0.96	1.051	1.165	0.966	0.873	1.062	0.992	0.902	9	9	9	0.978783	0.727187	-0.0309389	0.138354	1.08184	0.0633532	0.113483	1.19823
2189	F1RWC5	KIF5B	Kinesin-like protein OS=Sus scrofa OX=9823 GN=KIF5B PE=1 SV=2	1.013	1.026	1.177	1.035	1.085	0.998	0.988	0.989	0.998	0.995	1.007	1.006	0.964	0.939	0.979	0.981	0.978	0.966	1.103	1.08	1.05	1.002	1.108	0.978	0.925	0.942	1.092	9	9	9	1.00313	0.919398	0.00450139	0.0364965	0.949892	0.0650659	-0.0741642	1.18665
538	K9J4L8	PRKCB	Protein kinase C OS=Sus scrofa OX=9823 GN=PRKCB PE=1 SV=1	1.095	1.129	1.152	1.054	0.989	1.035	1.05	1.07	1.186	1.084	0.909	0.976	0.927	0.895	0.939	1.026	1.03	0.941	0.925	1.081	1.063	0.967	0.935	1.255	1.031	1.065	1.304	9	9	9	1.01392	0.765773	0.0199447	0.1159	0.906607	0.0653852	-0.141451	1.18452
1671	F1S2T2	YLPM1	YLP motif containing 1 OS=Sus scrofa OX=9823 GN=YLPM1 PE=1 SV=3	1.039	1.139	1.101	1.119	1.045	0.851	1.001	1.081	1.081	1.03	1.05	1.013	1.035	0.834	0.892	0.905	1.021	0.908	1.171	0.995	1.043	0.946	1.098	1.198	0.948	0.936	1.114	9	9	9	1.00085	0.984148	0.00122094	0.00693942	0.919462	0.0660934	-0.121138	1.17984
1105	A0A286ZYB5	DUT	Deoxyuridine 5'-triphosphate nucleotidohydrolase OS=Sus scrofa OX=9823 GN=DUT PE=1 SV=2	0.849	1.423	1.465	1.138	1.061	0.71	1.147	1.14	1.145	0.878	0.824	0.989	0.985	0.554	0.781	0.789	1.094	0.987	1.121	0.948	0.829	0.779	1.312	1.311	0.888	0.988	1.283	9	9	9	1.06544	0.527733	0.0914498	0.277585	0.833175	0.0668151	-0.263309	1.17513
295	A0A4X1VDN4	CLIC1	Chloride intracellular channel protein OS=Sus scrofa OX=9823 GN=CLIC1 PE=3 SV=1	0.975	0.972	1.041	1.06	0.974	1.113	1.119	0.98	1.01	0.971	0.885	0.928	0.976	1.114	1.06	1.088	1.009	0.972	0.902	0.926	1.021	1.031	0.888	0.799	0.973	0.981	0.83	9	9	9	1.10693	0.0098903	0.146568	2.00479	1.07807	0.0668591	0.108457	1.17484
2066	A0A5G2QFH3	KHK	Ketohexokinase OS=Sus scrofa OX=9823 GN=KHK PE=1 SV=1	0.962	1.044	1.142	1.016	1.375	0.974	0.962	0.885	0.944	0.865	0.911	0.855	1.041	0.97	0.937	0.752	0.96	0.954	0.893	0.865	1.014	0.957	1.117	1.053	1.057	0.974	0.997	9	9	9	1.04223	0.466871	0.0596757	0.330803	0.923603	0.0671489	-0.114656	1.17296
805	A0A5G2QNC0	LOC100512544	B30.2/SPRY domain-containing protein OS=Sus scrofa OX=9823 GN=LOC100512544 PE=4 SV=1	0.918	0.773	0.886	0.825	0.796	1.04	0.862	0.901	0.983	0.971	0.956	0.907	0.803	1.248	0.83	1.019	0.844	0.983	1.088	1.134	1.007	0.963	0.95	0.901	1.322	1.084	1.276	9	9	9	0.820977	0.00436029	-0.284587	2.36048	0.880308	0.0672179	-0.183919	1.17252
940	F1SAR6	SYNE3	Spectrin repeat containing nuclear envelope family member 3 OS=Sus scrofa OX=9823 GN=SYNE3 PE=1 SV=4	1.087	0.924	0.974	1.121	0.895	1.199	1.028	1.115	1.43	0.99	0.903	0.936	0.822	0.964	0.946	1.093	1.121	0.92	1.036	1.238	0.992	0.949	1	1.143	0.969	1.068	1.502	9	9	9	0.987471	0.865472	-0.0181898	0.0627469	0.878549	0.0673339	-0.186805	1.17177
8	A0A8W4FLI0	PDLIM7	PDZ and LIM domain protein 7 OS=Sus scrofa OX=9823 GN=PDLIM7 PE=1 SV=1	0.786	1.079	1.238	0.909	1.137	1.067	1.118	1.191	1.003	0.859	1.171	0.994	1.144	1.34	1.085	0.783	1.134	1.19	0.995	1.113	1	0.98	0.849	0.706	1.017	0.737	1	9	9	9	1.13469	0.0740162	0.182299	1.13067	1.15517	0.0679443	0.208111	1.16785
921	A0A4X1SUV4	PNN	Pinin OS=Sus scrofa OX=9823 GN=PNN PE=1 SV=1	1.122	1.075	0.997	0.938	0.965	0.85	1.058	1.02	1.03	1.096	0.995	1.07	1.02	0.798	0.926	0.869	0.932	0.983	1.086	1.009	1.067	0.993	1.176	1.13	0.919	0.923	1.257	9	9	9	0.947176	0.247402	-0.078296	0.606597	0.908891	0.0683612	-0.13782	1.16519
895	A0A287B9M9	EIF4G1	Eukaryotic translation initiation factor 4 gamma 1 OS=Sus scrofa OX=9823 GN=EIF4G1 PE=1 SV=1	0.962	1.034	1.01	0.949	0.975	0.638	1.1	1.092	0.812	1.021	0.852	1.033	1.012	0.576	0.713	0.833	0.995	0.94	1.076	1.072	1.154	0.739	1.407	1.035	0.891	0.849	1.434	9	9	9	0.887646	0.2142	-0.171943	0.669181	0.825826	0.0684359	-0.276091	1.16472
2021	F1SUW3	EFHD2	EF-hand domain family member D2 OS=Sus scrofa OX=9823 GN=EFHD2 PE=1 SV=1	1.07	0.961	0.948	0.972	0.97	0.846	1.047	0.911	0.765	1.082	1.097	1.031	1.06	1.02	1.04	1.094	1.062	0.993	1.067	1.042	1.111	0.931	0.971	0.927	0.995	0.977	1.034	9	9	9	0.937604	0.117538	-0.0929501	0.929821	1.04682	0.0699998	0.0660202	1.1549
56	P29269	MYL9	Myosin regulatory light polypeptide 9 OS=Sus scrofa OX=9823 GN=MYL9 PE=1 SV=2	0.691	0.8	0.997	0.784	0.941	1.146	0.949	1.011	0.937	0.958	0.872	0.833	1.046	1.232	1.112	0.925	1.038	0.977	0.965	1.139	0.824	0.684	0.463	0.765	1.112	0.785	0.815	9	9	9	1.09322	0.367342	0.128584	0.43493	1.19081	0.0710487	0.251944	1.14844
188	F1RNB0	SUPT6H	Transcription elongation factor spt6 OS=Sus scrofa OX=9823 GN=SUPT6H PE=1 SV=5	0.955	1.034	0.995	0.942	0.964	0.763	0.817	0.843	0.668	0.977	0.962	0.917	1.074	0.848	0.937	0.765	0.901	1.028	0.941	1.002	0.986	1.562	1.133	1.368	0.766	0.939	1.562	9	9	9	0.777951	0.0345843	-0.362249	1.46112	0.819671	0.0710943	-0.286884	1.14817
298	A0A8W4FA01	VAMP8	Vesicle-associated membrane protein 8 OS=Sus scrofa OX=9823 GN=VAMP8 PE=1 SV=1	0.979	1.022	1.104	1.114	1.089	0.624	0.959	0.853	0.775	0.938	0.806	1.024	1.204	0.661	0.75	0.869	0.988	0.87	1.244	0.84	1.156	0.842	1.127	1.308	0.923	0.851	1.465	9	9	9	0.873206	0.168752	-0.195606	0.772752	0.831283	0.0711162	-0.266588	1.14803
1881	I3LUJ5	CNN2	Calponin OS=Sus scrofa OX=9823 GN=CNN2 PE=3 SV=4	1.153	1.066	1.034	0.923	0.973	1.023	1.011	0.845	0.919	1.106	0.98	1.098	1.034	1.054	0.961	0.975	1.007	1.021	0.887	0.91	1.082	1.088	0.891	0.76	0.973	1.062	0.765	9	9	9	1.06284	0.27516	0.0879265	0.560415	1.09717	0.0716557	0.133791	1.14475
2959	A0A5K1TZD3	APAF1	Apoptotic protease-activating factor 1 OS=Sus scrofa OX=9823 GN=APAF1 PE=2 SV=1	1.113	1.19	1.256	1.069	0.964	0.897	0.906	0.744	0.822	1.107	0.877	1.028	0.994	0.773	0.834	0.904	0.929	0.969	0.996	1.067	1.062	0.898	1.1	1.045	0.871	1.108	1.035	9	9	9	0.975931	0.70752	-0.0351487	0.150261	0.916467	0.0721288	-0.125845	1.14189
10	F1S5C5	NCAPG	Non-SMC condensin I complex subunit G OS=Sus scrofa OX=9823 GN=NCAPG PE=3 SV=4	1.07	1.088	1.238	0.945	0.948	1.109	0.903	0.794	0.838	1.042	1.049	0.939	0.832	0.889	0.964	0.85	0.967	0.816	1.039	1.072	0.951	1.115	1.171	0.91	0.886	0.881	1.272	9	9	9	0.960848	0.549812	-0.0576205	0.259786	0.897924	0.0725301	-0.155335	1.13948
713	Q95274	TMSB4	Thymosin beta-4 OS=Sus scrofa OX=9823 GN=TMSB4 PE=3 SV=3	0.957	1.18	0.94	0.886	1.139	1.107	1.214	1.142	1.095	0.906	1.375	1.413	0.821	1.092	0.919	0.965	0.952	1.238	0.97	0.622	0.879	0.983	0.612	0.703	1.038	0.94	1.22	9	9	9	1.2125	0.0321857	0.277987	1.49234	1.21514	0.072882	0.28112	1.13738
1873	I3LBA9	LGALS2	Galectin OS=Sus scrofa OX=9823 GN=LGALS2 PE=1 SV=2	1.161	0.899	0.842	0.836	0.895	0.952	1.058	0.922	1.124	0.982	1.031	0.87	1.021	1.065	0.978	1.036	0.991	0.889	1.062	0.949	1.108	0.914	1.013	1.165	1.116	1.012	1.225	9	9	9	0.908511	0.0822289	-0.138424	1.08498	0.926704	0.0738585	-0.109819	1.1316
429	F1SE79	DCUN1D4	DCN1-like protein OS=Sus scrofa OX=9823 GN=DCUN1D4 PE=4 SV=2	1.013	0.939	1.053	1.128	1.001	0.969	1.063	1.251	1.204	1.075	0.729	0.891	0.955	0.747	1.019	1.043	1.078	0.931	0.959	1.019	0.919	1.123	1.149	1.177	1.091	1.128	0.882	9	9	9	1.01842	0.706739	0.0263306	0.150741	0.896369	0.0741848	-0.157835	1.12969
504	F1SJ34	COX5A	Cytochrome c oxidase subunit 5A, mitochondrial OS=Sus scrofa OX=9823 GN=COX5A PE=1 SV=1	0.976	0.901	0.908	0.886	0.909	0.854	1.035	1.014	1.149	1.025	0.744	0.868	0.93	0.877	0.858	0.934	0.984	0.904	0.937	0.959	0.989	0.799	0.974	1.21	0.959	0.994	1.304	9	9	9	0.945973	0.372191	-0.0801297	0.429234	0.890301	0.0752775	-0.167634	1.12333
55	M3VH74	CD2AP	CD2-associated protein OS=Sus scrofa OX=9823 GN=CD2AP PE=1 SV=1	1.029	1.018	1.139	1.139	0.975	0.919	1.1	1.038	0.976	1.079	1.081	0.996	1.07	0.904	0.99	1.012	1.021	0.889	1.091	1.047	1.029	1.04	1.312	1.329	0.964	1.012	1.079	9	9	9	0.942442	0.230401	-0.0855247	0.637515	0.913057	0.0758059	-0.131224	1.1203
444	A0A8D1W8I5	CREB1	cAMP responsive element binding protein 1 OS=Sus scrofa OX=9823 GN=CREB1 PE=1 SV=1	1.067	0.977	0.989	1.071	1.083	1.168	0.931	0.863	0.859	1.139	0.996	1.022	1.085	1.433	1.038	0.943	0.852	0.907	1.029	0.993	0.964	0.921	0.77	0.866	1.007	0.941	0.812	9	9	9	1.08491	0.108982	0.117574	0.962643	1.13393	0.0772035	0.181328	1.11236
2374	A0A287BK74	EIF3L	Eukaryotic translation initiation factor 3 subunit L OS=Sus scrofa OX=9823 GN=EIF3L PE=1 SV=2	0.918	1.001	0.916	1.052	0.944	1.03	0.998	1.022	1.038	0.964	0.89	1.013	1.032	1.039	1.013	1.046	1.004	0.961	1.018	0.921	0.926	0.825	1.03	0.888	0.994	0.997	0.851	9	9	9	1.0555	0.107928	0.0779306	0.966865	1.06059	0.0782919	0.0848694	1.10628
36	A0A5G2QH63	UBE4A	Ubiquitin conjugation factor E4 OS=Sus scrofa OX=9823 GN=UBE4A PE=1 SV=2	1.039	1.074	0.868	1.082	1.31	1.157	1.001	1.04	0.925	1.068	0.967	1.007	1.284	1.198	1.167	1.024	1.063	0.933	1.014	1.048	0.994	0.866	0.92	1.15	0.925	0.964	1.023	9	9	9	1.06649	0.218796	0.0928663	0.65996	1.09063	0.0789142	0.125166	1.10284
1602	F1SC47	ALDH18A1	Delta-1-pyrroline-5-carboxylate synthase OS=Sus scrofa OX=9823 GN=ALDH18A1 PE=1 SV=1	1.076	1.018	1.062	1.031	1.094	1.021	1.063	1.104	1.144	1.035	0.976	0.963	1.073	0.918	0.933	1.02	0.97	0.911	0.977	1.029	1.072	0.978	1.263	1.143	0.988	0.936	1.079	9	9	9	1.01564	0.663247	0.0223842	0.178325	0.929635	0.0790276	-0.105263	1.10222
136	Q2QLE2	CAV2	Caveolin-2 OS=Sus scrofa OX=9823 GN=CAV2 PE=3 SV=1	0.967	1.145	1.1	1.074	0.959	0.694	1.098	1.383	1.094	0.924	1.108	1.071	0.97	0.718	0.844	0.904	0.993	1.148	1.276	0.977	1.101	0.977	1.06	1.086	0.962	0.996	1.267	9	9	9	0.980623	0.779399	-0.0282302	0.10824	0.894661	0.0790898	-0.160587	1.10188
305	K7GKD3	IGF2BP2	Insulin like growth factor 2 mRNA binding protein 2 OS=Sus scrofa OX=9823 GN=IGF2BP2 PE=1 SV=4	1.063	1.045	0.955	1.122	0.98	1.093	1.107	1.042	1.097	1.155	0.81	1.024	0.98	0.97	1.037	1.038	0.906	0.918	1.102	1.198	1.134	1.14	1.113	1.352	0.919	0.918	0.948	9	9	9	0.967427	0.504668	-0.0477757	0.296994	0.899634	0.0793457	-0.152591	1.10048
989	A0A287BJ65	LCN2	Lipocalin 2 OS=Sus scrofa OX=9823 GN=LCN2 PE=1 SV=2	0.944	1.156	1.002	1.331	0.91	0.938	0.96	1.048	1.009	1.024	0.899	1.089	0.941	1.166	1.24	1.107	0.982	0.948	0.781	0.853	0.897	1.05	0.957	0.909	1.102	0.989	1.005	9	9	9	1.08838	0.15295	0.122178	0.815451	1.09985	0.0799087	0.137304	1.09741
71	Q5G6V9	CFL2	Cofilin-2 OS=Sus scrofa OX=9823 GN=CFL2 PE=2 SV=4	0.782	0.781	1.042	0.939	1.05	1.178	1.089	0.988	0.964	0.856	1.021	0.935	1.076	1.244	1.136	0.954	1.076	1.004	0.831	1.091	0.914	0.908	0.835	0.83	1.08	0.978	0.975	9	9	9	1.04395	0.469729	0.0620484	0.328153	1.10187	0.0807522	0.139956	1.09285
308	A0A5G2QLH6	TOMM40	Mitochondrial import receptor subunit TOM40 homolog OS=Sus scrofa OX=9823 GN=TOMM40 PE=1 SV=1	1.147	1.14	1.017	0.978	0.779	1.045	1.031	1.08	1.185	1.022	1.068	1.019	0.838	0.887	0.911	1.242	1.264	1.102	0.871	1.12	0.938	0.769	0.843	0.791	1.112	0.979	0.818	9	9	9	1.14088	0.0457942	0.190148	1.33919	1.13494	0.0808568	0.18261	1.09228
3038	A0A286ZRK0	LOC100622780	Thymopoietin OS=Sus scrofa OX=9823 GN=LOC100622780 PE=1 SV=2	0.582	1.657	1.345	1.005	1.287	0.553	0.902	1.374	1.175	0.701	0.892	1.051	0.905	0.516	0.599	0.695	0.8	0.961	1.344	0.941	1.322	0.834	0.754	1.076	0.746	0.632	1.53	9	9	9	1.07637	0.638105	0.106174	0.195108	0.775684	0.0809226	-0.36646	1.09193
329	A0A286ZMQ7	RAB12	RAB12, member RAS onco family OS=Sus scrofa OX=9823 GN=RAB12 PE=3 SV=2	1.05	1.295	1.258	1.131	1.316	0.851	0.972	1.006	0.893	1.171	1.154	1.073	1.105	0.95	0.984	1.095	1.029	0.998	1.045	1.103	0.902	1.022	0.927	1.159	0.864	0.927	0.876	9	9	9	1.10731	0.144042	0.147058	0.841511	1.08317	0.0810411	0.115263	1.09129
1185	I3L6U9	GNA11	Guanine nucleotide-binding protein subunit alpha OS=Sus scrofa OX=9823 GN=GNA11 PE=3 SV=1	0.944	0.963	1.035	0.953	0.991	0.891	0.881	1.06	1.237	1.009	0.966	0.952	1.034	1.022	0.897	0.947	0.837	0.847	0.998	1.089	1.136	0.907	1.013	0.93	1.004	0.953	1.066	9	9	9	0.984499	0.726906	-0.0225388	0.138521	0.935686	0.0810485	-0.0959036	1.09125
926	A0A286ZPT3	RAB43	Ras-related protein Rab-10 OS=Sus scrofa OX=9823 GN=RAB43 PE=3 SV=1	1.072	1.068	1.053	0.983	1.157	0.86	1.102	0.804	0.88	0.976	0.993	1.091	1.118	0.897	0.898	1.019	1.11	0.935	0.995	1.02	1.103	1.482	1.156	1.078	0.986	1.015	1.231	9	9	9	0.892013	0.0907835	-0.164864	1.04199	0.897775	0.0814213	-0.155575	1.08926
660	A0A287APV2	MYO18A	Myosin XVIIIA OS=Sus scrofa OX=9823 GN=MYO18A PE=1 SV=2	1.037	0.943	0.952	1.102	1.077	0.919	0.968	1.021	1.013	1.043	0.988	0.96	1.068	0.789	1.129	0.994	0.946	0.89	0.969	1.073	1.061	0.945	1.364	1.25	1.029	0.919	1.237	9	9	9	0.917234	0.133361	-0.124639	0.874972	0.894384	0.0816282	-0.161034	1.08816
246	A0A287AKN3	CHP2	Calcineurin like EF-hand protein 2 OS=Sus scrofa OX=9823 GN=CHP2 PE=3 SV=1	1.012	0.916	0.925	0.875	0.941	1.153	0.958	1.027	1.195	0.879	0.89	0.834	0.93	1.139	0.981	1.027	0.921	0.862	0.93	0.984	1.041	1.012	0.999	1.191	0.978	0.967	1.036	9	9	9	0.985117	0.73696	-0.0216329	0.132556	0.926133	0.0824844	-0.110709	1.08363
1648	A0A480LC98	TIMM50	Mitochondrial import inner membrane translocase subunit TIM50 OS=Sus scrofa OX=9823 GN=TIMM50 PE=1 SV=1	0.995	0.978	1.001	1.016	0.826	0.804	1.02	0.916	1.136	1	1.161	1.094	0.946	0.86	1.059	1.139	1.056	0.927	0.939	1.016	1.107	0.75	0.736	1.012	0.884	0.935	0.978	9	9	9	1.04009	0.495602	0.056703	0.304867	1.1059	0.0825684	0.14522	1.08319
837	A0A480I6I0	COL14A1	Collagen alpha-1(XIV) chain OS=Sus scrofa OX=9823 GN=COL14A1 PE=1 SV=1	0.948	0.969	0.944	1.135	1.052	1.053	0.934	0.974	0.926	0.975	1.104	0.964	1.072	1.093	1.114	1.084	1.014	0.962	0.912	1.054	0.85	1.028	0.983	0.914	0.992	1.134	0.908	9	9	9	1.01823	0.645065	0.0260686	0.190397	1.06917	0.0831039	0.0964964	1.08038
191	A0A8W4FAG3	CFL1	Cofilin-1 OS=Sus scrofa OX=9823 GN=CFL1 PE=1 SV=1	1.039	1.097	1.178	1.089	1.196	1.032	1.206	1.104	0.931	0.898	1.244	1.071	1.158	1.052	0.934	0.895	1.033	1.24	1.042	0.923	0.993	0.981	0.882	0.858	1.056	0.977	0.957	9	9	9	1.13877	0.00264909	0.187477	2.5769	1.09874	0.0833059	0.135854	1.07932
457	A0A8W4FGC5	ACSS1	Propionate--CoA ligase OS=Sus scrofa OX=9823 GN=ACSS1 PE=1 SV=1	1.097	0.96	1.012	1.053	1.015	1.021	1.029	1.023	0.961	1.009	0.866	0.863	0.983	0.987	0.94	1	1.065	0.965	1.045	1.012	1.166	0.897	1.073	0.97	1.013	1.049	1.001	9	9	9	0.994039	0.832545	-0.00862624	0.0795923	0.940603	0.0835609	-0.0883427	1.078
1930	F1RHJ2	HDGF	Heparin binding growth factor OS=Sus scrofa OX=9823 GN=HDGF PE=1 SV=2	1.049	0.9	0.918	0.881	0.998	1.101	1.061	0.958	1.045	1.088	0.997	0.984	1.044	1.054	0.982	0.958	0.972	0.967	0.859	0.855	0.928	1.037	0.951	0.889	1.075	1.04	0.85	9	9	9	1.05033	0.247596	0.0708427	0.606257	1.06624	0.0837391	0.0925354	1.07707
959	I3L995	LRRC59	Leucine rich repeat containing 59 OS=Sus scrofa OX=9823 GN=LRRC59 PE=1 SV=4	1.054	1.125	1.048	1.031	1.044	1.228	1.097	1.043	0.972	1.065	1.009	0.907	1.02	0.965	1.03	1.06	0.996	0.97	0.998	1.121	1.032	0.983	1.267	1.235	1.047	1.001	1.009	9	9	9	0.994738	0.897117	-0.00761082	0.0471511	0.930775	0.0837524	-0.103496	1.077
27	A0A287A3W3	PYCR3	Pyrroline-5-carboxylate reductase OS=Sus scrofa OX=9823 GN=PYCR3 PE=1 SV=1	1.079	0.958	0.913	1.078	1.004	0.909	1.046	0.999	1.092	1.052	0.97	0.887	0.972	1.057	1.041	1.039	1	1.016	1.031	0.994	1.043	1.009	1.182	1.235	0.977	1.006	1.204	9	9	9	0.937713	0.125131	-0.0927816	0.902635	0.933168	0.0845438	-0.0997912	1.07292
178	A0A8W4FKP8	LOC100513601	Ig-like domain-containing protein OS=Sus scrofa OX=9823 GN=LOC100513601 PE=1 SV=1	1.056	1.092	1.141	1.179	1.094	1.214	1.093	1.708	1.346	0.96	0.852	0.985	0.91	0.958	1.148	1.399	0.781	0.963	0.822	0.848	0.974	0.793	0.988	0.964	0.802	0.799	0.835	9	9	9	1.39591	0.000772003	0.481206	3.11238	1.14454	0.0845789	0.194764	1.07274
259	A0A4X1U2C1	TMED5	Transmembrane emp24 domain-containing protein 5 OS=Sus scrofa OX=9823 GN=TMED5 PE=1 SV=1	1.11	1.092	1.014	1.074	0.938	0.797	0.98	1.081	1.067	1.038	0.886	0.961	1.019	0.84	0.917	0.905	0.844	0.964	1.011	1.004	1.067	0.889	1.081	1.148	0.87	0.908	1.058	9	9	9	1.01295	0.78234	0.0185604	0.106605	0.926737	0.0846619	-0.109767	1.07231
292	A0A287AA77	ACTG1	Actin, cytoplasmic 2 OS=Sus scrofa OX=9823 GN=ACTG1 PE=1 SV=1	1.05	0.895	0.951	0.95	0.961	1.084	1.041	1.1	1.147	1.017	0.942	0.934	0.917	1.056	1.061	1.021	0.969	1.034	0.937	0.987	0.937	0.915	0.88	0.97	1.039	0.994	0.82	9	9	9	1.08256	0.0449898	0.114443	1.34689	1.05567	0.0849429	0.0781547	1.07087
2725	A0A287ASZ5	SRSF7	Serine and arginine rich splicing factor 7 OS=Sus scrofa OX=9823 GN=SRSF7 PE=1 SV=1	1.088	1.099	1.118	1.08	1.109	0.891	1.147	1.222	1.182	1.038	0.928	1.002	0.971	0.926	0.903	0.959	1.028	0.995	1.064	1.02	0.999	0.939	1.153	1.082	0.978	0.933	1.06	9	9	9	1.07672	0.0617969	0.106647	1.20903	0.948201	0.0850691	-0.076735	1.07023
1268	A0A5G2RHL1	SAFB2	Scaffold attachment factor B2 OS=Sus scrofa OX=9823 GN=SAFB2 PE=1 SV=2	0.962	1.131	1.42	1.368	1.217	0.88	1.104	1.28	1.145	1.034	0.953	1.178	1.092	0.883	1.017	0.864	0.9	1.164	1.398	1.023	1.114	1.016	1.391	1.158	0.917	0.957	1.365	9	9	9	1.01625	0.83248	0.0232542	0.0796262	0.878712	0.085356	-0.186538	1.06877
83	A0A5G2RAG2	DSTN	Destrin OS=Sus scrofa OX=9823 GN=DSTN PE=3 SV=2	0.793	0.969	1.19	1.107	1.158	1.106	0.997	1.144	1.128	0.957	0.938	0.906	1.054	1.268	1.016	0.987	1.009	1.076	0.911	1.12	0.821	0.896	0.42	0.627	1.176	0.929	0.874	9	9	9	1.23386	0.03903	0.303175	1.4086	1.18485	0.0853885	0.244701	1.0686
2175	A0A8W4FGA3	EIF3H	Eukaryotic translation initiation factor 3 subunit H OS=Sus scrofa OX=9823 GN=EIF3H PE=1 SV=1	1.15	1.031	1.014	0.989	0.896	1.047	1.131	0.672	0.729	1.146	0.962	1.013	1.028	1.214	1.037	1.095	1.049	0.929	1	1.031	0.969	0.944	0.823	0.873	1.041	1.097	1.017	9	9	9	0.984537	0.813055	-0.0224832	0.0898803	1.07709	0.0856048	0.107138	1.0675
2793	F6QAP1	CTNNB1	Catenin beta-1 OS=Sus scrofa OX=9823 GN=CTNNB1 PE=1 SV=2	1.05	0.985	1.013	0.937	0.982	1.062	1.012	1.021	1.024	0.978	0.877	1.058	0.907	0.911	0.909	0.996	0.942	0.918	1.033	0.98	1.046	1.01	0.904	0.989	0.937	0.961	1.191	9	9	9	1.00387	0.900147	0.00556811	0.0456865	0.938681	0.0860535	-0.0912934	1.06523
2534	A0A286ZL65	RPL15	Ribosomal protein L15 OS=Sus scrofa OX=9823 GN=RPL15 PE=1 SV=1	0.951	1.348	1.242	0.98	1.014	0.687	0.96	1.153	1.011	0.839	0.919	1.065	0.98	0.74	0.819	0.809	0.813	0.918	1.202	0.909	1.124	0.85	1.015	0.89	0.913	0.93	0.921	9	9	9	1.06763	0.395293	0.0944067	0.403081	0.902673	0.0865946	-0.147725	1.06251
63	F1RF44	SLC2A4	Solute carrier family 2, facilitated glucose transporter member 4 OS=Sus scrofa OX=9823 GN=SLC2A4 PE=3 SV=3	0.86	1.025	1.049	1.078	1.172	1.286	1.101	1.17	1.191	0.941	0.904	0.907	0.968	1.232	1.133	1.131	1.164	1.115	0.884	1.113	0.914	0.861	0.87	0.961	1.04	1.009	1.006	9	9	9	1.14715	0.0128681	0.19805	1.89049	1.09667	0.0867135	0.133134	1.06191
132	A0A5S6IE01	ACTA1	Actin, alpha skeletal muscle OS=Sus scrofa OX=9823 GN=ACTA1 PE=1 SV=2	0.756	0.87	0.92	0.964	1.059	1.194	0.886	1.21	1.333	1.089	1.12	0.939	0.918	1.126	1.107	1.011	1.059	1.061	1.127	1.01	0.894	0.853	0.748	0.903	1.213	0.886	0.878	9	9	9	1.07989	0.358474	0.110881	0.445542	1.10785	0.0867384	0.14776	1.06179
296	A0A4X1UE92	SPTB	Spectrin beta chain OS=Sus scrofa OX=9823 GN=SPTB PE=1 SV=1	1.071	1.131	1.026	0.88	0.879	0.718	0.989	1.079	1.11	1.047	1.082	1.029	0.959	0.786	0.834	0.999	0.964	1.043	1.008	1.038	1.002	1.116	0.978	0.981	1.01	1.126	1.147	9	9	9	0.944397	0.272865	-0.0825343	0.564053	0.929513	0.0876433	-0.105453	1.05728
772	F1RQH5	MYO7B	Myosin VIIB OS=Sus scrofa OX=9823 GN=MYO7B PE=1 SV=3	1.11	1.047	1.121	1.004	1.031	1.15	1.022	1.157	1.235	1.054	0.932	0.957	1.052	1.029	1.077	1.096	0.965	0.969	1.101	1.033	1.174	0.97	1.145	1.26	1.056	1.012	0.998	9	9	9	1.01313	0.731617	0.0188187	0.135716	0.936609	0.0881099	-0.0944814	1.05498
1160	A0A287AL53	ABHD10	Abhydrolase domain containing 10, depalmitoylase OS=Sus scrofa OX=9823 GN=ABHD10 PE=1 SV=1	0.808	1.014	0.93	1.367	1.394	1.29	1.16	0.965	0.937	0.926	0.842	0.9	1.227	1.19	1.064	1.066	1.097	1.177	0.92	1.019	0.943	0.764	0.955	0.956	1.103	1.073	0.768	9	9	9	1.16045	0.0858188	0.214686	1.06642	1.11622	0.0882084	0.158623	1.05449
200	I3LI20	ABCD3	ATP binding cassette subfamily D member 3 OS=Sus scrofa OX=9823 GN=ABCD3 PE=3 SV=3	0.981	1.008	0.962	1.166	1.015	0.975	1.016	1.055	1.087	0.993	0.922	0.875	0.995	1.21	1.014	1.001	0.934	0.917	0.987	1.018	1.054	1.065	1.211	1.308	0.919	0.968	1.236	9	9	9	0.9487	0.286303	-0.0759768	0.543174	0.907332	0.0897382	-0.140298	1.04702
566	F1S475	PLCG2	1-phosphatidylinositol 4,5-bisphosphate phosphodiesterase gamma OS=Sus scrofa OX=9823 GN=PLCG2 PE=1 SV=3	1.045	1	1.021	1.056	0.984	0.973	0.97	0.923	0.946	1.037	0.876	0.961	0.984	0.967	1.044	0.94	1.005	0.912	0.989	1.059	0.952	0.991	1.117	1.087	0.91	1.008	1.108	9	9	9	0.96714	0.253366	-0.048203	0.596252	0.946318	0.0897955	-0.0796027	1.04675
314	F1S108	CISD2	CDGSH iron-sulfur domain-containing protein 2 OS=Sus scrofa OX=9823 GN=CISD2 PE=1 SV=2	1.09	0.97	1.108	1.111	1.058	1.045	1.091	1.253	1.292	1.037	0.899	0.95	0.976	1.109	0.957	1.115	1.07	1.081	1.024	1.073	0.968	1.005	1.221	1.202	1.103	1.06	1.194	9	9	9	1.01706	0.686988	0.0243989	0.163051	0.933401	0.0899862	-0.0994311	1.04582
2613	A0A5K1VBH1	PDHA1	Pyruvate dehydrogenase E1 component subunit alpha OS=Sus scrofa OX=9823 GN=PDHA1 PE=1 SV=1	0.993	0.949	1.052	0.972	0.961	0.997	1	1.153	1.219	1.002	0.856	0.962	0.971	0.909	0.933	0.948	0.997	0.899	0.966	1.019	0.965	0.881	1.103	1.086	0.997	0.964	0.953	9	9	9	1.04052	0.314112	0.0573038	0.502916	0.948847	0.0903462	-0.0757525	1.04409
2462	F1SLS9	NCAPD2	Condensin complex subunit 1 OS=Sus scrofa OX=9823 GN=NCAPD2 PE=3 SV=3	1.017	1.379	1.191	1.073	0.975	0.98	0.98	1.138	1.047	1.014	0.972	0.995	0.974	0.836	0.968	0.766	0.885	0.903	1.048	0.981	1.063	1.009	1.191	1.027	0.834	0.831	1.114	9	9	9	1.07496	0.219412	0.104285	0.65874	0.913717	0.0907647	-0.13018	1.04208
2792	A0A286ZPU3	XRN2	5'-3' exoribonuclease OS=Sus scrofa OX=9823 GN=XRN2 PE=1 SV=1	1.012	0.814	0.914	1.1	0.985	1	0.968	1.1	1.216	1.033	0.817	0.946	0.993	0.788	0.993	1.029	1	0.958	0.971	1.079	0.883	0.929	1.241	1.08	1.034	0.99	1.102	9	9	9	0.978515	0.678991	-0.0313335	0.168136	0.919218	0.0909195	-0.121521	1.04134
2203	A0A287BN06	PZP	Pregnancy zone protein OS=Sus scrofa OX=9823 GN=PZP PE=1 SV=3	0.836	1.288	1.011	0.997	0.995	1.152	1.104	0.652	0.676	0.638	0.954	0.714	0.731	0.73	1.42	0.747	0.865	0.794	0.883	0.897	0.598	1.921	0.975	1.119	1.12	1.182	1.263	9	9	9	0.874774	0.342739	-0.193018	0.465037	0.762503	0.091119	-0.391186	1.04039
387	A0A5G2QI11	MRPL43	Large ribosomal subunit protein mL43 OS=Sus scrofa OX=9823 GN=MRPL43 PE=1 SV=2	0.957	0.865	0.895	1.028	0.974	1.081	0.978	0.774	0.783	0.978	0.953	0.915	0.869	0.97	0.832	0.743	0.931	0.88	1.039	0.933	1.028	0.884	1.313	1.129	0.79	0.832	1.15	9	9	9	0.916135	0.223242	-0.126367	0.651224	0.887118	0.0912857	-0.172802	1.0396
1035	A0A5G2QY83	ITGB4	Integrin beta OS=Sus scrofa OX=9823 GN=ITGB4 PE=1 SV=1	1.026	0.933	0.819	0.889	1.037	0.683	0.94	0.863	0.844	1	0.94	0.849	0.911	0.611	0.711	0.979	0.968	0.865	1.034	0.983	0.977	0.838	0.825	1.137	0.875	0.973	1.433	9	9	9	0.885289	0.133711	-0.175779	0.873832	0.863251	0.0915828	-0.212149	1.03819
2800	A0A287AL38	TPP2	Tripeptidyl-peptidase 2 OS=Sus scrofa OX=9823 GN=TPP2 PE=1 SV=2	1.005	1.022	1.025	1.055	1.107	0.966	0.833	1.014	0.883	0.93	0.934	0.924	1.001	0.906	0.888	0.724	0.988	0.868	0.941	1.022	1	1.158	1.177	0.847	0.882	0.864	1.073	9	9	9	0.993976	0.90588	-0.00871722	0.0429293	0.910643	0.0916731	-0.135043	1.03776
45	F1SMN5	FLNC	Filamin C OS=Sus scrofa OX=9823 GN=FLNC PE=1 SV=1	0.741	0.928	1.143	0.925	1.002	1.051	0.979	1.038	0.994	0.895	0.958	0.912	1.019	1.313	1.094	0.984	1.053	1.124	0.936	1.143	0.939	0.919	0.729	0.796	1.104	0.854	0.939	9	9	9	1.05288	0.406511	0.0743371	0.390928	1.11879	0.0918131	0.161945	1.0371
47	Q2QLE3	TES	Testin OS=Sus scrofa OX=9823 GN=TES PE=3 SV=1	1.094	1.063	1.295	1.079	1.298	1.287	1.085	1.277	1.256	1.02	1.101	0.863	1.258	1.181	1.174	1.074	1.153	1.202	1.008	1.098	0.973	1.06	1.168	0.707	1.136	1.038	0.766	9	9	9	1.19879	0.00797765	0.261584	2.09812	1.11972	0.0918289	0.163142	1.03702
423	A0A5G2QH33	PHGDH	D-3-phosphoglycerate dehydrogenase OS=Sus scrofa OX=9823 GN=PHGDH PE=1 SV=1	0.974	1.087	0.993	1.14	0.802	1.053	0.962	0.622	0.583	1.025	0.933	0.949	0.862	0.844	1.037	0.794	0.929	0.817	1.015	1.088	0.782	0.988	1.247	1.37	0.785	1.292	0.91	9	9	9	0.866941	0.171016	-0.205994	0.766962	0.864198	0.0918594	-0.210567	1.03688
60	A0A480J826	TGM3	Protein-glutamine gamma-glutamyltransferase E OS=Sus scrofa OX=9823 GN=TGM3 PE=3 SV=1	0.907	1.111	1.057	1.046	1.062	1.007	0.981	1.069	1.156	1.112	0.98	1.091	0.881	0.986	0.924	0.994	1.026	1.061	1.028	0.903	1.019	0.838	0.998	0.956	0.926	0.882	0.971	9	9	9	1.10269	0.00862389	0.141024	2.0643	1.06267	0.092513	0.0876919	1.0338
1556	I3LV99	MYH14	Myosin heavy chain 14 OS=Sus scrofa OX=9823 GN=MYH14 PE=1 SV=2	1.093	0.897	0.873	0.872	0.919	0.925	0.968	1.036	1.064	0.995	0.967	0.887	0.963	0.946	0.899	1.024	0.965	0.927	1.068	1.025	1.151	0.844	0.998	1.102	0.923	0.951	1.115	9	9	9	0.942247	0.196991	-0.0858229	0.705553	0.934183	0.0935921	-0.0982225	1.02876
245	I3LPL7	GLG1	Golgi apparatus protein 1 OS=Sus scrofa OX=9823 GN=GLG1 PE=1 SV=4	0.745	1.039	0.954	0.913	0.853	0.755	1.05	0.833	0.768	0.691	0.79	0.69	1.127	0.793	0.96	0.815	1.034	1.071	1.162	1.161	0.946	0.809	0.999	1.152	0.866	0.977	1.024	9	9	9	0.869613	0.037557	-0.201555	1.42531	0.876319	0.0937999	-0.190472	1.0278
2710	A0A5G2QSD6	GLIPR2	GLI pathosis related 2 OS=Sus scrofa OX=9823 GN=GLIPR2 PE=1 SV=1	0.902	0.923	0.896	1.041	0.99	0.831	0.972	0.632	0.601	1.115	1.072	0.951	1.276	1.032	1.194	1.129	1.062	0.935	1.067	1.075	0.982	0.95	0.858	1.015	0.978	0.95	1.149	9	9	9	0.863032	0.0363658	-0.212514	1.43931	1.08223	0.0943258	0.114001	1.02537
1228	A0A287AZP0	MFAP4	Microfibril associated protein 4 OS=Sus scrofa OX=9823 GN=MFAP4 PE=4 SV=2	1.065	1.111	1.642	1.078	1.337	1.211	1.125	1.101	0.969	0.821	0.848	0.939	0.82	1.048	0.945	0.812	0.719	1.051	1.01	1.126	0.981	1.252	1.194	0.858	0.992	1.069	0.661	9	9	9	1.16362	0.0819233	0.218623	1.08659	0.875314	0.0948218	-0.192127	1.02309
96	F1S4V8	CPNE1	Copine 1 OS=Sus scrofa OX=9823 GN=CPNE1 PE=1 SV=3	1.043	0.969	0.9	0.959	0.96	0.733	1.084	0.9	0.984	0.975	0.985	1.076	1.008	0.818	0.889	0.867	0.987	0.993	1.097	1.039	1.013	0.921	1.119	1.053	0.919	0.923	1.285	9	9	9	0.910663	0.0920863	-0.135011	1.03581	0.917707	0.0950298	-0.123894	1.02214
117	F1RM45	APOE	Apolipoprotein E OS=Sus scrofa OX=9823 GN=APOE PE=1 SV=3	0.889	1.025	0.913	1.006	0.942	1.014	0.984	0.869	0.909	0.903	0.886	0.906	1.007	0.999	1.028	0.962	1.027	0.962	0.883	1.017	0.98	1.106	1.079	0.998	0.999	0.995	1.096	9	9	9	0.934229	0.0424001	-0.0981515	1.37263	0.948323	0.0951542	-0.0765496	1.02157
525	A0A287AG13	APOB	Apolipoprotein B OS=Sus scrofa OX=9823 GN=APOB PE=1 SV=1	0.903	1.122	1.011	1.091	1.011	0.982	0.986	0.953	1.087	0.957	0.942	0.818	1.089	1.11	1.054	0.921	0.984	0.964	0.972	0.967	1.005	1.252	1.262	1.146	1.003	1.099	0.949	9	9	9	0.947281	0.253062	-0.0781353	0.596773	0.915484	0.0952464	-0.127393	1.02115
2254	A0A5G2QWJ7	CTTN	Cortactin OS=Sus scrofa OX=9823 GN=CTTN PE=1 SV=1	1.044	1.155	1.114	1.077	1.038	0.753	1.033	0.937	0.889	1.029	1.025	1.094	1.072	0.782	0.893	0.923	0.907	0.962	1.145	1.046	1.096	0.982	1.045	0.95	1.042	0.913	1.164	9	9	9	0.963445	0.46056	-0.0537265	0.336714	0.925823	0.0955039	-0.111191	1.01998
2124	A0A287BDI2	LOC100154047	Peptidase S1 domain-containing protein OS=Sus scrofa OX=9823 GN=LOC100154047 PE=4 SV=3	0.987	0.974	0.787	1.932	0.85	0.874	0.968	0.912	0.949	1.01	0.939	1.154	0.925	1.005	1.137	1.426	1.344	0.947	0.848	1.074	0.97	0.851	0.908	1.048	1.034	0.949	1.092	9	9	9	1.05231	0.679319	0.0735648	0.167926	1.12685	0.0956785	0.172298	1.01919
727	A0A8W4FMQ4	KCTD12	Potassium channel tetramerization domain containing 12 OS=Sus scrofa OX=9823 GN=KCTD12 PE=1 SV=1	0.995	1.002	0.974	1.003	1.016	0.87	0.981	0.896	0.872	0.997	1.093	0.953	0.982	0.996	1.014	1.046	1	1.049	1.024	1.019	0.966	0.879	0.855	0.987	0.987	0.936	1.054	9	9	9	0.988745	0.719816	-0.0163301	0.142779	1.04858	0.0958775	0.0684391	1.01828
2958	F1S084	HAT1	Histone acetyltransferase type B catalytic subunit OS=Sus scrofa OX=9823 GN=HAT1 PE=1 SV=5	0.656	0.749	1.128	1.117	0.99	0.943	1.009	1.081	1.1	0.764	0.73	0.772	0.901	0.744	0.882	0.967	1.112	0.959	0.788	1.188	0.798	0.849	1.151	1.107	0.948	0.951	1.14	9	9	9	0.98352	0.834875	-0.0239734	0.0783785	0.877915	0.0961133	-0.187847	1.01722
24	A0A287B6B6	MAP7	Microtubule associated protein 7 OS=Sus scrofa OX=9823 GN=MAP7 PE=1 SV=3	0.781	1.037	1.112	1.083	1.008	1.25	0.981	1.08	1.074	0.927	0.88	0.951	0.994	1.252	1.067	1.046	0.949	0.968	0.806	1.039	1.041	0.821	0.83	0.926	1.095	0.87	0.698	9	9	9	1.15752	0.0322712	0.211036	1.49118	1.11174	0.0973172	0.15282	1.01181
2264	F1S0Z3	MTTP	Microsomal triglyceride transfer protein large subunit OS=Sus scrofa OX=9823 GN=MTTP PE=4 SV=1	1.06	1.036	1.102	0.896	1.073	1.41	1.226	0.92	1.486	1.039	0.825	0.969	1.018	1.064	1.054	1.207	0.889	0.974	1.223	0.97	0.954	1.112	1.274	1.023	1.264	0.913	1.34	9	9	9	1.0135	0.863367	0.0193481	0.0638044	0.897349	0.0975848	-0.156258	1.01062
556	D3K5N7	ELAVL1	ELAV-like protein OS=Sus scrofa OX=9823 GN=ELAVL1 PE=1 SV=1	1.003	0.967	1.046	1.025	0.949	0.902	1.059	0.946	1.114	0.982	0.918	0.876	0.973	0.911	0.928	0.954	0.926	0.915	1.064	0.889	0.97	0.899	1.047	0.972	0.908	0.994	1.043	9	9	9	1.02561	0.438234	0.0364807	0.358294	0.954132	0.0976416	-0.0677399	1.01037
150	A0A4X1VG91	SMC4	Structural maintenance of chromosomes protein OS=Sus scrofa OX=9823 GN=SMC4 PE=1 SV=1	1.039	1.001	0.96	1.208	0.987	0.977	1.141	1.294	1.131	0.963	0.877	1.012	1.008	0.844	1.006	0.953	0.975	1.118	0.972	0.923	0.987	1.081	1.29	1.263	0.966	0.938	1.299	9	9	9	1.00195	0.974917	0.00281762	0.0110325	0.900916	0.0977681	-0.150536	1.0098
1452	A0A8W4FMN5	DHRS4	Dehydrogenase/reductase (SDR family) member 4 OS=Sus scrofa OX=9823 GN=DHRS4 PE=1 SV=1	0.982	1.104	1.069	1.064	0.927	0.971	0.96	0.91	0.957	1.01	0.929	0.979	1.003	0.929	0.936	0.868	0.902	0.936	1.06	1.017	1.094	0.987	0.965	0.975	0.871	0.914	1.205	9	9	9	0.984155	0.697742	-0.0230426	0.156305	0.934419	0.0981178	-0.0978585	1.00825
2626	A0A287ABR0	INPP5D	phosphatidylinositol-3,4,5-trisphosphate 5-phosphatase OS=Sus scrofa OX=9823 GN=INPP5D PE=3 SV=2	0.983	1.021	1.168	0.994	0.962	1.057	1.037	1.122	1.105	0.916	0.923	0.951	0.892	0.908	0.981	0.865	0.965	0.976	0.943	0.968	0.957	0.888	1.128	0.995	0.942	0.994	0.971	9	9	9	1.07546	0.0341441	0.104955	1.46668	0.953449	0.0982563	-0.0687728	1.00764
228	P08059	GPI	Glucose-6-phosphate isomerase OS=Sus scrofa OX=9823 GN=GPI PE=1 SV=3	1.075	1.097	1.112	1.043	1.065	1.154	1.07	1.139	1.097	0.997	1.014	1.037	0.994	1.086	0.996	1.022	1.01	1.097	0.993	0.898	1.045	1.009	0.988	0.817	1.008	1.095	0.884	9	9	9	1.12762	0.00248928	0.173279	2.60393	1.05906	0.0991141	0.0827832	1.00386
235	Q8HXL4	TBCB	Cytoskeleton-associated protein 1 OS=Sus scrofa OX=9823 GN=TBCB PE=1 SV=1	0.96	1.152	1.173	1.058	1.052	0.833	1.108	0.893	0.966	0.929	1.12	1.029	0.909	0.911	1.071	1.062	0.975	0.991	1.006	0.991	1.029	0.805	0.84	0.786	0.977	0.97	0.964	9	9	9	1.09883	0.0835989	0.135967	1.0778	1.07517	0.0999609	0.104561	1.00017
2081	A0A287A070	FBXO6	F-box protein 6 OS=Sus scrofa OX=9823 GN=FBXO6 PE=1 SV=1	1.01	1.174	1.237	1.065	1.156	0.785	1.031	1.151	1.06	0.894	0.862	0.987	0.99	0.861	0.912	0.849	0.923	0.924	1.056	0.8	0.997	1.09	1.021	0.897	0.962	0.883	1.14	9	9	9	1.09304	0.128477	0.128341	0.891173	0.927199	0.100834	-0.109049	0.996395
585	I3LF70	MKI67	Marker of proliferation Ki-67 OS=Sus scrofa OX=9823 GN=MKI67 PE=1 SV=2	1.005	1.048	1.044	1.125	0.998	0.882	1.017	0.967	0.949	1	0.863	0.916	0.974	0.924	0.947	0.813	0.996	0.83	0.876	0.997	0.888	1.003	1.166	1.114	0.84	0.967	1.156	9	9	9	1.00311	0.947956	0.00447794	0.0232119	0.917398	0.101794	-0.124381	0.992278
639	K7GQ95	S100A2	S100 calcium binding protein A2 OS=Sus scrofa OX=9823 GN=S100A2 PE=1 SV=2	0.776	1.152	1.036	0.725	0.79	0.955	0.904	0.818	0.795	0.882	1.033	1.294	1.048	1.979	1.087	0.891	0.928	1.134	0.773	0.978	1.2	1.12	0.683	0.696	1.013	0.809	0.964	9	9	9	0.965396	0.688073	-0.0508075	0.162365	1.24769	0.103419	0.319263	0.9854
16	F1S663	LAMC1	Laminin subunit gamma 1 OS=Sus scrofa OX=9823 GN=LAMC1 PE=1 SV=4	0.852	0.956	1.06	0.985	1.104	1.081	0.969	1.068	1.056	0.965	0.904	0.87	1.061	1.218	1.126	0.985	1.04	1.02	0.937	1.091	0.904	0.82	0.776	1.01	0.992	0.922	0.986	9	9	9	1.08213	0.0863348	0.113872	1.06381	1.089	0.103641	0.123007	0.984466
82	F1RKW8	PSMD11	26S proteasome non-ATPase regulatory subunit 11 OS=Sus scrofa OX=9823 GN=PSMD11 PE=1 SV=3	1.081	0.995	1.079	0.972	0.955	0.871	1.018	1.053	0.939	1.073	0.898	1.006	1.005	0.844	0.938	0.902	0.899	1.005	0.993	0.959	1.026	0.942	1.212	1.186	1.026	1.001	0.897	9	9	9	0.969812	0.476282	-0.0442234	0.322136	0.927288	0.104318	-0.10891	0.981643
915	A0A286ZJD8	DPP7	Dipeptidyl peptidase 7 OS=Sus scrofa OX=9823 GN=DPP7 PE=1 SV=2	0.927	0.965	0.819	0.873	0.9	0.802	0.789	0.673	0.745	0.853	0.953	0.931	0.883	0.856	0.843	0.853	0.777	0.758	0.989	0.938	0.905	0.924	0.942	0.861	0.871	0.867	0.828	9	9	9	0.922215	0.0684311	-0.116824	1.16475	0.948554	0.104402	-0.0761984	0.98129
985	F1RKQ8	CPSF7	Cleavage and polyadenylation specific factor 7 OS=Sus scrofa OX=9823 GN=CPSF7 PE=1 SV=3	0.996	0.96	0.887	1.043	0.96	0.83	1.002	0.833	0.753	1.004	1.004	1.023	1.026	0.978	1.072	0.943	1.032	0.93	1.044	1.083	1.045	0.975	1.092	1.229	0.94	0.981	1.183	9	9	9	0.863351	0.00563078	-0.21198	2.24943	0.941496	0.104548	-0.0869731	0.980685
272	A0A287BQT2	ACO1	Cytoplasmic aconitate hydratase OS=Sus scrofa OX=9823 GN=ACO1 PE=1 SV=1	1.012	1.063	1.08	1.023	0.991	1.036	1.029	0.919	0.911	1	1	1.005	1.019	1.016	0.983	0.956	1.007	1.018	1.025	0.969	1.017	0.904	1.032	0.923	0.995	0.924	0.926	9	9	9	1.04005	0.151352	0.0566472	0.820011	1.03316	0.104684	0.0470654	0.980119
74	I3LPB5	CKB	Creatine kinase B-type OS=Sus scrofa OX=9823 GN=CKB PE=3 SV=2	0.769	0.888	0.979	0.982	0.99	1.185	0.962	1.074	1.049	0.893	0.959	0.864	0.938	1.168	1.059	1.004	1.053	0.991	0.863	1.079	0.892	0.748	0.672	0.914	1.052	0.857	1.003	9	9	9	1.09876	0.154508	0.135879	0.811048	1.10507	0.105001	0.144143	0.978805
564	A0A287B770	SRSF10	Serine and arginine rich splicing factor 10 OS=Sus scrofa OX=9823 GN=SRSF10 PE=1 SV=2	0.928	0.969	0.949	1.007	1.032	0.923	1.068	1.047	1.131	0.929	0.834	0.91	0.89	0.967	0.922	1.11	1.019	0.915	1.011	1.019	0.927	0.901	1.128	1.095	0.965	1.015	0.993	9	9	9	1	1	0	0	0.93837	0.105026	-0.0917715	0.978701
924	F1SFI7	AHSG	Alpha-2-HS-glycoprotein OS=Sus scrofa OX=9823 GN=AHSG PE=1 SV=3	0.969	0.991	0.971	1.003	0.902	1.016	1.175	1.103	1.17	0.888	0.976	0.851	1.01	1.113	1.182	1.064	0.975	1.147	0.863	0.956	0.808	0.958	0.843	0.831	1.186	0.984	0.943	9	9	9	1.11085	0.0556813	0.151658	1.25429	1.09962	0.105302	0.137002	0.977562
1598	A0A5G2R074	ELAC2	Zinc phosphodiesterase ELAC protein 2 OS=Sus scrofa OX=9823 GN=ELAC2 PE=1 SV=2	1.055	1.083	1.121	1.218	1.093	1.15	1.134	1.279	1.206	1.031	0.86	0.903	0.942	0.929	1.064	0.975	1.039	1.242	1.144	1.114	1.019	0.875	1.298	1.204	1.13	1.022	1.038	9	9	9	1.05028	0.26717	0.0707801	0.573213	0.912739	0.105732	-0.131726	0.975792
1127	F2Z4Y1	YWHAH	Tyrosine 3-monooxygenase/tryptophan 5-monooxygenase activation protein eta OS=Sus scrofa OX=9823 GN=YWHAH PE=1 SV=2	1.006	0.938	0.91	0.958	1.072	1.065	1.067	0.864	0.87	0.929	0.992	0.947	1.019	1.056	1.029	1.025	1.06	1.005	1.01	1.004	0.971	0.894	0.859	0.783	1.048	1.056	0.888	9	9	9	1.02784	0.539443	0.0396154	0.268055	1.06449	0.105733	0.0901619	0.975791
1840	A0A8D1IV93	IQGAP1	IQ motif containing GTPase activating protein 1 OS=Sus scrofa OX=9823 GN=IQGAP1 PE=1 SV=1	1.099	0.951	0.943	1.053	1.012	1.097	0.983	0.975	0.984	1.04	0.991	1.012	1.009	1.059	1.049	1.076	1.005	0.993	0.95	1.013	1.003	0.999	0.968	0.946	1.036	1.086	0.931	9	9	9	1.01847	0.485946	0.0264076	0.313412	1.03381	0.106765	0.0479725	0.971573
166	F1RZM4	LAMA4	Laminin subunit alpha 4 OS=Sus scrofa OX=9823 GN=LAMA4 PE=1 SV=4	0.95	1.096	0.967	1.023	1.103	0.905	0.978	0.957	0.967	0.94	1.107	1.041	1.129	0.934	1.011	1.01	1.018	1.008	0.93	1.046	1.041	0.881	0.874	1.023	1.029	0.943	0.948	9	9	9	1.02651	0.432324	0.0377421	0.364191	1.05542	0.106836	0.0778195	0.971284
2238	P82125	AKR1E2	1,5-anhydro-D-fructose reductase OS=Sus scrofa OX=9823 GN=AKR1E2 PE=1 SV=2	1.14	1.118	1.243	0.956	1.052	0.996	1.107	1.107	1.089	1.136	1.027	0.844	1.055	0.972	0.945	1.022	0.997	0.859	1.145	0.96	1.349	0.971	1.061	0.904	1.226	1.051	1.057	9	9	9	1.00864	0.866201	0.0124091	0.0623811	0.910839	0.107327	-0.134732	0.96929
167	A0A5G2R660	SCAMP2	Secretory carrier-associated membrane protein OS=Sus scrofa OX=9823 GN=SCAMP2 PE=1 SV=1	0.951	0.995	0.929	1.073	1.07	1.047	1.064	0.928	0.899	0.98	0.958	0.973	1.071	0.926	1.001	0.943	1.025	0.994	1.022	1.006	1.012	1.233	1.261	1.099	0.915	0.876	1.264	9	9	9	0.924443	0.160725	-0.113344	0.793917	0.915669	0.107915	-0.127102	0.966916
269	A0A481AHI1	PTER	Phosphotriesterase-related protein OS=Sus scrofa OX=9823 GN=PTER PE=1 SV=1	1.172	1.039	1.054	1.098	1.111	1.062	1.143	1.209	1.258	1.156	1.022	0.954	1.151	1.08	1.11	1.026	1.108	1.123	1.008	1.067	1.002	0.86	0.84	1.017	1.026	1.05	1.202	9	9	9	1.11839	0.0162317	0.161419	1.78964	1.07253	0.108215	0.101019	0.965713
249	A0A8D1P4F3	PLOD3	procollagen-lysine 5-dioxygenase OS=Sus scrofa OX=9823 GN=PLOD3 PE=1 SV=1	1.016	1.048	0.919	1.043	0.941	0.876	0.968	0.957	0.91	1.062	1	0.935	0.956	0.99	1.067	1.026	0.986	0.937	1.014	1.072	1.094	0.967	1	1.053	0.96	1.061	1.111	9	9	9	0.929919	0.0164319	-0.104824	1.78431	0.96003	0.108541	-0.0588486	0.964407
46	F1RMW7	CD177	CD177 molecule OS=Sus scrofa OX=9823 GN=CD177 PE=1 SV=2	0.873	1.033	0.889	1.41	1.01	0.764	0.899	1.178	0.994	0.985	0.776	1.074	0.842	1.076	1.085	1.268	0.994	1.144	0.802	0.958	0.883	0.828	0.828	1.106	0.979	0.919	1.014	9	9	9	1.08813	0.281356	0.121855	0.550743	1.11146	0.10878	0.152454	0.963451
624	A0A287BHP7	UQCRC1	Ubiquinol-cytochrome c reductase core protein 1 OS=Sus scrofa OX=9823 GN=UQCRC1 PE=1 SV=1	1.037	0.981	1.011	1.07	0.98	0.976	0.978	1.023	1.142	1.038	0.955	0.921	1.025	1.026	1.019	0.972	0.98	0.951	0.999	1.04	1.025	0.92	1.123	1.104	0.999	0.972	1.157	9	9	9	0.984902	0.627188	-0.0219479	0.202602	0.951601	0.108998	-0.0715716	0.96258
440	A0A287BEC7	VAMP3	Vesicle-associated membrane protein 3 OS=Sus scrofa OX=9823 GN=VAMP3 PE=1 SV=3	1.051	1.02	0.962	1.037	1.1	1.216	1.095	1.118	1.101	1.124	1.022	0.928	1.107	1.151	1.158	1.129	1.093	1.041	1.041	1.063	0.976	1.026	0.924	1.066	1.111	1.054	1.02	9	9	9	1.04515	0.142391	0.0637045	0.846518	1.05086	0.109252	0.0715658	0.961572
84	F1RQ01	FERMT3	FERM domain containing kindlin 3 OS=Sus scrofa OX=9823 GN=FERMT3 PE=1 SV=4	1.065	1.011	0.961	1.117	0.907	1.055	1.038	1.023	1.078	1.073	0.874	0.975	0.977	0.867	1.002	0.998	1.028	0.957	0.958	0.997	0.978	1.005	1.192	1.121	0.936	1.111	1.011	9	9	9	0.994199	0.868836	-0.00839321	0.0610621	0.940058	0.109262	-0.0891783	0.961531
2878	A0A8D1HEQ6	CHP1	Calcineurin B homologous protein 1 OS=Sus scrofa OX=9823 GN=CHP1 PE=1 SV=1	0.96	1.179	1.098	1.085	1.012	0.974	1.015	1.197	1.15	0.978	1.114	0.965	0.984	0.848	0.925	0.968	1.014	1.012	0.997	0.977	1.016	1.01	1.187	1.211	0.982	0.965	1.056	9	9	9	1.02861	0.492168	0.0407017	0.307886	0.936922	0.10962	-0.0939998	0.960112
2931	F1S8I4	MOB3A	MOB kinase activator 3A OS=Sus scrofa OX=9823 GN=MOB3A PE=4 SV=3	0.947	1.455	1.386	1.258	1.17	0.748	1.356	1.585	1.424	1.021	0.989	1.18	1.006	0.724	0.803	0.765	1.033	1.09	1.025	0.987	1.176	1.111	1.094	1.242	0.908	0.844	1.442	9	9	9	1.15261	0.142052	0.204904	0.847554	0.876081	0.109825	-0.190864	0.959298
490	F1SMW8	SERPINB10	Serpin B10 OS=Sus scrofa OX=9823 GN=SERPINB10 PE=3 SV=1	1.094	1.001	0.952	1.111	1.056	1.307	1.139	1.243	1.483	1.022	1.075	1.049	0.97	1.037	1.222	1.11	1.218	1.216	0.997	0.878	0.945	0.846	1.07	0.98	1.199	1.164	1.061	9	9	9	1.13632	0.0607207	0.184374	1.21666	1.08523	0.110194	0.118001	0.957842
2655	A0A5G2QK01	ADPGK	ADP dependent glucokinase OS=Sus scrofa OX=9823 GN=ADPGK PE=1 SV=1	0.882	1.03	1.115	1.043	1.022	1.072	1.039	0.959	1.011	0.941	0.971	0.948	0.884	1.097	1.023	0.942	0.91	0.907	0.923	0.962	0.953	1.007	1.061	1.023	0.962	1.112	1.098	9	9	9	1.00791	0.803375	0.0113686	0.0950819	0.947478	0.110356	-0.0778352	0.957204
1676	A0A286ZQW0	EPRS1	Glutamyl-prolyl-tRNA synthetase 1 OS=Sus scrofa OX=9823 GN=EPRS1 PE=1 SV=1	1.122	1.06	1.072	0.972	1.055	0.987	1.077	1.06	0.811	1.034	0.912	0.95	1.037	0.956	0.937	0.949	0.947	0.901	1.028	0.908	1.028	1.063	1.264	0.912	1.079	0.968	0.986	9	9	9	0.997835	0.963048	-0.00312746	0.0163522	0.933629	0.110393	-0.0990783	0.957059
353	A0A287BEA5	DDX17	RNA helicase OS=Sus scrofa OX=9823 GN=DDX17 PE=1 SV=1	1.059	1.088	1.028	1.007	1.019	0.959	0.992	1.055	0.978	1.056	0.899	0.955	0.891	0.865	0.981	0.891	0.855	0.809	1.016	0.996	0.972	0.927	1.036	1.068	0.965	0.975	0.795	9	9	9	1.04971	0.12813	0.0699967	0.892349	0.937371	0.110875	-0.0933073	0.955167
620	A0A4X1VTU2	GALE	UDP-glucose 4-epimerase OS=Sus scrofa OX=9823 GN=GALE PE=1 SV=1	0.999	1.099	0.994	0.886	0.998	0.933	0.986	1.031	1.036	1.025	0.973	1.11	1	0.872	0.832	1.099	0.972	0.9	1.061	0.939	1.081	1.074	1.337	1.164	1.126	0.952	0.892	9	9	9	0.93102	0.163327	-0.103116	0.786943	0.912425	0.111405	-0.132223	0.953094
1306	P19133	FTL	Ferritin light chain (Fragment) OS=Sus scrofa OX=9823 GN=FTL PE=1 SV=1	1.195	1.029	1	1.115	0.85	0.898	1.022	1.21	1.18	1.031	0.952	1.081	0.875	0.872	0.98	1.113	1.003	1.066	1.189	0.95	1.262	1.086	1.073	0.975	1.191	0.987	0.983	9	9	9	0.979682	0.708297	-0.0296141	0.149785	0.925433	0.111757	-0.111799	0.951725
829	F1SA04	AKAP8	A-kinase anchoring protein 8 OS=Sus scrofa OX=9823 GN=AKAP8 PE=3 SV=4	1.102	0.991	1.064	1.1	1.07	0.834	1.061	1.135	1.269	1.072	0.912	1.075	1.278	0.918	0.942	0.988	1.002	0.883	1.056	1.036	1.128	0.905	1.295	1.15	1.007	1.097	1.279	9	9	9	0.967146	0.532593	-0.048195	0.273605	0.911283	0.111992	-0.134029	0.950813
2747	A0A5G2QBR5	GGA2	Golgi associated, gamma adaptin ear containing, ARF binding protein 2 OS=Sus scrofa OX=9823 GN=GGA2 PE=3 SV=2	1.096	0.855	0.838	1.102	1.012	1.026	0.875	0.867	0.911	1.172	1.099	1.013	0.895	0.997	1.068	1.018	0.982	0.878	1.053	1.03	0.924	0.902	0.884	1.008	0.911	0.933	0.907	9	9	9	1.00351	0.936407	0.00505205	0.0285355	1.06665	0.112053	0.0930883	0.950575
442	F1RQZ9	EFTUD2	116 kDa U5 small nuclear ribonucleoprotein component OS=Sus scrofa OX=9823 GN=EFTUD2 PE=1 SV=2	1.159	1.085	1.072	1.092	0.93	1.095	1.105	1.075	1.129	1.055	0.904	0.962	0.91	0.902	0.982	0.973	1.027	1.105	0.895	1.089	1.044	1.108	1.119	0.882	1.106	1.087	1.076	9	9	9	1.03572	0.331036	0.0506367	0.480124	0.937699	0.112519	-0.0928027	0.948773
2909	P12309	GLRX	Glutaredoxin-1 OS=Sus scrofa OX=9823 GN=GLRX PE=1 SV=2	1.17	1.072	1.068	1.068	1.059	1.208	1.122	0.989	0.865	1.168	1.057	1.109	1.164	1.246	1.012	1.128	1.146	1.064	0.968	0.963	1.14	1.08	1.232	0.794	1.073	1.161	0.843	9	9	9	1.03966	0.503362	0.0561098	0.298119	1.09077	0.113072	0.125349	0.946646
3075	A0A4X1VYM7	THRAP3	Thyroid hormone receptor-associated protein 3 OS=Sus scrofa OX=9823 GN=THRAP3 PE=1 SV=1	1.159	1.231	1.178	0.937	1.022	0.966	1.069	1.09	1.106	1.07	1.018	1.013	0.97	0.929	1.015	0.951	0.993	0.959	1.038	1.022	1.073	1.049	1.08	0.938	1.025	0.947	1.11	9	9	9	1.05128	0.185033	0.0721498	0.732751	0.960784	0.113153	-0.0577155	0.946336
1663	Q95342	RPL18	Large ribosomal subunit protein eL18 OS=Sus scrofa OX=9823 GN=RPL18 PE=1 SV=4	1.035	1.055	1.092	1.149	0.993	1.086	1.114	1.122	1.106	0.991	0.909	0.945	0.971	1.001	1.013	0.976	1.045	0.98	1.013	1.013	0.985	1.084	1.106	0.897	1.009	1.044	1.045	9	9	9	1.06046	0.0298378	0.0846917	1.52523	0.960309	0.113653	-0.0584297	0.94442
1832	F1RSJ7	DDX42	RNA helicase OS=Sus scrofa OX=9823 GN=DDX42 PE=1 SV=4	0.977	0.941	0.87	1.02	0.936	0.986	1.014	1.039	1.089	0.964	0.966	1.012	0.841	0.931	0.968	0.948	0.952	0.958	0.908	0.942	1.012	0.881	1.003	1.047	1.01	1.098	1.09	9	9	9	0.986765	0.696205	-0.0192222	0.157263	0.949839	0.113932	-0.0742455	0.943356
1682	A0A4X1TYR3	RPS27L	40S ribosomal protein S27 OS=Sus scrofa OX=9823 GN=RPS27L PE=1 SV=1	0.915	0.522	0.896	1.167	1.018	0.699	1.047	0.928	0.834	0.872	0.494	0.81	1.262	0.745	1.005	1.08	0.981	0.998	0.963	1.042	0.868	0.939	1.308	1.205	1.039	0.986	1.245	9	9	9	0.836477	0.049124	-0.257602	1.30871	0.85951	0.114014	-0.218413	0.943043
1197	F1S415	BAG3	BAG cochaperone 3 OS=Sus scrofa OX=9823 GN=BAG3 PE=1 SV=3	1.291	1.165	1.164	1.096	0.914	1.017	1.103	1.095	1.02	1.195	1.159	1.209	0.919	1.119	1.115	0.961	1.037	1.09	0.987	1.065	1.19	0.865	0.826	1.101	0.887	1.057	1.038	9	9	9	1.09417	0.0995333	0.129832	1.00203	1.0874	0.114029	0.120883	0.942984
252	A0A8W4F6F0	PC	Pyruvate carboxylase OS=Sus scrofa OX=9823 GN=PC PE=1 SV=1	1.061	0.855	0.874	1.012	0.875	1.024	0.996	0.978	0.918	1.068	0.955	0.887	0.882	0.955	0.979	1.046	1.013	0.831	1.062	1.202	1.064	0.891	0.945	1.199	0.908	0.936	1.483	9	9	9	0.886791	0.106192	-0.173335	0.973909	0.889164	0.114294	-0.169478	0.941977
2155	I3LKS4	LOC641352	Caspase-14 OS=Sus scrofa OX=9823 GN=LOC641352 PE=1 SV=3	1.145	1.058	0.988	1.071	1.021	1.122	1.12	1.056	1.121	1.066	0.852	0.935	0.945	0.937	0.938	0.959	0.997	0.958	0.943	0.997	1.072	1.04	1.159	0.96	1.016	1.104	0.848	9	9	9	1.0616	0.10301	0.0862459	0.98712	0.9396	0.114301	-0.0898821	0.941949
101	I3L7P7	ATOX1	Copper transport protein ATOX1 OS=Sus scrofa OX=9823 GN=ATOX1 PE=1 SV=2	1.187	1.076	1.281	1.11	1.238	1.272	1.167	1.134	1.138	1.136	0.967	1.19	1.157	1.326	1.184	1.103	1.127	1.179	1.196	1.01	1.051	1.176	1.062	0.963	1.018	1.055	1.196	9	9	9	1.09006	0.0203575	0.124406	1.69127	1.066	0.11447	0.0922099	0.941309
2585	F1RTB0	ARMC1	Armadillo repeat-containing protein 1 OS=Sus scrofa OX=9823 GN=ARMC1 PE=1 SV=3	0.946	1.094	0.886	1.07	0.908	0.791	1.057	1.154	1.001	0.97	0.879	0.925	0.889	0.812	0.891	0.747	0.91	0.854	1.133	1.045	0.877	0.803	0.831	1.074	0.821	0.943	1.349	9	9	9	1.00349	0.962419	0.00502993	0.0166358	0.887449	0.114575	-0.172263	0.940911
1111	A0A286ZX74	SRSF5	Serine and arginine rich splicing factor 5 OS=Sus scrofa OX=9823 GN=SRSF5 PE=1 SV=2	0.895	1.081	1.079	1.028	0.95	0.865	0.981	0.859	0.854	0.97	1.004	0.989	0.998	0.815	0.847	0.987	0.988	0.868	1.104	1	1.082	0.802	1.028	0.997	1.117	0.922	1.036	9	9	9	0.945423	0.239017	-0.0809688	0.621571	0.931558	0.114629	-0.102282	0.940706
39	A0A8X9AEU4	TCIRG1	V-type proton ATPase subunit a OS=Sus scrofa OX=9823 GN=TCIRG1 PE=1 SV=1	1.06	1.201	1.111	1.116	1.03	1.023	1.083	1.164	1.183	1.042	0.905	0.912	0.993	1.109	1.102	1.1	1.106	1.072	1.04	1.031	0.969	1.006	0.964	0.911	1.018	1.027	0.859	9	9	9	1.12986	0.000589697	0.176142	3.22937	1.05847	0.115547	0.0819807	0.937241
4	F1SJE6	PGM5	Phosphoglucomutase 5 OS=Sus scrofa OX=9823 GN=PGM5 PE=1 SV=3	0.798	0.937	1.077	0.889	1.026	1.204	1.007	1.033	0.943	0.868	0.978	0.839	1.044	1.185	1.04	0.981	1.058	0.981	0.913	1.157	0.851	0.746	0.692	0.811	1.049	0.857	0.99	9	9	9	1.10513	0.154366	0.14422	0.811448	1.11257	0.115607	0.153898	0.937015
1316	A0A287B967	ASTN2	Astrotactin 2 OS=Sus scrofa OX=9823 GN=ASTN2 PE=4 SV=1	1.002	1.191	1.279	1.058	1.174	1.016	0.943	1.344	1.098	0.99	0.982	1.178	1.055	0.897	0.913	0.721	0.833	1.128	1.076	1.053	1.241	0.923	1.109	1.088	0.964	1.02	1.081	9	9	9	1.05756	0.276715	0.0807415	0.557967	0.910204	0.115626	-0.135738	0.936944
946	F1REX8	HIP1R	Huntingtin interacting protein 1 related OS=Sus scrofa OX=9823 GN=HIP1R PE=1 SV=3	1.089	0.974	1.013	1.133	0.995	1.012	1.102	1.062	1.173	1.015	0.821	0.92	0.971	0.858	0.939	1.017	0.977	0.963	1.021	0.994	0.925	0.903	1.085	1.164	0.872	1.036	1.453	9	9	9	1.01058	0.863605	0.0151816	0.0636849	0.897175	0.116312	-0.156538	0.934377
231	P62197	PSMC5	26S proteasome regulatory subunit 8 OS=Sus scrofa OX=9823 GN=PSMC5 PE=2 SV=1	1.116	0.99	1.073	0.861	0.966	0.973	1.14	1.056	1.151	0.918	0.915	1.014	1.038	0.866	0.977	0.939	0.91	1.032	1.031	0.963	1.063	0.939	1.234	1.069	1.018	1.004	0.879	9	9	9	1.0137	0.765935	0.0196246	0.115808	0.935761	0.116377	-0.0957882	0.934134
773	F6Q194	FGL2	Fibrinogen like 2 OS=Sus scrofa OX=9823 GN=FGL2 PE=1 SV=1	0.952	1.018	1.027	1.14	1.014	0.959	1.172	1.183	1.19	1.04	0.884	0.925	1.013	1.066	1.06	1.107	1.174	1.174	0.886	0.954	1.011	0.899	0.882	1.17	1.005	1.028	0.934	9	9	9	1.10104	0.0426923	0.138864	1.36965	1.07686	0.116453	0.106833	0.93385
1799	F1SUP1	AKR7A2	Aflatoxin B1 aldehyde reductase member 4 OS=Sus scrofa OX=9823 GN=AKR7A2 PE=1 SV=2	1.099	0.951	0.897	0.814	1.055	0.623	0.955	0.985	1.029	1.052	1.105	1.019	0.968	0.658	0.795	0.832	0.877	0.924	1.248	1.051	1.183	0.769	0.935	1.173	0.924	0.935	1.046	9	9	9	0.907599	0.195179	-0.139873	0.709568	0.888385	0.117504	-0.170743	0.929946
2731	A0A5G2QMP7	EIF4A1	Eukaryotic initiation factor 4A-I OS=Sus scrofa OX=9823 GN=EIF4A1 PE=1 SV=2	1.075	1.042	1.099	1.001	0.957	1.043	1.027	0.968	1.034	1.076	0.973	1.01	0.969	0.93	1.017	1.069	1.002	0.978	0.929	0.981	0.987	0.914	1.016	0.881	1.005	1.048	0.875	9	9	9	1.07063	0.0189545	0.0984661	1.72229	1.04493	0.117679	0.0634038	0.929301
943	A0A8W4F8A7	ARF1	ADP-ribosylation factor 1 OS=Sus scrofa OX=9823 GN=ARF1 PE=1 SV=1	1.071	0.969	0.898	1.012	0.766	0.768	1.036	0.979	0.959	0.838	1.027	1.077	0.836	0.836	0.987	1.017	0.973	0.849	1.144	0.984	1.081	1.117	0.937	0.856	0.92	0.997	1.095	9	9	9	0.926295	0.149416	-0.110456	0.825602	0.924324	0.117805	-0.11353	0.928838
479	F1S5K0	PPM1B	protein-serine/threonine phosphatase OS=Sus scrofa OX=9823 GN=PPM1B PE=1 SV=5	1.05	1.023	0.926	0.966	0.979	1.04	1.099	1.006	1.065	1.071	0.817	0.957	1.155	0.977	1.102	0.949	1.029	0.962	1.195	1.029	1.031	0.961	1.071	1.089	1.016	1.117	1.118	9	9	9	0.950867	0.0925125	-0.072684	1.0338	0.936844	0.117963	-0.0941188	0.928253
2097	A0A5G2QTK2	ZNF593	Zinc finger protein 593 OS=Sus scrofa OX=9823 GN=ZNF593 PE=3 SV=2	0.925	1.082	0.941	1.333	1.225	0.849	1.131	1.189	1.242	0.987	1.06	0.928	1.045	0.765	0.902	0.792	0.913	0.921	1.099	0.807	0.9	1.127	1.077	1.218	0.896	0.891	1.5	9	9	9	1.04225	0.628283	0.0597001	0.201845	0.873673	0.118578	-0.194834	0.925998
2018	Q684M4	KEAP1	Kelch-like ECH-associated protein 1 OS=Sus scrofa OX=9823 GN=KEAP1 PE=3 SV=1	0.936	0.874	0.863	1.183	1.253	1.107	0.928	1.088	1.083	1.018	0.887	0.905	1.117	0.898	1.09	0.951	0.917	0.861	1.015	1.129	0.963	1.062	1.291	1.082	0.931	0.903	1.012	9	9	9	0.992224	0.895853	-0.0112621	0.0477631	0.92075	0.118726	-0.119119	0.925452
1070	F1SPB0	POGLUT1	Protein O-glucosyltransferase 1 OS=Sus scrofa OX=9823 GN=POGLUT1 PE=1 SV=2	0.985	0.971	1.071	1.084	1.075	0.857	0.982	0.88	1.197	1.083	0.87	0.919	1.025	0.936	0.852	0.962	0.974	0.782	0.915	0.977	1.064	0.958	0.957	0.978	0.963	1.039	1.095	9	9	9	1.01744	0.677341	0.0249408	0.169192	0.939302	0.118757	-0.0903383	0.925342
147	A0A480I0Y2	MYL6	Myosin light chain 6 OS=Sus scrofa OX=9823 GN=MYL6 PE=1 SV=1	0.844	0.893	1.041	0.897	0.987	1.17	1.045	0.853	0.841	0.87	0.932	0.882	0.954	1.254	1.088	1.039	1.113	1.048	0.896	1.124	0.867	0.888	0.635	0.712	1.176	0.935	0.897	9	9	9	1.05424	0.487479	0.0762082	0.312044	1.12915	0.118968	0.175239	0.924572
454	A0A5G2QGZ8	BSG	Basigin OS=Sus scrofa OX=9823 GN=BSG PE=1 SV=2	0.907	0.929	0.933	1.062	1.076	1.14	0.916	0.881	0.866	0.947	0.933	0.924	1.089	1.203	1.245	0.883	0.995	0.908	0.981	0.983	0.923	0.914	0.97	0.92	0.978	0.87	0.865	9	9	9	1.03641	0.367745	0.0515966	0.434453	1.08603	0.119437	0.119065	0.92286
1509	A0A8W4FCM1	PLXNB2	Plexin B2 OS=Sus scrofa OX=9823 GN=PLXNB2 PE=3 SV=1	0.857	0.849	0.842	0.962	0.992	1.009	1.056	1.232	1.087	0.739	0.762	0.842	0.952	0.959	0.983	0.833	0.925	0.958	0.895	1.05	0.852	0.884	0.945	1.195	0.941	0.83	1.34	9	9	9	0.99485	0.944135	-0.00744911	0.0249658	0.890394	0.120013	-0.167484	0.920771
17	A0A287AUH9	SYNPO2	Synaptopodin 2 OS=Sus scrofa OX=9823 GN=SYNPO2 PE=1 SV=1	0.815	0.965	1.126	0.931	1.041	1.131	1.026	1.056	1.007	0.943	1.005	0.986	0.991	1.07	1.021	0.96	1.065	1.053	0.983	1.167	0.89	0.854	0.726	0.779	1.083	0.93	0.935	9	9	9	1.08997	0.162911	0.124292	0.788049	1.08949	0.120022	0.123657	0.920739
219	A0A287AI58	SLC4A2	Anion exchange protein OS=Sus scrofa OX=9823 GN=SLC4A2 PE=3 SV=1	0.997	1.276	1.16	1.183	1.112	0.929	1.228	1.208	1.351	0.935	0.816	1.028	0.95	0.821	0.953	1.06	1.031	1.066	1.165	1.024	1.016	0.869	1.112	1.028	0.948	1.092	1.042	9	9	9	1.12349	0.0302616	0.167992	1.51911	0.931583	0.120298	-0.102243	0.919742
1524	A0A4X1SFI9	BUB3	Mitotic checkpoint protein BUB3 OS=Sus scrofa OX=9823 GN=BUB3 PE=1 SV=1	0.982	1.022	1.059	1.194	1.143	1.063	0.993	0.982	1.033	1.045	0.868	0.955	0.981	0.9	0.982	0.955	0.927	0.906	0.963	0.956	0.97	0.947	1.172	1.111	0.949	0.97	0.966	9	9	9	1.05187	0.176264	0.0729507	0.753835	0.946135	0.120313	-0.079882	0.919687
528	A0A287B5W2	LOC100302368	Trypsinogen isoform X1 OS=Sus scrofa OX=9823 GN=LOC100302368 PE=4 SV=1	1.071	1.004	0.85	1.109	0.887	0.685	0.79	0.725	0.746	1.102	1.162	0.917	1.026	0.824	0.809	0.814	0.866	0.801	1.286	1.078	1.208	1.269	1.159	1.082	0.646	0.837	2.467	9	9	9	0.713107	0.0776096	-0.487809	1.11008	0.75426	0.120756	-0.406866	0.918092
81	A0A287AUE4	UBE2K	E2 ubiquitin-conjugating enzyme OS=Sus scrofa OX=9823 GN=UBE2K PE=1 SV=2	1.024	1.022	1.03	1.175	1.163	1.211	1.023	0.889	0.962	0.995	1.077	0.933	1.074	1.251	1.147	1.063	1.036	0.979	1.018	1.106	1.011	1.014	0.953	1.034	0.96	0.983	0.937	9	9	9	1.05357	0.19842	0.0752881	0.702415	1.05978	0.121005	0.0837684	0.917195
670	A0A286ZX08	CLIP2	CAP-Gly domain containing linker protein 2 OS=Sus scrofa OX=9823 GN=CLIP2 PE=1 SV=2	1.109	0.904	1.227	0.906	0.933	1.029	1.183	1.24	1.262	1.286	0.981	1.082	1.102	0.988	0.987	1.145	1.062	1.16	1.037	0.929	0.96	0.839	0.89	1.046	1.07	1.163	1.13	9	9	9	1.08043	0.208266	0.111603	0.681381	1.08043	0.121277	0.111603	0.916221
692	Q6RVA9	CAV1	Caveolin-1 OS=Sus scrofa OX=9823 GN=CAV1 PE=2 SV=1	0.899	0.911	0.918	1.103	1.082	0.808	0.928	0.867	0.801	0.861	0.909	0.932	1.136	0.973	1.011	0.921	0.853	0.805	0.868	0.954	1	1.107	0.867	1.104	1.311	1.05	0.978	9	9	9	0.900206	0.0979158	-0.151673	1.00915	0.909298	0.121349	-0.137176	0.915963
225	A0A287B3Q7	MOV10	RNA helicase OS=Sus scrofa OX=9823 GN=MOV10 PE=1 SV=2	1.132	1.043	0.931	1.072	0.961	0.903	1.008	0.951	0.95	1.051	0.947	1	1.015	0.913	1.028	0.883	0.983	0.92	1.004	0.994	1.055	1.063	1.089	1.144	0.956	0.93	0.956	9	9	9	0.973887	0.449733	-0.038173	0.347045	0.95093	0.121439	-0.0725886	0.915641
1383	I3L5I4	SMCHD1	Structural maintenance of chromosomes flexible hinge domain containing 1 OS=Sus scrofa OX=9823 GN=SMCHD1 PE=1 SV=2	1.067	1.078	0.987	1.022	1.007	1.041	1.025	1.081	1.163	1.026	0.793	0.957	0.999	0.951	0.938	0.952	0.968	0.87	1.047	1.024	0.973	0.856	1.021	1.102	0.962	1.052	0.92	9	9	9	1.05739	0.0828168	0.0805012	1.08188	0.943843	0.121756	-0.0833815	0.91451
1911	R4JU57	LSM14A	LSm14A OS=Sus scrofa OX=9823 GN=LSM14A PE=2 SV=1	0.981	1.022	1.048	1.18	1.043	1.063	0.954	1.138	0.999	0.919	0.831	0.972	0.99	0.976	0.98	0.885	0.885	0.926	1.004	0.946	1.036	0.948	0.891	1.342	0.866	0.955	1.238	9	9	9	1.02189	0.709843	0.0312465	0.148837	0.906568	0.122034	-0.141512	0.913519
69	A0A287AC51	HS2ST1	Heparan sulfate 2-O-sulfotransferase 1 OS=Sus scrofa OX=9823 GN=HS2ST1 PE=3 SV=1	1.088	0.932	1.099	1.096	1.023	0.928	1.032	0.972	1.079	0.979	0.953	0.976	1.115	0.855	1.152	1.075	0.956	0.909	0.996	0.952	1.084	1.128	1.209	1.213	1.033	0.934	1.114	9	9	9	0.957156	0.283834	-0.0631738	0.546935	0.928283	0.122742	-0.107363	0.911008
88	A0A287A9M0	MYLK	Myosin light chain kinase, smooth muscle OS=Sus scrofa OX=9823 GN=MYLK PE=1 SV=2	0.791	0.916	1.089	0.908	1.062	1.115	1.022	0.982	0.922	0.86	1.03	0.873	1.028	1.228	1.095	0.958	1.054	0.973	0.886	1.13	0.933	0.889	0.595	0.756	1.078	0.89	0.978	9	9	9	1.08261	0.261521	0.114508	0.582494	1.1185	0.123462	0.161566	0.908465
641	F1RP13	GGACT	Gamma-glutamylaminecyclotransferase OS=Sus scrofa OX=9823 GN=GGACT PE=1 SV=4	0.989	1.044	1.204	1.006	0.861	0.68	1.375	1.506	1.453	0.982	1.059	0.99	0.93	0.621	0.978	1.175	0.982	0.988	1.174	1.036	1.053	0.748	1.048	1.618	1.117	1.051	2.317	9	9	9	0.906468	0.531143	-0.141671	0.274789	0.779878	0.123938	-0.358679	0.906795
619	A0A5G2QET9	POLD1	DNA polymerase OS=Sus scrofa OX=9823 GN=POLD1 PE=3 SV=1	1.022	1.004	1.054	1.14	1.019	1.173	1.066	0.934	1.09	1.06	0.9	0.963	0.923	0.975	1.049	0.841	1.042	0.872	1.049	1.082	0.925	0.935	1.28	1.263	0.854	1.006	1.052	9	9	9	1.00593	0.91035	0.00852767	0.0407916	0.913085	0.12397	-0.131179	0.906682
41	F1RT57	PPP1R9B	Protein phosphatase 1 regulatory subunit 9B OS=Sus scrofa OX=9823 GN=PPP1R9B PE=1 SV=3	1.082	1.048	1.04	1.096	0.964	0.813	1.029	0.831	0.684	1.084	1.024	1.002	1.032	0.63	0.856	0.907	0.993	0.883	0.967	0.997	1.021	0.903	1.177	1.184	0.848	0.984	1.385	9	9	9	0.907141	0.203522	-0.140601	0.691388	0.888548	0.124004	-0.170478	0.906563
973	A0A287BKY7	SMARCD1	SWI/SNF related, matrix associated, actin dependent regulator of chromatin, subfamily d, member 1 OS=Sus scrofa OX=9823 GN=SMARCD1 PE=1 SV=2	1.181	0.9	1.079	1.082	0.986	1.04	1.09	1.147	1.155	1.149	0.862	1.072	1.066	0.906	0.852	0.995	1.17	0.949	1.119	1.173	0.95	0.977	1.183	1.175	0.955	1.032	1.269	9	9	9	0.982406	0.700008	-0.0256085	0.154897	0.917421	0.124169	-0.124344	0.905988
205	A0A4X1UHY1	EHHADH	Peroxisomal bifunctional enzyme OS=Sus scrofa OX=9823 GN=EHHADH PE=1 SV=1	0.989	1.086	1.039	1	0.981	0.969	0.998	0.864	0.947	1.074	0.97	0.913	1.063	1.034	0.945	0.953	0.947	0.865	1.02	1.106	1.054	0.969	1.074	1.181	0.933	0.878	1.148	9	9	9	0.947666	0.187112	-0.0775489	0.727898	0.936025	0.124197	-0.0953814	0.90589
103	A0A5G2QQG7	SWAP70	Switching B cell complex subunit SWAP70 OS=Sus scrofa OX=9823 GN=SWAP70 PE=1 SV=1	1.07	1.055	1.062	1.064	1.003	0.917	1.145	0.97	0.822	1.066	0.917	1.042	1.047	0.846	0.974	0.897	1.014	0.919	1.016	1.041	1.004	1.009	1.191	0.948	0.941	1.019	1.075	9	9	9	0.985288	0.715489	-0.021383	0.145397	0.943531	0.125134	-0.0838583	0.902625
645	A0A286ZJ74	TPR	Nucleoprotein TPR OS=Sus scrofa OX=9823 GN=TPR PE=1 SV=1	0.996	0.989	1.039	1.099	1.111	1.082	1.045	0.988	1.081	1.069	0.938	0.968	1.058	0.965	1.034	0.991	0.976	0.976	1.062	1.071	0.996	0.94	1.083	1.092	0.963	1.015	1.189	9	9	9	1.00202	0.94505	0.00290974	0.0245454	0.953671	0.125166	-0.0684361	0.902515
100	F1RW03	MRPL38	Large ribosomal subunit protein mL38 OS=Sus scrofa OX=9823 GN=MRPL38 PE=1 SV=1	0.941	0.934	0.936	0.974	0.862	0.893	1.014	0.974	1.056	0.941	0.698	0.825	0.868	0.873	0.888	0.929	0.961	0.911	0.955	0.94	0.843	0.763	0.976	1.07	0.891	0.99	1.131	9	9	9	1.00292	0.948409	0.00420783	0.0230042	0.922304	0.126475	-0.116686	0.897997
67	A5A769	BLOC1S3	Biogenesis of lysosome-related organelles complex 1 subunit 3 OS=Sus scrofa OX=9823 GN=BLOC1S3 PE=2 SV=1	1.02	0.991	1.079	1.19	1.062	1.345	1.164	1.365	1.405	0.985	0.909	0.926	0.976	1.275	1.147	0.943	1.172	1.103	0.971	1.012	0.928	0.935	1.036	1.016	1.017	0.974	0.838	9	9	9	1.21703	0.00361186	0.283362	2.44227	1.08124	0.126866	0.11269	0.896654
1960	I3L704	CIAPIN1	Anamorsin OS=Sus scrofa OX=9823 GN=CIAPIN1 PE=1 SV=2	0.911	0.913	0.965	1.03	1.058	0.985	0.982	0.927	0.917	0.872	0.937	0.926	1.01	0.827	0.916	1.068	0.992	0.944	0.987	1.016	0.906	0.896	1.08	0.93	0.992	1.075	1.205	9	9	9	0.956091	0.259281	-0.06478	0.58623	0.934522	0.127111	-0.0976997	0.895817
80	P41367	ACADM	Medium-chain specific acyl-CoA dehydrogenase, mitochondrial OS=Sus scrofa OX=9823 GN=ACADM PE=1 SV=3	0.999	0.943	1.115	1.043	1.068	1.169	0.995	1.21	1.084	0.999	0.918	0.985	0.925	1.072	1.029	0.958	1.02	1.015	0.939	0.906	0.972	0.976	1.016	1.002	0.958	0.895	0.945	9	9	9	1.11813	0.00418977	0.161091	2.37781	1.03624	0.127443	0.0513598	0.894684
2861	F1RMY9	MEPCE	RNA methyltransferase OS=Sus scrofa OX=9823 GN=MEPCE PE=1 SV=2	1.026	1.062	1.097	1.113	1.017	0.977	1.077	0.99	1.153	0.894	0.938	0.948	0.997	0.949	0.948	0.889	0.992	1.009	1.02	0.882	0.968	0.972	0.994	1.131	0.957	0.994	1.033	9	9	9	1.06267	0.05292	0.0876998	1.27638	0.956765	0.127447	-0.0637641	0.894671
630	A0A8W4FAC1	SCRIB	Scribble planar cell polarity protein OS=Sus scrofa OX=9823 GN=SCRIB PE=3 SV=1	0.923	0.953	0.896	0.986	0.957	1.051	1.004	0.962	1.102	1.022	0.978	0.949	0.957	0.984	1.057	1.007	0.934	0.825	0.969	1.057	0.986	1.002	0.995	1.062	0.978	0.958	1.111	9	9	9	0.968853	0.265591	-0.0456506	0.575786	0.955582	0.127609	-0.0655479	0.894119
2551	A0A287BFR0	RBM12B	RNA binding motif protein 12B OS=Sus scrofa OX=9823 GN=RBM12B PE=1 SV=2	1.013	1.265	1.206	1.187	1.136	0.796	0.976	1.242	1.199	0.892	0.907	1.097	1.024	0.854	0.966	0.879	0.901	0.956	1.071	0.905	1.039	0.872	1.117	1.316	0.855	0.939	1.32	9	9	9	1.06212	0.418824	0.086941	0.377969	0.898452	0.12764	-0.154486	0.894013
804	F1SRC8	CLEC3B	C-type lectin domain family 3 member B OS=Sus scrofa OX=9823 GN=CLEC3B PE=1 SV=1	0.898	1.152	1.018	1.116	1.237	0.685	0.943	1.001	1.121	0.791	0.962	1.024	1.106	0.928	0.953	1.275	0.997	1.137	0.97	0.95	1.025	0.81	1.433	1.374	1.186	1.311	1.465	9	9	9	0.871437	0.142306	-0.198532	0.846777	0.871627	0.1278	-0.198218	0.89347
929	A0A286ZSR0	SHMT1	Serine hydroxymethyltransferase OS=Sus scrofa OX=9823 GN=SHMT1 PE=1 SV=1	1.071	1.181	1.233	1.131	0.962	1.195	1.115	1.161	1.264	1.071	0.959	1.002	0.975	0.884	1.052	1.174	1.023	1.087	1.163	1.085	0.999	0.987	1.251	1.072	1.08	0.992	1.217	9	9	9	1.04743	0.260146	0.0668544	0.584784	0.937132	0.128655	-0.0936761	0.890572
2094	A0A287ALZ7	DNAJB5	DnaJ heat shock protein family (Hsp40) member B5 OS=Sus scrofa OX=9823 GN=DNAJB5 PE=4 SV=2	0.621	0.874	1.077	0.917	1.08	0.759	0.901	1.106	0.908	0.827	0.912	0.823	1.035	0.784	0.847	0.815	0.946	0.809	0.987	1.181	0.827	0.707	1.053	1.001	0.916	0.825	1.239	9	9	9	0.943567	0.494199	-0.0838034	0.306099	0.892628	0.128957	-0.163869	0.889555
716	F1SI77	CKMT1A	Creatine kinase U-type, mitochondrial OS=Sus scrofa OX=9823 GN=CKMT1A PE=1 SV=1	1.056	0.958	1.039	0.965	0.962	1.086	1.005	1.043	1.185	0.971	0.939	0.877	0.985	0.965	0.93	1.07	0.941	0.961	1.009	1.025	1.033	0.857	1.007	1.062	1.026	1.002	0.991	9	9	9	1.03185	0.32086	0.0452283	0.493685	0.958611	0.129532	-0.060983	0.887621
172	F1SL22	VWF	von Willebrand factor OS=Sus scrofa OX=9823 GN=VWF PE=1 SV=3	0.972	1.006	1.034	1.047	0.978	1.045	1.034	1.13	1.167	1.017	0.908	0.886	1.047	1.001	1.044	1.043	1.002	1.092	0.991	1.01	0.895	1.153	1.035	1.222	0.999	1.156	1.248	9	9	9	0.969513	0.482914	-0.0446681	0.31613	0.931095	0.129539	-0.103	0.887601
1535	A0A8W4FGT8	HNRNPH1 OS=Sus scrofa OX=9823 PE=1 SV=1	HNRNPH1 OS=Sus scrofa OX=9823 PE=1 SV=1	0.888	1.024	0.894	1.309	1.015	1.056	0.962	0.86	0.802	0.95	0.824	0.725	1.024	0.955	1.099	1.024	0.865	0.829	0.934	1.102	0.879	1.005	1.023	1.187	1.045	0.884	0.985	9	9	9	0.974126	0.671773	-0.037819	0.172778	0.917183	0.12969	-0.124719	0.887093
1003	I6L631	BCAS2	Pre-mRNA-splicing factor SPF27 OS=Sus scrofa OX=9823 GN=BCAS2 PE=1 SV=1	1.053	0.944	0.851	0.991	0.904	0.879	1.047	1.068	1.122	1.13	0.71	0.877	0.929	0.73	1.025	0.943	0.979	0.913	0.976	1.131	0.896	0.811	1	1.44	0.864	0.997	1.352	9	9	9	0.935777	0.409951	-0.0957635	0.387268	0.869969	0.130082	-0.200963	0.885782
1692	A0A287AL90	PARP2	Poly(ADP-ribose) polymerase 2 OS=Sus scrofa OX=9823 GN=PARP2 PE=3 SV=2	0.892	0.966	1.156	1.181	0.958	1.074	1.159	1.128	1.169	0.905	0.591	0.654	0.834	1.105	1.082	0.968	0.979	1.026	1.271	0.694	1.056	1.06	1.05	1.204	0.971	0.944	1.063	9	9	9	1.03973	0.541439	0.0562081	0.266451	0.874477	0.130297	-0.193508	0.885066
704	F1RW08	SRP68	Signal recognition particle subunit SRP68 OS=Sus scrofa OX=9823 GN=SRP68 PE=1 SV=4	1.053	0.999	1.008	0.837	0.989	0.879	1.012	0.963	0.96	1.042	0.937	1.059	0.837	0.817	0.868	1.003	1.01	0.943	1.041	1.071	1.04	0.955	1.044	0.925	0.956	0.93	1.078	9	9	9	0.962389	0.236805	-0.0553074	0.625609	0.942035	0.130318	-0.0861468	0.884995
3028	A0A140TAK4	MYD88	Myeloid differentiation primary response protein MyD88 OS=Sus scrofa OX=9823 GN=MYD88 PE=4 SV=3	0.9	1.27	1.201	1.065	1.011	0.577	1.005	1.658	1.25	0.858	1.029	1.125	0.806	0.476	0.675	0.654	0.796	1.049	1.028	0.999	0.998	0.953	0.987	0.994	0.897	0.61	1.663	9	9	9	1.08851	0.514924	0.122354	0.288257	0.818052	0.130999	-0.289735	0.882731
721	A0A287AES5	PCK2	phosphoenolpyruvate carboxykinase (GTP) OS=Sus scrofa OX=9823 GN=PCK2 PE=1 SV=1	1.049	1.015	1.002	1.022	0.98	0.922	0.903	0.924	0.813	0.949	0.964	1.011	0.984	1.015	1.018	0.982	0.945	0.876	1.001	1.008	1.001	0.923	1.047	1.074	0.971	0.981	1.043	9	9	9	0.953697	0.13338	-0.0683978	0.874909	0.966295	0.131521	-0.049465	0.881004
1149	A0A287BSU8	SRSF4	Serine and arginine rich splicing factor 4 OS=Sus scrofa OX=9823 GN=SRSF4 PE=1 SV=1	0.955	1.343	1.148	1.268	1.175	0.672	0.856	1.519	1.114	0.942	0.727	0.992	0.932	0.655	0.727	0.567	0.806	0.749	1.037	0.867	0.986	0.811	1.106	1.187	0.806	0.503	0.981	9	9	9	1.21318	0.092793	0.278796	1.03248	0.856712	0.132083	-0.223118	0.879152
1563	A0A287AHK1	GC	Vitamin D-binding protein OS=Sus scrofa OX=9823 GN=GC PE=1 SV=2	0.901	1.067	0.975	1.099	0.938	1.23	1.169	1.21	1.22	0.932	0.982	0.903	1.203	1.467	1.107	1.138	1.087	1.175	0.837	0.951	0.926	1.154	0.965	0.792	1.116	1.177	1.036	9	9	9	1.09549	0.146116	0.131574	0.835302	1.11615	0.132698	0.15853	0.877136
203	A0A8W4FCU2	MYH9	Myosin-9 OS=Sus scrofa OX=9823 GN=MYH9 PE=1 SV=1	1.083	1.007	0.971	0.981	1.05	0.918	0.95	1.027	1.045	1.03	0.942	1.058	1.018	0.998	0.985	0.998	0.951	0.986	0.973	0.974	1.02	0.975	0.895	0.89	1.008	1.012	0.927	9	9	9	1.04127	0.118314	0.058348	0.926963	1.03366	0.132752	0.0477671	0.87696
1347	P0DTA4	PCCA	Propionyl-CoA carboxylase alpha chain, mitochondrial OS=Sus scrofa OX=9823 GN=PCCA PE=1 SV=1	0.929	0.984	1.059	1.014	0.916	1.085	0.967	1.081	1.14	0.985	0.9	1.027	0.976	0.996	0.95	1.016	0.989	0.938	0.908	1.006	0.99	0.979	1.097	1.163	0.985	0.967	1.234	9	9	9	0.983492	0.699653	-0.0240143	0.155117	0.94083	0.133197	-0.0879945	0.875507
2846	K7GT57	DDX39B	Spliceosome RNA helicase DDX39B OS=Sus scrofa OX=9823 GN=DDX39B PE=1 SV=4	1.118	1.009	1.023	1.248	1.26	0.83	0.91	1.019	0.953	1.056	1.013	0.983	1.253	0.79	0.962	0.878	0.91	0.896	1.132	0.877	1.231	0.999	1.313	1.511	0.871	0.925	1.099	9	9	9	0.940952	0.464388	-0.087807	0.333119	0.877787	0.133315	-0.188058	0.875122
2619	A0A5G2RC05	NCLN	BOS complex subunit NCLN OS=Sus scrofa OX=9823 GN=NCLN PE=1 SV=1	0.995	0.914	0.92	1.041	1.001	0.961	1.013	1.101	1.161	1.006	0.833	0.912	0.918	0.94	0.97	1.034	1.034	0.997	0.99	0.969	1.008	0.902	1.1	1.117	0.969	0.965	1.098	9	9	9	0.998794	0.97381	-0.00174153	0.0115256	0.948015	0.133479	-0.0770183	0.874588
2044	K7GNC8	RBM10	RNA binding motif protein 10 OS=Sus scrofa OX=9823 GN=RBM10 PE=1 SV=3	0.993	1.193	1.223	1.049	1.139	0.906	1.018	0.954	0.972	0.843	0.885	1.035	0.903	0.978	0.845	0.995	0.989	0.913	0.979	0.863	1.007	0.898	1.245	0.98	0.945	0.993	1.131	9	9	9	1.04491	0.414518	0.0633739	0.382456	0.927552	0.13359	-0.1085	0.874225
1071	A0A286ZXA6	GADD45GIP1	Large ribosomal subunit protein mL64 OS=Sus scrofa OX=9823 GN=GADD45GIP1 PE=1 SV=1	0.974	0.924	0.81	0.918	0.992	1.322	0.896	1.199	1.018	0.929	0.891	0.913	1.051	1.211	1.353	0.955	0.993	0.895	0.913	1.035	0.994	0.801	0.752	1.069	0.937	0.922	0.854	9	9	9	1.09375	0.197068	0.129288	0.705385	1.11043	0.134195	0.151114	0.872265
262	A0A5G2QUR1	MIA3	MIA SH3 domain ER export factor 3 OS=Sus scrofa OX=9823 GN=MIA3 PE=1 SV=2	1.027	0.949	0.902	1.015	1.084	0.721	0.977	0.91	0.876	1.09	1.016	0.962	0.983	0.932	0.976	0.998	0.983	0.936	1.031	1.054	1.051	0.936	1.021	1.26	0.938	0.967	1.27	9	9	9	0.888014	0.046	-0.171345	1.33724	0.93157	0.13491	-0.102264	0.869956
20	A0A5G2QPS5	FARP1	FERM, ARHGEF and pleckstrin domain-containing protein 1 OS=Sus scrofa OX=9823 GN=FARP1 PE=1 SV=1	1.023	1.043	0.973	0.995	1.02	0.96	1.04	0.917	0.868	0.975	0.964	0.931	1.016	1.087	1.035	0.975	1.027	0.935	0.977	0.978	0.998	1.012	0.873	0.869	1.017	0.888	0.961	9	9	9	1.03103	0.307939	0.044083	0.511535	1.04339	0.135029	0.0612813	0.869573
162	Q8MJ49	OSTF1	Osteoclast-stimulating factor 1 OS=Sus scrofa OX=9823 GN=OSTF1 PE=2 SV=1	1.044	0.96	1.016	1.031	1.042	1.144	0.94	1.016	1.095	1.073	0.857	0.965	0.971	1.01	0.955	1.016	0.866	0.873	0.825	0.985	0.853	0.808	0.966	0.889	0.992	0.975	0.678	9	9	9	1.16522	0.00339599	0.220607	2.46903	1.07715	0.135909	0.107225	0.86675
373	F1RN87	GIT1	GIT ArfGAP 1 OS=Sus scrofa OX=9823 GN=GIT1 PE=4 SV=3	1.003	1.122	1.015	0.979	1.044	0.713	1.004	1.219	1.335	1.02	1.058	0.962	1.005	0.733	0.831	0.903	0.948	0.986	1.08	0.928	1.067	0.892	1.008	0.995	0.984	1.021	1.038	9	9	9	1.04671	0.461891	0.0658622	0.33546	0.937091	0.135999	-0.0937391	0.866465
1726	A0A287BKP9	VWA1	von Willebrand factor A domain-containing protein 1 OS=Sus scrofa OX=9823 GN=VWA1 PE=1 SV=1	0.899	1.021	0.941	1.42	1.552	0.659	0.964	0.998	0.809	0.927	1.035	0.97	0.99	0.597	0.649	0.972	1.044	0.987	1.024	1.04	0.978	0.619	1.292	1.877	0.927	0.895	1.484	9	9	9	0.913871	0.543322	-0.129937	0.264942	0.806137	0.136243	-0.310904	0.865686
784	A0A5G2R3H6	EIF3J	Eukaryotic translation initiation factor 3 subunit J OS=Sus scrofa OX=9823 GN=EIF3J PE=1 SV=1	1.058	1.067	0.998	0.9	0.999	0.943	1.079	0.905	0.983	1.105	1.09	1.129	1.097	1.033	0.977	0.994	1.049	0.987	1.019	1.053	1.064	0.934	0.883	0.937	1.129	1.065	0.85	9	9	9	0.999776	0.995507	-0.000323003	0.00195564	1.05899	0.136268	0.0826864	0.865606
2658	A0A287BQ72	TALDO1	Transaldolase OS=Sus scrofa OX=9823 GN=TALDO1 PE=1 SV=1	1.095	1.059	1.073	0.876	1.015	0.94	0.998	0.999	0.901	1.036	1.016	1.091	1.004	1.052	0.989	1.04	1.019	1.049	1.026	0.913	1.06	1.05	1.021	0.821	1.014	1.058	0.88	9	9	9	1.01278	0.750832	0.0183186	0.124457	1.05123	0.136352	0.0720742	0.865339
2351	F1RUE1	TDP2	Tyrosyl-DNA phosphodiesterase 2 OS=Sus scrofa OX=9823 GN=TDP2 PE=4 SV=4	1.183	1.134	1.096	1.274	1.243	1.496	1.062	1.182	1.219	1.025	1.02	1	1.09	1.128	1.085	0.959	0.897	1.071	1.281	0.977	1.154	1.2	1.391	1.44	0.932	0.963	0.956	9	9	9	1.0578	0.412712	0.0810678	0.384353	0.90101	0.136756	-0.150385	0.864055
1225	B8Y648	UBE2L3	Ubiquitin conjugating enzyme E2 L3 OS=Sus scrofa OX=9823 GN=UBE2L3 PE=1 SV=1	1.04	0.968	0.995	0.793	1.071	0.852	1.004	0.724	0.794	1.101	0.94	1.033	1.285	1.071	1.036	0.808	1.017	0.96	0.97	1.111	1.023	0.938	0.892	0.781	1.016	0.899	0.85	9	9	9	0.971816	0.627648	-0.0412449	0.202284	1.09092	0.137182	0.125545	0.862702
602	F1RJK5	GCN1	GCN1 activator of EIF2AK4 OS=Sus scrofa OX=9823 GN=GCN1 PE=1 SV=5	1.032	1.021	1.02	1.023	0.958	0.962	1.055	0.89	1.003	1.056	0.973	0.947	0.923	0.881	0.942	1.01	0.99	0.965	0.959	1.01	1.057	0.928	1.119	0.963	0.96	0.982	1.139	9	9	9	0.983218	0.583501	-0.0244165	0.233959	0.952835	0.137206	-0.0697011	0.862628
2048	A0A4X1VPT2	ELANE	Elastase, neutrophil expressed OS=Sus scrofa OX=9823 GN=ELANE PE=1 SV=1	1.015	1.003	0.72	2.005	0.977	1.105	0.938	1.071	1.083	1.086	0.925	1.204	1.058	1.127	1.296	1.366	1.477	0.855	0.767	1.181	0.847	1.005	1.12	1.372	0.951	0.826	1.015	9	9	9	1.0917	0.50663	0.126576	0.295309	1.14421	0.137465	0.194351	0.861806
115	A0A287AJ98	RRM2	Ribonucleoside-diphosphate reductase subunit M2 OS=Sus scrofa OX=9823 GN=RRM2 PE=1 SV=2	1.02	1.027	1.049	1.11	0.989	1.114	1.172	0.85	0.732	1.127	0.914	0.928	1.016	1.01	1.156	0.85	1.223	0.878	1.002	1.122	0.964	0.986	1.4	1.379	0.841	1.197	1.376	9	9	9	0.882731	0.130682	-0.179954	0.883785	0.88653	0.138392	-0.173759	0.858888
608	A0A287AMH6	CYB5R4	Cytochrome b5 reductase 4 OS=Sus scrofa OX=9823 GN=CYB5R4 PE=3 SV=2	1.082	0.902	1.182	0.866	0.911	0.939	1.24	1.472	1.231	1.113	1.075	1.049	1.051	1.035	0.967	0.91	1.159	1.188	1.069	1.2	1.092	0.782	0.866	0.993	1.131	0.686	0.739	9	9	9	1.14805	0.148333	0.199184	0.828761	1.11556	0.138401	0.157774	0.858861
99	A0A8W4FJC7	ZNF326	DBIRD complex subunit ZNF326 OS=Sus scrofa OX=9823 GN=ZNF326 PE=1 SV=1	1.028	0.928	0.963	0.967	1.063	0.813	1.177	0.807	0.821	1.045	1.002	1.001	1.07	0.848	0.893	1.258	1.199	1.142	1.015	1.051	1.101	1.179	1.279	1.118	1.089	1.098	1.318	9	9	9	0.835968	0.00339731	-0.25848	2.46887	0.922912	0.138936	-0.115735	0.857186
719	A0A287B0I4	ARL8B	ADP ribosylation factor like GTPase 8B OS=Sus scrofa OX=9823 GN=ARL8B PE=1 SV=3	1.09	1.07	0.969	0.952	1.098	1.02	1.11	0.836	0.869	1.021	0.956	1.054	1.04	1.066	0.979	1.079	1.013	1.08	0.988	1.036	1.058	0.947	0.994	0.907	1.05	1.037	0.949	9	9	9	1.00535	0.891252	0.00770295	0.0499996	1.03591	0.139299	0.0509035	0.856051
48	I3L9V2	VAT1	Synaptic vesicle membrane protein VAT-1 homolog OS=Sus scrofa OX=9823 GN=VAT1 PE=1 SV=1	0.985	0.959	1.217	1.196	0.997	1.141	1.027	0.998	1.014	1.013	0.924	1.122	1.046	1.16	1.145	1.073	0.955	1.067	0.936	1.001	0.904	1.147	0.946	0.935	1.05	1.106	0.921	9	9	9	1.06573	0.155658	0.0918389	0.807828	1.06249	0.139486	0.0874439	0.855469
823	A0A287AIV8	PKP4	Plakophilin 4 OS=Sus scrofa OX=9823 GN=PKP4 PE=3 SV=2	0.796	0.743	0.894	0.942	0.858	1.055	0.948	0.892	0.983	0.93	0.841	0.824	0.991	1.074	0.97	1.201	1.118	0.778	1.631	1.167	0.95	0.886	0.903	0.944	2.182	0.886	1.465	9	9	9	0.736426	0.0663626	-0.441387	1.17808	0.792355	0.139709	-0.335781	0.854776
1328	F1S827	SERBP1	Plasminogen activator inhibitor 1 RNA-binding protein isoform 1 OS=Sus scrofa OX=9823 GN=SERBP1 PE=1 SV=2	1.092	1.167	1.083	0.903	1.073	1.031	1.027	0.961	0.851	1.044	1.14	1.042	0.999	1.125	0.945	0.922	0.937	1.093	1.084	0.912	1.038	1.075	0.941	0.826	0.947	0.997	0.849	9	9	9	1.05987	0.222463	0.0838853	0.652743	1.06667	0.139998	0.0931198	0.853879
2802	A0A287APA5	EPB41L3	Erythrocyte membrane protein band 4.1 like 3 OS=Sus scrofa OX=9823 GN=EPB41L3 PE=1 SV=2	0.99	0.984	1.104	0.983	0.912	1.177	0.976	1.108	1.128	1.008	0.922	0.901	0.96	1.052	0.983	0.999	0.941	0.926	0.972	1.068	1.042	0.96	1.082	0.987	1.095	1.046	0.86	9	9	9	1.02744	0.487081	0.039049	0.312399	0.953907	0.140205	-0.0680796	0.853237
2652	A0A8D0P6A0	ELOC	Elongin-C OS=Sus scrofa OX=9823 GN=ELOC PE=1 SV=1	0.991	1.007	1.047	0.951	1.012	0.9	1.145	1.068	0.981	0.842	0.902	1.381	1.032	0.897	0.885	0.931	0.96	1.072	0.87	0.916	0.972	0.884	0.988	0.742	0.93	0.893	0.852	9	9	9	1.1311	0.00313533	0.177733	2.50372	1.10625	0.140271	0.145678	0.853033
497	A0A4X1W6C1	MON2	Protein MON2 homolog OS=Sus scrofa OX=9823 GN=MON2 PE=1 SV=1	1.081	1.043	1.165	1.524	1.22	0.874	1.142	1.083	1.194	1.075	1.055	0.945	1.026	0.713	1.287	1.043	1.069	1.004	0.969	1.015	1.05	1.13	1.66	1.244	0.911	1.087	1.659	9	9	9	0.962797	0.694539	-0.0546961	0.158304	0.859394	0.140546	-0.218608	0.852181
363	F1SH96	ITIH3	Inter-alpha-trypsin inhibitor heavy chain H3 OS=Sus scrofa OX=9823 GN=ITIH3 PE=1 SV=5	0.976	0.973	0.954	1.207	0.948	0.967	0.861	0.985	0.984	0.963	0.976	0.903	0.838	1.059	0.945	1.114	0.991	0.976	1.155	0.923	1.086	1.018	0.958	1.225	0.938	1.061	1.005	9	9	9	0.945138	0.229088	-0.0814028	0.639998	0.935532	0.140575	-0.096141	0.852092
1258	I3LI06	KIF2A	Kinesin-like protein OS=Sus scrofa OX=9823 GN=KIF2A PE=1 SV=2	1.005	0.961	0.899	0.918	0.888	0.93	0.974	1.06	1.151	1.097	0.913	0.954	0.904	0.851	0.905	0.867	1.08	0.852	1.058	1.097	1.004	0.894	1.065	1.005	0.901	1.035	0.92	9	9	9	0.978505	0.57972	-0.0313483	0.236782	0.938078	0.141166	-0.0922206	0.850269
394	A0A4X1V4G4	ARHGDIB	Rho GDP dissociation inhibitor beta OS=Sus scrofa OX=9823 GN=ARHGDIB PE=1 SV=1	1.024	1.203	1.098	1.097	1.152	1.027	0.993	1.005	1.009	0.883	1.013	1.191	1.062	1.056	0.956	0.841	1.008	0.961	0.952	0.757	1.062	0.754	0.816	0.891	1.082	0.977	0.941	9	9	9	1.16715	0.00631192	0.222993	2.19984	1.08977	0.141702	0.124026	0.848625
401	I3LQY9	UBXN7	UBX domain protein 7 OS=Sus scrofa OX=9823 GN=UBXN7 PE=1 SV=2	1.03	1.046	0.985	0.988	1.029	0.857	0.98	0.973	0.839	0.994	1.189	1.046	1.136	0.82	1.06	0.812	0.951	0.838	1.298	1.067	1.043	1.027	1.182	1.183	0.922	0.825	1.273	9	9	9	0.888697	0.0596172	-0.170237	1.22463	0.900815	0.141929	-0.150698	0.847929
2002	Q06AA0	SRSF6	SFRS6 OS=Sus scrofa OX=9823 GN=SRSF6 PE=1 SV=1	1.017	1.119	1.188	1.062	1.019	1.019	1.078	1.305	1.237	0.936	0.745	0.965	0.988	0.918	0.968	0.851	0.964	0.951	1.013	0.889	1.082	0.886	1.168	1.163	0.9	0.841	1.027	9	9	9	1.11986	0.0429182	0.163315	1.36736	0.923849	0.142105	-0.114271	0.84739
142	A0A286ZUN9	NDUFS8	NADH dehydrogenase [ubiquinone] iron-sulfur protein 8, mitochondrial OS=Sus scrofa OX=9823 GN=NDUFS8 PE=1 SV=3	1.017	1.489	1.218	1.17	1.385	0.688	1.046	1.09	1.113	0.862	1.097	1.031	0.968	0.53	0.735	0.967	0.931	0.98	1.114	0.974	0.979	0.824	0.959	1.106	1.005	0.997	1.055	9	9	9	1.13347	0.132243	0.180751	0.878629	0.898813	0.142181	-0.153907	0.847158
303	A0A8W4F753	SLA-3	MHC class I antigen 3 OS=Sus scrofa OX=9823 GN=SLA-3 PE=1 SV=1	1.112	0.912	0.955	0.978	0.841	0.813	1.222	1.076	0.794	1.084	0.888	0.958	0.774	1.167	0.824	1.029	0.994	0.952	0.765	0.918	0.974	0.85	0.916	0.782	0.977	0.789	0.988	9	9	9	1.09348	0.171274	0.128926	0.766308	1.08933	0.142387	0.123445	0.846529
170	A0A5G2QNV7	ISOC1	Isochorismatase domain-containing protein 1 OS=Sus scrofa OX=9823 GN=ISOC1 PE=1 SV=1	0.929	1.024	1.034	1.355	1.203	1.386	1.116	1.158	1.139	1.156	1.149	1.022	1.151	1.128	1.156	0.977	1.072	1.099	1.039	0.964	1.088	1.083	1.245	0.919	1.057	1.056	0.789	9	9	9	1.11948	0.0798648	0.162829	1.09764	1.07251	0.143274	0.100992	0.843833
883	A0A5S6G8U0	CUBN	Cubilin OS=Sus scrofa OX=9823 GN=CUBN PE=4 SV=1	1.002	0.942	0.914	0.836	0.667	0.731	1.011	1.01	1.199	1.062	0.701	0.809	1.01	0.688	0.772	0.92	0.861	0.75	0.929	0.902	1.068	0.805	0.782	1.435	0.868	0.87	1.028	9	9	9	0.956832	0.632942	-0.0636624	0.198636	0.871762	0.143653	-0.197993	0.842685
2234	F1S6B5	FMOD	Fibromodulin OS=Sus scrofa OX=9823 GN=FMOD PE=1 SV=3	0.866	0.903	0.939	1.154	1.031	0.894	0.981	1.053	1.044	1.011	1.223	0.814	0.99	1.095	1.14	1.456	0.955	1.061	1	0.897	0.955	1.07	0.973	0.949	1.028	1.004	0.964	9	9	9	1.00283	0.938713	0.00407426	0.0274673	1.10238	0.143876	0.140616	0.84201
1460	A0A5G2Q7I8	TWF2	Twinfilin actin binding protein 2 OS=Sus scrofa OX=9823 GN=TWF2 PE=1 SV=2	1.062	0.944	0.996	1.067	0.941	1.095	0.931	0.855	1.071	1.009	0.883	1.013	1.059	0.959	1.156	1.062	0.981	0.913	0.952	0.942	0.977	0.753	0.855	1.037	0.985	0.943	1.031	9	9	9	1.05746	0.200263	0.0806074	0.698399	1.06608	0.144699	0.0923112	0.839534
2422	F1S3C7	AP1G1	AP-1 complex subunit gamma OS=Sus scrofa OX=9823 GN=AP1G1 PE=1 SV=5	0.908	1.189	1.103	0.921	0.884	0.946	1.057	0.81	0.713	0.876	1.091	1.15	0.93	0.985	0.954	0.894	0.997	0.836	1.073	0.907	1.103	1.031	1.199	0.995	0.913	1.167	2.033	9	9	9	0.818635	0.120418	-0.288707	0.919307	0.8361	0.144913	-0.258252	0.838894
38	A0A287A4X0	IKZF1	DNA-binding protein Ikaros OS=Sus scrofa OX=9823 GN=IKZF1 PE=2 SV=2	1.156	1.009	1.006	0.981	0.93	0.788	1.114	0.759	0.764	1.058	0.748	1.069	0.973	0.798	0.937	0.857	1.067	0.983	0.977	0.926	1.044	0.913	1.147	1.253	0.86	0.992	1.227	9	9	9	0.910911	0.193549	-0.134618	0.713209	0.909091	0.145619	-0.137504	0.836783
255	A0A5S6GYA9	ARAF	non-specific serine/threonine protein kinase OS=Sus scrofa OX=9823 GN=ARAF PE=3 SV=1	1.041	1.075	1.091	1.13	1.003	1.191	1.081	0.916	0.924	1.016	0.882	0.883	0.948	1.069	1.015	1.076	1.161	1.036	1	1.082	0.95	0.926	1.146	1.062	1.494	1.039	1.439	9	9	9	0.932334	0.328346	-0.101082	0.483669	0.896232	0.145739	-0.158056	0.836425
562	A0A287BEJ4	VPS33B	Vacuolar protein sorting-associated protein 33B OS=Sus scrofa OX=9823 GN=VPS33B PE=3 SV=2	1.217	1.081	1.012	1.086	0.954	1.046	1.029	1.125	1.15	1.054	0.921	0.91	1.017	0.92	0.952	1.237	0.728	0.97	1.011	1.116	0.959	0.952	1.189	1.123	1.046	1.034	1.008	9	9	9	1.02776	0.446966	0.0395036	0.349726	0.922759	0.14694	-0.115974	0.83286
569	A0A4X1VEK1	RNF20	E3 ubiquitin protein ligase OS=Sus scrofa OX=9823 GN=RNF20 PE=1 SV=1	0.995	1.043	0.971	1.12	1.041	0.873	0.977	0.917	1.062	1.079	0.992	0.954	0.959	0.838	1.018	0.917	0.971	0.876	1.09	1.31	0.977	0.843	1.009	1.154	0.887	0.905	1.363	9	9	9	0.943489	0.389472	-0.0839221	0.409524	0.902076	0.147638	-0.148679	0.830801
799	A0A5G2QLT3	MRPL22	Large ribosomal subunit protein uL22m OS=Sus scrofa OX=9823 GN=MRPL22 PE=1 SV=1	1.068	1.044	0.997	1.028	1.055	0.819	1.177	1.012	1.07	1.032	1.043	1.009	1.193	0.986	1.065	0.69	0.85	0.91	1.059	1.057	1.062	0.949	0.916	1.313	1.355	0.817	1.8	9	9	9	0.89756	0.290032	-0.15592	0.537553	0.849923	0.147962	-0.234597	0.82985
739	F1SPH2	SUOX	sulfite oxidase OS=Sus scrofa OX=9823 GN=SUOX PE=1 SV=3	1.093	0.999	1.014	0.954	0.974	1.038	1.083	1.133	1.187	1.048	1.045	0.948	0.999	1.019	0.892	1.05	1.012	1.005	1.045	1.069	1.109	0.906	1.099	1.07	1.007	0.984	1.13	9	9	9	1.00595	0.860567	0.00855204	0.0652151	0.957426	0.148874	-0.0627664	0.827183
1	A0A287AZG0	ARHGAP1	Rho GTPase activating protein 1 OS=Sus scrofa OX=9823 GN=ARHGAP1 PE=1 SV=2	1.038	0.998	1.231	1.108	1.083	1.107	1.056	1.125	1.087	0.979	0.907	1.02	0.937	1.066	1.056	1.044	1.044	1.114	1	1.049	0.963	0.926	0.938	0.918	1.053	0.978	0.967	9	9	9	1.1184	0.000716261	0.16144	3.14493	1.04265	0.14959	0.0602583	0.825099
86	A0A287ACW7	FDX2	Ferredoxin-2, mitochondrial OS=Sus scrofa OX=9823 GN=FDX2 PE=1 SV=1	1.184	1.179	1.228	1.09	1.106	1.036	1.184	1.174	1.493	1.05	1.114	1.076	1.074	1.181	0.971	0.885	1.044	1.07	1.177	1.044	0.955	1.245	1.272	1.088	0.982	1.123	1.231	9	9	9	1.05506	0.301352	0.0773194	0.520927	0.935554	0.14995	-0.0961071	0.824054
2434	A0A287B7T2	GNPAT	Dihydroxyacetone phosphate acyltransferase OS=Sus scrofa OX=9823 GN=GNPAT PE=3 SV=1	1.07	1.26	0.889	1.008	1.028	0.943	0.998	1.342	1.328	1.01	1.061	1.131	0.949	0.958	0.975	0.979	1.101	1.113	1.407	1.217	1.042	0.939	1.069	1.111	0.943	1.053	1.309	9	9	9	0.9778	0.752964	-0.032389	0.123226	0.919425	0.150105	-0.121196	0.823604
1724	A0A480MVX6	SELENBP1	Methanethiol oxidase OS=Sus scrofa OX=9823 GN=SELENBP1 PE=1 SV=1	0.97	0.941	1.035	0.823	1.026	0.919	1.072	1.008	1.023	0.954	0.908	0.858	1.025	1.007	0.92	1.009	0.955	0.912	0.908	1.111	0.953	1.021	0.958	0.996	1	1.034	0.94	9	9	9	0.988342	0.72611	-0.0169176	0.138997	0.958189	0.150682	-0.0616185	0.82194
180	A0A286ZYT0	RALY	RALY heteroous nuclear ribonucleoprotein OS=Sus scrofa OX=9823 GN=RALY PE=1 SV=2	1.055	1.033	1.019	0.893	0.942	0.927	1.074	0.917	0.991	1	0.895	1.017	0.984	0.883	0.933	0.912	0.965	0.984	0.945	1.053	0.998	0.916	1.102	0.975	0.899	0.993	1.09	9	9	9	0.986624	0.688509	-0.0194283	0.162091	0.955635	0.150724	-0.0654687	0.821818
1806	A0A5G2RCA6	ILVBL	2-hydroxyacyl-CoA lyase 2 OS=Sus scrofa OX=9823 GN=ILVBL PE=1 SV=2	1.066	1.008	0.906	1.042	1.003	1.058	1.024	1.083	1.189	1.13	0.995	0.987	1.057	1.091	0.927	0.906	1.003	0.873	1.089	1.156	1.041	0.963	1.029	1.287	0.934	0.967	1.715	9	9	9	0.921226	0.322862	-0.118373	0.490983	0.880955	0.150882	-0.18286	0.821362
1794	Q19QT8	CRYZ	Crystallin zeta OS=Sus scrofa OX=9823 GN=CRYZ PE=2 SV=1	1.004	0.832	0.876	0.898	1.044	0.726	1.037	1.052	1.019	1.122	0.878	0.891	0.967	0.687	0.701	1.01	0.967	0.932	1.115	1.029	1.159	0.966	0.831	0.94	0.929	0.946	1.022	9	9	9	0.949759	0.342462	-0.074366	0.465388	0.912499	0.151582	-0.132106	0.819354
2787	A0A8W4FIU8	SEC13	Protein SEC13 homolog OS=Sus scrofa OX=9823 GN=SEC13 PE=1 SV=1	0.96	0.914	0.925	1.048	1.242	1.05	1.024	1.105	1.174	0.973	0.848	0.84	1.118	0.936	1.02	0.989	0.978	0.959	0.993	0.974	1.041	0.83	1.085	1.053	1.012	1.059	1.211	9	9	9	1.01987	0.688288	0.0283919	0.16223	0.935515	0.15185	-0.096167	0.818584
184	F1SLR5	CHD4	DNA helicase OS=Sus scrofa OX=9823 GN=CHD4 PE=1 SV=2	1.058	1.135	1.07	1.148	1.018	1.068	1.045	1.049	0.948	1.049	1.031	1.114	0.97	1.021	0.988	1.029	1.02	0.932	1.052	1.096	1.057	0.951	1.05	1.165	0.959	1.066	1.195	9	9	9	0.994578	0.865373	-0.00784321	0.0627967	0.954436	0.151918	-0.067279	0.818391
825	A0A287AN34	MEF2B	Myocyte enhancer factor 2B OS=Sus scrofa OX=9823 GN=MEF2B PE=4 SV=1	1.145	1.133	1.105	1.304	0.908	0.932	1.051	0.989	0.844	1.092	1.079	0.98	1.089	0.803	0.932	0.844	1.031	0.982	0.937	1.007	1.033	0.987	1.187	1.443	0.888	1.016	1.299	9	9	9	0.9606	0.587737	-0.057992	0.230817	0.9015	0.152214	-0.1496	0.817545
2410	F1STB6	GBA2	Non-lysosomal glucosylceramidase OS=Sus scrofa OX=9823 GN=GBA2 PE=1 SV=3	0.999	0.772	0.886	0.971	0.897	1.024	0.879	0.989	1.267	1.035	0.923	0.805	0.801	1.002	0.968	1.038	0.962	0.791	0.973	1.049	1.007	0.898	0.818	1.106	0.943	1.002	1.283	9	9	9	0.956493	0.501001	-0.0641737	0.300161	0.916951	0.152495	-0.125083	0.816745
769	A0A287AT18	PSMA7	Proteasome subunit alpha type OS=Sus scrofa OX=9823 GN=PSMA7 PE=1 SV=1	1.037	1.042	1.081	0.937	1.03	1.12	0.948	1.052	1.174	0.996	0.98	0.975	1.113	1.211	1.038	0.921	0.903	1.089	0.915	0.925	0.995	1.077	1.004	0.86	0.937	1.084	0.833	9	9	9	1.09166	0.0371082	0.12652	1.43053	1.06906	0.152586	0.0963447	0.816486
2495	A0A5G2QJE4	EPS8L2	EPS8 like 2 OS=Sus scrofa OX=9823 GN=EPS8L2 PE=1 SV=1	0.965	0.922	0.983	0.922	0.957	1.114	1.014	0.979	1.054	1.025	0.977	0.941	0.968	1.066	1.002	0.938	0.957	0.972	1.024	1.024	1.05	0.863	1.022	1.154	1.083	0.985	1.046	9	9	9	0.963139	0.273306	-0.0541839	0.563351	0.956221	0.152809	-0.0645841	0.81585
2104	A0A286ZIG4	PDXK	Pyridoxal kinase OS=Sus scrofa OX=9823 GN=PDXK PE=1 SV=2	1	1.008	1.053	0.969	1.022	0.776	0.855	1.036	0.973	1.026	0.884	0.914	1.07	0.715	0.816	0.977	0.928	0.851	0.872	0.862	0.949	0.963	1.103	1.293	0.931	0.851	1.312	9	9	9	0.951401	0.477078	-0.0718745	0.321411	0.895468	0.153267	-0.159285	0.81455
965	A0A286ZZJ3	ZC3HAV1	Zinc finger CCCH-type antiviral protein 1 isoform 1 OS=Sus scrofa OX=9823 GN=ZC3HAV1 PE=1 SV=1	1.042	0.996	0.933	1.117	0.921	0.878	0.965	1.038	0.984	1.097	0.983	0.954	1.003	1.201	1.056	1.048	0.968	0.963	1.007	1.05	1.031	0.844	0.806	0.794	1.033	0.954	1.113	9	9	9	1.02804	0.566979	0.0398897	0.246433	1.07426	0.153486	0.103341	0.813931
751	A0A287BDY5	HMCN1	Hemicentin-1 OS=Sus scrofa OX=9823 GN=HMCN1 PE=4 SV=1	1.036	1.045	1.061	1.015	0.911	0.999	1.163	1.179	1.081	1.013	0.866	0.963	0.912	0.684	0.833	0.992	1.017	0.994	0.974	0.944	0.864	0.878	1.173	1.083	0.936	1.016	1.083	9	9	9	1.06022	0.192189	0.0843592	0.716271	0.924366	0.153938	-0.113464	0.812654
1417	F1RJJ3	SBDS	Ribosome maturation protein SBDS OS=Sus scrofa OX=9823 GN=SBDS PE=1 SV=1	1.032	1.053	1.068	1.091	1.028	1.01	1.123	0.879	0.913	1.04	0.919	0.954	1.003	1.121	1.033	0.928	1.01	1	0.918	0.98	0.971	0.918	1.067	0.966	0.975	0.984	0.806	9	9	9	1.07129	0.0732074	0.0993452	1.13544	1.04927	0.154228	0.0693887	0.811838
125	Q06AT3	UCHL5	Ubiquitin carboxyl-terminal hydrolase isozyme L5 OS=Sus scrofa OX=9823 GN=UCHL5 PE=2 SV=1	1.109	0.877	0.97	1.08	1.059	1.048	0.997	1.084	1.123	1.018	0.847	0.962	0.958	1.111	1.202	0.964	0.945	0.888	0.98	1.074	0.944	1.105	1.241	1.442	1.09	0.991	0.923	9	9	9	0.95475	0.435574	-0.0668055	0.360938	0.90858	0.154485	-0.138314	0.811113
2131	A0A8D0VTQ5	PRTN3	Proteinase 3 OS=Sus scrofa OX=9823 GN=PRTN3 PE=1 SV=1	0.869	0.986	0.836	1.374	0.744	0.894	1.05	1.194	1.204	0.899	0.881	0.946	0.727	1.102	1.313	1.497	1.357	1.111	0.677	0.977	0.881	1.066	0.76	1.083	1.1	0.961	0.994	9	9	9	1.07671	0.40418	0.106636	0.393425	1.15696	0.154752	0.210339	0.810363
496	A0A287AIU1	RPAP1	RNA polymerase II associated protein 1 OS=Sus scrofa OX=9823 GN=RPAP1 PE=3 SV=1	1.041	1.069	1.186	1.086	1.144	1.214	1.006	1.097	1.121	1.019	0.842	0.925	0.957	0.898	1.03	1.114	0.905	0.972	0.887	0.938	1.024	0.968	1.373	1.251	0.86	1.057	1.189	9	9	9	1.04368	0.475245	0.0616776	0.323082	0.907301	0.154916	-0.140347	0.809904
1141	A0A287ASR0	SLC25A10	Solute carrier family 25 member 10 OS=Sus scrofa OX=9823 GN=SLC25A10 PE=3 SV=2	1.261	1.12	1.064	0.968	0.994	0.753	1.017	1.163	1.178	1.134	1.015	0.884	0.879	0.742	0.801	0.984	0.974	0.963	1.108	1.071	0.991	0.834	1.172	0.933	0.949	0.963	1.057	9	9	9	1.04847	0.431345	0.068284	0.365175	0.92267	0.155164	-0.116113	0.809208
2046	A0A5G2QQT4	COMMD9	COMM domain containing 9 OS=Sus scrofa OX=9823 GN=COMMD9 PE=1 SV=1	0.992	0.967	0.942	1.08	1.074	1.058	1.044	1.008	0.916	1.017	0.988	0.912	1.12	1.115	1.103	1.144	1.148	1.113	0.983	1.105	0.996	0.882	1.042	0.971	1.054	1.126	1.008	9	9	9	0.990619	0.766122	-0.0135985	0.115702	1.05378	0.155317	0.0755735	0.80878
975	A0A287AE88	NDUFA9	NADH dehydrogenase [ubiquinone] 1 alpha subcomplex subunit 9, mitochondrial OS=Sus scrofa OX=9823 GN=NDUFA9 PE=1 SV=2	1.133	1.325	1.359	1.214	1.135	1.001	0.934	1.209	1.186	1.087	0.93	1.011	1.106	0.981	1.048	0.77	0.796	0.833	1.054	1.07	1.149	1.028	1.263	1.15	0.93	0.803	0.95	9	9	9	1.11695	0.0773693	0.159567	1.11143	0.911142	0.155525	-0.134252	0.808199
2307	A0A288CFU5	PTBP3	Polypyrimidine tract binding protein 3 OS=Sus scrofa OX=9823 GN=PTBP3 PE=1 SV=1	0.977	1.435	1.268	0.958	1.316	0.684	0.81	0.906	0.783	0.919	1.006	1.138	1.039	0.62	0.63	0.654	0.655	0.843	1.309	1.023	1.174	0.697	1.472	1.177	0.74	0.574	0.964	9	9	9	1.00077	0.995408	0.0011057	0.00199899	0.821906	0.155755	-0.282955	0.807559
2244	A0A4X1TZY1	SLC2A3	Solute carrier family 2, facilitated glucose transporter member 3 OS=Sus scrofa OX=9823 GN=SLC2A3 PE=1 SV=1	0.942	0.904	0.815	1.197	0.994	0.809	0.91	0.882	0.87	0.974	0.852	1.089	0.979	1.032	1.13	1.24	1.038	0.981	0.871	0.942	0.934	0.83	0.952	1.061	0.963	0.965	1.148	9	9	9	0.96042	0.459369	-0.0582626	0.337839	1.07489	0.156116	0.10419	0.806553
2542	A0A480VW61	MFSD10	Major facilitator superfamily domain containing 10 OS=Sus scrofa OX=9823 GN=MFSD10 PE=1 SV=1	1	1.171	1.304	1.17	1.172	1.147	1.055	1.094	1.13	1.112	0.986	0.976	1.031	0.993	1.016	1.037	0.966	1.026	0.999	1.171	1.014	1.092	1.357	1.016	1.062	0.93	1.109	9	9	9	1.05056	0.29479	0.0711642	0.530488	0.937744	0.1562	-0.0927346	0.806319
2746	A0A5G2QRA4	DDX46	RNA helicase OS=Sus scrofa OX=9823 GN=DDX46 PE=1 SV=1	1.026	0.946	0.988	1.08	1.01	1.001	0.987	1.047	0.986	1	0.845	0.9	1.037	0.989	1.009	1.015	0.97	0.855	0.949	1.028	0.941	0.944	1.121	1.096	0.999	1.031	0.951	9	9	9	1.00121	0.963383	0.00175055	0.0162011	0.951435	0.158265	-0.0718232	0.800616
905	I3LAE8	CCDC47	PAT complex subunit CCDC47 OS=Sus scrofa OX=9823 GN=CCDC47 PE=1 SV=2	1.365	1.231	1.272	1.174	1.181	1.154	0.956	0.918	0.971	1.223	0.94	1.09	0.993	0.909	0.977	0.979	0.942	0.909	1.162	1.246	1.4	0.971	1.43	0.81	0.885	0.953	1.224	9	9	9	1.01399	0.865638	0.0200387	0.0626639	0.888999	0.158304	-0.169746	0.800509
2538	I3LUK0	SLC12A9	Solute carrier family 12 member 9 OS=Sus scrofa OX=9823 GN=SLC12A9 PE=3 SV=3	0.776	1.041	0.978	1.122	1.016	0.57	1.071	1.238	1.108	0.669	0.835	0.896	1.116	0.666	0.765	0.833	0.94	0.967	1.023	0.743	0.972	0.733	1.235	1.268	0.918	0.817	1.061	9	9	9	1.0171	0.860691	0.0244669	0.0651527	0.876511	0.158476	-0.190156	0.800037
1552	A0A4X1VPW4	CARHSP1	Calcium regulated heat stable protein 1 OS=Sus scrofa OX=9823 GN=CARHSP1 PE=1 SV=1	1.09	1.149	1.043	0.948	0.962	0.758	1.055	1.021	0.897	1.05	1.136	1.03	0.85	0.633	0.754	0.81	0.964	1.083	1.025	1.023	1.103	0.957	1.104	0.948	0.856	0.932	1.348	9	9	9	0.959875	0.510254	-0.0590812	0.292213	0.893933	0.159005	-0.161762	0.79859
1393	F2Z596	SNX12	Sorting nexin 12 OS=Sus scrofa OX=9823 GN=SNX12 PE=3 SV=2	0.981	1.153	1.152	1.216	1.378	0.933	1.032	1.104	1.085	0.878	0.919	1.002	1.118	0.84	0.943	0.975	0.956	0.993	0.982	0.98	1.019	1.012	1.24	1.06	1.036	0.928	0.918	9	9	9	1.09362	0.100703	0.129117	0.996958	0.939946	0.15909	-0.089351	0.798356
2794	A0A286ZYJ8	UPF1	UPF1 RNA helicase and ATPase OS=Sus scrofa OX=9823 GN=UPF1 PE=1 SV=2	1.121	1.056	1.217	0.95	0.908	0.891	1.035	0.967	0.929	1.052	0.945	1.01	1.046	0.967	1.038	1.015	0.964	0.943	0.993	0.922	0.991	0.93	0.976	1.041	1.024	0.923	0.85	9	9	9	1.04902	0.276213	0.0690385	0.558756	1.03815	0.159121	0.0540153	0.798273
527	F1SFI3	RFC4	Replication factor C subunit 4 OS=Sus scrofa OX=9823 GN=RFC4 PE=1 SV=3	1.068	1.061	1.072	1.118	1.029	1.096	1.048	0.857	0.885	1.114	0.831	0.909	1.067	0.87	1.077	0.868	1.01	0.935	0.948	1.101	0.92	0.987	1.27	1.273	0.893	1.004	1.065	9	9	9	0.976007	0.659858	-0.0350369	0.180549	0.917556	0.159645	-0.124131	0.796845
3019	A0A5G2QL81	PSMA4	Proteasome subunit alpha type OS=Sus scrofa OX=9823 GN=PSMA4 PE=1 SV=1	1.181	1.102	0.993	0.927	0.974	0.946	1.034	1.01	1.013	1.065	0.848	0.983	0.969	0.957	0.92	0.879	0.969	0.905	1.177	1.017	1.082	0.871	1.133	0.854	0.972	0.981	0.975	9	9	9	1.01302	0.7745	0.0186647	0.110979	0.937431	0.159751	-0.0932155	0.796557
345	A0A287AL94	PYGL	Alpha-1,4 glucan phosphorylase OS=Sus scrofa OX=9823 GN=PYGL PE=1 SV=1	1.065	1.018	1.08	0.985	0.99	1.029	1.038	1.094	1.042	1.019	0.956	0.992	0.985	1.008	0.985	1.005	1.007	0.992	0.957	0.943	1.024	0.956	1.08	0.901	0.964	0.954	0.892	9	9	9	1.07727	0.00612236	0.107379	2.21308	1.03206	0.159769	0.0455281	0.796507
441	A0A286ZJI5	DOCK7	Dedicator of cytokinesis 7 OS=Sus scrofa OX=9823 GN=DOCK7 PE=1 SV=2	0.864	0.94	1.004	0.806	1.556	0.755	1.096	1.49	1.205	0.927	0.878	0.926	0.909	0.626	0.762	0.682	1.033	0.976	0.957	0.89	0.886	0.99	0.868	0.832	0.982	0.883	1.27	9	9	9	1.13531	0.247653	0.183089	0.606156	0.901963	0.160508	-0.14886	0.794502
1361	F1RRD4	TRANK1	Tetratricopeptide repeat and ankyrin repeat containing 1 OS=Sus scrofa OX=9823 GN=TRANK1 PE=4 SV=4	0.9	0.893	0.974	1.299	1.042	0.994	0.929	1.228	1.017	0.86	0.788	1.037	1.038	0.914	0.927	0.823	1.005	0.909	0.875	0.97	1.024	0.852	1.155	1.356	0.968	0.778	1.367	9	9	9	0.992616	0.929648	-0.0106918	0.0316815	0.888283	0.160643	-0.17091	0.794138
2142	F1RXS0	SELENOO	Selenoprotein O OS=Sus scrofa OX=9823 GN=SELENOO PE=1 SV=4	0.977	1.099	0.977	1.1	1.04	1.075	1.039	1.532	1.331	0.938	0.929	0.996	0.956	0.865	1.002	0.631	0.72	1.036	1.045	0.975	0.999	1.011	1.381	1.293	0.89	0.662	0.939	9	9	9	1.10604	0.264038	0.145398	0.578333	0.877977	0.160859	-0.187745	0.793553
1368	F1RJ93	TAGLN2	Transgelin OS=Sus scrofa OX=9823 GN=TAGLN2 PE=1 SV=3	1.22	1.027	1.045	1.117	1.014	0.78	1.024	1.059	1.005	1.124	1.169	1.137	0.977	0.952	1.1	1.015	0.987	1.057	1.107	0.906	1.063	0.963	1.086	0.845	1.003	1.046	0.985	9	9	9	1.03187	0.518716	0.0452678	0.28507	1.05709	0.161264	0.0800924	0.792461
1756	A0A287BT57	UCKL1	Uridine-cytidine kinase OS=Sus scrofa OX=9823 GN=UCKL1 PE=3 SV=1	1.097	0.953	0.95	1.08	1.042	1.134	1.045	1.057	1.043	1.019	0.867	0.887	0.928	0.984	1.044	0.977	1.002	1.023	0.949	0.999	0.907	1.003	1.269	1.014	1.071	1.109	0.965	9	9	9	1.01238	0.761663	0.0177569	0.118237	0.940233	0.161586	-0.0889104	0.791596
1106	A0A286ZRZ8	CGNL1	Cingulin like 1 OS=Sus scrofa OX=9823 GN=CGNL1 PE=4 SV=3	1.119	0.898	0.934	1.164	1.332	1.08	0.93	1.074	1.058	1.034	0.914	0.929	1.187	1.122	1.051	1.085	1.083	1.084	1.068	1.087	0.963	1.025	1.521	1.418	1.028	1.021	1.379	9	9	9	0.912369	0.239896	-0.13231	0.619978	0.902854	0.16291	-0.147435	0.788052
2730	A0A5G2QF59	CDK11	Cyclin dependent kinase 11 OS=Sus scrofa OX=9823 GN=CDK11 PE=1 SV=2	1.007	1.116	1.123	1.018	1.044	0.736	1.056	1.138	1.007	1.023	0.907	0.944	0.765	0.71	0.799	0.631	0.854	0.784	0.984	0.977	0.983	0.579	1.138	1.109	0.749	0.808	1.063	9	9	9	1.10191	0.216822	0.140003	0.663897	0.884029	0.163948	-0.177835	0.785294
112	I3LLW0	RBM12	RNA binding motif protein 12 OS=Sus scrofa OX=9823 GN=RBM12 PE=4 SV=3	0.964	0.877	0.94	1.034	0.989	1.039	0.957	0.965	0.971	0.944	0.961	0.901	0.976	0.97	1.051	1.013	0.96	0.905	0.999	1.049	0.962	1.119	1.067	1.014	0.906	1.003	0.926	9	9	9	0.965837	0.236986	-0.0501476	0.625277	0.959757	0.164295	-0.0592593	0.784375
1265	I3LGT3	LAD1	Ladinin 1 OS=Sus scrofa OX=9823 GN=LAD1 PE=1 SV=4	1.046	0.978	1	0.914	0.979	0.82	1.029	1.014	1.115	0.972	1.078	0.945	1.1	0.929	0.962	1.033	0.916	0.956	1.118	1.027	1.243	0.906	0.953	1.272	0.935	0.974	1.134	9	9	9	0.930245	0.184974	-0.104318	0.73289	0.929826	0.164298	-0.104967	0.784369
21	F1SR53	ITGA5	Integrin alpha-5 OS=Sus scrofa OX=9823 GN=ITGA5 PE=1 SV=3	0.901	0.943	1.03	1.06	1.025	1.06	0.991	1.053	1.089	0.915	0.927	0.906	1.014	1.135	1.145	0.962	1.077	1.067	0.987	1.145	0.945	0.809	0.812	0.929	1.033	0.868	0.993	9	9	9	1.07405	0.11588	0.103064	0.935993	1.07358	0.164629	0.102434	0.783493
2831	A0A286ZSP8	Gamma-interferon-inducible protein 16 isoform 1 OS=Sus scrofa OX=9823 PE=1 SV=1	Gamma-interferon-inducible protein 16 isoform 1 OS=Sus scrofa OX=9823 PE=1 SV=1	1.063	0.915	0.837	1.053	1.144	0.681	1.028	0.442	0.66	1.049	1.059	0.958	1.251	0.996	0.978	1.095	1.078	0.938	1.056	1.085	1.077	0.805	0.815	1.096	0.961	1.023	0.756	9	9	9	0.901891	0.31328	-0.148975	0.504068	1.08393	0.164698	0.11627	0.783312
862	Q95250	PGRMC1	Membrane-associated progesterone receptor component 1 OS=Sus scrofa OX=9823 GN=PGRMC1 PE=1 SV=3	1.038	0.993	1.015	1.005	1.021	0.874	0.999	0.972	0.963	1.032	1.045	0.95	1.055	0.874	1.052	0.989	1.082	0.901	1.059	1.039	1.062	0.977	0.997	1.151	0.961	1.004	1.234	9	9	9	0.936314	0.0679208	-0.094936	1.168	0.946858	0.164758	-0.0787802	0.783153
224	F1RRJ3	YIPF3	Protein YIPF3 OS=Sus scrofa OX=9823 GN=YIPF3 PE=2 SV=1	0.829	0.749	0.759	0.909	0.806	0.958	1.099	0.905	1.007	0.981	0.974	0.736	0.836	0.897	0.889	0.987	1	0.909	0.774	0.734	0.801	1.464	2.169	1.036	0.976	1.034	1.335	9	9	9	0.777003	0.137481	-0.364008	0.861759	0.795215	0.164959	-0.330584	0.782623
2030	F1SFJ8	DNAJB11	DnaJ homolog subfamily B member 11 OS=Sus scrofa OX=9823 GN=DNAJB11 PE=1 SV=1	1.077	0.962	0.933	1.07	1.081	0.899	1.053	1.144	0.99	0.96	1.028	0.995	1.089	0.897	0.969	0.975	1.025	0.906	1.039	1.075	1.086	1.013	1.287	1.368	0.898	0.886	0.973	9	9	9	0.956779	0.461653	-0.063742	0.335684	0.918857	0.165262	-0.122088	0.781826
2445	A0A287AZ54	PDXP	Pyridoxal phosphatase OS=Sus scrofa OX=9823 GN=PDXP PE=1 SV=1	0.922	0.939	0.891	1.054	0.948	0.865	0.911	1.018	1.138	1.007	0.869	0.899	0.856	0.911	0.907	0.929	0.941	0.83	0.972	1.147	0.922	0.826	0.814	1.231	0.902	0.894	1.202	9	9	9	0.97486	0.690994	-0.0367335	0.160526	0.91459	0.165871	-0.128802	0.780228
1596	I3LIC8	RASIP1	Ras interacting protein 1 OS=Sus scrofa OX=9823 GN=RASIP1 PE=1 SV=3	0.989	0.919	1.094	0.875	0.966	0.818	1	1.261	1.203	0.897	0.92	1.015	0.9	0.65	0.879	1.022	0.963	0.963	0.955	0.876	1.045	0.919	0.893	1.123	0.998	0.959	1.039	9	9	9	1.03611	0.538528	0.0511739	0.268792	0.932099	0.166256	-0.101444	0.779223
127	A0A481A893	TXNDC12	Thioredoxin domain-containing protein 12 OS=Sus scrofa OX=9823 GN=TXNDC12 PE=1 SV=1	1.173	1.08	0.861	1.006	0.88	0.961	1.097	0.972	0.926	0.895	1.049	1.004	0.947	0.94	1.039	1.004	0.915	1.048	1.069	1.032	1	0.8	1.259	1.246	0.959	0.955	1.424	9	9	9	0.91913	0.252158	-0.12166	0.598328	0.907328	0.166852	-0.140305	0.777669
1425	A0A287AQH0	GATAD2B	GATA zinc finger domain containing 2B OS=Sus scrofa OX=9823 GN=GATAD2B PE=1 SV=1	0.944	0.924	0.979	1.048	0.935	0.79	1.05	1.023	0.906	0.904	1.017	0.795	1.04	0.864	0.988	0.958	0.977	0.934	1.009	0.974	0.878	1.029	1.149	1.09	0.93	0.979	0.935	9	9	9	0.958319	0.304026	-0.0614215	0.517089	0.944723	0.167043	-0.0820366	0.777172
2438	I3LLH5	PIN1	Peptidyl-prolyl cis-trans isomerase OS=Sus scrofa OX=9823 GN=PIN1 PE=1 SV=1	1.068	1.102	1.155	1.082	0.931	0.778	1.038	1.068	0.994	1.063	0.959	1.063	1.083	0.771	0.849	0.876	0.93	1.006	1.039	1.158	1.086	0.915	0.958	1.146	0.941	0.876	1.155	9	9	9	0.993746	0.904077	-0.00905101	0.0437944	0.927324	0.167376	-0.108855	0.776306
426	A0A287B3M2	DNAJC7	DnaJ heat shock protein family (Hsp40) member C7 OS=Sus scrofa OX=9823 GN=DNAJC7 PE=1 SV=1	1.124	0.945	0.916	1.062	0.969	0.92	1.021	0.803	0.676	0.978	0.822	0.93	1.067	0.82	0.96	0.851	0.995	0.912	0.98	0.933	1.101	1.024	1.081	0.991	0.755	0.926	1.235	9	9	9	0.934633	0.31578	-0.0975277	0.500615	0.923443	0.167468	-0.114905	0.776069
530	F1SIS9	NDUFA10	NADH dehydrogenase [ubiquinone] 1 alpha subcomplex subunit 10, mitochondrial OS=Sus scrofa OX=9823 GN=NDUFA10 PE=1 SV=1	1.059	1.081	1.042	0.87	0.871	0.843	0.869	0.918	0.849	1.021	0.877	1.025	0.964	0.802	0.926	0.845	0.896	0.985	1.007	1.011	1.132	0.825	1.001	0.85	0.914	1.033	1.379	9	9	9	0.918051	0.21721	-0.123354	0.663121	0.911385	0.167702	-0.133867	0.775463
1291	M9MMN6	SIRPA	Signal regulatory protein alpha OS=Sus scrofa OX=9823 GN=SIRPA PE=1 SV=1	1.072	0.977	0.924	1.019	1.026	0.914	1.051	0.88	0.845	1.027	1.033	1.069	1.012	1.001	1.143	1.082	1.039	0.994	0.957	1.031	1.1	0.981	0.876	0.993	0.988	0.998	1.106	9	9	9	0.964341	0.330363	-0.0523846	0.481009	1.04097	0.168095	0.0579348	0.774444
828	A0A4X1UHC4	DDA1	DET1- and DDB1-associated protein 1 OS=Sus scrofa OX=9823 GN=DDA1 PE=1 SV=1	1.058	1.129	1.329	1.606	1.476	1.26	1.095	1.287	1.136	1.075	0.745	1.048	1.152	1.106	1.015	0.918	1.054	1.024	1.151	1.031	0.961	1.423	1.673	1.212	0.98	0.928	1.003	9	9	9	1.09786	0.294631	0.134691	0.530721	0.88178	0.168354	-0.18151	0.773777
541	F1S098	HERC1	HECT and RLD domain containing E3 ubiquitin protein ligase family member 1 OS=Sus scrofa OX=9823 GN=HERC1 PE=4 SV=2	0.92	1.052	1.083	0.993	0.967	1.155	0.92	1.121	1.164	1	0.864	1.085	0.953	1.152	1.034	0.958	0.979	1.097	1.056	0.919	1.043	0.799	0.941	0.92	1.017	0.978	0.937	9	9	9	1.08885	0.0571843	0.122805	1.24272	1.05947	0.168395	0.0833369	0.77367
2701	F1S179	TSTD1	Thiosulfate sulfurtransferase like domain containing 1 OS=Sus scrofa OX=9823 GN=TSTD1 PE=1 SV=3	1.153	1.248	1.193	1	1.252	1.037	1.073	1.136	1.024	1.105	1.052	1.038	1.066	1.025	1.17	0.854	0.996	1.064	1.1	0.963	1.271	1.125	1.343	1.15	0.952	0.913	1.567	9	9	9	0.974191	0.707961	-0.0377233	0.149991	0.90235	0.168576	-0.148241	0.773204
175	K7GSL3	OGT	UDP-N-acetylglucosamine--peptide N-acetylglucosaminyltransferase 110 kDa subunit OS=Sus scrofa OX=9823 GN=OGT PE=3 SV=1	1.061	1.085	1.131	1.059	0.932	0.973	1.059	1.002	1.037	1.039	0.901	0.955	0.995	0.986	0.967	0.984	0.979	0.967	1.072	1.058	1.08	0.933	0.93	1.179	1.013	0.96	0.954	9	9	9	1.01743	0.61418	0.0249311	0.211705	0.955769	0.168666	-0.0652667	0.772973
3056	F1RHR8	MTOR	Serine/threonine-protein kinase mTOR OS=Sus scrofa OX=9823 GN=MTOR PE=1 SV=4	1.119	1.185	1.332	0.949	0.717	0.856	1.04	1.084	1.169	1.045	0.849	1.15	0.769	0.751	0.779	0.932	1.025	1.029	1.048	1.004	1.107	0.794	1.128	0.992	1.003	0.925	1.104	9	9	9	1.038	0.598401	0.053808	0.223008	0.914772	0.168919	-0.128516	0.772322
2788	A0A287B2T9	CSDE1	Cold shock domain containing E1 OS=Sus scrofa OX=9823 GN=CSDE1 PE=1 SV=1	1.034	1.056	1.028	1.179	1.137	1.105	1.14	0.966	1.025	1.024	1.013	0.993	1.13	0.943	1.041	0.985	0.985	0.936	1.019	1.025	1.074	1.025	1.276	1.059	1.047	0.886	1.183	9	9	9	1.00792	0.848087	0.0113835	0.0715593	0.943298	0.169216	-0.0842146	0.771558
1439	A0A8W4FDL5	CD200	CD200 molecule OS=Sus scrofa OX=9823 GN=CD200 PE=1 SV=1	1.206	1.033	1.084	1.163	0.948	0.911	1.081	0.831	0.734	0.949	0.809	0.938	1.036	0.687	0.953	0.764	1.042	0.997	1.051	1.003	0.914	0.969	1.148	1.158	0.756	0.859	1.122	9	9	9	1.00122	0.986149	0.00176614	0.00605746	0.910356	0.169706	-0.135497	0.770302
1061	A0A287AW81	FLNA	Filamin A OS=Sus scrofa OX=9823 GN=FLNA PE=1 SV=3	1.071	1.554	1.228	1.016	1.068	1.074	0.981	1.054	0.921	1.182	2.556	0.977	0.985	1.11	1	0.937	0.972	1.054	0.94	0.839	1.102	1.065	1.02	0.696	1.016	1.058	0.62	9	9	9	1.1928	0.0511898	0.254347	1.29082	1.28925	0.169848	0.366536	0.76994
2849	F2Z5C1	ANXA5	Annexin OS=Sus scrofa OX=9823 GN=ANXA5 PE=1 SV=4	0.948	0.886	0.924	1.042	0.957	1.013	0.931	1.111	1.162	0.952	0.89	0.839	0.947	0.934	1.002	1.033	0.933	0.944	0.994	0.928	0.897	1.003	0.945	0.986	0.985	0.98	1.184	9	9	9	1.00809	0.847765	0.0116217	0.0717244	0.951921	0.169924	-0.0710864	0.769745
2487	K7GNT3	UBR5	Ubiquitin protein ligase E3 component n-recognin 5 OS=Sus scrofa OX=9823 GN=UBR5 PE=1 SV=4	0.89	0.943	0.87	0.992	1.115	0.873	1.06	1.164	1.136	0.902	0.831	0.915	0.987	0.807	0.847	0.974	0.957	0.972	0.874	0.991	0.809	1.242	1.303	1.146	0.901	0.953	0.832	9	9	9	0.999116	0.990344	-0.00127573	0.00421376	0.905093	0.170136	-0.143861	0.769203
1610	A0A287ALM0	DNPEP	Aspartyl aminopeptidase OS=Sus scrofa OX=9823 GN=DNPEP PE=1 SV=1	0.955	0.953	0.957	1.004	1.016	0.974	1.077	0.98	1.035	1.029	0.925	0.908	0.953	0.851	0.944	1.009	0.985	1.149	0.919	0.986	0.984	1.034	1.072	1.113	0.994	1.354	0.967	9	9	9	0.94991	0.273527	-0.0741376	0.562999	0.928897	0.170421	-0.106409	0.768476
517	A0A5G2Q797	LGALS1	Galectin OS=Sus scrofa OX=9823 GN=LGALS1 PE=1 SV=1	0.844	0.825	0.886	0.885	1.05	0.929	1.017	0.914	0.893	0.799	0.931	0.896	1.018	1.083	0.978	1.118	1.065	1.048	0.808	0.911	0.863	1.029	0.709	0.779	1.111	0.999	1.003	9	9	9	1.00377	0.946957	0.00543587	0.0236698	1.08816	0.170595	0.121896	0.768035
461	A8U4R4	TKT	Transketolase OS=Sus scrofa OX=9823 GN=TKT PE=1 SV=1	1.085	1.004	1.004	0.999	0.994	1.013	1.079	1.091	1.202	1.035	0.996	0.998	0.999	0.965	0.964	1.019	1.005	1.059	0.981	0.928	1.071	0.948	1.014	0.904	0.986	1.022	0.902	9	9	9	1.08166	0.0176823	0.113245	1.75246	1.03243	0.17071	0.0460508	0.767741
5	A0A5G2R847	STX7	Syntaxin-7 OS=Sus scrofa OX=9823 GN=STX7 PE=1 SV=1	1.088	0.997	0.85	0.962	0.813	0.927	1.09	0.781	0.821	0.947	0.979	1.16	0.945	0.91	0.955	0.94	0.982	0.829	1.044	0.973	1.217	1.015	0.892	0.955	0.955	1.116	1.044	9	9	9	0.904245	0.0725252	-0.145214	1.13951	0.938769	0.170983	-0.0911581	0.767046
1820	K7GQ35	IGBP1	Immunoglobulin binding protein 1 OS=Sus scrofa OX=9823 GN=IGBP1 PE=1 SV=1	1.011	1.012	0.998	1.132	1.068	1.014	0.903	0.999	0.915	1.011	0.868	0.84	1.017	1.004	0.931	0.848	0.751	0.996	0.932	0.846	0.94	1.065	1.088	1.089	0.992	1.241	0.797	9	9	9	1.0069	0.895576	0.00991547	0.0478975	0.919466	0.171366	-0.121132	0.766076
1365	A0A5G2QHK1	RSC1A1	Regulator of solute carriers 1 OS=Sus scrofa OX=9823 GN=RSC1A1 PE=1 SV=1	1.069	0.985	0.968	1.039	1.012	0.848	1.022	0.743	0.764	1.001	0.983	0.925	1.121	0.982	1.002	0.962	1.013	0.938	0.991	0.937	1.062	1.109	1.224	1.217	0.823	0.996	1.273	9	9	9	0.877284	0.0587108	-0.188884	1.23128	0.926806	0.171386	-0.10966	0.766025
1931	A0A287A270	MYO1A	Unconventional myosin-Ia OS=Sus scrofa OX=9823 GN=MYO1A PE=1 SV=1	1.162	0.915	1.03	0.862	0.94	0.891	0.956	1.057	1.057	1.008	1.102	0.964	0.99	0.926	0.869	0.982	0.895	0.905	1.122	0.971	1.223	0.875	1.002	1.066	0.956	1.023	0.948	9	9	9	0.9656	0.470238	-0.0505027	0.327683	0.940671	0.171633	-0.0882385	0.7654
2944	A0A287APK0	PGLS	6-phosphogluconolactonase OS=Sus scrofa OX=9823 GN=PGLS PE=1 SV=1	1.21	1.036	1.08	0.951	0.951	0.995	1.093	0.94	0.957	1.057	0.995	1.057	0.977	1.097	1.065	1.194	0.957	1.056	1.064	0.957	1.042	1.112	0.875	0.974	1.014	1.07	0.869	9	9	9	1.02629	0.537126	0.0374376	0.269923	1.05325	0.172077	0.0748441	0.764276
64	A0A481BLI9	SERPIND1	Heparin cofactor 2 OS=Sus scrofa OX=9823 GN=SERPIND1 PE=1 SV=1	0.911	1.004	0.875	1.044	0.852	0.866	0.979	0.973	1.132	1.092	1.044	0.868	1.087	1.074	1.072	1.059	0.95	0.99	0.998	1.119	0.989	1.325	1.094	1.355	0.963	1.046	1.05	9	9	9	0.8689	0.0233398	-0.202737	1.6319	0.929269	0.172115	-0.105833	0.764181
1048	A0A287A0J6	SLC4A4	Anion exchange protein OS=Sus scrofa OX=9823 GN=SLC4A4 PE=3 SV=2	0.959	0.84	0.907	0.92	0.982	0.934	1.095	1.05	1.124	1.013	0.88	0.92	1.092	0.861	0.862	1.002	0.924	0.996	1.075	0.966	0.953	0.824	1.051	1.273	0.894	0.994	1.486	9	9	9	0.925914	0.318252	-0.11105	0.497229	0.898487	0.172323	-0.154431	0.763656
1934	F2Z5N9	PELO	Protein pelota homolog OS=Sus scrofa OX=9823 GN=PELO PE=3 SV=3	0.954	0.892	0.908	0.876	0.969	1.036	0.913	1.021	1.026	0.93	0.896	1	0.947	1.042	0.895	0.85	1.013	0.985	0.927	0.947	0.955	0.722	0.895	0.98	0.913	0.946	0.836	9	9	9	1.05837	0.13654	0.0818403	0.86474	1.05381	0.172578	0.0756163	0.763016
339	A0A8D0R9P0	GPD1L	Glycerol-3-phosphate dehydrogenase [NAD(+)] OS=Sus scrofa OX=9823 GN=GPD1L PE=1 SV=1	0.995	0.947	0.987	0.909	0.946	1.036	0.975	1.071	1.184	1.007	0.899	0.974	1.098	1.053	0.982	1.042	1.05	0.979	0.968	0.996	0.936	0.968	0.985	0.903	1.079	1.025	0.811	9	9	9	1.04371	0.277778	0.0617194	0.556302	1.04763	0.172613	0.0671293	0.762925
1755	A0A5G2R844	CENPV	Centromere protein V OS=Sus scrofa OX=9823 GN=CENPV PE=1 SV=1	1.102	1.102	1.139	0.943	0.967	1.026	0.951	0.94	0.842	1.06	1.295	1.109	1.217	0.823	1.021	0.979	1.079	1.209	1.047	0.996	1.179	0.803	1.082	0.936	0.781	0.894	1.191	9	9	9	1.01156	0.850237	0.0165838	0.0704601	1.09911	0.17305	0.13634	0.761828
1333	A0A5G2RAT7	HDAC7	Histone deacetylase OS=Sus scrofa OX=9823 GN=HDAC7 PE=3 SV=2	0.858	1.004	0.96	1.087	0.982	1.01	0.933	0.929	1.335	1.093	0.936	0.95	1.097	1.096	0.993	1.28	1.106	1.015	0.976	1.128	0.924	0.932	1.02	1.147	0.896	0.85	1.062	9	9	9	1.01824	0.756393	0.0260817	0.121253	1.07062	0.17332	0.0984481	0.761151
1566	A0A5G2Q9Y0	HGS	Hepatocyte growth factor-regulated tyrosine kinase substrate OS=Sus scrofa OX=9823 GN=HGS PE=1 SV=1	1.196	0.994	1.284	1.165	1.096	0.635	0.817	1.024	0.899	1.12	0.739	1.193	1.237	0.649	0.788	0.812	0.802	0.826	1.178	1.311	1.157	0.846	1.149	1.076	1.079	0.755	0.837	9	9	9	0.970388	0.742091	-0.0433668	0.129543	0.869834	0.173368	-0.201188	0.761031
604	F1SCD0	LOC396685	Serpin domain-containing protein OS=Sus scrofa OX=9823 GN=LOC396685 PE=1 SV=3	0.955	1.138	0.928	0.878	0.949	0.994	1.116	1	1.041	1.016	0.682	0.941	0.977	1.209	1.119	1.369	0.924	0.726	0.828	0.845	0.858	0.833	0.971	0.831	1.081	0.769	0.911	9	9	9	1.13523	0.0128067	0.18299	1.89256	1.13069	0.174073	0.177207	0.759269
2099	P62831	RPL23	Large ribosomal subunit protein uL14 OS=Sus scrofa OX=9823 GN=RPL23 PE=1 SV=1	1.077	1.065	1.081	1.201	1.114	1.071	1.192	1.04	1.322	1.017	0.887	0.963	1.19	1.004	0.962	1.038	1.091	1.035	1.018	0.879	1.073	1.125	1.249	1.099	1.06	1.024	1.417	9	9	9	1.02202	0.68854	0.0314281	0.162071	0.923874	0.174392	-0.114232	0.758473
484	A0A5G2RIC7	F13A1	Coagulation factor XIII A chain OS=Sus scrofa OX=9823 GN=F13A1 PE=1 SV=1	1.041	1.112	1.128	1.155	1.066	0.952	1.1	1.076	0.97	0.98	0.945	0.944	1.035	0.883	1.298	0.962	1.05	1.073	0.929	1.049	1.004	1.213	1.36	1.34	0.999	1.112	1.009	9	9	9	0.958562	0.435921	-0.0610561	0.360593	0.915627	0.174584	-0.127169	0.757997
2301	F1S3D5	LMAN2	Lectin, mannose binding 2 OS=Sus scrofa OX=9823 GN=LMAN2 PE=1 SV=1	1.098	0.943	0.98	0.92	0.997	0.959	0.964	0.985	1.048	1.023	0.967	0.924	0.946	0.981	0.967	1.002	0.923	0.943	0.954	0.916	1.028	0.975	0.883	0.925	0.908	0.968	0.835	9	9	9	1.05982	0.0492216	0.0838177	1.30784	1.03384	0.174645	0.0480154	0.757845
1618	F1S4P6	EIF3A	Eukaryotic translation initiation factor 3 subunit A OS=Sus scrofa OX=9823 GN=EIF3A PE=1 SV=2	0.984	1.139	1.097	1.098	1.014	0.886	1.079	1.067	0.945	0.95	0.944	0.993	1.012	0.884	0.955	0.897	0.965	0.974	1.065	0.968	1.049	0.854	1.038	1.159	0.912	0.88	1.272	9	9	9	1.01218	0.81804	0.0174629	0.0872254	0.932261	0.175823	-0.101195	0.754925
1677	F2Z4Z1	YWHAG	14-3-3 protein gamma OS=Sus scrofa OX=9823 GN=YWHAG PE=1 SV=1	0.966	1.019	0.958	0.996	1.021	1.028	1.056	0.782	0.783	0.992	1.104	0.923	1.018	1.096	1.105	1.036	1.012	1.023	1.033	1	1.011	0.965	0.779	0.951	1.029	1.019	1.076	9	9	9	0.971342	0.537007	-0.0419494	0.27002	1.05032	0.176111	0.0708311	0.754214
2680	F1RZ66	ST6GALNAC1	alpha-N-acetylgalactosaminide alpha-2,6-sialyltransferase OS=Sus scrofa OX=9823 GN=ST6GALNAC1 PE=3 SV=3	1.059	1.037	1.008	0.981	0.973	0.925	1.069	1.14	1.763	0.952	1.026	0.954	0.941	0.8	0.861	1.215	0.997	0.83	0.94	0.831	1.063	0.984	1.047	1.358	0.83	1.14	1.699	9	9	9	1.00637	0.956182	0.00915908	0.0194596	0.866963	0.176484	-0.205957	0.753295
2513	A0A8D0W757	TRAPPC8	Trafficking protein particle complex 8 OS=Sus scrofa OX=9823 GN=TRAPPC8 PE=4 SV=1	0.886	0.966	0.917	0.812	0.737	0.669	0.968	1.07	1.19	0.984	0.842	0.926	0.953	0.684	0.798	1.035	0.993	0.891	0.953	1.071	0.965	0.815	0.925	0.929	0.918	0.977	1.266	9	9	9	0.931512	0.341637	-0.102355	0.466436	0.919152	0.17653	-0.121625	0.753182
493	I3LHP0	DPH1	2-(3-amino-3-carboxypropyl)histidine synthase subunit 1 OS=Sus scrofa OX=9823 GN=DPH1 PE=3 SV=2	1.151	1.102	0.872	1.389	1.179	0.96	0.775	1.066	0.942	0.869	0.932	0.918	0.884	1.016	1.088	0.903	1.005	0.949	1.27	0.936	0.931	1.123	1.062	1.267	0.882	0.726	1.293	9	9	9	0.99431	0.948067	-0.00823267	0.0231611	0.902424	0.176865	-0.148123	0.752357
2947	F1SM33	SLC51B	Organic solute transporter subunit beta OS=Sus scrofa OX=9823 GN=SLC51B PE=1 SV=3	1.073	0.962	0.949	1.144	1.19	1.334	1.088	1.116	1.173	0.907	1.016	0.868	1.126	1.168	1.213	1.095	1.022	0.915	1.104	0.96	1.11	1.099	1.29	1.293	1.063	1.136	0.988	9	9	9	0.998606	0.977758	-0.00201253	0.00976844	0.929005	0.176985	-0.106241	0.752064
240	F1SN71	AMBP	Protein AMBP OS=Sus scrofa OX=9823 GN=AMBP PE=3 SV=4	0.935	0.805	0.657	0.978	0.716	1.125	1.012	1.077	1.276	0.934	0.738	0.744	0.883	0.928	1.104	1.075	0.938	0.993	0.869	0.943	0.78	1.105	0.9	1.356	1.003	1.184	1.137	9	9	9	0.924976	0.401785	-0.112513	0.396007	0.898674	0.176991	-0.15413	0.75205
1444	A0A5G2QIJ7	MEF2D	Myocyte enhancer factor 2D OS=Sus scrofa OX=9823 GN=MEF2D PE=4 SV=1	1.095	1.073	1.076	1.05	0.965	1.128	0.919	0.874	0.845	1.018	1.085	0.917	0.834	1.1	0.921	1.03	0.961	0.856	0.91	1.181	0.897	1.122	1.161	0.872	0.948	1.101	1.285	9	9	9	0.952306	0.420626	-0.0705035	0.376104	0.920333	0.177311	-0.119771	0.751263
1043	A0A4X1TRS6	POLR2K	RNA polymerase II, I and III subunit K OS=Sus scrofa OX=9823 GN=POLR2K PE=1 SV=1	0.986	1.03	0.996	1.055	0.901	1.007	1.068	1.172	1.182	0.998	0.757	0.878	0.893	0.776	0.967	0.961	1.077	1.032	0.84	0.907	0.83	0.849	1.274	1.272	0.941	1.2	1.183	9	9	9	1.01086	0.877732	0.0155902	0.0566382	0.897052	0.177332	-0.156736	0.751214
1935	I3LRD5	EIF4H	Eukaryotic translation initiation factor 4H OS=Sus scrofa OX=9823 GN=EIF4H PE=1 SV=1	1.079	1.166	1.237	0.947	1.126	0.742	1.137	1.031	0.992	0.915	1.002	1.156	0.971	0.803	0.918	0.887	1.009	1.017	1.051	0.995	1.054	0.965	1.215	1.522	0.97	0.936	0.904	9	9	9	0.983874	0.834065	-0.0234541	0.0788001	0.90283	0.177429	-0.147474	0.750976
1740	F1S5A8	DHX15	RNA helicase OS=Sus scrofa OX=9823 GN=DHX15 PE=1 SV=1	1.04	0.997	0.985	1.032	0.99	0.993	1.043	1.055	1.05	1.02	0.906	0.94	0.952	0.926	0.965	0.943	0.993	0.986	0.976	0.949	0.988	0.956	1.007	0.967	0.965	0.97	1.071	9	9	9	1.03797	0.0305261	0.0537653	1.51533	0.975364	0.17757	-0.0359867	0.750631
2980	C5H0C6	OTUB1	Ubiquitin thioesterase OS=Sus scrofa OX=9823 GN=OTUB1 PE=1 SV=1	1.095	0.928	1.047	0.875	0.859	0.934	1.042	0.895	0.948	1.057	0.867	1.003	0.887	1.009	0.931	1.122	1.003	0.949	0.96	0.905	1.009	0.956	0.822	0.73	1.05	1	0.836	9	9	9	1.04294	0.389938	0.0606515	0.409005	1.06773	0.17829	0.0945482	0.748874
1281	F1S7E1	COPE	Coatomer subunit epsilon OS=Sus scrofa OX=9823 GN=COPE PE=1 SV=4	1.166	0.807	0.88	1.184	0.846	1.073	1.071	1.105	1.13	0.991	0.949	0.82	0.938	1.029	0.967	1.026	1.037	0.94	0.881	0.995	1.038	0.93	0.969	1.212	0.998	1.018	1.308	9	9	9	0.990694	0.885735	-0.0134883	0.0526962	0.93026	0.178448	-0.104294	0.748488
888	I3LJR4	POLR2A	DNA-directed RNA polymerase subunit OS=Sus scrofa OX=9823 GN=POLR2A PE=1 SV=4	1.108	1.055	1.073	1.013	1.066	0.956	1.039	1.14	1.103	0.965	0.894	0.918	1.05	0.989	0.945	0.947	1.006	1.066	0.958	0.994	0.922	1.126	0.995	1.096	1.016	0.968	1.087	9	9	9	1.04268	0.162849	0.0602913	0.788214	0.958306	0.179422	-0.0614416	0.746123
2279	F2Z5A8	SMC1A	Structural maintenance of chromosomes protein OS=Sus scrofa OX=9823 GN=SMC1A PE=1 SV=2	0.989	0.976	0.966	1.091	1.094	1.063	1.051	1.057	1.001	1.055	0.899	0.94	1	0.99	1.001	0.956	0.921	0.944	1.005	1.013	1.056	0.972	1.215	1.066	0.935	0.997	0.892	9	9	9	1.01497	0.670193	0.0214386	0.1738	0.951371	0.179515	-0.0719194	0.745899
1354	A0A8W4FFK2	STMN1	Stathmin OS=Sus scrofa OX=9823 GN=STMN1 PE=1 SV=1	1.104	1.308	1.222	1.144	1.094	1.155	1.147	1.256	0.992	1.074	0.904	1.074	0.936	0.841	0.961	0.677	1.002	0.893	0.997	0.986	0.991	1.027	1.072	1.033	0.951	0.992	0.889	9	9	9	1.16603	0.000560469	0.221608	3.25145	0.935556	0.179782	-0.096104	0.745254
1080	A0A287AWN1	MCRIP1	MAPK regulated corepressor interacting protein 1 OS=Sus scrofa OX=9823 GN=MCRIP1 PE=3 SV=2	1.061	1.015	0.936	0.985	0.974	0.949	1.073	0.96	0.969	1.119	0.932	1.315	1.045	1.173	1.036	1.151	1.1	0.929	1.019	1.054	0.88	0.999	0.794	1.138	0.989	1.06	1.161	9	9	9	0.981086	0.657642	-0.0275479	0.182011	1.07763	0.180425	0.107867	0.743702
1938	A0A287BFZ3	WFS1	Wolframin ER transmembrane glycoprotein OS=Sus scrofa OX=9823 GN=WFS1 PE=1 SV=2	0.788	1.746	1.481	1.1	1.09	0.889	1.052	0.839	0.726	0.843	1.198	0.987	1.094	1.105	1.186	0.952	1.057	0.969	0.817	0.849	1.001	0.757	1.031	1.114	0.901	0.909	1.218	9	9	9	1.12958	0.335543	0.175787	0.474252	1.09236	0.180947	0.127445	0.74245
1463	A0A480QKC9	GBA3	Glucosylceramidase beta 3 OS=Sus scrofa OX=9823 GN=GBA3 PE=1 SV=1	1.006	1.178	1.109	0.829	0.958	1.138	1.093	1.163	0.969	1.136	0.97	0.866	0.916	0.856	0.816	1.096	1.102	1.099	1.145	0.959	1.208	0.919	1.19	1.238	1.041	0.993	0.918	9	9	9	0.98252	0.750821	-0.0254413	0.124463	0.921548	0.181068	-0.117868	0.742158
1252	F1RR27	ARHGAP27	Rho GTPase activating protein 27 OS=Sus scrofa OX=9823 GN=ARHGAP27 PE=4 SV=4	0.938	1.091	1.047	0.945	1.04	0.979	1.05	1.357	1.398	0.897	0.765	0.817	1.099	0.971	1.055	0.978	1.111	1.054	1.063	1.111	0.972	0.935	0.857	1.126	1.653	0.914	1.284	9	9	9	0.99294	0.938553	-0.0102216	0.027541	0.882199	0.181206	-0.180824	0.741827
1319	A0A288CG37	HNF4A	Hepatocyte nuclear factor 4 alpha OS=Sus scrofa OX=9823 GN=HNF4A PE=3 SV=1	0.912	0.81	0.887	0.977	0.911	1.013	1.04	1.116	1.141	0.938	0.851	0.856	0.877	0.958	0.879	0.927	1.119	1.131	1.042	1.02	0.934	0.878	1.133	1.095	0.907	1	1.122	9	9	9	0.964516	0.464261	-0.0521222	0.333238	0.934837	0.181233	-0.0972127	0.741763
1324	A0A8W4FHK5	PSMF1	Proteasome inhibitor PI31 subunit OS=Sus scrofa OX=9823 GN=PSMF1 PE=1 SV=1	1.132	0.988	1.137	1.059	0.974	1.005	1.028	0.929	0.96	1.13	1.049	1.083	1.044	1.041	1.066	1.085	1.034	1.044	1.02	1.125	1.101	0.941	1.051	1.063	0.874	0.984	1.052	9	9	9	1.00011	0.997573	0.000156619	0.00105521	1.03963	0.18169	0.0560654	0.740669
600	A0A4X1T7P6	BAK1	BCL2 antagonist/killer 1 OS=Sus scrofa OX=9823 GN=BAK1 PE=1 SV=1	1.093	0.895	0.863	0.95	0.892	0.89	1.064	0.96	0.917	0.995	0.884	0.918	0.982	0.954	0.92	0.896	1.032	0.926	0.912	1.018	1.012	0.902	0.901	1.165	0.935	1.009	1.452	9	9	9	0.915968	0.208583	-0.126631	0.680722	0.914141	0.182042	-0.129511	0.739827
1830	A0A8D1I2F1	LGALS3	Galectin OS=Sus scrofa OX=9823 GN=LGALS3 PE=1 SV=1	1.074	0.945	1.003	1.007	0.978	0.973	1.021	1.089	1.098	0.878	0.902	0.902	0.959	0.957	1.026	1.044	0.892	1.01	1.023	0.938	0.964	0.915	0.956	1.079	0.977	0.988	1.102	9	9	9	1.02751	0.340183	0.0391533	0.468288	0.958399	0.18214	-0.0613023	0.739596
1159	A0A287BRL8	MARCKS	Myristoylated alanine-rich C-kinase substrate OS=Sus scrofa OX=9823 GN=MARCKS PE=1 SV=1	1.289	0.858	0.798	0.82	0.952	0.948	1.092	0.539	0.569	1.096	1.273	0.956	1.192	1.23	1.073	1.378	1.065	0.986	0.979	0.97	1.135	1.224	0.724	0.925	0.979	1.277	1.117	9	9	9	0.84298	0.114296	-0.24643	0.941967	1.0985	0.182415	0.135534	0.738939
2375	A0A5G2Q7V8	DIP2B	Disco interacting B OS=Sus scrofa OX=9823 GN=DIP2B PE=1 SV=1	1.034	1.07	1.093	1.056	1.129	0.751	1.071	1.155	1.175	1.019	1.179	1.009	1.034	0.713	0.996	0.964	1.05	0.986	1.107	1.105	1.058	1.048	1.046	1.065	1.006	0.982	1.089	9	9	9	1.00295	0.944935	0.00424322	0.0245981	0.941511	0.18307	-0.0869507	0.737382
1243	A0A287AM09	CTBP1	C-terminal binding protein 1 OS=Sus scrofa OX=9823 GN=CTBP1 PE=3 SV=2	1.04	1.124	1.065	1.122	0.964	1.059	1.122	1.165	1.212	1.028	1.008	0.919	0.918	0.916	0.969	1.063	1.047	1.081	0.968	1.045	0.974	0.864	1.239	1.13	1.06	1.098	1.106	9	9	9	1.04102	0.340024	0.0579929	0.46849	0.943589	0.18377	-0.0837692	0.735724
3022	A0A287ADL4	PIGR	Polymeric immunoglobulin receptor OS=Sus scrofa OX=9823 GN=PIGR PE=1 SV=1	0.958	1.071	0.949	0.984	0.996	1.006	1.025	0.72	0.697	1.182	1.018	1.009	1.119	1.153	1.044	1.123	1.134	1.026	0.911	0.907	1.004	1.186	0.883	1.092	1.015	0.909	1.262	9	9	9	0.916785	0.199314	-0.125345	0.700461	1.06969	0.183832	0.0971946	0.735578
2352	A0A287A000	SH3KBP1	SH3 domain containing kinase binding protein 1 OS=Sus scrofa OX=9823 GN=SH3KBP1 PE=1 SV=3	0.927	0.969	0.932	1.04	1.005	1.031	1.047	1.101	1.193	0.968	0.932	0.934	0.919	0.935	0.965	0.826	0.956	0.896	0.85	0.997	1.008	0.937	0.977	0.88	1.182	0.891	1.113	9	9	9	1.04641	0.33828	0.0654432	0.470724	0.942954	0.183856	-0.0847405	0.735522
841	Q06AS6	GNAI2	Guanine nucleotide-binding protein G(i) subunit alpha-2 OS=Sus scrofa OX=9823 GN=GNAI2 PE=1 SV=1	1.026	0.914	0.903	1.089	1.021	1.002	0.961	0.947	1.012	1.08	0.916	1.039	0.91	0.865	0.992	0.984	0.981	0.885	0.971	1.02	0.959	0.965	1.005	1.069	0.994	1.042	0.972	9	9	9	0.98644	0.575119	-0.0196969	0.240242	0.961654	0.183918	-0.0564104	0.735377
2579	A0A4X1VZ89	HP1BP3	Heterochromatin protein 1-binding protein 3 OS=Sus scrofa OX=9823 GN=HP1BP3 PE=1 SV=1	1.165	1.015	1.067	1.029	1.084	0.934	1.027	0.849	0.883	1.123	1.044	1.107	1.078	0.974	1.06	0.981	0.923	1.017	0.982	0.975	1.047	1.015	1.046	0.926	1.024	1.055	0.762	9	9	9	1.02502	0.597056	0.0356558	0.223985	1.05378	0.184024	0.075576	0.735125
2891	A0A287BLF6	Sushi domain-containing protein OS=Sus scrofa OX=9823 PE=1 SV=2	Sushi domain-containing protein OS=Sus scrofa OX=9823 PE=1 SV=2	1.138	1.004	1.05	1.27	1.163	1.09	1.15	1.237	1.126	1.051	0.947	0.858	1.036	0.882	1.002	0.864	1.113	0.96	1.005	1.019	0.927	1.043	1.23	1.012	1.023	1.076	0.913	9	9	9	1.10597	0.0184291	0.145311	1.7345	0.94215	0.184327	-0.0859719	0.734411
1176	A0A287AYZ0	STRN3	Striatin 3 OS=Sus scrofa OX=9823 GN=STRN3 PE=1 SV=1	0.963	1.134	1.266	1.034	1.107	0.769	0.982	1.109	1.156	0.864	0.851	1.034	0.802	0.752	0.821	0.976	0.991	0.936	1.047	1.026	1.036	0.773	0.901	0.975	0.999	0.974	0.852	9	9	9	1.10917	0.0882891	0.14948	1.05409	0.935221	0.185528	-0.0966211	0.73159
969	A0A287BFS1	ECI1	Enoyl-CoA delta isomerase 1 OS=Sus scrofa OX=9823 GN=ECI1 PE=1 SV=2	0.838	1.136	0.969	1.179	1.086	1.188	1.013	1.17	1.016	1.096	0.908	1.148	1.15	1.071	1.04	3.099	1.354	1.079	0.712	1.014	1.05	0.907	0.924	1.06	1.075	1.053	1.181	9	9	9	1.06896	0.265313	0.0962101	0.576241	1.33077	0.185565	0.412262	0.731505
1697	F1RWM5	ERBB2	Receptor protein-tyrosine kinase OS=Sus scrofa OX=9823 GN=ERBB2 PE=3 SV=4	1.023	0.899	0.894	0.903	0.824	1.043	0.968	1.017	1.045	1.038	0.753	0.849	0.773	0.995	0.828	1.109	0.911	1.293	1.081	0.9	0.988	0.983	1.092	1.139	1.064	1.157	0.973	9	9	9	0.918844	0.0457358	-0.122108	1.33974	0.911699	0.185797	-0.133371	0.730962
277	A0A287B401	RBM14	RNA binding motif protein 14 OS=Sus scrofa OX=9823 GN=RBM14 PE=1 SV=1	1.011	0.997	0.931	1.059	0.968	0.879	1.01	0.956	0.993	1.059	0.987	0.971	1.024	0.908	1.022	0.985	0.993	0.915	0.994	0.994	1.062	0.942	1.133	1.194	0.929	1.011	1.021	9	9	9	0.948707	0.13931	-0.0759657	0.856019	0.955172	0.186647	-0.0661669	0.72898
1401	F1SG40	WASHC4	WASH complex subunit 4 OS=Sus scrofa OX=9823 GN=WASHC4 PE=1 SV=4	0.938	1.051	1.22	1.497	1.17	0.889	0.946	1.316	1.304	0.785	0.904	1.055	0.949	0.759	0.89	0.871	0.94	1.03	0.956	0.869	0.984	0.96	0.948	1.139	0.872	0.896	1.519	9	9	9	1.12994	0.192817	0.17624	0.714854	0.895002	0.186652	-0.160038	0.728968
138	F1RSZ8	ENPP6	glycerophosphocholine cholinephosphodiesterase OS=Sus scrofa OX=9823 GN=ENPP6 PE=1 SV=3	1.073	1.143	1.064	1.068	0.976	0.936	0.842	0.935	0.98	1.014	0.977	1.165	1.042	0.988	1.011	0.874	0.98	0.926	0.915	0.938	1.061	0.935	0.949	0.823	0.829	1.03	1.019	9	9	9	1.06095	0.185181	0.0853544	0.732404	1.05624	0.18773	0.0789403	0.726466
122	F1RPH0	1	Phosphoglycerate kinase OS=Sus scrofa OX=9823 GN=PGK1 PE=1 SV=3	0.952	1.113	1.111	1.023	1.206	0.945	1.043	1.018	1.008	0.987	0.89	0.998	1.086	1.069	0.962	0.962	0.961	1.055	0.958	0.91	0.998	0.884	0.926	0.879	1.092	1.042	0.862	9	9	9	1.10151	0.0233084	0.139481	1.63249	1.049	0.187857	0.0690148	0.726174
1551	A0A287ABU0	CCDC9	Coiled-coil domain containing 9 OS=Sus scrofa OX=9823 GN=CCDC9 PE=4 SV=1	1.007	0.967	0.959	0.977	0.968	0.891	1.066	0.949	0.921	0.985	1.01	0.97	1	0.91	1.015	1.02	1.075	0.966	1.056	1.051	1.006	0.969	0.959	1.143	0.966	1	1.201	9	9	9	0.930916	0.0463791	-0.103276	1.33368	0.957224	0.188046	-0.0630718	0.725735
266	I3LRS5	ALDH1A1	aldehyde dehydrogenase (NAD(+)) OS=Sus scrofa OX=9823 GN=ALDH1A1 PE=1 SV=2	1.041	1.038	0.969	0.926	1.123	1.262	0.992	1.085	1.034	0.945	0.895	0.861	1.038	1.176	0.978	1.11	1.074	1.018	0.926	0.917	0.958	0.943	0.984	0.845	1.132	1.018	0.787	9	9	9	1.11281	0.0354909	0.154205	1.44988	1.06874	0.188582	0.0959145	0.7245
824	A0A286ZSI8	WDR76	WD repeat-containing protein 76 OS=Sus scrofa OX=9823 GN=WDR76 PE=3 SV=3	1.089	1.14	1.162	1.052	1.045	0.99	1.238	1.321	1.334	1.175	0.999	0.96	0.955	0.83	1.016	0.894	1.084	1.152	1.084	1.124	1.003	1.006	1.207	1.31	1.078	1.105	0.857	9	9	9	1.06108	0.280055	0.085534	0.552757	0.927461	0.18871	-0.108642	0.724204
73	B8YGC1	REG3G	Regenerating islet-derived 3 gamma OS=Sus scrofa OX=9823 GN=REG3G PE=2 SV=1	1.034	0.796	0.763	1.158	1.076	0.881	1.038	0.82	0.792	0.907	1.001	0.812	1.104	1.376	1.223	1.029	1.076	1.039	1.003	1.121	1.017	1.328	1.167	1.239	1.336	0.958	1.313	9	9	9	0.797367	0.00382832	-0.326684	2.41699	0.912707	0.188736	-0.131776	0.724146
803	F1RZS8	DAXX	Death domain-associated protein 6 OS=Sus scrofa OX=9823 GN=DAXX PE=3 SV=4	0.841	0.906	0.856	0.846	0.871	0.657	0.998	1.01	0.992	0.795	0.758	1.014	0.73	0.539	0.744	0.978	0.875	0.803	1.061	0.782	0.776	0.785	0.971	0.786	0.948	0.893	0.968	9	9	9	1.00088	0.988055	0.00126655	0.00521904	0.907905	0.188824	-0.139387	0.723942
2718	A0A286ZLB1	TRAP1	TNF receptor associated protein 1 OS=Sus scrofa OX=9823 GN=TRAP1 PE=1 SV=2	1.149	1.05	1.023	1.019	0.892	0.911	0.99	0.886	0.922	0.928	0.966	1.026	0.946	0.954	1.065	1.062	0.998	0.979	1.055	1.011	1.098	0.961	1.005	1.068	0.972	1.027	1.003	9	9	9	0.961087	0.249113	-0.0572611	0.603604	0.97	0.188905	-0.0439433	0.723756
892	F1SR05	LDHB	L-lactate dehydrogenase OS=Sus scrofa OX=9823 GN=LDHB PE=1 SV=3	1.069	1.158	1.167	0.987	1.049	1.072	1.257	1.01	0.999	0.965	0.97	0.957	1.012	1.061	0.981	1.074	1.007	1.102	0.929	0.906	0.982	1.005	0.926	0.779	1.075	1.133	0.907	9	9	9	1.13029	0.0152935	0.176698	1.81549	1.05635	0.188966	0.0790916	0.723617
244	F1SB18	PRPSAP2	Phosphoribosyl pyrophosphate synthase-associated protein 2 OS=Sus scrofa OX=9823 GN=PRPSAP2 PE=1 SV=3	1.08	0.976	0.902	0.944	0.917	0.649	0.964	0.8	0.673	1.036	1.045	1.027	1.126	0.77	0.864	0.776	0.864	0.867	1.108	0.976	1.097	0.871	1.103	1.134	0.801	0.872	1.205	9	9	9	0.862332	0.0537497	-0.213684	1.26962	0.913603	0.189045	-0.13036	0.723435
1932	K7GLB8	TAB1	TGF-beta activated kinase 1 (MAP3K7) binding protein 1 OS=Sus scrofa OX=9823 GN=TAB1 PE=1 SV=2	1.008	1.166	1.117	1.003	1.09	0.981	1.034	0.984	0.962	1.007	0.844	1.01	1.07	0.957	0.966	0.87	0.983	0.946	0.961	1.035	1.057	1.147	1.131	1.012	0.912	0.946	0.914	9	9	9	1.02523	0.505058	0.035952	0.296659	0.949314	0.189543	-0.0750423	0.722292
744	Q68RU1	ApoN	Apolipoprotein F OS=Sus scrofa OX=9823 GN=ApoN PE=1 SV=1	1.194	0.955	1.054	1.133	0.948	0.925	1.063	0.924	1.027	1.208	1.304	1.039	1.089	1.164	1.233	1.199	1.03	1.059	1.19	1.115	1.166	1.11	0.926	1.1	1.115	1.113	0.945	9	9	9	0.943047	0.178779	-0.0845984	0.747682	1.05573	0.190322	0.0782354	0.72051
236	F1RLZ7	DPYSL3	Dihydropyrimidinase like 3 OS=Sus scrofa OX=9823 GN=DPYSL3 PE=1 SV=4	0.958	1.078	1.195	1.069	0.962	0.939	1.003	1	0.893	0.984	1.138	0.962	0.981	1.022	1.059	1.05	1.041	1.077	1.009	1.033	0.957	0.983	0.784	0.908	1.033	0.975	1.155	9	9	9	1.02942	0.532323	0.0418342	0.273825	1.05398	0.190508	0.0758442	0.720088
1081	A0A287AF08	SELENOH	Selenoprotein H OS=Sus scrofa OX=9823 GN=SELENOH PE=1 SV=1	1.112	1.016	0.979	1.078	1.061	0.871	1.128	1.26	1.224	1.047	1.037	0.939	1.163	0.817	0.935	0.973	1.007	1.127	1.129	1.113	0.938	0.802	1.218	1.537	0.984	1.024	1.31	9	9	9	0.967578	0.670157	-0.0475497	0.173824	0.899552	0.191067	-0.152721	0.718813
884	A0A5G2QJ39	LOC100624891	UDP-glycosyltransferases domain-containing protein OS=Sus scrofa OX=9823 GN=LOC100624891 PE=3 SV=1	0.991	0.757	0.896	0.814	0.702	1.025	1.074	1.095	1.109	0.915	0.999	0.791	0.981	1.084	0.719	1.006	1.014	1.031	0.9	1.151	1.014	0.849	1.097	1.196	1.031	0.949	1.027	9	9	9	0.918494	0.20952	-0.122658	0.678776	0.92685	0.192236	-0.109592	0.716165
2266	A0A4X1VIP2	SYNCRIP	Synaptotagmin binding cytoplasmic RNA interacting protein OS=Sus scrofa OX=9823 GN=SYNCRIP PE=1 SV=1	0.982	1.109	1.14	0.994	1.1	1.088	0.932	1.073	0.994	0.944	0.911	0.946	1.055	1.025	0.875	0.919	0.912	0.876	1.021	0.938	0.956	0.889	1.116	0.904	1.045	0.936	1.071	9	9	9	1.06039	0.11425	0.0845917	0.942143	0.95347	0.192703	-0.0687405	0.715112
2684	F1RZZ1	TBCD	Tubulin-specific chaperone D OS=Sus scrofa OX=9823 GN=TBCD PE=1 SV=4	1.01	0.933	0.892	1.056	0.993	0.951	1.024	0.992	1.016	1.067	0.855	0.929	0.956	0.967	1.018	1.03	1.008	0.939	0.961	1.102	0.946	0.879	1.025	1.193	1.018	0.997	1.13	9	9	9	0.958491	0.270822	-0.0611632	0.567316	0.947898	0.193109	-0.077197	0.714198
2871	F2Z5V2	SNRPG	Small nuclear ribonucleoprotein G OS=Sus scrofa OX=9823 GN=SNRPG PE=1 SV=1	1.095	1.196	1.155	1.084	1.008	0.789	0.964	1.113	1.057	1.078	0.936	1.021	0.878	0.563	0.85	0.776	0.908	0.856	1.16	0.866	0.991	0.998	1.178	1.026	0.901	0.765	0.82	9	9	9	1.08685	0.197696	0.120148	0.704003	0.903619	0.193287	-0.146214	0.713797
197	A0A5G2QTZ9	POLR2E	DNA-directed RNA polymerase II subunit E OS=Sus scrofa OX=9823 GN=POLR2E PE=3 SV=2	1.115	0.925	1	0.87	0.752	0.775	0.997	1.067	0.919	0.999	0.84	1.112	1.039	0.754	0.858	0.826	0.952	0.875	1.052	0.955	1.04	0.892	1.088	0.903	0.868	0.89	1.405	9	9	9	0.925987	0.300371	-0.110936	0.522342	0.907841	0.193306	-0.139488	0.713754
877	A0A5G2RDD7	P4HB	Protein disulfide-isomerase OS=Sus scrofa OX=9823 GN=P4HB PE=3 SV=2	1.06	0.968	1.009	0.922	1.048	1.005	1.006	0.988	0.971	0.998	1.012	0.985	1.051	1.006	0.947	0.986	0.976	0.999	1.016	0.92	1.001	0.99	0.886	0.82	1.094	0.996	0.838	9	9	9	1.04859	0.192138	0.0684541	0.716387	1.04661	0.193311	0.0657194	0.713745
216	F1SAQ3	CCNK	Cyclin K OS=Sus scrofa OX=9823 GN=CCNK PE=3 SV=3	0.983	1.052	1.1	1.054	1.015	1.091	0.805	0.906	0.883	0.995	0.842	0.914	0.906	1.061	1.093	0.853	0.881	0.928	0.917	1.048	0.977	0.946	0.996	1.235	0.9	0.88	1.24	9	9	9	0.972645	0.631249	-0.0400152	0.1998	0.927126	0.193882	-0.109163	0.712462
718	A0A480Y2Z4	MPPE1	Metallophosphoesterase 1 OS=Sus scrofa OX=9823 GN=MPPE1 PE=3 SV=1	1.067	0.981	1.001	1.612	1.548	1.369	1.333	1.378	1.4	0.964	0.889	1.027	1.272	1.15	1.257	1.006	1.258	1.101	0.916	0.971	0.932	1.383	1.914	1.514	1.204	1.253	1.289	9	9	9	1.02751	0.795278	0.0391581	0.099481	0.872363	0.194068	-0.197	0.712046
1092	A0A8D1UKC8	ORC6	Origin recognition complex subunit 6 OS=Sus scrofa OX=9823 GN=ORC6 PE=3 SV=1	0.947	0.981	0.992	1.198	0.972	1.071	1.138	1.231	1.257	1.016	0.706	0.908	0.923	0.883	0.907	0.947	1.202	1.155	0.876	1.096	0.914	0.9	1.008	1.333	1.056	1.124	1.2	9	9	9	1.02945	0.637094	0.0418765	0.195796	0.90954	0.195447	-0.13679	0.70897
795	Q6YT39	LTF	Lactotransferrin OS=Sus scrofa OX=9823 GN=LTF PE=1 SV=1	0.921	0.967	0.875	1.393	0.87	0.868	1.007	1.041	1.066	0.987	0.775	0.975	0.84	1.09	1.084	1.665	1.349	0.963	0.732	0.949	0.934	0.91	0.918	0.983	1.171	0.972	0.934	9	9	9	1.05939	0.413049	0.0832349	0.383998	1.14407	0.195675	0.194171	0.708464
310	A0A286ZWU9	MLEC	Malectin OS=Sus scrofa OX=9823 GN=MLEC PE=1 SV=1	1.009	0.975	0.945	1.088	1.05	0.899	1.07	1.064	1.096	1.038	0.934	0.919	0.955	0.894	1.012	0.963	0.996	0.918	1.068	0.93	1.015	1.135	0.971	0.974	0.952	0.97	0.947	9	9	9	1.02611	0.427631	0.0371857	0.368931	0.962843	0.196967	-0.0546273	0.705607
961	F1RPY3	RTN3	Reticulon OS=Sus scrofa OX=9823 GN=RTN3 PE=1 SV=3	1.196	1.315	1.308	1.023	1.116	0.985	0.985	1.016	1.038	0.983	0.98	1.019	1.043	0.901	1.108	1.11	0.966	0.86	0.999	1.013	1.195	0.907	1.072	1.058	1.017	1.054	1.769	9	9	9	0.989885	0.907783	-0.0146672	0.0420178	0.889528	0.197473	-0.168888	0.704493
447	A0A8W4FL59	C1S	Complement C1s OS=Sus scrofa OX=9823 GN=C1S PE=4 SV=1	0.986	0.97	1.062	0.924	0.779	1.014	1.079	1.163	1.215	0.938	0.875	0.861	0.922	1.077	1.04	1.05	1.004	0.995	0.912	0.992	0.904	0.937	0.741	0.887	1.002	0.978	0.96	9	9	9	1.10574	0.0758447	0.14501	1.12007	1.05401	0.197561	0.075891	0.704299
1079	A5D9K6	BRD2	Bromodomain-containing protein 2 OS=Sus scrofa OX=9823 GN=BRD2 PE=3 SV=1	1.113	1.208	1.065	1.212	1.193	0.956	0.978	0.761	0.529	0.996	0.873	0.98	1.041	0.723	0.908	1.05	0.939	0.734	1.02	0.982	1.009	0.832	1.233	1.176	0.93	0.838	0.957	9	9	9	1.00423	0.962909	0.0060941	0.0164148	0.918347	0.197718	-0.122889	0.703954
192	A0A075B7I5	Ig-like domain-containing protein OS=Sus scrofa OX=9823 PE=1 SV=4	Ig-like domain-containing protein OS=Sus scrofa OX=9823 PE=1 SV=4	0.985	0.804	0.958	1.473	1.726	1.28	0.753	1.106	1.238	0.662	0.953	0.67	1.079	1.044	1.142	1.125	0.744	1.14	1.259	0.919	0.886	0.814	1.111	1.381	0.859	1.354	1.19	9	9	9	1.05628	0.642764	0.0789889	0.191948	0.87578	0.198184	-0.191359	0.702932
140	A0A5G2R5L9	CD47	Leukocyte surface antigen CD47 OS=Sus scrofa OX=9823 GN=CD47 PE=4 SV=2	1.081	1.003	0.999	1.031	1.091	1.082	1.164	1.023	1.042	1.018	0.898	0.992	1.059	1.193	1.185	1.056	1.093	1.126	0.944	1.082	1.032	0.984	0.901	1.037	1.02	1.119	1.035	9	9	9	1.03955	0.175227	0.055953	0.756399	1.05091	0.198325	0.0716346	0.702622
3016	A0A286ZT34	BZW2	eIF5-mimic protein 1 OS=Sus scrofa OX=9823 GN=BZW2 PE=1 SV=1	1.068	1.053	1.079	0.97	0.946	0.927	1.02	1.142	1.187	0.956	0.851	0.94	0.916	0.858	0.927	1.002	0.978	0.921	0.973	0.942	0.963	0.819	1.082	0.98	1.01	0.971	0.953	9	9	9	1.08041	0.0537297	0.111578	1.26979	0.960428	0.198465	-0.0582507	0.702316
2789	A0A5G2QZG3	LOC100525572	Ig-like domain-containing protein OS=Sus scrofa OX=9823 GN=LOC100525572 PE=1 SV=2	1.095	1.013	0.917	1.476	1.157	0.972	0.85	0.654	0.733	0.977	1.187	0.996	1.089	1.025	1.443	1.534	0.966	0.805	1.14	1.074	1	0.726	0.812	1.149	1.075	0.959	0.963	9	9	9	0.996516	0.971522	-0.00503502	0.0125472	1.12632	0.198915	0.171617	0.701333
370	I3LAY6	NEXN	Far upstream element-binding protein 1 isoform X9 OS=Sus scrofa OX=9823 GN=NEXN PE=1 SV=2	1.05	1.063	1.155	0.97	1.037	1.065	1.025	1.139	1.261	1.065	0.961	1.024	1.02	1.202	1.09	1.038	1.045	0.999	0.948	1.171	0.965	0.914	0.784	1.025	1.118	1.013	0.971	9	9	9	1.09608	0.063264	0.132357	1.19884	1.06005	0.198959	0.0841345	0.701236
678	A0A287AQ67	RPS29	Small ribosomal subunit protein uS14 OS=Sus scrofa OX=9823 GN=RPS29 PE=3 SV=1	0.834	1.153	1.21	1.144	1.04	0.754	1.065	1.291	1.056	0.784	0.775	1.145	1.107	0.671	0.835	0.784	0.797	0.975	1.217	0.773	1.039	0.843	1.385	1.06	0.87	0.785	0.96	9	9	9	1.06885	0.456938	0.0960642	0.340142	0.881438	0.199277	-0.18207	0.700544
584	A0A5K1UZA2	FCN2	Ficolin (collagen/fibrinogen domain containing lectin) 2 (hucolin) OS=Sus scrofa OX=9823 GN=FCN2 PE=1 SV=1	0.906	0.977	0.993	0.8	0.766	0.76	0.942	0.835	0.96	0.947	1.144	0.761	1.252	1.781	0.959	0.907	1.258	0.978	0.979	1.17	0.923	0.975	0.637	0.832	1.122	0.997	0.972	9	9	9	0.922389	0.241372	-0.116553	0.617312	1.16033	0.19937	0.214541	0.70034
792	A0A287AMJ0	RIGI	RNA helicase OS=Sus scrofa OX=9823 GN=RIGI PE=3 SV=2	0.963	0.944	1.055	1.133	1.228	1.087	1.046	1.324	1.169	0.98	0.915	0.983	0.99	1.009	1.029	0.972	1.034	1.029	1.026	1.053	0.969	0.997	1.14	0.978	0.984	0.966	1.213	9	9	9	1.0668	0.187214	0.0932931	0.727662	0.958718	0.200044	-0.0608222	0.698874
1903	A0A5G2QZA1	YWHAQ	14-3-3 protein theta OS=Sus scrofa OX=9823 GN=YWHAQ PE=1 SV=1	1.019	0.894	1.054	0.988	0.97	1.092	1.068	0.879	0.925	1.015	0.955	0.981	0.962	1.098	1.177	1.071	0.986	0.972	0.897	1.077	0.853	0.934	0.945	0.896	1.159	1.038	0.91	9	9	9	1.02067	0.643778	0.0295141	0.191264	1.05833	0.200073	0.0817902	0.698812
3010	A0A287B1Z2	RGS19	Regulator of G protein signaling 19 OS=Sus scrofa OX=9823 GN=RGS19 PE=4 SV=2	0.997	1.06	1.082	1.03	1.006	1.083	1.153	1.169	1.083	1.011	0.993	0.937	0.96	0.954	0.976	0.962	1.074	1.314	0.899	0.886	0.925	0.946	1.094	0.951	1.078	1.002	0.795	9	9	9	1.12675	0.0060406	0.172166	2.21892	1.07055	0.200088	0.0983464	0.69878
218	A0A287B771	RPS4X	40S ribosomal protein S4 OS=Sus scrofa OX=9823 GN=RPS4X PE=1 SV=2	1.042	1.02	1.033	0.966	1.015	0.838	1.038	1.069	1.062	0.998	0.901	0.922	1.013	0.775	0.822	0.916	0.976	1.027	1.01	0.964	1.024	0.896	1.085	0.921	0.964	0.947	0.957	9	9	9	1.03593	0.26673	0.0509211	0.573929	0.952327	0.200571	-0.0704716	0.697732
928	K7GM40	APOA1	Apolipoprotein A-I OS=Sus scrofa OX=9823 GN=APOA1 PE=3 SV=2	0.95	0.829	0.849	0.877	0.874	1.066	1.069	0.823	0.977	1.048	1.07	0.972	1.135	1.369	1.098	1.189	1.006	0.948	0.85	0.824	0.975	1.362	0.931	0.96	1.085	1.117	0.879	9	9	9	0.925526	0.271633	-0.111655	0.566017	1.09485	0.200606	0.130728	0.697657
745	A1YIZ1	SEPHS2	Selenide, water dikinase 2 OS=Sus scrofa OX=9823 GN=SEPHS2 PE=2 SV=2	1.034	0.879	0.931	0.92	0.929	0.969	1.046	1.114	1.224	1.023	0.93	0.841	1.026	0.954	0.939	1.014	0.963	0.987	1.053	1.167	0.939	0.923	0.875	1.236	0.966	0.983	1.075	9	9	9	0.981447	0.730526	-0.0270173	0.136364	0.941413	0.200669	-0.0871009	0.697519
402	P11607	ATP2A2	Sarcoplasmic/endoplasmic reticulum calcium ATPase 2 OS=Sus scrofa OX=9823 GN=ATP2A2 PE=1 SV=1	1.033	0.979	0.98	0.936	1.054	0.958	1.032	1.04	1.105	1.067	1.073	1.053	1.143	1.046	1.023	1.03	1.04	1.074	1.05	1.031	1.071	0.925	0.933	1.181	1.006	1.057	0.916	9	9	9	0.99422	0.863535	-0.00836256	0.06372	1.04133	0.200813	0.0584279	0.697208
1490	A0A4X1TLK4	SPON1	Spondin-1 OS=Sus scrofa OX=9823 GN=SPON1 PE=1 SV=1	0.833	0.893	1.047	1.048	0.88	0.781	1.105	0.894	0.863	1.004	1.062	0.98	1.106	0.962	1.314	1.119	0.965	0.873	0.994	1.094	0.806	0.848	0.706	1.21	0.938	0.916	1.064	9	9	9	0.972948	0.692843	-0.0395657	0.159365	1.09433	0.200843	0.130052	0.697144
79	A0A287BLL9	ARID1A	AT-rich interaction domain 1A OS=Sus scrofa OX=9823 GN=ARID1A PE=1 SV=2	1.145	1.163	1.058	1.068	1.021	1.275	0.969	0.872	0.817	1.112	0.961	0.989	0.884	1.175	1.007	0.917	0.866	0.887	1.06	1.115	1.04	1.204	1.254	0.837	0.958	0.987	1.008	9	9	9	0.992074	0.898074	-0.0114798	0.0466877	0.929726	0.201239	-0.105122	0.696288
743	A0A286ZXJ1	COG5	Conserved oligomeric Golgi complex subunit 5 OS=Sus scrofa OX=9823 GN=COG5 PE=1 SV=1	1.019	0.983	0.874	1.105	1.123	1.123	0.972	1.146	1.228	1.093	0.86	0.867	0.997	0.82	1.086	0.997	1.006	1.032	0.957	0.963	0.969	0.906	1.16	1.444	1.025	1.097	1.011	9	9	9	1.0043	0.945625	0.00619216	0.0242812	0.9188	0.201475	-0.122178	0.695778
427	F1SUG4	ELOB	Elongin B OS=Sus scrofa OX=9823 GN=ELOB PE=1 SV=1	1.12	1.071	1.098	0.983	1.068	1.181	1.173	1.04	0.98	1.045	0.963	1.007	0.996	1.094	1.008	0.953	1.024	1.069	0.866	0.908	0.998	1.068	0.922	0.893	1.096	1.07	0.942	9	9	9	1.10852	0.0128632	0.148641	1.89065	1.04519	0.202664	0.0637652	0.693223
1285	A0A287AZ60	MTMR3	protein-tyrosine-phosphatase OS=Sus scrofa OX=9823 GN=MTMR3 PE=3 SV=1	1.112	1.122	1.178	1.031	1.049	1.078	1.014	1.126	1.069	1.069	1.017	1.013	0.939	0.896	1.005	1.011	0.951	0.927	1.021	1.071	1.077	0.978	1.147	1.077	0.943	0.878	1.029	9	9	9	1.06051	0.0757533	0.0847637	1.1206	0.95738	0.203886	-0.0628366	0.690613
708	A0A287BKG2	CHI3L1	Chitinase-3-like protein 1 OS=Sus scrofa OX=9823 GN=CHI3L1 PE=1 SV=2	1.398	1.036	1.146	1.864	1.198	1.035	0.969	1.153	1.139	1.116	0.931	1.299	1.105	1.03	1.473	1.17	1.065	1.127	0.856	0.976	0.962	0.812	1.442	1.025	1.096	1.152	1.029	9	9	9	1.16984	0.130236	0.226311	0.885269	1.10332	0.204801	0.141845	0.688667
54	F1RG60	SEPTIN1	Septin OS=Sus scrofa OX=9823 GN=SEPTIN1 PE=1 SV=1	1.146	0.996	1.041	0.94	0.853	0.984	1.09	0.994	0.814	1.086	0.917	1.097	0.938	0.855	0.881	0.965	1.026	0.988	1.041	1.032	1.162	0.819	0.997	1.097	0.951	0.997	1.273	9	9	9	0.945458	0.322241	-0.0809141	0.491819	0.934251	0.205263	-0.0981175	0.687689
119	I3LMH3	INTS5	Integrator complex subunit 5 OS=Sus scrofa OX=9823 GN=INTS5 PE=1 SV=3	1.083	1.122	1.101	1.159	0.969	0.941	0.862	0.866	1.088	0.92	0.772	0.894	1.013	0.916	1.108	0.813	0.791	0.846	0.992	0.883	1.012	1.1	1.257	1.098	0.664	0.828	1.06	9	9	9	1.03339	0.641914	0.0473894	0.192523	0.907691	0.20635	-0.139728	0.685395
33	A0A287AKR8	LAGE3	L antigen family member 3 OS=Sus scrofa OX=9823 GN=LAGE3 PE=1 SV=2	1.102	1.182	1.199	1.033	0.984	0.984	1.057	1.068	1.116	1.053	0.962	1.027	1	0.964	0.976	1.113	1.02	0.966	1.05	1.067	1.087	1.039	1.077	0.921	0.982	1.056	1.104	9	9	9	1.03645	0.254267	0.051649	0.59471	0.967814	0.206375	-0.0471981	0.685344
1669	A0A286ZMM6	CUL1	Cullin 1 OS=Sus scrofa OX=9823 GN=CUL1 PE=1 SV=1	1.068	0.917	0.976	0.82	0.883	0.68	1.006	0.99	0.962	0.971	0.95	0.995	1.07	0.831	0.893	0.983	1.055	0.981	1.036	1.049	1.02	0.808	1.331	1.078	1.044	1.084	0.915	9	9	9	0.886492	0.0704577	-0.17382	1.15207	0.932088	0.206487	-0.101463	0.685107
2114	A0A8W4FK58	SP140	SP140 nuclear body protein OS=Sus scrofa OX=9823 GN=SP140 PE=4 SV=1	0.907	0.955	1.009	0.949	1.045	0.627	1.135	1.21	1.056	0.952	0.968	0.935	1.193	0.656	0.894	0.887	0.956	0.961	0.984	1.141	0.938	0.865	1.078	1.076	0.969	0.89	1.144	9	9	9	0.978866	0.748412	-0.0308163	0.125859	0.924821	0.206673	-0.112754	0.684717
1804	A0A287BM53	RPL7A	60S ribosomal protein L7a OS=Sus scrofa OX=9823 GN=RPL7A PE=3 SV=2	1.046	1.103	1.192	1.095	1.187	1.001	1.043	1.1	1.04	1.011	0.976	0.981	1.144	1.083	1.036	0.996	1.073	0.912	1.065	1.04	1.065	1.192	1.11	1.056	1.052	0.971	1.024	9	9	9	1.02423	0.400853	0.0345394	0.397015	0.962089	0.206937	-0.0557581	0.684161
1287	I3LIB1	DDX27	RNA helicase OS=Sus scrofa OX=9823 GN=DDX27 PE=3 SV=2	1.084	0.982	0.917	1.016	0.886	1.007	1.082	1.19	1.216	1.105	0.868	0.925	0.861	0.886	0.935	1.095	0.972	1.208	1.026	1.104	0.96	0.901	1.083	1.184	0.963	1.103	1.147	9	9	9	0.990392	0.839514	-0.0139288	0.0759719	0.934959	0.206951	-0.0970245	0.684133
2144	A0A8W4F7Y4	MCM3AP	Minichromosome maintenance complex component 3 associated protein OS=Sus scrofa OX=9823 GN=MCM3AP PE=3 SV=1	0.988	1.191	1.203	1.095	1.315	1.098	1.052	1.036	1.06	1.028	1.154	1.034	1.153	0.818	1.177	0.954	0.986	0.888	1.111	1.107	1.126	1.028	1.393	1.147	0.924	0.923	1.181	9	9	9	1.00986	0.854902	0.0141541	0.0680836	0.924748	0.206959	-0.112867	0.684116
2914	Q8MIZ3	DCPS	m7GpppX diphosphatase OS=Sus scrofa OX=9823 GN=DCPS PE=2 SV=1	1.031	0.853	0.941	1.016	0.947	1.043	0.99	1.134	1.252	1.012	1.063	0.883	0.835	0.897	0.936	1.013	0.961	1.022	1.02	1.058	0.943	0.925	0.95	1.129	1.003	0.977	1.008	9	9	9	1.02152	0.633637	0.0307238	0.198159	0.956618	0.207065	-0.0639848	0.683893
398	A0A287AVS9	MRPS34	Mitochondrial ribosomal protein S34 OS=Sus scrofa OX=9823 GN=MRPS34 PE=1 SV=1	1.096	1.08	1.199	0.895	0.851	0.832	0.882	0.98	1.039	1.059	0.936	1.116	0.928	0.745	0.853	0.929	0.92	0.814	1.002	1.059	1.082	0.735	1.167	1.172	0.861	0.97	0.969	9	9	9	0.981923	0.77876	-0.0263181	0.108597	0.920484	0.207206	-0.119536	0.683597
2638	F1SLC4	ANXA4	Annexin OS=Sus scrofa OX=9823 GN=ANXA4 PE=3 SV=4	1.012	0.932	0.925	0.883	0.887	0.936	1.011	1.043	1.061	1.025	0.936	0.918	0.965	1.05	0.88	1.079	0.993	0.911	1.166	1.04	1.15	0.901	0.929	1.048	0.993	1.017	0.962	9	9	9	0.94395	0.148556	-0.0832183	0.828109	0.951227	0.207323	-0.0721377	0.683353
2252	F1RMV5	ETHE1	ETHE1 persulfide dioxygenase OS=Sus scrofa OX=9823 GN=ETHE1 PE=1 SV=4	1.011	0.904	0.906	1.102	0.938	0.938	0.972	1.011	1.067	0.947	0.824	0.876	0.958	0.947	1.039	1.069	0.958	0.931	0.936	1.05	1.032	0.875	0.954	1.024	1.065	0.949	1.057	9	9	9	0.9896	0.752618	-0.0150831	0.123425	0.95605	0.207751	-0.0648419	0.682458
1514	A0A287AGH0	RPL22L1	60S ribosomal protein L22-like 1 OS=Sus scrofa OX=9823 GN=RPL22L1 PE=1 SV=3	1.23	1.185	1.19	1.348	1.219	1.272	0.996	1.15	1.201	1.139	0.963	1.043	1.1	1.217	1.26	1.043	0.982	0.978	1.028	1.12	1.081	1.109	1.394	1.231	1.114	1.113	1.13	9	9	9	1.04564	0.289377	0.0643856	0.538536	0.942345	0.207979	-0.0856728	0.68198
31	F1S4Z9	SNTA1	Syntrophin alpha 1 OS=Sus scrofa OX=9823 GN=SNTA1 PE=1 SV=2	0.914	1.047	0.993	1.048	1.126	1.032	1.017	1.155	1.15	0.968	1.003	0.96	1.165	1.136	1.073	0.925	0.948	1.088	0.988	1.07	1.032	0.91	0.942	0.968	0.954	0.901	1.072	9	9	9	1.07299	0.0510549	0.101635	1.29196	1.04855	0.208767	0.06839	0.680339
144	F1SRP0	SMC2	Structural maintenance of chromosomes protein OS=Sus scrofa OX=9823 GN=SMC2 PE=3 SV=3	1.039	0.918	0.969	0.918	0.873	1.066	1.057	0.996	0.969	1.055	0.877	0.883	1.01	0.833	0.987	0.874	0.95	0.905	0.899	0.988	0.987	0.974	1.135	0.853	0.875	1.001	1.215	9	9	9	0.986334	0.770312	-0.0198524	0.113333	0.938053	0.209089	-0.0922585	0.67967
1213	A0A287AQS7	SCO2	Synthesis of cytochrome C oxidase 2 OS=Sus scrofa OX=9823 GN=SCO2 PE=1 SV=1	0.88	0.93	1.014	1.142	1.08	1.106	0.958	1.129	1.065	0.938	0.854	0.92	1.166	0.995	1.059	0.894	0.972	0.8	1.022	0.949	1.011	1.023	1.281	1.309	0.908	0.826	1.033	9	9	9	0.993805	0.918272	-0.00896567	0.0370285	0.918394	0.209411	-0.122816	0.679001
2371	F1RT28	SEC63	SEC63 homolog, protein translocation regulator OS=Sus scrofa OX=9823 GN=SEC63 PE=1 SV=3	0.976	0.891	0.972	0.943	0.894	0.858	1.024	1.078	1.151	1.123	0.918	1.039	1.03	0.971	1.059	1.09	1.041	1.049	1.101	1.036	1.036	0.759	0.873	1.008	0.966	1.06	0.999	9	9	9	0.994229	0.906185	-0.00834924	0.0427831	1.05454	0.209626	0.07661	0.678556
299	F1S614	STRIP1	Striatin-interacting protein 1 OS=Sus scrofa OX=9823 GN=STRIP1 PE=1 SV=2	0.854	0.955	1.055	1.049	1.008	1.128	0.929	1.117	1.029	0.886	0.858	0.843	0.921	1.117	0.993	1.041	1.015	1	0.846	0.973	0.886	0.975	0.962	0.938	0.94	0.889	0.847	9	9	9	1.10514	0.0146433	0.144223	1.83436	1.05063	0.210239	0.0712545	0.677287
327	A0A480KJB8	MDH2	Malate dehydrogenase OS=Sus scrofa OX=9823 GN=MDH2 PE=3 SV=1	1.075	1.002	1.044	0.969	0.998	1.158	1.053	1.015	1.07	1.14	1.001	0.977	1.004	1.083	0.988	1.001	0.969	1.052	1.12	0.963	1.077	0.935	0.968	0.897	1.006	0.953	0.938	9	9	9	1.0595	0.0728996	0.0833849	1.13727	1.04042	0.211943	0.057166	0.67378
507	F1RT96	ACSF2	Medium-chain acyl-CoA ligase ACSF2, mitochondrial OS=Sus scrofa OX=9823 GN=ACSF2 PE=1 SV=3	0.908	1.009	0.961	1.111	0.892	0.825	0.958	0.95	0.874	0.955	1.001	0.928	1.068	0.797	0.847	0.881	0.929	0.984	0.853	0.979	1.011	1.008	1.041	1.039	0.943	1.141	0.856	9	9	9	0.956826	0.31892	-0.0636721	0.496319	0.945778	0.21281	-0.0804259	0.672008
2578	A0A5G2RE71	ACTR2	Actin-related protein 2 OS=Sus scrofa OX=9823 GN=ACTR2 PE=3 SV=2	1.174	0.976	0.957	0.925	0.985	1.001	1.049	0.971	0.969	1.189	0.967	1.048	0.97	1.049	0.987	0.988	0.975	0.978	1.073	0.95	1.127	0.896	0.823	0.966	0.968	0.975	0.924	9	9	9	1.03505	0.394124	0.0496996	0.404367	1.0516	0.213079	0.0725824	0.67146
59	A0A8W4FQ04	FTL	Ferritin OS=Sus scrofa OX=9823 GN=FTL PE=1 SV=1	1.16	0.913	0.919	1.089	0.91	0.945	0.909	0.975	1.091	0.953	0.944	1.039	0.855	0.938	1.095	1.069	0.992	1.029	1.023	0.978	1.022	1.125	0.925	1.108	1.105	0.93	1.133	9	9	9	0.95315	0.268584	-0.0692247	0.57092	0.953471	0.213401	-0.0687391	0.670803
1387	A0A286ZXD9	MAP4	Microtubule-associated protein OS=Sus scrofa OX=9823 GN=MAP4 PE=1 SV=3	1.009	0.952	0.911	0.952	0.997	1.005	0.968	0.798	0.911	1.018	1.023	0.906	1.097	1.174	1.072	1.032	0.972	0.909	0.987	0.995	1.012	1.055	0.861	0.904	0.974	1.055	0.938	9	9	9	0.968341	0.333446	-0.0464133	0.476975	1.04806	0.214587	0.067719	0.668396
1680	I3L7Z3	NUDCD1	NudC domain-containing protein 1 OS=Sus scrofa OX=9823 GN=NUDCD1 PE=1 SV=2	1.024	1.29	1.092	1.034	0.972	0.903	1.015	0.845	0.789	1.126	1.026	1.203	0.969	0.968	1.056	0.978	1.022	0.841	1.005	1.087	1.114	0.867	0.841	0.952	0.874	0.981	0.921	9	9	9	1.03726	0.551412	0.0527774	0.258523	1.0633	0.214704	0.0885426	0.66816
2057	Q711S8	SPP2	Secreted phosphoprotein 24 OS=Sus scrofa OX=9823 GN=SPP2 PE=2 SV=1	0.845	1.149	1.033	1.08	0.963	1.249	1.07	1.111	1.082	1.01	0.716	0.837	0.993	0.951	1.025	0.924	1.007	0.884	0.926	0.873	1.027	1.125	1.055	1.015	0.896	1.013	0.926	9	9	9	1.08198	0.106864	0.113672	0.971168	0.942525	0.214934	-0.0853975	0.667695
768	A0A287BMK7	SNX2	Sorting nexin-2 OS=Sus scrofa OX=9823 GN=SNX2 PE=3 SV=3	1.015	0.937	0.931	1.103	0.974	1.052	0.987	1.004	1.03	1.109	0.94	0.943	1.033	1.005	1.086	0.979	1.029	0.93	1.038	1.011	1.038	0.991	0.93	1.217	0.985	1.082	1.251	9	9	9	0.946558	0.183967	-0.0792377	0.735261	0.948758	0.215339	-0.0758876	0.666878
1879	F1RHW4	RRAS	RAS related OS=Sus scrofa OX=9823 GN=RRAS PE=1 SV=1	0.932	0.979	1.053	0.842	0.996	1.022	0.949	0.821	0.827	0.898	1.024	0.897	0.944	1.099	1.063	1.034	1.294	1.006	0.922	1.006	0.881	0.929	0.845	0.694	1.137	0.861	1.213	9	9	9	0.992107	0.903002	-0.0114331	0.0443112	1.09083	0.21544	0.125432	0.666674
53	A0A8W4FGP4	EIF3I	Eukaryotic translation initiation factor 3 subunit I OS=Sus scrofa OX=9823 GN=EIF3I PE=1 SV=1	1.047	0.977	1.073	1.221	1.164	1.204	1.044	0.775	0.777	0.93	0.908	0.989	1.163	1.066	1.056	0.904	0.939	0.838	1.025	0.962	1.028	1.146	1.22	0.977	0.914	0.923	1.192	9	9	9	0.988814	0.864683	-0.0162285	0.0631432	0.936721	0.215858	-0.0943087	0.665832
1199	A0A287BKM7	LOC100737265	Small ubiquitin-related modifier OS=Sus scrofa OX=9823 GN=LOC100737265 PE=3 SV=1	0.941	1.16	1.066	1.068	1.024	1.06	1.035	1	1.158	0.966	0.884	0.939	1.031	0.899	0.917	1.022	0.879	0.924	1.024	0.918	0.917	0.809	1.143	1.164	0.937	0.972	1.088	9	9	9	1.06019	0.210899	0.0843191	0.675926	0.943045	0.216157	-0.0846014	0.665231
1704	F1SLL6	MTREX	Exosome RNA helicase MTR4 OS=Sus scrofa OX=9823 GN=MTREX PE=1 SV=3	1.069	1.162	1.185	1.069	1.085	0.92	1.039	1.271	1.101	1.144	1.035	1.006	0.941	0.613	0.71	0.916	0.937	1.091	1.078	1.109	1.129	0.829	1.064	1.127	0.956	0.988	0.903	9	9	9	1.07819	0.120675	0.108609	0.918383	0.913971	0.216406	-0.129779	0.66473
3061	P80928	MIF	Macrophage migration inhibitory factor OS=Sus scrofa OX=9823 GN=MIF PE=1 SV=3	1.036	1.004	1.133	1.063	1.265	1.068	1.107	1.511	1.169	0.823	1.056	0.863	0.787	0.744	1.057	0.688	0.716	1.112	1.255	0.777	0.957	0.963	1.41	0.868	0.94	0.652	1.134	9	9	9	1.15632	0.121577	0.20954	0.91515	0.876061	0.216973	-0.190897	0.663594
126	A0A5G2Q990	RSU1	Ras suppressor protein 1 OS=Sus scrofa OX=9823 GN=RSU1 PE=1 SV=1	0.929	1.118	1.129	1.097	1.091	1.154	1.034	1.01	1.009	0.961	0.999	0.963	1.002	1.201	1.07	0.951	1.012	1.058	1.006	0.97	0.959	1.083	0.922	1.033	1.038	0.952	0.849	9	9	9	1.08613	0.0233206	0.1192	1.63226	1.04596	0.216987	0.0648278	0.663566
640	A0A5G2QCA3	ATL3	Atlastin GTPase 3 OS=Sus scrofa OX=9823 GN=ATL3 PE=1 SV=1	1.02	1.052	1.119	1.021	1.319	1.049	0.935	1.326	1.212	0.94	1.141	1.187	1.028	1.065	1.042	1.013	0.984	1.13	1.107	0.884	1.001	0.998	1.041	0.998	1.051	1.119	0.885	9	9	9	1.10667	0.0673568	0.146226	1.17162	1.0491	0.217226	0.0691485	0.663089
2751	A0A287B7U5	CLIP1	CAP-Gly domain containing linker protein 1 OS=Sus scrofa OX=9823 GN=CLIP1 PE=1 SV=3	1.039	1.015	1.102	0.93	1.029	0.968	0.86	0.761	0.921	1.034	0.88	1.101	1.251	0.995	1.101	0.939	1.086	0.592	1.04	1.082	1.039	0.706	0.9	1.109	0.787	0.755	0.467	9	9	9	1.09385	0.322565	0.129414	0.491382	1.13874	0.218048	0.187444	0.661449
1624	A0A286ZUJ2	SPIN1	Spindlin-1 OS=Sus scrofa OX=9823 GN=SPIN1 PE=3 SV=1	1.134	1.068	1.072	0.945	0.83	0.949	0.96	0.98	1.231	1.106	0.795	0.928	0.817	0.966	1.081	0.94	0.905	0.588	1.136	1.073	0.907	0.727	0.75	0.976	0.948	1.273	1.383	9	9	9	0.999564	0.995851	-0.000629242	0.00180548	0.885861	0.218179	-0.174848	0.661187
2912	I3LP69	NCK1	Cytoplasmic protein OS=Sus scrofa OX=9823 GN=NCK1 PE=4 SV=3	0.932	1.166	1.136	1.175	0.921	0.911	0.978	0.987	1.118	0.819	0.659	0.907	0.825	1.009	1.084	1.003	0.956	0.887	1.176	1.068	0.959	0.719	0.799	1.276	0.957	0.876	1.208	9	9	9	1.03164	0.67367	0.0449454	0.171553	0.901638	0.218427	-0.149381	0.660693
1905	F1ST78	TNS3	Tensin 3 OS=Sus scrofa OX=9823 GN=TNS3 PE=1 SV=4	0.958	0.902	0.964	1.063	1.07	1.036	1.017	0.907	0.792	1.049	0.881	0.96	0.982	1.058	0.994	0.814	1.042	0.924	1.056	1.01	1.049	0.868	1.116	1.102	0.943	0.891	1.192	9	9	9	0.94386	0.238647	-0.0833546	0.622245	0.943319	0.218675	-0.0841831	0.660202
283	A0A5G2R9S8	PLAA	Phospholipase A-2-activating protein isoform 1 OS=Sus scrofa OX=9823 GN=PLAA PE=1 SV=2	1.013	1.021	0.95	1.016	1.07	0.805	0.891	0.873	0.642	0.93	1.007	0.891	1.096	0.822	0.958	0.971	1.006	1.152	0.925	0.974	0.937	0.976	1.216	1.067	0.915	1.171	1.438	9	9	9	0.8609	0.0624649	-0.216082	1.20436	0.918287	0.218802	-0.122983	0.659949
113	A0A286ZNS2	ME2	Malic enzyme OS=Sus scrofa OX=9823 GN=ME2 PE=1 SV=1	1.238	0.955	1.003	1.073	1.095	1.051	1.107	0.994	1.083	1.039	0.984	1.021	1.071	1.104	1.04	1.08	1.055	1.05	0.951	0.888	1.187	0.87	1.052	1.01	1.053	1.048	0.983	9	9	9	1.0616	0.163507	0.0862422	0.786464	1.04446	0.221446	0.0627561	0.654733
2591	A0A287BAN7	TOM1L2	TOM1-like protein 2 isoform 3 OS=Sus scrofa OX=9823 GN=TOM1L2 PE=3 SV=1	0.878	0.774	0.897	1.033	0.931	0.943	0.998	1.051	0.974	0.98	0.949	0.809	0.916	0.883	0.976	0.852	0.898	0.937	1.062	1.192	0.832	0.766	0.88	1.148	0.884	0.945	1.137	9	9	9	0.958512	0.502777	-0.0611311	0.298625	0.926973	0.221533	-0.109401	0.654561
294	A0A8W4FFA1	SMC3	Structural maintenance of chromosomes protein OS=Sus scrofa OX=9823 GN=SMC3 PE=1 SV=1	1.042	0.94	0.986	0.999	1.069	0.881	1.029	0.983	1.012	1.016	0.856	0.91	0.99	0.897	0.984	1.038	1.058	0.919	0.976	1.042	0.898	0.924	1.076	1.193	0.926	0.984	1.113	9	9	9	0.979085	0.585358	-0.0304947	0.232579	0.94919	0.22167	-0.0752317	0.654293
1517	I3L598	ZFR	Zinc finger RNA-binding protein OS=Sus scrofa OX=9823 GN=ZFR PE=1 SV=2	0.965	0.995	0.942	0.996	0.942	1.008	1.059	1.602	1.277	0.995	0.994	1.05	0.921	0.972	1.075	0.687	0.868	0.982	1.03	0.998	1.053	0.986	0.932	1.13	0.922	0.85	1.565	9	9	9	1.03381	0.728826	0.0479644	0.137376	0.902599	0.221749	-0.147843	0.654139
1498	A0A287AYP1	NIPSNAP3A	Nipsnap homolog 3A OS=Sus scrofa OX=9823 GN=NIPSNAP3A PE=1 SV=1	1.002	0.834	0.858	1.079	1.026	1.176	0.997	0.992	1.07	1.004	0.802	0.9	1.043	1.012	1.083	1.026	0.945	1.06	0.984	0.977	0.976	1.086	1.096	1.083	1.079	0.959	1.041	9	9	9	0.973386	0.507188	-0.0389153	0.294831	0.956255	0.221849	-0.0645331	0.653942
1961	A5A8X2	LOC100512174	Novel protein similar to butyrophilin family proteins OS=Sus scrofa OX=9823 GN=LOC100512174 PE=1 SV=1	1.107	0.951	0.862	0.87	0.868	0.841	1.116	0.651	0.586	1.043	1.103	0.935	1.186	1.004	1.087	1.102	1.112	0.968	0.959	0.94	0.991	0.742	0.797	1.234	0.881	1.044	1.225	9	9	9	0.890957	0.211025	-0.166573	0.675667	1.08249	0.221856	0.114356	0.653929
2146	I3LNC5	LPXN	Leupaxin OS=Sus scrofa OX=9823 GN=LPXN PE=3 SV=4	1.095	0.958	1.082	0.868	0.951	0.955	1.11	1.139	1.139	0.957	0.846	0.863	1.057	1.044	0.971	0.902	0.961	0.937	1.122	0.982	0.9	1.003	1.038	0.936	1.076	0.901	0.98	9	9	9	1.04017	0.356643	0.0568132	0.447766	0.955247	0.221959	-0.0660539	0.653726
293	I3LSD3	RPL13	60S ribosomal protein L13 OS=Sus scrofa OX=9823 GN=RPL13 PE=1 SV=2	1.08	1.002	1.017	0.917	0.975	0.876	0.901	0.93	0.872	1.204	0.991	1.009	0.908	0.909	0.962	0.958	0.858	0.828	1.075	1.061	1.098	0.868	1.04	1.156	0.981	0.96	0.931	9	9	9	0.934569	0.10255	-0.0976265	0.989062	0.940785	0.221978	-0.0880628	0.653691
858	F1SAB0	CDC73	Cell division cycle 73 OS=Sus scrofa OX=9823 GN=CDC73 PE=1 SV=3	1.024	0.975	0.866	0.887	0.947	0.873	0.953	0.945	0.997	1.055	0.925	0.983	0.915	0.882	1.032	0.98	0.986	0.86	1.003	1.081	1.07	0.916	0.86	1.115	1.065	0.94	0.983	9	9	9	0.937341	0.087232	-0.0933543	1.05932	0.954057	0.222311	-0.0678521	0.653038
848	A0A287BB44	MMRN2	Multimerin 2 OS=Sus scrofa OX=9823 GN=MMRN2 PE=1 SV=3	1.027	0.94	0.834	1.025	0.866	0.822	1.069	0.889	0.842	1.023	0.951	1.001	0.975	0.853	0.923	1.028	0.929	0.943	1.03	1.043	0.945	0.864	0.779	1.213	1.042	1.063	1.358	9	9	9	0.890436	0.108848	-0.167416	0.963179	0.923851	0.222652	-0.114267	0.652372
177	A0A5G2R9R9	SEPTIN9	Septin 9 OS=Sus scrofa OX=9823 GN=SEPTIN9 PE=1 SV=1	1.024	0.964	0.966	0.978	1.046	0.933	0.986	0.87	0.809	1.047	0.963	0.983	1.075	1.002	0.983	0.924	0.956	0.971	1.039	1.034	1.022	0.912	0.862	0.861	0.997	0.965	0.871	9	9	9	1.00152	0.967854	0.00218858	0.0141902	1.03982	0.222983	0.0563373	0.651728
1967	F1RMJ0	FES	Tyrosine-protein kinase OS=Sus scrofa OX=9823 GN=FES PE=3 SV=1	1.068	0.943	0.983	1.05	0.967	0.971	0.973	1.007	1.032	1.126	1.096	1.026	0.982	0.95	1.065	1.174	1.093	0.921	0.994	1.015	1.024	0.98	0.979	1.147	1.023	0.963	0.898	9	9	9	0.996786	0.904398	-0.0046443	0.0436403	1.04544	0.223308	0.0641095	0.651096
1767	I3LLV1	MKRN2	E3 ubiquitin-protein ligase makorin-2 OS=Sus scrofa OX=9823 GN=MKRN2 PE=4 SV=4	1.029	1.152	1.2	1.332	1.125	1.279	1.068	1.177	1.051	0.883	0.818	0.89	1.123	0.94	1.185	0.996	1.138	0.939	0.882	0.916	0.967	1.157	1.463	1.303	0.959	0.914	1.322	9	9	9	1.05363	0.477746	0.0753648	0.320803	0.90175	0.223428	-0.1492	0.650863
1310	A0A287AAG0	UAP1L1	UDP-N-acetylglucosamine pyrophosphorylase 1 like 1 OS=Sus scrofa OX=9823 GN=UAP1L1 PE=4 SV=1	1.024	0.975	1.007	1.039	0.976	0.722	0.945	1.057	1.073	1.024	0.88	1.048	0.954	0.707	0.804	1.012	0.977	0.987	1.014	0.999	0.977	1.003	0.888	1.013	0.93	0.925	1.185	9	9	9	0.987016	0.778738	-0.0188548	0.108608	0.939445	0.223655	-0.0901197	0.650422
193	F1SI94	PEX16	Peroxisomal membrane protein PEX16 OS=Sus scrofa OX=9823 GN=PEX16 PE=1 SV=3	0.837	1.088	0.958	0.797	0.865	0.853	0.985	0.855	0.928	0.933	0.902	0.864	1.077	1.036	0.838	1.025	0.927	0.942	0.926	1.035	1.02	0.932	1.026	1.149	0.799	1.131	2.274	9	9	9	0.793432	0.14826	-0.333822	0.828975	0.830159	0.224228	-0.26854	0.649311
2825	A0A5G2RDG3	NAALADL1	N-acetylated alpha-linked acidic dipeptidase like 1 OS=Sus scrofa OX=9823 GN=NAALADL1 PE=1 SV=1	1.04	0.931	1.02	0.883	1.096	0.924	0.942	0.986	1.147	1.037	0.974	0.836	1.097	0.916	0.888	0.976	0.91	0.798	1.073	0.953	1.114	0.787	0.871	1.086	0.829	1.192	1.258	9	9	9	0.978828	0.73561	-0.0308729	0.133353	0.920223	0.224408	-0.119945	0.648962
1796	A5GFX7	CTSZ	cathepsin X OS=Sus scrofa OX=9823 GN=CTSZ PE=1 SV=1	1.045	0.989	0.822	1.164	1.105	0.891	1.067	0.997	0.912	0.934	1.086	1.099	1.061	0.94	1.057	0.881	1.15	0.92	1.042	1.083	1.129	1.058	1.153	1.172	0.974	0.916	1.081	9	9	9	0.935887	0.155569	-0.0955941	0.808078	0.950042	0.22479	-0.0739374	0.648223
238	A0A5G2QEF4	PLIN5	Perilipin-5 OS=Sus scrofa OX=9823 GN=PLIN5 PE=1 SV=1	0.767	1.034	0.963	1.007	0.992	0.861	1.021	1.031	1.023	0.999	0.899	0.867	1.112	1.008	0.864	0.95	0.984	0.914	0.795	1.03	0.966	1.185	0.897	1.294	1.034	0.984	1.054	9	9	9	0.941552	0.318423	-0.0868871	0.496996	0.930512	0.224884	-0.103903	0.648042
1808	A0A287BNG5	RAD50	RAD50 double strand break repair protein OS=Sus scrofa OX=9823 GN=RAD50 PE=1 SV=2	1.028	0.95	0.922	1.084	0.87	0.887	1.052	0.992	1.206	1.022	0.819	0.966	0.869	0.9	0.983	1.007	1.034	0.991	1.063	1.058	0.959	0.852	0.881	1.2	0.99	0.916	1.392	9	9	9	0.965632	0.606103	-0.0504545	0.217453	0.922672	0.225858	-0.11611	0.646165
2017	A1XQU5	RPL27	Large ribosomal subunit protein eL27 OS=Sus scrofa OX=9823 GN=RPL27 PE=1 SV=1	0.982	1.097	0.996	0.926	1.016	1.02	1.026	0.97	1.001	1.078	0.881	0.904	1.032	0.969	0.996	0.989	0.973	1.097	0.911	0.782	0.929	0.885	0.92	0.945	1.139	1.085	0.802	9	9	9	1.07573	0.120564	0.105319	0.918781	1.06204	0.225902	0.0868362	0.64608
1178	F1RKK5	PRRC1	Proline rich coiled-coil 1 OS=Sus scrofa OX=9823 GN=PRRC1 PE=1 SV=3	1.103	1.061	1.11	1.058	1.079	1.052	1.072	1.316	1.187	0.912	0.944	1.017	0.923	1.035	1.004	0.858	0.849	1.055	1.04	0.901	1.094	0.93	1.216	0.915	0.988	0.941	1.058	9	9	9	1.10514	0.0311252	0.144231	1.50689	0.946493	0.226089	-0.0793356	0.645721
230	F1RZN9	SORBS2	Sorbin and SH3 domain containing 2 OS=Sus scrofa OX=9823 GN=SORBS2 PE=1 SV=4	0.767	0.861	1.081	0.978	1.075	0.981	0.999	0.835	0.806	0.863	1.031	0.953	1.056	1.246	0.979	0.968	1.067	1.013	0.998	1.253	0.953	0.82	0.75	0.889	1.022	0.84	0.967	9	9	9	0.987164	0.848881	-0.0186377	0.071153	1.08055	0.226104	0.111761	0.645693
481	Q29307	ATP5IF1	ATPase inhibitor, mitochondrial OS=Sus scrofa OX=9823 GN=ATP5IF1 PE=1 SV=2	1.317	1.296	1.007	0.78	0.969	0.728	1.04	0.98	0.892	1.017	0.873	1.069	1.162	0.808	0.767	0.81	0.873	1.106	1.102	1.218	1.297	0.994	1.105	0.867	0.888	0.921	0.901	9	9	9	0.969439	0.715345	-0.0447774	0.145484	0.913053	0.226386	-0.13123	0.645151
1626	A0A8W4FHP1	CD99 antigen OS=Sus scrofa OX=9823 PE=3 SV=1	CD99 antigen OS=Sus scrofa OX=9823 PE=3 SV=1	1.173	0.99	0.902	0.879	0.949	1.049	0.968	0.983	1.161	1.042	1.257	1.061	0.942	1.222	1.053	1.102	0.967	1.061	1.059	1.091	0.978	0.956	0.817	0.932	1.098	1.186	1.023	9	9	9	0.990591	0.851268	-0.0136389	0.0699335	1.06204	0.227629	0.0868313	0.642773
3030	A0A5G2R1J3	MBLAC1	Metallo-beta-lactamase domain-containing protein 1 OS=Sus scrofa OX=9823 GN=MBLAC1 PE=4 SV=1	1.097	1.215	1.334	0.982	1.007	1.228	0.86	1.287	0.881	1.064	1.023	1.059	0.95	0.93	0.975	0.856	1.215	1.534	0.768	0.974	1.029	0.887	1.226	0.962	0.848	1.154	0.793	9	9	9	1.14466	0.0960759	0.194918	1.01739	1.11168	0.227718	0.152738	0.642602
2743	A0A287B9C6	PDP1	Pyruvate dehydrogenase phosphatase catalytic subunit 1 OS=Sus scrofa OX=9823 GN=PDP1 PE=3 SV=2	0.7	1.242	1.059	1.147	1.294	0.759	0.794	0.799	0.831	0.969	1.159	0.831	1.071	0.871	1.002	0.719	0.896	0.776	1.207	0.981	0.991	1.084	1.256	1.203	0.73	0.6	1.307	9	9	9	0.921573	0.472377	-0.11783	0.325711	0.886206	0.228562	-0.174286	0.640995
2100	F1RTF0	PRRC2A	Proline rich coiled-coil 2A OS=Sus scrofa OX=9823 GN=PRRC2A PE=1 SV=2	0.958	1.066	1.095	1.463	1.443	1.028	1.066	1.188	1.246	0.881	0.852	0.919	1.221	0.821	0.826	0.926	0.996	1.026	0.864	1.01	0.956	1.075	1.631	1.057	0.883	0.882	1.128	9	9	9	1.11248	0.249239	0.153781	0.603385	0.892684	0.228686	-0.163779	0.640761
2353	F1RS52	MMAA	Metabolism of cobalamin associated A OS=Sus scrofa OX=9823 GN=MMAA PE=3 SV=1	1.094	1.043	1.081	0.848	1.082	0.876	1.116	1.128	1.225	0.933	0.872	1.006	1.025	0.782	0.897	1.002	1.039	1.172	0.921	0.994	0.991	0.962	1.137	1.029	1.16	0.952	1.122	9	9	9	1.02428	0.622694	0.034606	0.205725	0.941735	0.228839	-0.0866069	0.640471
1349	A0A5G2QHU5	EHBP1L1	EH domain binding protein 1 like 1 OS=Sus scrofa OX=9823 GN=EHBP1L1 PE=1 SV=1	0.952	0.953	0.929	0.975	1.085	0.782	0.974	0.941	0.956	0.968	0.931	0.965	1.017	0.813	0.926	0.971	1.085	0.795	0.972	1.019	1.005	0.792	1.019	1.115	0.88	1.046	1.173	9	9	9	0.947456	0.271743	-0.0778692	0.565842	0.939031	0.228925	-0.0907551	0.640307
2498	A0A287AYE6	LOC100153925	Mitotic-spindle organizing protein 2A isoform X4 OS=Sus scrofa OX=9823 GN=LOC100153925 PE=1 SV=1	0.836	0.919	1.029	1.174	1.026	0.876	0.933	0.688	0.65	1.006	1.415	0.803	1.214	1.166	1.125	1.146	1.064	0.953	0.997	1.035	0.948	0.957	1.017	1.193	0.959	0.952	1.103	9	9	9	0.887567	0.0898913	-0.172072	1.04628	1.07979	0.229046	0.110757	0.640077
1237	F1RLR4	ERCC4	ERCC excision repair 4, endonuclease catalytic subunit OS=Sus scrofa OX=9823 GN=ERCC4 PE=3 SV=4	1.207	1.254	1.374	1.097	1.175	0.758	0.798	0.834	0.935	1.164	1.121	1.07	1.249	0.745	0.951	0.734	0.723	0.688	1.051	1.189	1.212	0.768	1.679	1.132	0.755	0.683	1.506	9	9	9	0.945564	0.663298	-0.0807531	0.178291	0.846617	0.229118	-0.240219	0.639941
357	I3LDC7	IDH1	Isocitrate dehydrogenase [NADP] OS=Sus scrofa OX=9823 GN=IDH1 PE=1 SV=4	1.185	0.985	1.057	0.828	0.849	0.846	1.063	1.065	0.99	1.049	1.04	1.031	0.92	0.919	0.935	0.941	0.96	1.024	1.049	0.92	1.097	0.775	0.87	0.805	0.942	0.888	1.011	9	9	9	1.06115	0.313388	0.0856236	0.503917	1.05528	0.229141	0.0776299	0.639898
1152	I3LGA2	ABHD12	Lysophosphatidylserine lipase ABHD12 OS=Sus scrofa OX=9823 GN=ABHD12 PE=1 SV=3	0.951	0.881	0.839	0.968	1.065	0.77	1.083	0.869	0.9	1.088	1.053	0.933	0.974	0.618	0.694	1.074	1.048	0.906	1.011	1.025	0.995	0.954	0.929	0.965	0.981	0.948	1.504	9	9	9	0.894115	0.135142	-0.161467	0.869211	0.900773	0.229318	-0.150764	0.639562
614	F1S192	PFDN2	Prefoldin subunit 2 OS=Sus scrofa OX=9823 GN=PFDN2 PE=1 SV=1	1.204	1.033	0.962	0.959	0.916	1.21	0.968	0.936	1.121	1.174	1.152	1.034	0.943	1.155	1.057	0.894	0.892	0.906	1.121	1.007	1.029	0.987	0.862	0.774	0.957	1.022	0.846	9	9	9	1.08181	0.157915	0.113451	0.801576	1.06996	0.229831	0.097556	0.638591
1021	F1RRX4	LCP2	Lymphocyte cytosolic protein 2 OS=Sus scrofa OX=9823 GN=LCP2 PE=4 SV=4	1.055	1.139	1.11	1.131	1.13	1.193	1.141	1.208	1.209	1.014	0.906	0.956	1.085	1.126	1.168	1.165	1.074	1.191	0.963	0.951	1.039	0.983	1.162	1.071	1.048	1.046	0.97	9	9	9	1.1173	0.00064596	0.160012	3.18979	1.04895	0.230335	0.0689526	0.63764
844	P20461	EIF2S3	Eukaryotic translation initiation factor 2 subunit 3 OS=Sus scrofa OX=9823 GN=EIF2S3 PE=1 SV=2	1.121	1.013	1.016	0.983	1.066	1.041	1.027	1.061	0.977	1.072	1.027	1.054	1.041	1.017	0.971	0.98	1.018	1.016	1.043	0.965	1.079	0.97	1.066	0.861	0.995	1.027	0.851	9	9	9	1.05058	0.137246	0.071188	0.862502	1.03827	0.230379	0.0541883	0.637557
227	A0A287ATF2	DSG2	Desmoglein 2 OS=Sus scrofa OX=9823 GN=DSG2 PE=1 SV=3	1.057	0.988	0.983	0.887	0.894	0.942	0.977	0.814	1.111	1.015	0.986	0.854	1.08	1.056	1.106	1.216	1.05	1.055	1.099	1.036	1.188	1.055	0.91	1.007	1.138	1.245	1.38	9	9	9	0.86031	0.0140973	-0.217071	1.85086	0.936369	0.230464	-0.0948508	0.637396
221	Q29214	RPLP0	Large ribosomal subunit protein uL10 OS=Sus scrofa OX=9823 GN=RPLP0 PE=1 SV=2	1.146	0.974	1.034	0.908	0.904	1.004	1.007	0.96	1.028	1.05	0.854	1.051	1.017	0.92	0.923	1.064	1.058	1.103	0.999	0.984	1.004	0.965	0.87	0.741	0.986	0.985	1.04	9	9	9	1.0456	0.284558	0.0643352	0.545828	1.05435	0.230699	0.0763544	0.636953
58	A0A8W4FGV4	SYNM	Synemin OS=Sus scrofa OX=9823 GN=SYNM PE=1 SV=1	0.603	0.868	1.03	0.87	0.974	1.027	1.001	1.073	0.97	0.732	0.961	0.845	1.009	1.139	1.06	0.919	1.108	1.014	0.866	1.248	0.778	0.729	0.64	0.762	1.059	0.737	1.066	9	9	9	1.06734	0.485892	0.0940239	0.313461	1.11439	0.231516	0.15626	0.635419
786	A0A8D0V2Q5	RAVER1	Ribonucleoprotein, PTB binding 1 OS=Sus scrofa OX=9823 GN=RAVER1 PE=1 SV=1	1.081	1.005	1.003	0.984	0.947	0.961	1.007	1.09	1.038	0.977	1.008	0.953	0.991	0.991	1.012	0.997	0.924	0.939	0.965	0.968	1.056	1.056	1.017	0.99	0.896	0.991	1.16	9	9	9	1.00187	0.950232	0.00269293	0.0221704	0.96626	0.231692	-0.0495166	0.635089
2007	F1SGS2	LOC100739080	Peptidase S1 domain-containing protein OS=Sus scrofa OX=9823 GN=LOC100739080 PE=1 SV=2	1.081	0.804	0.819	1.595	0.942	0.8	0.609	0.511	0.502	1.074	1.192	0.921	1.143	1.158	2.035	0.908	1.576	0.701	0.851	0.792	0.997	1.07	1.883	1.086	0.68	0.587	0.684	9	9	9	0.887949	0.541305	-0.171451	0.266558	1.24079	0.231922	0.311257	0.634658
1334	A0A8W4FQ33	IQGAP2	IQ motif containing GTPase activating protein 2 OS=Sus scrofa OX=9823 GN=IQGAP2 PE=1 SV=1	1.044	1.06	0.955	1.057	1.086	1.035	0.992	0.96	1.003	1.004	0.978	0.945	1.059	0.959	0.964	1.008	0.943	0.945	0.98	0.998	1.062	0.95	1.08	1.104	1.004	0.914	0.988	9	9	9	1.01233	0.636251	0.0176865	0.196372	0.969714	0.232019	-0.0443693	0.634476
385	A0A287BQA7	SORL1	Sortilin-related receptor OS=Sus scrofa OX=9823 GN=SORL1 PE=1 SV=1	1.086	1.09	1.165	1.06	1.017	1.025	0.96	1.021	1.052	1.02	0.984	0.823	0.944	0.835	0.956	0.972	0.908	0.96	0.889	1.015	0.969	0.987	1.145	1.165	0.86	1.02	0.848	9	9	9	1.06496	0.157832	0.0907971	0.801804	0.944257	0.232442	-0.0827483	0.633685
2077	A0A480Y2E3	KNG1	Kininogen 1 OS=Sus scrofa OX=9823 GN=KNG1 PE=1 SV=1	0.85	1.272	1.357	0.969	1.073	1.159	1.006	1.03	1.245	0.859	0.879	0.86	0.994	1.234	1.079	0.762	0.678	0.932	1.295	0.821	0.994	1.002	0.932	0.978	0.766	1.139	1.27	9	9	9	1.08307	0.31449	0.115127	0.502393	0.899967	0.232819	-0.152055	0.632982
3064	A0A287BE30	STIM1	Stromal interaction molecule 1 OS=Sus scrofa OX=9823 GN=STIM1 PE=1 SV=2	1.004	1.042	0.973	1.107	1.152	0.836	1	1.049	0.955	0.917	0.869	0.855	1.018	0.839	0.821	0.942	1.007	1.065	0.89	0.956	1.05	0.873	1.225	0.901	0.949	0.878	1.262	9	9	9	1.01492	0.802865	0.0213595	0.0953573	0.927538	0.233164	-0.108522	0.632339
2920	A0A287AUP9	MPG	DNA-3-methyladenine glycosylase II OS=Sus scrofa OX=9823 GN=MPG PE=3 SV=2	1.066	0.833	0.871	1.09	0.911	0.783	0.854	1.015	1.092	1.108	0.844	1.029	1.004	0.967	0.974	1.253	1.051	1.071	0.882	1.045	1.016	1.045	0.897	1.042	0.9	0.855	1.087	9	9	9	0.971034	0.580042	-0.0424058	0.236541	1.06067	0.233556	0.0849735	0.631609
1031	A0A287B7K9	PARVA	Parvin alpha OS=Sus scrofa OX=9823 GN=PARVA PE=1 SV=1	0.771	0.834	0.932	0.956	0.937	0.989	0.99	0.852	0.902	0.989	0.912	0.923	0.998	1.349	1.161	0.987	1.145	0.924	0.967	1.079	0.869	0.77	0.652	1.059	1.034	0.844	1.247	9	9	9	0.957986	0.555463	-0.0619233	0.255345	1.10175	0.233726	0.139795	0.631293
1260	I3LC07	RAB18	Ras-related protein Rab-18 OS=Sus scrofa OX=9823 GN=RAB18 PE=1 SV=1	0.972	0.992	0.929	1.007	1.017	1.065	1.049	1.014	0.922	1.067	0.963	0.854	1.025	1.085	1.078	1.068	1.043	0.984	0.908	1.035	0.965	0.961	1.15	0.963	0.978	0.926	0.873	9	9	9	1.02375	0.474513	0.0338592	0.323751	1.04658	0.233981	0.0656835	0.630819
2398	A0A8W4FIS8	RPS26	40S ribosomal protein S26 OS=Sus scrofa OX=9823 GN=RPS26 PE=3 SV=1	1.041	1.241	1.32	1.284	1.415	0.711	1.11	1.052	0.808	0.993	0.994	1.196	0.959	0.638	0.833	0.765	0.873	0.916	1.165	0.951	1.169	0.811	0.969	1.072	0.893	0.872	1.017	9	9	9	1.11918	0.208764	0.162447	0.680344	0.915686	0.234373	-0.127076	0.630092
1814	A0A8D1AXG3	ATP5F1D	ATP synthase F1 subunit delta OS=Sus scrofa OX=9823 GN=ATP5F1D PE=1 SV=1	1.166	1.04	0.997	0.913	0.878	0.97	1.11	0.811	0.821	1.132	1.073	1.009	1.084	1.016	0.877	1.043	1.004	0.981	0.976	1.027	1.055	0.833	0.809	0.861	0.943	1.042	1.16	9	9	9	1	1	0	0	1.05892	0.234907	0.0826002	0.629104
1385	Q29293	RPL3	Large ribosomal subunit protein uL3 OS=Sus scrofa OX=9823 GN=RPL3 PE=2 SV=2	1.203	1.091	1.149	1.072	1.058	0.912	1.058	1.096	0.956	1.085	0.865	1.015	1.006	0.816	0.899	0.834	0.962	1.03	1.026	0.922	1.106	1.018	1.279	0.99	0.956	0.973	0.828	9	9	9	1.05463	0.300845	0.0767334	0.521658	0.93559	0.23652	-0.0960513	0.626132
2195	F1SPS7	APEH	Acylamino-acid-releasing enzyme OS=Sus scrofa OX=9823 GN=APEH PE=4 SV=3	1.018	1.067	1.15	1.067	1.011	1.105	0.981	1.096	1.068	0.971	1.039	0.921	0.955	0.979	0.949	0.986	0.978	1.007	0.99	1.142	0.996	0.827	1.069	1.186	0.923	1.01	1.077	9	9	9	1.0372	0.366053	0.0526965	0.436456	0.95282	0.236552	-0.0697245	0.626073
1749	A0A287AHX7	CDHR5	Cadherin related family member 5 OS=Sus scrofa OX=9823 GN=CDHR5 PE=1 SV=1	1.027	0.93	0.824	0.861	0.867	1.066	0.995	1.11	1.222	0.954	0.877	0.849	0.916	0.965	0.945	1.025	0.992	0.857	1.001	0.982	1.13	0.794	0.845	1.216	0.979	0.971	0.992	9	9	9	0.999102	0.988579	-0.00129593	0.00498849	0.940516	0.237269	-0.0884752	0.624759
2611	A0A287AAV0	GTPBP1	GTP-binding protein 1 OS=Sus scrofa OX=9823 GN=GTPBP1 PE=1 SV=1	0.957	0.965	0.989	0.939	0.888	0.868	1.031	0.984	1.044	0.961	0.866	0.914	0.883	0.842	0.849	0.966	0.928	0.944	0.939	1.031	0.955	0.833	0.797	1.155	0.934	0.883	1.114	9	9	9	1.00278	0.953487	0.00400147	0.0206852	0.943525	0.237276	-0.0838673	0.624747
1589	K7N7E7	MOGS	Mannosyl-oligosaccharide glucosidase OS=Sus scrofa OX=9823 GN=MOGS PE=1 SV=1	0.998	1.038	1.036	0.959	0.944	1.013	1.032	1.079	0.969	0.978	0.985	1.076	0.99	1.01	0.96	1.011	0.987	1.028	0.985	1.02	1.179	0.986	0.967	1.044	0.989	1.036	1.104	9	9	9	0.974006	0.338402	-0.0379968	0.470567	0.969388	0.23813	-0.0448542	0.623186
1418	A0A287BL20	MAP1B	Microtubule associated protein 1B OS=Sus scrofa OX=9823 GN=MAP1B PE=1 SV=1	0.871	1.011	1.08	1.03	0.816	0.914	1.035	0.834	0.876	0.934	1.158	0.916	0.913	1.01	1.004	1.209	1.226	1.097	0.989	0.906	0.999	0.912	0.757	1.101	1.084	1.108	0.993	9	9	9	0.956831	0.408808	-0.0636635	0.388481	1.06984	0.238418	0.0973929	0.622661
850	A0A4X1TTH9	PEBP1	Phosphatidylethanolamine-binding protein 1 OS=Sus scrofa OX=9823 GN=PEBP1 PE=1 SV=1	1.079	1.133	1.197	0.981	1.134	1.15	1.095	0.963	0.999	0.998	1.027	0.939	1.035	1.187	1.021	1.04	1.025	1.064	0.949	1.022	0.981	1.038	0.954	0.74	1.129	1.115	0.909	9	9	9	1.10117	0.055981	0.139031	1.25196	1.05647	0.238651	0.0792479	0.622237
1113	A0A5G2Q9S0	NME2	Nucleoside diphosphate kinase OS=Sus scrofa OX=9823 GN=NME2 PE=1 SV=1	1.002	1.028	1.468	0.916	1.256	0.809	0.973	0.947	1.583	0.876	1.1	0.898	1.267	1.028	0.899	0.842	1.074	0.841	0.904	0.811	0.896	0.958	1.02	0.881	1.069	0.919	0.697	9	9	9	1.22403	0.0585434	0.291644	1.23252	1.08216	0.239954	0.113911	0.619872
3004	A0A8D1YFP2	FNDC3A	Fibronectin type III domain containing 3A OS=Sus scrofa OX=9823 GN=FNDC3A PE=1 SV=1	1.132	1.126	1.087	1.327	1.55	1.755	1.012	1.081	1.166	1.113	0.941	1.011	1.12	2.127	1.529	1.014	1.056	0.98	1.03	0.996	1.066	1.062	1.128	1.26	1.039	0.955	0.843	9	9	9	1.198	0.0452548	0.260623	1.34434	1.16121	0.240138	0.21563	0.619539
688	A0A5G2QAG3	LAP3	Cytosol aminopeptidase OS=Sus scrofa OX=9823 GN=LAP3 PE=1 SV=1	1.103	1.037	1.017	1	1.03	1.096	1.09	1.103	1.009	1.053	1.069	0.999	1.006	1.025	1.034	0.993	1.012	1.008	1.004	0.987	1.091	1.031	1.004	0.822	1.015	1.003	0.952	9	9	9	1.06465	0.0416818	0.0903843	1.38005	1.03255	0.240612	0.0462135	0.618683
2917	A5A761	SFXN1	Sideroflexin-1 OS=Sus scrofa OX=9823 GN=SFXN1 PE=2 SV=1	0.994	1.136	1.069	1.061	1.057	1.066	1.045	1.036	1.095	0.991	0.918	0.972	1.036	1.092	1.044	1.029	1.011	0.91	0.988	1.026	1.059	0.961	0.998	1.112	0.931	1.091	1.308	9	9	9	1.00897	0.816873	0.012886	0.0878457	0.950285	0.240813	-0.0735679	0.61832
1597	A0A8W4FNZ4	SH3BP1	SH3 domain binding protein 1 OS=Sus scrofa OX=9823 GN=SH3BP1 PE=4 SV=1	0.978	1.067	0.951	0.971	1.035	0.913	0.973	0.985	1.066	1.025	1.09	0.866	1.043	0.907	1.06	1.046	1.03	1.008	0.943	1.028	0.91	0.924	1.027	1.027	0.924	0.951	1.013	9	9	9	1.02195	0.392946	0.0313252	0.405667	1.0375	0.240868	0.0531093	0.61822
152	Q5XLD3	CKM	Creatine kinase M-type OS=Sus scrofa OX=9823 GN=CKM PE=2 SV=1	0.637	0.836	1.14	0.874	0.968	1.189	1.048	1.084	1.071	0.847	1.031	0.839	1.074	1.314	1.07	0.999	1.082	1.027	0.835	1.307	0.868	0.607	0.555	0.733	1.378	0.838	0.99	9	9	9	1.09074	0.474013	0.125309	0.32421	1.1445	0.241442	0.194711	0.617187
2350	P79273	ACADS	Short-chain specific acyl-CoA dehydrogenase, mitochondrial OS=Sus scrofa OX=9823 GN=ACADS PE=2 SV=1	0.996	0.907	0.889	1.061	0.914	1.074	0.978	0.794	0.901	1.098	0.948	0.968	1.023	1.124	1.023	1.152	0.954	0.86	0.893	1.034	1.11	0.808	0.89	1.112	0.895	0.979	0.908	9	9	9	0.986673	0.786579	-0.0193563	0.104258	1.06038	0.24152	0.0845784	0.617048
400	A0A5G2QHB2	UBXN1	UBX domain protein 1 OS=Sus scrofa OX=9823 GN=UBXN1 PE=1 SV=1	1.024	0.935	0.898	1.055	0.894	1.16	1.122	1.079	1.184	1.066	0.987	0.89	0.816	0.849	1.115	1.041	0.989	0.955	0.978	1.004	0.941	1.192	1.339	1.037	0.925	0.965	0.954	9	9	9	1.00171	0.976324	0.00247063	0.0104062	0.932833	0.241537	-0.100309	0.617017
2979	F1S1P8	POF1B	POF1B actin binding protein OS=Sus scrofa OX=9823 GN=POF1B PE=1 SV=3	1.071	1.03	0.963	1.194	1.112	0.857	0.775	0.804	0.919	1.039	0.876	0.954	1.068	0.951	0.905	0.755	0.818	0.43	1.015	0.997	1.105	0.962	1.015	0.949	0.94	0.755	0.856	9	9	9	1.01524	0.80715	0.0218254	0.093046	0.907145	0.241675	-0.140596	0.616768
605	A0A287AAG8	VWFA domain-containing protein OS=Sus scrofa OX=9823 PE=3 SV=1	VWFA domain-containing protein OS=Sus scrofa OX=9823 PE=3 SV=1	0.975	0.917	0.884	1.163	1.036	0.939	0.927	0.938	0.955	0.968	0.876	0.929	0.936	0.953	1.175	1.036	1.065	0.922	0.873	0.996	0.917	0.856	1.03	1.012	0.924	0.846	0.983	9	9	9	1.0352	0.378157	0.0499124	0.422327	1.05014	0.242026	0.0705766	0.616137
1555	F2Z5B1	SERPINB1	Serpin family B member 1 OS=Sus scrofa OX=9823 GN=SERPINB1 PE=1 SV=2	1.023	0.966	0.921	1.047	0.937	0.992	1.046	1.121	1.185	1.006	0.831	0.994	0.897	1.039	1.137	1.285	1.204	1.029	0.888	1.024	0.954	0.917	0.968	1.116	1.047	0.959	0.961	9	9	9	1.04573	0.241635	0.0645137	0.61684	1.06656	0.242213	0.0929665	0.615802
2396	Q767L7	TUBB	Tubulin beta chain OS=Sus scrofa OX=9823 GN=TUBB PE=1 SV=1	1.156	1.041	1.15	0.973	0.942	1.191	1.129	0.995	0.979	1.081	1.025	1.091	0.913	1.075	0.994	0.99	0.954	1.177	0.905	0.954	1.027	1.218	0.982	0.86	0.945	1.092	0.716	9	9	9	1.09852	0.116602	0.135557	0.933295	1.06909	0.2425	0.0963812	0.615288
286	A0A8D1GCI9	DNAJC10	DnaJ homolog subfamily C member 10 OS=Sus scrofa OX=9823 GN=DNAJC10 PE=1 SV=1	1.047	0.925	0.968	1.117	0.976	0.976	0.881	0.85	1.007	1.09	0.839	0.941	0.929	0.913	1.11	0.91	0.901	0.848	1.032	1.048	0.907	0.856	1.054	1.307	0.914	0.886	1.101	9	9	9	0.960681	0.47727	-0.0578707	0.321236	0.931466	0.242505	-0.102425	0.615278
2666	A0A287B8B6	CAPG	Capping actin protein, gelsolin like OS=Sus scrofa OX=9823 GN=CAPG PE=1 SV=1	1.269	1.209	1.143	1.192	1.149	0.943	1.037	0.821	0.722	1.16	1.199	1.278	1.234	1.124	1.245	0.857	1.007	1.634	1.073	1.089	1.083	1.311	1.328	1.061	0.867	0.855	1.096	9	9	9	0.971525	0.714424	-0.0416768	0.146044	1.09987	0.242555	0.137329	0.61519
1405	Q1KS52	IGFALS	Acid-labile subunit OS=Sus scrofa OX=9823 GN=IGFALS PE=1 SV=1	1.085	1.123	0.987	0.925	0.805	0.609	1.069	1.026	1.098	1.124	1.053	0.848	0.724	0.739	1.001	1.025	1.043	0.987	0.884	1.08	0.924	1.247	0.9	1.016	1.005	1.028	1.137	9	9	9	0.946427	0.435388	-0.0794374	0.361124	0.926581	0.242817	-0.110012	0.614721
1822	A0A287BGV1	LTBP4	Latent transforming growth factor beta binding protein 4 OS=Sus scrofa OX=9823 GN=LTBP4 PE=1 SV=2	0.99	0.951	0.971	1.047	1.083	1.002	1.024	1.026	1.045	1.012	0.944	0.918	1.048	1.084	1.023	0.979	1.03	0.872	1.019	1.093	1.002	1.02	1.034	1.272	0.857	0.971	1.131	9	9	9	0.972337	0.493333	-0.040471	0.30686	0.947973	0.242968	-0.0770818	0.614451
2157	A0A8W4FAZ5	RDX	Radixin OS=Sus scrofa OX=9823 GN=RDX PE=1 SV=1	0.924	1.043	1.023	0.866	1.024	0.703	0.939	1.115	0.96	0.962	0.916	1.008	0.879	0.681	0.77	0.928	0.95	0.88	1.072	0.916	1.02	0.817	0.834	0.928	0.864	0.945	1.101	9	9	9	1.01177	0.834897	0.0168797	0.0783668	0.938449	0.243035	-0.09165	0.614331
1968	A0A287A7H6	DDX47	RNA helicase OS=Sus scrofa OX=9823 GN=DDX47 PE=3 SV=2	1.222	1.225	1.278	1.103	1.136	1.217	1.194	1.175	1.211	1.302	1.064	1.101	1.024	1.085	1.183	0.865	0.973	1.059	1.201	1.374	1.212	1.091	1.309	1.176	1.045	0.936	1	9	9	9	1.04031	0.384513	0.057018	0.415089	0.933488	0.243794	-0.0992966	0.612977
847	P35479	Leukocyte cysteine proteinase inhibitor 1 OS=Sus scrofa OX=9823 PE=1 SV=1	Leukocyte cysteine proteinase inhibitor 1 OS=Sus scrofa OX=9823 PE=1 SV=1	1.106	1.121	1.193	0.945	1.138	0.969	0.937	0.981	0.958	0.942	0.909	1.214	0.932	0.839	1.023	0.944	1.007	1.116	1.033	0.834	1.141	0.969	0.923	0.754	0.959	0.884	0.837	9	9	9	1.12167	0.0424221	0.165649	1.37241	1.07103	0.243993	0.0990047	0.612623
1908	A0A287ARK8	CD22	B-cell receptor CD22 OS=Sus scrofa OX=9823 GN=CD22 PE=4 SV=2	1.101	1.092	1.217	1.173	1.102	1.155	1.142	1.045	0.893	1.041	0.885	0.925	0.926	0.947	0.971	0.903	1.013	0.894	0.914	1.002	0.94	0.855	1.354	0.925	0.936	1.05	1.127	9	9	9	1.08975	0.150028	0.123998	0.823827	0.934307	0.244416	-0.0980308	0.611871
668	A0A287AAW2	SCAF8	SR-related CTD associated factor 8 OS=Sus scrofa OX=9823 GN=SCAF8 PE=4 SV=3	0.966	1.127	1.045	0.996	0.951	0.746	0.972	1.074	1.143	1.064	0.937	0.979	1.08	0.731	0.824	0.879	0.921	0.931	1.008	1.004	1.084	0.813	1.01	1.061	0.85	0.901	1.22	9	9	9	1.00771	0.895862	0.0110786	0.0477589	0.93241	0.244673	-0.100964	0.611413
1985	A0A8D0VJ81	GANAB	Glucosidase II alpha subunit OS=Sus scrofa OX=9823 GN=GANAB PE=1 SV=1	1.082	1.04	1.063	1.072	0.998	0.92	1.054	1.105	1.173	1.021	0.935	0.973	0.96	0.943	1.032	1.034	0.981	1.061	1.035	0.989	1.047	0.921	1.102	1.144	1.012	0.971	1.013	9	9	9	1.02956	0.361906	0.0420344	0.441405	0.968161	0.244795	-0.0466809	0.611197
439	I3LFE8	PPA2	inorganic diphosphatase OS=Sus scrofa OX=9823 GN=PPA2 PE=1 SV=2	1.022	1.398	1.132	1.172	1.027	0.97	0.733	0.85	0.966	1.041	0.881	1.238	1.151	0.962	0.887	1.002	0.907	1.067	0.906	0.809	1.209	2.118	1.206	1.351	0.86	1.586	0.788	9	9	9	0.855719	0.299844	-0.224792	0.523104	0.843349	0.244856	-0.245798	0.611089
154	F1RM40	SYMPK	Symplekin scaffold protein OS=Sus scrofa OX=9823 GN=SYMPK PE=1 SV=3	1.103	1.085	0.97	1.094	0.932	0.853	0.986	0.876	0.803	1.096	1.013	1.208	1.052	0.844	0.971	0.805	0.867	0.825	1.089	0.987	1.097	1.033	1.399	1.075	0.866	0.851	1.052	9	9	9	0.920944	0.220581	-0.118815	0.656432	0.918722	0.245009	-0.1223	0.610818
1572	F2Z572	PRPS1	Ribose-phosphate pyrophosphokinase 1 OS=Sus scrofa OX=9823 GN=PRPS1 PE=1 SV=2	1.028	1.253	1.211	1.139	1.203	1.138	1.095	1.267	1.029	0.915	0.75	0.986	1.099	0.894	0.998	0.868	1.001	1.098	0.963	0.943	0.994	1.085	1.801	0.984	1.041	1.001	0.897	9	9	9	1.06736	0.470473	0.0940471	0.327466	0.886703	0.24543	-0.173477	0.610072
2808	I3LEF8	HSD17B4	Hydroxysteroid 17-beta dehydrogenase 4 OS=Sus scrofa OX=9823 GN=HSD17B4 PE=1 SV=2	0.982	1.028	1.035	1.133	1.062	1.053	1.026	1.048	1.133	1.001	0.967	0.904	0.948	0.956	1.034	0.953	0.99	0.941	1.002	1.071	0.986	0.951	1.155	1.036	0.931	0.923	0.95	9	9	9	1.05497	0.0905116	0.0772012	1.0433	0.965464	0.245904	-0.0507062	0.609234
725	A0A5G2QEW1	ITIH4	Inter-alpha-trypsin inhibitor heavy chain 4 OS=Sus scrofa OX=9823 GN=ITIH4 PE=1 SV=1	0.787	1.181	0.916	0.996	0.899	0.883	1.056	0.86	0.984	1.248	0.882	0.857	0.95	1.207	0.999	0.953	0.958	0.984	0.966	1.065	1.217	1.323	0.97	1.036	0.929	1.136	1.067	9	9	9	0.881862	0.0430784	-0.181375	1.36574	0.930889	0.246456	-0.103319	0.60826
1523	A0A287B8U5	FAM111A	FAM111 trypsin like peptidase A OS=Sus scrofa OX=9823 GN=FAM111A PE=1 SV=1	0.98	0.916	1.036	1.12	1.051	0.981	1.068	0.904	1.025	1.009	1.002	0.936	1.058	1.041	1.065	1.533	1.545	1.066	0.843	0.926	0.938	0.893	0.914	0.983	0.939	1.33	1.391	9	9	9	0.9917	0.906755	-0.0120238	0.0425099	1.11991	0.246626	0.163381	0.607961
365	A0A286ZWS0	SH3BGRL3	SH3 domain-binding glutamic acid-rich-like protein OS=Sus scrofa OX=9823 GN=SH3BGRL3 PE=1 SV=1	0.98	0.921	0.886	0.96	0.932	0.881	1.008	1.064	1.13	0.94	0.903	1.013	0.931	0.808	0.922	0.95	0.996	1.147	0.995	0.886	0.96	0.766	0.859	0.839	0.953	0.812	1.062	9	9	9	1.07747	0.116269	0.10765	0.934537	1.05878	0.247521	0.082403	0.606387
2516	A0A287BIV6	MRPL37	Large ribosomal subunit protein mL37 OS=Sus scrofa OX=9823 GN=MRPL37 PE=1 SV=1	1.025	0.999	0.988	1.307	1.069	0.928	1.218	1.009	1.166	0.975	0.815	0.939	1.068	0.884	1.372	0.975	0.901	0.832	0.996	0.951	1.081	0.918	1.552	1.338	0.962	1.005	0.949	9	9	9	0.995591	0.955174	-0.00637542	0.0199174	0.89838	0.247526	-0.154603	0.60638
347	A0A4X1SJ12	NOP56	Nucleolar protein 56 OS=Sus scrofa OX=9823 GN=NOP56 PE=1 SV=1	1.068	0.915	0.963	1.072	1.071	1.262	1.091	1.091	1.076	1.086	0.945	1.023	0.984	1.103	1.044	1.046	0.963	0.977	0.846	1.003	0.96	1.089	0.991	0.971	1.016	0.999	0.992	9	9	9	1.08368	0.0494792	0.11594	1.30558	1.03428	0.247916	0.048633	0.605696
328	Q767K8	MRPS18B	Small ribosomal subunit protein mS40 OS=Sus scrofa OX=9823 GN=MRPS18B PE=1 SV=1	0.883	0.947	0.915	0.931	0.891	0.741	0.977	1.161	1.172	0.985	1.059	0.878	0.963	0.872	0.974	0.841	0.908	0.915	1.079	1.051	0.993	0.671	0.972	1.567	0.9	0.973	1.098	9	9	9	0.926268	0.417887	-0.110498	0.378941	0.9023	0.249437	-0.148321	0.603038
2752	A0A8D1VQK7	ST13	ST13 Hsp70 interacting protein OS=Sus scrofa OX=9823 GN=ST13 PE=1 SV=1	1.126	0.973	1.036	0.925	0.98	1.11	1.041	0.915	0.957	1.132	0.859	0.924	0.969	1.182	1.011	1.045	0.952	0.957	0.997	0.994	0.901	1.034	0.83	0.9	1.015	1.014	0.896	9	9	9	1.05617	0.145076	0.0788429	0.838404	1.05244	0.249499	0.07374	0.602932
338	A0A8D0T470	ACTA2	Actin, aortic smooth muscle OS=Sus scrofa OX=9823 GN=ACTA2 PE=3 SV=1	0.817	0.82	0.892	0.947	1.022	1.139	0.921	1.194	1.258	1.145	1.099	0.941	0.923	1.014	0.991	1.24	0.981	0.988	1.205	1.04	0.877	0.853	0.799	0.906	1.157	1.012	0.823	9	9	9	1.03898	0.614337	0.0551623	0.211593	1.07495	0.249553	0.104275	0.602838
384	Q6QAP7	RPS17	Small ribosomal subunit protein eS17 OS=Sus scrofa OX=9823 GN=RPS17 PE=1 SV=3	1.049	0.922	1.085	0.969	1.107	1.095	1.069	1.399	1.27	0.908	0.831	0.989	1.023	0.903	0.93	0.857	0.891	1.047	0.992	1.007	0.974	1.041	1.093	0.829	1.056	0.835	0.973	9	9	9	1.13239	0.0414979	0.179366	1.38197	0.952159	0.250987	-0.0707254	0.600349
1534	A0A5G2R0T5	SFXN5	Sidoreflexin OS=Sus scrofa OX=9823 GN=SFXN5 PE=1 SV=2	1.033	1.004	1.045	1.055	0.942	0.958	1.147	1.057	1.189	0.983	0.78	0.909	0.954	1.052	1.013	0.926	1.086	1.065	1.027	0.977	0.948	1.057	0.983	1.043	0.993	0.995	1.151	9	9	9	1.0279	0.407549	0.0397069	0.38982	0.955744	0.251235	-0.0653031	0.59992
1039	F1RRD7	CLASP2	Cytoplasmic linker associated protein 2 OS=Sus scrofa OX=9823 GN=CLASP2 PE=1 SV=4	1.085	1.014	1.076	1.111	1.068	1.217	1.097	1.078	1.171	1.134	0.927	0.922	0.973	1.106	1.096	1.032	1.054	0.955	1.045	1.05	1.076	1.014	1.175	1.087	1.037	1.062	0.997	9	9	9	1.03919	0.13366	0.0554609	0.874	0.963953	0.251341	-0.0529658	0.599737
1759	D0G0B3	ACAA2	3-ketoacyl-CoA thiolase, mitochondrial OS=Sus scrofa OX=9823 GN=ACAA2 PE=1 SV=1	1.019	1.045	0.971	1.082	1.18	0.772	0.96	0.829	0.842	0.982	1.104	1.024	1.146	0.808	0.947	0.952	0.923	0.887	0.999	0.996	1.1	0.807	1.358	1.238	0.939	0.866	1.242	9	9	9	0.911472	0.238361	-0.13373	0.622764	0.91912	0.251877	-0.121675	0.598812
2443	A0A8D1AA90	CPT2	Carnitine O-palmitoyltransferase 2, mitochondrial OS=Sus scrofa OX=9823 GN=CPT2 PE=1 SV=1	1.053	0.944	0.942	1.003	1.063	1	1.044	1.069	1.046	1.026	0.958	0.945	1.006	1.03	0.957	1.047	0.998	0.973	0.903	0.981	1.128	1.075	1.065	1.112	1.078	1.008	0.916	9	9	9	0.988992	0.727589	-0.0159692	0.138114	0.964818	0.252011	-0.0516719	0.598581
2329	F1RN44	LAMP1	Lysosomal associated membrane protein 1 OS=Sus scrofa OX=9823 GN=LAMP1 PE=1 SV=2	1.038	0.909	1.046	0.91	0.954	0.633	0.994	1.091	1.011	0.975	0.946	1.047	1.103	0.747	0.85	0.956	0.945	1.055	0.981	0.879	1.216	0.972	1.135	1.042	0.947	0.925	1.073	9	9	9	0.936314	0.277591	-0.0949356	0.556595	0.940458	0.25262	-0.0885646	0.597533
2939	F1SBH1	DTD1	D-aminoacyl-tRNA deacylase OS=Sus scrofa OX=9823 GN=DTD1 PE=1 SV=2	1.086	0.894	0.901	1.124	1.032	1.048	0.944	0.791	0.9	1.143	1.198	0.913	1.036	1.154	1.159	0.985	0.935	0.915	0.879	1.04	0.956	0.952	0.925	1.227	0.919	0.882	1.081	9	9	9	0.984088	0.768854	-0.0231414	0.114156	1.06512	0.252965	0.0910116	0.59694
2182	A0A4X1U5W0	MFGE8	Milk fat globule EGF and factor V/VIII domain containing OS=Sus scrofa OX=9823 GN=MFGE8 PE=1 SV=1	1.141	1.057	1.098	1.255	1.012	1.041	1.034	1.019	0.926	1.042	0.87	0.925	1.021	0.837	1.036	0.809	1.065	0.865	0.991	0.995	0.916	0.98	1.19	1.044	0.853	0.99	0.994	9	9	9	1.07037	0.126695	0.0981062	0.897239	0.946052	0.253053	-0.0800092	0.596788
1978	A0A287BIR3	DCAF7	DDB1 and CUL4 associated factor 7 OS=Sus scrofa OX=9823 GN=DCAF7 PE=1 SV=2	1.107	1.233	1.074	0.978	0.889	1.088	1.059	1.116	1.115	0.971	1.045	0.798	0.899	0.989	0.918	1.023	0.919	1.027	0.852	1.07	0.9	1.095	0.962	1.041	1.026	1.172	0.931	9	9	9	1.06741	0.166537	0.0941155	0.778489	0.949166	0.253619	-0.0752682	0.595818
542	A0A287AZ21	TRIP13	Pachytene checkpoint protein 2 homolog OS=Sus scrofa OX=9823 GN=TRIP13 PE=3 SV=1	1.067	0.911	0.774	1.019	1.089	1.12	1.005	0.844	0.783	1.058	0.68	0.828	1.19	1.016	1.031	0.996	1.001	0.946	0.951	1.126	0.863	1.062	1.236	1.113	0.886	0.94	1.348	9	9	9	0.904147	0.169993	-0.145371	0.76957	0.918215	0.254013	-0.123096	0.595144
2031	A0A5G2R420	PELP1	Proline, glutamate and leucine rich protein 1 OS=Sus scrofa OX=9823 GN=PELP1 PE=1 SV=2	0.946	1.004	1.062	0.997	1.009	0.911	1.058	1.154	1.257	0.885	0.918	0.954	0.852	0.793	0.95	1.021	1.022	1.044	0.858	0.941	0.903	0.891	1.114	1.141	0.98	1.037	1.039	9	9	9	1.05548	0.275888	0.0779002	0.559267	0.947776	0.254482	-0.0773815	0.594344
894	I3LQZ5	RPS6KA5	Ribosomal protein S6 kinase A5 OS=Sus scrofa OX=9823 GN=RPS6KA5 PE=1 SV=2	1.197	1.116	1.858	1.213	0.701	0.695	1.053	1.36	1.224	1.342	1.188	0.884	0.73	0.756	0.895	1.429	1.224	0.477	1.273	1.101	1.022	0.872	0.972	0.91	4.365	0.917	1.737	9	9	9	0.791024	0.453581	-0.338206	0.343345	0.677728	0.254819	-0.561222	0.593768
1877	P80015	AZU1	Azurocidin OS=Sus scrofa OX=9823 GN=AZU1 PE=1 SV=2	0.866	1.037	0.764	1.927	0.866	0.642	0.888	0.883	1.003	0.886	0.949	1.111	0.728	0.931	1.315	1.658	1.623	0.917	0.866	0.988	0.938	0.877	0.889	1.415	1.007	0.75	1.018	9	9	9	1.01463	0.919976	0.0209564	0.0362233	1.15661	0.255019	0.209899	0.593427
2191	A0A4X1VLW1	CCDC86	Coiled-coil domain-containing protein 86 OS=Sus scrofa OX=9823 GN=CCDC86 PE=4 SV=1	0.875	0.919	0.892	0.94	0.972	0.818	1.023	0.87	0.81	1.093	0.982	1.161	1.272	1.049	0.956	1.058	1.03	0.917	0.95	1.02	0.93	0.924	0.923	1.118	0.953	0.935	1.226	9	9	9	0.904221	0.0411401	-0.145253	1.38573	1.06003	0.255229	0.0841037	0.59307
2824	Q69GF7	MT-CO2	Cytochrome c oxidase subunit 2 OS=Sus scrofa OX=9823 GN=MT-CO2 PE=1 SV=1	1.125	0.932	0.901	0.834	0.984	0.765	0.996	0.973	0.848	1.037	0.894	1.004	1.119	0.762	0.779	0.782	1.017	0.93	0.941	0.937	1.167	0.912	1.261	0.948	0.762	0.863	1.418	9	9	9	0.90759	0.255298	-0.139887	0.592952	0.903898	0.255749	-0.145768	0.592187
818	F1SM17	UGT1A6	glucuronosyltransferase OS=Sus scrofa OX=9823 GN=UGT1A6 PE=1 SV=3	0.935	0.754	0.793	0.862	0.993	0.913	1.078	1.17	1.228	0.927	0.858	0.828	1.031	1.124	0.944	0.953	0.974	0.967	0.876	1.111	0.975	0.905	1.038	1.091	0.997	1.12	0.937	9	9	9	0.964199	0.572694	-0.0525973	0.242078	0.950939	0.256346	-0.072575	0.591173
2221	A0A5G2RLP2	LGALS3BP	Galectin-3-binding protein OS=Sus scrofa OX=9823 GN=LGALS3BP PE=4 SV=1	0.969	1.112	1.166	0.986	0.977	0.866	0.933	1.123	1.316	0.917	0.934	1.058	1.011	0.747	0.826	0.88	1.001	0.853	0.984	1.098	1.125	1.018	0.693	1.163	0.879	0.732	1.424	9	9	9	1.03642	0.684588	0.051608	0.164571	0.902479	0.256443	-0.148034	0.59101
536	Q56VC2	FADD	FAS-associated death domain protein OS=Sus scrofa OX=9823 GN=FADD PE=1 SV=1	1.06	0.972	0.945	0.939	0.774	0.944	0.949	0.885	1.027	1.061	0.743	0.794	0.831	0.816	0.963	1.067	0.99	0.9	0.925	0.961	0.919	0.777	0.996	1.221	0.956	0.971	1.027	9	9	9	0.970524	0.555759	-0.0431636	0.255113	0.932823	0.25671	-0.100325	0.590558
1202	A0A287BNE4	UBE2M	Ubiquitin conjugating enzyme E2 M OS=Sus scrofa OX=9823 GN=UBE2M PE=1 SV=3	1.038	1.046	0.998	0.846	0.969	0.931	1.016	0.96	0.936	1.027	0.929	1.005	1.046	1.071	0.994	0.921	0.955	0.898	1.024	1.04	0.955	0.846	0.934	0.964	0.92	0.933	0.937	9	9	9	1.02186	0.473556	0.0312027	0.324629	1.03426	0.257132	0.0485947	0.589843
2814	A0A286ZX31	TBL2	Transducin beta like 2 OS=Sus scrofa OX=9823 GN=TBL2 PE=1 SV=3	0.969	0.942	0.977	1.023	0.94	0.98	1.052	1.026	1.007	1.02	0.927	0.903	0.923	0.897	1.02	1.048	1.012	1.068	0.853	0.982	1.038	1.072	0.991	1.087	1.049	1.094	1.004	9	9	9	0.972301	0.332609	-0.0405251	0.478066	0.961614	0.257239	-0.0564703	0.589662
1343	I3LUD1	SOD3	Superoxide dismutase [Cu-Zn] OS=Sus scrofa OX=9823 GN=SOD3 PE=1 SV=2	0.97	0.95	0.867	0.874	0.883	0.778	1.016	1.062	0.98	0.976	1.395	0.83	0.998	0.913	0.978	1.041	1.027	0.944	0.953	0.963	1.057	0.833	0.801	0.931	0.897	0.946	1.076	9	9	9	0.990895	0.841363	-0.0131957	0.0750166	1.07627	0.257775	0.106038	0.58876
2863	Q29058	LGALS4	Galectin-4 OS=Sus scrofa OX=9823 GN=LGALS4 PE=2 SV=1	1.049	0.939	1.035	0.919	0.978	0.959	0.962	0.992	1.124	1.003	0.945	0.867	1.021	0.961	0.85	0.978	0.902	0.89	1.042	0.924	1.165	0.885	1.053	0.988	0.956	0.971	0.84	9	9	9	1.01507	0.709392	0.0215828	0.149114	0.953876	0.257935	-0.0681267	0.588491
776	A0A287BL76	NUP37	Nucleoporin 37 OS=Sus scrofa OX=9823 GN=NUP37 PE=4 SV=2	1.051	0.937	1.075	1.109	1.023	1.11	1.153	1.231	1.138	0.998	0.918	1.157	0.944	0.908	1.099	0.933	0.935	1.006	0.985	0.989	0.961	1.058	1.133	1.059	1.054	0.978	1.045	9	9	9	1.061	0.0821528	0.0854273	1.08538	0.9607	0.258304	-0.0578427	0.587869
131	I3LH62	FXR1	RNA-binding protein FXR1 OS=Sus scrofa OX=9823 GN=FXR1 PE=1 SV=1	1.076	0.863	0.776	1.083	0.895	1.049	1.042	0.979	0.972	0.876	0.782	0.816	1.04	1.043	1.021	0.944	0.95	1.037	0.917	0.987	0.943	0.937	1.134	1.003	0.917	1.041	1.073	9	9	9	0.97576	0.587672	-0.0354023	0.230865	0.950514	0.259186	-0.0732204	0.586389
2848	A0A287AI94	FAM120A	Constitutive coactivator of PPAR-gamma-like protein 1 isoform b OS=Sus scrofa OX=9823 GN=FAM120A PE=1 SV=1	1.079	1.004	1.031	1.128	1.108	1.018	1.01	1.043	0.965	0.999	0.882	0.975	0.928	1.043	0.953	0.977	0.863	0.982	1.025	1.023	1.066	0.858	1.007	0.936	0.971	1.021	0.988	9	9	9	1.0552	0.0602098	0.0775159	1.22033	0.96706	0.25959	-0.0483225	0.585711
1323	A0A286ZI80	TCF4	Transcription factor 4 OS=Sus scrofa OX=9823 GN=TCF4 PE=4 SV=3	1.333	1.811	1.708	1.235	1.18	1.498	1.201	1.39	1.403	1.494	2.037	1.514	1.109	1.238	1.176	1.372	1.231	1.164	0.861	1.242	1.084	1.175	1.304	1.038	1.101	1.296	1.842	9	9	9	1.16595	0.104946	0.221507	0.979034	1.1272	0.259995	0.172749	0.585035
1569	F1S850	AS3MT	Arsenite methyltransferase OS=Sus scrofa OX=9823 GN=AS3MT PE=1 SV=3	0.973	0.989	0.976	0.79	1.065	1.03	0.922	0.764	0.808	1.062	0.968	0.88	1	0.949	0.88	0.89	0.921	0.993	1.003	1.141	0.989	1.074	0.865	0.908	0.906	1.045	0.993	9	9	9	0.931981	0.172544	-0.101627	0.763101	0.957306	0.260089	-0.0629477	0.584879
2918	A0A287AEY1	SRBD1	S1 RNA binding domain 1 OS=Sus scrofa OX=9823 GN=SRBD1 PE=1 SV=3	1.062	0.976	0.967	1.108	1.13	0.922	1.311	1.561	1.662	1.012	0.961	0.923	1.028	0.774	1.026	1.33	1.271	1.158	1.066	1.087	0.938	0.925	1.195	1.037	1.504	1.453	1.226	9	9	9	1.02569	0.794987	0.0365985	0.0996401	0.909117	0.260235	-0.137462	0.584634
2382	A0A5G2R0Y2	COL6A6	Collagen type VI alpha 6 chain OS=Sus scrofa OX=9823 GN=COL6A6 PE=1 SV=2	0.873	1.007	1.026	0.913	0.989	0.882	1.155	1.091	0.909	0.96	1.117	0.96	0.969	0.902	0.901	1.113	0.989	0.817	0.925	1.043	0.899	0.984	0.928	1.086	0.979	1.13	1.688	9	9	9	0.915442	0.321788	-0.12746	0.49243	0.903333	0.260418	-0.146671	0.584328
2214	A0A8W4FC05	CD300LF	Ig-like domain-containing protein OS=Sus scrofa OX=9823 GN=CD300LF PE=4 SV=1	1.003	0.825	0.935	0.877	0.996	0.931	0.923	0.779	0.839	0.907	1.015	0.837	1.058	1.196	1.132	0.883	0.92	0.9	0.805	1.137	0.896	0.776	0.751	0.975	0.891	0.828	1.127	9	9	9	0.990472	0.875546	-0.0138126	0.0577209	1.08087	0.261087	0.112193	0.583215
558	I3LSJ4	SF3B3	Splicing factor 3B subunit 3 OS=Sus scrofa OX=9823 GN=SF3B3 PE=1 SV=3	1.045	1.037	1.139	1.104	1.077	1.097	1.001	0.916	1.013	1.021	0.972	0.962	1	0.925	1.021	0.965	1.007	1.002	0.976	1.037	1.03	1.053	1.145	1.023	0.961	0.974	0.929	9	9	9	1.03298	0.293558	0.046806	0.532306	0.972283	0.261437	-0.0405517	0.582633
2949	A0A287BIS7	CABIN1	Calcineurin binding protein 1 OS=Sus scrofa OX=9823 GN=CABIN1 PE=4 SV=3	1.163	1.197	1.312	1.41	1.177	1.132	0.922	0.887	0.635	1.039	1.253	1.038	1.259	1.091	1.395	1.133	1.152	1.171	1.094	1.073	1.133	1.06	0.989	0.99	0.886	0.971	1.55	9	9	9	1.00913	0.923788	0.0131148	0.0344277	1.08055	0.261504	0.11176	0.582522
917	A0A287A6K7	APMAP	Adipocyte plasma membrane-associated protein OS=Sus scrofa OX=9823 GN=APMAP PE=1 SV=1	1.067	1.148	1.065	1.108	1.076	0.958	1.047	0.95	1.009	0.973	0.938	0.967	1.016	0.825	1.097	1.001	0.964	0.917	0.991	0.939	0.992	1.013	1.082	1.08	0.975	0.965	0.974	9	9	9	1.04628	0.111249	0.0652645	0.953706	0.965265	0.261802	-0.0510035	0.582027
2624	F1SVB2	RETSAT	All-trans-retinol 13,14-reductase OS=Sus scrofa OX=9823 GN=RETSAT PE=1 SV=1	0.954	1.024	1.065	1.002	1.019	0.992	1.063	1.22	1.211	1.053	0.889	0.988	0.966	0.914	0.935	1.022	1.038	1.071	0.995	1.06	1.065	0.991	1.15	0.996	0.949	0.919	1.091	9	9	9	1.03624	0.364318	0.05136	0.43852	0.963108	0.262279	-0.054231	0.581236
1239	A0A4X1V764	EPB42	Erythrocyte membrane protein band 4.2 OS=Sus scrofa OX=9823 GN=EPB42 PE=1 SV=1	0.914	1.005	1.007	0.973	0.904	0.869	0.873	0.98	0.974	0.893	0.939	0.795	1.044	0.909	0.896	0.882	0.82	1.303	0.673	0.908	0.916	1.208	1.137	1.206	0.851	1.609	1.068	9	9	9	0.887531	0.22772	-0.17213	0.6426	0.885652	0.262355	-0.175189	0.58111
1851	F1SJW8	SERPING1	Plasma protease C1 inhibitor OS=Sus scrofa OX=9823 GN=SERPING1 PE=1 SV=1	0.867	1.209	1.265	1.297	1.246	1.224	1.199	1.268	1.221	0.821	1.01	0.794	1.054	1.194	1.085	1.034	1.054	1.085	0.845	0.837	1.043	1.466	1.21	1.128	1.212	1.091	1.11	9	9	9	1.0859	0.239384	0.118889	0.620905	0.918427	0.262408	-0.122763	0.581023
2782	A0A287A6D5	MIA2	CTAGE family member 5 isoform X2 OS=Sus scrofa OX=9823 GN=MIA2 PE=1 SV=1	0.992	0.964	0.968	1.079	1.12	1.082	1.105	1.012	1.035	0.977	0.828	0.857	1.151	1.136	1.056	1.049	0.991	0.93	0.876	1.107	0.932	1.056	1.235	1.025	1.047	1.019	1.275	9	9	9	0.977539	0.622395	-0.0327743	0.205934	0.937631	0.262504	-0.0929085	0.580864
2431	F1SBF6	TP53RK	non-specific serine/threonine protein kinase OS=Sus scrofa OX=9823 GN=TP53RK PE=1 SV=3	0.724	1.359	1.174	1.391	1.452	0.557	1.544	1.997	1.709	0.877	1.017	1.168	0.912	0.433	0.645	1.058	1.193	1.466	1.257	0.751	0.975	0.873	1.369	1.068	1.039	1.063	2.266	9	9	9	1.11687	0.522611	0.159467	0.281822	0.822531	0.262614	-0.281859	0.580682
3066	A0A4X1UGL0	MIEN1	Migration and invasion enhancer 1 OS=Sus scrofa OX=9823 GN=MIEN1 PE=1 SV=1	1.008	1.079	0.904	1.001	0.931	1.051	0.949	0.947	0.852	1.025	1.238	0.941	0.993	1.128	1.047	0.914	0.931	0.84	1.001	1.245	0.87	0.889	0.733	0.793	0.938	0.898	1.022	9	9	9	1.03969	0.514755	0.0561601	0.288399	1.07963	0.262714	0.110534	0.580517
2143	Q2VTP6	FKBP1A	peptidylprolyl isomerase OS=Sus scrofa OX=9823 GN=FKBP1A PE=1 SV=2	0.938	0.809	0.855	0.955	0.858	1.018	0.874	0.697	0.74	1.275	0.97	0.883	1.008	1.032	1.006	1.143	1.077	0.894	1.16	1	0.903	0.898	0.723	1.032	1.022	1.001	0.952	9	9	9	0.891037	0.0631645	-0.166443	1.19953	1.06869	0.262723	0.0958458	0.580501
1778	A0A286ZXE4	ABCB7	Iron-sulfur clusters transporter ABCB7, mitochondrial OS=Sus scrofa OX=9823 GN=ABCB7 PE=1 SV=1	0.895	1.111	0.939	1.14	1.115	0.817	1.069	1.007	0.919	0.986	0.67	0.994	1.033	0.763	0.69	0.927	1.054	0.915	0.908	0.871	0.966	0.948	1.792	1.016	0.94	1.042	0.734	9	9	9	0.977758	0.836353	-0.0324499	0.0776106	0.871433	0.262799	-0.198538	0.580376
2397	A0A286ZTN4	NIPSNAP2	Nipsnap homolog 2 OS=Sus scrofa OX=9823 GN=NIPSNAP2 PE=1 SV=1	0.849	0.856	0.898	0.818	0.853	0.988	1.003	0.878	0.949	1.114	0.894	0.913	0.98	1.048	0.981	0.969	0.987	0.904	0.893	1.084	0.966	0.686	0.773	1.018	1.005	0.971	0.886	9	9	9	0.977059	0.663563	-0.0334829	0.178118	1.06134	0.262846	0.085884	0.580299
808	I3LDA5	EHD4	EH domain containing 4 OS=Sus scrofa OX=9823 GN=EHD4 PE=1 SV=2	1.021	0.924	0.89	0.986	0.924	1.016	0.974	0.892	1.042	0.993	1.056	0.937	0.995	1	1.034	1.135	0.948	0.921	0.921	1.029	1.023	0.966	0.929	1.115	1.233	1.129	1.107	9	9	9	0.91716	0.0478305	-0.124754	1.32029	0.95419	0.262893	-0.0676521	0.580222
2554	A0A287BPG3	NAGA	Alpha-galactosidase OS=Sus scrofa OX=9823 GN=NAGA PE=1 SV=1	1.047	0.984	1.001	1.038	1.054	0.962	0.979	0.925	0.912	1.061	1.077	1.063	1.098	1.108	1.005	1.037	0.946	0.934	1.077	1.069	1.121	0.962	1.048	1.233	0.974	1.062	1.149	9	9	9	0.918205	0.0184218	-0.123111	1.73467	0.962249	0.262994	-0.0555185	0.580055
981	P14287	SPP1	Osteopontin OS=Sus scrofa OX=9823 GN=SPP1 PE=1 SV=1	1.137	1.047	1.062	0.862	1.082	0.793	1.003	1.032	0.956	1.077	0.936	1.108	1.333	1.026	0.876	0.883	1.018	1.131	0.954	0.896	0.998	0.882	1.203	0.914	1.049	1.005	0.867	9	9	9	1.02349	0.658462	0.0335034	0.181469	1.07071	0.263346	0.09857	0.579473
1077	F1SA24	RDH11	Retinol dehydrogenase 11 OS=Sus scrofa OX=9823 GN=RDH11 PE=1 SV=4	0.962	1.063	1.106	1.129	1.314	1.009	1.136	1.196	1.152	0.791	0.737	0.846	0.994	0.972	0.933	0.985	1.049	0.986	0.963	0.76	1.289	0.878	1.053	0.963	1.125	0.885	1.031	9	9	9	1.12518	0.0643911	0.170158	1.19117	0.926903	0.263377	-0.10951	0.579421
1184	F1SKY2	NIT2	Omega-amidase NIT2 OS=Sus scrofa OX=9823 GN=NIT2 PE=1 SV=3	1.068	1.024	1.153	1.036	1.113	1.244	1.004	0.811	0.795	1.111	0.877	1.033	0.989	1.092	1.052	1.056	1.043	1.043	0.985	0.904	1.034	0.931	1.057	0.998	0.949	1.044	1.078	9	9	9	1.02984	0.585952	0.042426	0.232138	1.03519	0.263819	0.0498946	0.578695
2068	A0A480HW11	SLC12A2	Solute carrier family 12 member 2 OS=Sus scrofa OX=9823 GN=SLC12A2 PE=1 SV=1	0.986	0.93	0.948	0.901	0.903	0.815	0.987	1.022	1.015	0.994	0.999	0.909	0.925	0.941	0.943	1.103	0.93	0.958	1.021	1	0.987	0.848	0.975	1.13	1.02	0.961	1.12	9	9	9	0.938755	0.105271	-0.091179	0.977692	0.960274	0.263935	-0.0584825	0.578503
247	A0A4X1SUH2	GPX1	Glutathione peroxidase OS=Sus scrofa OX=9823 GN=GPX1 PE=3 SV=1	0.983	0.96	1.116	1.03	1.109	1.19	1.102	1.317	1.224	0.987	0.994	0.949	0.99	1.141	1.135	1.002	1.073	1.051	0.93	1.014	0.936	0.975	1.047	0.755	1.154	1.049	1.01	9	9	9	1.13089	0.0274963	0.177459	1.56073	1.05096	0.26436	0.0717054	0.577804
544	P05027	ATP1B1	Sodium/potassium-transporting ATPase subunit beta-1 OS=Sus scrofa OX=9823 GN=ATP1B1 PE=1 SV=2	1.032	0.933	0.958	0.772	0.95	1.216	1.005	0.841	0.905	0.99	1.296	0.847	1.076	1.204	0.876	1.127	0.933	0.934	0.967	1.034	1.001	0.995	0.906	0.725	0.982	1.18	0.781	9	9	9	1.00478	0.941946	0.00688478	0.025974	1.08307	0.264741	0.115128	0.577178
1218	A0A287ANM8	GATD3	Glutamine amidotransferase class 1 domain containing 3 OS=Sus scrofa OX=9823 GN=GATD3 PE=4 SV=3	1.06	0.961	0.937	0.985	0.997	0.748	1.081	0.987	0.949	0.894	0.957	1.002	1.04	0.837	0.91	0.878	0.976	0.988	0.911	0.918	1.08	0.878	0.998	1.091	0.914	0.941	1.184	9	9	9	0.976444	0.628084	-0.0343905	0.201982	0.95143	0.265111	-0.0718303	0.576572
1503	A0A5G2QHL2	ACOT9	Acyl-CoA thioesterase 9 OS=Sus scrofa OX=9823 GN=ACOT9 PE=1 SV=1	1.001	1.021	1.059	1.125	1.028	1.001	1.042	1.135	1.263	1.007	0.867	0.914	0.887	0.914	0.995	1.118	1.048	1.134	0.813	0.971	0.961	1.061	1.14	1.205	1.073	1.297	0.975	9	9	9	1.01885	0.729656	0.0269417	0.136882	0.935552	0.265436	-0.0961105	0.576039
834	A0A287BAQ0	RBM39	RNA binding motif protein 39 OS=Sus scrofa OX=9823 GN=RBM39 PE=1 SV=1	1.158	1.087	0.985	1.09	1.069	1.108	1.119	1.032	1.255	1.082	0.874	0.977	1.033	1.12	1.024	0.951	1.113	0.964	0.943	1.026	1.038	0.912	1.149	1.243	1.002	1.025	1.613	9	9	9	0.995176	0.945523	-0.00697587	0.024328	0.9183	0.265609	-0.122963	0.575758
703	A0A287A976	COPS5	COP9 signalosome subunit 5 OS=Sus scrofa OX=9823 GN=COPS5 PE=1 SV=2	1.162	1.115	1.162	0.958	0.94	1.101	1.313	1.434	1.383	1.133	1.207	1.102	1.107	0.828	0.931	1.113	1.153	1.321	1.077	1.082	1.24	0.934	1.025	0.756	1.137	1.141	0.702	9	9	9	1.16208	0.0675878	0.216715	1.17013	1.08808	0.266222	0.121785	0.574756
2005	A0A287A8J7	RRM1	Ribonucleoside-diphosphate reductase OS=Sus scrofa OX=9823 GN=RRM1 PE=1 SV=2	1.03	1.037	1.077	0.961	1.054	1.083	1.226	1.223	1.099	1.05	0.85	0.921	1.007	0.891	1.007	1.276	1.105	1.226	0.925	1.029	0.948	0.992	1.381	1.094	1.07	1.261	1.489	9	9	9	0.96084	0.553682	-0.0576317	0.25674	0.915988	0.266245	-0.1266	0.574718
1321	F1RWZ2	PRP4K	Serine/threonine-protein kinase PRP4 homolog OS=Sus scrofa OX=9823 GN=PRP4K PE=1 SV=4	0.851	0.905	0.791	1.058	0.963	0.907	1.015	0.998	1.049	1.427	0.949	3.609	1.189	1.06	1.049	0.964	0.987	0.942	0.96	1.014	1.141	0.924	1.02	1.114	1.054	1.098	0.752	9	9	9	0.940509	0.250411	-0.0884864	0.601347	1.34141	0.267064	0.423753	0.573385
593	A0A287ABP3	PRMT9	Protein arginine N-methyltransferase 9 isoform 1 OS=Sus scrofa OX=9823 GN=PRMT9 PE=1 SV=1	1.232	1.03	0.936	1.01	0.965	0.962	0.958	1.005	1.038	0.998	0.873	1.052	1.03	0.907	0.875	1.049	0.857	0.849	0.996	1.018	0.936	0.805	1.137	1.239	0.84	0.973	1.122	9	9	9	1.00772	0.890641	0.0110965	0.0502972	0.936466	0.2671	-0.0947016	0.573326
886	F1SUG7	DDX21	RNA helicase OS=Sus scrofa OX=9823 GN=DDX21 PE=1 SV=3	1.063	1.057	1.009	1.122	0.996	1.266	1.019	1.034	1.053	0.928	0.865	0.906	0.943	1.056	1.022	1.01	0.979	0.957	0.943	0.961	0.927	1.05	1.238	0.967	0.942	0.943	1.121	9	9	9	1.05796	0.212045	0.0812892	0.673571	0.953146	0.267221	-0.0692314	0.573129
1774	A0A5S6GBZ7	CAPN1	Calpain-1 catalytic subunit OS=Sus scrofa OX=9823 GN=CAPN1 PE=3 SV=1	1.011	0.966	0.998	1.043	0.958	0.976	0.97	1.075	1.075	0.976	0.962	0.962	0.945	0.957	0.992	0.974	0.957	0.928	0.96	1.016	0.98	0.896	0.961	1.228	0.965	1.011	0.972	9	9	9	1.00923	0.793914	0.01326	0.100226	0.962621	0.267483	-0.0549602	0.572704
2258	A0A8D0TY40	RBMX	RNA binding motif protein X-linked OS=Sus scrofa OX=9823 GN=RBMX PE=1 SV=1	1.032	1.258	1.183	1.103	1.177	0.757	1.047	1.157	0.935	0.955	1.109	1.095	1.099	0.736	0.872	0.747	0.988	1.032	1.108	0.973	1.109	0.898	1.194	1.165	0.839	0.823	1.284	9	9	9	1.02725	0.71007	0.0387934	0.148699	0.919089	0.267974	-0.121724	0.571908
2262	F1S8P9	ADD1	Adducin 1 OS=Sus scrofa OX=9823 GN=ADD1 PE=1 SV=5	1.06	0.978	0.912	0.867	1.045	0.932	1.03	0.989	1.017	0.95	0.96	0.922	1.039	1.046	0.991	1.005	0.98	1.034	0.912	0.982	0.994	0.97	0.819	0.913	0.962	1.092	0.985	9	9	9	1.02329	0.508454	0.0332201	0.293749	1.03453	0.268713	0.048982	0.570711
2887	A0A287A7Q7	EIF5	Eukaryotic translation initiation factor 5 OS=Sus scrofa OX=9823 GN=EIF5 PE=3 SV=1	1.05	0.958	0.94	0.982	0.902	0.875	1.039	1.083	1.179	1.024	0.908	0.95	0.984	0.875	0.94	0.989	0.934	0.956	1.035	1.018	1.01	0.828	1.005	1.149	0.979	1.037	0.866	9	9	9	1.00907	0.844365	0.0130314	0.0734696	0.958889	0.268808	-0.0605646	0.570559
819	A0A287B6A9	ARHGEF2	Rho guanine nucleotide exchange factor 2 OS=Sus scrofa OX=9823 GN=ARHGEF2 PE=4 SV=3	1.035	1.016	0.911	1.138	0.911	0.969	1.052	1.016	1.072	0.974	0.876	0.955	1.02	0.962	1.005	0.893	1.008	0.948	0.973	0.978	0.971	0.897	1.205	1.167	0.865	0.955	1.07	9	9	9	1.00429	0.92596	0.00618265	0.0334076	0.951547	0.269034	-0.0716529	0.570193
1124	F1RQS5	CDC5L	Cell division cycle 5 like OS=Sus scrofa OX=9823 GN=CDC5L PE=1 SV=3	1.072	0.94	1.055	1.034	0.954	1.011	0.977	1.025	1.12	1.091	0.883	0.994	1.006	0.968	1.081	0.868	0.954	0.848	0.997	0.982	1.036	0.87	1.094	1.137	0.855	0.982	1.312	9	9	9	0.991689	0.868725	-0.0120401	0.0611177	0.938262	0.269046	-0.0919368	0.570174
2345	K7GLB5	PPT2	Palmitoyl-protein thioesterase 2 OS=Sus scrofa OX=9823 GN=PPT2 PE=1 SV=1	0.88	1.244	1.15	1.107	1.045	1.129	1.224	1.27	1.21	0.979	1.043	0.813	0.943	1.075	0.974	1.09	1.155	1.267	1.027	0.992	0.996	1.812	1.21	0.962	1.24	1.253	0.915	9	9	9	0.985779	0.873432	-0.0206641	0.0587709	0.897377	0.269311	-0.156214	0.569746
1522	F1RZ35	F8A1	Factor VIII intron 22 protein OS=Sus scrofa OX=9823 GN=F8A1 PE=1 SV=1	1.05	1.012	1	1.029	1.049	0.869	1.027	0.961	1.013	1.029	0.844	1.013	1.235	0.992	0.967	1.002	1.059	0.94	0.898	1.046	0.94	0.982	1.172	1.382	0.946	1.047	1.446	9	9	9	0.913886	0.201733	-0.129914	0.695222	0.921087	0.269588	-0.11859	0.569299
2910	A0A286ZWY2	ACTMAP	Actin maturation protease OS=Sus scrofa OX=9823 GN=ACTMAP PE=3 SV=1	1.073	0.993	0.904	0.913	0.822	0.917	1.156	0.84	0.845	1.28	1.115	0.987	0.99	0.946	1.043	1.083	1.12	0.952	1.012	1.055	1.061	0.967	0.839	0.996	0.916	0.978	1.193	9	9	9	0.93856	0.238026	-0.0914784	0.623375	1.05534	0.269834	0.0777078	0.568904
256	I3LS60	NAXD	ATP-dependent (S)-NAD(P)H-hydrate dehydratase OS=Sus scrofa OX=9823 GN=NAXD PE=1 SV=2	1.12	1.06	1.046	1.067	1	1.139	1.056	1.079	1.106	1.074	1.042	1.012	1.049	1.163	1.069	1.001	0.973	0.972	0.896	1.124	0.989	1.022	1.083	0.922	0.997	0.975	1.027	9	9	9	1.07061	0.0237965	0.0984388	1.62349	1.03542	0.270215	0.0502131	0.56829
464	I3L7Y1	RPL26	Large ribosomal subunit protein uL24 OS=Sus scrofa OX=9823 GN=RPL26 PE=1 SV=1	0.907	1.619	1.291	1.407	1.452	0.955	0.989	1.266	1.108	0.849	1.053	1.082	1.015	0.74	0.85	0.721	0.81	1.062	1.2	0.951	1.049	0.97	1.186	0.908	0.93	0.759	0.917	9	9	9	1.23946	0.0274586	0.30971	1.56132	0.922435	0.270435	-0.116481	0.567936
1769	F2Z546	RPL19	Large ribosomal subunit protein eL19 OS=Sus scrofa OX=9823 GN=RPL19 PE=1 SV=4	1.041	1.086	1.082	1.004	1.09	0.752	0.94	0.962	0.834	1.076	0.947	1.005	1.166	0.864	0.919	0.765	0.857	0.817	1.206	1.022	1.105	0.916	1.297	1.116	0.902	0.818	0.784	9	9	9	0.959088	0.566206	-0.060265	0.247025	0.918176	0.270648	-0.123158	0.567594
2135	Q9TSX9	PRDX6	Peroxiredoxin-6 OS=Sus scrofa OX=9823 GN=PRDX6 PE=2 SV=3	1.067	0.874	1.001	1.136	1.061	1.16	1.029	0.862	0.857	1.053	0.961	0.99	0.978	1.076	1.186	0.994	0.997	0.918	0.842	1.045	0.859	0.881	1.059	0.998	1.114	1.076	0.782	9	9	9	1.04517	0.449347	0.063739	0.347418	1.05742	0.271308	0.0805442	0.566537
587	A0A5G2QDG7	EXOC5	Exocyst complex component 5 OS=Sus scrofa OX=9823 GN=EXOC5 PE=1 SV=1	1.045	1.014	0.985	1.071	1.029	1.047	1.174	0.776	0.881	0.937	0.794	0.84	0.881	0.964	0.949	1.119	1.175	1.145	0.919	1.002	0.948	0.992	1.191	0.899	1.126	1.084	1.303	9	9	9	0.953297	0.418948	-0.0690028	0.37784	0.930262	0.271457	-0.104291	0.566298
932	P63246	RACK1	Small ribosomal subunit protein RACK1 OS=Sus scrofa OX=9823 GN=RACK1 PE=1 SV=3	1.048	1.003	0.996	1.058	1.042	1.09	1.017	1.108	1.065	1.029	0.919	0.97	1.008	0.989	1.021	0.971	1.015	1.005	1.021	0.955	0.996	0.931	1.197	1.133	0.983	1.012	1.018	9	9	9	1.01958	0.529916	0.0279694	0.275793	0.965499	0.271572	-0.0506539	0.566115
1342	A0A5G2Q9H8	MYCBP	MYC binding protein OS=Sus scrofa OX=9823 GN=MYCBP PE=1 SV=2	1.048	1.063	1.053	1.355	1.242	1.241	0.917	1.069	0.969	1.133	1.014	0.963	1.165	0.933	1.157	0.949	0.897	0.941	1.084	1.093	1.022	1.217	1.356	1.422	0.865	0.967	0.893	9	9	9	1.00383	0.958925	0.00551645	0.0182154	0.922674	0.271585	-0.116108	0.566094
2215	A0A287B677	PPP1R18	Phostensin OS=Sus scrofa OX=9823 GN=PPP1R18 PE=4 SV=1	0.985	0.941	0.919	1.081	1.119	0.822	1.016	1.134	1.088	1.002	0.889	0.945	1.091	0.807	0.944	0.92	1.002	0.954	0.992	0.988	0.927	0.832	1.145	1.142	0.893	0.913	1.347	9	9	9	0.991938	0.900203	-0.011678	0.0456598	0.93191	0.272133	-0.101738	0.565218
1355	A0A287ANV0	FCHO2	F-BAR domain only protein 2 OS=Sus scrofa OX=9823 GN=FCHO2 PE=3 SV=2	1.359	1.2	0.894	1.043	0.933	0.98	0.926	0.994	0.913	1.253	1.008	1.143	0.856	0.923	0.959	0.919	0.862	0.685	1.083	1.211	1.248	0.957	0.934	1.081	0.827	0.825	1.252	9	9	9	0.981312	0.802068	-0.0272156	0.095789	0.913994	0.272198	-0.129743	0.565115
129	F2Z5V0	RTCB	RNA-splicing ligase RtcB homolog OS=Sus scrofa OX=9823 GN=RTCB PE=3 SV=1	1.167	0.976	1.031	0.988	1.023	1.084	1.009	1.099	1.066	1.136	0.836	1.02	1.068	1.114	1.056	0.998	0.976	1.027	1.018	1	1.113	0.953	0.915	0.955	0.945	1.104	0.755	9	9	9	1.07821	0.0873457	0.108644	1.05876	1.05401	0.272914	0.0758855	0.563974
1570	A0A287B2K8	KANK2	KN motif and ankyrin repeat domain-containing protein 2 OS=Sus scrofa OX=9823 GN=KANK2 PE=4 SV=2	0.975	0.867	0.915	1.024	0.979	0.972	0.989	0.906	0.945	0.994	0.95	0.886	1.078	1.085	1.057	1.034	1.01	0.996	0.965	1.034	0.944	0.914	0.838	1.036	0.988	0.974	1.072	9	9	9	0.977981	0.46711	-0.0321222	0.33058	1.03708	0.272969	0.0525262	0.563886
1286	I3LI59	RBM8A	RNA-binding protein 8A OS=Sus scrofa OX=9823 GN=RBM8A PE=1 SV=2	0.862	0.887	0.822	0.81	0.819	0.609	1.145	1.083	1.251	0.714	0.764	0.856	0.843	0.531	0.659	0.924	0.943	0.823	0.877	0.674	0.729	0.795	0.84	0.781	0.966	0.993	1.008	9	9	9	1.08156	0.386724	0.113115	0.412599	0.920919	0.272993	-0.118854	0.563848
648	A0A287A496	ALKBH5	RNA demethylase ALKBH5 OS=Sus scrofa OX=9823 GN=ALKBH5 PE=1 SV=1	0.979	0.998	0.987	1.118	1.071	1.041	0.519	0.601	0.633	1.152	0.898	1.048	0.995	0.861	0.925	0.407	0.469	0.503	1.085	1.322	1.04	1.085	1.256	1.316	34.163	0.01	4.725	9	9	9	0.172753	0.280992	-2.53321	0.551306	0.157776	0.273037	-2.66405	0.563778
3074	F1RUH0	HUWE1	HECT-type E3 ubiquitin transferase OS=Sus scrofa OX=9823 GN=HUWE1 PE=1 SV=2	1.018	1.097	1.017	1.059	1.038	1.107	1.033	1.045	1.035	1.002	0.972	0.928	1.048	1.036	1.021	0.932	0.982	0.916	0.992	1.019	0.978	0.965	1.116	1.2	1.01	0.95	0.944	9	9	9	1.02998	0.337127	0.0426107	0.472207	0.963266	0.273327	-0.0539942	0.563318
334	A0A5G2R924	SPTA1	Spectrin alpha, erythrocytic 1 OS=Sus scrofa OX=9823 GN=SPTA1 PE=1 SV=1	0.931	1.206	1.182	1.002	0.898	0.912	0.91	0.967	0.946	0.987	1.06	0.937	0.977	0.859	0.89	1.071	0.942	1.18	0.857	0.994	0.914	1.452	1.173	1.174	1.014	1.074	0.958	9	9	9	0.931738	0.32604	-0.102004	0.486729	0.926431	0.273348	-0.110245	0.563284
301	B2DCZ7	SMAP2	Small ArfGAP2 OS=Sus scrofa OX=9823 GN=SMAP2 PE=1 SV=1	1.025	0.947	0.94	1.032	0.979	1.014	1.04	0.989	1.032	1.139	0.92	0.965	0.982	0.834	1.014	1.116	0.983	0.998	1.054	1.026	1.023	0.858	1.108	1.243	1.075	1.014	1.016	9	9	9	0.955506	0.224197	-0.0656632	0.649369	0.950515	0.273864	-0.0732187	0.562465
1430	F1RIJ5	DNAJC11	DnaJ heat shock protein family (Hsp40) member C11 OS=Sus scrofa OX=9823 GN=DNAJC11 PE=1 SV=3	1.145	1.177	1.087	1.091	1.078	0.888	1.007	1.146	1.158	1.018	1.077	1.262	1.297	1.072	1.218	0.928	0.896	0.829	1.025	0.904	1.148	1.002	0.892	1.199	0.841	0.862	1.014	9	9	9	1.10015	0.0754605	0.137695	1.12228	1.07989	0.274153	0.110887	0.562007
229	A0A287BB68	MYH11	Myosin-11 OS=Sus scrofa OX=9823 GN=MYH11 PE=1 SV=2	0.749	0.984	1.098	0.925	1.087	0.936	0.989	1.079	0.837	0.841	1.062	0.982	1.227	1.154	1.068	0.869	1.149	1.054	0.96	1.159	1.002	0.718	0.768	0.931	1.027	0.788	1.282	9	9	9	1.00567	0.941913	0.00816355	0.0259893	1.08929	0.274232	0.123385	0.561881
446	P63221	RPS21	Small ribosomal subunit protein eS21 OS=Sus scrofa OX=9823 GN=RPS21 PE=1 SV=1	1.025	0.979	1.056	1.028	1.038	0.809	1.084	1.161	1.237	1.114	0.974	0.996	1.039	0.765	0.913	1.002	1.073	1.055	1.176	1.01	1.123	0.987	0.888	1.101	1.034	0.987	1.085	9	9	9	1.00277	0.953854	0.00398874	0.0205179	0.951017	0.274378	-0.0724571	0.561651
2212	I3LS72	COL6A1	Collagen type VI alpha 1 chain OS=Sus scrofa OX=9823 GN=COL6A1 PE=1 SV=3	0.915	1.006	1.004	1.174	0.959	0.862	0.941	0.942	0.967	0.943	1.127	0.971	0.933	1.001	1.216	1.096	1.021	0.955	1.064	0.985	0.965	1.057	0.936	1.007	0.945	1.038	0.87	9	9	9	0.989061	0.768085	-0.0158692	0.114591	1.04466	0.274644	0.0630334	0.56123
2601	A0A287AAH2	PPIL2	RING-type E3 ubiquitin transferase OS=Sus scrofa OX=9823 GN=PPIL2 PE=1 SV=2	1.007	0.852	0.988	1.179	1.064	1.038	0.898	0.839	1.03	1.057	0.769	0.934	0.942	1.017	1.056	0.964	0.907	0.77	1.017	1.081	0.88	1.04	1.105	1.275	0.799	0.91	0.919	9	9	9	0.985486	0.811959	-0.0210922	0.0904658	0.932417	0.274765	-0.100952	0.561039
257	Q29036	DAD1	Dolichyl-diphosphooligosaccharide--protein glycosyltransferase subunit DAD1 OS=Sus scrofa OX=9823 GN=DAD1 PE=3 SV=3	0.993	1.045	1.032	1.084	0.85	0.847	1.032	0.923	1.097	1.014	0.973	0.875	1.066	0.85	0.873	1.099	1.008	1.005	0.916	0.968	1.026	1.127	1.162	1.054	1.012	1.114	0.846	9	9	9	0.965095	0.454326	-0.0512574	0.342632	0.949919	0.275301	-0.0741241	0.560193
1250	A0A5S8LD81	ARG1	Arginase OS=Sus scrofa OX=9823 GN=ARG1 PE=1 SV=1	0.967	0.58	0.61	3.041	1.127	0.863	0.578	0.375	0.394	0.697	0.709	2.303	1.186	0.798	2.604	1.151	0.922	0.537	0.592	0.745	0.733	1.074	1.382	1.326	1.011	0.591	0.698	9	9	9	1.04698	0.88737	0.0662371	0.0518952	1.33795	0.275318	0.420028	0.560165
1395	A0A8W4FIF1	CD9	Tetraspanin OS=Sus scrofa OX=9823 GN=CD9 PE=1 SV=1	0.979	1.037	1.037	0.754	0.967	0.746	0.895	0.764	0.807	0.994	1.01	1.115	1.121	0.862	0.88	0.994	0.931	0.935	1.083	1.067	0.998	0.841	0.798	0.67	1.004	0.868	0.953	9	9	9	0.96426	0.597187	-0.0525061	0.22389	1.06762	0.275436	0.0943935	0.559979
3062	A0A8D1KBT2	CLINT1	Clathrin interactor 1 OS=Sus scrofa OX=9823 GN=CLINT1 PE=1 SV=1	0.922	0.976	0.947	0.915	0.981	0.866	1.022	0.945	1.025	1.047	0.897	0.975	1.036	0.918	0.932	1.047	0.896	0.956	1.014	0.936	0.924	0.965	1.02	1.029	1.103	1.032	0.966	9	9	9	0.956614	0.107952	-0.0639917	0.966769	0.968295	0.27564	-0.0464821	0.559658
2233	F1SC45	ENTPD1	Ectonucleoside triphosphate diphosphohydrolase 1 OS=Sus scrofa OX=9823 GN=ENTPD1 PE=3 SV=3	0.91	1.086	1.032	1.079	1.094	1.196	1.077	1.17	1.27	0.908	0.859	0.86	0.985	1.057	1.017	1.097	1.056	1.081	0.936	1.033	0.979	1.073	1.176	1.03	1.049	1.131	0.934	9	9	9	1.06134	0.167246	0.0858903	0.776645	0.95493	0.27644	-0.0665333	0.558399
318	A0A287A328	RRAS2	Ras-related protein R-Ras2 OS=Sus scrofa OX=9823 GN=RRAS2 PE=4 SV=3	1.091	1.027	0.931	0.966	0.97	1.045	1.013	0.478	0.425	0.946	1.053	0.946	1.053	0.966	1.003	0.877	1.057	0.723	1.02	0.948	1.124	1.061	1	1.169	0.75	0.859	1.56	9	9	9	0.837214	0.148015	-0.256331	0.829695	0.90865	0.276822	-0.138203	0.557799
2267	F1ST73	GRHPR	Glyoxylate and hydroxypyruvate reductase OS=Sus scrofa OX=9823 GN=GRHPR PE=1 SV=3	1.043	1.147	1.165	1.035	1.039	1.131	1.038	1.11	1.044	1.014	1.01	1.075	1.086	0.95	0.955	0.901	0.976	0.974	1.027	0.994	1.073	0.886	1.149	1.085	1.009	0.981	1.061	9	9	9	1.05256	0.0995541	0.0739071	1.00194	0.96503	0.276915	-0.0513548	0.557653
2877	F1RKY1	SNAP29	Synaptosomal-associated protein 29 OS=Sus scrofa OX=9823 GN=SNAP29 PE=1 SV=1	1.059	0.972	0.939	0.874	0.869	0.955	1.066	0.92	1.177	0.938	0.924	0.933	0.977	0.985	0.894	0.983	0.981	0.949	1.006	0.97	1.044	0.882	0.978	0.997	0.897	0.938	1.155	9	9	9	0.99594	0.927798	-0.00586926	0.0325468	0.965828	0.277103	-0.0501613	0.557359
1337	A0A4X1SUA0	SRSF3	Serine and arginine rich splicing factor 3 OS=Sus scrofa OX=9823 GN=SRSF3 PE=1 SV=1	1.06	1.039	1.025	0.942	0.979	0.925	1.004	0.868	0.786	1.021	0.93	0.887	1.073	0.942	0.94	0.837	0.947	0.922	1.026	0.947	1.001	1.027	1.218	1.046	0.961	1.036	0.73	9	9	9	0.95952	0.446986	-0.0596159	0.349706	0.945173	0.277752	-0.0813489	0.556343
2805	A0A286ZUJ0	INF2	Inverted formin-2 OS=Sus scrofa OX=9823 GN=INF2 PE=4 SV=2	0.963	1.357	1.333	0.886	1.014	0.797	0.893	1.053	0.969	1.081	1.829	0.887	0.796	0.76	0.867	1.06	0.871	1.187	0.783	0.812	0.898	0.755	0.64	0.786	0.913	1.076	1.35	9	9	9	1.15625	0.164905	0.209448	0.782767	1.16536	0.277923	0.220771	0.556076
992	F2Z558	YWHAZ	14-3-3 protein zeta/delta OS=Sus scrofa OX=9823 GN=YWHAZ PE=1 SV=4	1.055	0.984	1	0.911	0.994	1.09	1.098	1.047	0.932	0.983	0.975	0.924	0.994	1.253	0.97	1.025	1.002	0.969	0.977	0.938	1.026	0.836	1.029	0.875	1.034	0.973	1.007	9	9	9	1.04784	0.16988	0.0674234	0.769858	1.046	0.278233	0.0648876	0.555591
2229	F1RVC9	HNRNPD	Heterogeneous nuclear ribonucleoprotein D0 isoform a OS=Sus scrofa OX=9823 GN=HNRNPD PE=1 SV=2	1.093	1.299	1.312	0.962	1.085	0.812	1.07	1.176	1.038	0.94	0.945	1.104	0.987	0.861	0.895	0.765	0.903	0.936	1.204	0.925	1.041	0.891	1.029	0.847	0.978	0.85	1.075	9	9	9	1.11391	0.107867	0.155638	0.967113	0.942986	0.278278	-0.0846911	0.555521
623	F1SC53	NCOA5	Nuclear receptor coactivator 5 OS=Sus scrofa OX=9823 GN=NCOA5 PE=1 SV=1	1.182	1.02	0.911	1.166	1.046	0.913	0.966	0.822	0.796	1.06	0.969	0.999	1.13	1.012	1.057	0.905	0.963	0.964	1.048	1.042	1.02	1.035	1.044	1.237	0.868	0.947	1.431	9	9	9	0.912117	0.206446	-0.132708	0.685193	0.936621	0.278374	-0.0944624	0.555372
1539	F1RN10	AUH	AU RNA binding methylglutaconyl-CoA hydratase OS=Sus scrofa OX=9823 GN=AUH PE=1 SV=3	1.093	1.145	1.18	1.044	0.943	1.006	1.102	1.155	1.12	1.097	0.885	0.95	1.087	0.932	0.951	1.06	1.098	1.044	1.113	1.069	1.033	0.877	1.122	1.256	0.97	1.11	1.01	9	9	9	1.02385	0.573842	0.0340035	0.241208	0.952301	0.278408	-0.0705101	0.555318
1400	A0A287A143	MRPL2	Mitochondrial ribosomal protein L2 OS=Sus scrofa OX=9823 GN=MRPL2 PE=1 SV=1	1.108	0.961	0.889	0.969	1.039	0.985	1.013	0.848	0.876	0.989	1.072	0.973	0.922	0.991	1.029	1.024	0.973	0.865	1.072	1.108	0.986	0.898	1.024	1.198	0.845	0.968	1.219	9	9	9	0.932389	0.189229	-0.100996	0.723013	0.948487	0.279028	-0.0763004	0.554352
1576	A0A480EGQ0	PPP1R21	Protein phosphatase 1 regulatory subunit 21 OS=Sus scrofa OX=9823 GN=PPP1R21 PE=1 SV=1	0.996	0.963	0.989	1.042	1.151	0.757	1.08	1.252	1.203	0.98	0.888	0.938	0.92	0.832	0.755	0.993	1.064	1.045	0.967	0.93	0.966	0.844	0.933	1.038	1.071	0.988	1.109	9	9	9	1.06636	0.267612	0.0926914	0.572495	0.951277	0.279605	-0.072062	0.553455
1450	A0A5G2R9K2	MAPK14	mitogen-activated protein kinase OS=Sus scrofa OX=9823 GN=MAPK14 PE=1 SV=2	1.082	0.969	1.04	1.175	1.059	1.199	1.161	1.002	1.078	1.033	0.86	0.985	1.036	1.151	1.11	1.113	1.021	0.981	0.945	0.941	0.979	0.964	1.123	1.011	1.041	1.047	0.84	9	9	9	1.0983	0.0199552	0.135274	1.69994	1.04488	0.27975	0.0633329	0.55323
156	A0A5G2QNS3	MFAP2	Microfibril associated protein 2 OS=Sus scrofa OX=9823 GN=MFAP2 PE=1 SV=1	0.806	0.902	0.995	1.207	1.057	0.837	1.156	1.02	1.077	0.83	0.927	0.804	1.162	0.934	1.059	1.103	1.057	0.883	1.026	0.97	0.812	0.989	0.999	1.331	0.921	1.169	1.238	9	9	9	0.957906	0.543709	-0.0620442	0.264634	0.926388	0.280026	-0.110311	0.552801
2690	I3LCN1	ENO2	phosphopyruvate hydratase OS=Sus scrofa OX=9823 GN=ENO2 PE=1 SV=3	1.056	1.051	1.107	1.136	1.166	1.093	1.009	0.972	1.021	1.026	0.856	1.072	0.946	0.833	0.966	1.037	0.813	0.984	1.233	1.218	1.039	1.05	0.938	0.882	0.963	1.038	0.768	9	9	9	1.0528	0.34326	0.0742297	0.464376	0.934714	0.280047	-0.0974038	0.55277
1947	D0G777	MAT2A	S-adenosylmethionine synthase OS=Sus scrofa OX=9823 GN=MAT2A PE=1 SV=1	1.07	0.935	1.098	1.135	1.038	0.967	1.107	1.145	1.029	1.078	0.857	0.973	0.952	0.956	1.023	0.978	1.023	1	1.022	1.047	1.006	0.893	1.055	1.062	0.96	1.063	1.011	9	9	9	1.04441	0.16214	0.062692	0.790111	0.969405	0.280233	-0.0448293	0.552481
1054	A0A4X1U8F0	ATP5MF	ATP synthase subunit f, mitochondrial OS=Sus scrofa OX=9823 GN=ATP5MF PE=1 SV=1	1.032	0.819	0.851	0.989	0.947	1.159	1.019	1.063	1.176	1.048	0.841	0.851	1.002	1.013	1.086	1.05	1.016	0.99	0.95	1.025	0.991	0.861	1.205	1.285	1.014	1.025	1.06	9	9	9	0.961661	0.505924	-0.0563997	0.295914	0.944881	0.280513	-0.0817954	0.552047
1018	F1SFW7	CRTC2	CREB-regulated transcription coactivator 2 OS=Sus scrofa OX=9823 GN=CRTC2 PE=3 SV=2	1.072	1.099	1.229	1.132	1.095	1.262	1.067	1.661	1.368	1.006	0.896	0.903	0.874	1.031	0.982	0.893	0.818	0.991	0.935	0.927	0.966	0.959	1.185	0.897	0.964	0.812	1.455	9	9	9	1.20714	0.0358173	0.271596	1.44591	0.922418	0.280533	-0.116508	0.552015
1420	Q6QAT0	RPL32	Large ribosomal subunit protein eL32 OS=Sus scrofa OX=9823 GN=RPL32 PE=1 SV=3	0.887	1.361	1.26	0.956	1.126	0.642	0.947	1.206	0.922	0.951	1.142	1.275	0.984	0.65	0.688	0.71	0.864	0.983	1.199	0.84	1.086	0.805	1.382	1.071	0.799	0.737	1.479	9	9	9	0.990317	0.932068	-0.0140376	0.0305524	0.877527	0.280761	-0.188484	0.551664
1045	Q4LE85	RAB27A	Ras-related protein Rab-27A OS=Sus scrofa OX=9823 GN=RAB27A PE=2 SV=1	1.076	1.167	1.312	1.265	1.182	1.165	1.064	1.052	1.126	1.139	1.234	1.096	1.136	1.061	1.057	1.009	1.07	1.023	1.011	0.972	1.185	1.049	1.112	1.113	1.012	1.047	0.998	9	9	9	1.0958	0.0165625	0.131984	1.78087	1.03432	0.281908	0.0486818	0.549892
881	A0A5K1VSC0	WASF2	Wiskott-Aldrich syndrome protein family member OS=Sus scrofa OX=9823 GN=WASF2 PE=1 SV=1	0.91	0.848	0.88	0.921	1.023	0.97	1.064	0.784	0.723	0.99	0.889	0.995	0.982	0.903	1.009	1.008	1.011	1.038	0.882	1.031	0.937	1.107	1.209	0.933	0.946	1.141	1.051	9	9	9	0.879398	0.0294328	-0.185412	1.53117	0.955397	0.281971	-0.0658281	0.549795
2339	K7GLU6	ERAP1	Aminopeptidase OS=Sus scrofa OX=9823 GN=ERAP1 PE=1 SV=4	1.076	1.031	1.329	0.957	1.052	1.362	1.129	0.965	1.074	1.038	1.105	1.026	1.1	1.229	0.966	1.15	1.079	1.077	1.051	1.148	1.079	1.101	1.014	0.887	0.973	1.212	0.812	9	9	9	1.07524	0.243363	0.104658	0.613745	1.05314	0.282437	0.0747002	0.549078
1108	A0A5G2REG7	Protein S100 OS=Sus scrofa OX=9823 PE=3 SV=1	Protein S100 OS=Sus scrofa OX=9823 PE=3 SV=1	1.099	1.229	1.08	0.979	1.008	0.973	1.155	1.065	1.262	1.068	1.043	1.208	0.923	0.796	0.931	1.018	1.074	1.011	1.097	1.019	1.142	0.777	1.056	1.587	0.851	0.933	2.009	9	9	9	0.940693	0.622203	-0.0882036	0.206068	0.866393	0.282619	-0.206907	0.548799
563	I3L7E5	MCM3	DNA replication licensing factor MCM3 OS=Sus scrofa OX=9823 GN=MCM3 PE=1 SV=2	1.077	1.048	1.072	0.972	0.868	0.983	1.081	1.008	0.931	1.197	0.82	0.95	0.922	0.824	0.957	0.821	0.993	0.868	0.948	1.031	0.976	0.935	1.29	1.112	0.821	0.904	0.942	9	9	9	1.00904	0.864719	0.0129851	0.0631249	0.932247	0.282976	-0.101216	0.548251
964	A0A287AIA1	CEP170	Centrosomal protein 170 OS=Sus scrofa OX=9823 GN=CEP170 PE=1 SV=1	1.004	1.004	1.074	1.024	0.952	0.861	0.976	1.146	1.075	1.002	0.877	0.849	0.976	0.846	0.968	0.85	0.962	0.996	0.785	0.885	0.86	1.201	1.122	1.073	0.947	0.966	0.989	9	9	9	1.03262	0.548155	0.0463143	0.261096	0.943135	0.283007	-0.0844631	0.548203
1949	A0A5G2RAI6	PICALM	Phosphatidylinositol binding clathrin assembly protein OS=Sus scrofa OX=9823 GN=PICALM PE=1 SV=2	1.139	1.017	0.989	0.903	0.923	0.913	0.965	0.845	0.835	1.081	1.048	1.106	1.027	0.964	0.967	0.974	0.994	0.95	1.021	1.023	1.102	0.909	1.056	0.883	0.962	0.971	0.845	9	9	9	0.972298	0.530273	-0.0405292	0.275501	1.03865	0.283499	0.0547036	0.547448
2879	A5A780	VPS33A	Vacuolar protein sorting-associated protein 33A OS=Sus scrofa OX=9823 GN=VPS33A PE=1 SV=1	0.969	0.845	1.011	1.082	0.676	0.609	1.132	1.122	1.022	1.056	0.885	0.931	0.823	1.044	1.044	1.064	1.055	1.178	0.936	0.933	0.795	0.951	0.898	1.266	0.929	0.951	0.855	9	9	9	0.994597	0.948038	-0.00781582	0.023174	1.06648	0.283628	0.0928552	0.547251
3011	F1RQT6	VPS51	Vacuolar protein sorting-associated protein 51 homolog OS=Sus scrofa OX=9823 GN=VPS51 PE=1 SV=3	1.089	1.084	1.083	0.982	0.96	1.142	1.138	1.199	0.99	0.953	0.935	1.264	0.963	0.894	0.893	1.039	0.907	0.988	1.014	0.997	1.138	0.847	1.181	1.139	0.9	0.951	1.284	9	9	9	1.02285	0.670383	0.0326013	0.173677	0.934928	0.283988	-0.0970736	0.546701
711	A0A4X1U6S6	MRPL12	Mitochondrial ribosomal protein L12 OS=Sus scrofa OX=9823 GN=MRPL12 PE=1 SV=1	0.905	1.148	1.063	1.39	1.825	1.134	1.019	0.945	0.973	0.954	0.894	0.759	1.108	0.819	1.034	1.052	0.9	1.027	0.595	0.739	0.759	0.868	1.651	2.638	1.032	1.34	1.132	9	9	9	0.967268	0.869173	-0.0480124	0.0608936	0.794774	0.2841	-0.331383	0.546528
343	D0G6X4	FDPS	Farnesyl pyrophosphate synthase OS=Sus scrofa OX=9823 GN=FDPS PE=1 SV=1	1.01	0.934	0.998	0.962	1.015	0.831	1.024	1.306	1.204	0.984	0.987	1.032	1.035	0.996	0.778	0.908	0.974	0.795	0.927	0.841	1.027	0.816	0.868	0.897	0.911	0.696	1.034	9	9	9	1.15804	0.0304638	0.211684	1.51622	1.05887	0.2846	0.0825321	0.545766
3015	A0A287BPW3	LOC110258650	Protegrin 3 OS=Sus scrofa OX=9823 GN=LOC110258650 PE=3 SV=1	1.041	0.644	0.568	0.797	0.861	0.845	0.872	0.711	0.862	0.763	0.776	0.966	0.647	1.089	1.469	2.497	1.204	1.065	0.558	1.006	0.592	1.048	0.734	0.914	1.269	0.984	1.289	9	9	9	0.857875	0.208231	-0.221161	0.681456	1.24803	0.285079	0.319658	0.545035
1047	A0A5G2R5Z1	TOP2B	DNA topoisomerase 2 OS=Sus scrofa OX=9823 GN=TOP2B PE=1 SV=2	1.02	1.103	1.107	1.129	1.076	1.149	1.017	0.905	0.974	1.037	0.923	1.012	0.962	1.016	0.975	0.802	0.973	0.858	0.95	1.064	0.975	0.914	1.16	1.048	0.824	0.869	1.402	9	9	9	1.02976	0.645707	0.0423126	0.189965	0.929611	0.285152	-0.105301	0.544924
196	P62901	RPL31	Large ribosomal subunit protein eL31 OS=Sus scrofa OX=9823 GN=RPL31 PE=1 SV=1	1.096	1.026	1.035	0.884	0.96	0.892	1.035	0.779	0.733	1.113	0.947	1.029	1.056	0.894	0.935	0.943	0.98	0.87	1.049	1	1.162	0.854	1.015	1.045	0.899	0.957	1.336	9	9	9	0.905871	0.144836	-0.142622	0.839124	0.940968	0.285213	-0.0877822	0.544831
2300	A0A2C9F3G7	ALOX15	Polyunsaturated fatty acid lipoxygenase ALOX15 OS=Sus scrofa OX=9823 GN=ALOX15 PE=3 SV=3	0.939	0.729	0.949	1.034	0.983	0.979	1.173	1.199	0.939	1.358	1.097	1.383	0.662	1.14	1.238	0.91	1.032	1.014	0.818	0.662	1.13	1.115	0.982	0.97	0.88	1.337	0.949	9	9	9	1.00916	0.911978	0.0131546	0.0400155	1.11207	0.285295	0.153242	0.544706
2507	A0A286ZT13	ALB	Albumin OS=Sus scrofa OX=9823 GN=ALB PE=1 SV=2	0.839	0.98	0.928	0.917	1.013	1.102	1.118	0.838	0.862	0.936	0.872	0.701	1.079	1.33	1.212	1.228	1.048	1.056	0.911	0.795	0.877	1.205	0.974	0.863	1.176	1.007	0.847	9	9	9	0.993299	0.915708	-0.00970051	0.038243	1.09324	0.285524	0.128611	0.544358
1992	F6QA08	PDIA3	Protein disulfide-isomerase OS=Sus scrofa OX=9823 GN=PDIA3 PE=1 SV=1	1.068	1.009	1.019	0.928	1.035	0.941	1.021	1.017	1.024	1.061	0.957	0.952	1.045	1.096	0.976	1.02	0.942	0.97	0.993	0.92	1.089	0.957	0.938	0.906	1.068	0.999	0.812	9	9	9	1.04377	0.210709	0.0618021	0.676317	1.03882	0.286099	0.0549401	0.543484
379	F1RTV1	PPAT	Amidophosphoribosyltransferase OS=Sus scrofa OX=9823 GN=PPAT PE=3 SV=3	1.071	0.976	1.095	1.281	1.079	0.957	1.036	1.094	1.13	1.056	0.838	1.06	1.095	0.8	0.94	1.178	1.102	1.023	1.131	1.118	1.064	0.851	0.998	1.475	0.969	0.921	1.367	9	9	9	0.982313	0.800691	-0.025746	0.0965353	0.918941	0.286341	-0.121956	0.543117
217	A0A8W4FPS6	PRPF19	Pre-mRNA-processing factor 19 OS=Sus scrofa OX=9823 GN=PRPF19 PE=1 SV=1	1.131	1.207	1.16	1.033	1.146	1.189	0.99	1.188	0.984	0.996	0.983	0.977	1.048	1.123	1.047	0.698	0.989	1	0.997	0.92	1.018	0.902	1.029	0.802	0.808	0.918	0.987	9	9	9	1.19652	0.00037202	0.25884	3.42943	1.05727	0.286353	0.0803471	0.543098
2821	F1RX00	MAOA	Amine oxidase OS=Sus scrofa OX=9823 GN=MAOA PE=1 SV=3	0.947	0.95	0.946	0.886	1.011	1.046	1.053	0.977	1.057	1.052	0.936	0.91	1.007	1.052	1.041	1.065	1.002	0.94	0.987	1.018	1.079	0.985	0.988	1.036	0.981	1.128	1.06	9	9	9	0.958	0.118712	-0.0619018	0.925504	0.972252	0.286688	-0.0405975	0.54259
861	F1RJE4	ATAD3A	ATPase family AAA domain containing 3A OS=Sus scrofa OX=9823 GN=ATAD3A PE=1 SV=3	0.921	1.067	1.072	0.948	0.984	0.852	1.021	1.099	1.18	0.983	1.017	1.03	0.997	0.855	0.904	0.95	1	0.983	0.917	0.924	1.194	0.792	1.172	1.143	0.993	0.92	1.213	9	9	9	0.986621	0.824815	-0.0194326	0.0836436	0.940764	0.288073	-0.0880954	0.540497
2896	F1S1K0	RAD21	Double-strand-break repair protein rad21 homolog OS=Sus scrofa OX=9823 GN=RAD21 PE=1 SV=1	1.019	1.049	0.959	1.174	1.374	1.039	0.988	0.796	0.901	1.087	1.097	0.999	1.003	0.836	0.979	0.831	0.978	0.899	1.034	1.077	1.024	0.811	1.105	1.137	0.822	1.007	1.268	9	9	9	1.00151	0.983305	0.00217367	0.00731159	0.937964	0.288223	-0.0923948	0.540271
765	I3L7B6	CDK5	Cell division protein kinase 5 OS=Sus scrofa OX=9823 GN=CDK5 PE=1 SV=2	0.978	1.2	1.085	0.824	0.773	0.793	1.009	1.058	1.197	1.059	0.797	0.851	0.822	0.781	0.879	1.065	0.917	0.931	0.952	1.076	1.012	0.687	0.922	1.051	1.003	0.984	0.925	9	9	9	1.03542	0.618214	0.0502101	0.208861	0.94078	0.288236	-0.0880702	0.540252
1136	A0A480HZP7	FLII	FLII actin remodeling protein OS=Sus scrofa OX=9823 GN=FLII PE=4 SV=1	1.035	1.004	1.06	1.007	0.974	1.011	1.033	0.985	0.963	1.079	1.063	1.005	0.957	0.952	1.043	1.018	1.068	0.937	1.014	0.99	0.995	0.972	1.052	0.943	0.947	1.062	0.898	9	9	9	1.02243	0.299325	0.0319987	0.523857	1.02806	0.289023	0.0399282	0.539067
693	A0A480LAY6	CTSA	Carboxypeptidase OS=Sus scrofa OX=9823 GN=CTSA PE=1 SV=1	0.893	1.203	1.244	1.031	1.141	0.895	0.948	0.991	0.978	0.957	1.039	0.839	1.043	0.848	0.987	0.881	1.019	0.924	0.93	1.052	0.954	0.974	1.273	1.048	0.874	0.799	1.2	9	9	9	1.02417	0.71792	0.0344484	0.143924	0.93772	0.289742	-0.0927714	0.537988
2327	Q06AT8	RHOB	RHOB OS=Sus scrofa OX=9823 GN=RHOB PE=1 SV=1	0.892	1.123	0.89	0.967	0.952	0.787	1.043	0.87	0.81	1.215	1.016	7.889	1.188	1.056	1.009	1.009	1.138	1.007	0.927	0.805	0.917	0.833	0.899	1.088	0.848	1.007	1.463	9	9	9	0.948447	0.522991	-0.0763616	0.281506	1.88085	0.29014	0.911382	0.537392
1216	A0A286ZZ41	WDR37	WD repeat-containing protein 37 OS=Sus scrofa OX=9823 GN=WDR37 PE=1 SV=2	1.059	1.032	1.187	1.01	0.967	0.962	1.074	1.048	0.998	0.947	0.819	0.967	0.913	0.853	0.852	0.852	0.911	0.987	0.852	0.792	0.992	0.984	1.156	0.866	1.015	1.068	0.828	9	9	9	1.09166	0.0859429	0.126529	1.06579	0.947153	0.290467	-0.0783305	0.536903
2458	K7GRV6	MPO	Myeloperoxidase OS=Sus scrofa OX=9823 GN=MPO PE=1 SV=2	0.941	1.062	0.738	1.489	0.807	0.797	0.863	1.154	1.084	1.001	0.983	1.213	0.901	0.988	1.148	1.546	1.11	0.915	0.782	1.04	0.973	0.893	0.863	1.448	0.978	0.824	1.077	9	9	9	1.00642	0.951603	0.00923302	0.0215442	1.10442	0.290603	0.143283	0.5367
1902	A0A8W4F8U2	NECTIN1	Nectin cell adhesion molecule 1 OS=Sus scrofa OX=9823 GN=NECTIN1 PE=3 SV=1	1.005	0.988	1.059	1.067	1.166	1.299	1.085	1.09	1.178	0.932	0.841	0.832	1.048	1.055	1.088	0.978	0.988	1.084	0.914	0.995	0.948	1.039	1.438	1.171	1.037	0.925	1.008	9	9	9	1.04876	0.43264	0.0686844	0.363874	0.933615	0.291475	-0.0991007	0.535399
934	F1SA02	RASAL3	RAS protein activator like 3 OS=Sus scrofa OX=9823 GN=RASAL3 PE=4 SV=3	1.056	0.959	0.909	1.03	1.011	0.927	1.069	1.068	1.163	0.961	0.833	0.948	0.949	0.951	1.06	1.045	1.028	1.008	0.945	1.021	0.947	0.874	1.108	1.193	1.024	0.997	1.059	9	9	9	1.00262	0.949441	0.00377175	0.0225322	0.958006	0.292186	-0.0618932	0.534341
1655	A0A287A4F2	SFPQ	Splicing factor proline and glutamine rich OS=Sus scrofa OX=9823 GN=SFPQ PE=4 SV=1	1.093	1.026	1.057	1.032	1.047	1.007	1.134	1.101	1.025	1.058	1.009	1.025	1.03	0.945	0.996	0.933	0.938	1	1.037	0.96	1.064	1.05	1.167	0.929	0.978	1.025	0.996	9	9	9	1.03433	0.218903	0.0486902	0.659748	0.970454	0.292191	-0.0432682	0.534333
268	F1RJT3	DPYSL2	Dihydropyrimidinase-related protein 2 OS=Sus scrofa OX=9823 GN=DPYSL2 PE=1 SV=5	0.938	0.974	0.974	0.902	0.852	1.062	1.043	1.021	1.138	0.992	0.999	0.921	0.876	1.071	1.012	1.095	0.995	0.958	1.021	1.039	0.906	0.907	0.76	0.922	1.024	0.956	1.017	9	9	9	1.04116	0.360907	0.0581917	0.442604	1.04291	0.292545	0.0606201	0.533807
361	A0A287B9B3	SERPINF2	Alpha-2-antiplasmin isoform X2 OS=Sus scrofa OX=9823 GN=SERPINF2 PE=1 SV=1	0.971	1.186	0.953	1.001	0.962	0.916	0.954	0.981	0.98	1.086	0.969	0.963	0.969	0.97	0.966	1.051	0.99	1.058	0.937	0.973	1.018	1.372	1.01	1.141	0.998	1.008	1.03	9	9	9	0.938547	0.224864	-0.0914984	0.648079	0.950986	0.293754	-0.0725047	0.532016
52	A0A286ZXU2	FLNA	Filamin A OS=Sus scrofa OX=9823 GN=FLNA PE=1 SV=3	0.835	1.074	1.218	1.033	1.098	1.015	1.019	1.052	0.954	0.904	0.89	0.914	1.078	1.079	1.015	1.03	0.979	1.011	0.878	1.139	0.922	0.899	0.798	0.833	1.072	0.978	0.952	9	9	9	1.09763	0.0867711	0.134388	1.06163	1.05064	0.294304	0.071273	0.531204
3008	A0A5G2QKU3	FAM50A	Family with sequence similarity 50 member A OS=Sus scrofa OX=9823 GN=FAM50A PE=1 SV=2	0.917	0.966	0.936	1.189	1.049	0.865	0.731	1.25	1.76	0.999	0.871	1.047	0.816	0.728	0.915	0.464	0.749	1.072	0.901	0.928	0.887	1.281	1.134	1.025	0.494	0.565	2.544	9	9	9	0.990163	0.962867	-0.0142622	0.0164338	0.785019	0.294425	-0.349201	0.531026
2988	A0A287AD21	SUMO3	Small ubiquitin-related modifier OS=Sus scrofa OX=9823 GN=SUMO3 PE=3 SV=2	1.055	1.04	1.1	0.959	1.084	1.075	1.253	0.956	0.883	1.024	0.98	0.965	1.001	1.076	1.22	0.951	1.074	1.022	0.988	0.93	0.926	1.2	0.939	0.64	1.166	1.059	0.847	9	9	9	1.08166	0.255949	0.113242	0.591846	1.07108	0.294684	0.09906	0.530644
13	A0A287AQR8	HSPB6	Heat shock protein family B (small) member 6 OS=Sus scrofa OX=9823 GN=HSPB6 PE=1 SV=1	0.704	1.182	1.456	1.012	0.98	1.022	1.066	1.173	1.128	0.84	1.191	0.921	1.001	0.946	0.945	0.89	0.915	1.036	1.074	1.084	1.003	0.692	0.717	0.838	0.967	0.858	0.881	9	9	9	1.1983	0.0462886	0.260988	1.33453	1.07037	0.29522	0.0981125	0.529855
1732	I3LLD6	THUMPD1	THUMP domain containing 1 OS=Sus scrofa OX=9823 GN=THUMPD1 PE=1 SV=1	1.028	1.094	0.978	1.122	1.044	1.086	1.017	0.97	1.044	1.007	0.943	0.954	0.991	1.086	1.026	0.938	0.952	0.989	0.951	1.078	1.07	0.954	0.988	0.996	0.915	1.06	1.206	9	9	9	1.0179	0.602336	0.0255955	0.220161	0.963984	0.295451	-0.0529196	0.529515
909	A0A287BKE2	NDRG1	Protein NDRG1 OS=Sus scrofa OX=9823 GN=NDRG1 PE=1 SV=1	1.055	0.989	0.91	1.139	1	1.055	1.047	0.974	1.007	1.024	0.975	0.951	1.056	1.103	1.045	0.989	1.022	0.9	0.983	1.112	1.049	0.976	1.035	1.215	0.875	0.99	1.318	9	9	9	0.960536	0.418318	-0.0580885	0.378493	0.948917	0.295514	-0.0756468	0.529422
646	A0A287AQP0	AKT2	non-specific serine/threonine protein kinase OS=Sus scrofa OX=9823 GN=AKT2 PE=3 SV=1	0.943	1.043	0.864	1.092	1.095	0.95	1.25	1.182	1.14	0.874	0.86	0.81	1.169	1.044	1.003	0.933	1.068	0.852	0.902	1.292	0.743	1.056	0.868	1.363	0.881	0.861	2.42	9	9	9	0.920374	0.617677	-0.119709	0.209239	0.829289	0.296028	-0.270052	0.528667
820	A0A287BFV8	GRIPAP1	GRIP1 associated protein 1 OS=Sus scrofa OX=9823 GN=GRIPAP1 PE=1 SV=2	1.033	1.142	1.166	1.127	1.079	0.603	1.104	1.19	0.881	0.969	0.94	0.945	0.914	0.494	0.614	1.13	0.972	1.083	1.127	0.949	1.094	0.84	0.777	0.87	0.927	1.103	1.206	9	9	9	1.04858	0.554859	0.0684335	0.255818	0.906443	0.29603	-0.141711	0.528665
782	A0A287B8Z3	ARFIP1	ADP ribosylation factor interacting protein 1 OS=Sus scrofa OX=9823 GN=ARFIP1 PE=1 SV=1	1.051	1.085	1.009	1.077	1.026	1.07	1.098	1.061	1.195	1.125	1.089	0.901	0.998	1.044	1.126	1.094	1.02	1.025	1.067	1.055	1.118	1.001	1.022	1.27	0.935	1.078	1.417	9	9	9	0.970792	0.551825	-0.042766	0.258199	0.945699	0.296072	-0.0805469	0.528603
2564	K7GSE5	NDUFB9	NADH dehydrogenase [ubiquinone] 1 beta subcomplex subunit 9 OS=Sus scrofa OX=9823 GN=NDUFB9 PE=1 SV=2	1.11	1.106	0.969	0.937	0.926	0.976	1.022	0.758	0.655	0.973	1.191	1.083	1.31	1.137	1.175	0.935	1.118	1.045	1.028	0.968	1.15	0.976	0.901	0.943	0.972	0.945	1.431	9	9	9	0.908203	0.218843	-0.138914	0.659866	1.07011	0.296182	0.0977584	0.528442
2799	P79381	EPHX1	Epoxide hydrolase 1 OS=Sus scrofa OX=9823 GN=EPHX1 PE=2 SV=1	1.051	0.912	0.878	1.008	1.004	1.05	0.946	0.854	0.964	1.056	0.943	0.939	0.972	1.017	0.958	0.902	1.002	0.85	1.086	1.127	1.076	0.998	0.907	1.178	0.912	0.886	0.89	9	9	9	0.956623	0.344516	-0.0639783	0.462791	0.953532	0.296524	-0.0686467	0.527941
1817	A0A287B150	LLGL2	LLGL scribble cell polarity complex component 2 OS=Sus scrofa OX=9823 GN=LLGL2 PE=3 SV=2	0.982	1.064	0.954	0.922	1.13	0.811	0.983	0.964	1.073	0.949	0.972	0.955	1.07	0.914	0.879	1.113	1.036	0.979	0.972	0.964	1.055	0.773	1.982	1.13	1.003	0.951	1.221	9	9	9	0.883793	0.307168	-0.17822	0.512624	0.882201	0.296577	-0.180821	0.527863
2115	F1RN05	SPTLC1	Serine palmitoyltransferase 1 OS=Sus scrofa OX=9823 GN=SPTLC1 PE=1 SV=3	1.061	1.047	0.94	1.092	1.006	0.993	0.935	1.079	0.944	1.117	0.952	1.037	0.994	0.919	0.879	0.95	0.913	0.89	1.096	1.033	1.199	0.952	1.095	1.119	0.804	0.793	1.086	9	9	9	0.991283	0.866203	-0.0126318	0.0623805	0.942683	0.29746	-0.0851557	0.526571
195	I3LUM8	FARSB	phenylalanine--tRNA ligase OS=Sus scrofa OX=9823 GN=FARSB PE=1 SV=2	1.04	1.123	1.05	1.039	1.029	0.927	0.989	1.005	0.983	1.09	1.021	1.029	1.212	1.015	1.001	0.891	0.975	0.98	0.998	0.944	1.076	1.119	1.038	0.964	0.889	0.911	0.881	9	9	9	1.04138	0.244798	0.0585011	0.611193	1.04467	0.297542	0.0630489	0.526451
2078	A0A5G2QKM6	PITPNA	Phosphatidylinositol transfer protein alpha isoform OS=Sus scrofa OX=9823 GN=PITPNA PE=1 SV=2	0.948	0.962	0.876	1.222	0.969	0.915	1.061	1.087	1.12	0.936	0.869	0.936	1.009	0.864	1.028	0.97	0.996	0.908	0.982	0.917	0.804	0.992	0.948	1.191	0.904	1	1.367	9	9	9	1.00604	0.929085	0.00868858	0.0319447	0.93531	0.297936	-0.0964831	0.525877
143	I3LUY1	LPP	LIM domain containing preferred translocation partner in lipoma OS=Sus scrofa OX=9823 GN=LPP PE=1 SV=1	0.864	1.133	1.15	1.02	1.017	0.855	0.988	1.313	0.983	0.895	1.001	1.087	1.06	0.994	1.095	0.971	0.997	1.037	1.153	1.078	0.98	0.919	0.81	0.945	1.048	0.807	0.969	9	9	9	1.0705	0.285814	0.0982872	0.543916	1.04914	0.298269	0.0692135	0.525391
2132	F1RVX2	JPT1	Jupiter microtubule associated homolog 1 OS=Sus scrofa OX=9823 GN=JPT1 PE=1 SV=2	1.077	1.023	1.087	1.189	1.172	1.179	1.095	1.154	1.199	1.035	0.935	0.92	0.95	1.054	1.1	1.025	1.077	0.996	0.964	1.018	1.021	0.889	1.166	1.098	1.026	1.036	1.376	9	9	9	1.06056	0.230247	0.0848244	0.637807	0.947676	0.298589	-0.0775348	0.524927
2070	F1RFW8	ELMO3	Engulfment and cell motility 3 OS=Sus scrofa OX=9823 GN=ELMO3 PE=4 SV=3	0.922	0.905	0.97	0.932	0.911	1.144	0.99	1.044	1.081	0.926	0.927	0.987	0.935	1.577	1.079	1.026	0.984	0.98	1.118	1.139	0.911	0.875	0.877	0.984	1.02	0.824	0.915	9	9	9	1.02724	0.580252	0.0387765	0.236383	1.0875	0.298894	0.121013	0.524482
2688	A0A4X1UTE2	HNRNPK	Heterogeneous nuclear ribonucleoprotein K OS=Sus scrofa OX=9823 GN=HNRNPK PE=1 SV=1	1.072	0.984	1.047	1.007	0.95	0.961	1.088	0.87	0.721	1.088	1.077	0.98	0.95	0.98	0.896	1.014	1.087	1.045	1.024	0.99	1.038	0.952	0.91	0.878	1.022	1.072	0.929	9	9	9	0.986954	0.775492	-0.0189452	0.110423	1.03426	0.299058	0.0485986	0.524244
1662	F1SP18	TARS1	threonine--tRNA ligase OS=Sus scrofa OX=9823 GN=TARS1 PE=1 SV=5	1.148	0.979	0.987	1.061	1.035	1.034	1.031	1.103	1.207	1.073	0.947	0.951	0.981	1.01	1.044	1.074	1.007	1.045	1.052	1.008	0.992	0.891	1.078	0.915	0.955	1.043	0.936	9	9	9	1.08061	0.0293797	0.111844	1.53195	1.02954	0.299087	0.0419968	0.524202
374	A0A287BRK7	UBTF	Upstream binding transcription factor OS=Sus scrofa OX=9823 GN=UBTF PE=1 SV=2	1.004	1.006	0.883	1.017	1.03	1.034	1.068	0.834	0.906	1.053	1.044	0.962	1.068	1.067	1.142	0.924	0.929	0.796	1.073	1.095	0.966	1.038	0.909	1.153	0.97	0.962	1.419	9	9	9	0.916223	0.148288	-0.126229	0.828893	0.937402	0.299966	-0.0932599	0.522928
1453	A0A4X1T4A7	DERL1	Derlin OS=Sus scrofa OX=9823 GN=DERL1 PE=1 SV=1	0.969	1.067	1.022	1.442	1.363	0.972	1.209	1.431	1.417	0.931	0.866	0.928	1.029	0.81	0.916	1.272	1.067	1.14	0.947	0.801	1.015	1.032	1.489	1.078	1.036	0.957	1.533	9	9	9	1.10154	0.314155	0.139518	0.502856	0.906048	0.300026	-0.142341	0.522841
2336	A0A286ZXA3	POR	NADPH--cytochrome P450 reductase OS=Sus scrofa OX=9823 GN=POR PE=1 SV=1	1.175	1.078	1.254	1.061	1.078	1.055	1.05	1.177	1.154	1.172	1.069	1.16	0.98	0.877	0.948	0.98	1.009	1.021	1.197	0.948	1.177	0.947	1.226	1.091	1.025	1.004	1.059	9	9	9	1.04217	0.304213	0.0595974	0.516823	0.952657	0.300211	-0.0699718	0.522573
1411	A0A5G2Q8U4	ATG4B	Cysteine protease OS=Sus scrofa OX=9823 GN=ATG4B PE=3 SV=2	0.978	0.762	0.868	0.915	1.222	0.738	0.991	1.063	1.011	0.869	0.537	0.696	0.954	1.045	1.091	1.06	0.975	0.838	0.866	0.872	0.84	1.067	0.913	0.912	0.965	1.144	1.22	9	9	9	0.971474	0.68446	-0.0417527	0.164652	0.916581	0.300228	-0.125665	0.522548
2527	A0A286ZVG7	COL6A3	Collagen type VI alpha 3 chain OS=Sus scrofa OX=9823 GN=COL6A3 PE=1 SV=2	0.961	0.878	0.935	1.411	0.901	0.943	0.889	0.926	0.933	1.006	1.19	0.896	0.917	0.997	1.312	1.13	1.016	1.012	1.058	1.034	0.956	1.143	0.997	0.984	1.013	0.976	0.784	9	9	9	0.981219	0.774706	-0.0273536	0.110863	1.05936	0.300619	0.0831967	0.521984
1046	F1RQ42	BTNL2	Butyrophilin like 2 OS=Sus scrofa OX=9823 GN=BTNL2 PE=1 SV=4	1.231	0.762	0.826	0.712	0.776	0.974	1.182	0.983	0.971	0.964	1.056	0.97	1.002	0.958	0.72	1.122	1.002	0.996	1.051	0.846	1.262	0.876	0.914	0.965	1.079	1.123	1.311	9	9	9	0.892861	0.191668	-0.163493	0.71745	0.932428	0.300814	-0.100936	0.521702
1613	A0A4X1UZH9	PTPN6	Tyrosine-protein phosphatase non-receptor type OS=Sus scrofa OX=9823 GN=PTPN6 PE=1 SV=1	1.026	0.996	1.024	1.091	1.047	0.921	1.082	1.067	1.089	1.013	0.916	0.977	1.046	0.792	0.974	0.938	1.073	0.997	1	0.977	0.952	0.917	1.142	1.1	0.945	0.99	1.063	9	9	9	1.02829	0.375411	0.0402406	0.425493	0.960379	0.301043	-0.0583248	0.521371
1121	A0A8D1Z1H8	TGM2	Protein-glutamine gamma-glutamyltransferase 2 OS=Sus scrofa OX=9823 GN=TGM2 PE=1 SV=1	1.146	0.956	0.943	1.914	1.089	0.885	1.132	0.955	0.971	0.973	0.778	1.403	0.926	0.813	1.434	0.908	0.963	1.025	0.965	0.968	0.829	0.852	1.109	0.869	0.988	0.934	0.887	9	9	9	1.18926	0.138501	0.250068	0.858548	1.09785	0.30123	0.134675	0.521102
953	A0A8D1Q9E8	RABGGTA	Geranylgeranyl transferase type-2 subunit alpha OS=Sus scrofa OX=9823 GN=RABGGTA PE=1 SV=1	1.001	1.002	0.95	0.903	0.889	0.826	0.91	0.892	0.781	0.972	0.957	0.952	1.036	0.865	0.95	1.005	1.064	1.048	0.929	0.985	0.916	1.087	1.039	1.057	0.976	1.012	1.177	9	9	9	0.888429	0.00670744	-0.170672	2.17344	0.964153	0.301603	-0.0526654	0.520564
1839	A0A287AU89	PCDH1	Protocadherin 1 OS=Sus scrofa OX=9823 GN=PCDH1 PE=1 SV=2	0.999	1.469	1.438	1.126	1.321	1.001	1.133	1.124	1.041	0.931	0.97	1.192	1.234	1.049	1.089	1.037	0.968	0.984	1.134	0.83	1.183	1.003	1.179	1.161	1.09	1.107	1.314	9	9	9	1.06509	0.351701	0.0909801	0.453827	0.945305	0.301635	-0.0811475	0.520519
1819	F1RGP4	PBXIP1	PBX homeobox interacting protein 1 OS=Sus scrofa OX=9823 GN=PBXIP1 PE=1 SV=3	0.867	0.848	0.987	0.893	0.914	0.938	1.112	1.023	1.005	0.982	1.017	0.928	0.959	1.141	1.14	1.034	1.121	1.043	0.879	0.997	0.873	0.914	0.817	1.102	0.957	0.958	1.317	9	9	9	0.974246	0.669679	-0.0376427	0.174134	1.06251	0.302014	0.0874821	0.519974
2916	A0A286ZYN1	H6PD	Hexose-6-phosphate dehydrogenase/glucose 1-dehydrogenase OS=Sus scrofa OX=9823 GN=H6PD PE=4 SV=2	0.979	1.015	1.042	1.111	1.075	0.792	0.978	0.921	1.01	1.133	0.863	0.977	1.105	0.856	0.96	0.946	0.978	0.911	0.95	1.09	0.981	0.911	1.085	1.052	0.984	0.892	1.261	9	9	9	0.969259	0.531741	-0.0450456	0.2743	0.948186	0.30227	-0.0767581	0.519605
34	A0A287BPI5	PALLD	Palladin isoform X4 OS=Sus scrofa OX=9823 GN=PALLD PE=1 SV=1	0.815	0.94	1.051	0.971	0.988	1.031	0.975	0.996	0.971	0.88	0.945	0.892	0.96	1.137	1.037	0.981	1.058	0.993	0.929	1.076	0.974	0.839	0.757	0.881	1.084	0.868	1.03	9	9	9	1.03555	0.458547	0.050402	0.338616	1.05274	0.302371	0.0741459	0.519459
723	A0A5K1U8N6	ARFGAP2	ADP-ribosylation factor GTPase-activating protein 2 OS=Sus scrofa OX=9823 GN=ARFGAP2 PE=1 SV=1	1.192	1.109	1.02	1.197	0.912	0.927	1.025	0.995	1.172	1.103	1.149	1.155	0.947	0.935	1.111	1.052	0.97	0.906	1.141	0.975	1.094	0.879	0.898	0.962	0.937	1.035	0.989	9	9	9	1.07172	0.150222	0.0999242	0.823265	1.04691	0.302894	0.0661424	0.518709
18	A0A286ZPA0	LOC100520329	Amine oxidase OS=Sus scrofa OX=9823 GN=LOC100520329 PE=1 SV=1	0.893	1.159	1.237	0.891	1.057	0.844	0.969	1.137	0.919	0.912	1.003	0.94	0.936	0.959	0.889	0.799	0.976	1.017	0.987	0.978	0.98	0.801	0.858	0.837	0.934	0.798	0.933	9	9	9	1.12337	0.0588413	0.167827	1.23032	1.04009	0.303652	0.0567136	0.517624
2093	A0A5G2QJK6	TBC1D5	TBC1 domain family member 5 OS=Sus scrofa OX=9823 GN=TBC1D5 PE=1 SV=2	0.625	0.872	0.885	1.319	1.013	1.051	1.097	1.213	1.073	1.204	0.961	0.675	1.31	1.078	0.947	1.026	1.073	0.991	1.029	1.068	1.173	1.071	1.209	1.306	1.114	1.006	0.958	9	9	9	0.920878	0.279044	-0.118918	0.554327	0.932656	0.303763	-0.100584	0.517466
2640	A0A8X9AEI1	GMPPB	GDP-mannose pyrophosphorylase B OS=Sus scrofa OX=9823 GN=GMPPB PE=1 SV=1	0.991	0.923	0.949	0.932	0.876	0.999	0.974	0.694	0.667	0.916	0.901	0.943	1.145	1.083	1.138	1.009	1.008	0.901	0.965	0.782	0.99	1.04	0.847	0.989	1.075	0.927	1	9	9	9	0.929193	0.209678	-0.105949	0.678447	1.0498	0.304393	0.0701102	0.516566
874	F1RRR5	WASHC5	WASH complex subunit 5 OS=Sus scrofa OX=9823 GN=WASHC5 PE=1 SV=3	0.877	0.914	0.936	1.114	0.857	0.773	0.931	1.124	1.167	0.97	0.976	0.866	1.181	0.97	1.034	0.865	0.979	0.924	0.857	1.032	0.906	0.744	0.764	1.177	0.896	1.049	0.777	9	9	9	1.05986	0.428223	0.0838784	0.36833	1.06864	0.304598	0.0957783	0.516274
1665	A0A287A080	ANXA13	Annexin OS=Sus scrofa OX=9823 GN=ANXA13 PE=1 SV=2	1.034	0.981	1.003	0.975	0.905	0.946	0.96	0.901	0.926	0.955	0.884	0.971	1.096	1.041	0.98	0.917	0.934	0.941	1.091	0.983	1.076	0.866	1.094	1.19	0.92	0.962	0.932	9	9	9	0.947005	0.186335	-0.0785566	0.729706	0.95666	0.304964	-0.0639217	0.515752
994	A0A5G2R425	TMOD3	Tropomodulin 3 OS=Sus scrofa OX=9823 GN=TMOD3 PE=1 SV=1	1.121	1.018	0.996	1.018	1.017	1.115	1.093	1.14	1.224	1.115	0.976	1.01	1.054	1.088	0.969	1.046	1.024	1.136	0.961	0.995	0.986	1.05	1.165	0.876	1.057	1.113	0.814	9	9	9	1.0804	0.0924335	0.11157	1.03417	1.04447	0.305176	0.0627732	0.515449
740	A0A8D0RU74	MTCH2	Mitochondrial carrier 2 OS=Sus scrofa OX=9823 GN=MTCH2 PE=1 SV=1	1.1	0.981	0.965	1.09	1.039	1.138	0.907	0.934	0.843	1.125	0.841	0.851	1.021	0.967	1.034	0.777	0.831	0.994	1.07	0.936	0.983	0.838	1.214	1.281	0.861	0.84	1.052	9	9	9	0.991405	0.892541	-0.0124536	0.0493719	0.930138	0.305402	-0.104484	0.515128
399	A0A5G2QT35	PTGIS	Prostacyclin synthase OS=Sus scrofa OX=9823 GN=PTGIS PE=1 SV=1	0.964	0.922	0.916	1.217	1.016	1.083	1.01	1.159	1.172	0.972	1.028	1.006	0.945	1.056	1.069	1.046	1.038	1.056	0.897	1.007	0.866	0.875	1.136	1.042	1.047	1.023	1.001	9	9	9	1.06353	0.210595	0.0888553	0.676552	1.0362	0.305672	0.0513083	0.514744
1705	F1RL75	PDGFRB	Platelet-derived growth factor receptor beta OS=Sus scrofa OX=9823 GN=PDGFRB PE=1 SV=4	1.101	0.883	0.939	1.223	1.119	0.829	0.972	1.064	0.912	1.024	1.09	0.943	1.053	0.852	1.005	0.972	0.921	0.929	1.061	1.06	0.927	0.91	0.841	1.13	1.047	0.99	1.381	9	9	9	0.967369	0.62384	-0.0478615	0.204927	0.940302	0.305879	-0.0888044	0.51445
559	I3LU54	DSG3	Desmoglein 3 OS=Sus scrofa OX=9823 GN=DSG3 PE=4 SV=2	1.262	1.241	1.016	0.984	1.053	0.913	1.01	0.702	0.638	1.205	0.952	1.216	1.091	0.902	0.975	0.898	1.024	0.779	1.091	1.181	1.158	0.938	1.235	1.012	0.943	0.944	1.127	9	9	9	0.915879	0.28048	-0.126771	0.552098	0.939038	0.30603	-0.0907441	0.514237
1117	O02772	FABP3	Fatty acid-binding protein, heart OS=Sus scrofa OX=9823 GN=FABP3 PE=2 SV=3	1.025	1.03	1.072	1.001	1.025	1.092	1.006	1.019	0.99	1.037	0.991	0.952	1.01	0.993	1.039	0.878	0.999	0.971	0.977	0.891	0.963	0.871	1.005	0.878	1.092	1.061	0.764	9	9	9	1.08916	0.0433208	0.12321	1.3633	1.04328	0.306227	0.0611318	0.513956
2430	A0A5G2QK35	HTRA1	HtrA serine peptidase 1 OS=Sus scrofa OX=9823 GN=HTRA1 PE=1 SV=2	0.937	0.782	1.003	1.218	1.078	0.977	1.035	1.278	1.236	0.941	0.719	0.83	0.997	1.041	0.903	1.214	1.001	0.914	1.189	0.99	0.797	1.294	1.468	0.908	1.013	0.903	0.843	9	9	9	1.01478	0.869484	0.0211661	0.0607384	0.910154	0.306452	-0.135817	0.513638
35	A0A287APN0	CSRP1	Cysteine and glycine-rich protein 1 OS=Sus scrofa OX=9823 GN=CSRP1 PE=1 SV=1	0.734	0.934	1.17	0.525	1.219	0.949	0.995	1.298	0.985	0.719	0.938	0.868	0.947	1.245	0.969	0.79	0.976	1.081	0.992	1.144	0.807	0.811	0.613	0.519	1.197	0.769	0.813	9	9	9	1.14925	0.264387	0.200692	0.57776	1.11324	0.306473	0.154767	0.513607
1208	K7GP28	HSD17B10	Hydroxysteroid 17-beta dehydrogenase 10 OS=Sus scrofa OX=9823 GN=HSD17B10 PE=1 SV=1	1.149	0.914	1.004	1.195	1.118	1.536	1.155	1.172	1.327	1.041	1.017	0.875	1.085	1.291	1.246	1.144	1.166	1.074	0.941	0.95	0.939	1.095	1.276	1.071	1.028	1.14	0.962	9	9	9	1.12423	0.0881842	0.168936	1.05461	1.05712	0.30656	0.080133	0.513484
1002	I3L7T4	LONP1	Lon protease homolog, mitochondrial OS=Sus scrofa OX=9823 GN=LONP1 PE=1 SV=2	1.073	1.161	1.161	0.986	1.01	0.971	1.095	0.964	1.05	0.991	0.902	0.876	1.03	1.084	1.056	0.987	0.963	0.919	0.913	0.996	0.926	0.981	1.124	1.165	1	1.101	0.964	9	9	9	1.03282	0.406788	0.046595	0.390632	0.960523	0.307495	-0.0581073	0.512162
1910	I3LGG1	RRAGB	Ras-related GTP-binding protein OS=Sus scrofa OX=9823 GN=RRAGB PE=3 SV=3	1.538	0.699	1.166	1.253	1.314	0.86	0.857	1.039	0.881	0.994	1.022	1.043	1.134	1.024	0.932	0.754	0.8	0.735	0.836	0.97	1.21	1.199	0.854	1.364	0.721	1.142	0.952	9	9	9	1.03882	0.732338	0.0549446	0.135289	0.912413	0.307523	-0.13224	0.512123
638	Q6UAQ8	ETFB	Electron transfer flavoprotein subunit beta OS=Sus scrofa OX=9823 GN=ETFB PE=1 SV=3	1.014	0.978	1.014	0.982	0.935	1.002	0.97	1.049	1.186	1.068	0.976	0.937	0.939	1.045	1.003	1.02	0.94	0.945	0.972	1.023	1.082	0.903	0.827	0.929	0.978	1.01	0.831	9	9	9	1.06721	0.108005	0.093847	0.966558	1.03717	0.307822	0.0526541	0.5117
344	A0A287AHU4	CRNKL1	Crooked neck pre-mRNA splicing factor 1 OS=Sus scrofa OX=9823 GN=CRNKL1 PE=1 SV=2	1.021	1.018	1.086	1.018	0.905	1.086	1.011	0.725	0.673	0.955	0.973	0.937	0.829	0.882	1	1.008	0.973	1.027	1.009	0.993	0.976	0.907	1.208	0.873	0.837	1.225	1.035	9	9	9	0.942624	0.406939	-0.0852459	0.39047	0.947148	0.307847	-0.0783386	0.511664
2811	A0A287AWH7	SEC24A	SEC24 homolog A, COPII coat complex component OS=Sus scrofa OX=9823 GN=SEC24A PE=1 SV=2	1.065	0.948	0.912	0.962	0.989	0.88	1.031	0.908	0.964	1.046	1.103	0.967	0.962	0.925	0.993	1.03	1.029	0.957	1.038	1.12	1.122	0.83	1.013	1.153	1.013	0.936	1.196	9	9	9	0.919117	0.0738988	-0.12168	1.13136	0.956586	0.308014	-0.0640329	0.51143
1034	A0A287ATJ5	BRI3BP	BRI3 binding protein OS=Sus scrofa OX=9823 GN=BRI3BP PE=1 SV=1	1.148	1.065	0.996	0.817	0.85	0.792	1.035	0.891	0.925	1.014	0.968	0.982	1.006	0.869	0.786	0.949	0.994	0.881	1.015	0.928	1.124	0.805	0.986	1	0.938	0.945	1.094	9	9	9	0.964233	0.504777	-0.052546	0.296901	0.95631	0.308304	-0.0644495	0.51102
1779	A0A287B356	EIF5A	Eukaryotic translation initiation factor 5A-1 OS=Sus scrofa OX=9823 GN=EIF5A PE=1 SV=2	1.119	0.946	1.013	0.873	0.967	1.048	1.062	0.927	0.98	1.026	0.882	1.051	0.909	1.01	1	0.938	0.965	1.005	0.877	0.955	0.886	0.902	0.954	0.854	1.012	1.167	0.785	9	9	9	1.0647	0.195822	0.0904531	0.708139	1.04695	0.30846	0.0661918	0.510802
1200	F1S455	TMEM231	Transmembrane protein 231 OS=Sus scrofa OX=9823 GN=TMEM231 PE=3 SV=3	1.008	1.475	1.542	0.881	1.005	0.457	1.007	1.249	1.094	0.773	1.223	1.174	0.667	0.442	0.443	0.826	0.916	1.059	1.507	0.811	1.17	0.741	0.889	0.788	0.807	0.751	1.34	9	9	9	1.10382	0.491763	0.1425	0.308244	0.854498	0.308617	-0.226851	0.51058
2784	A0A287BL93	HNRNPM	Heteroous nuclear ribonucleoprotein M OS=Sus scrofa OX=9823 GN=HNRNPM PE=1 SV=2	1.136	0.993	0.977	1.002	0.908	1.054	1.119	0.804	0.923	1.045	0.927	1.103	0.996	0.999	0.937	0.942	1.065	1.074	0.923	1.003	1.085	1.039	1.088	0.847	0.926	1.004	0.777	9	9	9	1.02577	0.624166	0.0367084	0.2047	1.04556	0.309182	0.0642747	0.509785
913	A0A4X1VZE2	PSMB2	Proteasome subunit beta OS=Sus scrofa OX=9823 GN=PSMB2 PE=1 SV=1	1.231	0.846	0.874	1.155	1.083	1.006	1.07	1.068	1.008	1.146	1.011	1.049	1.218	1.014	1.109	0.978	0.925	0.935	0.997	1.041	1.016	1.002	1.244	1.331	1.064	0.959	1.269	9	9	9	0.941348	0.311262	-0.0871993	0.506874	0.945783	0.309481	-0.0804196	0.509366
2509	A0A8W4FFC7	TMED2	Transmembrane p24 trafficking protein 2 OS=Sus scrofa OX=9823 GN=TMED2 PE=1 SV=1	0.676	1.111	1.093	0.974	1.378	0.65	0.858	1.408	1.136	0.756	1.308	1.303	1.051	0.522	0.77	0.755	0.914	1.197	1.284	0.762	0.925	0.916	1.322	1.6	0.82	0.664	1.838	9	9	9	0.916395	0.572322	-0.125958	0.242359	0.846511	0.309657	-0.2404	0.509119
2305	F1SHL3	SEC23A	Protein transport protein SEC23 OS=Sus scrofa OX=9823 GN=SEC23A PE=1 SV=1	0.983	0.944	1.015	1.18	0.866	0.774	1.025	1.06	1.097	1.092	1.083	1.022	0.891	0.879	0.867	0.991	0.999	0.981	1.086	0.89	1.012	0.933	0.973	1.108	1.099	1	1.062	9	9	9	0.9761	0.62005	-0.0348998	0.207573	0.96093	0.309774	-0.057497	0.508955
1143	F1SDW4	PARG	poly(ADP-ribose) glycohydrolase OS=Sus scrofa OX=9823 GN=PARG PE=3 SV=3	0.98	0.909	0.849	1.144	1.081	1.2	1.315	1.392	1.317	0.98	0.789	0.918	1.075	1.08	1.193	1.06	1.35	1.319	0.966	1.213	0.994	1.002	1.194	1.251	1.196	1.347	1.333	9	9	9	0.97056	0.674958	-0.0431104	0.170723	0.930259	0.310161	-0.104295	0.508413
814	I3LPU5	PRMT3	Protein arginine methyltransferase 3 OS=Sus scrofa OX=9823 GN=PRMT3 PE=4 SV=2	1.113	0.829	0.819	0.951	0.912	1.011	0.991	1.004	0.97	0.955	0.772	0.885	0.866	0.906	0.925	1.017	1.014	0.939	0.848	1.03	0.932	0.811	0.982	1.173	0.939	0.885	1.14	9	9	9	0.983982	0.767374	-0.0232966	0.114993	0.947254	0.310314	-0.0781768	0.508199
1673	A0A287AHC3	MYOF	Myoferlin OS=Sus scrofa OX=9823 GN=MYOF PE=1 SV=2	1.015	0.93	0.974	1.004	1.103	0.997	0.984	0.986	0.999	1.041	0.919	0.924	0.983	0.955	1.078	1.033	0.962	0.994	1.013	1.014	0.967	0.949	0.978	1.074	1.043	1.017	1.048	9	9	9	0.987806	0.555332	-0.0177	0.255447	0.976491	0.310341	-0.034321	0.508161
2865	A0A287A1V9	DHRS7B	Dehydrogenase/reductase SDR family member 7B OS=Sus scrofa OX=9823 GN=DHRS7B PE=3 SV=3	0.98	0.939	0.946	1.1	1.071	1.02	1.133	1.254	1.147	0.96	0.906	0.799	0.995	0.905	0.959	1.217	1.113	1.071	0.922	0.985	0.99	0.968	1.116	1.049	1.089	1.083	1.206	9	9	9	1.01935	0.663473	0.0276428	0.178177	0.948661	0.310829	-0.0760359	0.507479
683	A0A287BMV2	SRSF1	Serine/arginine-rich splicing factor 1 OS=Sus scrofa OX=9823 GN=SRSF1 PE=1 SV=1	0.971	0.974	1.031	1.076	1.031	0.89	0.995	1.031	1.045	1.031	0.836	0.893	1.019	0.94	0.998	0.959	0.988	0.922	1.026	0.999	0.962	0.853	1.004	1.255	1.041	0.904	0.952	9	9	9	1.00534	0.90077	0.00767733	0.0453861	0.954424	0.311009	-0.0672975	0.507227
204	A0A4X1UIL1	UBE2V1	Ubiquitin-conjugating enzyme E2 variant 1 OS=Sus scrofa OX=9823 GN=UBE2V1 PE=1 SV=1	0.933	0.885	0.901	0.95	1.084	1.108	1.035	1.081	1.037	0.943	0.83	0.8	1.025	1.075	1.076	1.086	0.92	0.978	0.83	0.902	0.85	0.947	1.027	0.756	1.107	0.99	0.842	9	9	9	1.09247	0.0886824	0.127598	1.05216	1.05842	0.311189	0.0819084	0.506976
498	F1SQH4	MSH2	DNA mismatch repair protein OS=Sus scrofa OX=9823 GN=MSH2 PE=1 SV=3	0.952	0.89	0.901	1.42	1.036	1.017	1.003	0.92	1.077	1.069	0.764	0.847	1.248	1.008	1.124	1.072	1.02	1.014	0.893	1.014	0.883	1.299	1.148	1.531	1.024	1.078	1.079	9	9	9	0.926324	0.362012	-0.110411	0.441277	0.921299	0.311393	-0.118259	0.506691
1329	Q0QF01	SDHA	Succinate dehydrogenase [ubiquinone] flavoprotein subunit, mitochondrial OS=Sus scrofa OX=9823 GN=SDHA PE=1 SV=2	1.065	0.899	0.898	0.952	0.907	0.883	1.033	0.95	0.803	1.021	1.098	0.957	1.001	0.906	0.896	0.984	0.945	0.99	0.98	0.996	1.062	0.981	0.968	1.126	1.002	0.938	1.006	9	9	9	0.926151	0.0372893	-0.110681	1.42842	0.971189	0.311543	-0.0421762	0.506482
282	A0A287AT83	EIF4B	Eukaryotic translation initiation factor 4B OS=Sus scrofa OX=9823 GN=EIF4B PE=4 SV=3	0.992	1.064	1.033	1.034	0.996	0.878	0.978	1.005	0.871	0.962	0.992	1.033	1.036	0.884	1.025	0.951	0.988	0.941	1.023	0.938	1.03	0.919	1.142	1.039	0.907	0.971	1.192	9	9	9	0.966161	0.399082	-0.0496646	0.398938	0.961904	0.31187	-0.0560356	0.506026
1617	A0A287ALC1	IGHM	Immunoglobulin heavy constant mu OS=Sus scrofa OX=9823 GN=IGHM PE=4 SV=3	0.862	1.121	1.016	1.013	0.923	1.161	1.021	0.942	0.994	0.786	0.818	0.805	1.039	1.003	0.932	1.017	1.049	0.932	0.95	0.808	0.967	1.296	0.981	0.935	1.015	0.981	0.969	9	9	9	1.01696	0.756287	0.0242665	0.121314	0.941474	0.312224	-0.0870071	0.505534
1437	A0A286ZLU2	HAAO	3-hydroxyanthranilate 3,4-dioxygenase OS=Sus scrofa OX=9823 GN=HAAO PE=3 SV=1	0.945	0.986	0.895	1.114	1.062	1.125	1.035	1.013	1.188	0.993	1.159	0.906	1.129	1.026	1.054	1.026	0.976	0.926	0.991	1.14	1.065	0.974	1.203	1.206	1.032	0.942	1.044	9	9	9	0.975617	0.56878	-0.0356126	0.245056	0.958112	0.31239	-0.0617339	0.505302
1632	A0A5S6GT88	CAPNS1	Calpain small subunit 1 OS=Sus scrofa OX=9823 GN=CAPNS1 PE=4 SV=2	1.06	1.012	1.115	0.741	0.954	1.279	0.914	0.841	0.847	0.922	1.053	0.912	0.823	1.161	1.115	1.082	1.041	0.961	0.903	0.985	0.969	1.053	0.955	0.619	0.93	1.015	1.093	9	9	9	1.02828	0.711127	0.0402328	0.148053	1.0643	0.313234	0.0899105	0.504131
763	A0A5G2RL17	ESYT2	Extended synaptotagmin 2 OS=Sus scrofa OX=9823 GN=ESYT2 PE=1 SV=2	1.041	0.913	0.886	1.033	0.915	0.904	0.932	0.973	0.946	0.925	1.054	0.942	1.126	1.138	1.202	1.031	1.036	0.94	0.979	1.041	1.024	0.884	0.943	1.174	0.915	1.021	1.009	9	9	9	0.950278	0.164091	-0.0735783	0.784914	1.04494	0.313258	0.0634185	0.504097
796	A0A4X1UYT9	UQCRQ	Cytochrome b-c1 complex subunit 8 OS=Sus scrofa OX=9823 GN=UQCRQ PE=1 SV=1	1.059	1.003	1.047	0.897	0.909	1.008	0.936	0.947	1.023	0.988	0.881	0.895	0.934	0.906	0.837	0.972	0.891	0.972	0.881	0.868	1.041	1.074	1.022	0.912	0.943	1.167	0.781	9	9	9	1.01611	0.734251	0.0230599	0.134156	0.952469	0.313581	-0.0702565	0.503651
94	A0A286ZRS0	GSS	Glutathione synthetase OS=Sus scrofa OX=9823 GN=GSS PE=1 SV=1	1.12	0.919	1.097	1.01	1.088	0.975	1.065	1.119	1.144	0.995	1.079	0.976	0.989	0.953	0.998	0.994	1.003	0.968	1.005	1.043	0.908	0.832	1	1.033	1.009	0.951	0.931	9	9	9	1.0947	0.0161931	0.130532	1.79067	1.02789	0.314886	0.0396895	0.501847
607	F1RX36	FGA	Fibrinogen alpha chain OS=Sus scrofa OX=9823 GN=FGA PE=1 SV=4	0.691	1.455	0.771	0.968	0.864	0.926	0.792	0.822	0.838	0.997	0.735	0.576	0.957	0.991	0.833	1.062	0.934	1.172	0.916	0.764	0.898	3.284	0.929	1.028	0.837	1.389	0.83	9	9	9	0.74731	0.297569	-0.420221	0.526412	0.759264	0.315082	-0.397326	0.501577
2874	A0A5S6IIV1	RNH1	Ribonuclease inhibitor OS=Sus scrofa OX=9823 GN=RNH1 PE=4 SV=2	0.965	0.93	1.027	1.125	0.989	1.042	1.01	1.14	1.072	0.972	0.945	0.889	0.948	0.983	1.061	1.098	1.025	0.99	0.971	1.073	0.921	0.91	0.974	1.165	1.095	0.997	1.174	9	9	9	1.00216	0.957027	0.00310591	0.0190759	0.960237	0.315226	-0.0585375	0.501378
1148	F1RQM2	PGM3	Phosphoacetylglucosamine mutase OS=Sus scrofa OX=9823 GN=PGM3 PE=1 SV=2	0.834	1.227	1.14	1.056	1.002	0.916	1.128	1.162	1.201	0.851	1.035	1.093	0.994	1.055	0.986	0.962	1.068	1.139	1.056	0.829	0.907	0.971	0.998	1.171	0.961	0.869	1.008	9	9	9	1.10217	0.0962651	0.140342	1.01653	1.04709	0.315693	0.0663887	0.500735
410	A0A8D1KEF5	CCT3	T-complex protein 1 subunit gamma OS=Sus scrofa OX=9823 GN=CCT3 PE=1 SV=1	1.113	1.166	0.952	0.856	0.949	1.012	1.037	1.07	1.024	0.994	1.09	1.092	0.936	0.938	0.942	0.991	0.988	0.923	1.09	0.881	1.039	0.927	0.884	0.647	1.057	0.974	0.933	9	9	9	1.08859	0.145276	0.122462	0.837806	1.05479	0.315796	0.0769575	0.500594
2965	E5F1H4	STAT6	Signal transducer and activator of transcription OS=Sus scrofa OX=9823 GN=STAT6 PE=2 SV=1	1.051	0.939	0.856	1.165	1.035	1.173	1.009	1.073	1.107	1.025	1.023	0.859	1.024	1.043	1.05	1.059	1.083	1.033	0.752	1.056	0.937	0.869	1.052	1.187	1.002	1.035	0.847	9	9	9	1.0768	0.201386	0.10675	0.69597	1.05288	0.316939	0.074339	0.499024
2308	A0A287ATT0	LEMD2	LEM domain nuclear envelope protein 2 OS=Sus scrofa OX=9823 GN=LEMD2 PE=1 SV=1	0.955	1.289	1.169	1.117	1.023	1.049	1.073	1.039	1.046	0.98	0.989	1.043	1.076	1.008	1.003	0.979	0.953	1.03	1.078	1.042	1.236	0.942	1	0.983	0.977	0.942	1.258	9	9	9	1.03193	0.52313	0.045346	0.281391	0.958025	0.317016	-0.0618649	0.498919
650	F1RNB1	SDF2	Stromal cell-derived factor 2 OS=Sus scrofa OX=9823 GN=SDF2 PE=1 SV=2	0.909	1.414	1.366	1.101	1.534	0.607	1.437	2.088	1.534	0.769	0.755	1.072	0.75	0.458	0.504	0.721	0.884	1.389	1.11	0.885	1.177	0.654	0.751	0.709	1.073	0.678	1.528	9	9	9	1.39988	0.0432842	0.485307	1.36367	0.852539	0.317717	-0.230162	0.49796
1788	A0A287B5J0	TBC1D9B	TBC1 domain family member 9B OS=Sus scrofa OX=9823 GN=TBC1D9B PE=4 SV=3	1.01	0.989	0.993	0.88	1.081	1.007	0.985	0.998	0.997	0.96	1.017	0.937	0.974	0.948	1.131	1.023	0.994	0.874	0.972	0.974	1.005	0.844	0.936	0.88	0.998	1.013	0.952	9	9	9	1.04269	0.13412	0.0603064	0.872505	1.03312	0.317767	0.0470126	0.497891
1146	F1RFI1	TUFM	Elongation factor Tu OS=Sus scrofa OX=9823 GN=TUFM PE=1 SV=2	1.105	1.016	1.076	0.892	0.978	0.972	1.006	1.064	1.084	1.034	0.973	0.989	0.987	0.989	0.946	1.029	0.974	0.987	1.015	0.979	1.071	0.889	0.986	0.916	0.968	1.011	0.82	9	9	9	1.06216	0.096935	0.0870019	1.01352	1.02923	0.318078	0.0415677	0.497467
3026	A0A287BBS4	ATP5F1A	ATP synthase subunit alpha OS=Sus scrofa OX=9823 GN=ATP5F1A PE=1 SV=2	1.103	1.044	1.091	0.958	0.911	1.025	1.013	1.106	1.145	1.03	0.941	0.953	0.962	0.99	0.94	0.977	0.938	0.955	0.993	1.024	1.062	0.916	1.012	0.952	0.977	0.993	0.929	9	9	9	1.06074	0.0648602	0.0850657	1.18802	0.980583	0.318467	-0.028289	0.496936
1421	A0A4X1U4W6	EIF3D	Eukaryotic translation initiation factor 3 subunit D OS=Sus scrofa OX=9823 GN=EIF3D PE=1 SV=1	1.085	1.053	1.124	0.984	1.023	1.09	1.049	0.954	1.03	1.003	1.07	1.041	1.083	1.132	1.04	0.991	1.043	1.072	1.002	1.022	1.107	0.973	1.081	0.979	1.103	1.026	0.965	9	9	9	1.01447	0.569905	0.0207318	0.244198	1.02344	0.318609	0.0334254	0.496742
766	A0A287ARZ1	TXNDC5	Thioredoxin domain containing 5 OS=Sus scrofa OX=9823 GN=TXNDC5 PE=1 SV=2	0.95	1.113	1.232	0.819	0.895	1.146	0.982	1.095	1.099	0.998	0.957	0.931	1.042	1.036	1.01	1.274	0.836	1.321	1.102	1.046	1.112	0.895	0.895	0.966	1.142	0.77	0.843	9	9	9	1.06385	0.33435	0.0892904	0.475799	1.07228	0.318707	0.100687	0.496609
2545	F1S155	SEC24D	SEC24 homolog D, COPII coat complex component OS=Sus scrofa OX=9823 GN=SEC24D PE=1 SV=3	1.07	0.948	1.052	0.996	0.909	1.01	0.986	0.962	1.089	1.117	1.01	0.94	0.956	1.084	1.018	1.022	0.98	1.028	0.85	0.92	1.034	1.132	0.912	0.803	1.139	1.093	0.811	9	9	9	1.03773	0.475963	0.0534272	0.322426	1.05303	0.319085	0.0745398	0.496094
916	A0A286ZPT0	COPB2	Coatomer subunit beta' OS=Sus scrofa OX=9823 GN=COPB2 PE=3 SV=3	1.082	0.979	1.03	1.059	1.005	0.971	0.966	1.019	0.973	1.034	0.94	0.979	1.022	0.922	1.068	1.003	1.004	0.988	1.071	0.991	1.057	1.001	1.109	1.037	0.972	0.914	1.036	9	9	9	0.988681	0.635638	-0.0164232	0.19679	0.975185	0.31923	-0.0362521	0.495896
1359	A0A5G2QJF8	IDH3G	Isocitrate dehydrogenase [NAD] subunit, mitochondrial OS=Sus scrofa OX=9823 GN=IDH3G PE=1 SV=2	0.946	1.052	1.043	1.025	0.88	1.02	1.067	0.997	0.949	1.004	0.886	0.974	0.912	0.894	0.934	1.048	1.024	0.894	0.974	0.928	1.08	0.74	1.067	1.417	1.083	0.97	0.92	9	9	9	0.978211	0.73745	-0.0317822	0.132267	0.933653	0.319265	-0.0990418	0.495848
689	A0A8W4FG05	MTA2	Metastasis associated 1 family member 2 OS=Sus scrofa OX=9823 GN=MTA2 PE=1 SV=1	0.966	0.941	0.959	1.108	0.947	0.947	1.042	1.035	1.036	0.993	0.906	0.886	0.971	0.977	1.027	0.985	0.993	0.982	0.941	1.034	0.935	0.947	1.073	1.148	0.932	0.948	1.039	9	9	9	0.998222	0.956972	-0.00256793	0.0191006	0.969212	0.319664	-0.0451159	0.495307
2812	F1RRN1	KLC4	Kinesin light chain OS=Sus scrofa OX=9823 GN=KLC4 PE=1 SV=2	0.944	0.967	1.041	1.03	1.174	1.08	1.011	1.15	1.28	0.911	0.798	0.873	0.991	1.237	1.062	1.116	0.99	0.983	0.988	1.132	1.038	0.967	1.089	1.16	1.036	0.973	1.039	9	9	9	1.02706	0.517644	0.0385265	0.285969	0.951072	0.320589	-0.0723736	0.494051
840	F1RR02	GFAP	Glial fibrillary acidic protein OS=Sus scrofa OX=9823 GN=GFAP PE=1 SV=3	1.233	0.95	0.736	0.988	1.02	0.91	1.001	0.87	0.942	1.141	0.848	0.929	0.956	1.042	0.777	1.048	1.098	1.007	1.079	1.148	0.805	0.689	0.588	1.057	1.019	0.944	0.824	9	9	9	1.06096	0.487577	0.0853691	0.311957	1.085	0.320787	0.117694	0.493783
2577	A0A287AZD5	MMP9	Matrix metalloproteinase-9 OS=Sus scrofa OX=9823 GN=MMP9 PE=3 SV=1	0.776	0.928	0.719	1.104	0.844	0.888	0.87	0.92	0.975	1.011	0.757	0.814	1.047	1.278	1.502	1.22	0.967	1.015	0.684	1.105	0.75	0.995	0.922	1.377	1	0.946	0.885	9	9	9	0.926131	0.372368	-0.110712	0.429027	1.1093	0.320905	0.149653	0.493624
474	A0A286ZIS8	NFYC	Nuclear transcription factor Y subunit gamma OS=Sus scrofa OX=9823 GN=NFYC PE=1 SV=1	1.005	1.065	0.936	0.982	1.062	0.883	0.986	0.856	0.861	1.115	0.775	1.012	1	1.012	0.975	0.933	0.969	0.997	1.024	1.143	1.026	0.784	0.97	1.156	0.904	1.059	1.226	9	9	9	0.929402	0.189604	-0.105626	0.722152	0.94576	0.320908	-0.0804543	0.493619
669	I3LCW1	FASN	Fatty acid synthase OS=Sus scrofa OX=9823 GN=FASN PE=1 SV=3	1.052	0.972	1.011	0.967	0.998	1.026	1.042	1.07	1.024	1.03	0.902	0.945	0.997	0.912	0.933	1.02	1.049	0.986	0.995	0.928	1	0.885	1.143	1.021	1.029	0.995	1.058	9	9	9	1.01193	0.666339	0.0171073	0.176305	0.969074	0.321964	-0.0453206	0.492193
1040	A0A287BL81	COL6A3	Collagen type VI alpha 3 chain OS=Sus scrofa OX=9823 GN=COL6A3 PE=1 SV=1	0.864	0.888	1.007	0.594	1.016	0.684	0.931	1.044	0.924	0.774	1.858	1.047	0.944	0.713	1.157	0.969	1.153	1.536	0.979	0.879	0.98	1.434	1.271	0.444	0.888	1.105	0.745	9	9	9	0.911404	0.445203	-0.133837	0.351442	1.16344	0.322791	0.218395	0.491079
2906	F1RP05	DNAJA2	DnaJ heat shock protein family (Hsp40) member A2 OS=Sus scrofa OX=9823 GN=DNAJA2 PE=1 SV=1	1.012	1.409	1.09	1.2	1.228	0.871	1.023	1.159	0.916	0.853	1.031	1.13	0.999	0.721	0.915	0.638	0.947	1.01	1.139	0.9	1.24	1.065	0.89	1.002	0.771	0.794	1.137	9	9	9	1.10853	0.187856	0.148642	0.726174	0.922354	0.322922	-0.116608	0.490903
2404	A0A8W4FP09	MME	Neprilysin OS=Sus scrofa OX=9823 GN=MME PE=1 SV=1	0.993	0.943	0.921	0.737	0.86	0.854	1.098	1.185	1.151	0.982	0.96	0.986	1.084	0.921	0.808	1.063	1.062	1.032	1.158	1.115	1.114	0.936	0.774	1.338	0.899	1.003	1.146	9	9	9	0.92186	0.288803	-0.11738	0.539398	0.938311	0.322924	-0.0918624	0.490899
341	F1SSH5	NPC1L1	NPC1 like intracellular cholesterol transporter 1 OS=Sus scrofa OX=9823 GN=NPC1L1 PE=1 SV=2	1.097	1.098	1.178	1.183	1.123	1.295	1.262	1.39	1.395	0.839	1.124	0.845	0.924	1.092	1.032	1.037	1.263	1.077	0.979	1.056	1.073	1.01	1.058	1.031	1.085	1.2	1.239	9	9	9	1.13257	0.00972059	0.179595	2.01231	0.948823	0.322987	-0.0757886	0.490815
2134	A0A287BHA3	RCC1	Regulator of chromosome condensation OS=Sus scrofa OX=9823 GN=RCC1 PE=1 SV=1	1.059	0.943	0.914	0.959	0.906	0.865	1.062	1.057	1.18	1.068	0.906	0.98	0.92	0.944	0.959	1.019	1.028	0.995	0.936	1.086	0.956	0.881	0.835	0.999	0.975	0.985	0.883	9	9	9	1.04791	0.297405	0.0675213	0.526651	1.03315	0.323257	0.0470549	0.490452
1507	A0A480WPU1	ENO1	phosphopyruvate hydratase OS=Sus scrofa OX=9823 GN=ENO1 PE=1 SV=1	1.07	0.972	1.06	0.968	0.968	1.065	1.044	1.052	1.075	1.012	0.911	0.973	0.942	1.009	0.897	0.955	0.971	1.035	0.962	0.917	0.983	0.89	0.963	0.796	1.064	0.984	0.865	9	9	9	1.1009	0.00845364	0.138686	2.07296	1.03336	0.323679	0.0473389	0.489886
1438	Q9TRC7	AOC1	Diamine oxidase [copper-containing] OS=Sus scrofa OX=9823 GN=AOC1 PE=1 SV=3	1.216	1.088	1.171	0.803	0.946	0.876	1.018	1.007	1.145	1.079	1.123	0.972	0.908	0.9	0.873	1.012	1.029	1.052	1.206	1.037	1.279	0.954	0.952	0.956	1	1.039	0.975	9	9	9	0.98638	0.81823	-0.0197844	0.0871245	0.952117	0.323835	-0.0707885	0.489676
901	A0A4X1TKA1	PPP1CB	Serine/threonine-protein phosphatase OS=Sus scrofa OX=9823 GN=PPP1CB PE=1 SV=1	1.04	1.249	1.126	1.204	1.201	1.089	1.019	1.187	1.049	1.071	1.025	1.018	1.152	1.06	1.124	0.997	1.033	0.992	0.986	0.971	0.904	1.166	1.157	1.008	1.07	0.972	0.887	9	9	9	1.11435	0.0171713	0.156204	1.7652	1.03848	0.323867	0.0544771	0.489633
1654	A0A287BQU9	Uncharacterized protein OS=Sus scrofa OX=9823 PE=3 SV=3	Uncharacterized protein OS=Sus scrofa OX=9823 PE=3 SV=3	0.922	1.119	0.885	0.953	0.977	1.159	1.064	1.103	1.134	0.931	0.895	0.879	0.962	1.224	1.155	1.044	1.081	1.006	0.916	1.041	0.987	1.023	0.979	0.835	1.036	1.021	0.918	9	9	9	1.06396	0.15265	0.0894387	0.816302	1.04808	0.324245	0.0677507	0.489126
120	F1RGY5	NID1	Nidogen 1 OS=Sus scrofa OX=9823 GN=NID1 PE=1 SV=4	0.868	0.971	0.984	0.918	0.944	0.963	0.986	1.122	1.132	0.896	0.886	0.924	0.95	0.979	0.972	0.982	1.024	0.988	0.926	0.991	0.915	0.856	0.807	0.991	1.011	0.918	0.94	9	9	9	1.06379	0.125636	0.089219	0.900888	1.02944	0.324937	0.0418646	0.488201
194	A0A8D0NCR9	PPP1R8	Protein phosphatase 1 regulatory subunit 8 OS=Sus scrofa OX=9823 GN=PPP1R8 PE=1 SV=1	0.903	0.815	0.927	1.17	0.882	0.867	0.983	0.671	0.728	1.021	0.919	0.995	1.09	0.921	1.015	1.006	0.963	0.873	1.027	1.128	1.045	0.846	0.967	1.336	0.888	0.959	1.103	9	9	9	0.8545	0.0439641	-0.226847	1.3569	0.946661	0.32538	-0.0790803	0.487609
2938	K7GS22	ATP synthase F1 subunit epsilon OS=Sus scrofa OX=9823 PE=1 SV=1	ATP synthase F1 subunit epsilon OS=Sus scrofa OX=9823 PE=1 SV=1	1.145	1.09	1.082	0.929	1.065	0.84	1.105	1.205	1.18	1.039	1.031	1.07	1.058	0.929	1.006	0.966	1.052	1.131	1.015	1.024	1.045	1.009	1.532	1.147	1.092	0.933	1.056	9	9	9	0.978484	0.741641	-0.0313803	0.129806	0.942048	0.32569	-0.0861274	0.487196
2822	I3LAT6	IARS1	isoleucine--tRNA ligase OS=Sus scrofa OX=9823 GN=IARS1 PE=1 SV=3	0.94	0.976	1.071	1.145	1.043	1.054	0.982	0.996	1.024	1.043	0.902	0.979	0.891	0.96	1.081	0.933	0.944	0.945	0.959	1.038	0.983	0.976	1.246	1.062	0.918	0.907	0.958	9	9	9	1.02034	0.61789	0.0290475	0.209089	0.959213	0.326081	-0.0600769	0.486674
3073	F1RQX3	NEU1	Sialidase-1 OS=Sus scrofa OX=9823 GN=NEU1 PE=3 SV=2	0.995	0.991	1.212	1.343	1.183	1.358	0.951	0.789	0.955	0.963	0.892	0.82	0.933	1.095	1.162	0.894	0.893	0.875	1.135	0.939	0.915	1.1	1.264	1.019	1.019	0.908	0.781	9	9	9	1.07676	0.354061	0.1067	0.450922	0.939097	0.326236	-0.090654	0.486468
2663	Q06A98	SRSF2	Serine/arginine-rich splicing factor 2 OS=Sus scrofa OX=9823 GN=SRSF2 PE=2 SV=1	0.985	1.067	1.096	1.066	1.188	0.719	1.047	1.204	1.046	0.977	0.775	0.932	1.073	0.588	0.775	0.732	0.975	0.904	1.012	0.813	1.055	0.839	1.183	1.004	0.888	0.783	0.783	9	9	9	1.12656	0.0959205	0.171918	1.01809	0.924761	0.326404	-0.112848	0.486244
656	A0A480PGC6	NUP93	Nuclear pore complex protein Nup93 OS=Sus scrofa OX=9823 GN=NUP93 PE=1 SV=1	1.011	0.965	0.923	1.073	0.956	0.888	1.076	0.996	1.045	1.029	0.896	0.926	1.013	0.917	0.949	0.985	1.041	0.95	0.987	1.015	1.013	0.895	0.952	1.102	0.942	0.965	1.098	9	9	9	0.995986	0.901456	-0.00580238	0.0450554	0.970677	0.327532	-0.0429371	0.484746
2898	F1RU38	SF3B2	Splicing factor 3B subunit 2 OS=Sus scrofa OX=9823 GN=SF3B2 PE=1 SV=3	1.131	1.111	1.087	1.005	0.95	1.036	1.04	1.035	1.052	1.045	0.991	1.03	0.995	0.983	1.034	0.974	0.954	0.995	1.039	1.013	1.157	1.005	0.949	1.002	1.017	0.997	1.017	9	9	9	1.02729	0.30323	0.0388498	0.518227	0.978795	0.328099	-0.0309212	0.483995
637	F1S1X9	TXNL1	Thioredoxin like 1 OS=Sus scrofa OX=9823 GN=TXNL1 PE=1 SV=2	1.135	0.867	0.956	0.811	0.953	0.959	1.082	0.62	0.661	0.904	1.068	1.004	0.82	0.951	1.052	1.126	1.131	0.98	0.893	1.096	0.934	0.833	0.857	0.952	0.916	1.063	1.066	9	9	9	0.934262	0.360569	-0.0981002	0.443012	1.04948	0.328575	0.069671	0.483366
2864	A0A140UHW4	MRPL3	Large ribosomal subunit protein uL3m OS=Sus scrofa OX=9823 GN=MRPL3 PE=1 SV=1	0.943	1.07	1.129	1.031	1.002	0.624	1.126	1.206	1.174	0.934	0.912	1.1	1.289	0.718	0.726	0.874	0.941	1.044	1.005	0.948	1.076	0.735	1.099	1.097	0.895	0.993	1.561	9	9	9	0.988947	0.904844	-0.0160352	0.0434261	0.907429	0.328924	-0.140143	0.482905
1078	I3LDL8	PRPF4	Pre-mRNA processing factor 4 OS=Sus scrofa OX=9823 GN=PRPF4 PE=1 SV=2	1.025	0.896	0.891	0.976	0.868	0.955	1.175	1.075	1.161	1.007	0.809	0.913	0.85	0.865	0.917	0.996	1.099	1.037	0.988	1.095	0.949	0.711	0.884	1.136	0.987	0.968	1.496	9	9	9	0.979162	0.797158	-0.0303803	0.0984553	0.92175	0.329228	-0.117553	0.482503
523	A0A286ZPR8	UQCRB	Cytochrome b-c1 complex subunit 7 OS=Sus scrofa OX=9823 GN=UQCRB PE=1 SV=3	1.143	0.859	0.96	0.885	0.82	0.762	0.976	1.001	1.103	1.076	0.947	1.022	0.976	0.838	0.87	1.021	0.931	0.921	1.028	0.971	1.14	0.829	0.864	1.061	0.967	1.014	1.122	9	9	9	0.945865	0.339942	-0.0802941	0.468595	0.956203	0.329328	-0.0646115	0.482371
2573	A0A287BCE6	FCGBP	VWFD domain-containing protein OS=Sus scrofa OX=9823 GN=FCGBP PE=1 SV=2	1.057	0.946	0.928	0.777	0.904	0.916	0.984	0.926	1.055	1.095	0.935	0.905	0.98	0.957	0.863	1.021	0.948	0.985	0.982	0.899	1.035	0.921	0.882	1.25	0.989	0.989	1.17	9	9	9	0.931556	0.186489	-0.102285	0.729348	0.953055	0.329456	-0.069369	0.482203
2334	F1RY04	UFL1	E3 UFM1-protein ligase 1 OS=Sus scrofa OX=9823 GN=UFL1 PE=1 SV=4	1.031	1.066	0.984	0.975	0.968	0.956	0.989	1.015	0.997	1.117	1.039	1.063	0.967	0.937	0.964	0.973	0.964	0.965	1.07	1.032	1.124	0.868	1.079	1.089	0.96	0.929	1.204	9	9	9	0.960021	0.283819	-0.0588616	0.546958	0.960877	0.329627	-0.057577	0.481977
2473	A0A287BLN4	RAB3D	Ras-related protein Rab-3 OS=Sus scrofa OX=9823 GN=RAB3D PE=1 SV=2	1.142	1.646	1.259	0.859	0.906	0.577	0.984	1.117	0.885	0.939	1.078	1.271	1.024	0.588	0.766	0.798	0.922	1.105	1.19	0.944	1.225	0.822	1.252	1.071	0.816	0.731	1.36	9	9	9	0.996175	0.974964	-0.00552934	0.0110114	0.902242	0.329889	-0.148414	0.481633
931	F1SED4	PREB	Prolactin regulatory element-binding protein OS=Sus scrofa OX=9823 GN=PREB PE=1 SV=3	0.976	0.948	1.017	1.036	1.002	1.045	0.97	0.974	1.032	0.905	0.787	0.917	0.978	1.043	0.903	1.014	1.048	0.925	1.012	1.055	1.057	0.82	0.903	1.077	0.936	0.931	1.114	9	9	9	1.01067	0.764318	0.0153094	0.116726	0.956766	0.330376	-0.0637622	0.480991
1586	F1S1L1	TIMM8A	Mitochondrial import inner membrane translocase subunit OS=Sus scrofa OX=9823 GN=TIMM8A PE=1 SV=1	1.186	1.324	1.222	1.071	1.074	1.158	1.829	2.08	1.567	1.18	1.174	1.01	0.895	0.975	1.084	1.478	1.276	1.379	1.072	1.152	1.077	1.151	1.333	1.049	1.369	1.273	2.282	9	9	9	1.06404	0.63939	0.0895544	0.194234	0.888842	0.330712	-0.170002	0.480551
1186	F1RPB7	DRG1	Developmentally-regulated GTP-binding protein 1 OS=Sus scrofa OX=9823 GN=DRG1 PE=1 SV=3	1.333	1.282	1.351	0.768	0.764	0.918	0.926	1.043	1.039	1.301	1.15	1.206	0.821	0.839	0.924	0.929	1.108	0.877	1.052	1.069	1.066	0.88	0.617	0.857	0.913	0.738	1.199	9	9	9	1.12311	0.257889	0.167497	0.588567	1.09105	0.331111	0.125717	0.480026
42	I3LEF2	NXN	Nucleoredoxin OS=Sus scrofa OX=9823 GN=NXN PE=3 SV=3	1.024	0.917	0.908	1.031	1.021	0.994	0.905	0.979	0.978	0.929	0.795	0.895	1.03	1.115	1.056	0.973	0.915	0.836	0.816	1.055	0.918	0.82	0.917	0.933	0.918	0.862	0.923	9	9	9	1.0729	0.0400271	0.101514	1.39765	1.0468	0.331255	0.0659889	0.479837
212	A0A5G2RN87	AGPS	Alkylglycerone-phosphate synthase OS=Sus scrofa OX=9823 GN=AGPS PE=1 SV=1	0.891	0.906	0.896	0.975	0.955	1.038	0.855	0.976	0.977	0.947	0.839	0.865	0.974	0.955	0.897	1.094	0.884	0.901	0.906	0.886	0.871	0.96	0.939	1.124	0.914	1.062	1.045	9	9	9	0.972666	0.46547	-0.0399841	0.332109	0.959688	0.331806	-0.0593632	0.479116
1658	Q2EHH8	PPP1CA	Serine/threonine-protein phosphatase OS=Sus scrofa OX=9823 GN=PPP1CA PE=1 SV=1	1.1	1.101	1.178	1.062	1.035	1.048	1.104	1.049	1.067	1.092	1.053	1.106	0.995	0.986	0.999	1.003	1	0.951	1.036	0.985	1.152	0.959	0.998	1.025	0.873	0.976	0.885	9	9	9	1.09619	0.0104219	0.132493	1.98205	1.0333	0.331924	0.0472586	0.478961
486	F1SSE8	COL15A1	Collagen type XV alpha 1 chain OS=Sus scrofa OX=9823 GN=COL15A1 PE=1 SV=4	1.046	0.865	0.99	0.961	0.947	0.951	1.057	1.007	1.1	0.887	0.89	0.889	1.032	1.046	1.138	1.088	1.029	1.004	0.843	0.972	0.902	0.833	0.88	1.096	0.978	1.067	1.031	9	9	9	1.03743	0.38456	0.0530184	0.415036	1.04662	0.33209	0.0657337	0.478744
1629	A0A287B088	PSMB4	Proteasome subunit beta OS=Sus scrofa OX=9823 GN=PSMB4 PE=1 SV=1	1.267	1.18	1.198	1.12	1.062	1.035	1.05	1.067	1.11	1.15	1.232	1.316	1.027	1.047	1.023	1.067	0.986	0.992	1.096	1.051	1.271	1.135	1.034	0.996	0.954	0.894	0.914	9	9	9	1.07961	0.103269	0.110517	0.986028	1.05297	0.332609	0.0744637	0.478066
1485	F1RGG1	RPS19	Small ribosomal subunit protein eS19 OS=Sus scrofa OX=9823 GN=RPS19 PE=1 SV=4	0.992	1.243	1.093	0.93	1.182	0.733	1.08	1.191	1.182	0.998	1.148	1.124	1.145	0.668	0.732	0.89	1.04	1.059	1.143	0.909	1.102	1.029	1.524	0.889	0.866	0.987	1.165	9	9	9	1.00125	0.987915	0.00179962	0.0052806	0.915748	0.332612	-0.126978	0.478062
2043	A0A286ZRU9	SERPINH1	Serpin H1 OS=Sus scrofa OX=9823 GN=SERPINH1 PE=1 SV=1	1.055	0.974	1.091	1.122	1.094	0.989	1.025	1.041	1.037	1.076	1.008	0.93	0.989	1.133	1.096	1.198	0.927	1.075	0.918	0.996	0.965	1.209	1.044	0.926	1.023	1.086	0.842	9	9	9	1.04651	0.260467	0.0655848	0.584248	1.04695	0.332664	0.0661967	0.477994
76	A0A287ARE6	GIGYF2	GRB10 interacting GYF protein 2 OS=Sus scrofa OX=9823 GN=GIGYF2 PE=3 SV=2	0.985	1.016	1.032	0.96	1.035	1.196	0.923	1.088	1.133	1.066	0.96	1.1	0.954	1.389	1.285	0.88	0.912	0.961	0.969	0.986	1.215	1.085	0.961	0.92	0.995	0.856	0.901	9	9	9	1.05401	0.26167	0.0758823	0.582246	1.06964	0.333056	0.0971313	0.477482
302	F1RGI7	MATR3	Matrin 3 OS=Sus scrofa OX=9823 GN=MATR3 PE=1 SV=3	1.07	0.997	0.998	0.993	0.991	0.76	1.1	0.904	0.731	1.043	0.973	1.066	1.117	0.867	0.96	0.989	1.001	0.9	1.05	1.052	1.048	0.943	1.036	1.15	0.892	0.98	1.097	9	9	9	0.923875	0.141567	-0.11423	0.849037	0.9641	0.333307	-0.0527448	0.477156
1475	F1SMC0	CAP1	Adenylyl cyclase-associated protein OS=Sus scrofa OX=9823 GN=CAP1 PE=1 SV=4	0.977	0.942	1.018	0.935	1.07	0.844	1.014	1.006	1.093	0.928	0.975	0.933	1	0.926	0.87	1.018	1.05	0.941	0.994	0.792	0.939	1.024	1.067	0.873	1.106	1.051	1.213	9	9	9	0.982338	0.722228	-0.0257086	0.141326	0.953858	0.333362	-0.0681535	0.477084
2489	F1SLI4	DHX30	ATP-dependent RNA helicase DHX30 OS=Sus scrofa OX=9823 GN=DHX30 PE=1 SV=4	1.061	1.062	1.077	1.155	1.001	1.072	1.002	1.022	1.126	1.018	0.979	1.049	1.102	0.987	0.934	1.118	1.034	0.984	1.031	0.962	1.075	0.908	1.236	1.271	0.937	1.054	1.163	9	9	9	0.993878	0.890634	-0.00885967	0.0503009	0.955173	0.333867	-0.0661664	0.476427
164	A0A5G2QR31	S100A11	Protein S100 OS=Sus scrofa OX=9823 GN=S100A11 PE=1 SV=1	0.712	1.77	1.743	1.268	1.366	0.493	1.041	1.462	0.885	0.717	1.32	1.619	0.819	0.436	0.621	0.79	0.749	1.201	1.05	0.66	0.992	0.797	0.353	0.614	0.849	0.437	1.126	9	9	9	1.5615	0.0276647	0.642933	1.55807	1.20268	0.334267	0.266247	0.475907
1944	A0A4X1UGE4	EIF4A2	Eukaryotic initiation factor 4A-II OS=Sus scrofa OX=9823 GN=EIF4A2 PE=1 SV=1	1.145	1.064	0.952	0.886	1.022	1.132	0.986	0.9	0.949	1.016	0.947	0.988	0.914	1.088	1.015	1.003	0.962	0.954	0.961	0.852	1.026	1.021	1.02	0.809	0.981	1.091	0.737	9	9	9	1.06331	0.252899	0.0885609	0.597053	1.04578	0.334604	0.0645731	0.475469
320	A0A8W4FBS4	ACO2	Aconitate hydratase, mitochondrial OS=Sus scrofa OX=9823 GN=ACO2 PE=1 SV=1	0.746	1.131	1.159	0.897	1.058	0.449	0.974	1.25	1.05	1.239	0.868	0.967	0.893	0.396	0.569	0.916	0.705	0.87	1.197	0.767	1.14	0.738	1.024	0.942	0.772	0.712	1.044	9	9	9	1.04535	0.687404	0.0639798	0.162788	0.890475	0.334663	-0.167353	0.475392
1701	A0A5G2RKN9	SLFN11	Schlafen family member 11 OS=Sus scrofa OX=9823 GN=SLFN11 PE=1 SV=1	1.091	1.179	0.977	1.109	1.094	1.123	0.94	1.027	1.064	1.328	1.055	0.971	0.965	1.013	0.911	0.973	1.097	1.069	1.066	1.028	1.178	0.865	1.029	0.805	0.865	0.879	1.129	9	9	9	1.08593	0.120645	0.118936	0.91849	1.06083	0.334908	0.0851965	0.475074
2420	F1S235	DHX40	RNA helicase OS=Sus scrofa OX=9823 GN=DHX40 PE=1 SV=1	1.034	0.975	0.867	1.232	1.014	1.127	0.87	0.968	0.775	1.118	0.961	0.941	1.008	1.118	0.843	0.978	0.855	0.683	1.011	0.914	0.899	1.031	1.204	1.184	0.865	0.853	1.122	9	9	9	0.975669	0.710544	-0.0355366	0.148409	0.936365	0.334928	-0.0948576	0.475049
1842	A0A287A6R9	LCLAT1	Lysocardiolipin acyltransferase 1 OS=Sus scrofa OX=9823 GN=LCLAT1 PE=1 SV=2	0.983	1.137	1.119	1.065	1.096	1.246	0.917	0.951	1.132	0.911	0.895	0.903	1.023	1.042	1.049	1.09	0.986	0.99	0.851	0.901	0.986	0.834	1.195	0.85	1.015	1.01	0.821	9	9	9	1.13978	0.0267755	0.188762	1.57226	1.05034	0.334944	0.070852	0.475028
1739	A0A287AZ22	TOM1	Target of myb1 membrane trafficking protein OS=Sus scrofa OX=9823 GN=TOM1 PE=1 SV=1	1.017	0.924	0.948	1.038	1.009	0.918	0.988	0.896	0.953	1.036	1.101	0.964	0.963	0.948	1.013	0.911	1.001	0.914	1.048	1.025	0.908	0.851	1.042	1.314	1.027	0.989	1.076	9	9	9	0.93653	0.18313	-0.0946026	0.73724	0.953772	0.33536	-0.0682843	0.474489
2036	F1RM78	LSR	Lipolysis stimulated lipoprotein receptor OS=Sus scrofa OX=9823 GN=LSR PE=3 SV=4	0.964	0.687	0.738	0.94	0.795	0.882	1.123	1.076	1.46	0.936	0.646	0.74	0.824	0.881	0.764	1.362	1.073	1.144	0.886	0.821	0.828	0.856	0.963	1.345	1.131	1.181	1.264	9	9	9	0.934232	0.522929	-0.0981475	0.281557	0.902426	0.335519	-0.14812	0.474283
601	A0A5G2QMX8	CYBC1	Essential for reactive oxygen species protein OS=Sus scrofa OX=9823 GN=CYBC1 PE=1 SV=1	1.048	0.964	0.988	1.119	1.018	0.821	0.978	0.978	1.032	1.083	0.919	0.943	1.094	0.914	1.037	0.901	0.969	1.021	0.972	1.126	1.021	0.972	0.994	1.237	0.894	0.945	1.11	9	9	9	0.964944	0.432508	-0.0514822	0.364006	0.957933	0.335794	-0.0620028	0.473927
1087	A0A287BNF7	C1QA	Complement C1q subcomponent subunit A OS=Sus scrofa OX=9823 GN=C1QA PE=4 SV=2	0.966	0.975	0.9	1.089	1.053	0.818	0.824	1.135	1.32	1.162	1.144	0.861	0.98	0.772	0.9	1.018	0.925	0.958	1.172	0.992	0.991	1.077	1.009	1.106	0.87	0.8	1.28	9	9	9	0.976659	0.743992	-0.034073	0.128432	0.937937	0.335843	-0.0924371	0.473863
2403	A0A287BBJ7	ALDH3A2	Aldehyde dehydrogenase family 3 member A2 OS=Sus scrofa OX=9823 GN=ALDH3A2 PE=1 SV=2	1.137	0.996	1.099	1.063	0.989	1.124	1.02	1.046	1.071	1.057	1.034	0.985	0.975	1.072	1.06	1.066	1.021	1.011	0.921	0.943	1.033	1.057	1.152	1.023	0.97	1.052	0.821	9	9	9	1.06387	0.105102	0.0893156	0.97839	1.03444	0.335887	0.0488506	0.473807
833	A0A287BD18	CFH	Complement factor H OS=Sus scrofa OX=9823 GN=CFH PE=1 SV=1	0.843	1.034	0.933	1.053	1.104	0.936	0.956	0.871	1.061	0.979	0.841	0.815	1.105	1.156	1.074	1.145	0.999	0.98	0.968	0.874	0.889	1.371	1.097	1.217	0.948	1.107	1.264	9	9	9	0.90303	0.137516	-0.147154	0.861648	0.934155	0.335933	-0.098266	0.473748
1982	A0A481APG3	U2AF2	Splicing factor U2AF subunit OS=Sus scrofa OX=9823 GN=U2AF2 PE=3 SV=1	1.05	1.017	1.15	1.171	1.086	1.28	1.173	1.296	1.08	0.914	0.922	0.934	0.901	0.97	0.953	0.892	1.059	1.072	0.806	0.959	1.007	1.126	1.543	0.997	1.004	0.946	0.899	9	9	9	1.1094	0.171259	0.14978	0.766347	0.927856	0.336027	-0.108027	0.473626
1971	A0A8W4FFH6	EPPK1	Epiplakin OS=Sus scrofa OX=9823 GN=EPPK1 PE=4 SV=1	1.023	0.881	0.985	0.903	0.946	0.999	1.01	1.081	1.117	1.008	0.943	0.946	0.954	0.899	0.901	1.004	0.961	0.923	0.987	0.984	1.035	0.796	0.943	1.142	0.926	1.029	1.004	9	9	9	1.01119	0.789126	0.0160562	0.102854	0.965295	0.336068	-0.0509581	0.473573
950	B1NI70	AK4	Adenylate kinase 4, mitochondrial OS=Sus scrofa OX=9823 GN=AK4 PE=1 SV=1	1.223	1.046	1.206	1.104	0.989	1.17	0.857	1.093	1.047	1.073	1.014	1.086	1.007	1.168	1.06	0.831	0.989	1.047	1.212	1.141	1.003	0.813	0.904	0.859	1.09	0.907	0.835	9	9	9	1.11079	0.0993431	0.151591	1.00286	1.05831	0.336693	0.0817578	0.472766
2819	I3LK71	HNRNPC	Heterogeneous nuclear ribonucleoproteins C1/C2 isoform X1 OS=Sus scrofa OX=9823 GN=HNRNPC PE=1 SV=2	1.093	1.105	1.128	1.01	1.067	1.201	1.031	1.132	0.964	1.025	0.951	0.984	0.945	0.966	0.979	0.914	0.96	1.027	0.989	0.979	1.05	0.939	1.123	0.91	0.923	0.967	1.159	9	9	9	1.07656	0.0602508	0.106425	1.22004	0.968138	0.336752	-0.0467153	0.47269
1303	I3LCF5	GNPTAB	N-acetylglucosamine-1-phosphate transferase subunits alpha and beta OS=Sus scrofa OX=9823 GN=GNPTAB PE=3 SV=2	1.13	1.041	1.285	1.146	1.267	1.189	1.032	1.075	1.112	1.153	0.731	1.093	0.982	0.939	1.118	1.001	1.004	0.892	0.989	1.055	0.923	1.094	1.241	1.232	0.999	0.946	0.956	9	9	9	1.08924	0.0808547	0.123325	1.09229	0.944674	0.336761	-0.0821114	0.472679
2150	A0A5G2RD82	EEF1B2	Elongation factor 1-beta OS=Sus scrofa OX=9823 GN=EEF1B2 PE=1 SV=1	1.171	1.143	1.293	1.02	1.142	1.021	1.139	1.145	1.259	1.098	0.986	1.03	0.952	0.947	0.933	1.124	0.967	1.275	1.017	1.12	1.076	1.022	1.121	0.907	1.147	1.543	0.995	9	9	9	1.0387	0.537913	0.0547808	0.269288	0.936068	0.336881	-0.0953154	0.472523
685	A0A287ABD7	XPC	XPC complex subunit, DNA damage recognition and repair factor OS=Sus scrofa OX=9823 GN=XPC PE=1 SV=1	1.033	1.233	1.088	1.174	1.152	1.298	1.208	1.074	0.954	1.038	0.874	0.917	0.924	0.941	1.04	1.147	1.219	1.208	0.958	0.95	0.911	1.036	1.3	1.011	1.058	1.404	1.377	9	9	9	1.02089	0.758311	0.0298268	0.120153	0.930335	0.337235	-0.104178	0.472068
1645	F1S5L0	VTI1A	Vesicle transport through interaction with t-SNAREs 1A OS=Sus scrofa OX=9823 GN=VTI1A PE=3 SV=4	1.005	1.068	1.074	1.081	1.009	0.592	1.319	1.224	0.976	0.969	1.002	0.947	0.893	0.626	0.793	0.942	0.871	1.093	0.968	0.892	1.017	0.792	0.908	1.011	1.132	0.846	1.089	9	9	9	1.08007	0.334041	0.111124	0.4762	0.940035	0.337385	-0.0892141	0.471874
1344	A0A287BGK6	LRRC40	Leucine-rich repeat-containing protein 40 OS=Sus scrofa OX=9823 GN=LRRC40 PE=1 SV=2	1.079	1.213	1.231	1.081	1.035	1.205	1.032	1.151	1.192	1.006	1.071	0.899	0.919	1.015	1.075	1.019	1.021	1.101	1.075	1.095	1.028	0.932	1.097	1.12	1.051	1.103	0.922	9	9	9	1.08447	0.0261199	0.116996	1.58303	0.968481	0.33761	-0.0462038	0.471584
1843	A0A4X1TDZ9	MYO1D	Unconventional myosin-Id OS=Sus scrofa OX=9823 GN=MYO1D PE=1 SV=1	1.198	1.028	1.151	0.959	1.053	0.913	0.932	1.069	1.02	1.172	0.999	1.024	1.083	1.022	0.924	1.096	0.963	0.932	1.158	1.032	1.165	0.94	1.147	1.105	0.956	0.994	1.072	9	9	9	0.974292	0.534883	-0.0375739	0.271741	0.963006	0.337708	-0.054384	0.471458
591	F1S9H9	ACP1	Low molecular weight phosphotyrosine protein phosphatase OS=Sus scrofa OX=9823 GN=ACP1 PE=1 SV=4	1.01	0.932	0.889	1.009	0.987	0.983	1.048	0.788	0.937	1.07	0.893	0.911	0.975	1.019	1.032	1.075	1.058	0.915	0.947	1.044	0.939	0.97	0.962	1.249	0.988	1.144	1.086	9	9	9	0.920034	0.0785694	-0.12024	1.10475	0.95916	0.338048	-0.0601572	0.471022
1515	A0A287AE16	SCIN	Scinderin OS=Sus scrofa OX=9823 GN=SCIN PE=1 SV=1	1.135	1.065	1.104	0.97	1.024	0.877	0.998	0.996	1.021	1.103	0.936	0.99	0.949	0.939	0.896	1.05	0.924	0.995	1.068	1.01	1.19	0.85	0.941	1.001	0.952	1.02	1.104	9	9	9	1.00591	0.887233	0.00850221	0.0519624	0.961252	0.338163	-0.0570131	0.470874
1527	A0A0U2ETD0	EMD	Emerin OS=Sus scrofa OX=9823 GN=EMD PE=4 SV=1	1.114	0.931	0.931	1.015	1.032	0.951	1.036	0.951	0.927	1.08	1.142	1.017	1.02	1.031	1.001	1.077	0.945	0.987	0.961	1.054	1.007	0.939	0.871	0.874	1.051	1.018	1.184	9	9	9	0.992075	0.84376	-0.0114789	0.073781	1.03806	0.338424	0.053893	0.470539
352	A0A287AQ40	ZFP91	ZFP91 zinc finger protein, atypical E3 ubiquitin ligase OS=Sus scrofa OX=9823 GN=ZFP91 PE=1 SV=2	1.074	1.235	1.238	1.164	1.16	1.372	1.077	1.127	1.034	1.088	0.987	1.031	0.937	1.083	1.138	0.967	1.047	0.932	1.024	1.028	1.058	0.986	1.121	0.973	1.077	1.11	1.1	9	9	9	1.10594	0.0148582	0.145274	1.82803	0.971827	0.338778	-0.0412293	0.470085
2311	A0A5G2RH65	SRPRA	SRP receptor subunit alpha OS=Sus scrofa OX=9823 GN=SRPRA PE=3 SV=1	1.172	1.153	1.072	0.974	0.912	0.732	1.075	1.249	1.334	1.005	1.008	1.084	1.008	0.75	0.918	1.069	1.199	1.064	1.019	0.901	1.064	0.909	1.038	1.276	1.045	1.092	1.324	9	9	9	1.00052	0.99438	0.000745926	0.00244783	0.941767	0.339039	-0.0865585	0.46975
1206	F1RG17	NME3	Nucleoside diphosphate kinase OS=Sus scrofa OX=9823 GN=NME3 PE=1 SV=3	0.946	0.817	0.891	0.924	0.914	0.895	0.994	0.972	1.06	1.118	0.816	0.841	0.888	0.884	0.949	1	0.997	0.88	0.971	0.997	0.918	0.82	0.963	1.087	0.929	0.965	1.101	9	9	9	0.961376	0.322328	-0.0568275	0.491702	0.956805	0.339402	-0.0637033	0.469285
1583	A0A8D0QQ23	CALU	Calumenin OS=Sus scrofa OX=9823 GN=CALU PE=1 SV=1	1.002	0.95	0.979	1.159	1.027	0.831	0.91	0.837	0.945	1.025	0.971	1.023	0.999	0.924	1.095	1.014	0.961	0.91	1.07	1.115	1.047	0.896	0.975	0.962	1.025	1.064	1.026	9	9	9	0.941176	0.157126	-0.0874628	0.803753	0.971895	0.339491	-0.041127	0.469171
2230	A0A5G2R301	PIGT	Phosphatidylinositol glycan anchor biosynthesis class T OS=Sus scrofa OX=9823 GN=PIGT PE=1 SV=1	1	0.784	0.807	0.751	0.705	0.761	1.013	1.23	1.108	0.846	0.625	0.91	1.06	0.794	0.849	1.119	1.089	1.05	0.81	0.796	0.883	1.313	0.97	1.651	0.948	0.991	0.937	9	9	9	0.877406	0.272943	-0.188683	0.563929	0.897086	0.339609	-0.156682	0.469021
189	A0A5G2QNC6	UCHL3	Ubiquitin carboxyl-terminal hydrolase OS=Sus scrofa OX=9823 GN=UCHL3 PE=1 SV=1	0.979	1.017	1.095	1.076	0.964	1.118	1.081	1.023	1.022	0.967	0.916	0.896	1.039	1.111	1.233	1.01	0.997	0.916	0.99	1.006	0.961	0.92	1.233	1.29	1.08	1.019	1.071	9	9	9	0.979624	0.638631	-0.0297002	0.19475	0.949321	0.339646	-0.0750324	0.468973
1068	A0A287B6X3	CRYL1	L-gulonate 3-dehydrogenase OS=Sus scrofa OX=9823 GN=CRYL1 PE=1 SV=1	1.003	1.079	1.059	1.008	1	0.934	0.987	0.955	0.825	0.96	1.217	0.929	1.186	0.982	0.933	0.989	0.928	0.982	0.99	0.915	1.155	0.863	0.808	0.99	0.946	0.989	1.013	9	9	9	1.02088	0.63308	0.0298119	0.198541	1.05041	0.340365	0.0709519	0.468055
319	F1SJT1	EXOG	Exo/endonuclease G OS=Sus scrofa OX=9823 GN=EXOG PE=1 SV=4	0.962	0.857	0.832	0.926	0.852	0.863	1.128	0.745	0.703	0.991	0.857	0.966	0.984	0.949	0.933	1.095	0.991	0.856	0.872	1.02	1.018	0.745	1.064	1.191	0.826	1.084	1.537	9	9	9	0.840868	0.0842122	-0.250049	1.07463	0.921449	0.340509	-0.118023	0.467872
1042	F2Z5P0	SEC61B	SEC61 translocon subunit beta OS=Sus scrofa OX=9823 GN=SEC61B PE=1 SV=2	1.18	1.03	1.09	0.942	0.987	0.935	1.017	1.196	1.066	1.055	1.082	1.003	0.954	0.989	0.973	0.912	0.902	1.088	0.895	0.995	1.088	0.989	1.176	1.236	0.91	0.843	1.435	9	9	9	0.987039	0.849334	-0.0188213	0.0709214	0.936344	0.340679	-0.0948899	0.467655
1880	A0A5G2QZI2	APOOL	MICOS complex subunit OS=Sus scrofa OX=9823 GN=APOOL PE=1 SV=1	1.028	1.255	1.449	1.272	1.281	1.33	1.078	1.09	1.069	1.233	1.098	1.067	1.154	1.153	1.115	1.031	0.961	0.999	1.087	1.198	1.199	1.057	1.418	1.215	1.144	1.116	0.877	9	9	9	1.05247	0.391935	0.0737767	0.406785	0.951508	0.340682	-0.0717122	0.467651
1179	A0A287B893	TSR1	Pre-rRNA-processing protein TSR1 homolog OS=Sus scrofa OX=9823 GN=TSR1 PE=3 SV=3	1.089	0.975	1.016	1.22	1.143	1.274	1.075	1.11	1.139	1.119	0.973	0.965	1.219	0.959	1.137	0.885	0.987	0.941	0.985	1.047	0.967	1.119	1.368	1.378	0.905	0.868	1.195	9	9	9	1.02126	0.745992	0.0303461	0.127266	0.934194	0.341265	-0.0982052	0.466908
2385	A0A5G2Q8V3	ATP13A1	ATPase 13A1 OS=Sus scrofa OX=9823 GN=ATP13A1 PE=1 SV=1	0.823	0.869	0.907	1.091	1.029	0.828	0.943	0.983	0.906	0.986	0.935	0.903	1.162	1.133	1.136	1.008	1.016	1.021	0.997	0.975	0.906	0.828	0.892	1.221	0.992	0.984	1.075	9	9	9	0.944645	0.277578	-0.082156	0.556616	1.04848	0.341667	0.0682966	0.466397
2	Q8WNQ7	GALNS	N-acetylgalactosamine-6-sulfatase OS=Sus scrofa OX=9823 GN=GALNS PE=2 SV=1	1.126	1.181	1.262	1.15	1.062	1.016	1.076	1.19	1.091	1.023	1.01	1.09	1.005	0.894	0.981	0.894	0.933	0.94	1.02	0.977	1.005	0.913	1.076	1.144	0.974	1	0.941	9	9	9	1.12199	0.00257822	0.166058	2.58868	0.969061	0.342229	-0.0453409	0.465684
948	A0A287B720	THOC6	THO complex subunit 6 OS=Sus scrofa OX=9823 GN=THOC6 PE=1 SV=1	1.026	0.899	0.887	0.977	0.958	1.031	1.101	0.932	1.023	0.96	0.878	0.928	0.946	0.968	0.919	0.969	1.14	1.06	0.998	0.974	0.929	0.891	0.949	1.192	1.008	1.135	1.063	9	9	9	0.966627	0.412983	-0.0489695	0.384067	0.959405	0.342557	-0.0597885	0.465267
2711	F1SD66	CHGA	Chromogranin-A OS=Sus scrofa OX=9823 GN=CHGA PE=1 SV=3	1.101	0.909	0.919	0.912	0.928	0.891	0.923	0.866	0.943	0.936	0.874	0.962	1.01	0.984	0.887	0.963	0.949	0.91	0.969	0.89	1.098	0.844	0.864	1.135	0.97	0.858	1.457	9	9	9	0.92372	0.294948	-0.114472	0.530255	0.932856	0.342622	-0.100273	0.465184
250	A0A286ZIE8	SLC25A4	ADP/ATP translocase OS=Sus scrofa OX=9823 GN=SLC25A4 PE=1 SV=1	0.9	1.039	1.189	1.064	1.119	1.264	0.94	1.176	1.12	0.958	0.855	0.909	1.046	0.958	1.049	1.049	1.078	1.23	1.045	1.022	0.925	0.99	0.959	0.86	1.058	1.061	0.785	9	9	9	1.12705	0.0278403	0.172556	1.55533	1.04905	0.343615	0.0690866	0.463928
789	F1SHY2	NEMF	Nuclear export mediator factor OS=Sus scrofa OX=9823 GN=NEMF PE=3 SV=3	1.047	0.991	0.895	1.314	1.377	0.621	0.871	0.894	0.926	1.063	0.986	0.969	1.062	0.671	0.692	0.909	0.828	0.832	0.93	1.027	0.908	0.904	1.118	0.888	0.84	0.812	1.128	9	9	9	1.04454	0.632662	0.0628613	0.198828	0.936528	0.344099	-0.0946054	0.463316
1484	A0A5S8LD69	IKBKG	NF-kappa-B essential modulator OS=Sus scrofa OX=9823 GN=IKBKG PE=4 SV=2	0.958	0.895	0.844	1.162	0.879	0.765	1.142	1.146	1.158	0.992	0.899	1.201	1.015	1.026	0.999	1.225	1.264	1.049	0.961	1.062	0.945	0.852	0.766	1.203	1.039	1.135	1.149	9	9	9	0.982112	0.802793	-0.0260413	0.0953964	1.06124	0.34444	0.0857481	0.462887
801	F1SHI5	BAZ1A	Bromodomain adjacent to zinc finger domain 1A OS=Sus scrofa OX=9823 GN=BAZ1A PE=4 SV=2	0.852	0.664	0.823	0.873	0.705	0.726	1.001	1.018	0.833	0.848	0.581	0.706	0.629	0.719	0.634	1.155	0.946	0.929	0.862	0.825	0.813	0.528	0.99	0.587	0.96	1.071	1.546	9	9	9	0.916035	0.492234	-0.126525	0.307829	0.873503	0.344998	-0.195116	0.462184
2950	F1RST0	HSPH1	Heat shock protein 105 kDa OS=Sus scrofa OX=9823 GN=HSPH1 PE=1 SV=1	1.03	1.32	1.122	0.977	1.034	1.103	1.031	0.96	0.971	1.022	0.912	0.936	0.97	1.01	1.004	0.899	0.949	0.821	1.034	0.937	1.082	1.083	1.132	0.909	0.92	0.946	0.83	9	9	9	1.07607	0.154786	0.105777	0.810268	0.960554	0.345018	-0.0580606	0.462158
1957	A0A287AJS0	ARHGEF1	Rho guanine nucleotide exchange factor 1 OS=Sus scrofa OX=9823 GN=ARHGEF1 PE=1 SV=2	1.082	1.012	0.996	0.97	1.008	0.886	1.018	1.075	1.181	1.01	0.928	1.005	0.947	0.981	0.984	0.942	1.112	0.969	0.956	1.044	0.967	0.959	1.06	0.956	1.005	0.986	1.353	9	9	9	0.993754	0.899785	-0.00903928	0.0458612	0.956063	0.345024	-0.0648226	0.462151
962	A0A287B8X7	DNM2	dynamin GTPase OS=Sus scrofa OX=9823 GN=DNM2 PE=1 SV=2	1.091	0.919	0.959	1.036	0.968	0.963	1.013	0.906	0.949	1.02	0.824	0.938	1.065	0.976	0.997	1.003	0.974	0.95	0.938	1.008	0.96	0.892	0.984	1.131	1.02	0.98	1.15	9	9	9	0.971422	0.416111	-0.0418295	0.38079	0.965133	0.345265	-0.0512004	0.461847
349	A0A8W4FP75	STAG2	Cohesin subunit SA OS=Sus scrofa OX=9823 GN=STAG2 PE=1 SV=1	0.925	0.971	1.237	0.943	1.184	1.151	1.112	1.033	0.959	0.808	0.501	0.807	0.744	0.781	0.896	0.762	1.018	1.155	0.903	0.682	0.802	1.469	1.057	0.822	0.867	0.972	0.762	9	9	9	1.14143	0.156408	0.190848	0.80574	0.896353	0.345418	-0.157861	0.461655
1115	Q29381	DDOST	Dolichyl-diphosphooligosaccharide--protein glycosyltransferase 48 kDa subunit OS=Sus scrofa OX=9823 GN=DDOST PE=1 SV=2	1.057	1.12	1.16	1.044	0.998	1.179	1	1.07	1.132	1.082	1.064	0.983	0.963	1.084	1.032	1.023	0.932	0.992	0.967	1.054	1.039	1.054	1.008	0.954	1.02	0.965	0.844	9	9	9	1.09601	0.00802873	0.132266	2.09535	1.02807	0.345695	0.0399443	0.461307
1013	A0A287A2Q7	COL2A1	Collagen type II alpha 1 chain OS=Sus scrofa OX=9823 GN=COL2A1 PE=1 SV=2	0.866	0.835	0.852	0.76	0.87	0.745	0.914	0.697	0.531	0.807	1.752	0.848	0.91	1.231	1.172	1.291	1.003	1.119	1.065	0.954	0.944	1.223	0.797	0.769	1.063	1.195	1.146	9	9	9	0.772171	0.00376228	-0.373007	2.42455	1.10671	0.346554	0.146272	0.460229
919	A0A287BFZ2	EPB41L2	Erythrocyte membrane protein band 4.1 like 2 OS=Sus scrofa OX=9823 GN=EPB41L2 PE=1 SV=1	1.078	0.961	0.96	0.966	0.941	0.977	0.9	1.009	1.011	1.016	0.887	0.911	0.977	0.926	1.03	1.082	1.004	0.949	0.897	1.055	0.967	0.919	0.891	1.153	1.035	1.019	1.241	9	9	9	0.959246	0.354825	-0.0600273	0.449986	0.956958	0.346557	-0.0634731	0.460225
1350	F1RNH0	MBOAT7	Lysophospholipid acyltransferase 7 OS=Sus scrofa OX=9823 GN=MBOAT7 PE=1 SV=3	1.122	1.082	1.048	1.138	1.057	0.879	0.974	0.878	1.102	1.133	0.973	1.113	1.123	0.882	1.087	0.909	0.856	0.783	1.092	1.032	1.168	0.869	1.103	1.376	0.945	0.957	0.914	9	9	9	0.981387	0.756144	-0.0271052	0.121396	0.936865	0.34756	-0.0940862	0.45897
1481	A0A4X1UMT8	SMU1	WD40 repeat-containing protein SMU1 OS=Sus scrofa OX=9823 GN=SMU1 PE=1 SV=1	1.059	0.927	1.139	1.042	1.095	1.137	1.018	0.98	0.952	1.115	0.706	0.936	0.973	0.806	1.039	0.947	0.871	0.864	0.921	1.011	1.038	0.892	1.243	1.154	0.896	0.975	0.706	9	9	9	1.05806	0.347743	0.0814186	0.458741	0.934473	0.347805	-0.0977757	0.458664
2555	A0A287B8J6	EXOC7	Exocyst complex component 7 OS=Sus scrofa OX=9823 GN=EXOC7 PE=1 SV=2	0.909	0.863	0.873	1.013	0.949	0.819	0.81	0.729	0.667	0.889	0.89	0.862	1	0.943	0.986	0.923	0.852	0.765	0.867	0.982	0.874	0.89	0.742	0.851	0.984	0.752	0.845	9	9	9	0.980095	0.709546	-0.0290065	0.14902	1.04148	0.347876	0.0586343	0.458575
1282	A0A287AEA5	ALDH16A1	Aldehyde dehydrogenase 16 family member A1 OS=Sus scrofa OX=9823 GN=ALDH16A1 PE=1 SV=2	1.029	0.952	0.916	0.967	0.899	0.874	1.07	1.112	1.087	1.034	0.939	0.997	0.952	0.878	0.923	0.989	1.049	1.041	1.03	1.035	1.02	0.855	0.929	1.026	0.94	1.083	1.26	9	9	9	0.970364	0.537611	-0.0434022	0.269532	0.959032	0.347905	-0.0603484	0.458539
1770	I3LPH5	G3BP2	G3BP stress granule assembly factor 2 OS=Sus scrofa OX=9823 GN=G3BP2 PE=1 SV=2	1.049	1.095	1.091	1.066	0.993	0.797	1.163	1.167	1.068	0.999	1.009	1.078	1.056	0.907	0.787	0.98	1.108	1.085	1.081	0.971	1.114	1.032	1.141	0.904	0.915	0.967	1.474	9	9	9	0.98854	0.861765	-0.0166281	0.0646114	0.938535	0.348072	-0.0915171	0.458331
2759	A0A8W4FBN6	HNRNPA3	RRM domain-containing protein OS=Sus scrofa OX=9823 GN=HNRNPA3 PE=1 SV=1	1.039	1.714	1.796	1.536	0.95	0.649	1.072	1.359	1.131	0.89	0.999	1.308	1.288	0.592	0.604	0.667	0.809	1	1.485	0.812	1.281	0.869	0.943	1.305	0.879	0.751	0.915	9	9	9	1.2171	0.167413	0.283447	0.776212	0.882792	0.349439	-0.179854	0.456629
690	K7GRN9	NIBAN1	Niban apoptosis regulator 1 OS=Sus scrofa OX=9823 GN=NIBAN1 PE=1 SV=2	1.049	1.223	1.09	1.081	1.095	0.972	1.066	1.072	1.302	0.968	0.919	1.045	1.05	1.031	1.043	1.135	1.181	0.995	0.887	1.035	1.116	1.047	1.253	1.277	1.106	0.806	1.5	9	9	9	0.992321	0.913697	-0.0111216	0.0391979	0.934178	0.34954	-0.0982311	0.456503
1006	A0A4X1VW11	PDLIM3	PDZ and LIM domain protein 3 OS=Sus scrofa OX=9823 GN=PDLIM3 PE=1 SV=1	0.924	0.976	1.08	1.024	0.932	1.019	0.974	1.091	1.112	0.955	0.921	0.916	0.864	1.061	1.043	1.009	1.051	1.026	0.977	1.144	0.93	0.752	0.67	0.923	1.036	0.936	1.01	9	9	9	1.09	0.141629	0.124325	0.848846	1.05586	0.349689	0.0784194	0.456318
50	F1SNL7	CNDP2	Cytosolic non-specific dipeptidase OS=Sus scrofa OX=9823 GN=CNDP2 PE=1 SV=1	1.122	1.199	1.133	0.964	1.054	0.997	1.092	1.112	1.159	1.034	0.983	0.972	1.088	0.981	0.967	0.987	1.014	1.014	0.97	0.971	1.037	0.852	1.116	0.941	0.961	0.947	1.006	9	9	9	1.11715	0.00469814	0.159817	2.32807	1.02716	0.349886	0.0386553	0.456074
1363	A0A286ZJM4	MCM7	DNA replication licensing factor MCM7 OS=Sus scrofa OX=9823 GN=MCM7 PE=3 SV=1	1.078	1.013	1.019	1.066	1.037	1.061	1.113	1.109	1.043	1.086	0.862	1.033	0.963	0.923	0.982	0.885	1.03	0.847	0.955	1.037	0.984	1.011	1.196	1.041	0.833	0.924	1.003	9	9	9	1.06178	0.107597	0.0864801	0.968202	0.958482	0.350299	-0.0611771	0.455561
2346	F1RXP8	EXOC2	Exocyst complex component 2 OS=Sus scrofa OX=9823 GN=EXOC2 PE=1 SV=3	0.934	0.819	0.851	1.069	0.998	1.009	1.033	1.032	1.073	0.968	0.951	0.9	1.015	0.858	0.993	1.043	1.092	0.943	0.938	1.133	0.912	0.965	1.12	0.981	0.921	0.899	1.484	9	9	9	0.942799	0.411108	-0.0849777	0.386044	0.936919	0.350371	-0.0940043	0.455472
2364	A0A8W4FK46	CDK1	Cyclin dependent kinase 1 OS=Sus scrofa OX=9823 GN=CDK1 PE=1 SV=1	0.958	1.202	1.409	1.188	0.994	1.066	1.027	1.018	0.986	1.149	0.908	0.967	0.943	0.979	1.057	0.926	1.021	0.758	0.938	1.199	0.923	0.976	1.062	1.272	0.818	1.06	0.974	9	9	9	1.06788	0.319981	0.0947511	0.494875	0.944264	0.350989	-0.0827383	0.454707
1892	A0A480KKH4	UAP1	UDP-N-acetylglucosamine pyrophosphorylase 1 OS=Sus scrofa OX=9823 GN=UAP1 PE=1 SV=1	1.008	0.932	0.956	0.817	0.824	0.607	1.042	1.134	1.07	1.04	0.863	1.074	1.121	0.64	0.691	0.913	0.952	1.117	1.12	0.856	1.168	0.7	1.296	1.062	0.942	0.906	1.091	9	9	9	0.917843	0.318206	-0.123681	0.497291	0.92014	0.351206	-0.120075	0.454439
790	F1RFM7	AIMP2	Aminoacyl tRNA synthase complex-interacting multifunctional protein 2 OS=Sus scrofa OX=9823 GN=AIMP2 PE=1 SV=2	0.999	1.327	1.431	1.009	1.116	0.791	1.009	1.266	1.18	1.073	0.939	1.094	1.033	0.793	0.883	0.891	0.895	0.961	1.115	0.953	1.09	0.945	1.127	0.951	0.939	0.817	1.035	9	9	9	1.12885	0.108575	0.174848	0.964271	0.954302	0.351247	-0.0674818	0.454388
2977	A0A8W4FMK2	MRPS27	Mitochondrial ribosomal protein S27 OS=Sus scrofa OX=9823 GN=MRPS27 PE=1 SV=1	0.841	0.942	0.906	0.965	1.081	0.875	1.02	1.106	1.154	1.051	0.775	0.798	1.047	0.91	0.999	0.882	0.918	1.023	0.927	0.835	0.958	0.924	1.145	1.084	0.893	0.877	1.278	9	9	9	0.996525	0.955588	-0.00502202	0.0197292	0.941935	0.351492	-0.086301	0.454084
2600	I3LLX8	SULT1A3	Sulfotransferase OS=Sus scrofa OX=9823 GN=SULT1A3 PE=1 SV=3	0.955	1.278	1.331	1.24	0.981	0.847	1.125	1.083	0.953	1.042	0.759	1.122	1.096	0.939	1.176	1.064	1.233	0.974	0.816	0.987	0.85	0.962	1.103	0.963	1.102	1.282	0.687	9	9	9	1.11894	0.174166	0.162138	0.759036	1.07461	0.35159	0.103815	0.453963
2644	A0A287AE54	HK3	hexokinase OS=Sus scrofa OX=9823 GN=HK3 PE=1 SV=3	1.049	1.108	1.002	1.303	1.015	0.76	0.842	0.767	0.732	1.028	1.086	1.272	1.041	0.918	1.144	1.078	1.095	0.908	0.971	0.939	1.105	0.958	0.984	1.2	0.843	0.834	1.22	9	9	9	0.947427	0.515219	-0.077914	0.288008	1.05699	0.351957	0.0799636	0.453511
1377	A0A286ZQV9	BABAM1	BRISC and BRCA1-A complex member 1 OS=Sus scrofa OX=9823 GN=BABAM1 PE=3 SV=1	0.93	0.89	0.963	1.084	1.082	0.921	1.011	1.019	0.972	0.834	0.892	0.942	1.22	0.982	1.072	1.057	1.022	1.022	1.008	0.953	0.913	0.977	1.189	1.203	1.026	0.936	1.422	9	9	9	0.921575	0.194636	-0.117827	0.710776	0.939337	0.352019	-0.0902848	0.453434
1398	A0A287B778	UBE2O	Ubiquitin conjugating enzyme E2 O OS=Sus scrofa OX=9823 GN=UBE2O PE=1 SV=1	1.043	0.933	0.9	0.983	0.98	1.026	0.955	0.943	1.08	1.097	1.074	0.932	0.995	1.044	0.948	1.003	0.965	0.868	0.921	0.998	0.947	0.943	1.143	1.138	0.911	1.103	1.214	9	9	9	0.949023	0.240876	-0.0754844	0.618207	0.957931	0.352146	-0.0620065	0.453277
1518	A0A287AB58	ISG15	ISG15 ubiquitin like modifier OS=Sus scrofa OX=9823 GN=ISG15 PE=1 SV=1	0.979	0.935	0.901	0.925	1.195	1.171	0.861	1.571	0.933	0.941	0.835	0.981	0.849	0.9	0.847	1.395	1.26	0.996	0.847	1	0.986	0.825	0.786	1.199	0.869	1.035	0.755	9	9	9	1.14081	0.169465	0.190058	0.770919	1.08456	0.352443	0.117107	0.452912
375	F1ST39	FXR2	FMR1 autosomal homolog 2 OS=Sus scrofa OX=9823 GN=FXR2 PE=1 SV=2	0.94	0.946	0.933	0.914	0.998	0.929	1.036	0.93	1.008	0.978	0.833	0.897	0.954	0.833	1.018	1.008	0.923	0.964	0.901	0.99	0.906	0.802	0.995	1.143	0.946	0.953	1.155	9	9	9	0.982141	0.674847	-0.0259982	0.170795	0.956433	0.352512	-0.0642646	0.452826
667	A0A287AAX8	CC2D1A	Coiled-coil and C2 domain containing 1A OS=Sus scrofa OX=9823 GN=CC2D1A PE=1 SV=1	0.966	0.997	0.99	0.991	0.992	1.062	0.924	0.968	1.038	1.041	1.091	1.002	0.978	1.12	1.046	1.02	0.977	0.898	0.998	1.196	1.06	0.828	0.772	1.03	1.034	0.908	0.927	9	9	9	1.01999	0.67504	0.0285595	0.170671	1.04798	0.352644	0.0676161	0.452664
2737	A0A287AUX8	CCT3	T-complex protein 1 subunit gamma OS=Sus scrofa OX=9823 GN=CCT3 PE=1 SV=1	1.126	1.12	1.155	0.973	1.058	0.883	1.016	1.144	1.149	1.09	0.828	0.971	0.876	0.893	0.931	0.925	0.952	1.057	1.09	1.061	0.966	0.936	1.301	0.879	1.05	1.055	0.713	9	9	9	1.06331	0.327635	0.0885594	0.48461	0.941664	0.353455	-0.0867159	0.451666
2289	A0A287AS76	NmrA-like domain-containing protein OS=Sus scrofa OX=9823 PE=3 SV=2	NmrA-like domain-containing protein OS=Sus scrofa OX=9823 PE=3 SV=2	1.227	0.704	0.953	1.283	1.067	0.682	1.043	0.888	0.96	0.579	1.138	0.811	1.107	1.103	1.301	1.5	0.929	0.953	0.737	0.679	1.137	1.197	0.747	0.698	1.24	1.184	0.75	9	9	9	1.05234	0.657345	0.0735954	0.182206	1.1257	0.35351	0.170825	0.451598
2418	I3LI68	SI	Sucrase-isomaltase OS=Sus scrofa OX=9823 GN=SI PE=1 SV=3	1.044	0.748	0.912	0.71	0.769	1.007	0.903	1.085	1.28	1.048	0.862	0.821	0.881	0.902	0.718	1.133	0.935	0.888	1.033	0.92	1.034	0.828	0.73	1.058	1.038	1.236	0.866	9	9	9	0.967402	0.695953	-0.0478118	0.15742	0.936521	0.354361	-0.0946173	0.450554
1998	A0A5G2QBV2	NUP133	Nucleoporin 133 OS=Sus scrofa OX=9823 GN=NUP133 PE=1 SV=2	1.011	1.151	1.177	1.034	1.07	0.883	1.094	1.116	1.07	0.936	0.967	1.054	1.007	0.962	0.938	0.868	0.993	0.928	1.01	1.025	0.979	0.907	1.125	0.938	0.929	0.91	1.113	9	9	9	1.07498	0.0811571	0.104307	1.09067	0.96833	0.354364	-0.0464288	0.45055
2750	A0A287BK80	LMF2	Lipase maturation factor OS=Sus scrofa OX=9823 GN=LMF2 PE=1 SV=1	0.88	1.282	1.506	1.022	1.05	0.822	1.182	1.045	1.063	0.798	1.183	0.932	1.023	0.876	0.882	1.116	1.162	1.091	0.936	0.982	1.019	1.101	1.041	0.902	1.14	1.173	1.313	9	9	9	1.0255	0.742942	0.0363306	0.129045	0.943375	0.354431	-0.0840973	0.450468
581	A0A5S6HQH9	DGKA	Diacylglycerol kinase OS=Sus scrofa OX=9823 GN=DGKA PE=3 SV=1	1.028	1.008	0.865	0.949	0.892	1.064	1.087	1.027	1.215	1.089	1.064	1.044	0.909	1.005	1.124	1.288	1.024	1.024	1.005	1.036	1.043	0.85	0.708	0.793	1.146	1.024	1.34	9	9	9	1.02124	0.776371	0.0303232	0.109931	1.06998	0.354568	0.0975882	0.450301
2225	A0A287BMB6	HNRNPAB	Heteroous nuclear ribonucleoprotein A/B OS=Sus scrofa OX=9823 GN=HNRNPAB PE=1 SV=1	1.094	1.107	1.111	0.97	1.035	0.924	1.053	0.995	1.087	1.063	0.926	1.039	1.191	0.873	0.937	0.864	0.913	0.963	1.133	0.94	1.174	0.991	1.107	0.894	1.216	1.047	0.777	9	9	9	1.01045	0.841407	0.0150032	0.0749938	0.945037	0.354854	-0.081557	0.44995
2184	K7GPS0	MAP2K2	Dual specificity mitogen-activated protein kinase kinase 2 OS=Sus scrofa OX=9823 GN=MAP2K2 PE=1 SV=3	1.083	0.943	0.932	0.898	1.038	1.16	0.922	0.791	0.9	1.012	0.99	0.889	1.107	1.311	1.082	0.972	1.028	0.954	0.969	1.081	1.007	1.063	0.902	0.897	1.211	0.959	0.744	9	9	9	0.981207	0.753646	-0.0273708	0.122832	1.05796	0.356456	0.0812912	0.447994
2547	F1RNX2	PDCD5	Programmed cell death 5 OS=Sus scrofa OX=9823 GN=PDCD5 PE=3 SV=2	1.112	1.145	1.136	1.251	1.183	1.327	1.149	1.216	1.174	1.006	0.955	0.941	0.976	1.076	1.105	0.95	1.149	1.043	1.013	1.065	1.039	0.921	1.335	1.231	1.077	0.866	1.122	9	9	9	1.10591	0.0546345	0.145228	1.26253	0.951598	0.356526	-0.071576	0.447908
2855	F1RKF9	CUX1	Homeobox protein cut-like OS=Sus scrofa OX=9823 GN=CUX1 PE=1 SV=4	0.999	0.98	0.95	1.049	0.963	1.106	1.071	0.971	1.117	1.051	0.976	0.899	0.988	1.008	1.166	1.056	1.054	1.05	0.992	1.084	0.884	1.008	1.204	1.271	1.015	1.08	1.102	9	9	9	0.954979	0.294776	-0.0664587	0.530507	0.959336	0.356829	-0.0598917	0.44754
1302	F1SNZ3	LIMD1	LIM domain-containing protein 1 OS=Sus scrofa OX=9823 GN=LIMD1 PE=1 SV=3	1.018	0.983	0.876	1.12	1.1	1.269	0.976	1.26	1.357	0.976	2.012	0.809	1.049	1.079	1.081	1.132	1.038	0.975	0.908	1.039	0.929	1.058	1.204	1.198	0.984	1	0.758	9	9	9	1.09705	0.18763	0.133626	0.726698	1.1182	0.357557	0.161175	0.446655
1970	A0A287BAA7	2	Myeloid leukemia factor 2 OS=Sus scrofa OX=9823 GN=MLF2 PE=1 SV=1	1.185	1.144	1.301	0.746	0.775	0.735	1.147	1.188	1.269	1.061	0.881	1.122	0.999	0.908	0.88	0.921	1.057	1.017	1.149	1.1	1.022	0.896	0.938	0.981	0.89	0.951	1.64	9	9	9	0.991951	0.938915	-0.0116585	0.0273737	0.924637	0.357975	-0.113041	0.446147
2963	A0A287ADE6	RPS15A	Small ribosomal subunit protein uS8 OS=Sus scrofa OX=9823 GN=RPS15A PE=1 SV=2	1.049	1.091	1.182	1.105	1.167	1.132	0.987	1.127	1.232	1.04	0.882	0.941	0.975	1.04	0.986	1.061	1.033	1.082	1.105	1.049	1.014	1.169	1.212	0.922	1.047	1.027	0.86	9	9	9	1.07092	0.115322	0.0988503	0.938087	0.961191	0.358046	-0.0571052	0.446061
467	A0A287A082	DHX34	DExH-box helicase 34 OS=Sus scrofa OX=9823 GN=DHX34 PE=4 SV=1	1.203	1.306	1.171	0.966	0.941	0.978	0.915	1.141	1.009	1.403	1.085	0.969	1.139	0.849	0.926	1.287	1.079	1.104	1.27	1.116	0.922	1.175	1.103	1.011	1.383	1.177	1.33	9	9	9	0.91828	0.177116	-0.122994	0.751741	0.9384	0.358297	-0.0917252	0.445757
2637	A0A287BFX8	TRMT5	tRNA (guanine(37)-N1)-methyltransferase OS=Sus scrofa OX=9823 GN=TRMT5 PE=1 SV=1	0.992	1.114	1.138	1.041	0.755	0.905	1.158	1.051	1.115	0.946	0.941	0.921	0.977	0.99	1.049	0.959	0.981	0.971	0.953	1.036	0.875	0.969	1.028	1.083	0.907	0.799	0.74	9	9	9	1.10477	0.109533	0.143743	0.960454	1.04112	0.358515	0.0581369	0.445493
165	A0A5G2QMA5	FAM114A1	Family with sequence similarity 114 member A1 OS=Sus scrofa OX=9823 GN=FAM114A1 PE=1 SV=1	0.885	0.942	0.902	0.866	0.912	0.856	0.978	0.829	0.91	1	1.025	1.058	1.211	0.938	0.828	0.926	0.962	0.922	1.042	0.961	0.947	0.994	1.058	1.238	0.946	0.917	1.223	9	9	9	0.866395	0.00837333	-0.206903	2.0771	0.951104	0.358801	-0.0723243	0.445147
679	A0A287ATJ4	CRYAB	Alpha-crystallin B chain OS=Sus scrofa OX=9823 GN=CRYAB PE=1 SV=1	0.872	1.042	1.234	0.994	1.013	1.257	0.989	1.027	1.025	1.019	0.881	0.861	0.984	1.101	1.097	0.963	0.912	1.055	0.933	1.025	0.872	1	1.013	0.878	1.048	0.96	0.795	9	9	9	1.10899	0.0546554	0.149242	1.26237	1.04094	0.358992	0.0578914	0.444915
2687	A0A287BBT3	LOC100517129	Nuclear autoantigen Sp-100 OS=Sus scrofa OX=9823 GN=LOC100517129 PE=4 SV=3	1.095	1.278	1.25	1.085	1.186	0.931	1.138	1.136	1.173	1.122	0.979	1.14	1.156	1.012	1.046	0.946	1.109	1.036	1.186	1.069	1.173	1.058	1.021	1.095	0.989	0.957	1.561	9	9	9	1.01612	0.797893	0.0230768	0.0980551	0.944307	0.359061	-0.082672	0.444832
2953	A0A5K1UGB8	GGT1	Glutathione hydrolase OS=Sus scrofa OX=9823 GN=GGT1 PE=3 SV=1	0.994	1.049	0.897	0.951	0.885	0.784	1.064	0.795	0.822	1.033	0.873	1.046	1.002	1.058	0.94	1.217	1.122	1.213	0.901	1.095	1.024	0.82	0.963	0.972	0.942	1.154	1.169	9	9	9	0.911615	0.110496	-0.133503	0.956652	1.05133	0.359305	0.0722121	0.444537
984	A0A287A837	LZIC	Protein LZIC OS=Sus scrofa OX=9823 GN=LZIC PE=3 SV=2	0.986	1.135	1.076	0.86	1.276	1.258	1.144	1.149	1.09	1.012	0.947	0.88	1.057	0.967	0.995	1.123	1.059	1.056	0.904	0.88	0.966	1.004	1.099	0.905	1.133	1.032	0.805	9	9	9	1.14276	0.0250263	0.192521	1.6016	1.04216	0.360201	0.0595812	0.443455
1628	A0A287BCK2	TRIM56	RING-type E3 ubiquitin transferase OS=Sus scrofa OX=9823 GN=TRIM56 PE=3 SV=1	1.054	1	0.969	0.909	0.899	0.861	1.107	1.112	1.195	1.001	0.894	1.06	1.026	0.937	0.999	1.06	1.013	0.985	0.897	1.004	1.018	0.841	0.82	1.13	1.026	1.026	0.877	9	9	9	1.05406	0.327548	0.0759531	0.484726	1.03889	0.360333	0.0550476	0.443296
2218	K7GL74	PRPS2	Ribose-phosphate pyrophosphokinase 2 OS=Sus scrofa OX=9823 GN=PRPS2 PE=3 SV=3	1.03	1.23	1.358	1.154	1.175	0.775	1.031	1.37	1.274	1.05	0.995	0.994	1.189	0.682	0.849	0.516	0.729	0.994	0.979	0.827	1.03	0.795	1.716	1.062	0.887	0.644	1.109	9	9	9	1.14897	0.230691	0.200337	0.636969	0.883855	0.360344	-0.178119	0.443282
323	A0A4X1V5G4	DNAJB1	DnaJ heat shock protein family (Hsp40) member B1 OS=Sus scrofa OX=9823 GN=DNAJB1 PE=1 SV=1	1.032	1.165	1.269	1.083	1.081	0.885	0.956	1.107	1.045	0.982	0.978	0.915	1.014	0.86	0.991	0.988	1.028	0.953	0.927	1.054	1.02	1.02	1.038	0.934	0.908	0.957	1.081	9	9	9	1.07652	0.0987897	0.106373	1.00529	0.97427	0.36045	-0.0376064	0.443155
1760	A0A5G2QR34	PGD	6-phosphogluconate dehydrogenase, decarboxylating OS=Sus scrofa OX=9823 GN=PGD PE=1 SV=1	1.135	1.058	1.117	1	1.001	1.073	1.026	1.049	1.058	1.038	1.005	1.046	0.955	0.982	0.969	1.17	1.037	1.044	0.963	0.92	1.046	1.011	0.977	0.766	1.141	1.109	0.95	9	9	9	1.07137	0.106851	0.0994599	0.971223	1.04086	0.360872	0.0577824	0.442647
1345	A0A287AMT7	HERC6	HECT and RLD domain containing E3 ubiquitin protein ligase family member 6 OS=Sus scrofa OX=9823 GN=HERC6 PE=4 SV=1	0.635	0.958	1.153	0.746	0.876	1.06	0.971	1.224	1.145	0.93	1.227	0.743	0.928	0.907	0.737	0.959	0.988	1.011	0.802	0.986	0.736	0.461	0.511	0.734	1.085	0.892	1.336	9	9	9	1.1624	0.246247	0.217109	0.608628	1.11759	0.361111	0.160394	0.442359
368	I3LHX0	EIPR1	EARP and GARP complex-interacting protein 1 OS=Sus scrofa OX=9823 GN=EIPR1 PE=1 SV=1	0.985	0.864	0.914	0.939	0.988	0.801	1.046	0.805	0.712	1.107	1.091	0.898	0.934	0.996	0.993	1.003	1.044	0.836	1.115	1.045	1.016	0.85	0.89	1.111	0.938	1.021	1.564	9	9	9	0.843351	0.0560217	-0.245795	1.25164	0.932147	0.362951	-0.101371	0.440152
1297	A0A287B186	VAPB	VAMP associated protein B and C OS=Sus scrofa OX=9823 GN=VAPB PE=3 SV=1	0.901	0.852	0.83	0.877	1.129	0.613	0.951	1.044	0.914	1.039	0.858	0.886	1.018	0.676	0.853	0.898	0.941	1.012	0.823	0.849	0.836	0.729	1.44	1.22	0.854	0.912	1.314	9	9	9	0.903531	0.344179	-0.146354	0.463216	0.911329	0.362967	-0.133956	0.440133
1231	P68005	PYY	Peptide YY OS=Sus scrofa OX=9823 GN=PYY PE=1 SV=1	1.117	1.16	1.293	0.834	0.684	0.869	1.077	1.286	1.533	0.899	1.104	1.101	0.894	0.862	0.757	1.024	1.038	0.901	1.124	1.097	1.221	1.002	0.605	0.867	1.029	0.944	1.422	9	9	9	1.05821	0.612809	0.0816269	0.212675	0.921491	0.363071	-0.117958	0.440009
802	A0A287BPW9	SORBS1	Sorbin and SH3 domain containing 1 OS=Sus scrofa OX=9823 GN=SORBS1 PE=1 SV=2	0.822	0.861	0.94	1.011	1.087	0.811	0.969	0.983	0.936	0.922	1.062	0.971	1.006	1.428	0.974	0.888	1.141	1.018	0.86	1.086	0.957	0.735	0.599	1.074	0.987	0.874	1.43	9	9	9	0.978842	0.815655	-0.0308519	0.0884933	1.09393	0.363255	0.129523	0.439789
1412	Q9MYT8	ATP5ME	ATP synthase subunit e, mitochondrial OS=Sus scrofa OX=9823 GN=ATP5ME PE=1 SV=4	1.1	1.041	1.129	0.931	0.983	1.225	1.025	0.972	0.931	1.007	0.989	0.92	1.003	1.216	1.066	1.036	1.014	1.162	0.926	1.023	1.039	1.1	0.975	0.901	1.001	1.089	1.04	9	9	9	1.02672	0.508437	0.0380441	0.293763	1.03508	0.363482	0.0497396	0.439517
3065	A0A8W4F8E8	NCOR1	Nuclear receptor corepressor 1 OS=Sus scrofa OX=9823 GN=NCOR1 PE=3 SV=1	1.049	1.046	1.043	1.181	1.402	1.211	0.961	0.879	0.836	1.031	1.176	0.95	1.178	1.478	1.173	1.118	1.02	0.892	0.943	1.078	1.052	1.259	1.298	0.99	0.891	1.041	0.808	9	9	9	1.0265	0.732376	0.0377276	0.135266	1.07009	0.364993	0.097726	0.437715
1771	A0A287AYY7	LRRC47	Leucine rich repeat containing 47 OS=Sus scrofa OX=9823 GN=LRRC47 PE=1 SV=1	1.042	1.023	1.086	0.968	1.022	0.891	1.017	1.076	1.08	1.103	0.931	1.013	0.945	0.935	0.946	0.905	0.99	0.999	1.045	1.036	1.035	0.818	1.082	1.146	1.006	0.984	0.928	9	9	9	1.01377	0.716828	0.0197254	0.144585	0.965529	0.3653	-0.050609	0.437351
2423	A0A5G2QQ72	ERLIN2	Erlin OS=Sus scrofa OX=9823 GN=ERLIN2 PE=1 SV=1	1.017	1.018	1.027	1.106	1.133	1.23	1.053	0.858	0.931	1.208	0.933	1.068	1.07	1.132	1.08	1.002	0.801	0.732	1.078	1.049	1.173	1.036	1.054	1.131	0.906	1.003	1.083	9	9	9	0.985283	0.730994	-0.0213895	0.136086	0.948807	0.366462	-0.0758136	0.435971
2086	I3L920	CORO1C	Coronin OS=Sus scrofa OX=9823 GN=CORO1C PE=1 SV=2	1.028	1.155	1.264	1.122	1.143	1.19	1.1	1.228	1.1	1.079	0.947	1.082	1.009	0.978	0.996	0.829	1.021	1.02	1.284	1.123	0.944	0.965	1.212	0.996	1.104	0.979	0.816	9	9	9	1.09625	0.0884944	0.132582	1.05308	0.950971	0.367706	-0.0725267	0.4345
2832	I3LRY4	SMARCC2	SWI/SNF related, matrix associated, actin dependent regulator of chromatin subfamily c member 2 OS=Sus scrofa OX=9823 GN=SMARCC2 PE=1 SV=3	1.038	1.103	1.072	0.958	0.989	0.84	0.963	0.895	0.904	1.018	0.946	0.99	1.064	0.942	0.963	0.961	1.045	0.909	1.026	0.953	1.067	0.876	1.088	1.096	0.958	0.96	1.072	9	9	9	0.963281	0.350833	-0.053972	0.4549	0.971636	0.367854	-0.0415123	0.434325
75	A0A286ZIJ1	XPNPEP1	X-prolyl aminopeptidase 1 OS=Sus scrofa OX=9823 GN=XPNPEP1 PE=1 SV=1	1.132	1.219	1.196	0.949	1.223	1.211	1.066	1.053	1.107	1.105	1.048	0.958	1.161	1.164	1.02	0.956	1.051	0.964	1.096	1.022	0.981	0.965	1.117	0.951	1.028	0.98	1.008	9	9	9	1.11019	0.0091236	0.150804	2.03983	1.0305	0.368032	0.0433424	0.434115
2736	A0A4X1W928	CCT7	T-complex protein 1 subunit eta OS=Sus scrofa OX=9823 GN=CCT7 PE=1 SV=1	1.052	1.064	1.016	1.039	1.101	1.019	0.998	0.951	0.978	0.991	0.994	0.993	0.968	1.076	0.969	1.032	1.038	0.992	0.931	0.898	0.984	0.982	1.117	0.877	0.985	1.039	1.011	9	9	9	1.04465	0.151766	0.063021	0.818826	1.02595	0.368076	0.0369632	0.434062
1577	F1S396	NOB1	RNA-binding protein NOB1 OS=Sus scrofa OX=9823 GN=NOB1 PE=3 SV=3	1.03	1.112	1.238	1.009	1	0.855	0.98	1.144	1.001	1.039	0.957	0.93	1.16	0.724	0.948	0.882	1	0.903	0.902	1.024	1.042	0.999	1.058	1.144	1.046	0.897	0.852	9	9	9	1.04518	0.365366	0.0637524	0.437272	0.953034	0.36851	-0.0693999	0.43355
1505	A0A8W4FCQ5	H1-2	Histone H2B OS=Sus scrofa OX=9823 GN=H1-2 PE=3 SV=1	1.109	1.25	1.202	0.933	1.205	1.184	1.083	0.925	0.947	1.095	0.888	1.003	1.078	0.998	1.056	0.872	1.002	1.091	0.953	1.044	1.036	0.963	1.095	0.762	1.072	0.996	0.73	9	9	9	1.13721	0.0468205	0.185498	1.32956	1.04994	0.368633	0.070302	0.433406
771	A0A5G2QQW0	MCU	Calcium uniporter protein OS=Sus scrofa OX=9823 GN=MCU PE=1 SV=1	0.961	1.019	0.934	1.013	0.915	0.955	1.211	1.008	1.018	1.076	0.87	1.101	0.987	0.979	1.007	1.075	1.097	1.015	1.178	0.953	0.99	0.861	0.998	0.993	1.034	0.981	0.896	9	9	9	1.01688	0.694037	0.0241555	0.158617	1.03636	0.368863	0.0515218	0.433135
1980	D2SW95	COPB1	Coatomer subunit beta OS=Sus scrofa OX=9823 GN=COPB1 PE=2 SV=1	1.056	0.915	0.966	0.969	0.919	1.054	1.021	0.96	1.081	1.067	0.954	0.927	0.924	1.038	0.996	1.06	1	0.966	0.963	0.931	0.994	0.945	0.942	0.975	1.068	1.053	0.792	9	9	9	1.03209	0.372895	0.0455695	0.428413	1.03105	0.369023	0.0441165	0.432947
1083	F1SKE2	PLOD2	procollagen-lysine 5-dioxygenase OS=Sus scrofa OX=9823 GN=PLOD2 PE=1 SV=4	1.066	1.093	0.948	1.095	0.869	0.923	0.878	0.798	0.941	1.107	0.819	1.079	0.891	0.94	0.986	0.913	0.87	0.774	0.986	1.022	1.113	0.925	1.062	0.799	0.764	1.203	1.003	9	9	9	0.970035	0.622431	-0.0438914	0.205909	0.9439	0.369192	-0.0832941	0.432748
1360	B6EAV5	NHERF2	Na(+)/H(+) exchange regulatory cofactor NHE-RF OS=Sus scrofa OX=9823 GN=NHERF2 PE=1 SV=1	0.982	0.902	0.907	0.889	0.885	0.77	0.939	0.925	0.989	1.016	0.895	0.908	1.013	0.883	0.938	1.067	0.962	0.924	1.048	1.017	0.96	0.795	0.861	1.208	0.905	0.974	1.372	9	9	9	0.895842	0.12518	-0.158683	0.902464	0.941575	0.36923	-0.0868513	0.432703
1487	A0A287BB18	RAB3GAP2	RAB3 GTPase activating non-catalytic protein subunit 2 OS=Sus scrofa OX=9823 GN=RAB3GAP2 PE=1 SV=2	1.002	0.892	0.95	1.045	0.921	0.989	1.108	1.176	1.192	1.036	0.821	0.915	0.974	0.901	0.977	1.094	1.052	1.025	0.949	0.971	0.939	0.96	1.007	1.089	0.984	1.076	1.124	9	9	9	1.01934	0.653572	0.0276393	0.184707	0.96659	0.369675	-0.0490244	0.432179
1637	F1RKV7	CRLF3	Cytokine receptor like factor 3 OS=Sus scrofa OX=9823 GN=CRLF3 PE=1 SV=4	1.004	1.354	1.4	1.089	1.438	0.593	1.108	0.784	0.607	0.86	1.045	1.26	1.048	0.51	0.733	1.03	1.094	1.061	1.054	0.815	1.119	0.7	1.586	1.072	0.94	1.062	1.23	9	9	9	0.979014	0.873108	-0.030598	0.0589322	0.902172	0.369688	-0.148526	0.432165
1942	I3LR51	FKBP3	peptidylprolyl isomerase OS=Sus scrofa OX=9823 GN=FKBP3 PE=1 SV=2	1.093	0.993	1.039	1.046	0.967	1.111	1.069	1.067	1.047	1.08	0.866	0.937	0.988	0.955	0.967	1.032	1.083	0.992	0.97	1.03	0.967	0.916	1.049	1.128	0.967	1.026	1.126	9	9	9	1.02756	0.34464	0.0392267	0.462634	0.969605	0.369876	-0.0445317	0.431944
1600	A0A287B833	ATXN2	Ataxin 2 OS=Sus scrofa OX=9823 GN=ATXN2 PE=1 SV=1	1.081	0.891	1.043	0.858	0.903	0.797	0.865	0.782	0.787	0.902	0.969	0.945	0.956	1.047	0.92	0.917	0.879	1.015	1.063	0.82	1.005	1.079	1.031	0.735	0.849	0.776	0.774	9	9	9	0.984629	0.815674	-0.0223484	0.0884832	1.0514	0.370909	0.0723142	0.430733
606	I3LS86	KBTBD11	Kelch repeat and BTB domain containing 11 OS=Sus scrofa OX=9823 GN=KBTBD11 PE=1 SV=3	1.054	0.927	0.968	1.091	1.165	1.049	0.998	0.983	0.952	0.972	0.935	0.97	1.077	1.003	0.93	0.956	0.923	0.91	0.943	0.975	0.91	0.963	1.315	1.092	0.772	0.91	1.371	9	9	9	0.993082	0.921568	-0.0100155	0.0354724	0.937845	0.3717	-0.0925793	0.429808
548	F1S365	UROD	Uroporphyrinogen decarboxylase OS=Sus scrofa OX=9823 GN=UROD PE=1 SV=2	0.857	0.929	0.929	1.145	0.949	1.106	0.965	0.944	0.985	0.873	1.206	0.924	1.129	1.139	1.087	0.9	0.898	0.947	0.918	1.003	0.94	1.055	1.023	1.136	0.881	0.922	0.763	9	9	9	1.01944	0.697874	0.02778	0.156223	1.05347	0.371804	0.0751438	0.429686
3058	C3UP60	MAL2	MAL2 proteolipid protein OS=Sus scrofa OX=9823 GN=MAL2 PE=1 SV=1	1.033	1.077	0.958	1.128	1.045	1.126	0.991	1.077	1.183	1.018	0.93	0.952	0.97	1.042	0.997	1.088	1.052	1.019	1.016	0.915	1.037	0.88	1.171	1.209	1.025	1.078	1.064	9	9	9	1.02374	0.568773	0.0338438	0.245061	0.965194	0.372028	-0.0511088	0.429424
163	Q29290	CSTB	Cystatin-B OS=Sus scrofa OX=9823 GN=CSTB PE=1 SV=1	0.996	0.926	0.933	1.178	0.988	1.164	0.839	1.104	0.844	1.006	0.894	0.939	0.992	1.07	1.133	0.873	0.906	0.806	1.02	0.98	0.93	0.817	0.818	0.935	0.849	0.743	1.104	9	9	9	1.09468	0.150205	0.13051	0.823315	1.05161	0.372118	0.0726005	0.429319
1290	F1RZP9	MICAL1	Molecule interacting with CasL protein 1 OS=Sus scrofa OX=9823 GN=MICAL1 PE=1 SV=3	1.023	1.045	0.989	1.048	0.944	0.948	0.995	1.086	1.041	1.057	0.945	0.984	0.969	0.888	0.931	1.008	1.056	0.989	1.04	0.997	0.997	0.903	0.928	1.076	0.913	1.022	1.401	9	9	9	0.982969	0.746631	-0.0247827	0.126894	0.951493	0.372874	-0.0717351	0.428438
1560	A0A5G2QHC8	UBE2V2	Ubiquitin-conjugating enzyme E2 variant 2 OS=Sus scrofa OX=9823 GN=UBE2V2 PE=1 SV=2	1.057	1.173	1.159	0.912	1.003	0.936	1.091	0.876	0.821	1.105	0.975	1.007	1.035	0.993	0.998	0.918	0.992	1.026	1.003	0.983	1.064	0.951	0.983	0.829	1.005	1.066	0.92	9	9	9	1.02544	0.615894	0.0362473	0.210494	1.02783	0.372875	0.0395992	0.428436
2051	A0A287BMA8	WDR46	WD repeat domain 46 OS=Sus scrofa OX=9823 GN=WDR46 PE=4 SV=2	1.168	1.164	1.007	1.079	1.077	0.932	1.081	1.074	1.11	1.008	0.983	0.986	1.085	0.992	1.054	1.015	1.065	0.962	0.998	1.055	1.032	0.95	1.007	0.986	1.098	1.052	1.221	9	9	9	1.03117	0.378921	0.0442871	0.421451	0.973508	0.37292	-0.0387355	0.428384
2414	A0A5G2QLE8	TTLL12	Tubulin tyrosine ligase like 12 OS=Sus scrofa OX=9823 GN=TTLL12 PE=1 SV=1	0.986	0.936	0.937	1.051	1.013	1.121	1.064	1.059	1.192	1.018	0.919	0.933	0.917	1.021	1.073	1.004	0.98	0.937	0.932	1.045	0.968	0.956	1.014	1.115	1.018	1.022	0.95	9	9	9	1.03758	0.283178	0.053227	0.54794	0.975831	0.373335	-0.0352961	0.427901
2672	A0A287AJX7	HNRNPL	Heterogeneous nuclear ribonucleoprotein L OS=Sus scrofa OX=9823 GN=HNRNPL PE=1 SV=3	1.114	1.137	1.21	0.993	1.17	0.801	1.123	1.186	1.065	0.967	1.169	1.084	1.046	0.854	0.931	0.902	0.917	1.029	1.156	0.973	1.179	0.996	1.127	0.96	0.936	0.908	1.055	9	9	9	1.05479	0.309673	0.0769559	0.509096	0.957912	0.373598	-0.0620354	0.427595
691	A0A287BHE7	RPS14	Small ribosomal subunit protein uS11 OS=Sus scrofa OX=9823 GN=RPS14 PE=3 SV=1	1.086	0.971	1.005	1.057	0.931	0.94	1.031	0.914	0.935	1.094	0.939	0.917	0.961	0.963	0.997	0.956	1.008	0.879	1.064	1.002	1.006	0.918	0.881	1.052	0.947	0.928	1.307	9	9	9	0.97419	0.589383	-0.0377249	0.229602	0.957057	0.373659	-0.0633239	0.427524
1741	A0A5G2R274	AKR1B1	Aldo-keto reductase family 1 member B1 OS=Sus scrofa OX=9823 GN=AKR1B1 PE=3 SV=2	0.982	1.104	1.148	1.106	1.131	1.211	1.052	0.998	0.969	0.945	0.814	0.943	0.946	0.954	0.964	0.79	0.969	0.913	0.905	1.024	0.898	0.975	1.182	0.754	1.05	0.998	0.845	9	9	9	1.12397	0.032635	0.168606	1.48632	0.954466	0.373709	-0.0672336	0.427467
2071	F1SIP0	SEPTIN2	Septin OS=Sus scrofa OX=9823 GN=SEPTIN2 PE=1 SV=3	1.034	1.03	0.952	1.018	1.052	1.157	0.941	0.908	0.932	0.998	0.954	1.012	1.088	1.006	1.032	0.985	0.982	1.026	0.908	0.802	0.95	0.896	0.911	1.105	0.934	1.004	1.213	9	9	9	1.03451	0.502525	0.0489427	0.298842	1.04127	0.37448	0.0583445	0.426571
380	A0A5G2R1L5	MYO1F	Myosin IF OS=Sus scrofa OX=9823 GN=MYO1F PE=3 SV=2	1.092	1.104	1.117	1.041	0.947	0.68	1.077	1.039	1.174	0.982	1.03	1.059	0.932	0.74	0.87	1.048	1.037	1.011	1.02	0.987	1.113	0.836	1.032	1.047	1.026	1.003	0.998	9	9	9	1.02306	0.677163	0.0328955	0.169307	0.961046	0.374669	-0.0573224	0.426352
1248	A0A8W4FFC9	SDE2	Replication stress response regulator SDE2 OS=Sus scrofa OX=9823 GN=SDE2 PE=3 SV=1	1.164	1.167	0.994	1.258	1.102	0.774	1.113	0.968	0.937	1.088	0.909	1	1.174	0.939	0.984	0.984	1.177	1.146	1.015	0.891	1.074	0.986	1.349	1.351	0.96	1.006	1.365	9	9	9	0.947984	0.481995	-0.0770648	0.316957	0.940382	0.374834	-0.088681	0.426161
1750	A0A4X1T4G7	AHSA1	Activator of HSP90 ATPase activity 1 OS=Sus scrofa OX=9823 GN=AHSA1 PE=1 SV=1	0.997	0.954	0.936	0.869	0.874	0.735	0.988	0.813	0.772	0.971	0.821	0.942	0.897	0.789	0.861	0.729	0.952	0.861	0.936	0.979	0.971	0.93	0.992	0.712	0.847	0.927	0.855	9	9	9	0.974107	0.594138	-0.0378475	0.226113	0.959995	0.377142	-0.0589011	0.423495
1262	Q684M6	CDC37	Hsp90 co-chaperone Cdc37 OS=Sus scrofa OX=9823 GN=CDC37 PE=1 SV=1	0.986	0.996	0.973	0.917	0.973	1.086	1.074	0.979	1.006	0.966	0.943	0.862	0.934	1.004	0.951	1.062	1.024	0.992	0.915	1.095	0.901	0.913	1.023	0.924	1.113	1.062	1.083	9	9	9	0.995681	0.901709	-0.0062451	0.0449337	0.967771	0.377222	-0.0472631	0.423403
2599	F1RK02	LCP1	Lymphocyte cytosolic protein 1 OS=Sus scrofa OX=9823 GN=LCP1 PE=1 SV=4	1.181	0.927	0.936	0.984	1.024	1.085	1.085	1.027	1.024	1.109	0.91	0.98	0.96	0.959	1.019	1	1.043	1.008	1.032	0.928	0.939	0.939	1.001	0.874	1.005	1.014	1.038	9	9	9	1.05735	0.106378	0.0804593	0.97315	1.02486	0.377338	0.0354233	0.423269
983	O11780	TGFBI	Transforming growth factor-beta-induced protein ig-h3 OS=Sus scrofa OX=9823 GN=TGFBI PE=1 SV=1	0.952	1.01	1.082	0.966	0.936	0.804	0.966	0.999	0.953	0.967	0.923	0.993	1.081	1.055	0.927	1.01	0.977	1.062	1.048	0.91	1.105	1.017	1.001	0.833	0.958	1.02	0.768	9	9	9	1.00092	0.984006	0.00133213	0.00700205	1.03868	0.377997	0.0547563	0.422511
1675	F1SAE9	LAMB1	Laminin subunit beta 1 OS=Sus scrofa OX=9823 GN=LAMB1 PE=1 SV=4	0.978	0.931	0.98	0.967	0.935	1.018	0.969	0.985	1.092	1.019	0.897	0.908	0.983	1.117	1.066	1.032	1.089	1.018	0.978	1.078	0.985	0.813	0.877	1.07	1.002	0.984	1.031	9	9	9	1.0042	0.902531	0.00604083	0.0445381	1.03527	0.378131	0.0500054	0.422358
1984	F1RWL7	NDUFB8	NADH dehydrogenase [ubiquinone] 1 beta subcomplex subunit 8, mitochondrial OS=Sus scrofa OX=9823 GN=NDUFB8 PE=1 SV=1	0.898	0.917	1.026	1.482	1.093	0.841	1.018	0.982	1.034	1.088	0.942	0.981	1.196	0.72	0.94	1.11	1.091	0.876	0.95	1.078	0.985	0.729	1.06	1.811	1.063	1.049	1.115	9	9	9	0.944207	0.606106	-0.0828244	0.217452	0.908943	0.378601	-0.137738	0.421819
1532	I3LKW5	RBM22	Pre-mRNA-splicing factor RBM22 OS=Sus scrofa OX=9823 GN=RBM22 PE=1 SV=3	1.078	1.091	1.105	1.134	1.169	1.043	0.995	1.041	1.252	0.928	0.961	0.997	1.105	0.943	1.028	0.984	1.157	0.981	0.974	0.913	1.002	0.849	1.25	1.185	1.027	0.855	2.354	9	9	9	0.951869	0.734106	-0.0711657	0.134241	0.872706	0.378791	-0.196432	0.4216
201	F1S596	PRKCSH	Glucosidase 2 subunit beta OS=Sus scrofa OX=9823 GN=PRKCSH PE=1 SV=1	1.058	0.861	0.875	0.964	0.961	1.039	1.027	0.81	0.963	1.121	1.059	0.928	0.967	1.151	1.041	1.113	1.008	0.923	1.016	0.98	1.044	1.01	0.803	0.999	0.998	1.06	1.084	9	9	9	0.951523	0.235758	-0.0716892	0.627534	1.03525	0.378894	0.0499732	0.421483
390	A0A5G2R7P3	LTBP2	Latent transforming growth factor beta binding protein 2 OS=Sus scrofa OX=9823 GN=LTBP2 PE=1 SV=1	1.042	1.182	1.053	1.002	1.052	0.771	1.069	0.741	0.662	1.021	1.082	0.931	1.084	0.966	0.931	0.849	0.971	0.907	1.108	1.022	1.033	0.97	1.05	1.245	0.851	0.739	1.216	9	9	9	0.928525	0.375864	-0.106987	0.424969	0.946719	0.379085	-0.0789924	0.421263
1561	A0A287BK32	VPS36	Vacuolar protein-sorting-associated protein 36 OS=Sus scrofa OX=9823 GN=VPS36 PE=1 SV=2	1.134	1.028	0.966	1.018	0.806	0.905	1.08	1.112	1.126	1.077	0.897	0.901	0.977	0.863	0.964	1.097	0.997	1.002	1.045	1.053	1.02	0.819	0.988	1.109	1.096	0.841	1.205	9	9	9	0.999891	0.998426	-0.000157233	0.000683968	0.956299	0.380264	-0.0644663	0.419915
902	F2Z5L2	H2AC18	Histone H2A OS=Sus scrofa OX=9823 GN=H2AC18 PE=3 SV=1	1.093	1.159	1.125	1.163	0.841	0.773	1.091	1.222	1.301	1.119	0.937	0.992	0.827	0.398	0.761	0.986	0.996	1.094	0.908	0.984	0.914	1.029	0.982	1.09	0.916	0.932	0.987	9	9	9	1.11736	0.0898822	0.1601	1.04633	0.927705	0.380491	-0.108261	0.419656
2095	A0A287B773	MCCC2	methylcrotonoyl-CoA carboxylase OS=Sus scrofa OX=9823 GN=MCCC2 PE=1 SV=2	1.17	1.023	0.978	0.988	1.073	1.125	0.956	0.913	0.729	1.24	1.002	1.031	1.075	1.127	1.198	0.855	1.114	0.856	1.138	1.091	1.267	0.909	0.832	1.093	0.71	0.916	0.949	9	9	9	1.00561	0.939282	0.00807782	0.027204	1.06659	0.380588	0.0930081	0.419544
2976	A0A286ZU93	CDH17	Cadherin-17 OS=Sus scrofa OX=9823 GN=CDH17 PE=1 SV=2	1.163	0.906	0.895	0.85	0.932	0.958	0.983	0.937	0.908	0.999	1.139	0.928	1.047	0.891	0.901	1.002	0.907	0.911	1.035	1.023	1.153	0.846	0.977	1.021	0.989	0.99	1.003	9	9	9	0.944119	0.177256	-0.08296	0.7514	0.965475	0.3808	-0.0506888	0.419303
1264	A0A287BKF7	H3C1	H3 clustered histone 1 OS=Sus scrofa OX=9823 GN=H3C1 PE=3 SV=3	1.046	1.147	1.061	1.01	1.005	0.919	1.072	1.19	0.993	1.085	0.816	1.048	1.057	0.804	0.837	0.794	0.974	0.987	0.987	0.925	1.007	1.132	1.272	0.928	0.862	1.006	0.789	9	9	9	1.06006	0.300887	0.0841437	0.521597	0.943197	0.381296	-0.0843688	0.418738
574	A0A8X9AEQ6	ARPC5	Actin-related protein 2/3 complex subunit 5 OS=Sus scrofa OX=9823 GN=ARPC5 PE=1 SV=1	1.091	1.127	1.114	0.996	0.958	1.026	1.095	1.067	1.075	1.072	1.063	1.084	1.081	1.037	0.972	0.958	0.976	1.138	1.082	0.946	1.192	1.058	1.014	0.733	1.02	1.048	0.896	9	9	9	1.0623	0.214347	0.087189	0.668883	1.04361	0.381775	0.0615811	0.418193
1702	A0A287AR56	QSOX2	Sulfhydryl oxidase OS=Sus scrofa OX=9823 GN=QSOX2 PE=3 SV=2	1.036	1.061	1.037	1.029	1.114	1.057	1.005	0.995	1.031	1.023	0.945	0.959	0.954	1.022	0.969	1.02	1.027	0.981	0.913	0.972	1.042	0.991	1.177	1.064	0.913	0.995	1.083	9	9	9	1.0235	0.451618	0.0335073	0.345229	0.972678	0.382213	-0.0399664	0.417694
863	A0A8W4FAI7	FNDC1	Fibronectin type III domain containing 1 OS=Sus scrofa OX=9823 GN=FNDC1 PE=4 SV=1	0.791	1.292	0.808	1.326	0.958	0.449	0.826	1.149	1.071	0.791	2.247	0.935	0.979	0.526	0.918	0.709	0.83	0.795	1.126	1.233	0.949	0.677	0.78	1.391	0.837	0.718	5.003	9	9	9	0.681925	0.360532	-0.552314	0.443056	0.686645	0.382996	-0.542364	0.416806
658	F1RWX5	WRNIP1	ATPase WRNIP1 isoform 1 OS=Sus scrofa OX=9823 GN=WRNIP1 PE=1 SV=2	1.102	0.989	1.015	1.068	0.998	0.967	1.082	0.965	1.044	1.018	0.92	0.964	0.895	0.928	0.927	1.207	1.03	0.975	1.196	1.035	0.962	0.852	1.03	1.001	0.984	0.925	1.373	9	9	9	0.986322	0.800181	-0.0198696	0.0968116	0.947211	0.383152	-0.0782423	0.416629
1722	A0A287B0F4	LOC106507512	KASH5-like coiled-coil domain-containing protein OS=Sus scrofa OX=9823 GN=LOC106507512 PE=4 SV=1	1.008	1.13	1.083	1.032	0.97	0.943	1.116	0.916	0.903	1.114	0.769	0.935	0.976	0.944	1.055	0.895	1.064	0.855	0.912	1.06	0.91	1.036	1.154	0.96	0.858	1.035	1.073	9	9	9	1.01145	0.791619	0.0164207	0.101484	0.956546	0.383522	-0.0640939	0.416209
1922	A0A5K1UKC5	BGN	Biglycan OS=Sus scrofa OX=9823 GN=BGN PE=1 SV=2	0.955	0.994	0.972	1.291	0.978	0.934	0.958	1.005	1.061	0.979	1.051	0.946	0.995	1.054	1.151	1.186	0.906	1.01	1.024	0.945	1.028	1.12	0.958	0.834	1.072	1.079	0.854	9	9	9	1.02625	0.6057	0.0373834	0.217742	1.04083	0.383593	0.0577409	0.416129
1357	A0A5G2R836	ITGA1	Integrin subunit alpha 1 OS=Sus scrofa OX=9823 GN=ITGA1 PE=1 SV=1	0.943	0.966	0.977	0.836	0.92	0.874	0.954	1.127	1.145	0.915	0.921	0.972	1.006	0.951	0.939	0.958	1.018	0.963	1.186	1.058	0.902	1.041	0.791	0.898	0.979	0.947	1.253	9	9	9	0.965433	0.568904	-0.0507513	0.244961	0.9545	0.383958	-0.0671825	0.415717
1736	A0A286ZUS4	CHCHD3	Coiled-coil-helix-coiled-coil-helix domain containing 3 OS=Sus scrofa OX=9823 GN=CHCHD3 PE=1 SV=1	1.072	0.945	0.893	0.888	0.904	0.8	1.018	0.782	0.777	0.991	0.857	0.947	1.068	0.873	0.849	0.932	1.001	0.904	0.903	1.05	1.032	0.922	0.877	0.886	0.961	1.024	1.043	9	9	9	0.928834	0.121592	-0.106507	0.915094	0.968269	0.384166	-0.0465208	0.415481
110	A0A5S8KY97	EIF4A3	Eukaryotic initiation factor 4A-III OS=Sus scrofa OX=9823 GN=EIF4A3 PE=1 SV=1	1.024	0.939	0.924	0.998	0.97	1.001	0.989	0.848	0.847	0.979	0.894	0.953	1.005	1.015	0.985	0.972	0.975	0.946	0.919	0.952	1.001	1.036	1.151	0.976	0.961	0.991	0.946	9	9	9	0.956006	0.185362	-0.0649087	0.731978	0.976604	0.385002	-0.034155	0.414537
1284	P00355	GAPDH	Glyceraldehyde-3-phosphate dehydrogenase OS=Sus scrofa OX=9823 GN=GAPDH PE=1 SV=4	0.98	0.976	1.061	0.959	1.009	1.023	1.057	1.045	0.996	1.007	1.027	1.089	0.965	0.97	1.009	0.943	0.987	1.003	1.032	0.892	1.005	1.059	1.025	0.829	1.108	0.928	0.818	9	9	9	1.04715	0.242344	0.0664655	0.615569	1.03496	0.385106	0.0495731	0.41442
2703	F1RQP1	TRMT112	Multifunctional methyltransferase subunit TRM112-like protein OS=Sus scrofa OX=9823 GN=TRMT112 PE=1 SV=2	0.855	0.877	0.828	0.866	0.838	1.017	1.011	1.036	1.065	0.852	0.792	0.77	0.939	0.964	0.886	1.039	0.968	0.973	0.886	1.087	0.854	0.846	0.942	0.822	0.973	1.01	1.154	9	9	9	0.97889	0.692955	-0.0307818	0.159295	0.954397	0.385539	-0.0673386	0.413931
2845	I3LJ73	GMPS	GMP synthase (glutamine-hydrolyzing) OS=Sus scrofa OX=9823 GN=GMPS PE=1 SV=2	0.988	1.051	1.103	1.049	1.045	1.01	1.073	1.192	1.21	1.012	0.81	0.907	1.015	0.92	1.106	0.94	0.993	0.967	0.967	0.944	1.019	1.028	1.071	1.106	0.959	0.931	0.927	9	9	9	1.0859	0.0208704	0.118895	1.68047	0.968499	0.385681	-0.046178	0.413772
1574	A0A4X1W2Z0	DPH2	2-(3-amino-3-carboxypropyl)histidine synthase subunit 2 OS=Sus scrofa OX=9823 GN=DPH2 PE=3 SV=1	0.65	0.863	0.94	1.293	1.001	0.974	1.229	1.29	1.455	0.945	1.061	0.797	1.061	1.079	1.211	0.858	0.862	0.993	1.044	1.063	0.967	1.047	1.061	1.073	1	0.835	1.227	9	9	9	1.04057	0.656662	0.0573754	0.182658	0.951701	0.385683	-0.0714194	0.41377
2809	F1SD98	TRMT1	tRNA (guanine(26)-N(2))-dimethyltransferase OS=Sus scrofa OX=9823 GN=TRMT1 PE=3 SV=4	1.008	1.099	1.031	1.04	1.019	1.1	1.026	1.128	1.112	1.021	0.806	0.895	0.93	1.013	1.043	0.891	0.972	0.937	0.945	0.967	0.923	0.929	1.044	0.969	0.95	0.93	1.117	9	9	9	1.08992	0.00496777	0.124229	2.30384	0.969683	0.386242	-0.0444147	0.413141
671	A0A480YT82	ACOX1	Acyl-coenzyme A oxidase OS=Sus scrofa OX=9823 GN=ACOX1 PE=1 SV=1	1.258	0.969	1.145	1.028	1.04	1.065	1.104	1.171	1.171	1.102	0.894	1.077	1.08	0.998	1.061	0.937	1.051	1.016	0.769	0.841	0.992	1.006	1.142	1.021	0.978	1.041	1.067	9	9	9	1.12352	0.0234877	0.168023	1.62916	1.04053	0.386768	0.0573226	0.412549
2129	A0A287BK50	NCDN	Neurochondrin OS=Sus scrofa OX=9823 GN=NCDN PE=3 SV=2	0.931	0.941	0.978	1.169	1.178	0.91	1.012	0.892	0.97	0.965	0.913	0.936	1.156	1	1.15	0.884	0.984	0.914	0.945	1.056	0.893	0.999	1.125	1.43	0.872	0.95	1.174	9	9	9	0.950974	0.4641	-0.0725219	0.333388	0.942609	0.386845	-0.0852685	0.412463
1063	A0A287B5D6	ANKFY1	Ankyrin repeat and FYVE domain containing 1 OS=Sus scrofa OX=9823 GN=ANKFY1 PE=1 SV=3	0.944	0.876	0.854	1.128	1.001	1.085	0.872	1.072	1.03	1.018	0.91	0.856	0.992	1.039	1.084	0.945	0.891	0.87	0.835	1.073	0.902	0.903	1.007	1.353	0.922	0.918	1.195	9	9	9	0.972991	0.683469	-0.039502	0.165281	0.944774	0.38687	-0.0819591	0.412435
583	A0A8W4FDT6	CCDC12	Coiled-coil domain containing 12 OS=Sus scrofa OX=9823 GN=CCDC12 PE=4 SV=1	1.147	0.984	1.036	1.539	1.421	1.35	1.016	0.904	1	1.117	0.773	1.065	1.317	1.212	1.281	1.089	1.019	0.86	0.925	1.01	1.05	1.364	1.615	1.649	0.936	1.001	1.09	9	9	9	0.977162	0.826838	-0.0333308	0.0825798	0.914756	0.387101	-0.128542	0.412175
2087	F1S087	DYNC1I2	Cytoplasmic dynein 1 intermediate chain 2 OS=Sus scrofa OX=9823 GN=DYNC1I2 PE=1 SV=4	1.015	0.985	1.068	0.8	0.985	0.887	1.135	1.056	1.108	1.005	0.956	0.964	1.105	0.936	0.912	1.001	1.056	1.016	0.966	1.012	1.06	0.956	1.11	0.935	1.038	0.982	1.141	9	9	9	0.9825	0.681658	-0.0254707	0.166433	0.972935	0.387106	-0.039585	0.41217
2559	A0A5G2RDZ5	DRG2	Developmentally regulated GTP binding protein 2 OS=Sus scrofa OX=9823 GN=DRG2 PE=4 SV=1	0.876	1.013	0.847	1.001	0.887	0.948	0.962	0.996	1.147	0.975	0.71	0.723	0.964	0.81	0.836	1.017	0.965	0.926	0.764	0.882	0.899	0.792	0.968	1.038	0.956	1.011	1.019	9	9	9	1.04178	0.399876	0.059053	0.398075	0.951615	0.387262	-0.0715503	0.411995
2464	A0A5G2R4F4	ASL	Argininosuccinate lyase OS=Sus scrofa OX=9823 GN=ASL PE=1 SV=1	1.002	0.978	0.992	0.965	1.082	0.96	1.025	1.085	1.152	0.99	0.917	0.911	1.18	0.916	1.056	1.082	1.062	0.902	0.939	1.098	1	0.866	1.176	1.238	0.996	1.078	1.029	9	9	9	0.980998	0.66051	-0.0276781	0.180121	0.957113	0.387885	-0.0632395	0.411297
869	A0A5G2QRI8	PRMT5	Protein arginine N-methyltransferase 5 OS=Sus scrofa OX=9823 GN=PRMT5 PE=1 SV=2	1.114	0.996	0.939	1.072	0.966	0.924	1.059	1.002	1.038	1.054	0.882	0.939	1.084	0.911	1.023	0.836	1.037	0.991	0.983	0.996	0.968	0.993	1.12	1.15	0.959	0.968	0.924	9	9	9	1.00541	0.871389	0.00778077	0.0597881	0.96645	0.387901	-0.0492336	0.411279
2033	A0A5G2QSE4	CARS2	cysteine--tRNA ligase OS=Sus scrofa OX=9823 GN=CARS2 PE=1 SV=1	0.957	1.061	0.97	0.944	0.862	0.964	0.965	0.931	1.001	0.936	0.964	0.885	0.887	0.991	0.916	0.931	0.986	0.909	0.957	1.016	0.962	0.806	0.904	1.097	0.979	0.906	1.028	9	9	9	1	1	0	0	0.971115	0.388432	-0.042286	0.410685
1787	F1RU31	SART1	Spliceosome associated factor 1, recruiter of U4/U6.U5 tri-snRNP OS=Sus scrofa OX=9823 GN=SART1 PE=1 SV=1	1.037	0.986	0.914	1.101	0.898	0.865	1.033	0.909	0.858	1.024	0.921	0.949	1.137	1.085	0.862	0.927	1.03	0.947	0.952	1.023	0.961	1.006	0.924	1.167	0.953	1.009	1.275	9	9	9	0.927832	0.144431	-0.108065	0.84034	0.958145	0.388799	-0.0616848	0.410274
2806	A0A287B883	PTMS	Parathymosin OS=Sus scrofa OX=9823 GN=PTMS PE=1 SV=2	1.066	1.041	0.942	0.98	1.175	0.813	1.132	0.818	0.842	0.983	1.116	1.033	1.21	1.209	0.965	0.964	0.992	1.069	1.034	0.936	1.011	1.103	0.826	1.035	1.1	0.965	1.158	9	9	9	0.960842	0.488904	-0.0576288	0.310776	1.04068	0.389383	0.0575334	0.409623
186	F1S814	PGM1	Phosphoglucomutase-1 OS=Sus scrofa OX=9823 GN=PGM1 PE=1 SV=5	0.964	0.964	1.038	0.946	0.942	0.977	1.063	0.917	0.977	0.985	0.959	0.956	0.966	1.019	1.017	0.974	1.024	0.984	1.02	1.002	0.996	0.828	0.926	0.932	1.089	0.969	0.906	9	9	9	1.01384	0.658964	0.0198357	0.181139	1.02492	0.389527	0.0355102	0.409462
2000	A0A5G2QX76	PLSCR1	Phospholipid scramblase OS=Sus scrofa OX=9823 GN=PLSCR1 PE=1 SV=1	0.959	0.832	0.807	0.866	0.795	0.935	1.054	1.171	1.233	0.979	0.948	0.711	0.801	0.767	0.834	1.155	1.04	1.059	0.965	0.948	1.147	0.641	0.717	1.114	1.078	1.127	1.219	9	9	9	0.966056	0.697022	-0.0498209	0.156753	0.926083	0.39111	-0.110786	0.407701
2522	F1RSY4	SMPD2	sphingomyelin phosphodiesterase OS=Sus scrofa OX=9823 GN=SMPD2 PE=1 SV=2	1.161	0.952	0.859	0.942	0.822	0.995	1.161	1.032	1.175	1.086	0.889	0.946	0.903	0.989	0.867	1.077	0.86	1.083	0.821	0.972	1.103	0.814	1.019	1.012	1.131	1.098	1.146	9	9	9	0.998135	0.975538	-0.00269293	0.0107558	0.954366	0.391347	-0.0673855	0.407438
2361	Q6R2V0	WNK1	Serine/threonine-protein kinase WNK1 OS=Sus scrofa OX=9823 GN=WNK1 PE=2 SV=3	1.197	1.263	1.174	1.184	1.14	0.943	1.144	1.255	1.311	0.929	0.947	0.977	1.063	0.961	1.005	1.029	1.034	0.918	1.008	1.038	0.996	0.842	0.87	1.167	0.957	1.048	1.427	9	9	9	1.1345	0.0602563	0.18206	1.22	0.94761	0.391567	-0.0776341	0.407194
1233	I3LNI2	TFG	Trafficking from ER to golgi regulator OS=Sus scrofa OX=9823 GN=TFG PE=1 SV=4	1.067	1.028	1.028	0.883	1.106	1.088	1.031	1.14	1.102	1.022	0.973	0.983	1.03	1.096	0.956	1.055	1.058	1.083	0.994	0.939	1.048	1.145	0.979	0.806	1.065	1.006	0.993	9	9	9	1.05549	0.184682	0.0779094	0.733574	1.03131	0.391603	0.0444769	0.407154
2521	I3LTK3	LOC100513863	Ig-like domain-containing protein OS=Sus scrofa OX=9823 GN=LOC100513863 PE=3 SV=2	0.908	0.895	0.813	1.194	1.113	0.752	1.011	1.055	1.239	0.967	1.202	0.918	0.939	1.024	1.065	0.572	0.821	0.689	1.007	0.878	0.948	0.877	1.249	0.991	0.845	0.764	1.362	9	9	9	1.00661	0.940147	0.00951001	0.0268041	0.918843	0.392152	-0.122109	0.406546
904	F1SIH8	VCP	Transitional endoplasmic reticulum ATPase OS=Sus scrofa OX=9823 GN=VCP PE=1 SV=3	1.121	1.032	1.011	0.975	0.93	0.976	1.021	1.017	1.027	0.962	0.923	0.908	0.952	0.885	0.952	0.947	0.966	0.979	0.984	0.944	0.956	0.848	0.978	1.042	0.997	0.907	0.988	9	9	9	1.05391	0.0607767	0.075752	1.21626	0.980333	0.392726	-0.0286559	0.40591
433	F1SAF0	DLD	Dihydrolipoyl dehydrogenase OS=Sus scrofa OX=9823 GN=DLD PE=1 SV=1	1.075	1.016	1.05	0.994	1.002	1.109	1.08	1.027	1.038	1.053	1.009	0.93	1.14	1.043	1.004	1.046	1.015	0.987	1.009	0.988	1.026	0.972	1.065	0.951	1.061	0.958	1.011	9	9	9	1.03871	0.0559628	0.0547964	1.2521	1.02057	0.393456	0.0293793	0.405104
2902	F1RSY9	CDC40	Cell division cycle 40 OS=Sus scrofa OX=9823 GN=CDC40 PE=4 SV=1	1.1	0.91	0.892	0.785	0.813	0.813	1.034	1.168	1.052	0.973	0.945	0.86	0.826	0.839	0.94	1.033	0.932	0.838	0.911	1.067	1.084	0.85	0.698	0.796	1.059	1.033	1.132	9	9	9	0.9927	0.919989	-0.0105705	0.0362173	0.948552	0.393631	-0.0762019	0.40491
617	A0A287AGR3	SORBS1	Sorbin and SH3 domain containing 1 OS=Sus scrofa OX=9823 GN=SORBS1 PE=1 SV=3	0.711	1.001	1.012	0.825	1.4	0.853	1.012	0.871	0.848	0.886	1.052	0.882	1.777	1.03	1.201	0.793	1.193	1.151	0.969	1.204	0.857	0.742	0.759	1.028	1.043	0.88	1.496	9	9	9	0.950434	0.637552	-0.073341	0.195484	1.10994	0.393742	0.150476	0.404788
2632	F1RF72	VPS13D	Vacuolar protein sorting 13 homolog D OS=Sus scrofa OX=9823 GN=VPS13D PE=3 SV=4	1.044	1.235	1.103	0.861	0.911	0.922	0.957	0.996	0.889	0.984	1.109	1.084	0.833	0.761	1.039	1.191	1.107	0.97	1.133	0.97	1.041	0.968	0.829	0.9	0.879	1.115	0.744	9	9	9	1.03952	0.530786	0.0559107	0.275081	1.05817	0.393804	0.081565	0.40472
1825	F1SV29	UTP11	U3 small nucleolar RNA-associated protein 11 OS=Sus scrofa OX=9823 GN=UTP11 PE=3 SV=1	0.957	0.955	1.07	1.026	1.174	0.945	1.153	0.963	1.162	0.914	0.791	0.802	1.3	1.37	1.134	1.222	1.189	0.789	0.974	1.115	0.831	0.73	0.675	0.951	1.268	1.202	0.954	9	9	9	1.08103	0.316986	0.112413	0.49896	1.09322	0.394823	0.128582	0.403597
577	A0A5G2QAP4	VTA1	Vesicle trafficking 1 OS=Sus scrofa OX=9823 GN=VTA1 PE=1 SV=1	1.112	0.897	0.986	1.03	0.942	0.966	0.932	0.886	0.964	1.062	0.903	0.93	1.007	0.878	1.025	1.014	0.973	0.886	0.894	0.956	0.962	0.802	0.979	1.398	0.899	1.035	1.312	9	9	9	0.943488	0.427474	-0.0839237	0.36909	0.939483	0.395185	-0.0900618	0.403199
324	F1RMW4	XRCC1	X-ray repair cross complementing 1 OS=Sus scrofa OX=9823 GN=XRCC1 PE=1 SV=3	1.143	1.052	0.971	0.979	0.924	0.899	1.009	0.553	0.533	1.227	1.115	1.152	0.984	0.914	0.967	1.158	0.981	0.873	1.097	1.033	1.098	0.961	1.213	1.156	0.999	1.142	1.06	9	9	9	0.826212	0.0314475	-0.275417	1.50241	0.960242	0.395445	-0.0585303	0.402914
1436	F1SD78	MRI1	Methylthioribose-1-phosphate isomerase OS=Sus scrofa OX=9823 GN=MRI1 PE=1 SV=2	1.079	1.095	1.012	1.023	0.938	0.934	0.929	0.924	0.879	0.947	1.007	1.038	1.004	0.877	0.932	0.984	1.029	1.008	1.027	0.994	0.963	0.873	0.888	1.138	1.034	1	1.248	9	9	9	0.961593	0.414035	-0.0565017	0.382963	0.963011	0.39659	-0.0543751	0.401659
2935	A0A287AMT0	VWA8	von Willebrand factor A domain containing 8 OS=Sus scrofa OX=9823 GN=VWA8 PE=1 SV=1	0.874	0.841	0.882	1.032	0.887	0.802	1.069	0.85	0.912	0.956	0.892	0.867	1.02	0.925	0.967	1.009	1.008	0.904	0.902	1.156	0.914	0.727	0.901	1.167	1.116	0.998	1.085	9	9	9	0.908878	0.137231	-0.137841	0.862547	0.953379	0.397438	-0.0688776	0.400731
160	F1S7J3	RBCK1	RanBP-type and C3HC4-type zinc finger-containing protein 1 OS=Sus scrofa OX=9823 GN=RBCK1 PE=3 SV=3	1.002	0.891	0.857	0.934	0.86	0.961	1.038	0.913	0.93	1.003	0.942	0.88	0.952	0.993	0.968	0.958	1.016	0.831	0.969	0.907	1.004	0.992	0.772	1.124	0.922	1.031	1.171	9	9	9	0.943095	0.229393	-0.0845251	0.63942	0.960751	0.397626	-0.0577652	0.400525
811	A0A4X1SL39	PDZK1	PDZ domain containing 1 OS=Sus scrofa OX=9823 GN=PDZK1 PE=1 SV=1	1.134	0.857	0.884	0.592	0.788	0.833	0.984	1.042	1.236	1.018	0.893	0.832	1.02	0.891	0.71	1.006	1.009	0.872	1.082	1.066	1.183	0.802	0.91	0.751	1.031	1.001	0.886	9	9	9	0.958448	0.622531	-0.0612278	0.205839	0.947084	0.397723	-0.078435	0.400419
968	A0A287A4C6	CDK19	Cyclin dependent kinase 19 OS=Sus scrofa OX=9823 GN=CDK19 PE=3 SV=1	0.957	1.006	0.875	1.142	1.063	1.133	1.146	1.165	1.245	0.957	0.693	0.844	1.09	1.087	1.098	1.084	1.191	1.11	0.966	1.023	0.967	0.959	1.181	1.157	1.162	1.088	1.13	9	9	9	1.01028	0.827181	0.0147512	0.0823994	0.950275	0.398037	-0.0735829	0.400076
1571	A0A5G2QUK6	AACS	Acetoacetyl-CoA synthetase OS=Sus scrofa OX=9823 GN=AACS PE=3 SV=2	1.027	1.235	1.145	1.144	0.913	0.985	0.973	1.169	1.158	1.009	0.95	0.839	0.945	0.886	0.969	0.921	0.992	0.869	0.92	0.969	0.941	0.798	0.955	1.261	0.965	0.908	1.025	9	9	9	1.11519	0.0613615	0.157291	1.2121	0.958591	0.398115	-0.0610131	0.399991
2479	A0A287BQT1	PTPN7	protein-tyrosine-phosphatase OS=Sus scrofa OX=9823 GN=PTPN7 PE=4 SV=1	1	0.996	1.022	0.967	1.042	0.794	1.168	1.175	1.095	0.954	0.841	0.915	1.016	0.824	0.939	0.857	1.293	1.062	1.224	0.902	0.915	1.049	1.146	0.994	1.13	1.008	0.837	9	9	9	1.00587	0.91782	0.00843866	0.0372423	0.945247	0.398237	-0.0812365	0.399859
1723	F1S1B8	MRM1	rRNA methyltransferase 1, mitochondrial OS=Sus scrofa OX=9823 GN=MRM1 PE=3 SV=2	1.11	1.089	1.11	1.194	1.253	1.178	0.973	1.232	1.169	0.941	0.823	0.935	1.092	1.045	1.028	0.849	0.877	0.836	1.014	1.043	1.022	0.944	1.446	1.106	0.836	0.857	0.749	9	9	9	1.14317	0.0760072	0.193045	1.11915	0.934457	0.398783	-0.0977996	0.399263
2969	F1S5Y7	CLCC1	Chloride channel CLIC-like protein 1 OS=Sus scrofa OX=9823 GN=CLCC1 PE=1 SV=4	1.094	0.887	0.944	1.265	0.904	0.972	0.914	0.867	1.022	1.09	0.966	1	1.141	0.895	1.053	1.057	0.931	0.837	0.935	1.102	1.043	0.942	0.892	1.248	0.98	0.967	1.333	9	9	9	0.939314	0.348526	-0.090321	0.457765	0.950011	0.398816	-0.0739845	0.399227
1220	A0A286ZQ85	COL3A1	Collagen type III alpha 1 chain OS=Sus scrofa OX=9823 GN=COL3A1 PE=1 SV=3	0.852	0.852	0.886	0.938	0.994	0.859	0.894	0.665	0.618	0.865	1.456	0.895	1.175	1.092	1.014	1.154	0.962	1.082	1.076	1.027	1.004	1.026	0.81	1.088	1.088	1.096	0.954	9	9	9	0.824299	0.00311852	-0.27876	2.50605	1.05737	0.399133	0.0804765	0.398882
1381	A0A286ZQ50	NUP155	Nucleoporin 155 OS=Sus scrofa OX=9823 GN=NUP155 PE=1 SV=1	1.027	1.07	1.109	0.989	0.937	1.063	1.072	1.133	1.166	1.023	0.907	0.971	1.052	0.942	1.061	1.018	0.985	0.991	0.938	1.02	1.056	0.999	1.038	1.032	0.978	1.015	1.035	9	9	9	1.04994	0.0815797	0.0703064	1.08842	0.982329	0.399454	-0.0257217	0.398533
1695	A0A5G2R8J0	TCOF1	Treacle ribosome biosis factor 1 OS=Sus scrofa OX=9823 GN=TCOF1 PE=1 SV=1	0.864	1.143	1.064	1.156	1.186	0.882	1.053	0.958	0.937	0.973	0.999	1.01	1.146	0.974	0.967	0.956	1.018	0.982	1.045	1.058	1.092	0.838	1.214	1.293	0.907	0.966	1.015	9	9	9	0.980378	0.745757	-0.0285906	0.127403	0.957255	0.400192	-0.0630248	0.397732
1407	F2Z4Y0	SNRPD3	Small nuclear ribonucleoprotein Sm D3 OS=Sus scrofa OX=9823 GN=SNRPD3 PE=1 SV=2	0.994	0.879	0.937	1.044	0.963	1.173	0.993	1.01	0.845	1.147	0.741	0.813	0.928	0.844	0.917	0.987	0.906	0.949	0.923	1.145	0.924	0.87	0.874	1.012	0.79	0.862	1.423	9	9	9	1.0017	0.982024	0.00245065	0.00787811	0.933016	0.400215	-0.100026	0.397707
889	A0A4X1W4F0	SMC5	Structural maintenance of chromosomes protein 5 OS=Sus scrofa OX=9823 GN=SMC5 PE=3 SV=1	1.04	1.112	1.139	1.164	0.964	0.99	1.1	1.047	1.106	1.046	1.108	1.014	0.822	1.085	1.14	0.994	0.969	1.12	1.002	1.022	0.972	1.265	1.018	1.31	1.013	1.17	0.955	9	9	9	0.993318	0.886561	-0.00967306	0.0522913	0.955896	0.400493	-0.0650745	0.397405
2340	A0A4X1UT36	PSMD5	26S proteasome non-ATPase regulatory subunit 5 OS=Sus scrofa OX=9823 GN=PSMD5 PE=1 SV=1	0.928	0.851	0.82	0.942	0.905	1.069	1.001	1.043	1.169	0.897	0.914	0.848	0.899	0.992	0.984	1.077	1.06	0.987	0.87	0.98	0.83	0.769	0.98	1.059	0.929	0.979	0.955	9	9	9	1.04514	0.392662	0.0637021	0.405981	1.03676	0.401125	0.0520848	0.396721
2779	I3L5V6	SARM1	NAD(+) hydrolase SARM1 OS=Sus scrofa OX=9823 GN=SARM1 PE=2 SV=1	1.052	0.961	0.97	0.965	0.847	0.997	0.995	1.056	1.12	1.035	0.972	1.036	1.125	1.103	1.095	1.151	1.024	0.973	1.003	1.001	0.902	0.809	0.747	1.187	1.069	0.867	1.382	9	9	9	0.999554	0.995108	-0.000643701	0.00212984	1.061	0.402274	0.0854266	0.395478
908	A0A287BHU8	CACUL1	CDK2 associated cullin domain 1 OS=Sus scrofa OX=9823 GN=CACUL1 PE=3 SV=2	0.875	0.824	0.737	1.202	0.759	0.839	1.104	1.059	1.365	0.991	1.524	0.727	0.984	1.194	1.211	1.481	1.559	1.248	1.01	1.043	1.021	1.153	0.856	1.297	1.019	1.275	1.392	9	9	9	0.870654	0.139612	-0.199829	0.855078	1.08474	0.402764	0.11735	0.394949
1336	A0A287AGF9	NOP58	NOP58 ribonucleoprotein OS=Sus scrofa OX=9823 GN=NOP58 PE=1 SV=2	1.066	0.83	0.895	0.964	0.922	1.014	0.925	1.225	1.035	0.978	0.808	0.845	1.018	0.991	0.987	0.954	0.953	0.897	0.866	0.985	0.852	0.823	0.922	1.04	0.962	0.885	0.828	9	9	9	1.08735	0.108271	0.12081	0.965486	1.03283	0.402782	0.0466043	0.39493
615	I3LRT6	FKBP9	peptidylprolyl isomerase OS=Sus scrofa OX=9823 GN=FKBP9 PE=1 SV=2	1.107	1.152	1.133	1.145	0.983	1.004	0.96	1.045	0.999	0.989	1.102	0.971	1.055	1.017	1.094	0.999	0.984	0.946	1.006	1.066	0.965	1.004	1.02	1.232	0.993	1.069	1.048	9	9	9	1.01329	0.707446	0.0190523	0.150307	0.973838	0.404414	-0.0382461	0.393173
1689	A0A287B231	UBQLN1	Ubiquilin 1 OS=Sus scrofa OX=9823 GN=UBQLN1 PE=1 SV=2	0.597	1.065	1.219	0.918	0.942	0.928	0.978	1	1.001	0.787	0.627	0.869	1.029	0.84	0.85	0.993	1.13	0.892	0.805	0.833	0.853	0.953	1.126	0.96	1.011	0.93	1.005	9	9	9	1.02029	0.771137	0.0289829	0.112868	0.945847	0.404418	-0.0803211	0.39317
1889	F1S4V3	FHIP2A	FHF complex subunit HOOK interacting protein 2A OS=Sus scrofa OX=9823 GN=FHIP2A PE=3 SV=1	0.996	0.829	0.821	0.863	0.89	0.837	0.996	0.859	0.83	1.076	1.103	0.895	0.971	0.935	0.998	0.99	0.998	0.919	0.953	1.052	0.932	0.794	0.741	1.147	0.932	1	0.97	9	9	9	0.929586	0.180088	-0.10534	0.744514	1.04272	0.404664	0.060349	0.392905
675	F1RRU7	MRC2	Mannose receptor C type 2 OS=Sus scrofa OX=9823 GN=MRC2 PE=1 SV=5	0.817	1.341	1.445	1.07	0.942	1.183	0.921	1.066	1.082	0.792	1.11	1.176	0.936	1.025	1.041	1.1	1.003	1.002	1.158	0.873	1.056	1.057	1.085	1.231	1.047	1.059	1.001	9	9	9	1.03136	0.663463	0.0445449	0.178183	0.960071	0.404763	-0.0587869	0.392799
2326	A0A5G2QXI3	CASP6	Caspase-6 OS=Sus scrofa OX=9823 GN=CASP6 PE=1 SV=1	1.151	1.088	0.977	1.162	1.145	1.114	1.232	1.281	1.271	1.09	0.901	0.914	1.12	1.07	1.097	0.981	1.082	1.046	0.906	0.895	1.099	1.05	1.53	1.365	1.103	1.066	0.894	9	9	9	1.05178	0.487922	0.072828	0.31165	0.938736	0.405021	-0.091208	0.392523
2026	A0A287B789	RABGAP1L	RAB GTPase activating protein 1 like OS=Sus scrofa OX=9823 GN=RABGAP1L PE=4 SV=2	0.909	1.218	1.235	1.213	1.191	1.048	1.086	1.076	0.967	1.159	0.844	1.065	1.147	0.864	0.998	0.852	0.983	0.954	0.949	0.91	1.172	1.006	1.668	1.287	0.867	0.939	0.831	9	9	9	1.03261	0.727469	0.0462952	0.138185	0.92076	0.405192	-0.119103	0.392339
549	P02067	HBB	Hemoglobin subunit beta OS=Sus scrofa OX=9823 GN=HBB PE=1 SV=3	0.962	1.353	1.511	0.879	0.966	1.004	0.751	0.876	0.767	0.98	1.179	0.846	0.887	0.881	0.874	0.968	0.794	1.33	0.688	0.781	0.867	2.269	1.203	0.885	0.901	2.061	0.707	9	9	9	0.875217	0.520881	-0.192287	0.283261	0.84337	0.405567	-0.245762	0.391938
980	I3L9J4	CCT6A	T-complex protein 1 subunit zeta OS=Sus scrofa OX=9823 GN=CCT6A PE=1 SV=2	1.063	1.06	1.061	1.01	1.017	0.948	1.078	0.992	1.067	1.03	0.917	0.946	0.998	0.885	0.991	0.969	0.96	0.973	0.931	0.931	1.014	1.012	1.024	0.939	0.953	1.028	0.991	9	9	9	1.05361	0.0187135	0.0753408	1.72785	0.982546	0.405568	-0.0254037	0.391936
1416	A0A4X1T3F8	CHMP4B	Charged multivesicular body protein 4B OS=Sus scrofa OX=9823 GN=CHMP4B PE=1 SV=1	1.013	0.858	0.843	0.821	0.809	0.897	0.858	0.657	0.649	1.145	1.348	0.97	0.884	0.821	0.978	1.151	1.058	0.942	1.136	1.008	1.196	0.761	0.79	0.767	0.879	1.068	1.092	9	9	9	0.851443	0.0531565	-0.232018	1.27444	1.06899	0.405731	0.0962474	0.391762
68	F1RUJ0	CAP2	Adenylyl cyclase-associated protein OS=Sus scrofa OX=9823 GN=CAP2 PE=1 SV=3	0.808	0.953	1.036	1.037	1.023	1.222	0.847	0.707	0.835	0.909	0.936	0.885	0.905	1.122	1.03	1.107	0.966	0.846	0.934	1.111	0.866	0.968	0.906	0.932	0.891	0.864	0.917	9	9	9	1.00942	0.882162	0.0135224	0.0544518	1.03779	0.405741	0.0535112	0.391751
1435	A0A8D1HJ06	MTPAP	Mitochondrial poly(A) polymerase OS=Sus scrofa OX=9823 GN=MTPAP PE=4 SV=1	0.927	1.005	0.959	1.05	1.009	1.062	0.852	0.85	0.79	1.102	0.926	0.885	0.955	0.994	1.071	0.815	0.908	0.776	1.107	1.118	0.947	0.841	0.96	1.253	0.777	0.831	1.094	9	9	9	0.952509	0.463506	-0.0701954	0.333944	0.944444	0.406702	-0.0824622	0.390724
241	K7GMM7	ABCB1	ATP-binding cassette, sub-family B (MDR/TAP), member 1 OS=Sus scrofa OX=9823 GN=ABCB1 PE=1 SV=2	1.05	0.883	0.892	0.881	0.952	1.032	1.059	1.097	1.214	0.904	0.943	0.925	1.088	0.897	0.903	1.027	1.04	1.005	1.028	0.925	1.009	0.897	0.924	1.046	1.032	1.065	1.05	9	9	9	1.00936	0.833585	0.0134384	0.0790504	0.972816	0.406914	-0.0397605	0.390498
422	F1SMW9	PSMD1	26S proteasome non-ATPase regulatory subunit 1 OS=Sus scrofa OX=9823 GN=PSMD1 PE=3 SV=4	1.013	0.887	0.992	1.046	0.984	1.138	0.973	0.831	0.903	1.048	0.816	0.967	1.082	1.147	1.073	0.956	0.93	0.908	0.963	1.01	1.028	1.071	1.07	1.073	1.027	1.014	0.961	9	9	9	0.951177	0.165241	-0.072214	0.781883	0.968536	0.407067	-0.0461218	0.390334
2764	I3LRC4	YARS2	Tyrosine--tRNA ligase OS=Sus scrofa OX=9823 GN=YARS2 PE=1 SV=3	1.203	1.254	1.295	1.222	1.161	1.239	1.198	1.191	1.189	1.154	1.029	1.106	1.155	1.061	1.087	1.076	1.027	1.063	0.972	1.132	1.108	1.105	1.384	1.27	1.141	1.119	0.912	9	9	9	1.07976	0.0970675	0.11071	1.01293	0.962043	0.407159	-0.055827	0.390236
2648	A0A4X1TPT1	LOC100519675	Large ribosomal subunit protein eL33 OS=Sus scrofa OX=9823 GN=LOC100519675 PE=1 SV=1	1.212	1.257	1.238	1.015	1.162	0.894	0.967	1.013	1.046	1.11	1.024	1.126	1.008	0.661	0.963	0.991	0.981	1.055	1.173	0.912	1.206	1.024	1.109	0.935	0.983	1.071	0.947	9	9	9	1.04744	0.39358	0.066862	0.404967	0.952885	0.407524	-0.0696266	0.389847
742	I3LC46	HTATSF1	HIV-1 Tat specific factor 1 OS=Sus scrofa OX=9823 GN=HTATSF1 PE=1 SV=2	0.913	1.046	0.978	0.932	0.904	0.784	0.893	0.828	0.785	1.026	0.877	1.01	0.92	0.798	0.859	0.892	0.935	0.87	1.085	1.064	1.017	0.914	0.91	0.853	1.007	0.912	0.755	9	9	9	0.946695	0.287583	-0.0790286	0.541237	0.961254	0.407728	-0.0570105	0.389629
1995	I3LSS2	CHMP2A	Charged multivesicular body protein 2a OS=Sus scrofa OX=9823 GN=CHMP2A PE=3 SV=2	1.081	1.023	1.072	1.002	0.959	1.053	1.011	0.892	0.947	1.008	0.886	1.068	1.084	1.035	1.031	1.001	1.059	1.049	0.932	0.997	1.14	1.109	1.084	0.931	0.896	0.994	0.832	9	9	9	1.01402	0.73632	0.020088	0.132934	1.03432	0.407953	0.0486884	0.38939
2217	K9IW82	NFKB2	Nuclear factor NF-kappa-B p100 subunit isoform X1 OS=Sus scrofa OX=9823 GN=NFKB2 PE=2 SV=1	1.041	0.982	1.083	1.095	1.031	0.865	0.968	0.99	0.991	0.98	0.925	0.947	1.051	0.905	0.969	0.946	0.926	0.976	0.945	0.963	1.018	0.831	1.037	1.105	0.948	0.908	1.147	9	9	9	1.01618	0.695374	0.0231505	0.157782	0.968883	0.408059	-0.045605	0.389277
567	F1S8T7	NPM3	Nucleophosmin/nucleoplasmin 3 OS=Sus scrofa OX=9823 GN=NPM3 PE=3 SV=1	1.049	1.019	1.078	1.05	1.028	1.041	1.086	1.264	1.149	1.068	0.869	0.976	0.965	1.008	1.028	0.965	1.045	0.952	1.026	1.045	0.946	0.752	0.896	0.901	0.955	0.968	1.09	9	9	9	1.13813	0.00683873	0.186663	2.16502	1.03462	0.408412	0.0491002	0.388901
575	I3LUB3	SH3GLB2	Endophilin-B2 OS=Sus scrofa OX=9823 GN=SH3GLB2 PE=1 SV=3	0.974	1.017	0.939	1.05	1.004	0.867	0.998	0.863	0.903	1.039	0.988	1.008	1.065	0.976	1.039	1.04	1.022	0.921	1.035	1.054	1.036	0.874	0.962	1.18	1.004	1.008	1.261	9	9	9	0.915126	0.0660417	-0.127957	1.18018	0.966433	0.408627	-0.0492584	0.388673
428	F1ST81	DBNL	Drebrin like OS=Sus scrofa OX=9823 GN=DBNL PE=1 SV=4	0.89	0.952	0.942	1.034	1.063	0.702	1.197	1.1	0.996	0.819	1.133	0.973	1.05	1.065	0.943	0.957	1.09	1.054	0.987	1.007	0.977	0.933	1.104	0.979	0.986	1.225	1.285	9	9	9	0.935991	0.296948	-0.0954339	0.527319	0.957925	0.408635	-0.0620158	0.388664
391	F1RRF2	STT3B	dolichyl-diphosphooligosaccharide--protein glycotransferase OS=Sus scrofa OX=9823 GN=STT3B PE=1 SV=1	1.164	0.892	0.871	1.114	0.969	1.039	0.904	0.878	1.028	1.075	0.924	0.964	1.038	0.978	1.02	1.123	0.912	0.853	1.02	1.019	1.05	0.963	0.999	1.179	0.934	1.008	0.994	9	9	9	0.966507	0.438354	-0.0491484	0.358175	0.969561	0.409324	-0.0445958	0.387933
510	A0A287A690	PRDX2	Peroxiredoxin-2 OS=Sus scrofa OX=9823 GN=PRDX2 PE=1 SV=1	1.041	1.15	1.229	0.968	1	0.949	0.992	1.015	1.041	1.05	0.97	0.98	1.017	0.934	0.969	0.97	0.969	1.144	0.893	0.988	0.927	1.192	1.026	0.931	0.991	1.338	1.126	9	9	9	0.997131	0.959012	-0.00414458	0.018176	0.956545	0.410013	-0.0640955	0.387202
1110	A0A287AU85	MCM4	DNA replication licensing factor MCM4 OS=Sus scrofa OX=9823 GN=MCM4 PE=1 SV=1	1.119	1.034	1.153	0.978	1.022	0.703	1.065	1.009	1.092	1.312	0.908	0.969	0.978	0.633	0.825	0.803	0.987	0.873	1.001	1.126	0.956	0.973	1.406	0.917	0.759	0.937	0.872	9	9	9	1.02548	0.740578	0.0363041	0.130429	0.926344	0.410188	-0.11038	0.387017
2872	A0A5G2QL96	1	Mediator of DNA damage checkpoint protein 1 OS=Sus scrofa OX=9823 GN=MDC1 PE=4 SV=2	1.02	0.976	0.979	1.017	0.94	1.011	1.299	1.052	0.929	1.032	1.048	0.972	0.891	1.091	0.972	1.151	1.263	1.158	0.871	1.059	0.99	0.84	1.052	1.081	1.294	1.026	0.914	9	9	9	1.01052	0.857262	0.0150954	0.0668866	1.04941	0.410436	0.0695837	0.386755
1236	A0A5G2R2I1	PKP2	Plakophilin 2 OS=Sus scrofa OX=9823 GN=PKP2 PE=3 SV=1	1.11	1.05	1.083	1.075	1.104	0.965	1.032	0.74	0.769	0.995	0.969	0.937	1.069	1.02	1.061	1.008	1.052	1.135	1.075	0.963	1.115	0.923	1.14	1.112	0.937	1.061	1.217	9	9	9	0.935555	0.256579	-0.0961058	0.590779	0.968878	0.410495	-0.0456135	0.386692
509	A0A5G2QII0	DEK	DEK proto-onco OS=Sus scrofa OX=9823 GN=DEK PE=1 SV=1	1.084	1.047	1.086	0.988	1.056	0.973	0.959	0.813	0.862	1.113	0.94	1.023	1.186	1.031	1.037	1.036	1.127	0.805	0.993	1.017	1.093	1.103	1.206	0.973	1.159	0.993	1.112	9	9	9	0.919059	0.0569175	-0.121771	1.24475	0.963623	0.411458	-0.053459	0.385674
1917	F1RUZ5	TMEM134	Transmembrane protein 134 OS=Sus scrofa OX=9823 GN=TMEM134 PE=3 SV=3	1.238	0.782	1.282	1.049	1.418	1.449	1.138	1.129	1	1.007	0.961	0.984	1.166	1.481	1.539	0.959	1.044	0.8	0.905	1.14	1.014	0.825	1.505	1.27	0.87	0.635	0.86	9	9	9	1.1619	0.169026	0.216488	0.772047	1.10162	0.412071	0.139624	0.385028
935	A0A5G2QN24	ITIH4	Inter-alpha-trypsin inhibitor heavy chain 4 OS=Sus scrofa OX=9823 GN=ITIH4 PE=1 SV=1	1.118	1.183	1.092	0.887	0.903	0.872	0.938	0.841	1.048	1.323	1.016	0.895	1.006	1.413	0.863	0.903	0.878	0.97	0.909	1.245	1.271	1.258	1.005	1.046	0.912	1.116	1.127	9	9	9	0.89817	0.0942645	-0.15494	1.02565	0.937102	0.412238	-0.0937223	0.384852
43	A0A5K1U589	UBA1	Ubiquitin-like modifier-activating enzyme 1 OS=Sus scrofa OX=9823 GN=UBA1 PE=1 SV=2	1.082	1.093	1.08	1.076	0.998	0.871	1.054	1.085	1.053	1.051	0.992	1.024	0.975	0.964	0.935	0.959	1.01	1.015	0.973	1.009	1.038	0.866	0.938	0.942	0.972	0.96	1.055	9	9	9	1.073	0.0330225	0.101655	1.48119	1.01965	0.412599	0.0280746	0.384472
1130	A0A8D0NHD1	PUS1	Pseudouridine synthase 1 OS=Sus scrofa OX=9823 GN=PUS1 PE=1 SV=1	1.289	1.117	1	0.978	0.95	0.873	1.084	1.062	1.07	1.012	0.955	0.972	0.891	0.859	0.951	0.948	1.074	0.949	0.932	0.778	1.006	0.691	0.884	1.05	0.95	1.013	0.969	9	9	9	1.13901	0.0353562	0.187776	1.45153	1.04086	0.413039	0.0577702	0.384009
1440	A0A5G2RBI3	ANXA6	Annexin OS=Sus scrofa OX=9823 GN=ANXA6 PE=1 SV=2	0.979	0.878	0.974	0.913	1.096	0.964	1.048	1.046	1.035	0.977	0.85	0.92	0.955	1.042	1.075	1.009	1.052	0.992	0.946	1.075	0.963	0.879	0.875	0.689	1.122	1.048	0.898	9	9	9	1.05156	0.343167	0.0725308	0.464495	1.04438	0.413053	0.0626454	0.383994
378	A0A8W4F8A6	C9	Complement component C9 OS=Sus scrofa OX=9823 GN=C9 PE=1 SV=1	1.008	0.917	0.862	0.762	0.846	0.766	0.999	0.714	0.666	1.115	1.192	0.924	1.178	1.124	1.086	1.038	1.085	0.924	1	1.028	1.059	1.193	0.778	1.099	0.956	1.004	1.156	9	9	9	0.813113	0.00396837	-0.298472	2.40139	1.04238	0.413321	0.0598828	0.383712
1537	F1S4D0	CLCA4	VWFA domain-containing protein OS=Sus scrofa OX=9823 GN=CLCA4 PE=1 SV=3	0.929	0.779	0.939	0.9	1.147	0.935	0.907	0.963	1.108	0.965	1.008	1.091	1.037	0.974	0.783	1.253	0.889	0.827	1.087	1.114	1.075	0.767	1.045	1.136	0.959	0.933	1.195	9	9	9	0.924391	0.187993	-0.113426	0.725859	0.948018	0.414144	-0.0770129	0.382848
1076	A0A287BF71	TJP1	Tight junction protein 1 OS=Sus scrofa OX=9823 GN=TJP1 PE=1 SV=2	0.921	1	0.853	0.927	0.977	0.966	1.022	0.93	0.972	1.037	0.919	0.848	1.037	1.116	0.988	1.049	1.094	0.913	1.032	1.047	0.955	1.018	0.877	1.147	0.99	1.027	1.271	9	9	9	0.914994	0.0547732	-0.128166	1.26143	0.961235	0.41482	-0.0570396	0.382141
944	A1XQU1	PSMB7	Proteasome subunit beta type-7 OS=Sus scrofa OX=9823 GN=PSMB7 PE=2 SV=2	1.013	1.01	1.037	0.927	0.884	0.927	0.999	0.789	0.745	0.972	1.102	1.025	0.959	1.049	1.05	1.056	0.993	1.019	0.972	1.025	1.037	1.036	0.798	0.784	1.05	1.046	1.148	9	9	9	0.936488	0.25412	-0.0946671	0.594962	1.03698	0.414847	0.0523921	0.382112
1725	F1SAD9	PDIA4	Protein disulfide-isomerase OS=Sus scrofa OX=9823 GN=PDIA4 PE=1 SV=1	1.114	0.987	0.912	0.976	0.986	1.138	1.091	0.829	0.92	1.11	0.94	0.957	1.036	1.137	1.009	1.049	0.955	0.905	1.013	0.963	1.073	1.018	0.946	0.923	1.061	0.958	0.89	9	9	9	1.01221	0.769008	0.017509	0.114069	1.0286	0.415077	0.0406873	0.381872
1134	F1S1A8	NDUFS2	NADH dehydrogenase [ubiquinone] iron-sulfur protein 2, mitochondrial OS=Sus scrofa OX=9823 GN=NDUFS2 PE=1 SV=3	1.029	1.146	1.119	1.077	0.945	1.105	1.131	1.169	1.349	1.039	1.037	1.094	0.993	1.024	0.983	0.994	1.072	1.166	1.07	0.977	0.959	0.778	1.149	1.059	1.075	1.093	0.921	9	9	9	1.10891	0.0526498	0.149141	1.2786	1.03535	0.416454	0.0501165	0.380433
1073	F6PVF4	RELA	RELA proto-oncogene, NF-kB subunit OS=Sus scrofa OX=9823 GN=RELA PE=4 SV=2	1.109	1.082	0.956	1.255	1.066	1.011	0.924	0.911	0.938	1.025	0.992	0.988	1.106	1.066	1.095	1.038	0.999	0.905	0.985	1.121	1.089	0.905	1.119	1.245	0.973	1.014	1.061	9	9	9	0.972666	0.57369	-0.0399834	0.241323	0.968671	0.416725	-0.0459211	0.38015
2893	A0A5G2R3E4	ACADVL	Very long-chain specific acyl-CoA dehydrogenase, mitochondrial OS=Sus scrofa OX=9823 GN=ACADVL PE=1 SV=1	1.129	1.029	1.077	1.085	0.978	1.054	1.102	1.006	1.005	1.049	1.015	0.945	1.009	1.063	0.908	0.977	0.931	0.942	1.078	1.062	1.029	0.851	1.088	1.042	1.003	1.135	0.843	9	9	9	1.03658	0.348435	0.0518296	0.457878	0.968021	0.416973	-0.0468897	0.379892
791	A0A8W4FPR2	AARS1	Alanine--tRNA ligase OS=Sus scrofa OX=9823 GN=AARS1 PE=1 SV=1	1.032	0.927	0.961	0.966	0.935	0.929	1.022	0.977	1.004	0.996	0.937	0.941	1.074	0.963	0.992	0.959	0.953	0.902	0.943	1.048	1.039	0.93	0.929	1.134	0.927	0.923	1.082	9	9	9	0.977443	0.470846	-0.0329159	0.327121	0.973423	0.41706	-0.0388617	0.379802
2681	A0A8D1NRT6	NDUFA13	NADH dehydrogenase [ubiquinone] 1 alpha subcomplex subunit 13 OS=Sus scrofa OX=9823 GN=NDUFA13 PE=1 SV=1	1.028	0.882	0.905	0.969	0.831	0.893	0.93	1.043	1.23	0.937	0.887	0.857	0.826	0.836	0.949	1.062	0.957	0.927	0.84	1.09	0.99	0.666	0.939	1.037	0.931	0.993	1.161	9	9	9	1.0074	0.911059	0.0106387	0.0404535	0.9527	0.417543	-0.0699056	0.379299
199	A0A5G2QHD9	FUBP3	Far upstream element binding protein 3 OS=Sus scrofa OX=9823 GN=FUBP3 PE=1 SV=1	1.095	1.002	1.047	0.944	0.897	1.012	0.993	0.923	0.914	1.102	1.002	0.951	0.953	0.993	0.985	1.055	1.013	0.919	0.972	0.996	0.996	0.922	1.082	1.094	0.986	0.976	1.208	9	9	9	0.956131	0.236117	-0.06472	0.626872	0.971945	0.417997	-0.0410528	0.378827
289	F1RLL9	COL4A2	Collagen type IV alpha 2 chain OS=Sus scrofa OX=9823 GN=COL4A2 PE=1 SV=3	0.931	0.943	0.987	1.06	0.942	0.71	0.916	0.744	0.741	0.951	1.112	0.959	1.069	0.989	1.038	1.138	0.981	0.909	1.077	1.01	1.022	0.926	0.93	1.228	1.034	1.008	1.267	9	9	9	0.839192	0.00904335	-0.252928	2.04367	0.962534	0.41808	-0.0550903	0.37874
954	A0A287AVW1	ATP1A2	Sodium/potassium-transporting ATPase subunit alpha OS=Sus scrofa OX=9823 GN=ATP1A2 PE=1 SV=2	0.948	1.098	1.138	1.115	1.067	1.228	1.041	0.97	1.042	0.979	1.062	1.008	1.035	1.112	1.132	0.846	1.106	1.082	1.005	1.187	0.842	0.919	1.016	1.066	0.978	0.859	1.126	9	9	9	1.07213	0.15455	0.100476	0.81093	1.04045	0.418341	0.0572124	0.378469
1996	F1ST54	ALDH1B1	Aldehyde dehydrogenase X, mitochondrial OS=Sus scrofa OX=9823 GN=ALDH1B1 PE=1 SV=1	1.298	1.496	1.295	0.721	0.846	0.688	0.856	1.136	1.51	1.271	1.982	1.009	1.256	0.983	0.821	1.034	0.973	0.829	0.925	0.99	1.408	0.715	0.732	0.97	1.143	0.953	1.262	9	9	9	1.08222	0.539206	0.113988	0.268245	1.11651	0.418414	0.158995	0.378394
435	P06867	PLG	Plasminogen OS=Sus scrofa OX=9823 GN=PLG PE=1 SV=3	0.864	1.037	0.905	0.986	0.936	0.941	1.007	0.958	1.017	0.963	1.043	0.809	1.005	1.111	1.079	1.084	0.931	1.128	0.933	0.918	0.861	1.547	1.023	1.114	1.028	1.205	1.101	9	9	9	0.889106	0.124569	-0.169573	0.904589	0.940699	0.418503	-0.0881951	0.378302
2952	F1SCY2	IFIT3	Interferon induced protein with tetratricopeptide repeats 3 OS=Sus scrofa OX=9823 GN=IFIT3 PE=1 SV=3	0.952	0.861	0.977	1.05	1.082	0.881	1.12	0.97	0.913	1.029	1.442	1.151	1.188	1.005	0.939	0.969	1.029	0.787	1.101	1.091	1.128	1.073	1.043	1.152	0.927	1.095	1.561	9	9	9	0.865795	0.0383905	-0.207903	1.41578	0.937863	0.418562	-0.0925516	0.37824
1829	F1RR06	NMT1	Glycylpeptide N-tetradecanoyltransferase OS=Sus scrofa OX=9823 GN=NMT1 PE=1 SV=3	1.07	1.034	1.142	1.08	1.061	1.058	1.011	1.042	0.973	1.003	0.855	0.966	0.937	1.042	0.991	0.885	0.968	1.003	1.01	0.948	0.998	1.081	1.094	0.955	0.946	0.981	0.867	9	9	9	1.06655	0.0354418	0.0929571	1.45048	0.974099	0.419027	-0.0378595	0.377758
817	A0A4X1TVI4	LOC110261685	Chromobox protein homolog 3 OS=Sus scrofa OX=9823 GN=LOC110261685 PE=1 SV=1	1.123	1.141	1.083	0.881	0.995	1.058	1.189	0.989	1.056	1.142	1.073	1.064	0.971	0.903	1.04	0.913	0.951	1.073	0.994	0.964	0.964	0.902	0.767	0.892	1.083	1.103	1.111	9	9	9	1.08371	0.114523	0.115983	0.941106	1.03986	0.419028	0.0563939	0.377757
1795	A0A5G2RFH3	SON	SON DNA and RNA binding protein OS=Sus scrofa OX=9823 GN=SON PE=1 SV=2	1.131	1.098	1.127	1.036	0.986	0.773	1.028	0.915	0.843	1.014	1.006	1.149	1.061	0.806	0.916	0.87	0.914	0.966	1.078	1.016	1.108	0.851	0.97	1.088	0.879	0.984	1.075	9	9	9	0.987623	0.815349	-0.0179677	0.0886566	0.961653	0.419151	-0.0564114	0.377629
547	A0A5G2QPU0	USP5	ubiquitinyl hydrolase 1 OS=Sus scrofa OX=9823 GN=USP5 PE=1 SV=1	1.041	0.933	0.996	0.982	0.953	0.919	1.056	0.883	1.153	1.043	1.025	0.96	0.992	0.952	1.046	0.977	0.984	0.95	0.988	1.016	0.987	0.999	0.972	1.004	1.009	0.984	1.105	9	9	9	0.983672	0.600209	-0.0237512	0.221698	0.985106	0.419199	-0.0216493	0.37758
3021	I3L812	TPP1	Tripeptidyl-peptidase 1 OS=Sus scrofa OX=9823 GN=TPP1 PE=1 SV=1	1.075	1.222	1.038	1.059	1.204	0.639	0.999	1.185	1.157	0.896	1.114	1.258	0.927	0.755	0.895	0.969	0.952	1.012	1.145	0.967	1.022	0.736	1.067	1.29	1.001	0.948	1.125	9	9	9	1.02978	0.699962	0.0423386	0.154926	0.943769	0.419388	-0.0834936	0.377384
871	A0A287A0B3	UBAP2L	Ubiquitin associated protein 2 like OS=Sus scrofa OX=9823 GN=UBAP2L PE=4 SV=3	0.944	1.016	1.109	1.023	1.138	1.002	1.154	1.23	1.002	0.938	0.918	0.894	1.042	0.993	1.053	0.812	1.016	1.056	0.958	0.926	1.001	0.897	1.021	0.876	0.88	0.875	1.026	9	9	9	1.13688	0.00398312	0.185079	2.39978	1.03097	0.419607	0.0440013	0.377158
[truncated: 1,881 more rows]
